# Supplementary material for: Structure–activity relationships in Toll-like receptor 7 agonistic 1H-imidazo[4,5-c]pyridines
Source: Royal Society of Chemistry journal article supplement (doi:10.1039/c3ob40816g), 2013-01-01

# Supplementary Information

## **Structure-Activity Relationships in Toll-like Receptor 7 Agonistic 1*H*-Imidazo[4,5-*c*]pyridines**

Euna Yoo, Breanna M. Crall, Rajalakshmi Balakrishna, Subbalakshmi S.  
Malladi, Lauren M. Fox, Alec R. Hermanson and Sunil A. David\*

Department of Medicinal Chemistry  
University of Kansas

# **1** $^1\text{H}$ NMR

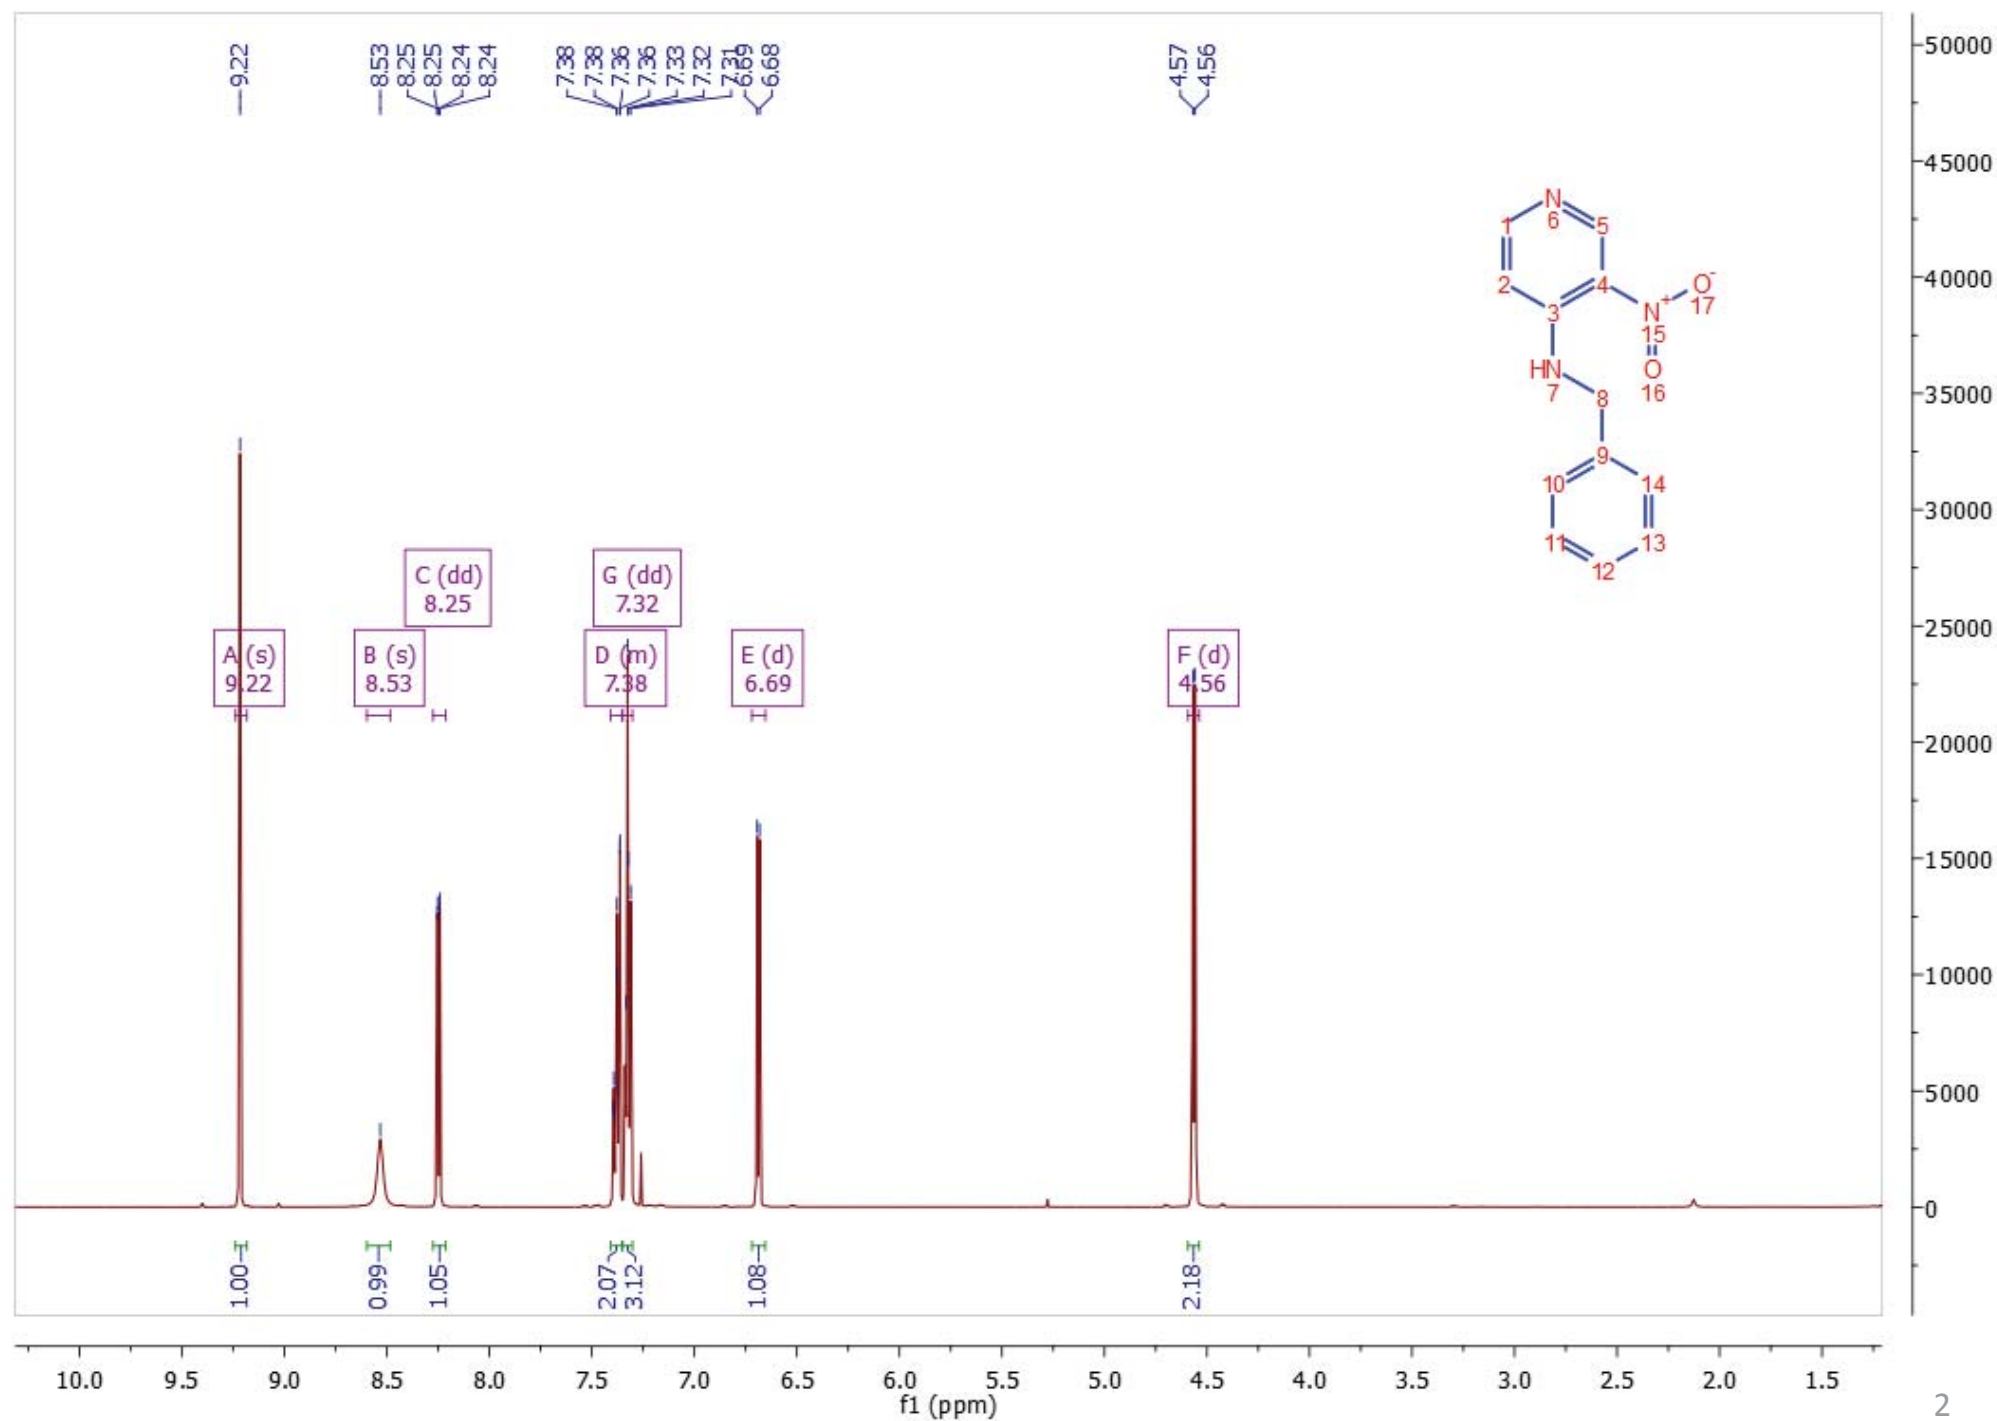

# 1 <sup>13</sup>C NMR

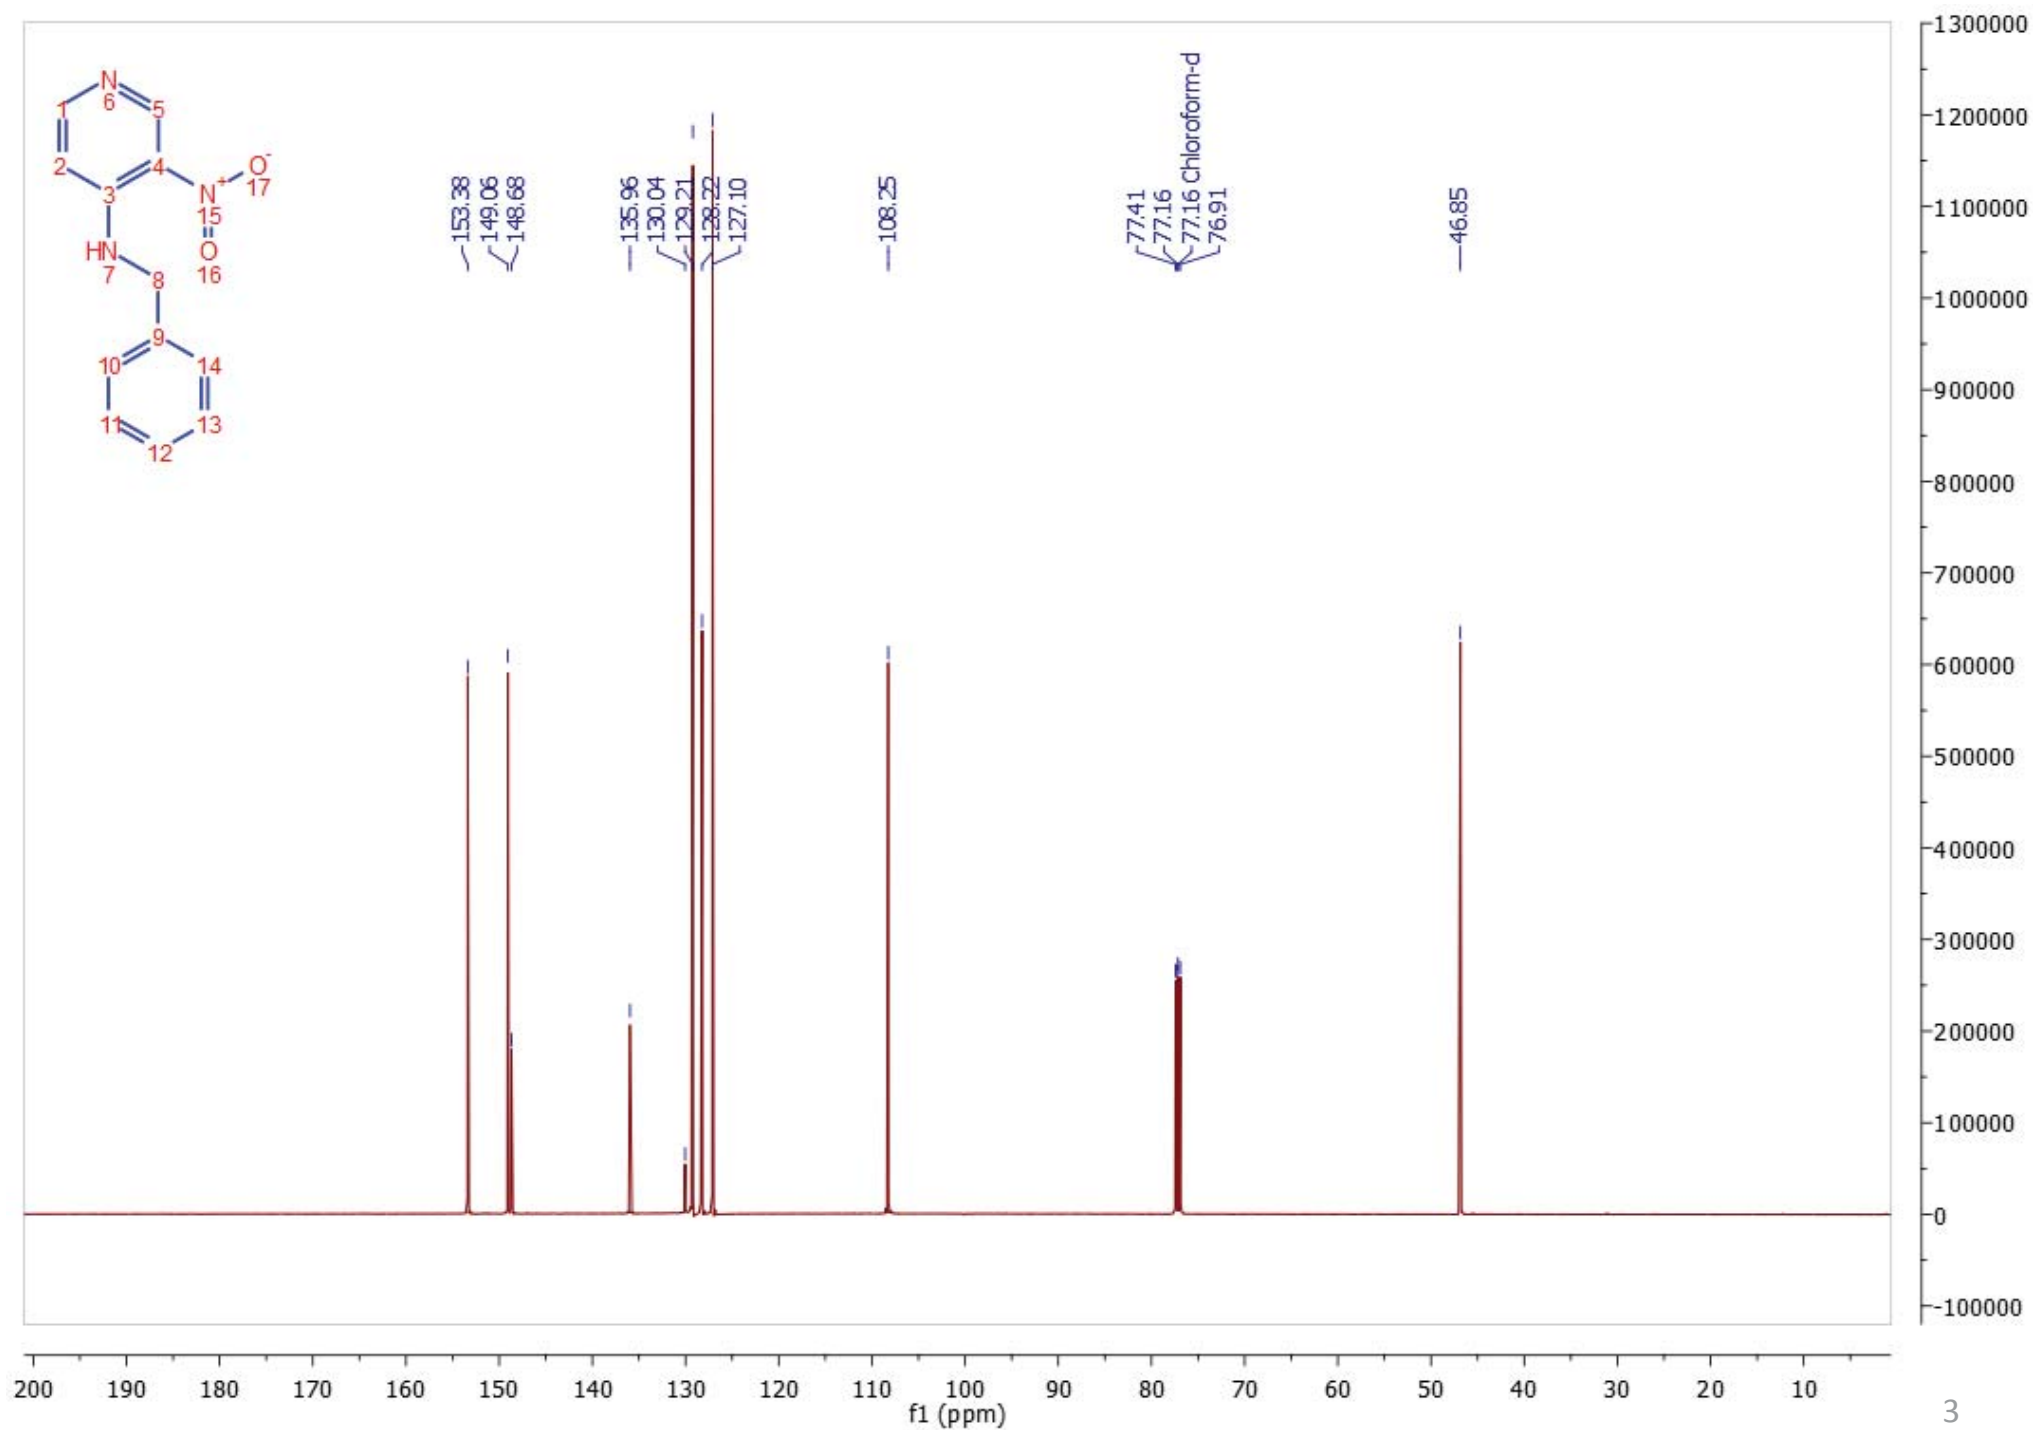

# 1 MS

|               |                     |             |                      |                 |              |                        |                       |
|---------------|---------------------|-------------|----------------------|-----------------|--------------|------------------------|-----------------------|
| Sample Name   | 01.13.12 EY-1-197   | Position    | Vial 1               | Instrument Name | Instrument 1 | User Name              |                       |
| Inj Vol       | -1                  | InjPosition |                      | SampleType      | Sample       | IRM Calibration Status | Success               |
| Data Filename | 01.13.12 EY-1-197.d | ACQ Method  | Water-ACN Infusion M | Comment         |              | Acquired Time          | 1/13/2012 12:47:41 PM |

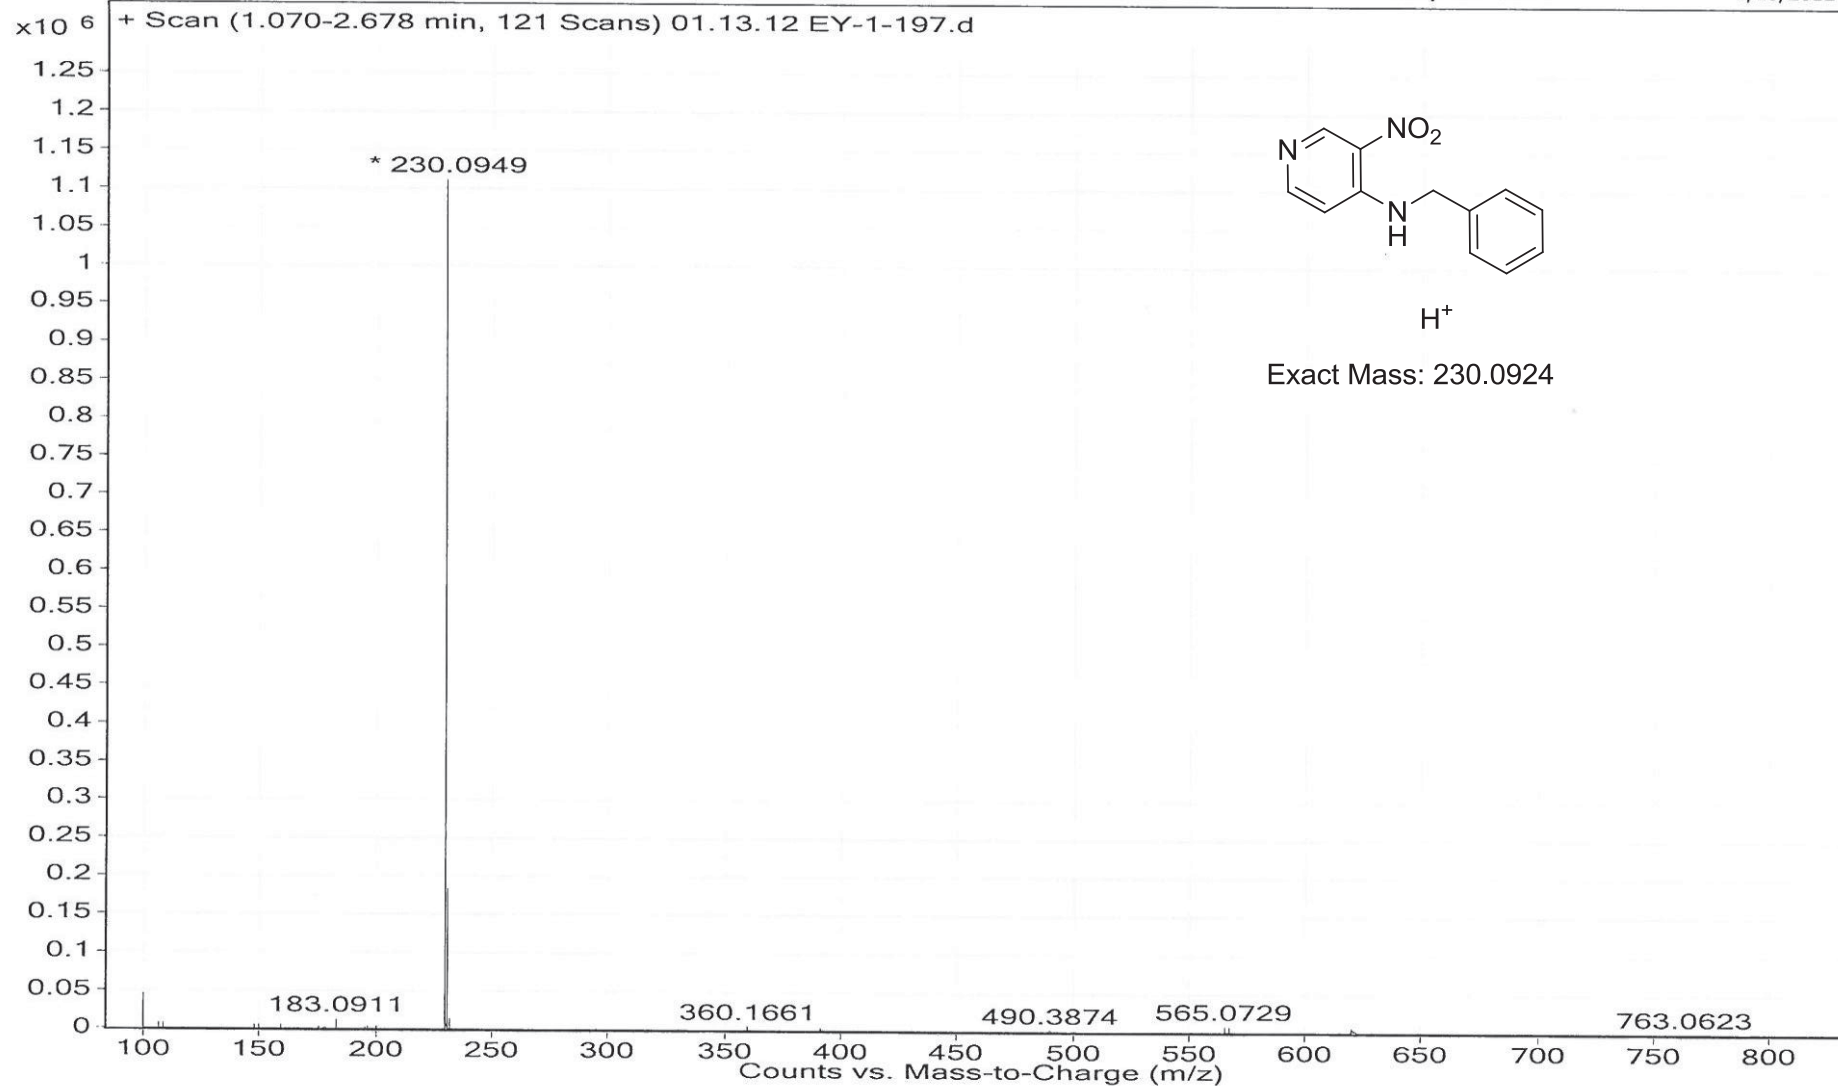



# <sup>2</sup> H NMR

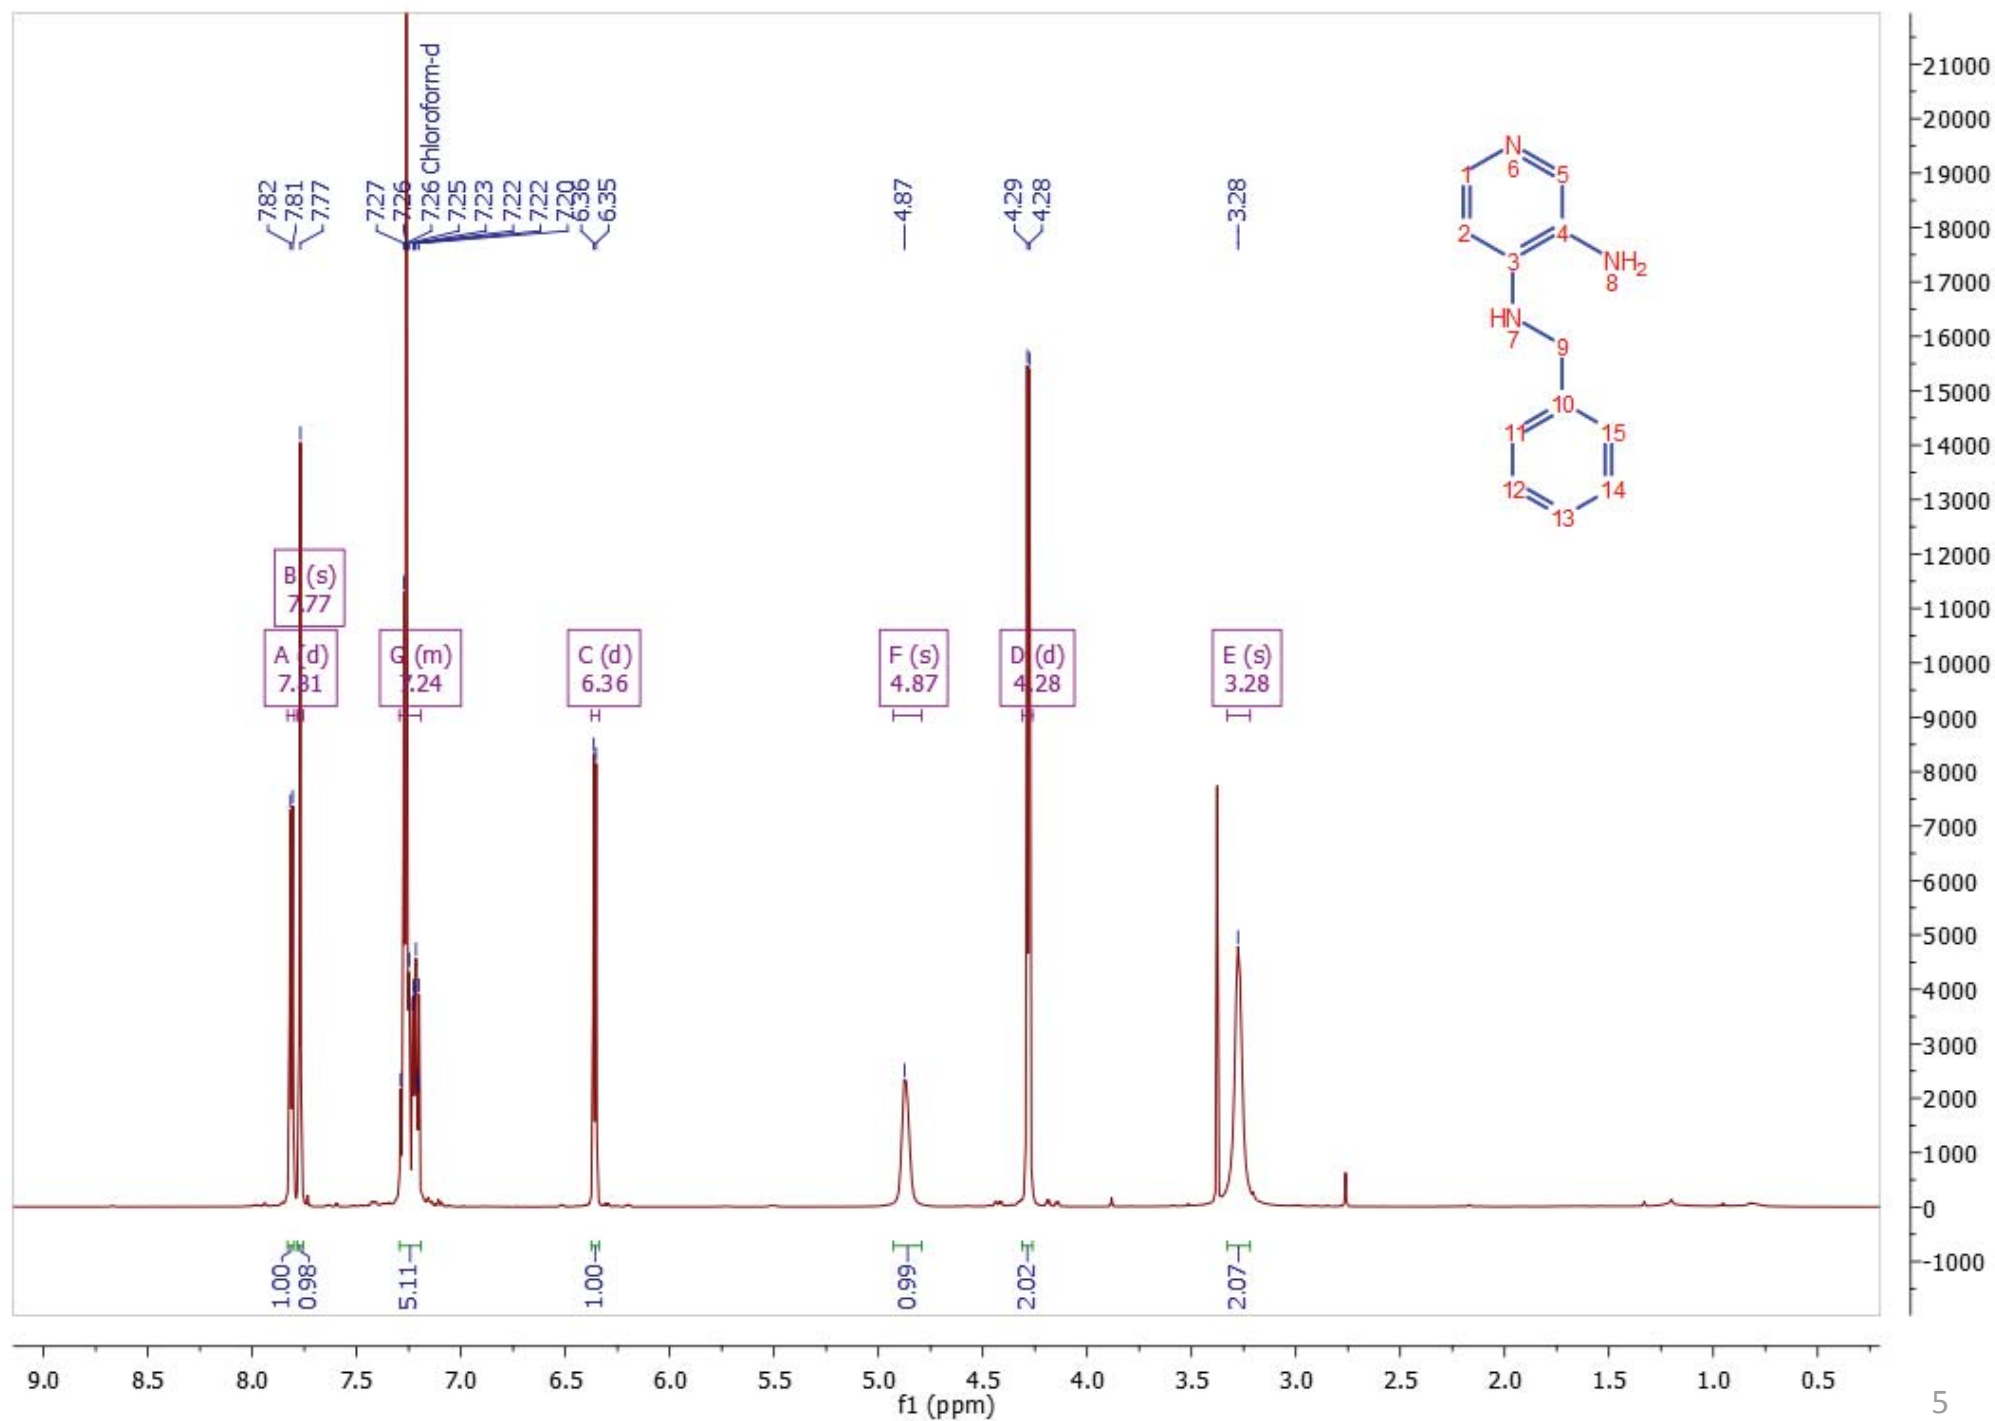

## <sup>2</sup> <sup>13</sup>C NMR

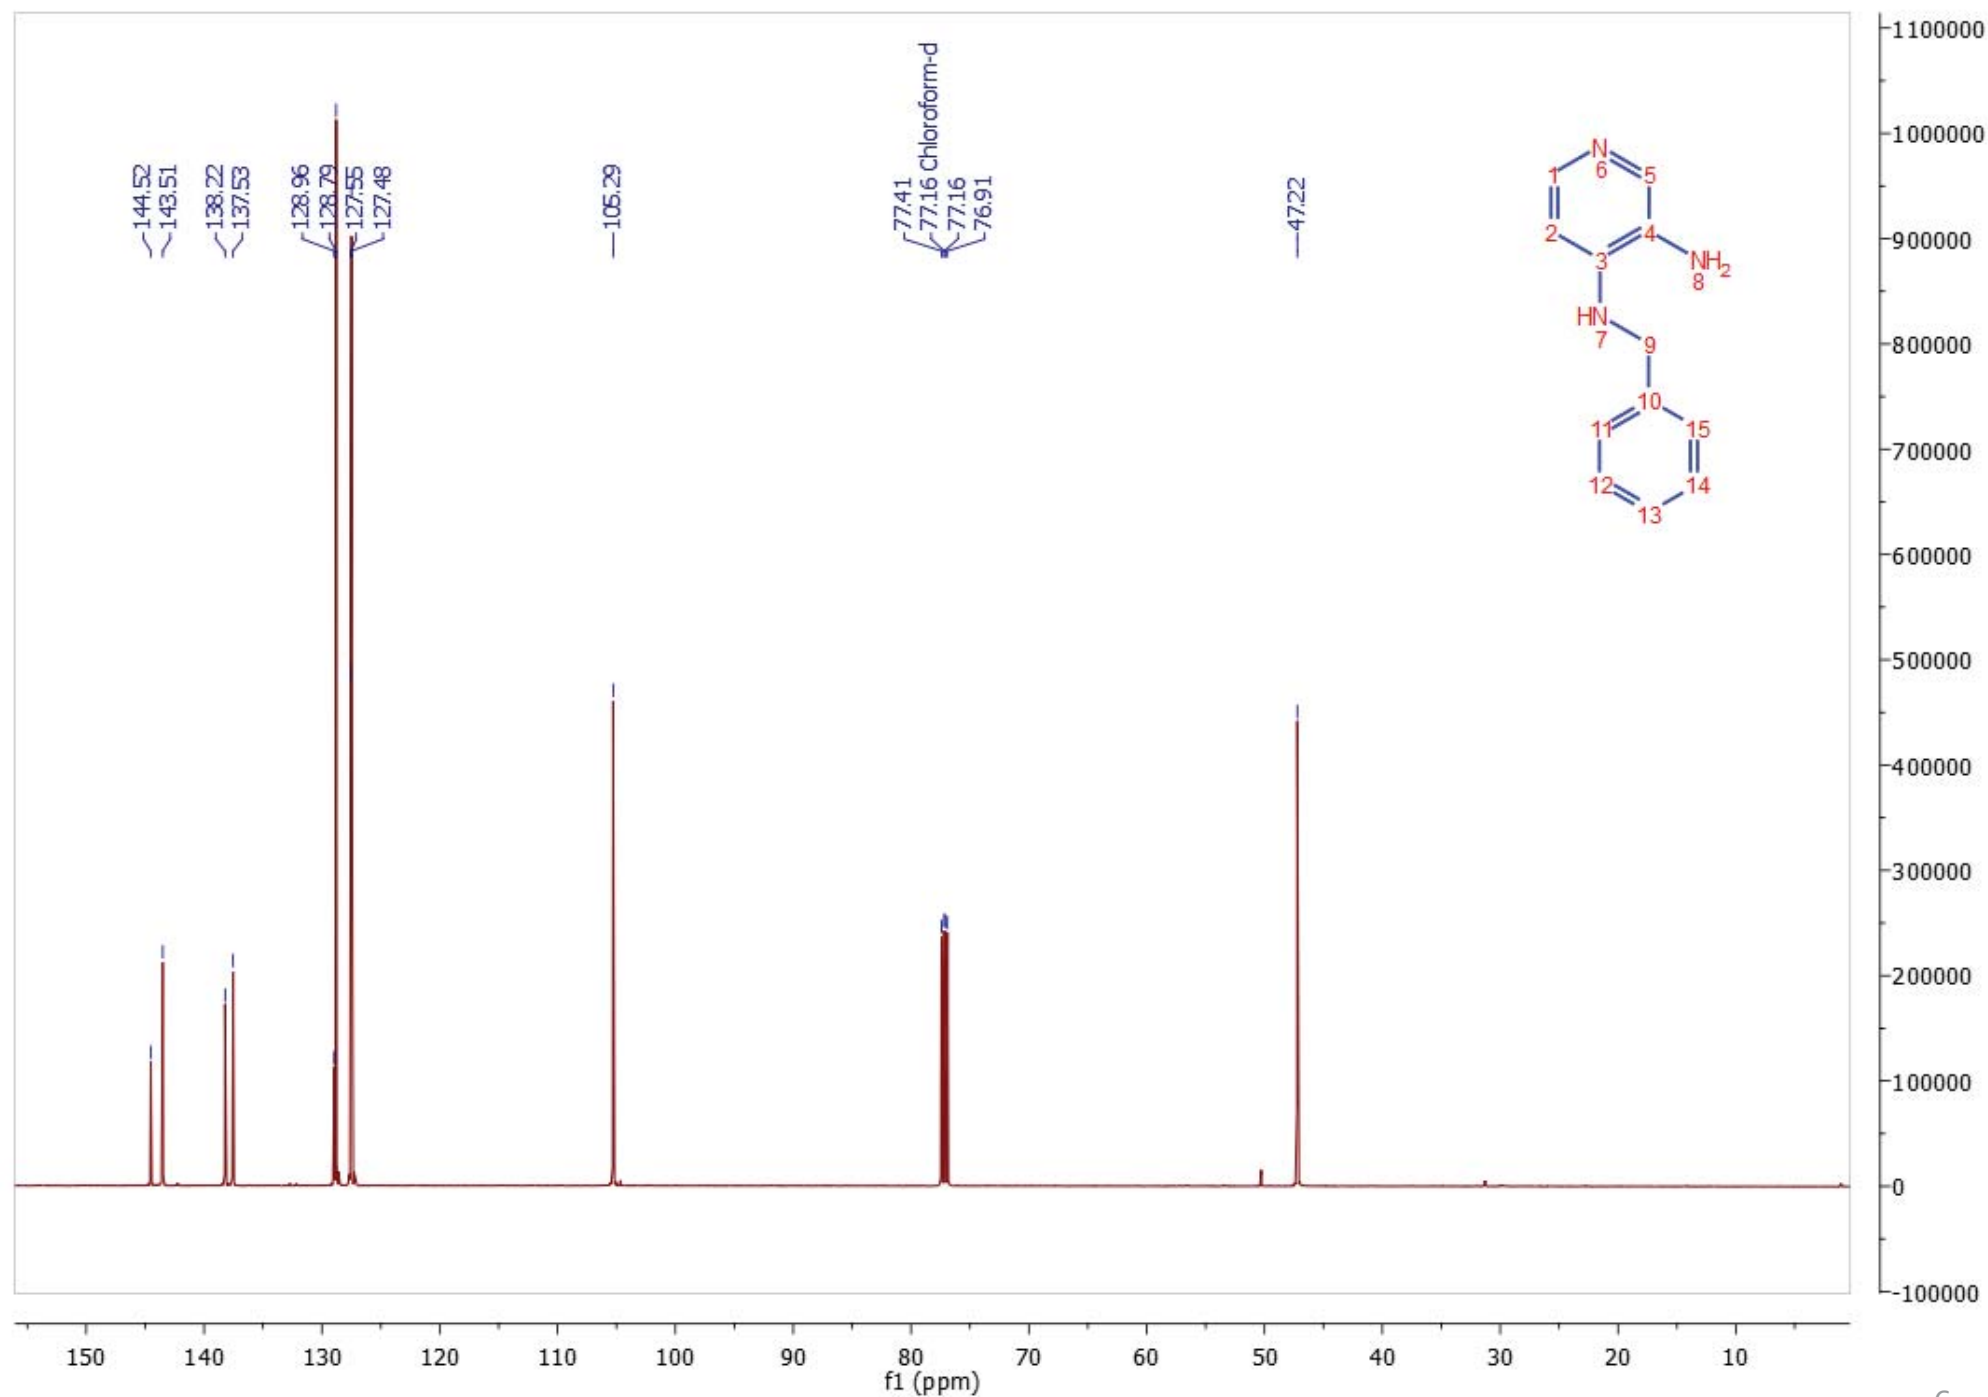

## 2 MS

|               |                     |             |                      |                 |              |                        |                      |
|---------------|---------------------|-------------|----------------------|-----------------|--------------|------------------------|----------------------|
| Sample Name   | 01.14.12 EY-1-199   | Position    | Vial 1               | Instrument Name | Instrument 1 | User Name              |                      |
| Inj Vol       | -1                  | InjPosition |                      | SampleType      | Sample       | IRM Calibration Status | Success              |
| Data Filename | 01.14.12 EY-1-199.d | ACQ Method  | Water-ACN Infusion M | Comment         |              | Acquired Time          | 1/14/2012 4:36:21 PM |

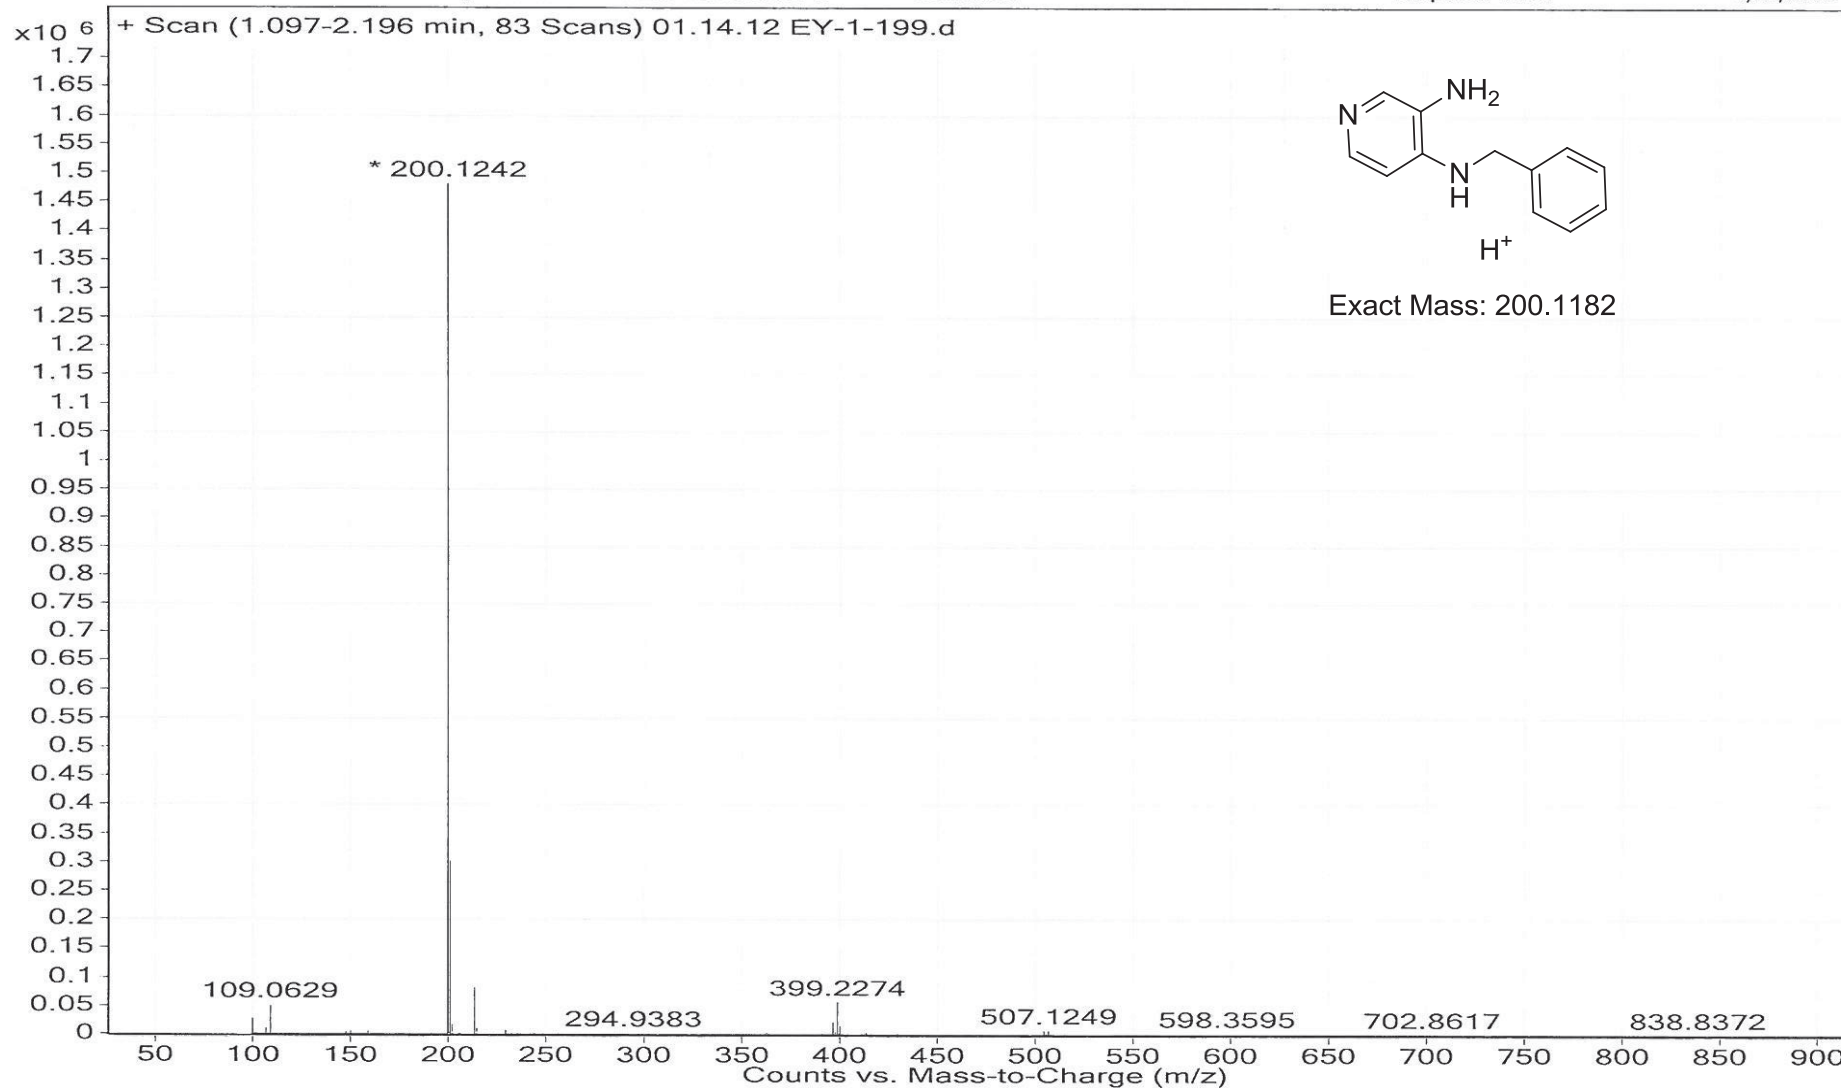

# 3 <sup>1</sup>H NMR

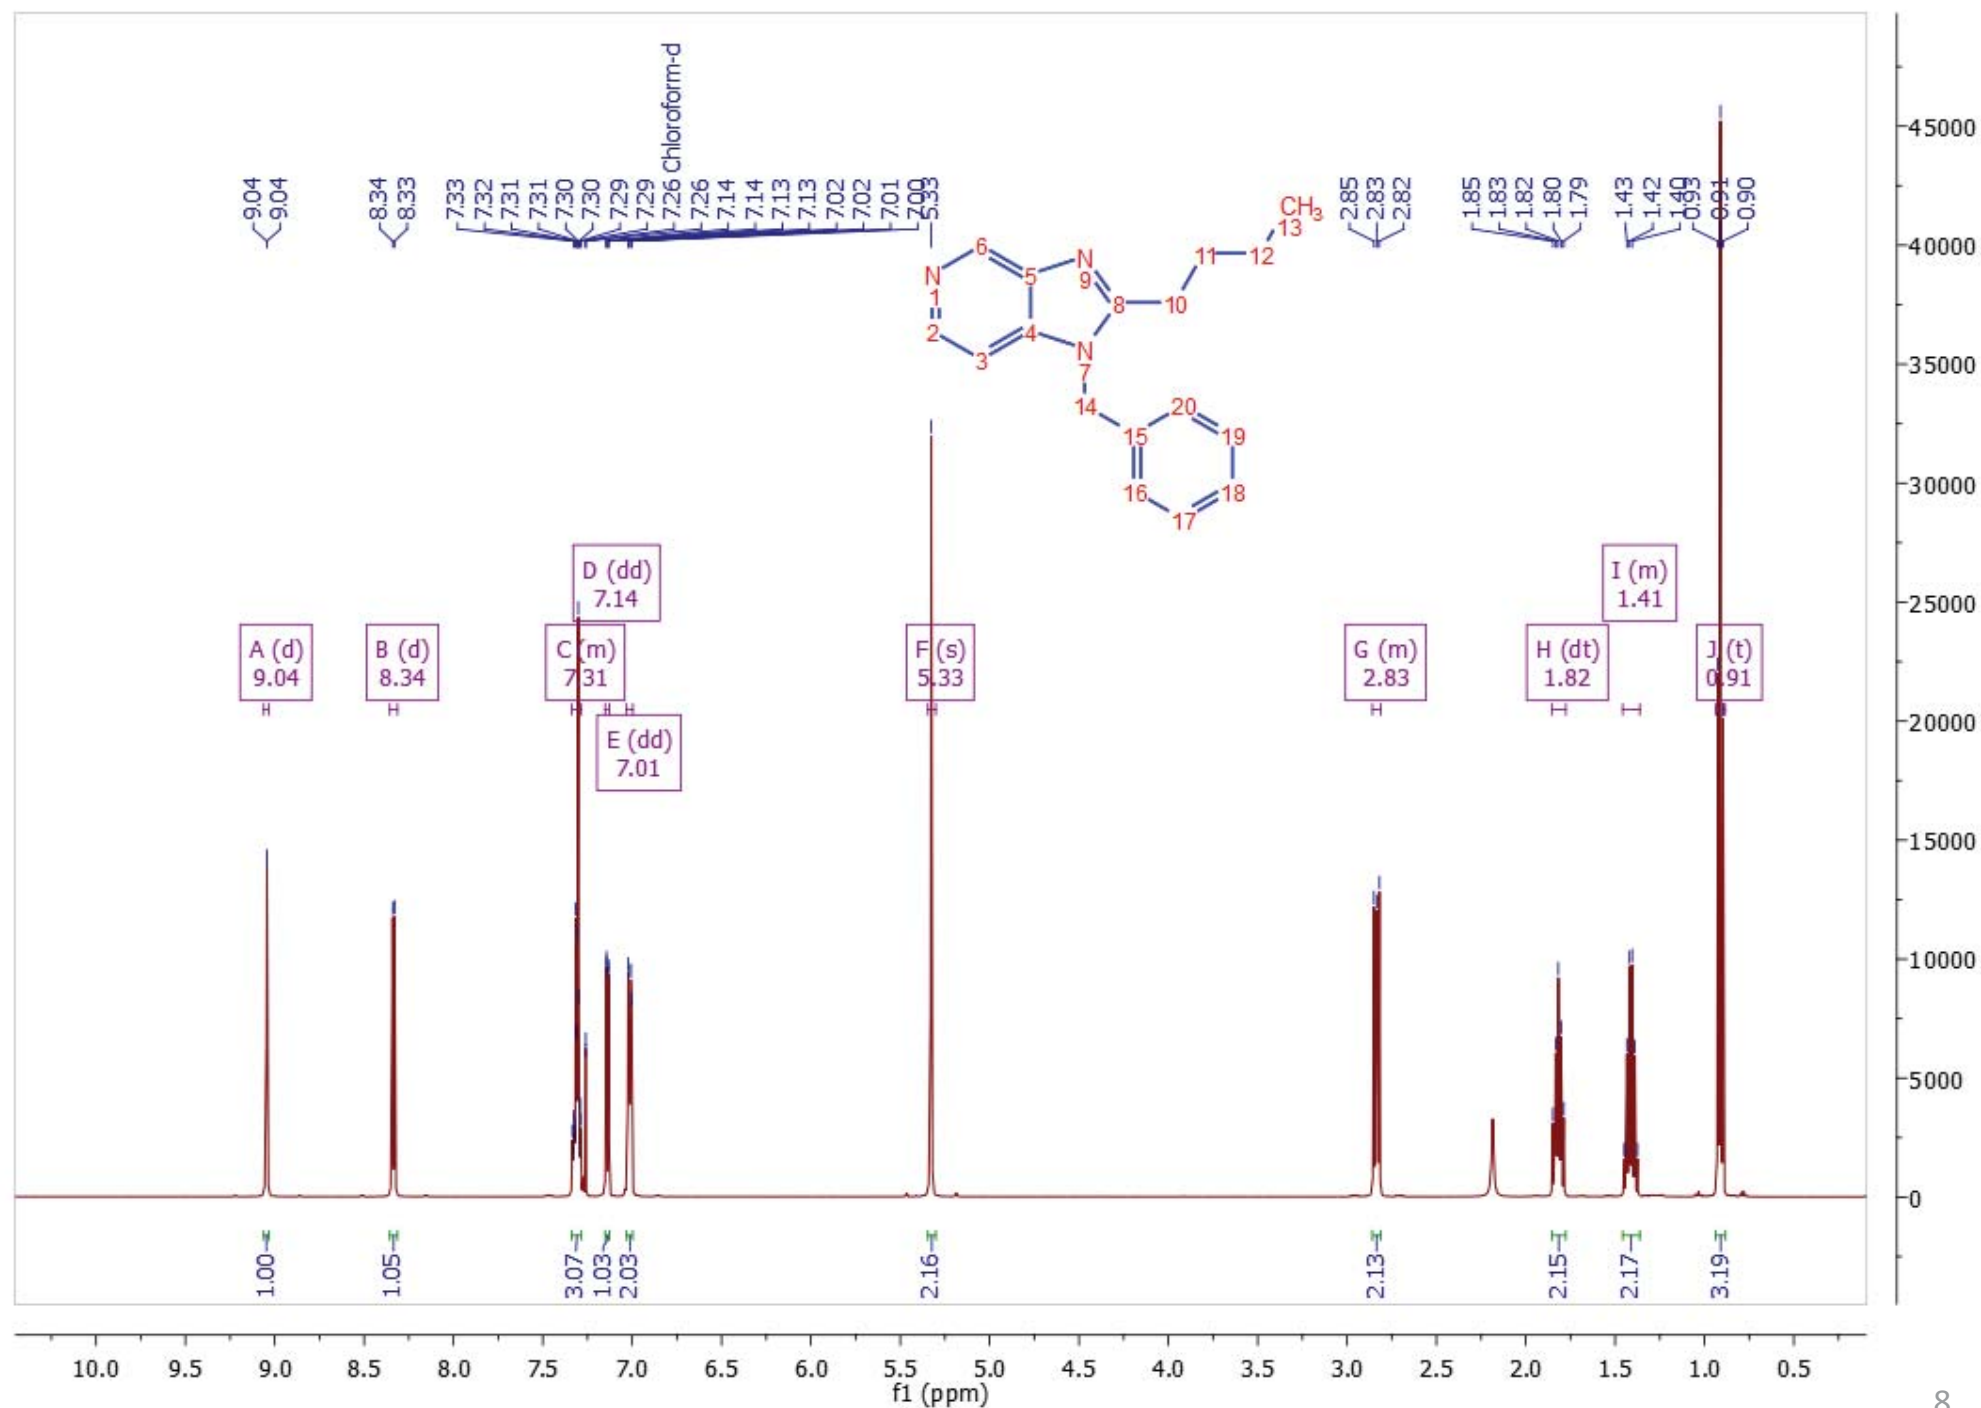

### 3 $^{13}\text{C}$ NMR

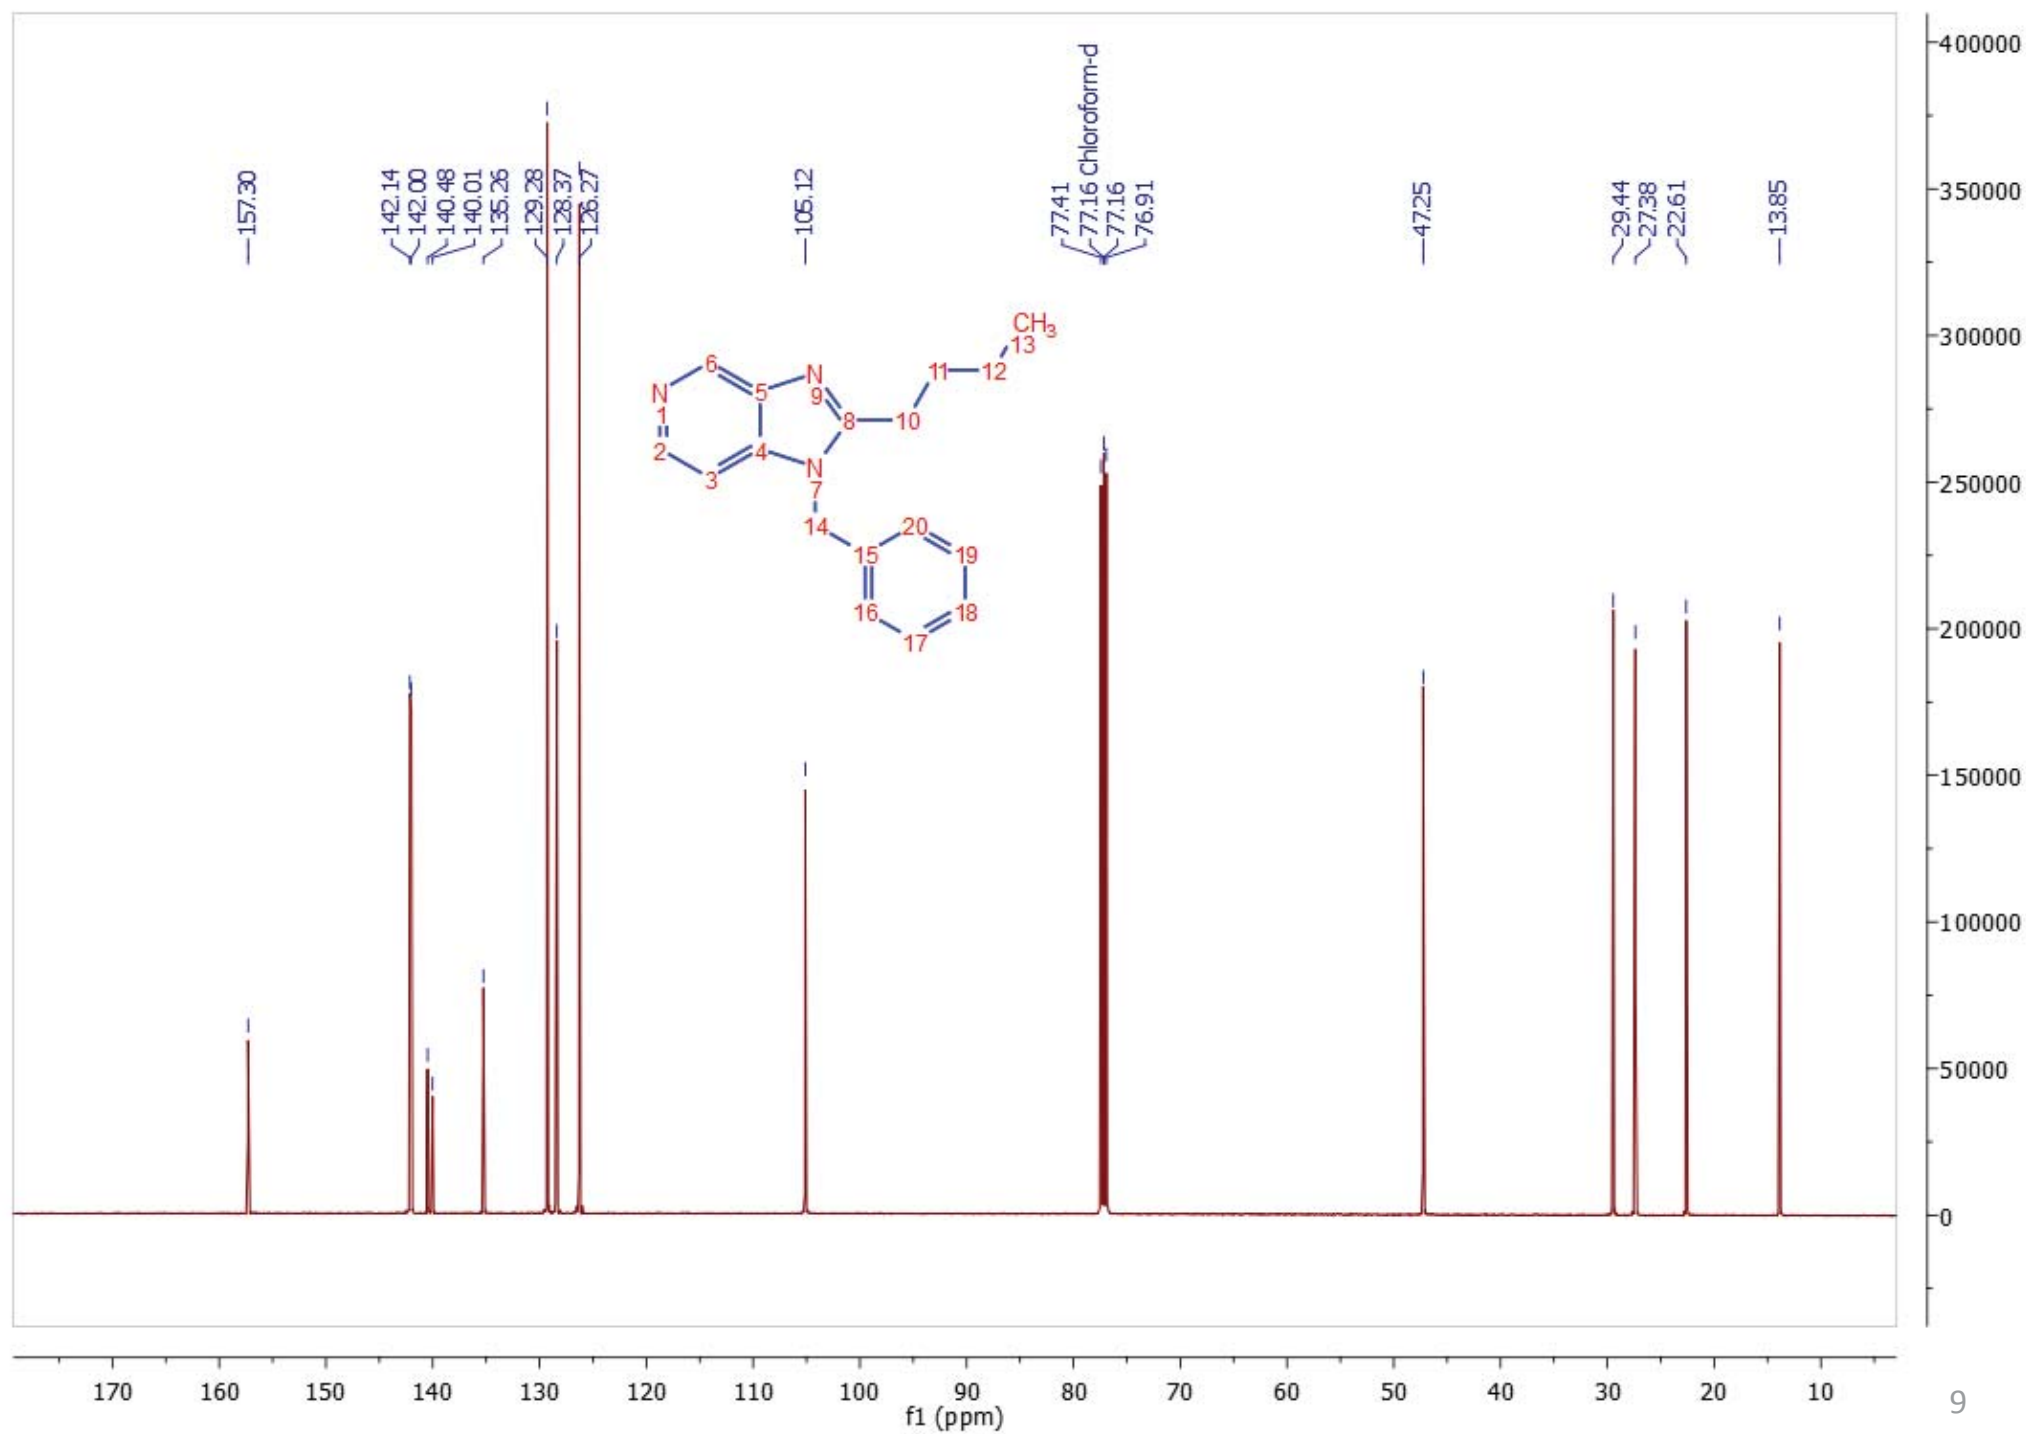

### 3 MS

|               |                   |             |                      |                 |              |                        |                       |
|---------------|-------------------|-------------|----------------------|-----------------|--------------|------------------------|-----------------------|
| Sample Name   | 01.18.12 EY-203   | Position    | Vial 1               | Instrument Name | Instrument 1 | User Name              |                       |
| Inj Vol       | -1                | InjPosition |                      | SampleType      | Sample       | IRM Calibration Status | Success               |
| Data Filename | 01.18.12 EY-203.d | ACQ Method  | Water-ACN Infusion M | Comment         |              | Acquired Time          | 1/18/2012 10:48:09 AM |

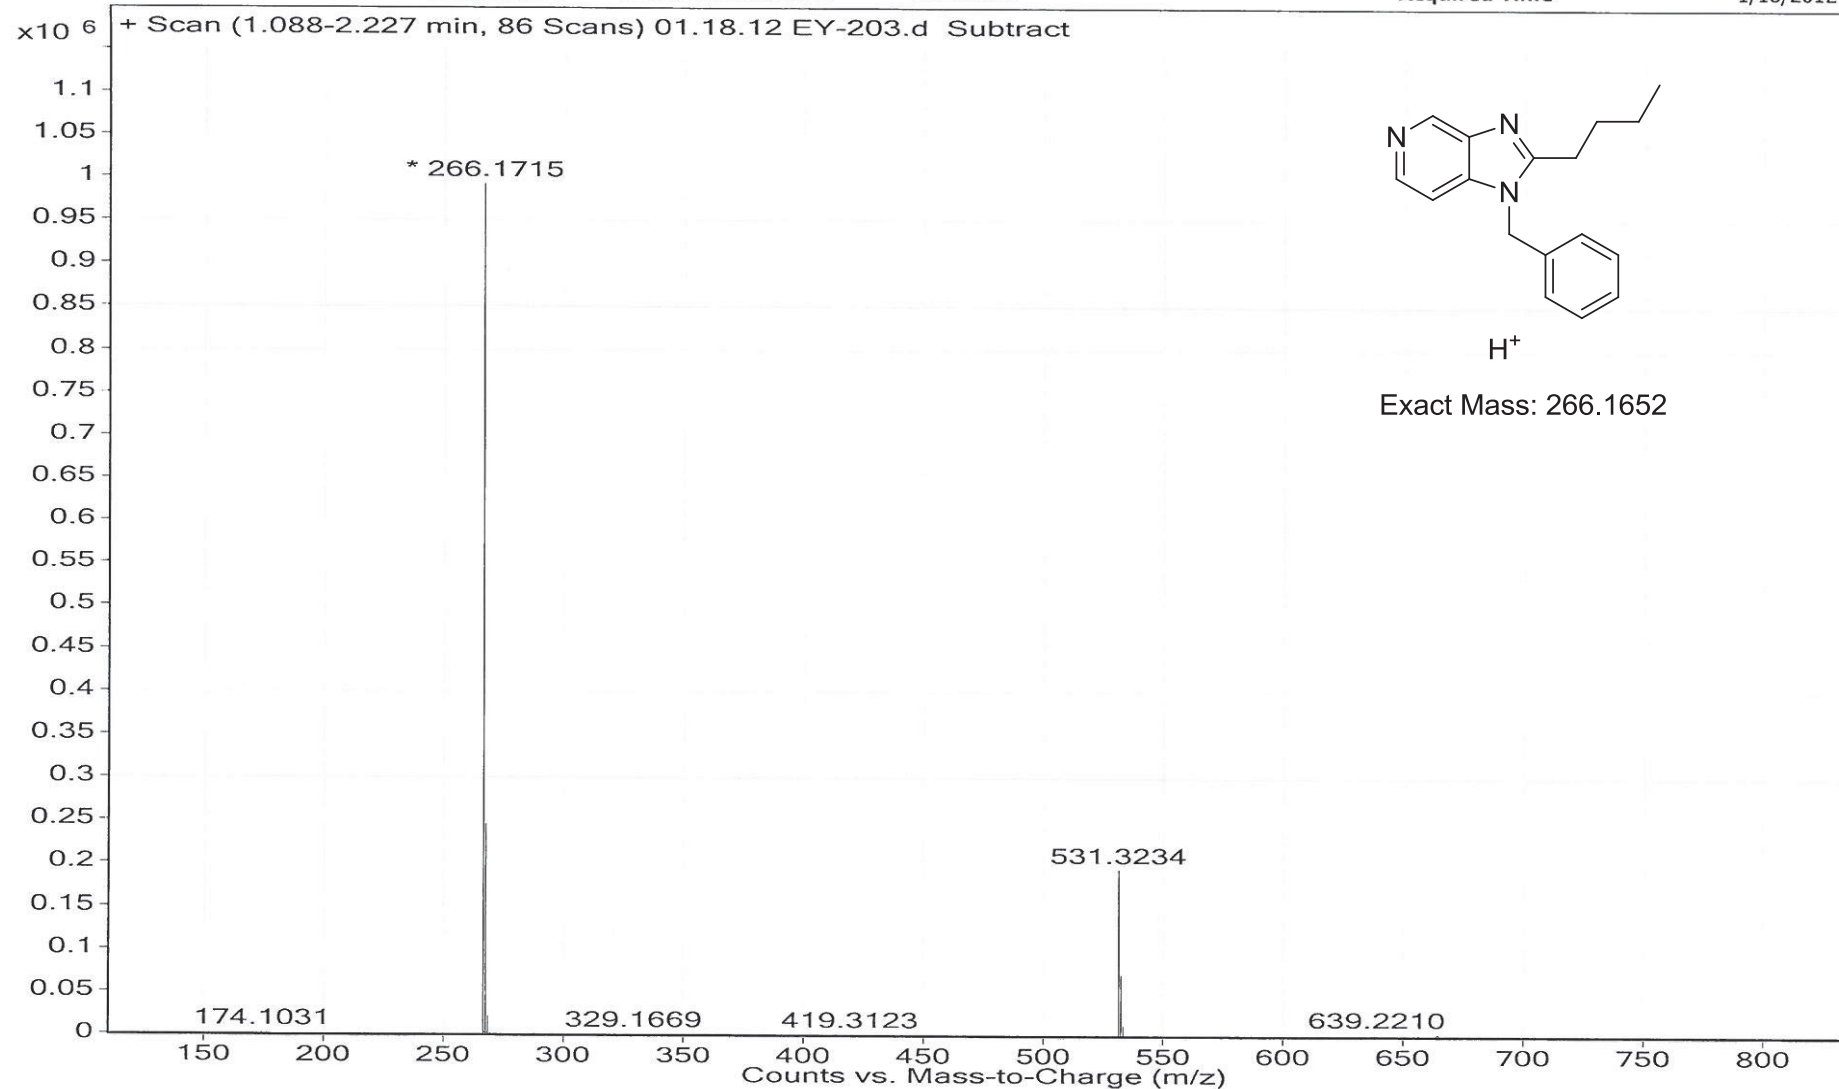

# 4 <sup>1</sup>H NMR

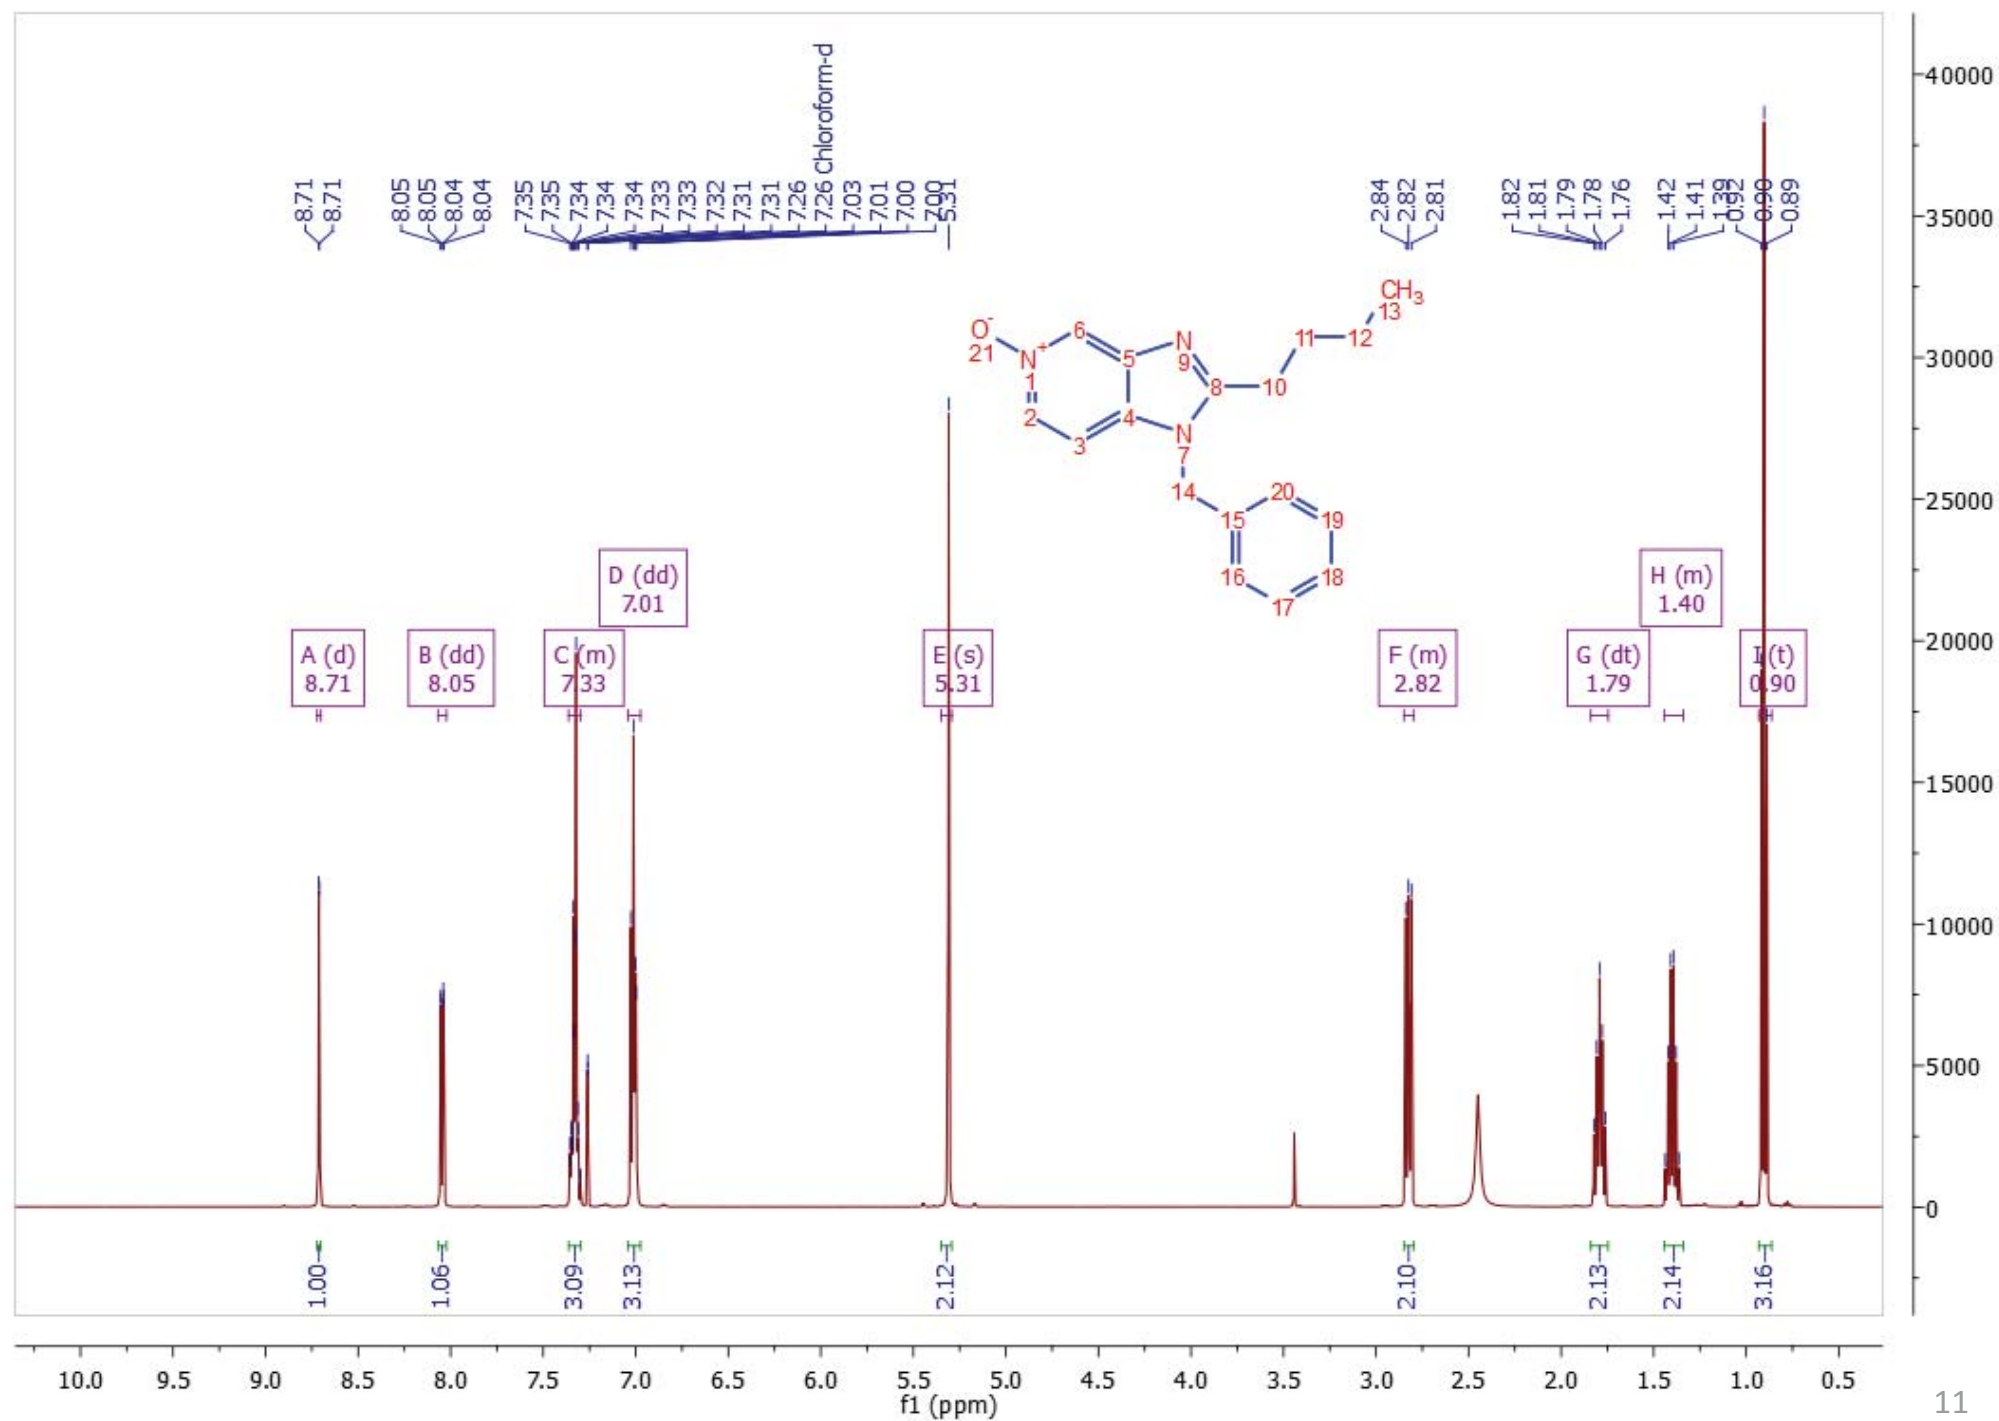



# 4 <sup>13</sup>C NMR

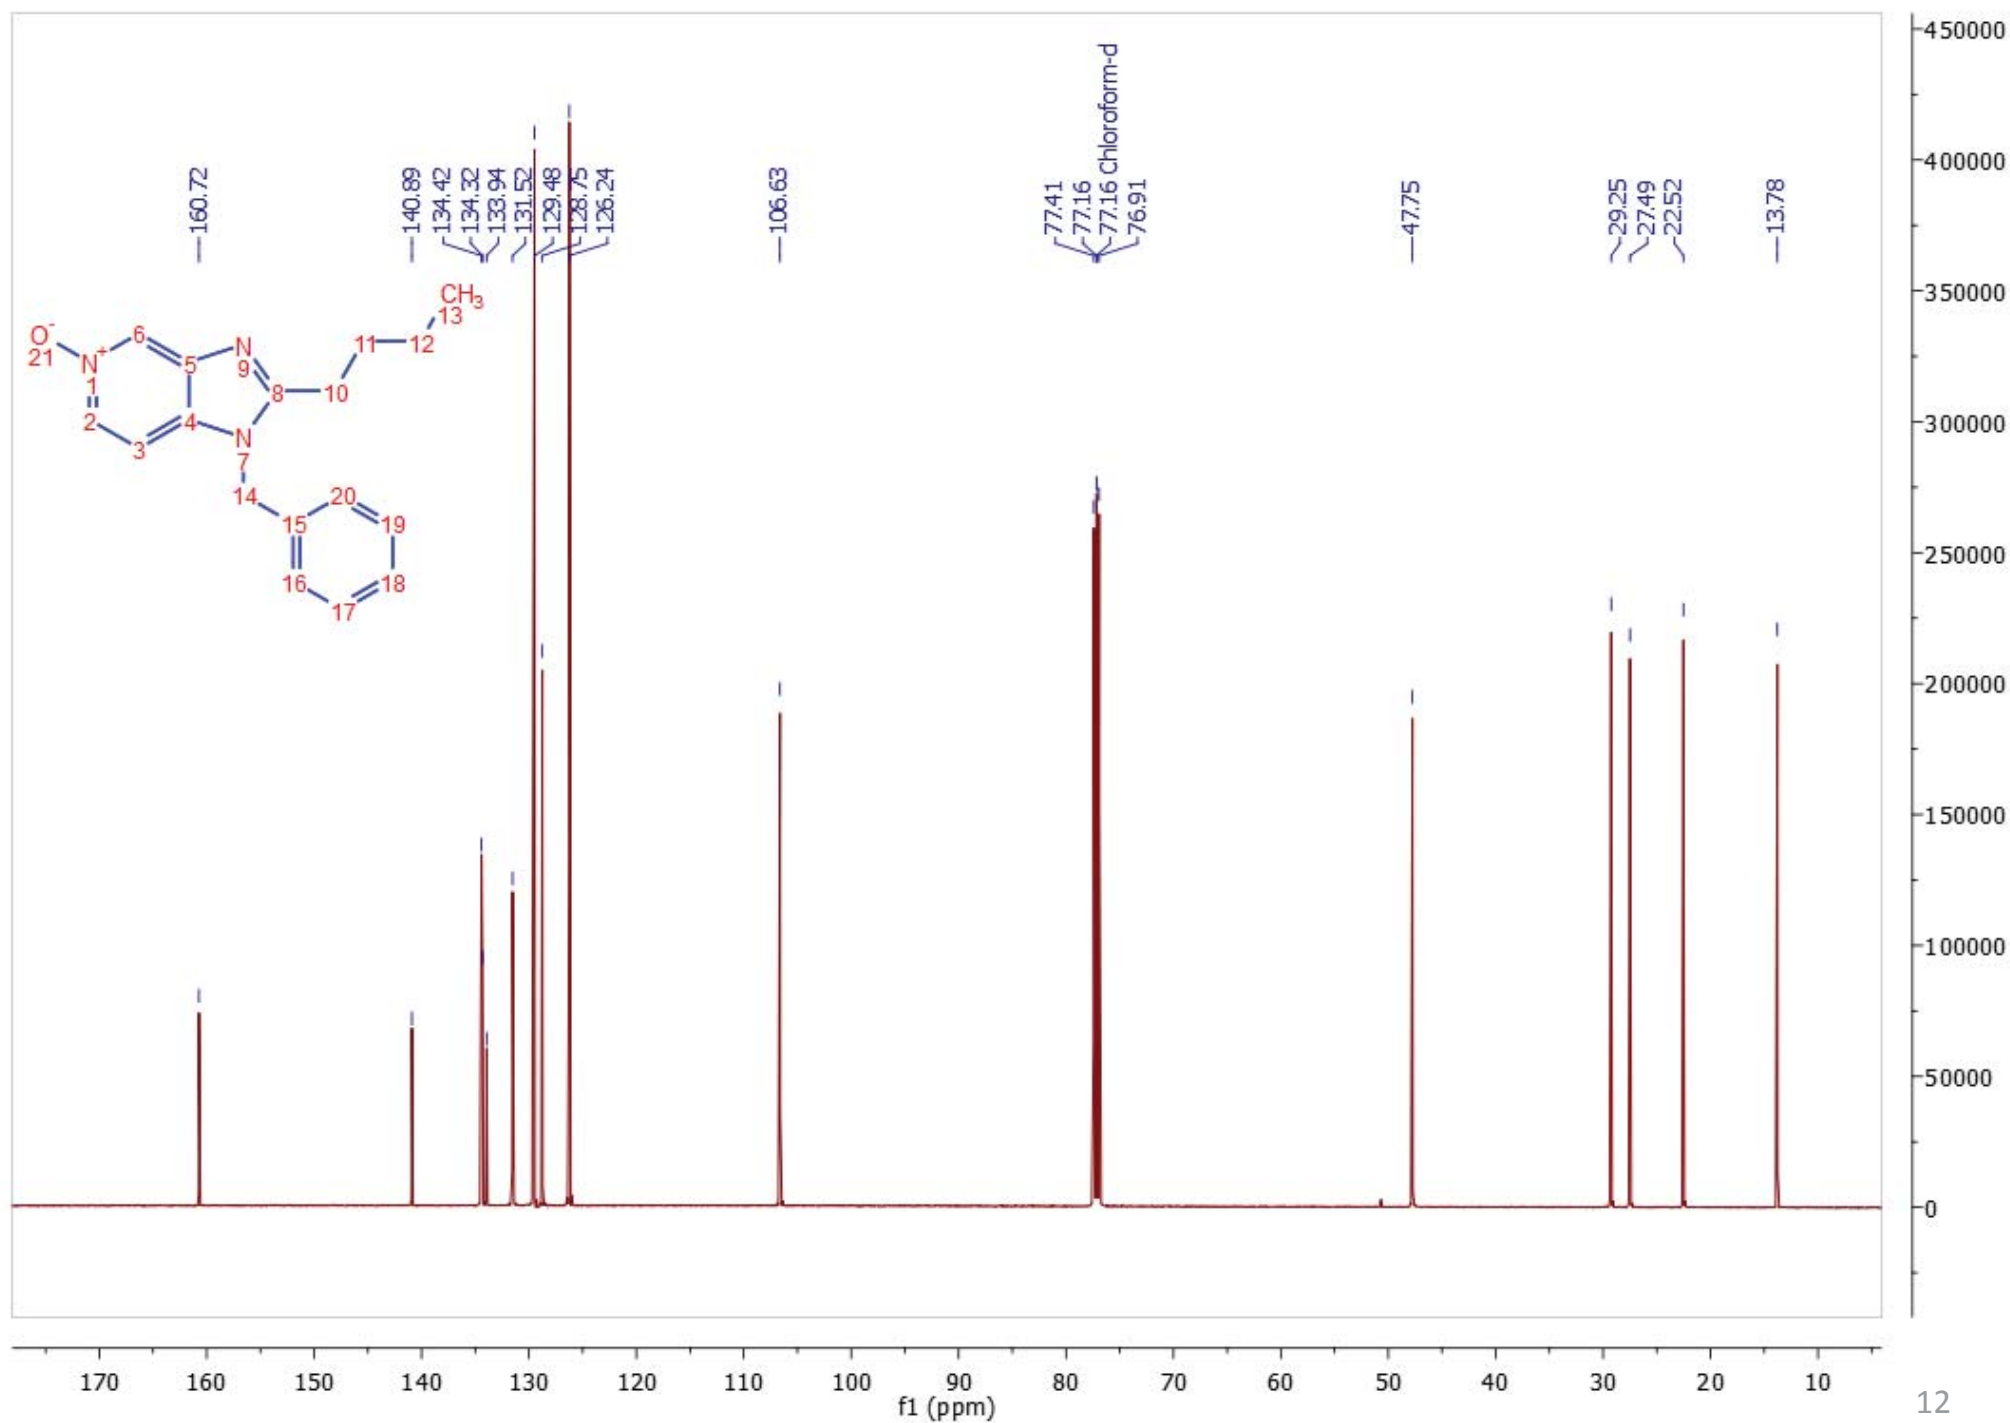



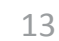

# 5 <sup>13</sup>C NMR

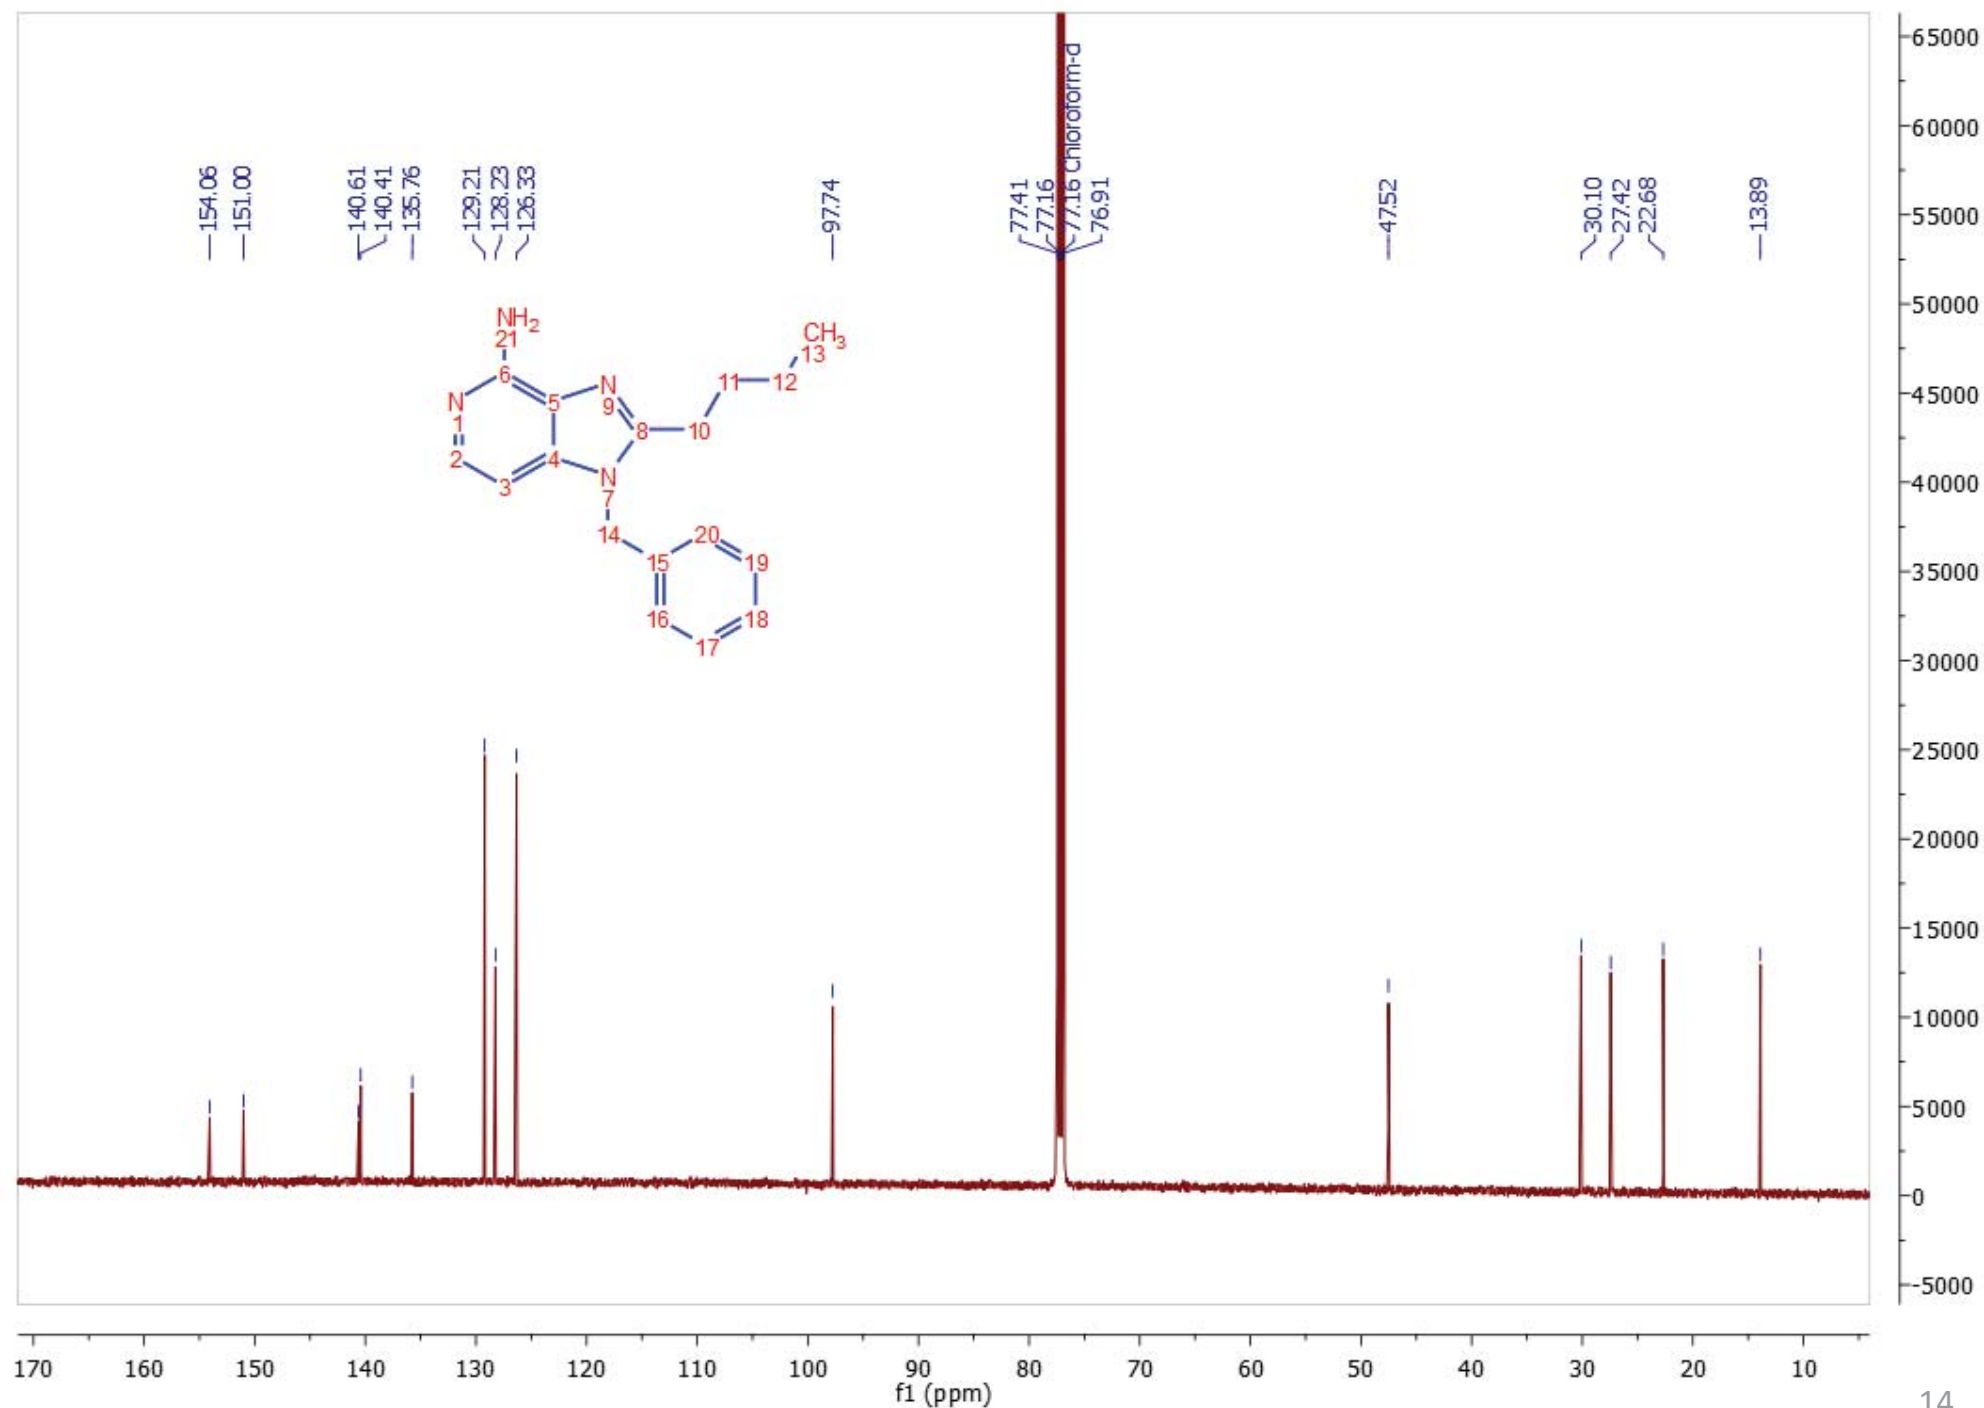

# 5 MS

|               |                      |             |                      |                 |              |                        |                      |
|---------------|----------------------|-------------|----------------------|-----------------|--------------|------------------------|----------------------|
| Sample Name   | 01.20.12 EY-1-206 tu | Position    | Vial 1               | Instrument Name | Instrument 1 | User Name              |                      |
| Inj Vol       | -1                   | InjPosition |                      | SampleType      | Sample       | IRM Calibration Status | Success              |
| Data Filename | 01.20.12 EY-1-206 tu | ACQ Method  | Water-ACN Infusion M | Comment         |              | Acquired Time          | 1/20/2012 1:32:27 PM |

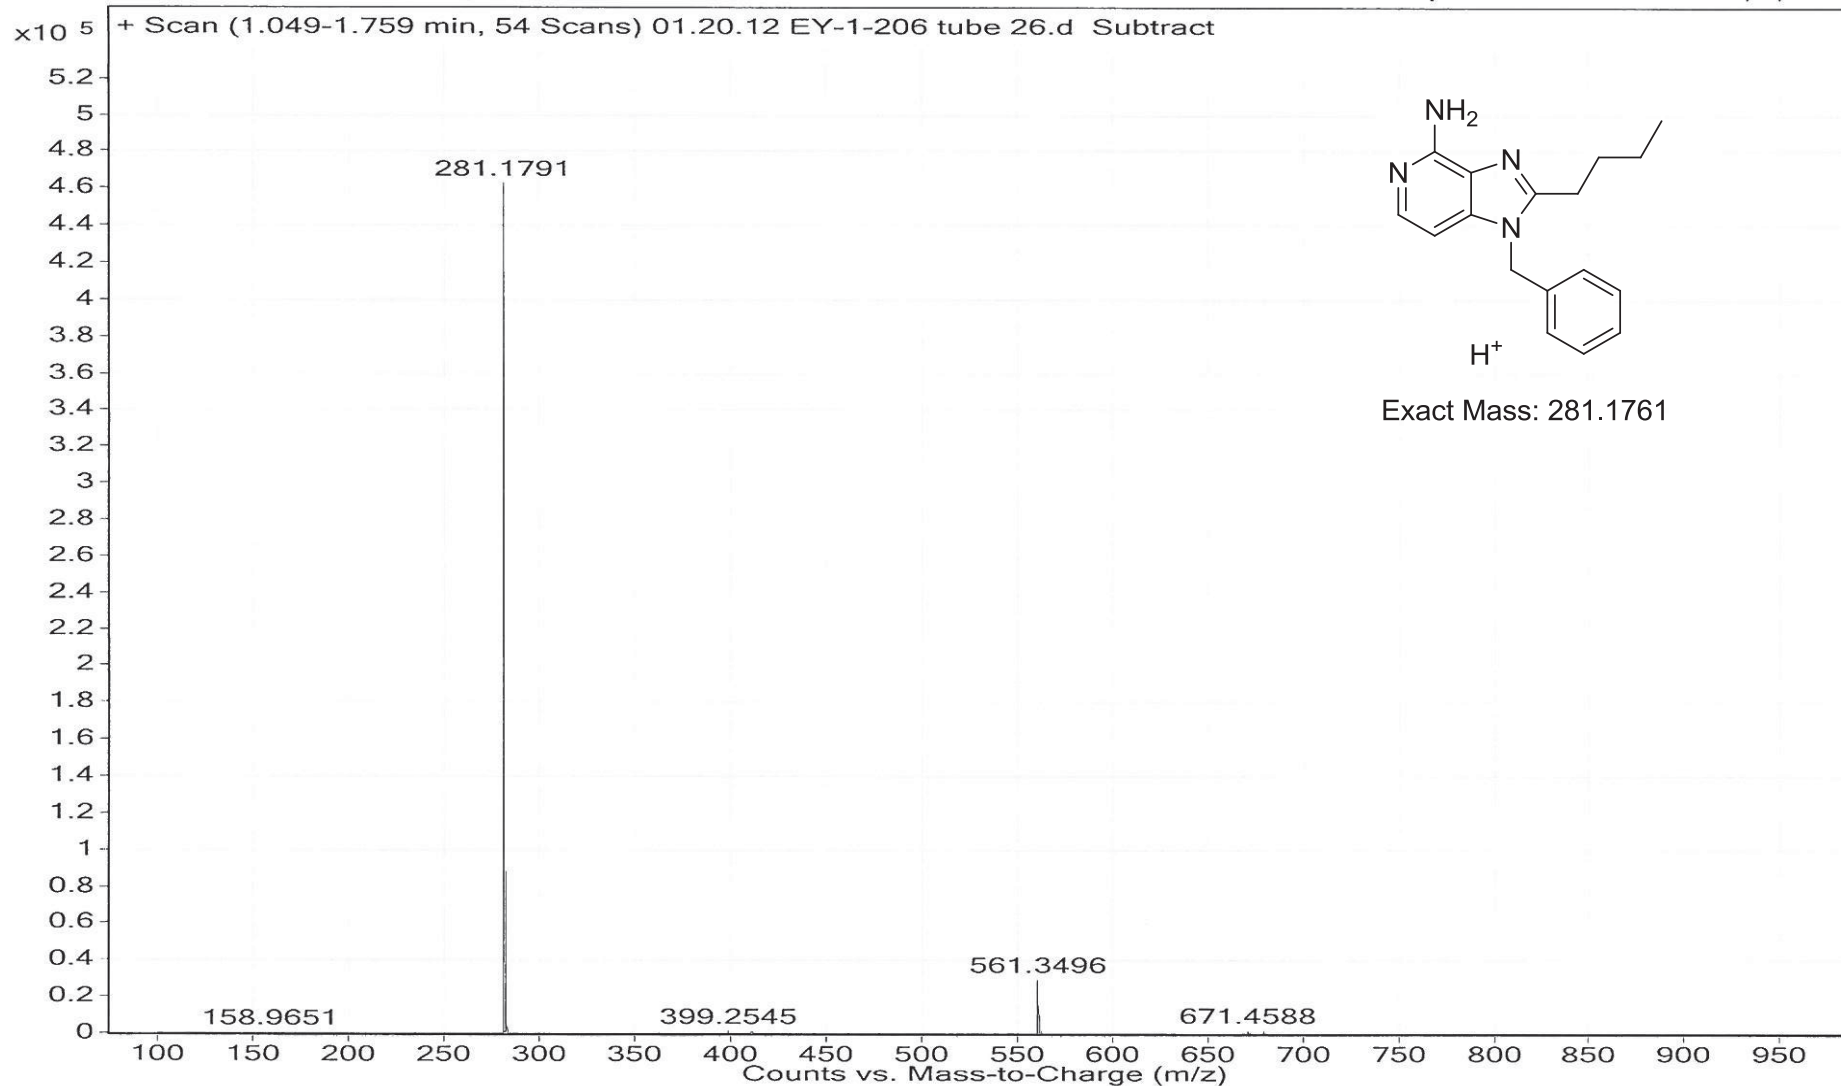

## 5 LC-MS

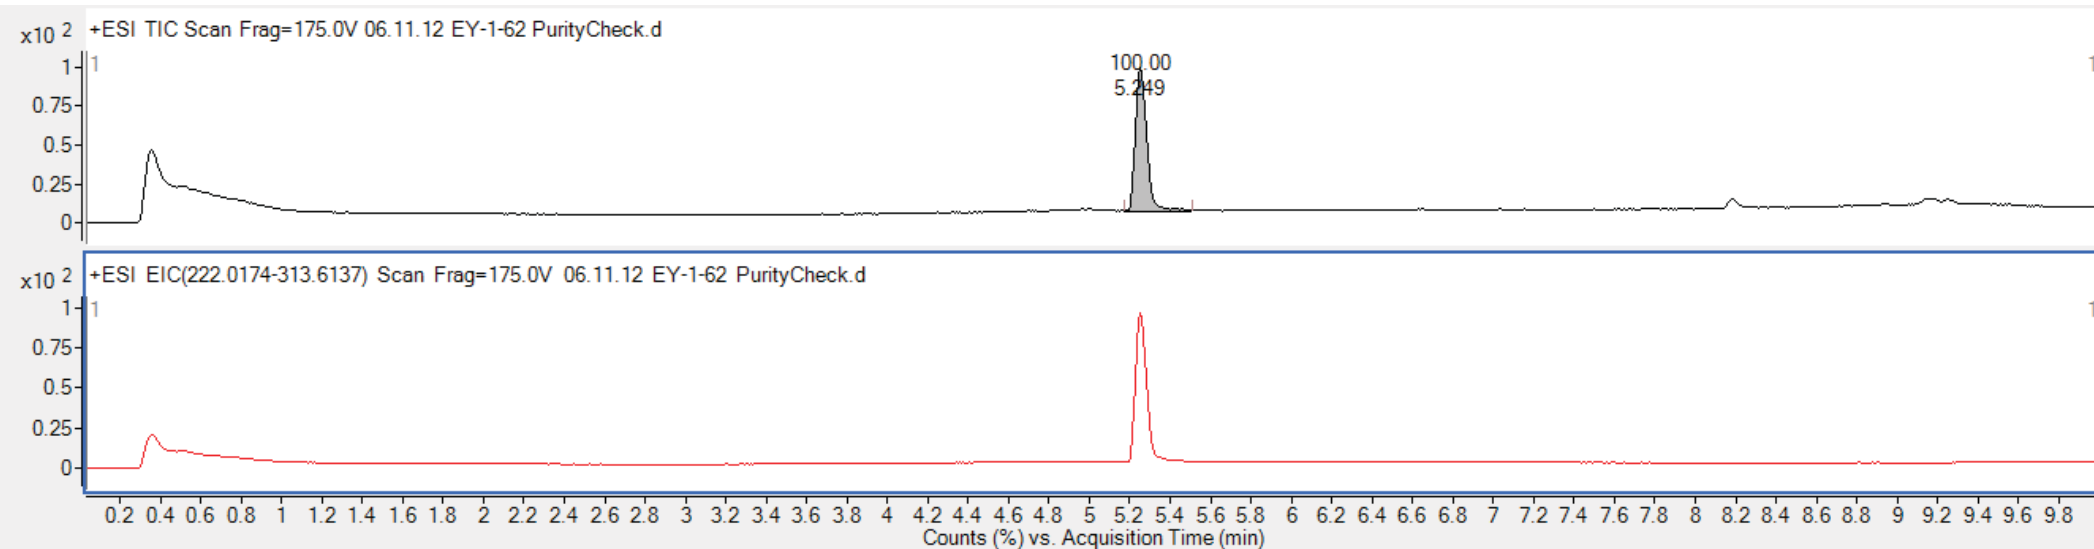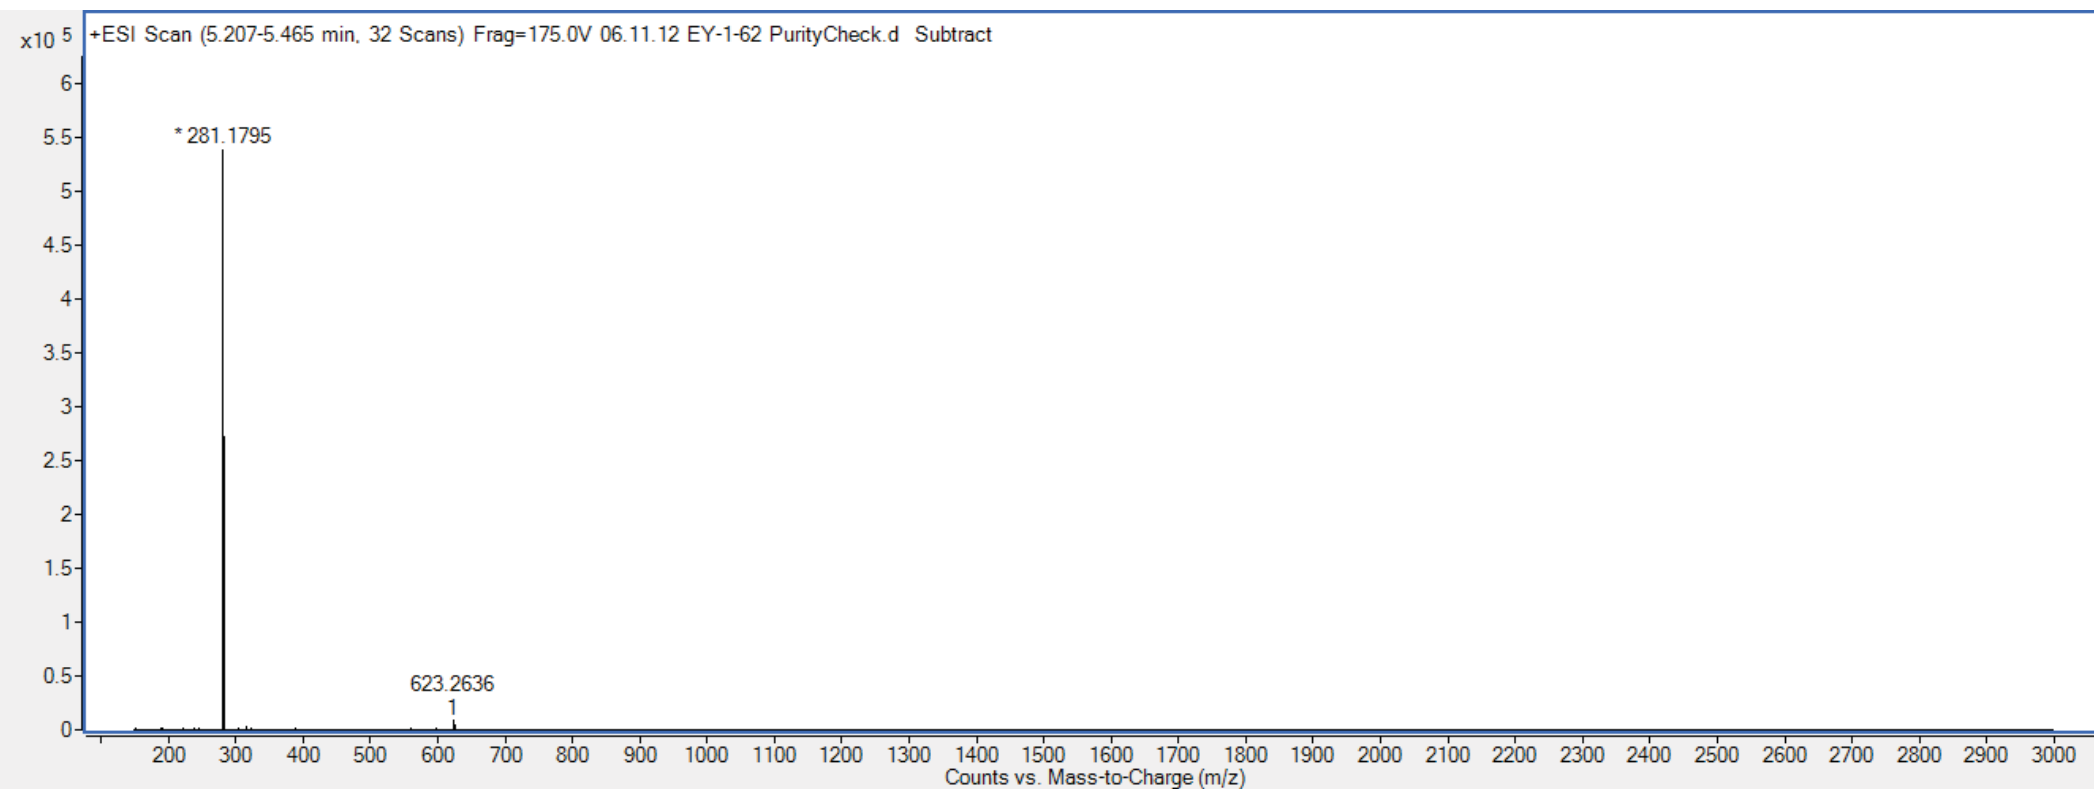

# 6a <sup>1</sup>H NMR

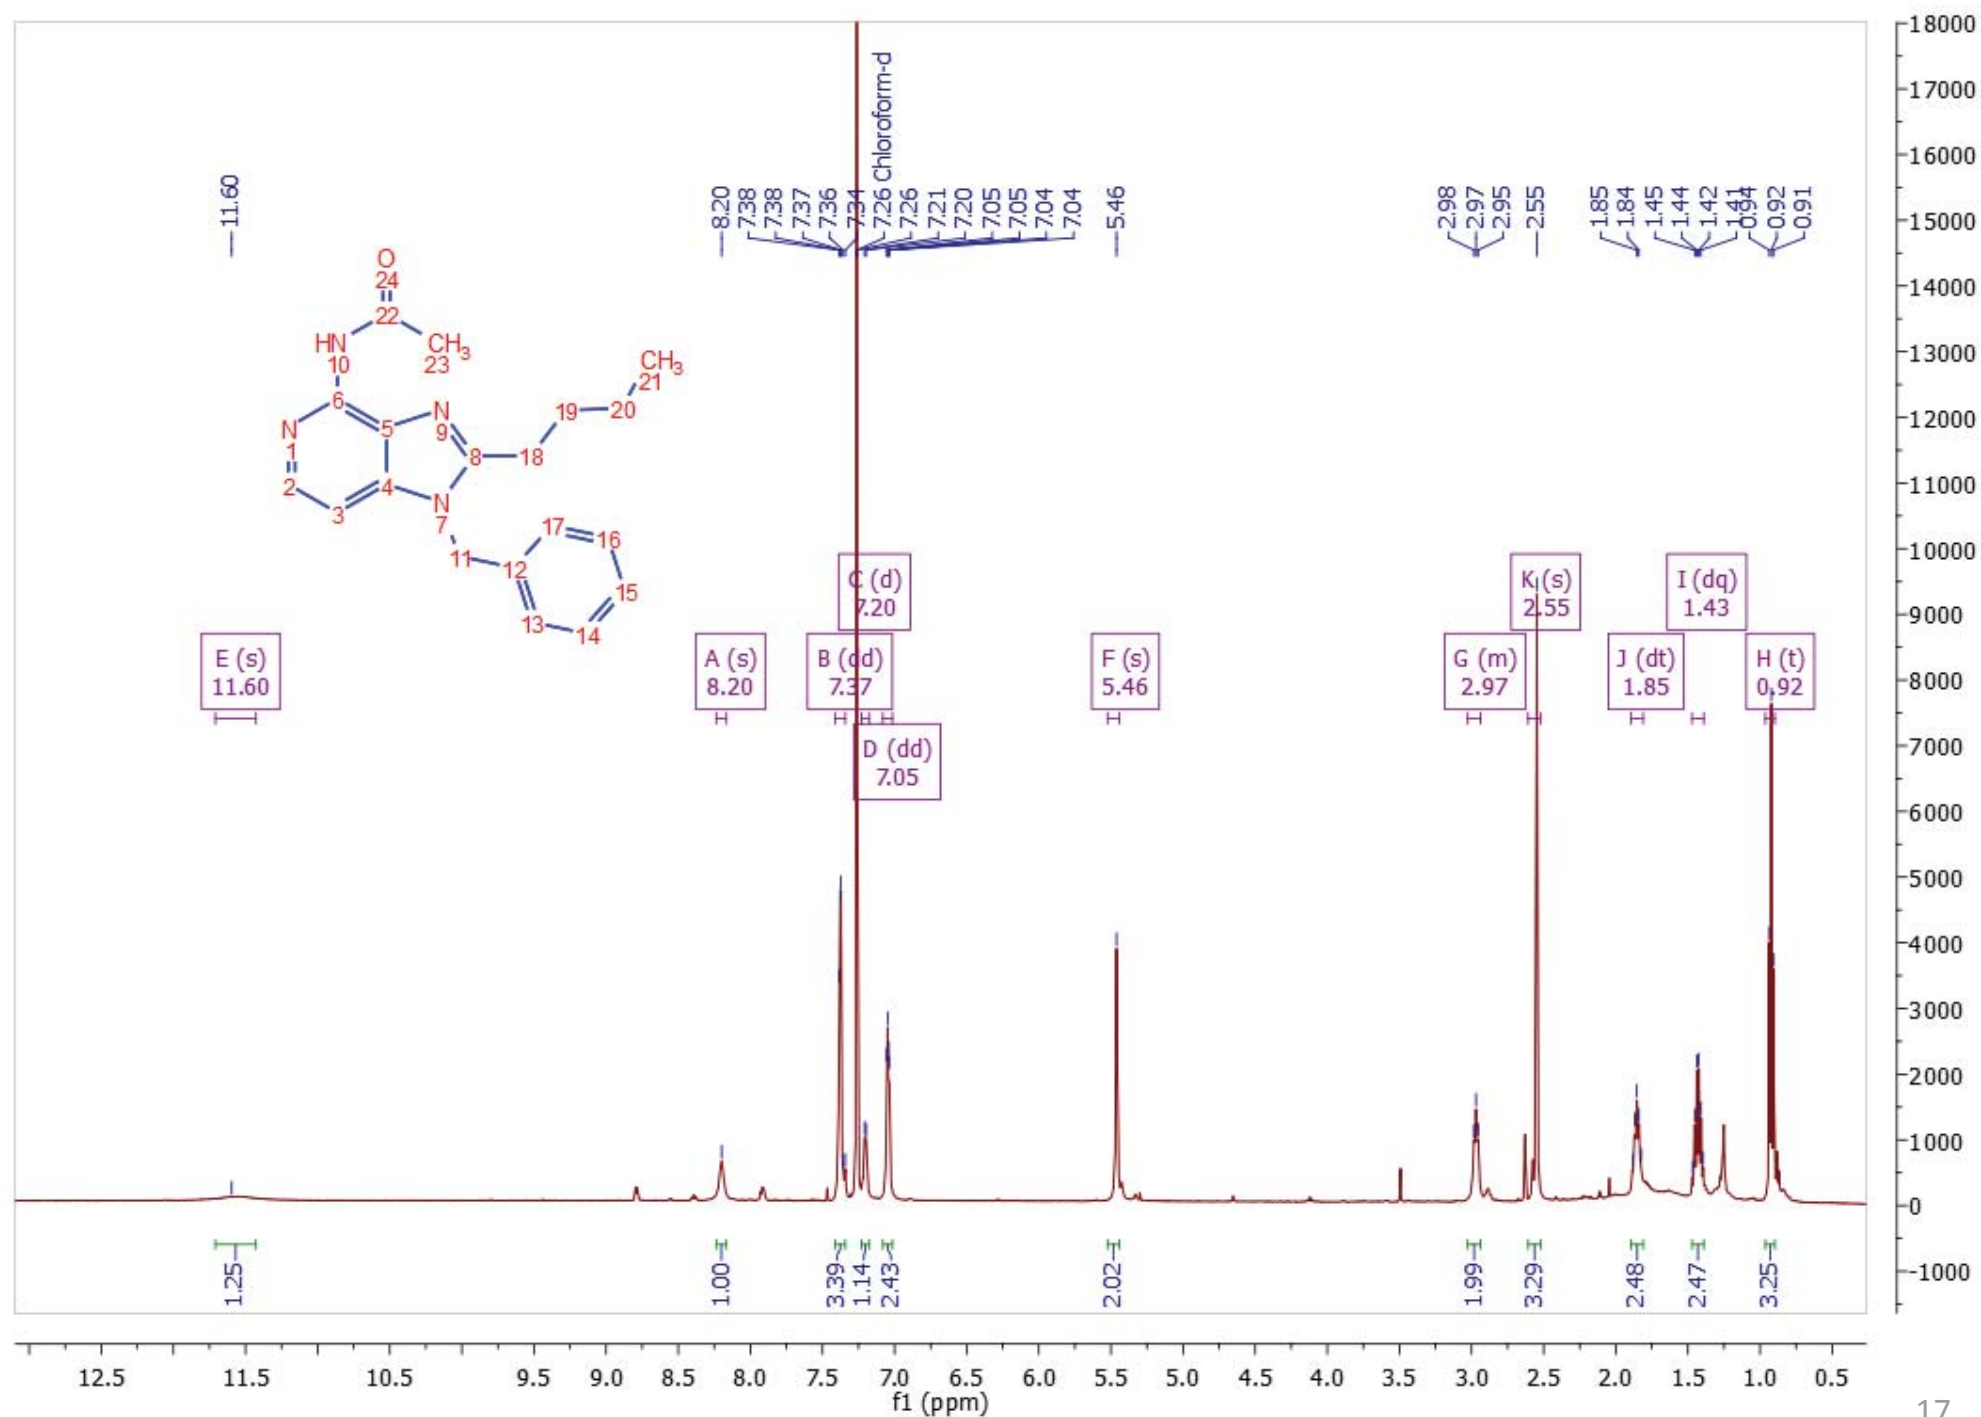

# 6a <sup>13</sup>C NMR

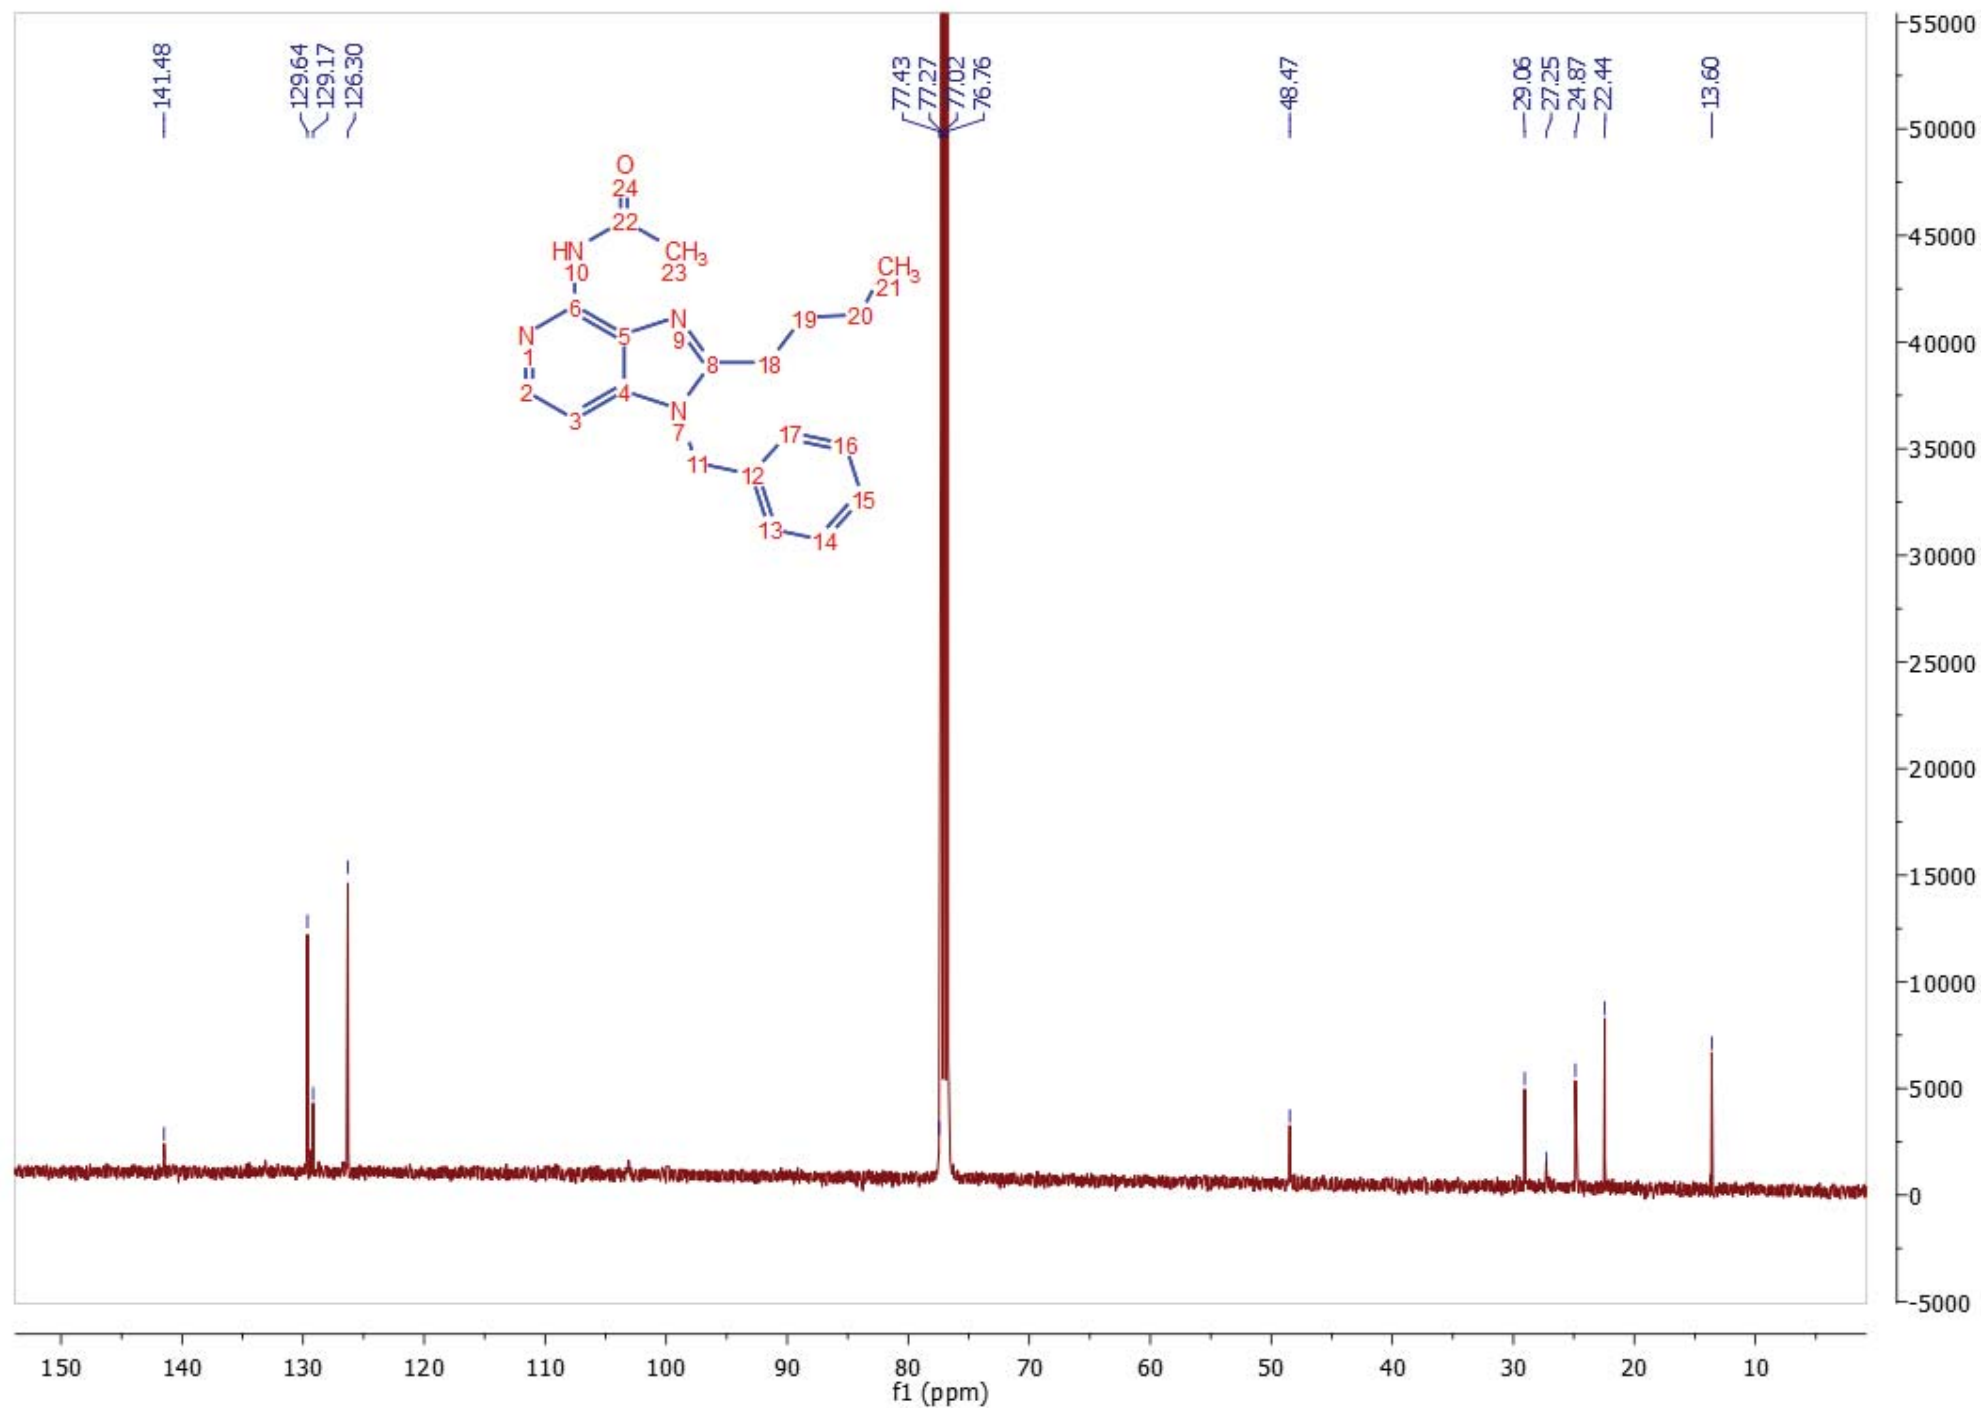

## 6a MS

|               |                      |             |                      |                 |              |                        |                     |
|---------------|----------------------|-------------|----------------------|-----------------|--------------|------------------------|---------------------|
| Sample Name   | 02.06.12 EY-1-233 tu | Position    | Vial 2               | Instrument Name | Instrument 1 | User Name              |                     |
| Inj Vol       | -1                   | InjPosition |                      | SampleType      | Sample       | IRM Calibration Status | Success             |
| Data Filename | 02.06.12 EY-1-233 tu | ACQ Method  | Water-ACN Infusion M | Comment         |              | Acquired Time          | 2/6/2012 3:47:24 PM |

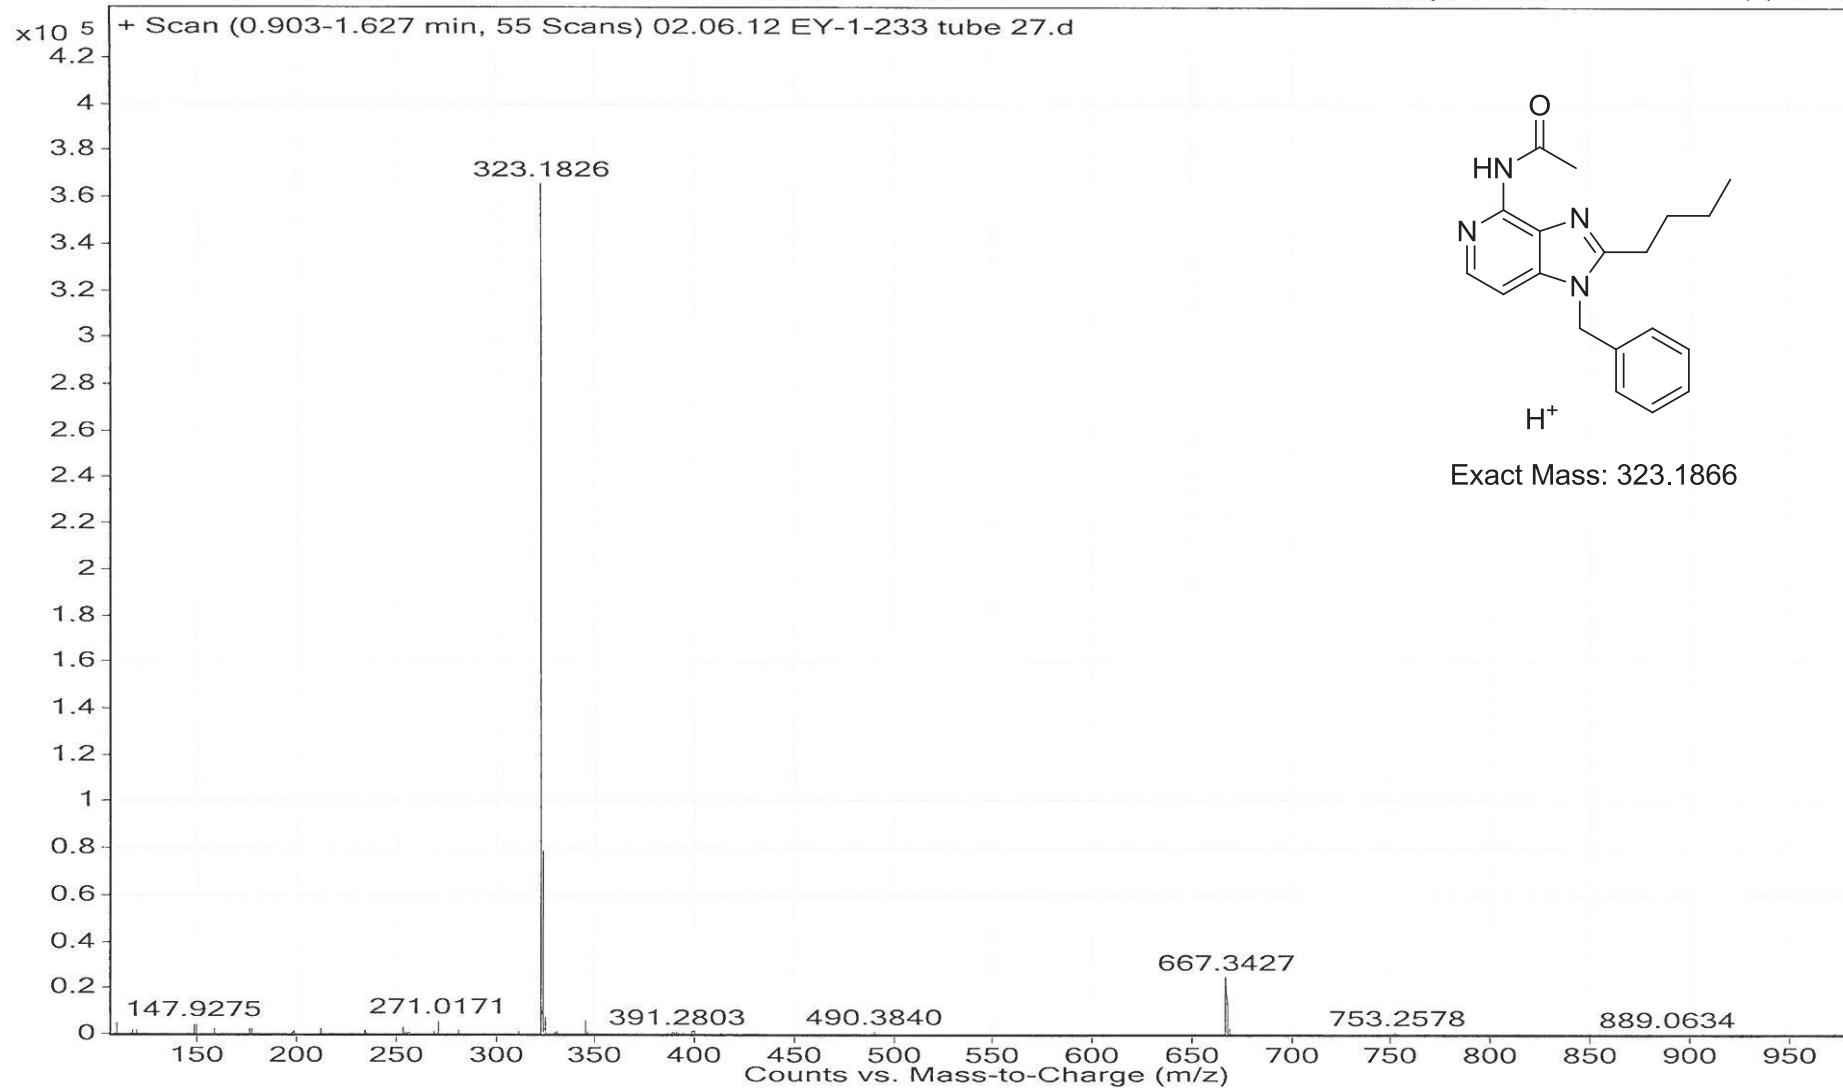

## 6a LC-MS

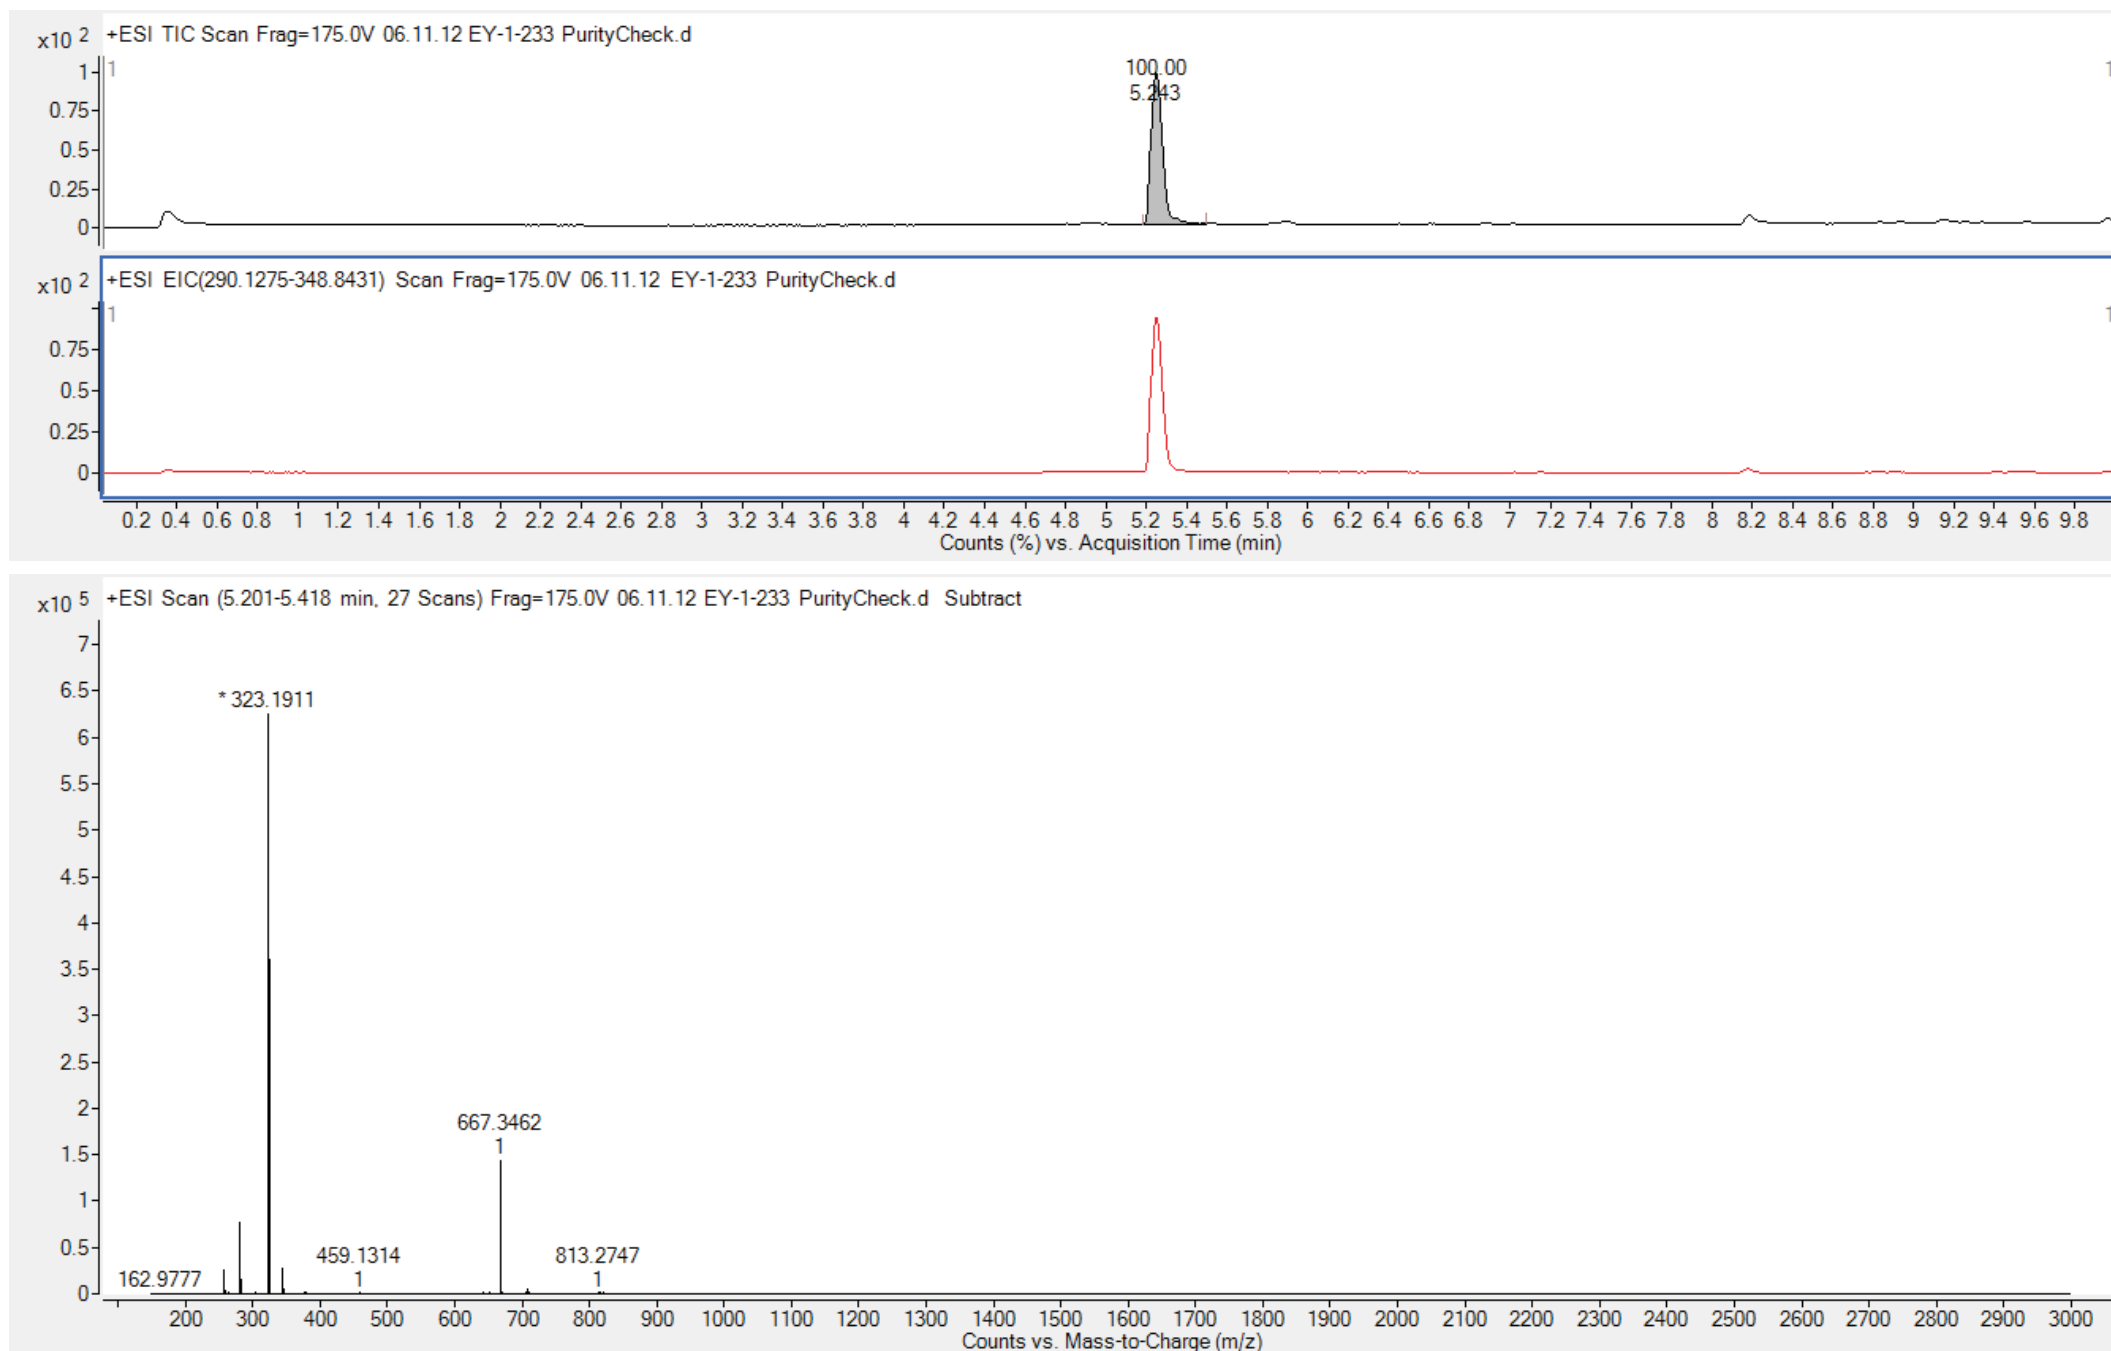



# 6b <sup>1</sup>H NMR

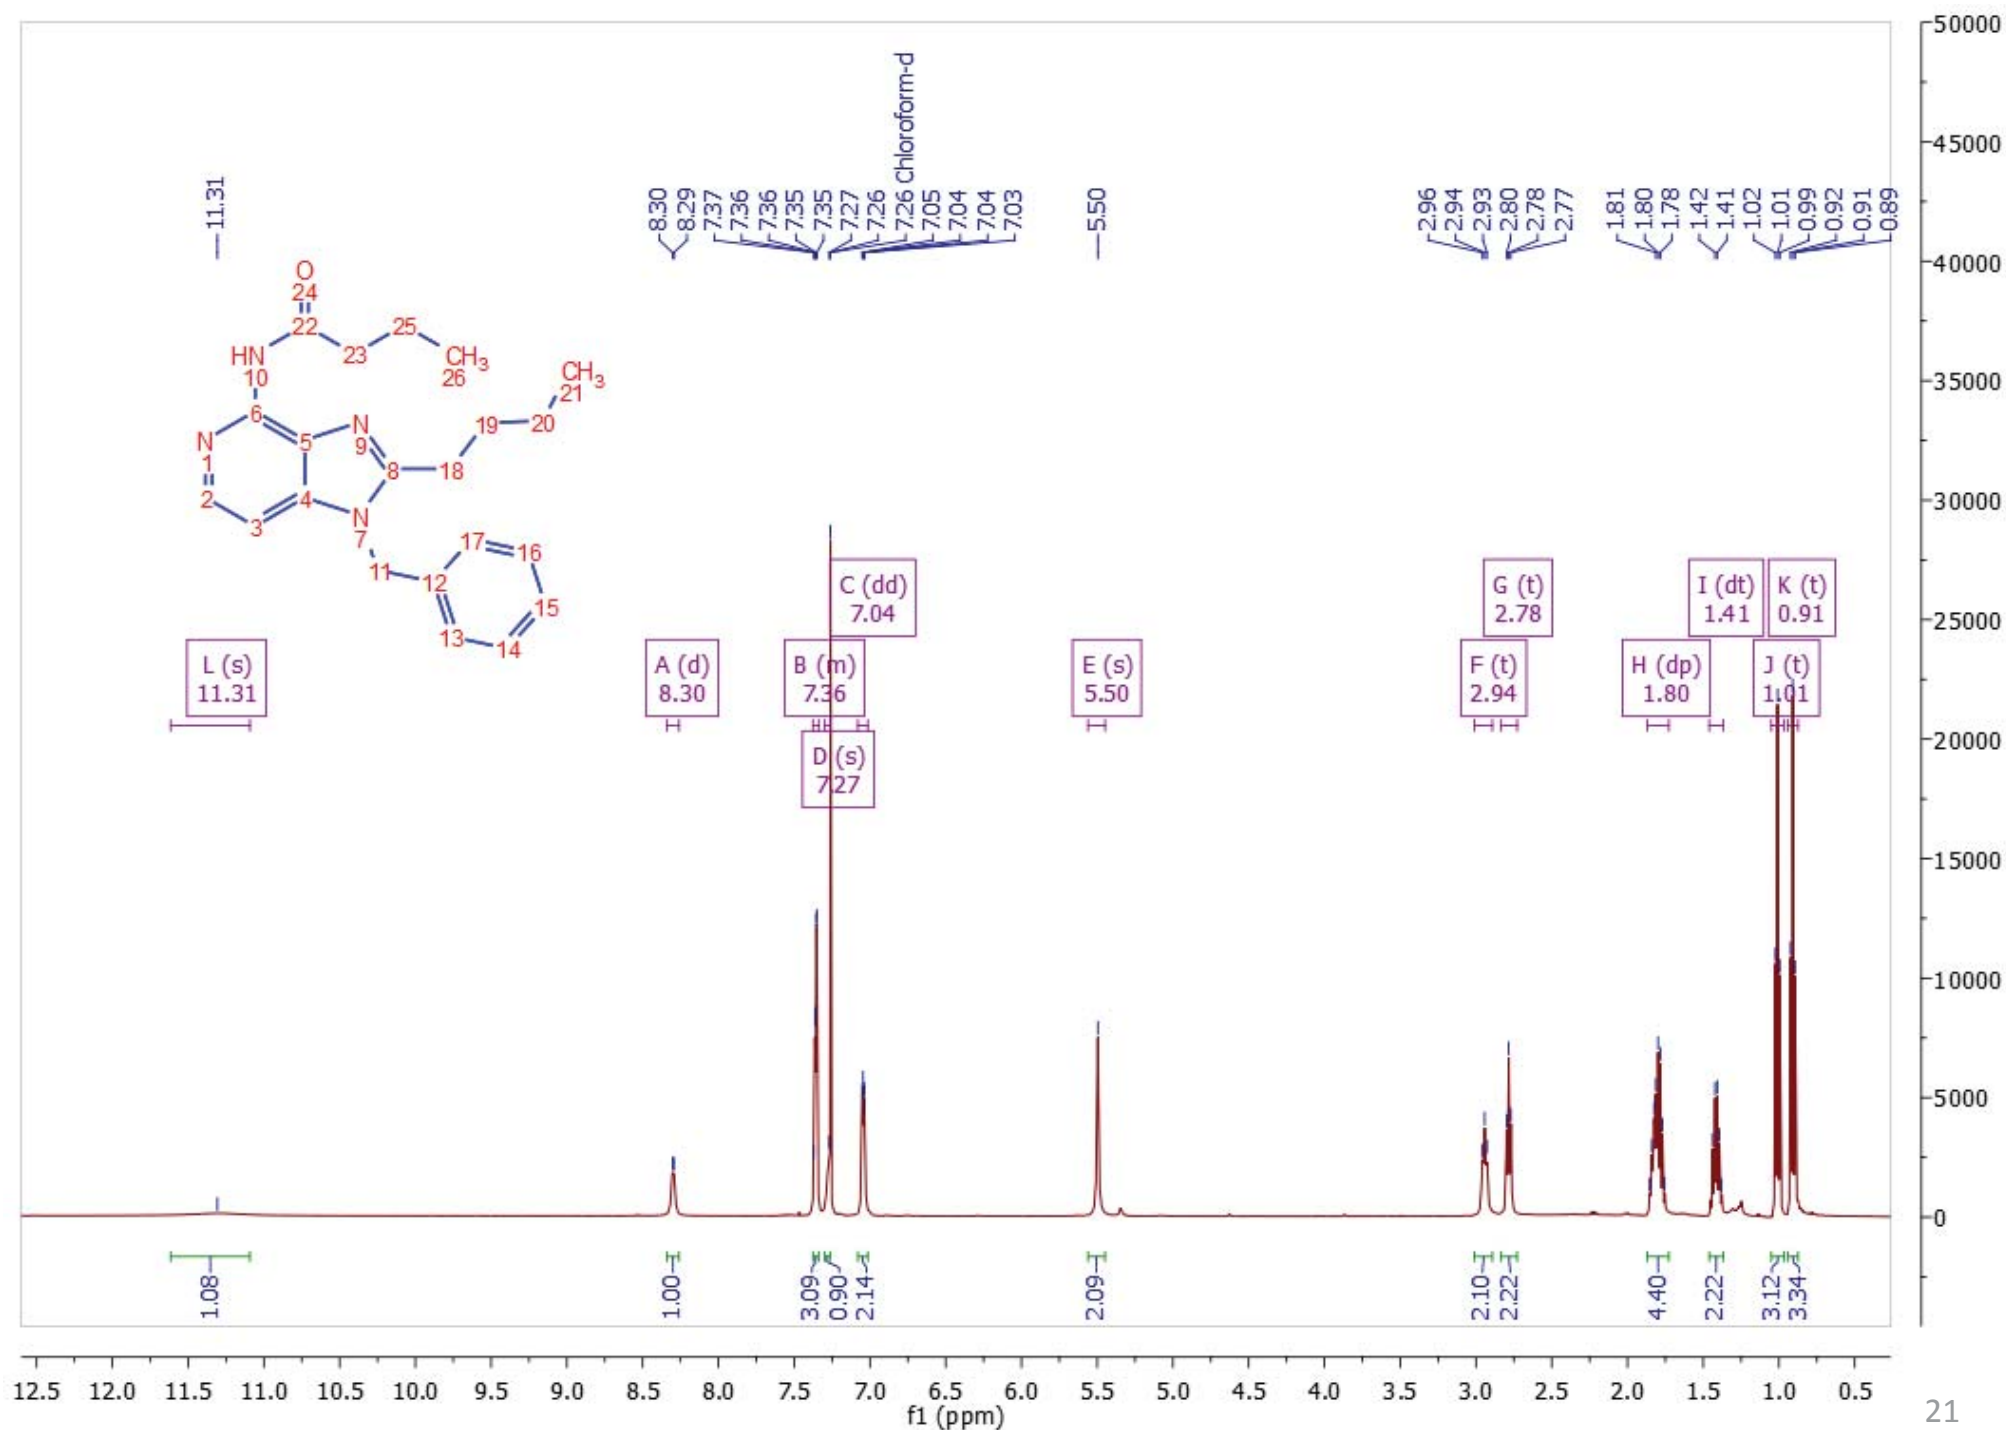

# 6b <sup>13</sup>C NMR

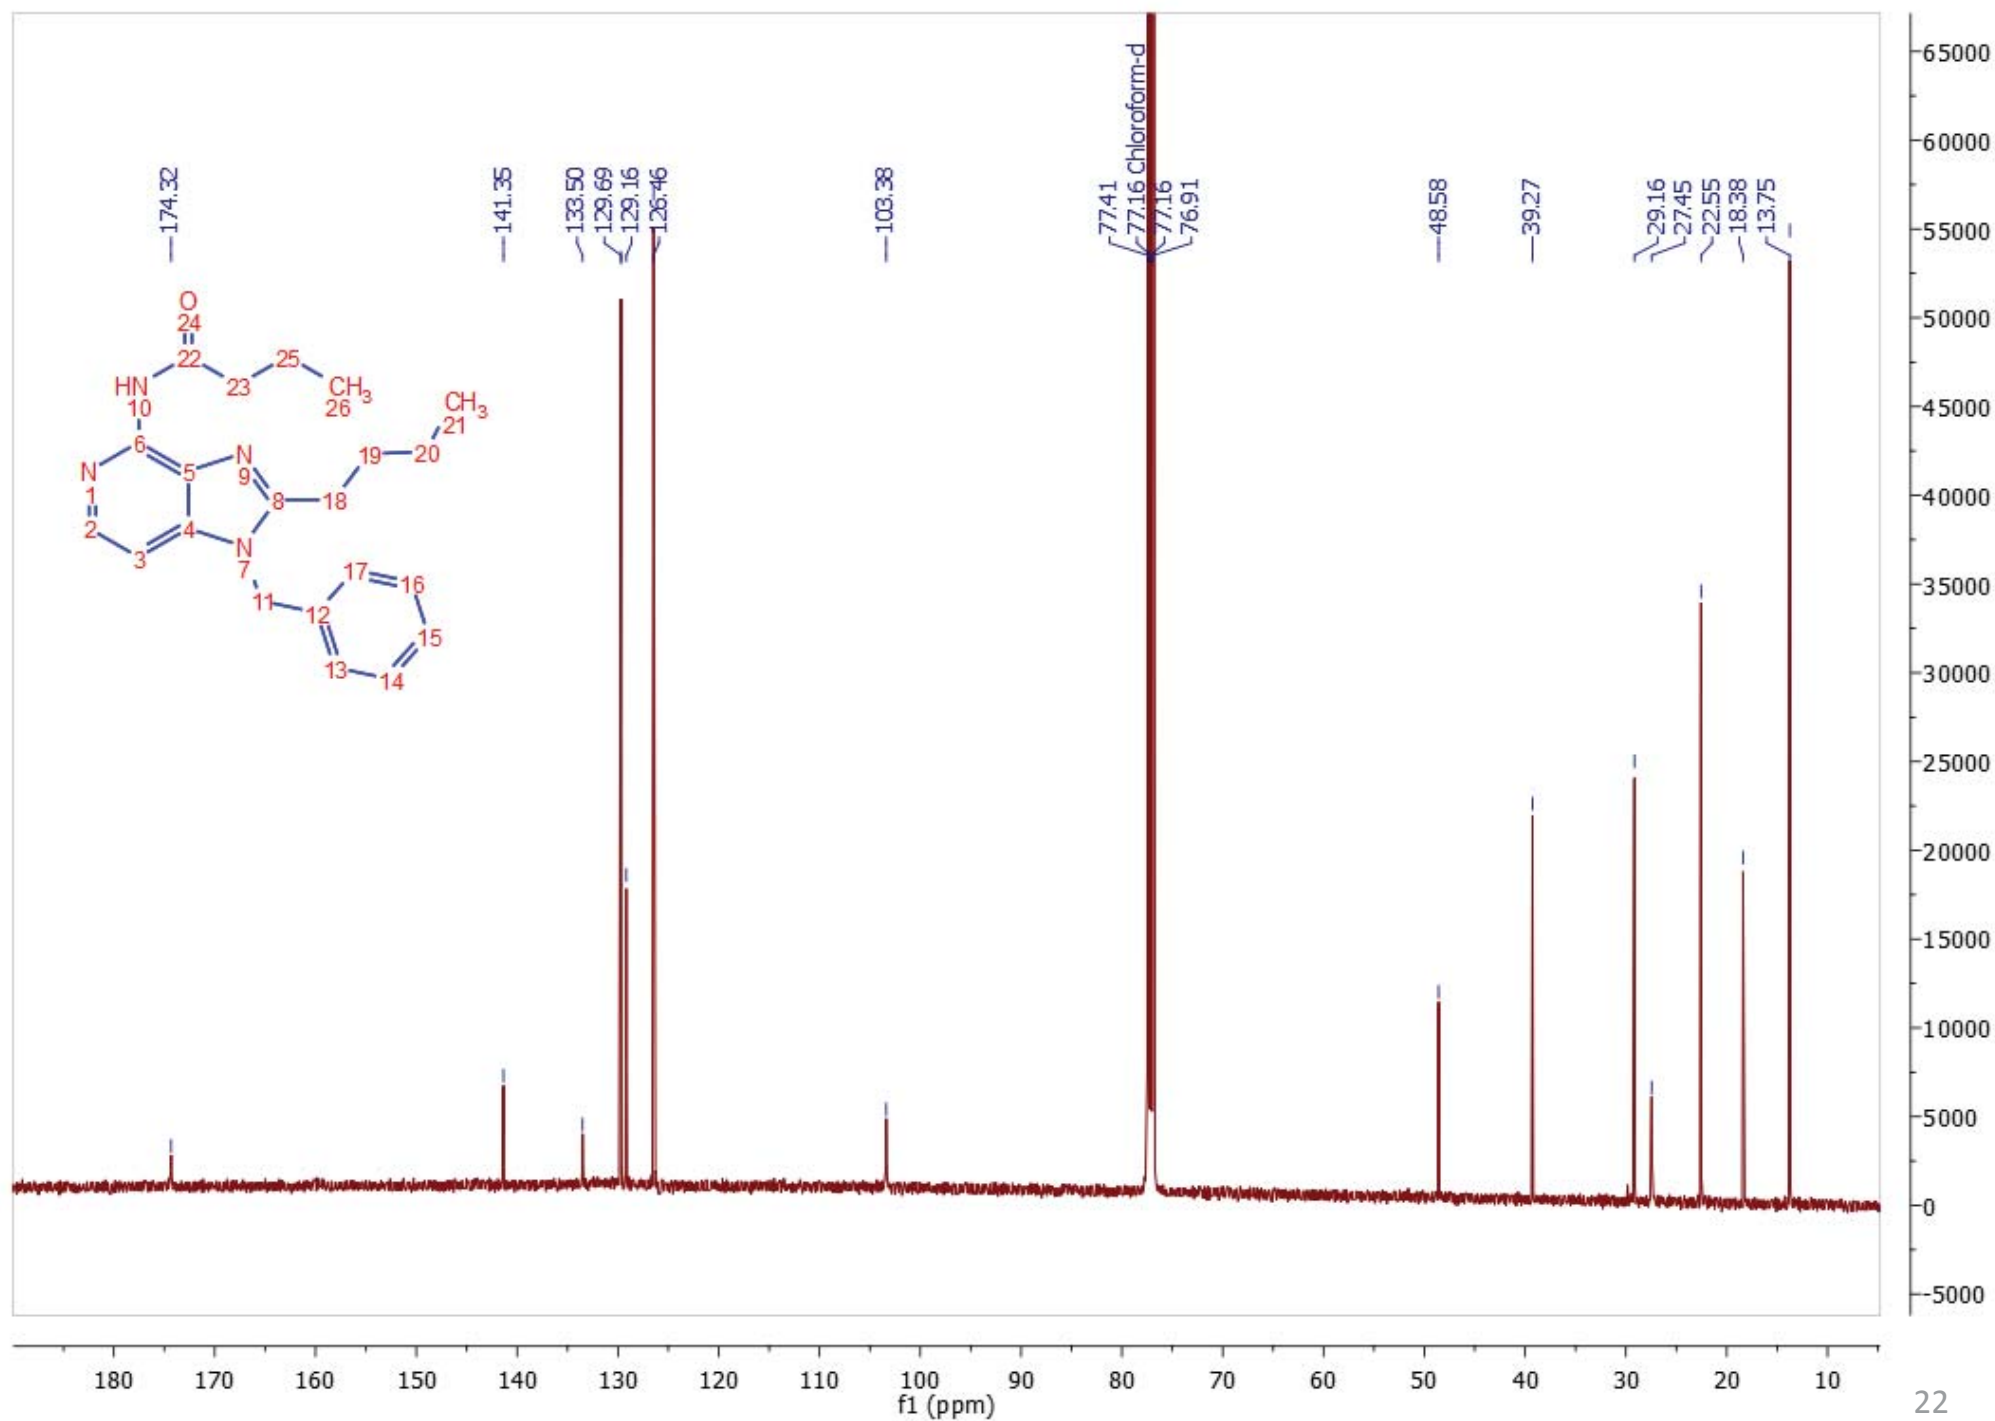

6b MS

|               |                      |             |                      |                 |              |                        |                      |
|---------------|----------------------|-------------|----------------------|-----------------|--------------|------------------------|----------------------|
| Sample Name   | 02.03.12 EY-1-229 tu | Position    | Vial 2               | Instrument Name | Instrument 1 | User Name              |                      |
| Inj Vol       | -1                   | InjPosition |                      | SampleType      | Sample       | IRM Calibration Status | Success              |
| Data Filename | 02.03.12 EY-1-229 tu | ACQ Method  | Water-ACN Infusion M | Comment         |              | Acquired Time          | 2/3/2012 12:57:06 PM |

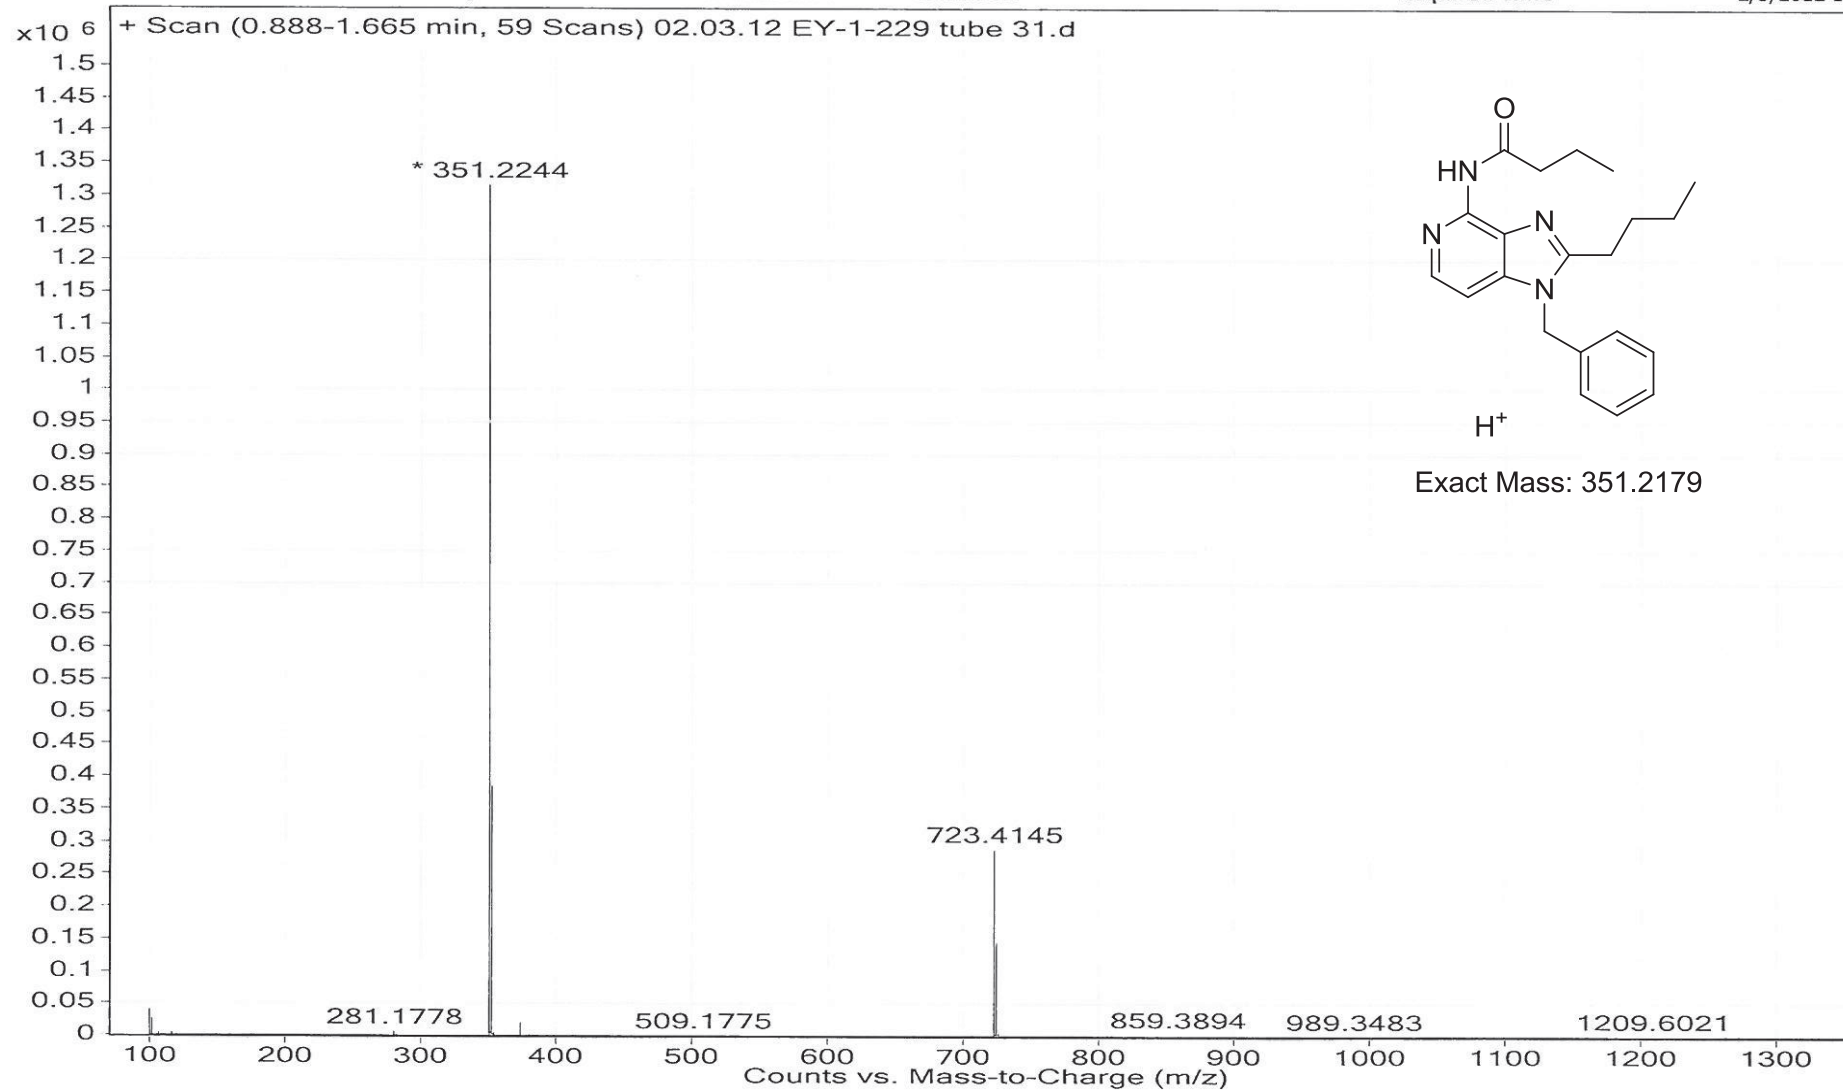

## 6b LC-MS

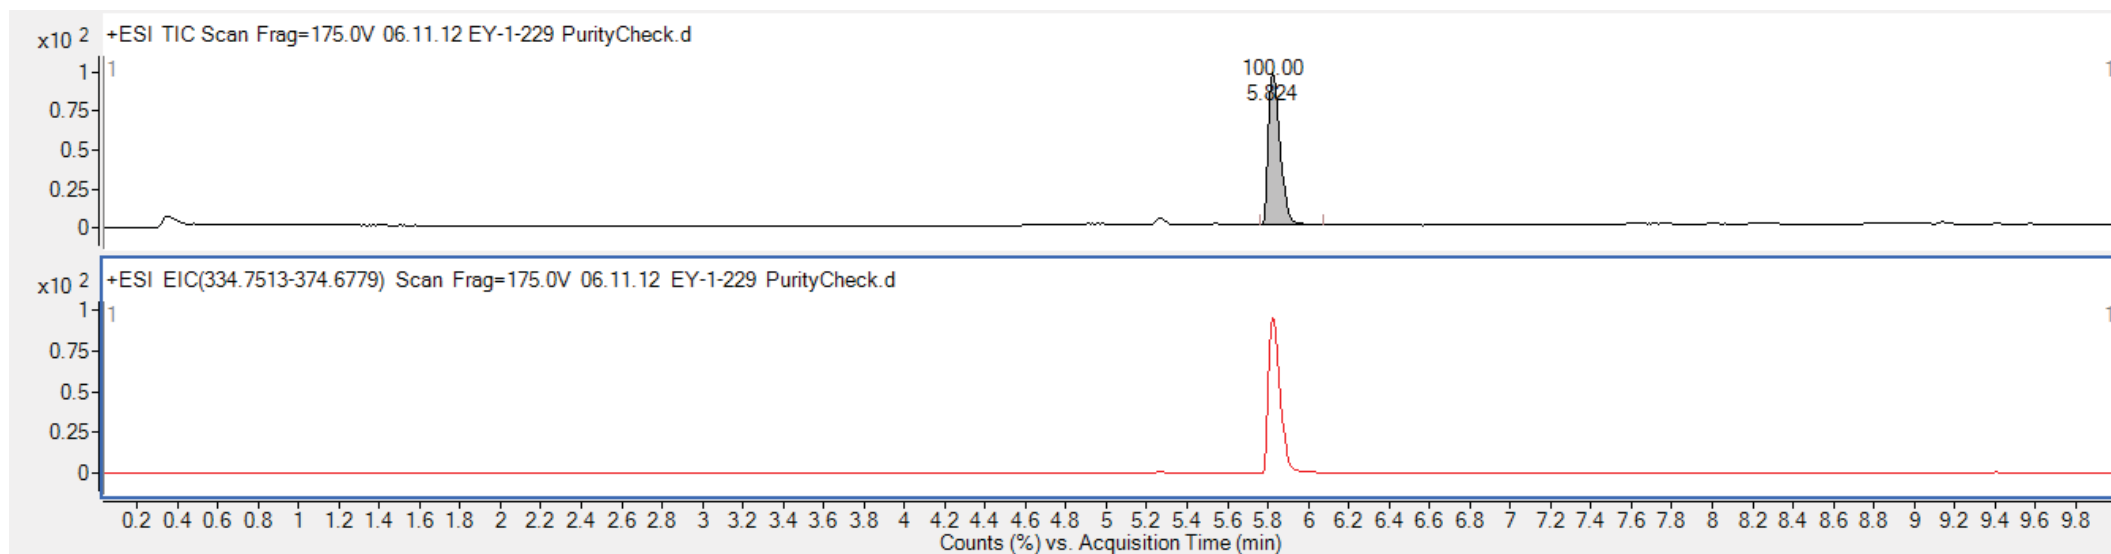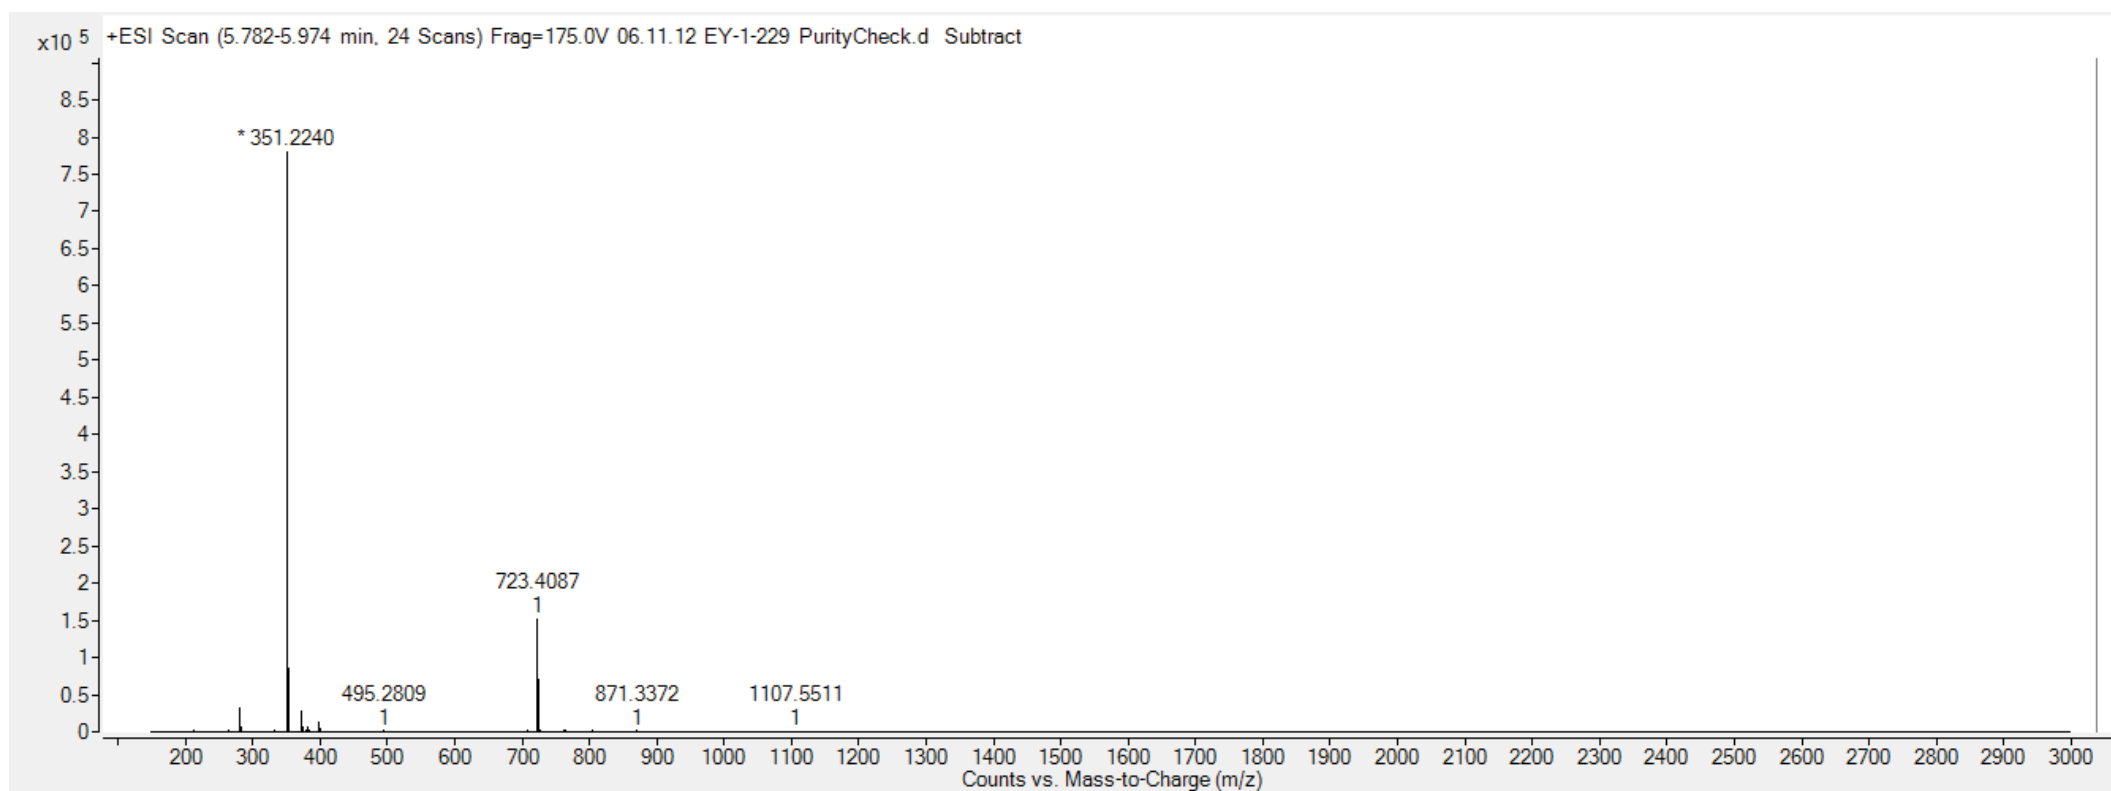

# 10 $^1\text{H}$ NMR

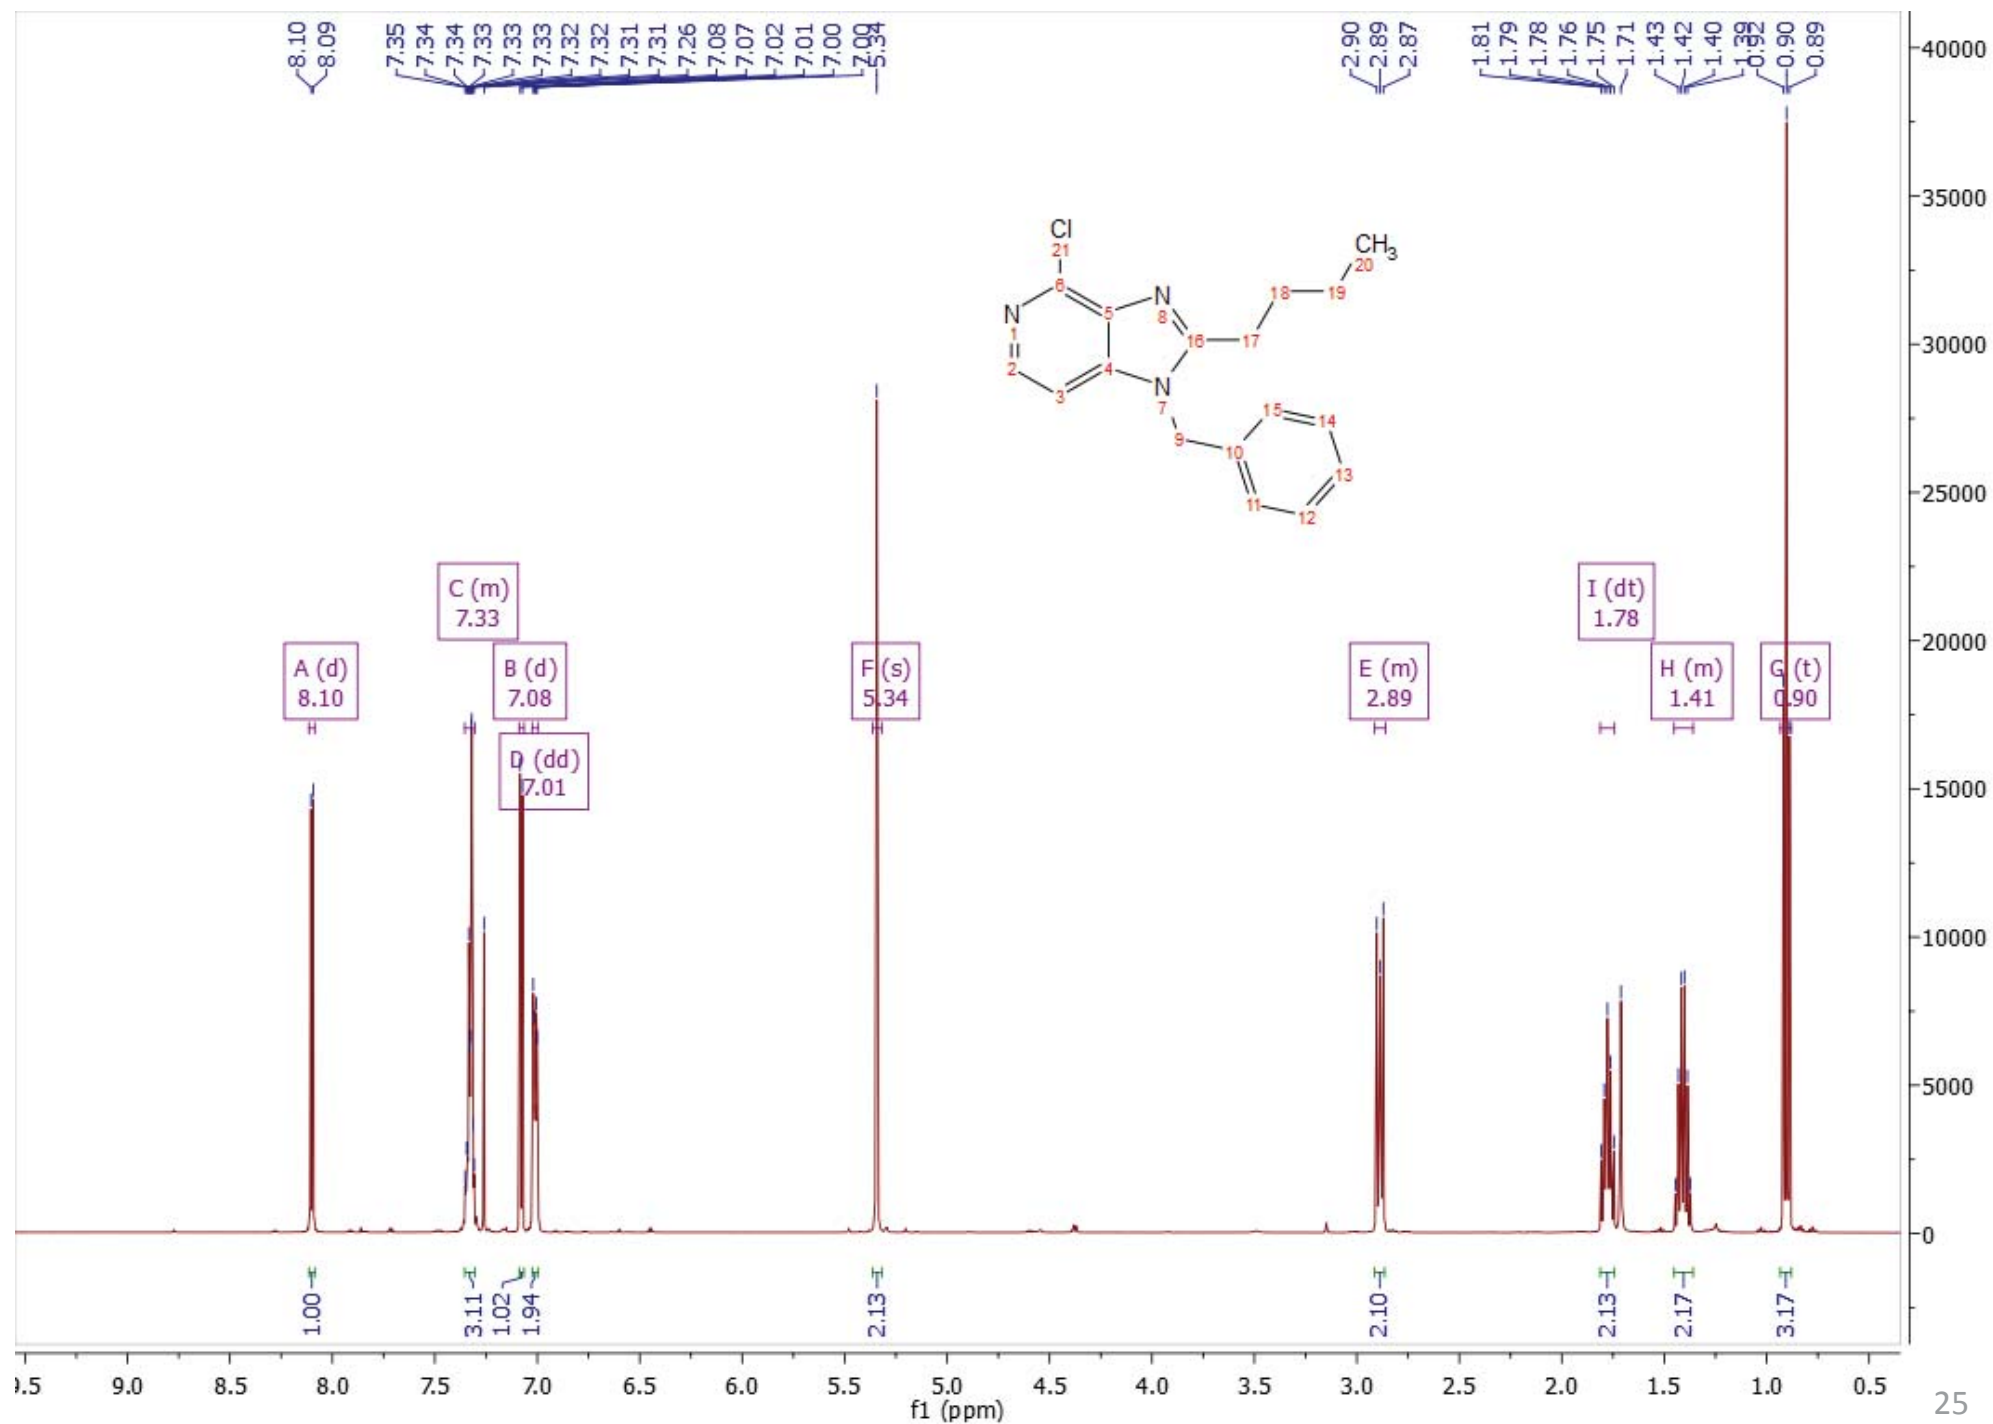

# $^{10}^{13}\text{C}$ NMR

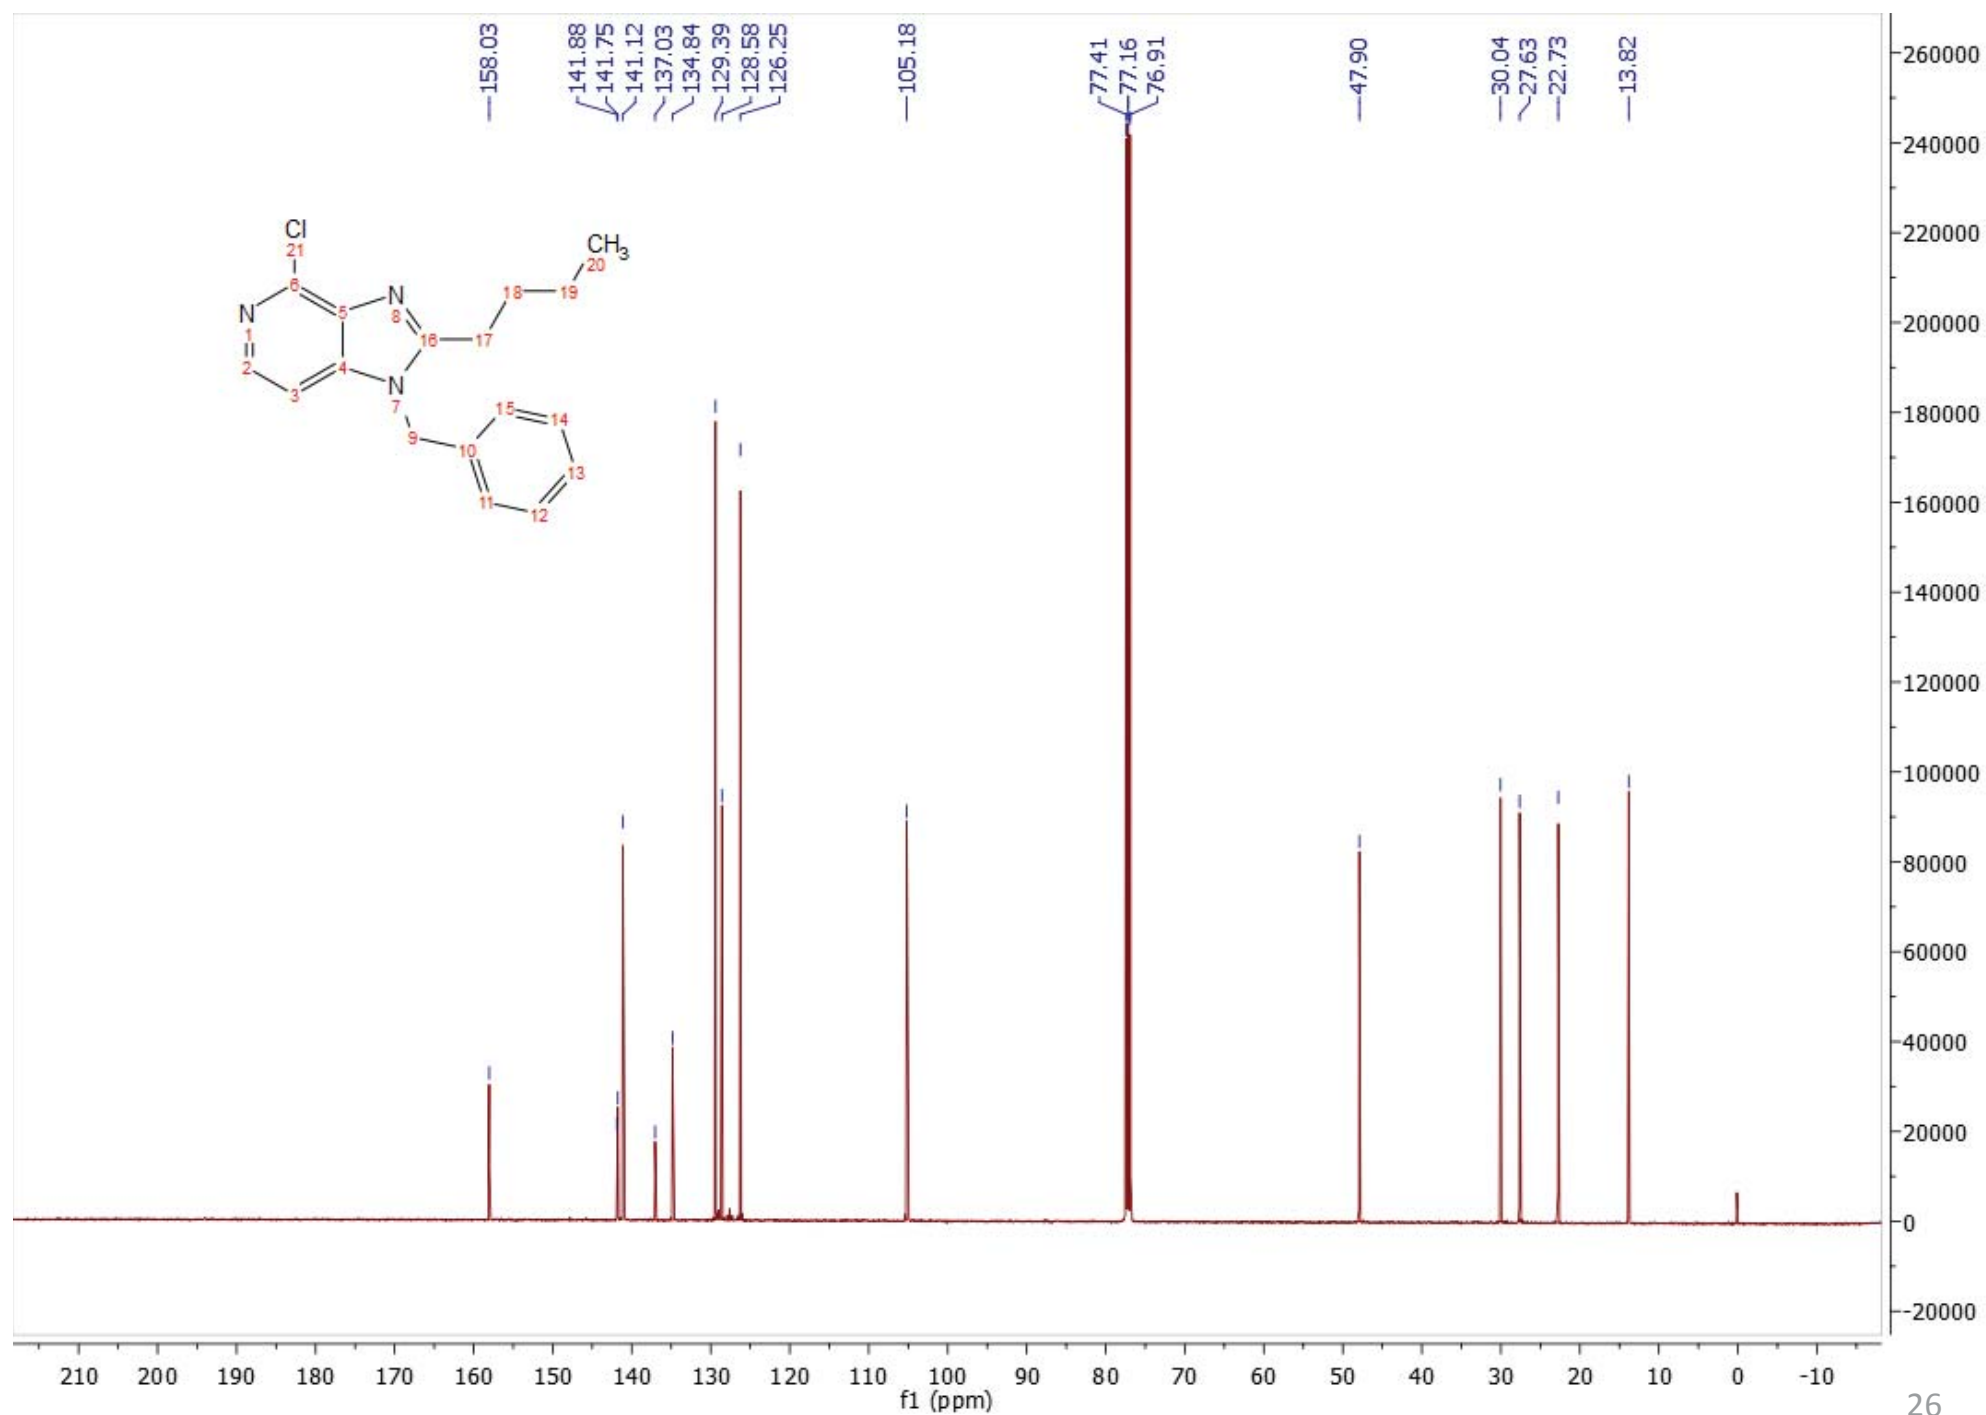

# 10 MS

|                      |                      |                    |                      |                        |              |                               |                      |
|----------------------|----------------------|--------------------|----------------------|------------------------|--------------|-------------------------------|----------------------|
| <b>Sample Name</b>   | 03.06.12 EY-1-261 tu | <b>Position</b>    | Vial 1               | <b>Instrument Name</b> | Instrument 1 | <b>User Name</b>              |                      |
| <b>Inj Vol</b>       | -1                   | <b>InjPosition</b> |                      | <b>SampleType</b>      | Sample       | <b>IRM Calibration Status</b> | Success              |
| <b>Data Filename</b> | 03.06.12 EY-1-261 tu | <b>ACQ Method</b>  | Water-ACN Infusion M | <b>Comment</b>         |              | <b>Acquired Time</b>          | 3/6/2012 11:23:51 AM |

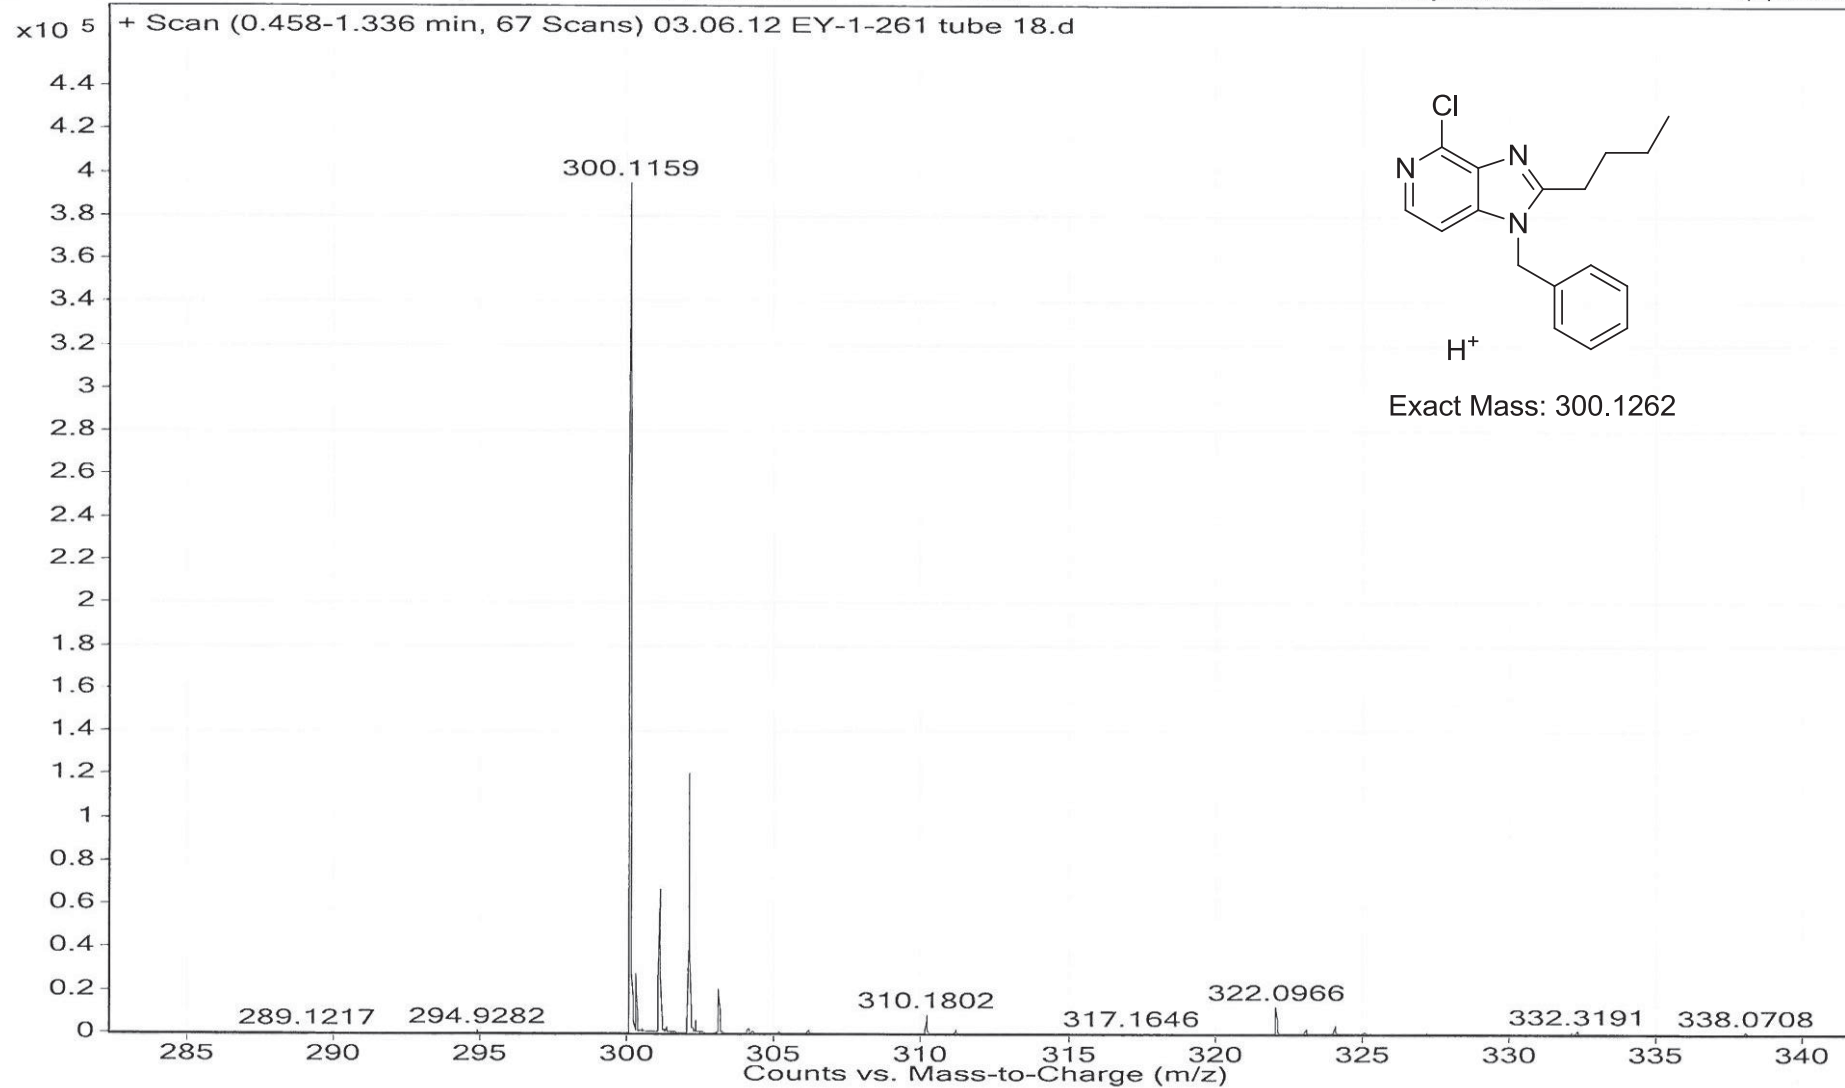



# 11a <sup>1</sup>H NMR

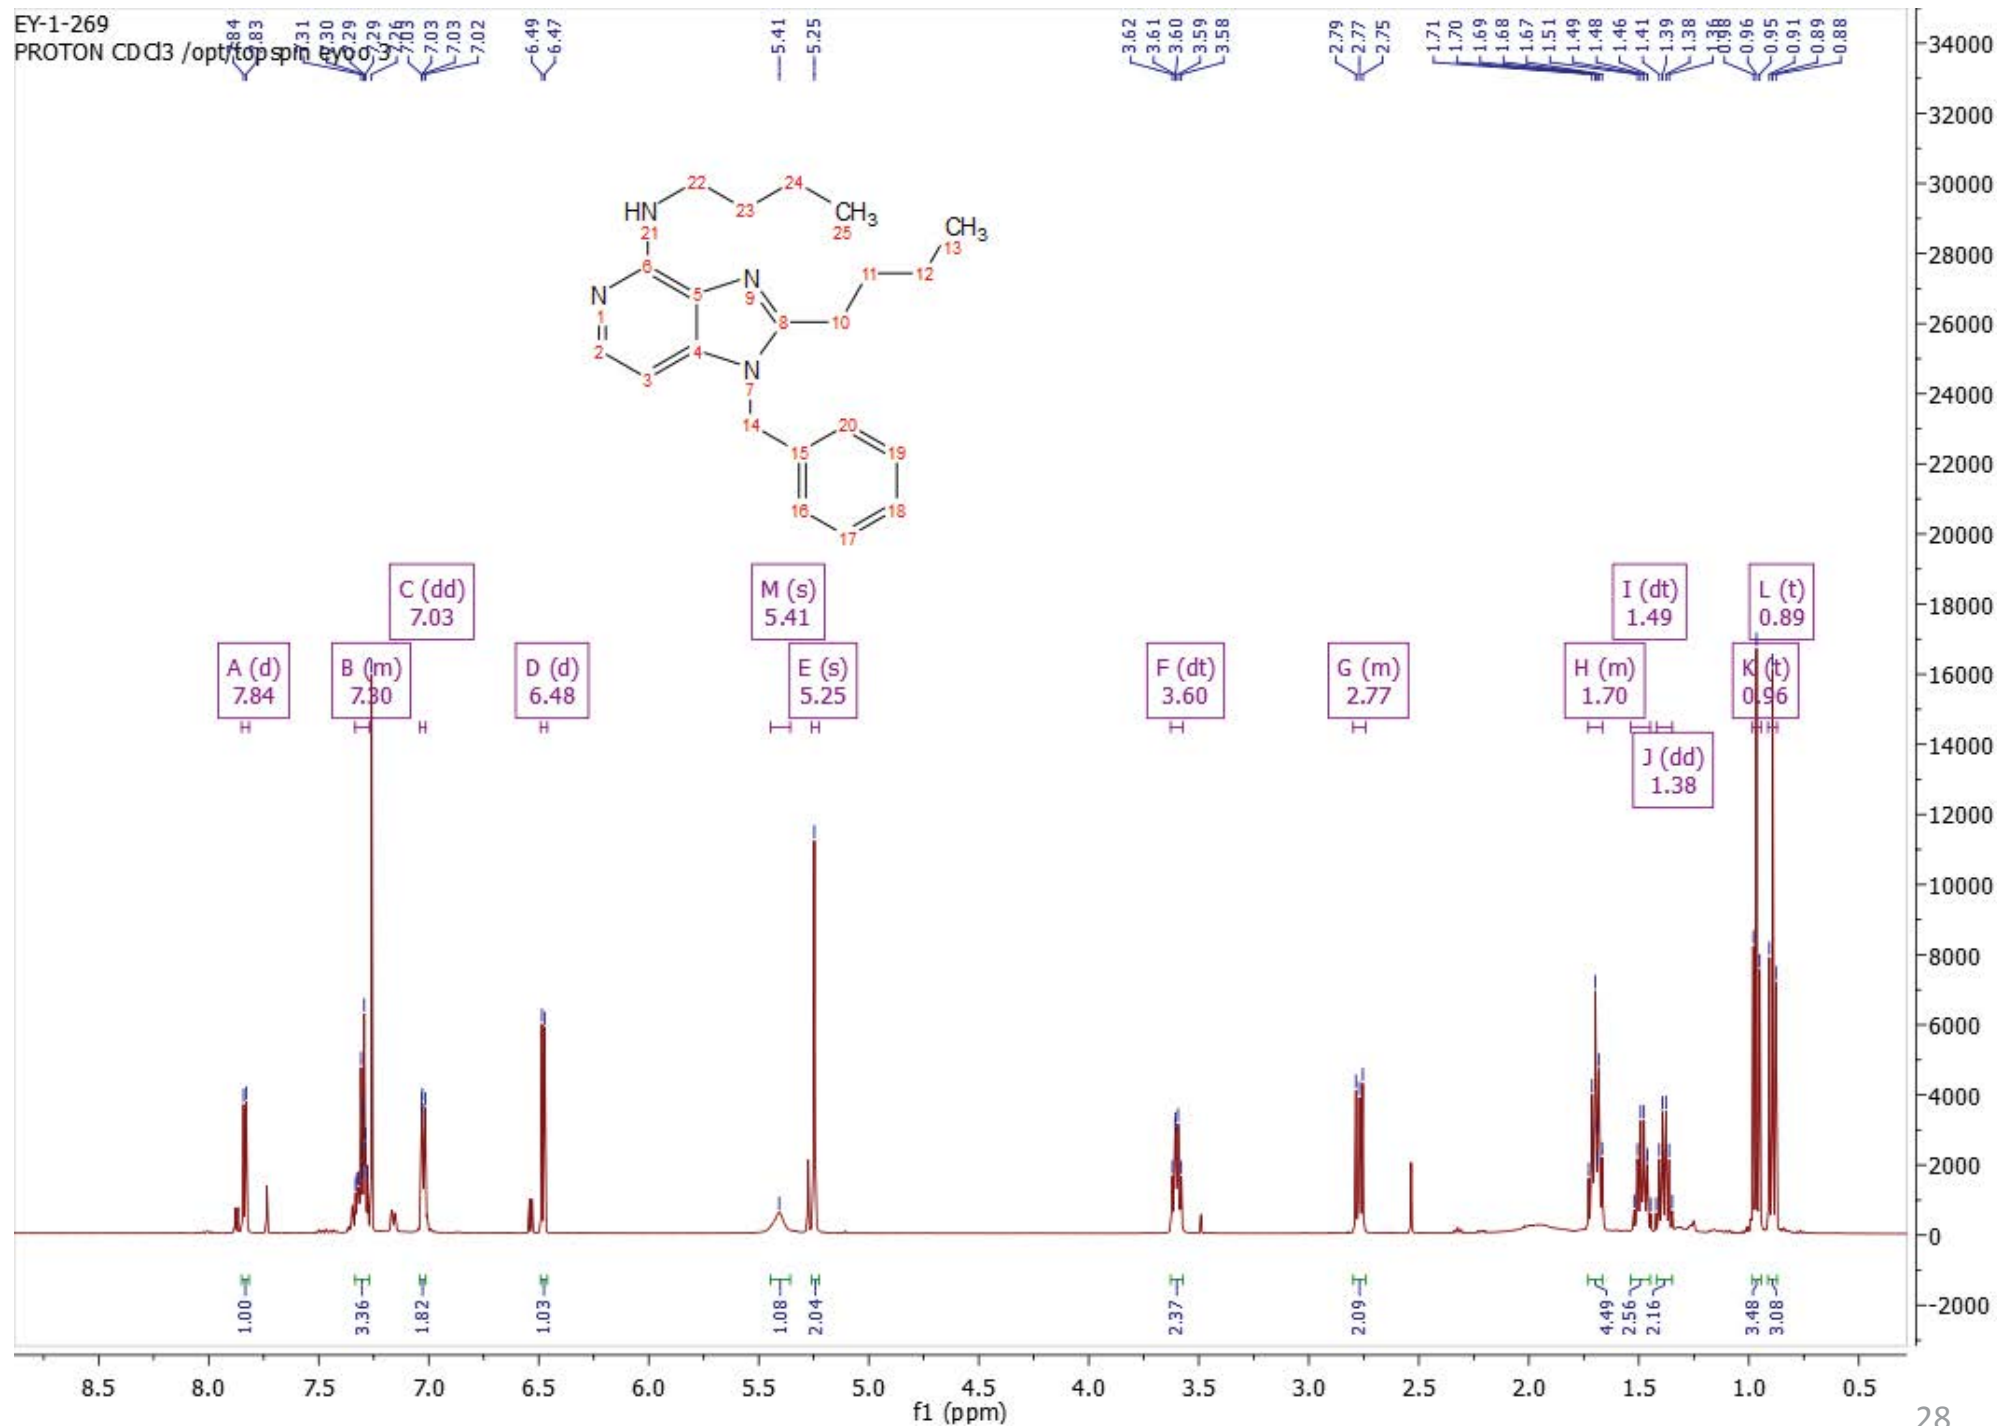



# 11a <sup>13</sup>C NMR

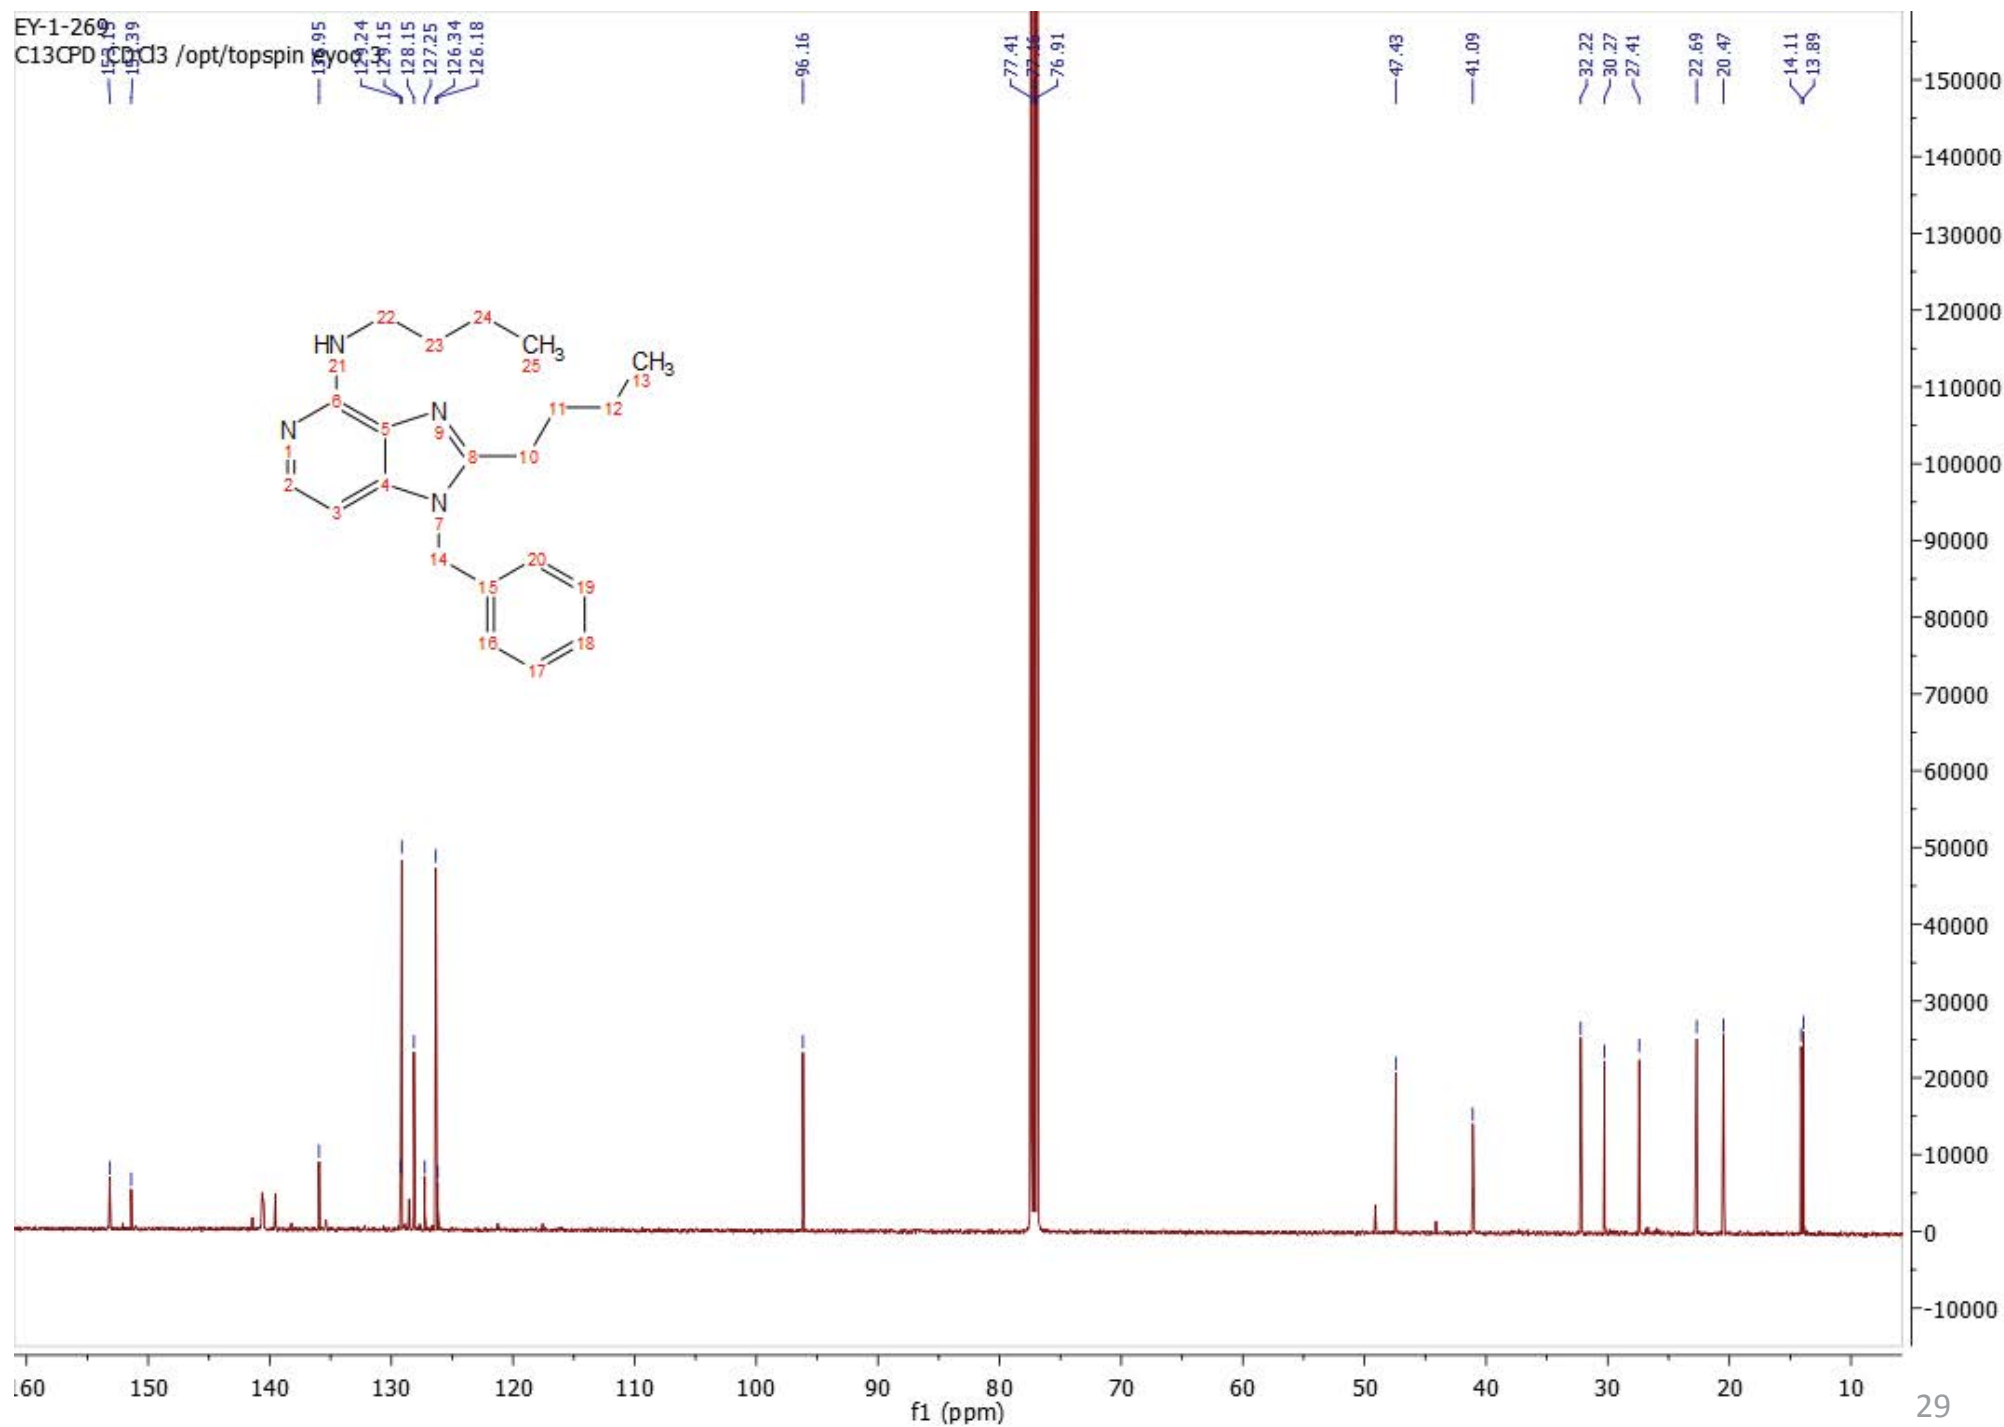

# 11a MS

|               |                      |             |                      |                 |              |                        |                      |
|---------------|----------------------|-------------|----------------------|-----------------|--------------|------------------------|----------------------|
| Sample Name   | 03.17.12 EY-1-269 tu | Position    | Vial 1               | Instrument Name | Instrument 1 | User Name              |                      |
| Inj Vol       | -1                   | InjPosition |                      | SampleType      | Sample       | IRM Calibration Status | Success              |
| Data Filename | 03.17.12 EY-1-269 tu | ACQ Method  | Water-ACN Infusion M | Comment         |              | Acquired Time          | 3/17/2012 4:47:15 PM |

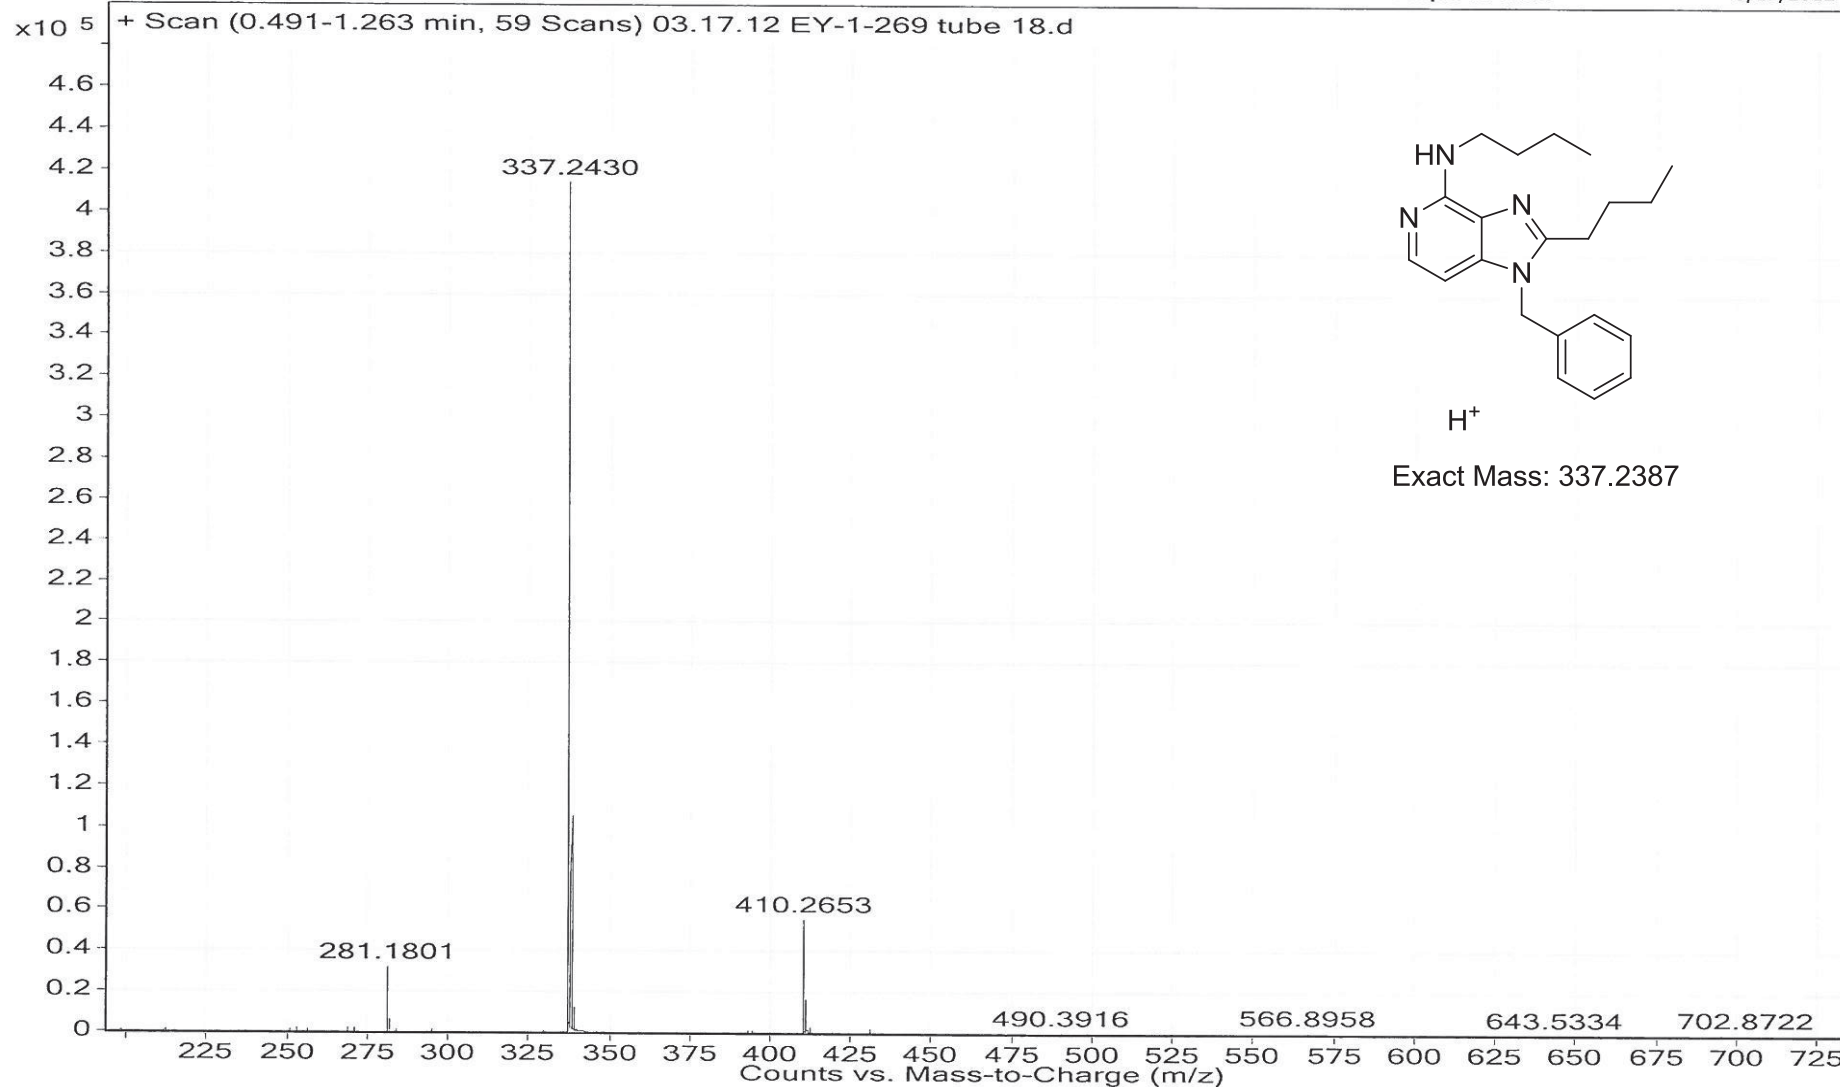

# 11a LC-MS

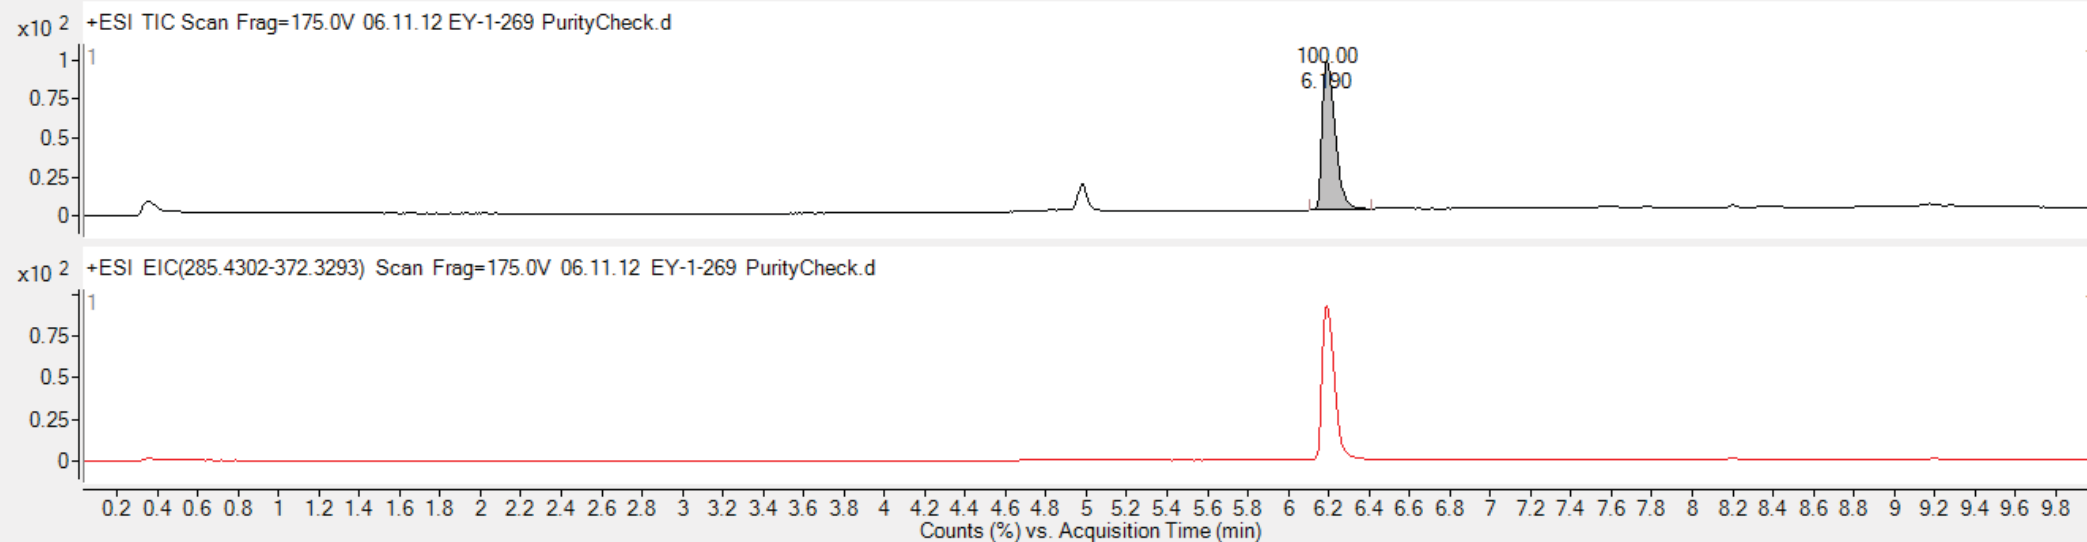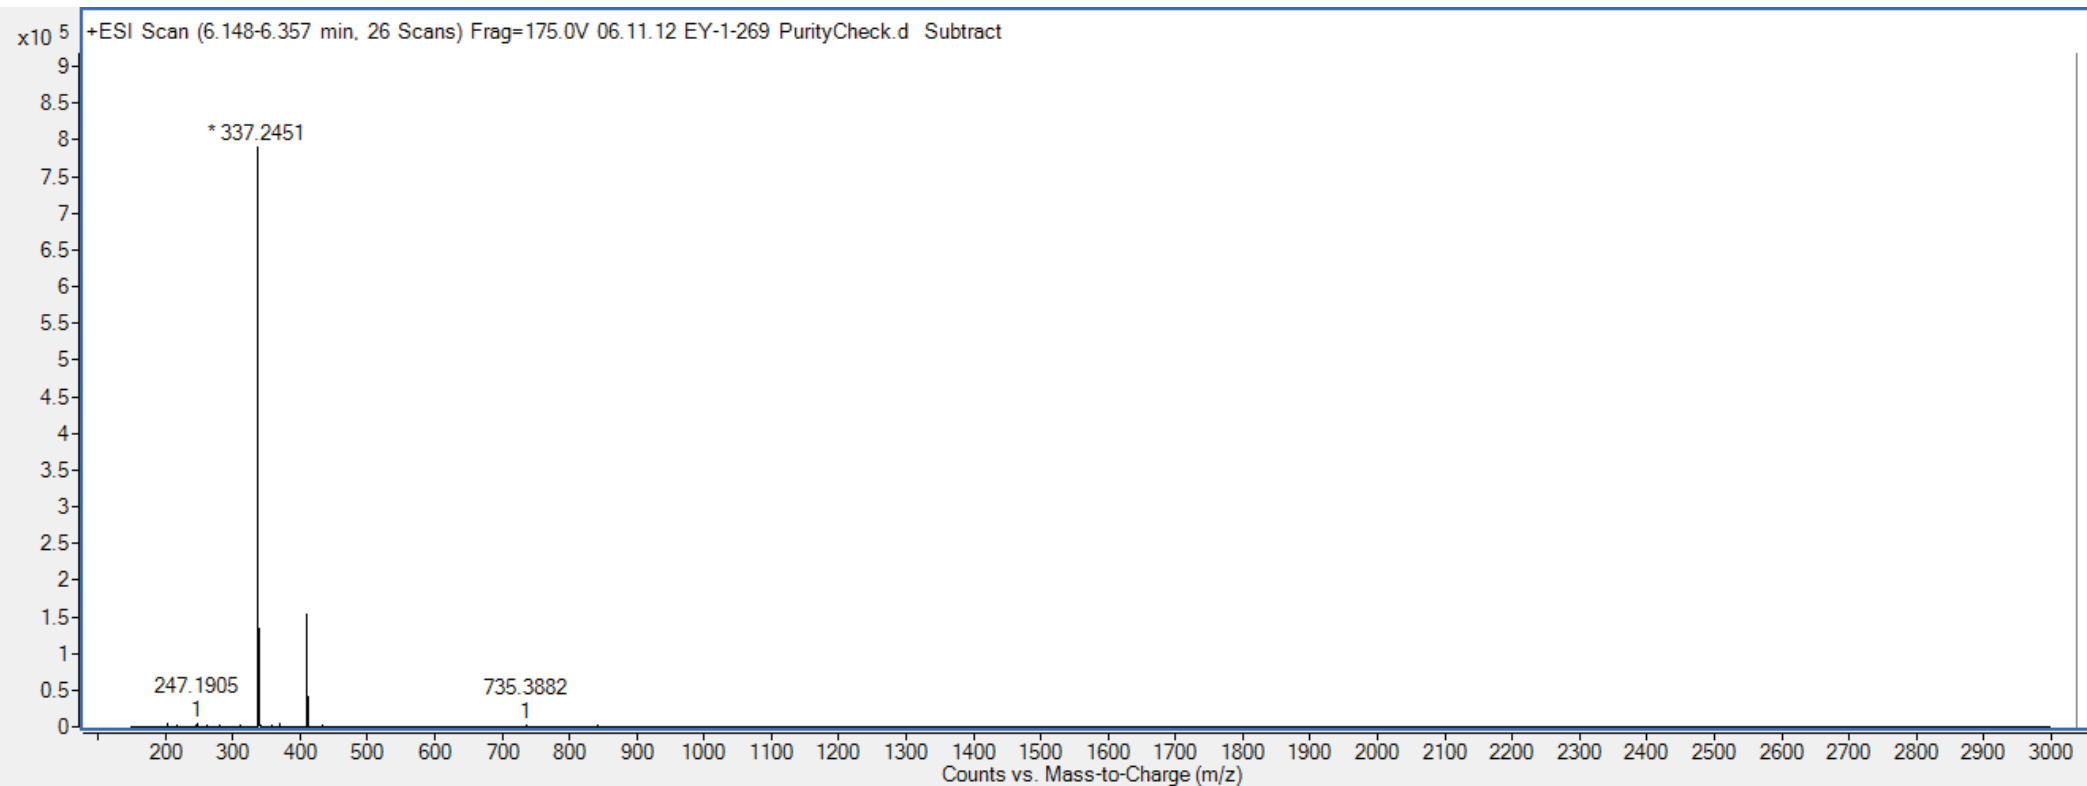

# 11b <sup>1</sup>H NMR

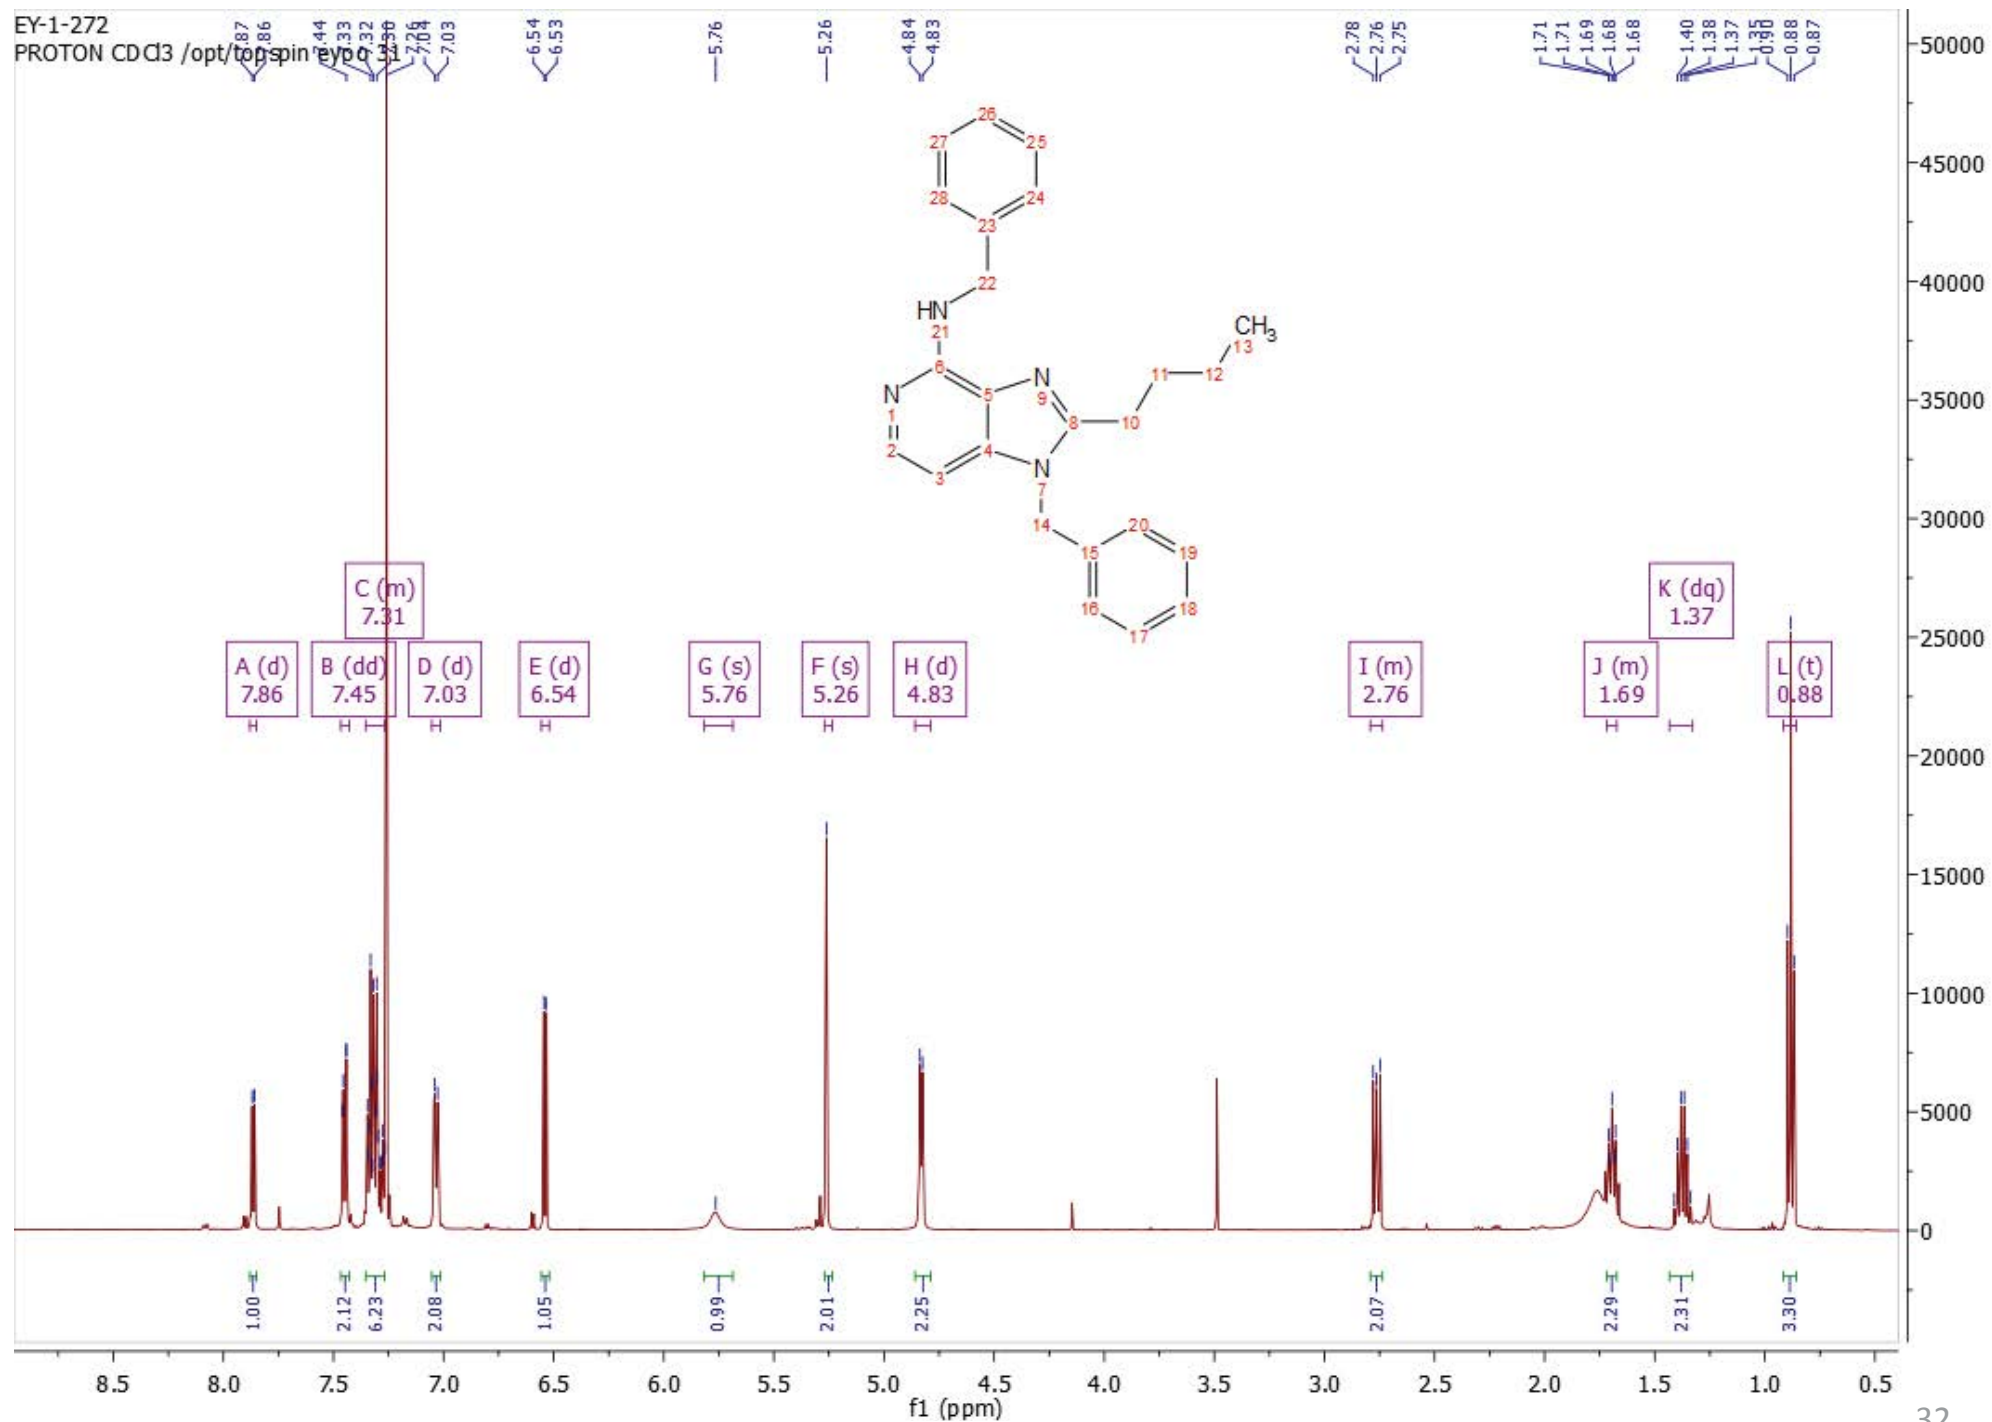

# 11b <sup>13</sup>C NMR

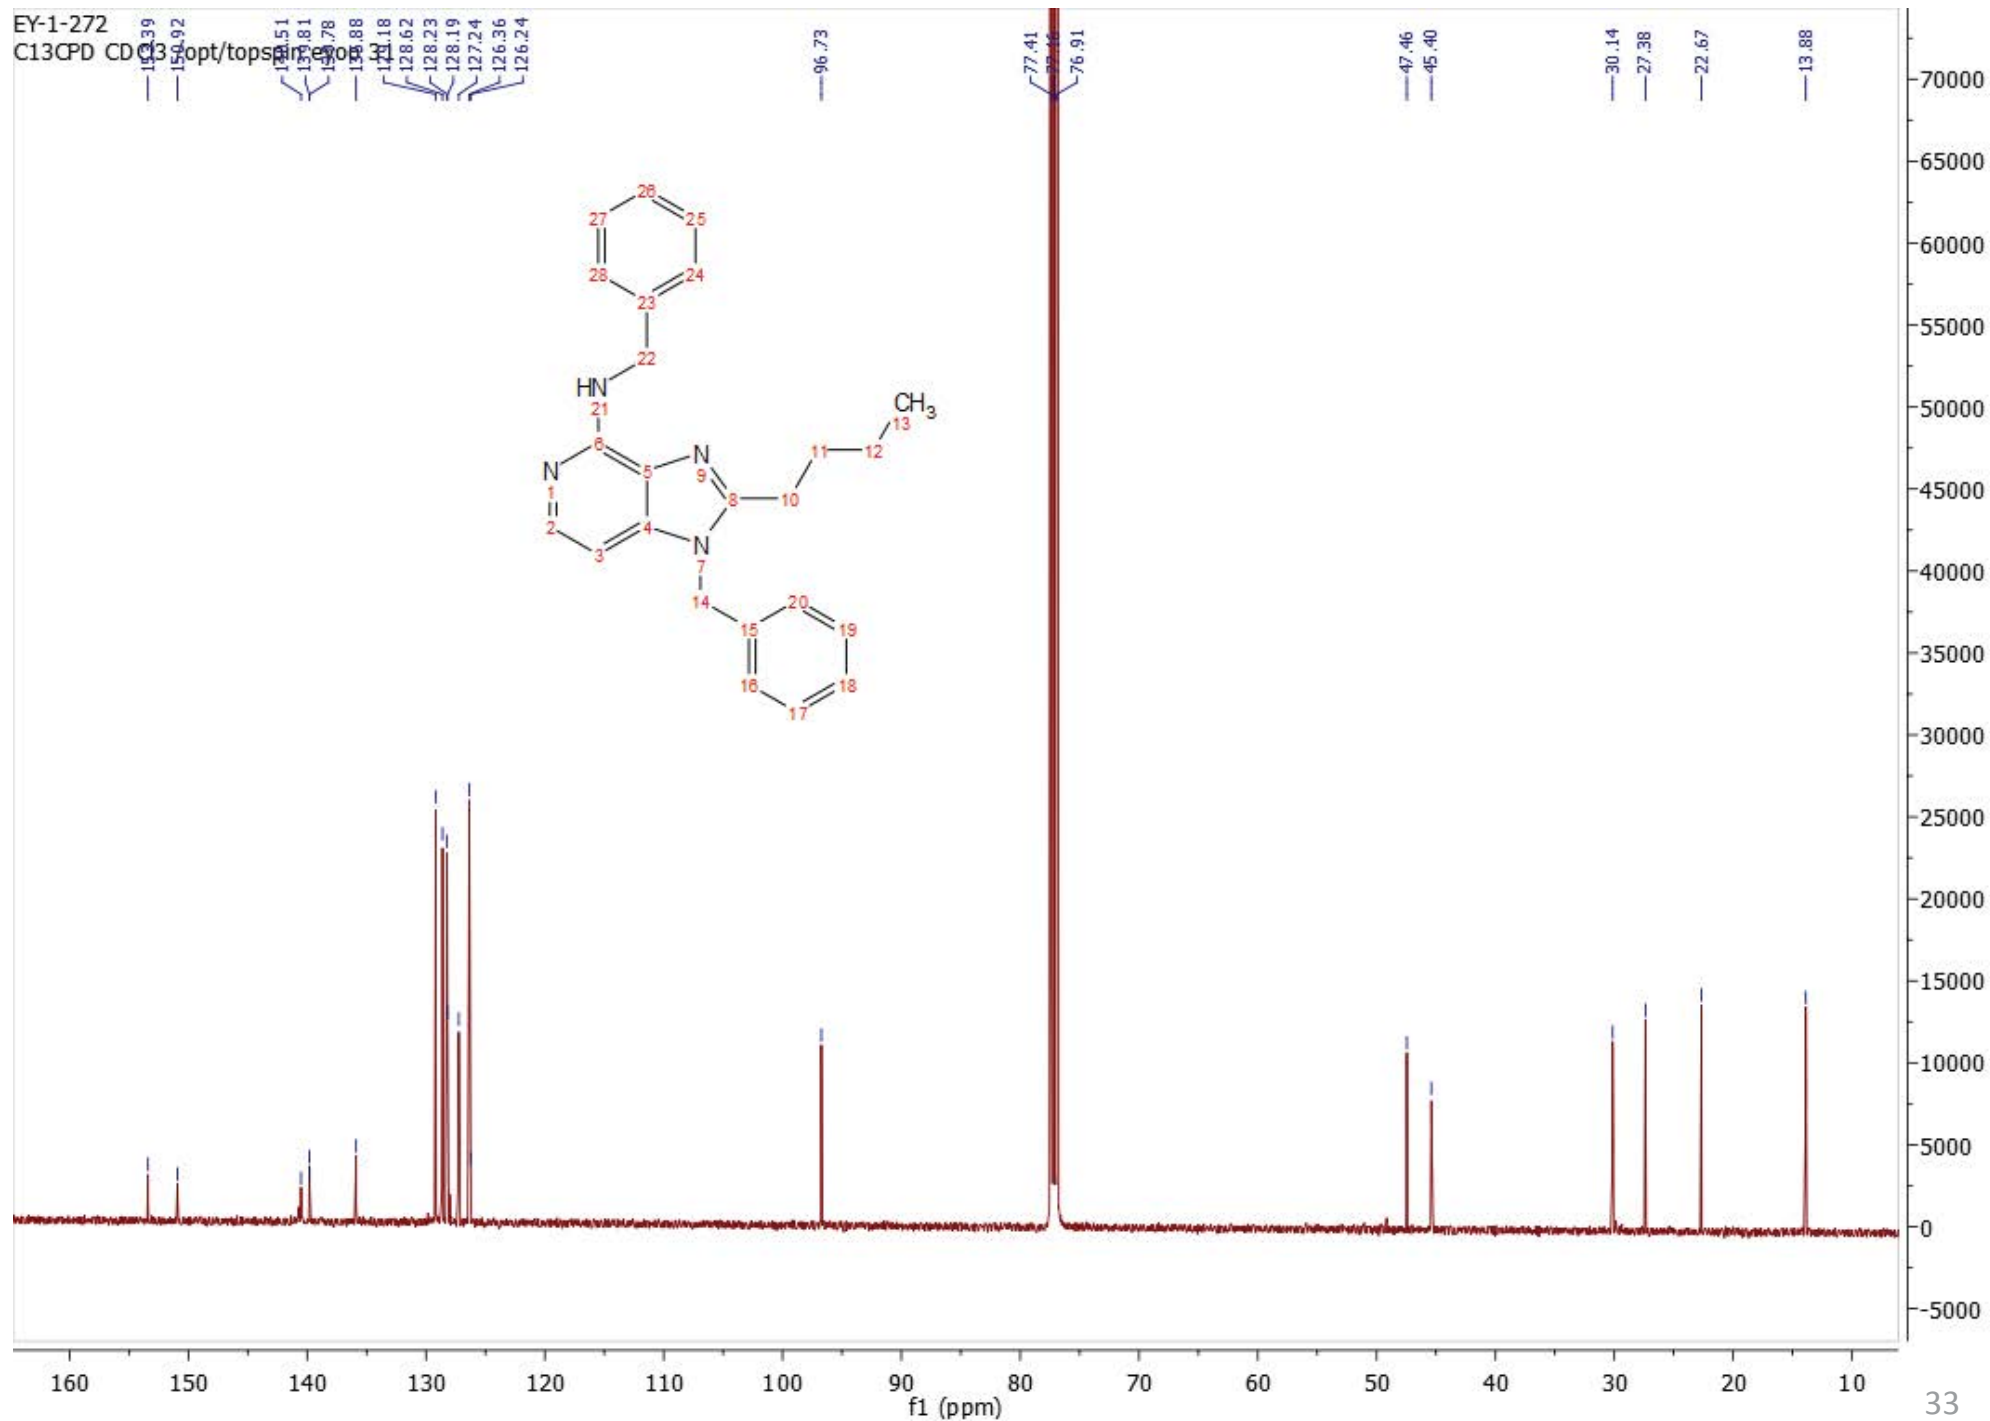

# 11b MS

|               |                      |             |                      |                 |              |                        |                       |
|---------------|----------------------|-------------|----------------------|-----------------|--------------|------------------------|-----------------------|
| Sample Name   | 03.20.12 EY-1-272 tu | Position    | Vial 1               | Instrument Name | Instrument 1 | User Name              |                       |
| Inj Vol       | -1                   | InjPosition |                      | SampleType      | Sample       | IRM Calibration Status | Success               |
| Data Filename | 03.20.12 EY-1-272 tu | ACQ Method  | Water-ACN Infusion M | Comment         |              | Acquired Time          | 3/20/2012 10:32:33 AM |

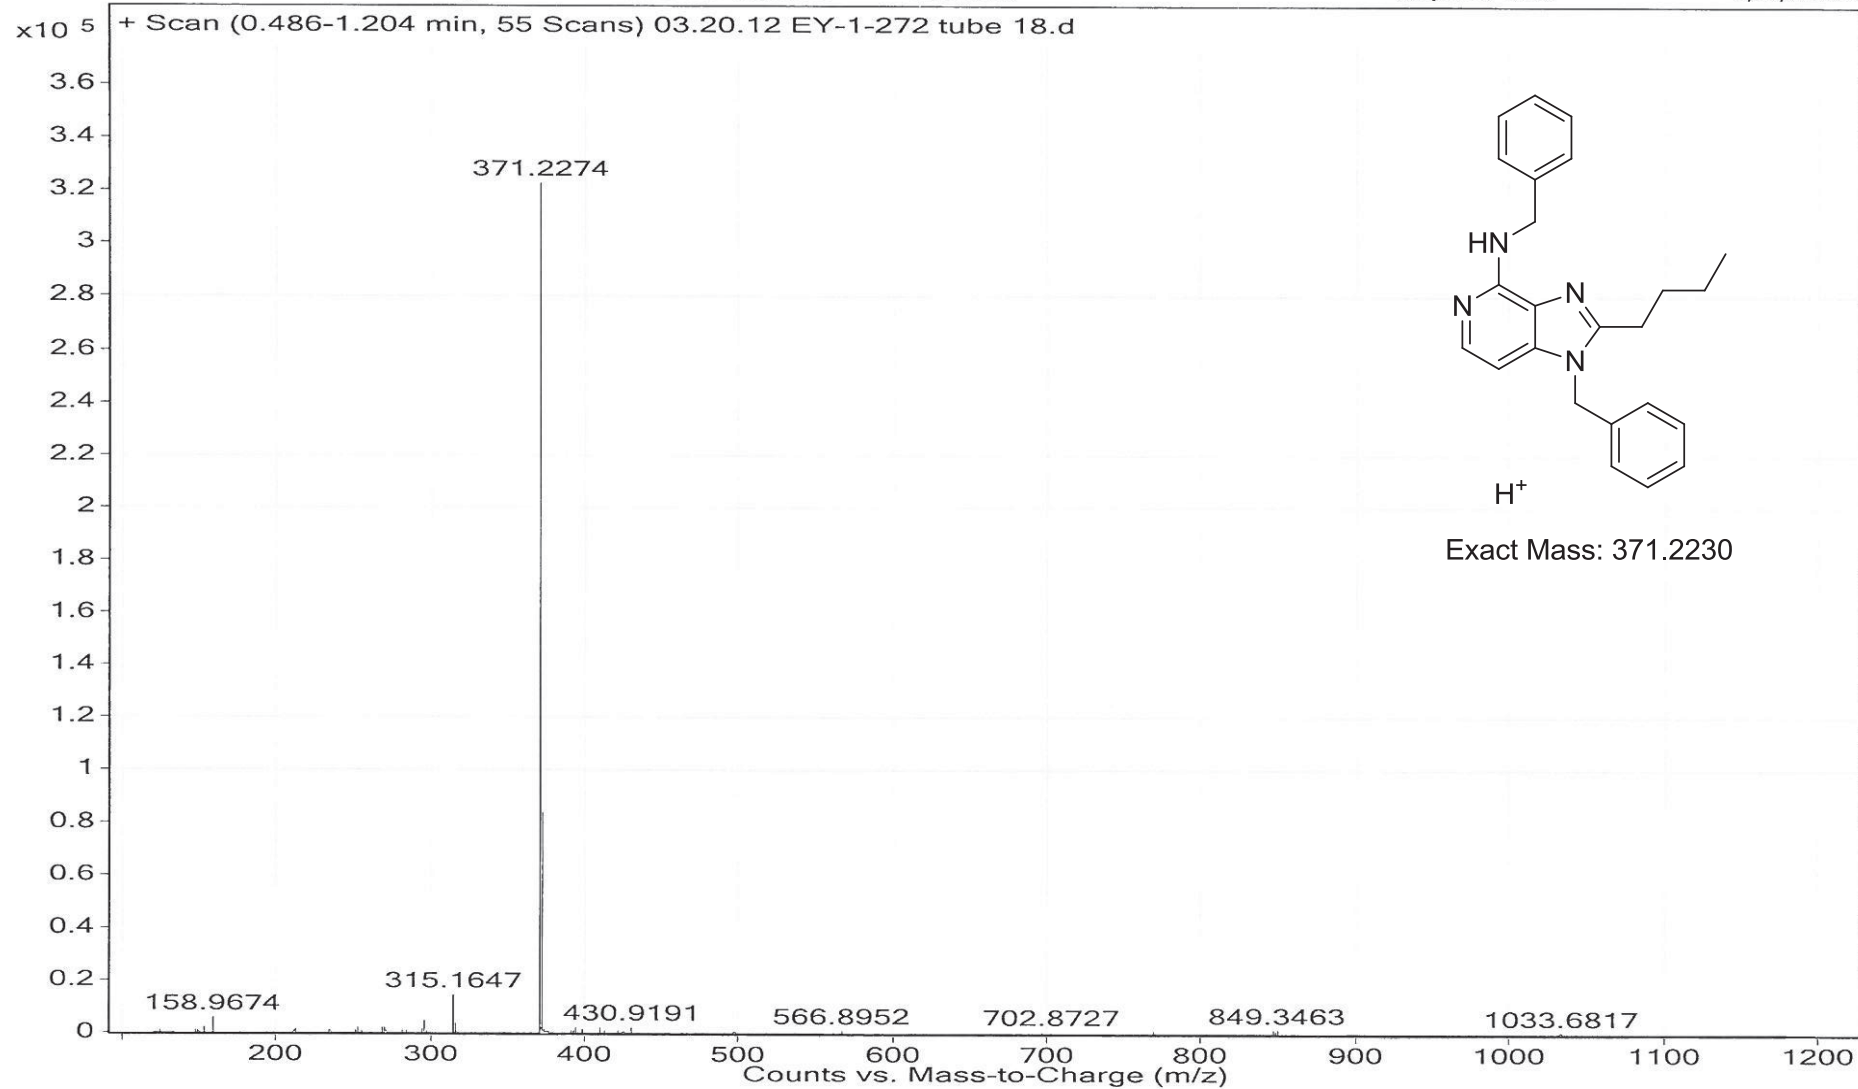

# 11b LC-MS

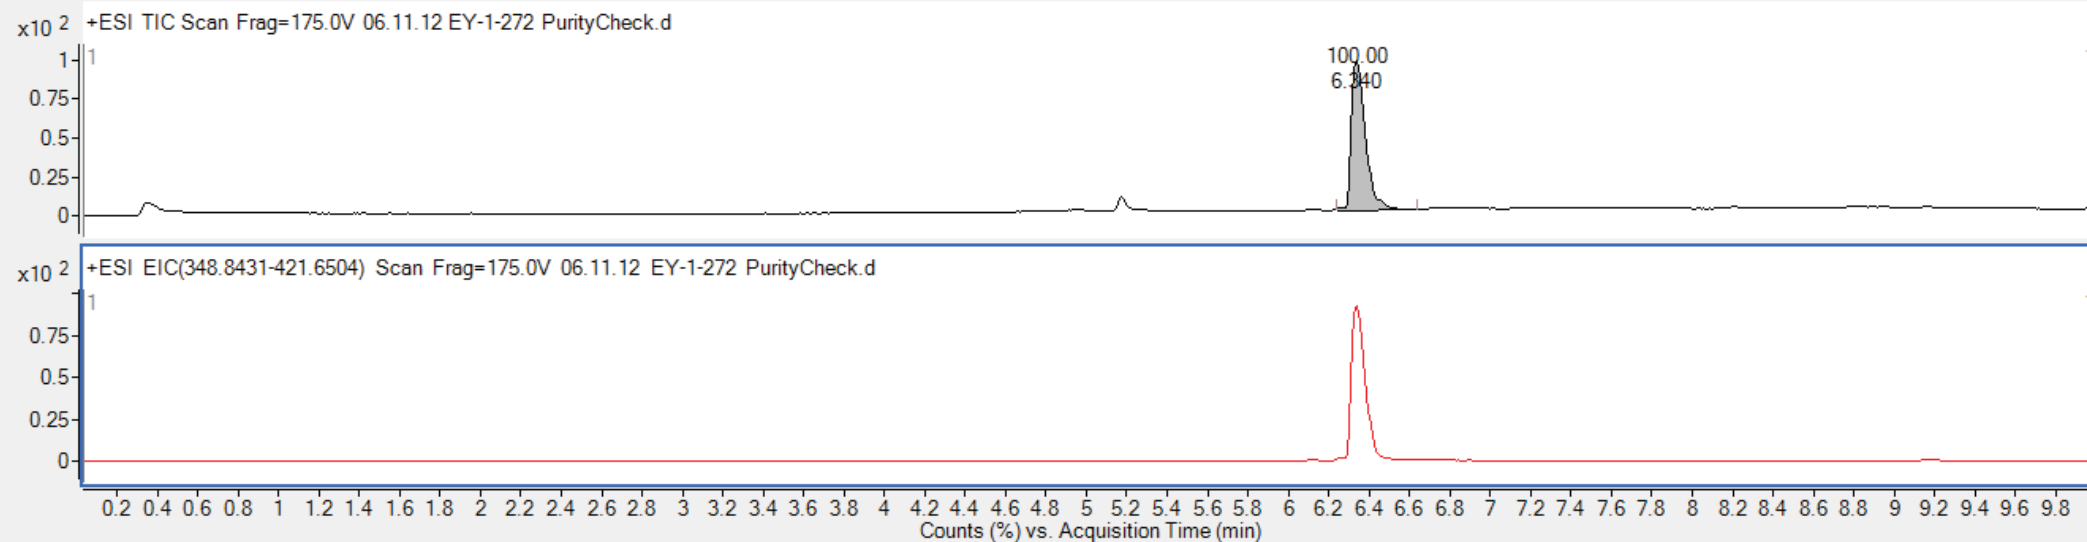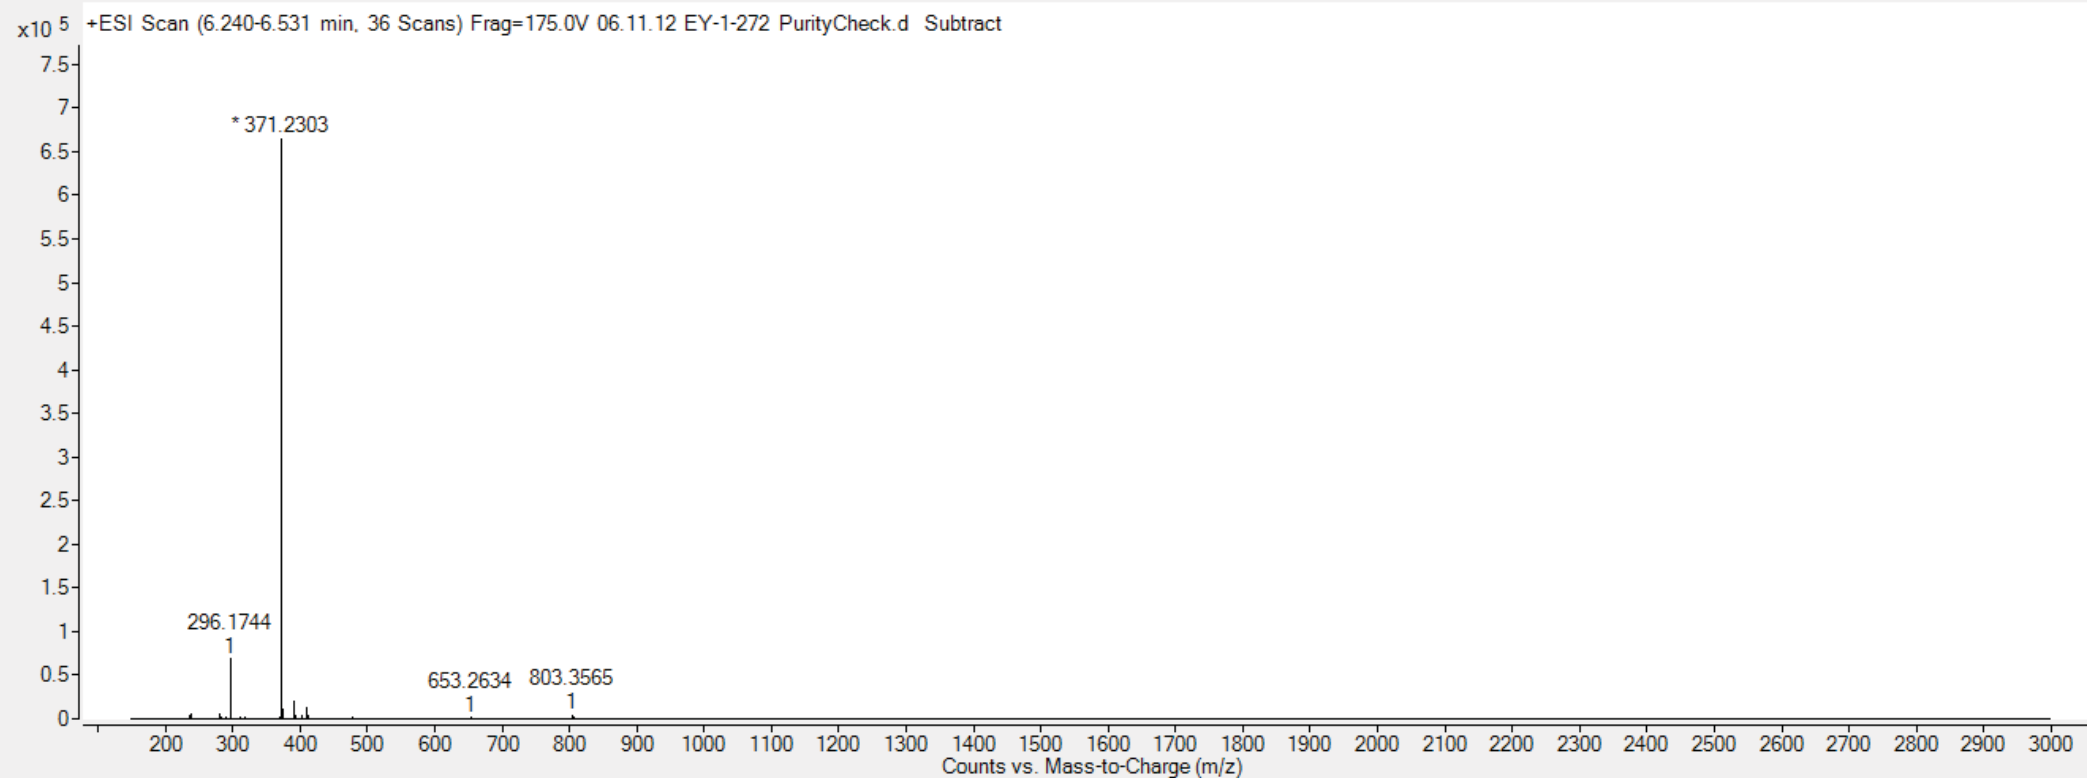



# 11c <sup>1</sup>H NMR

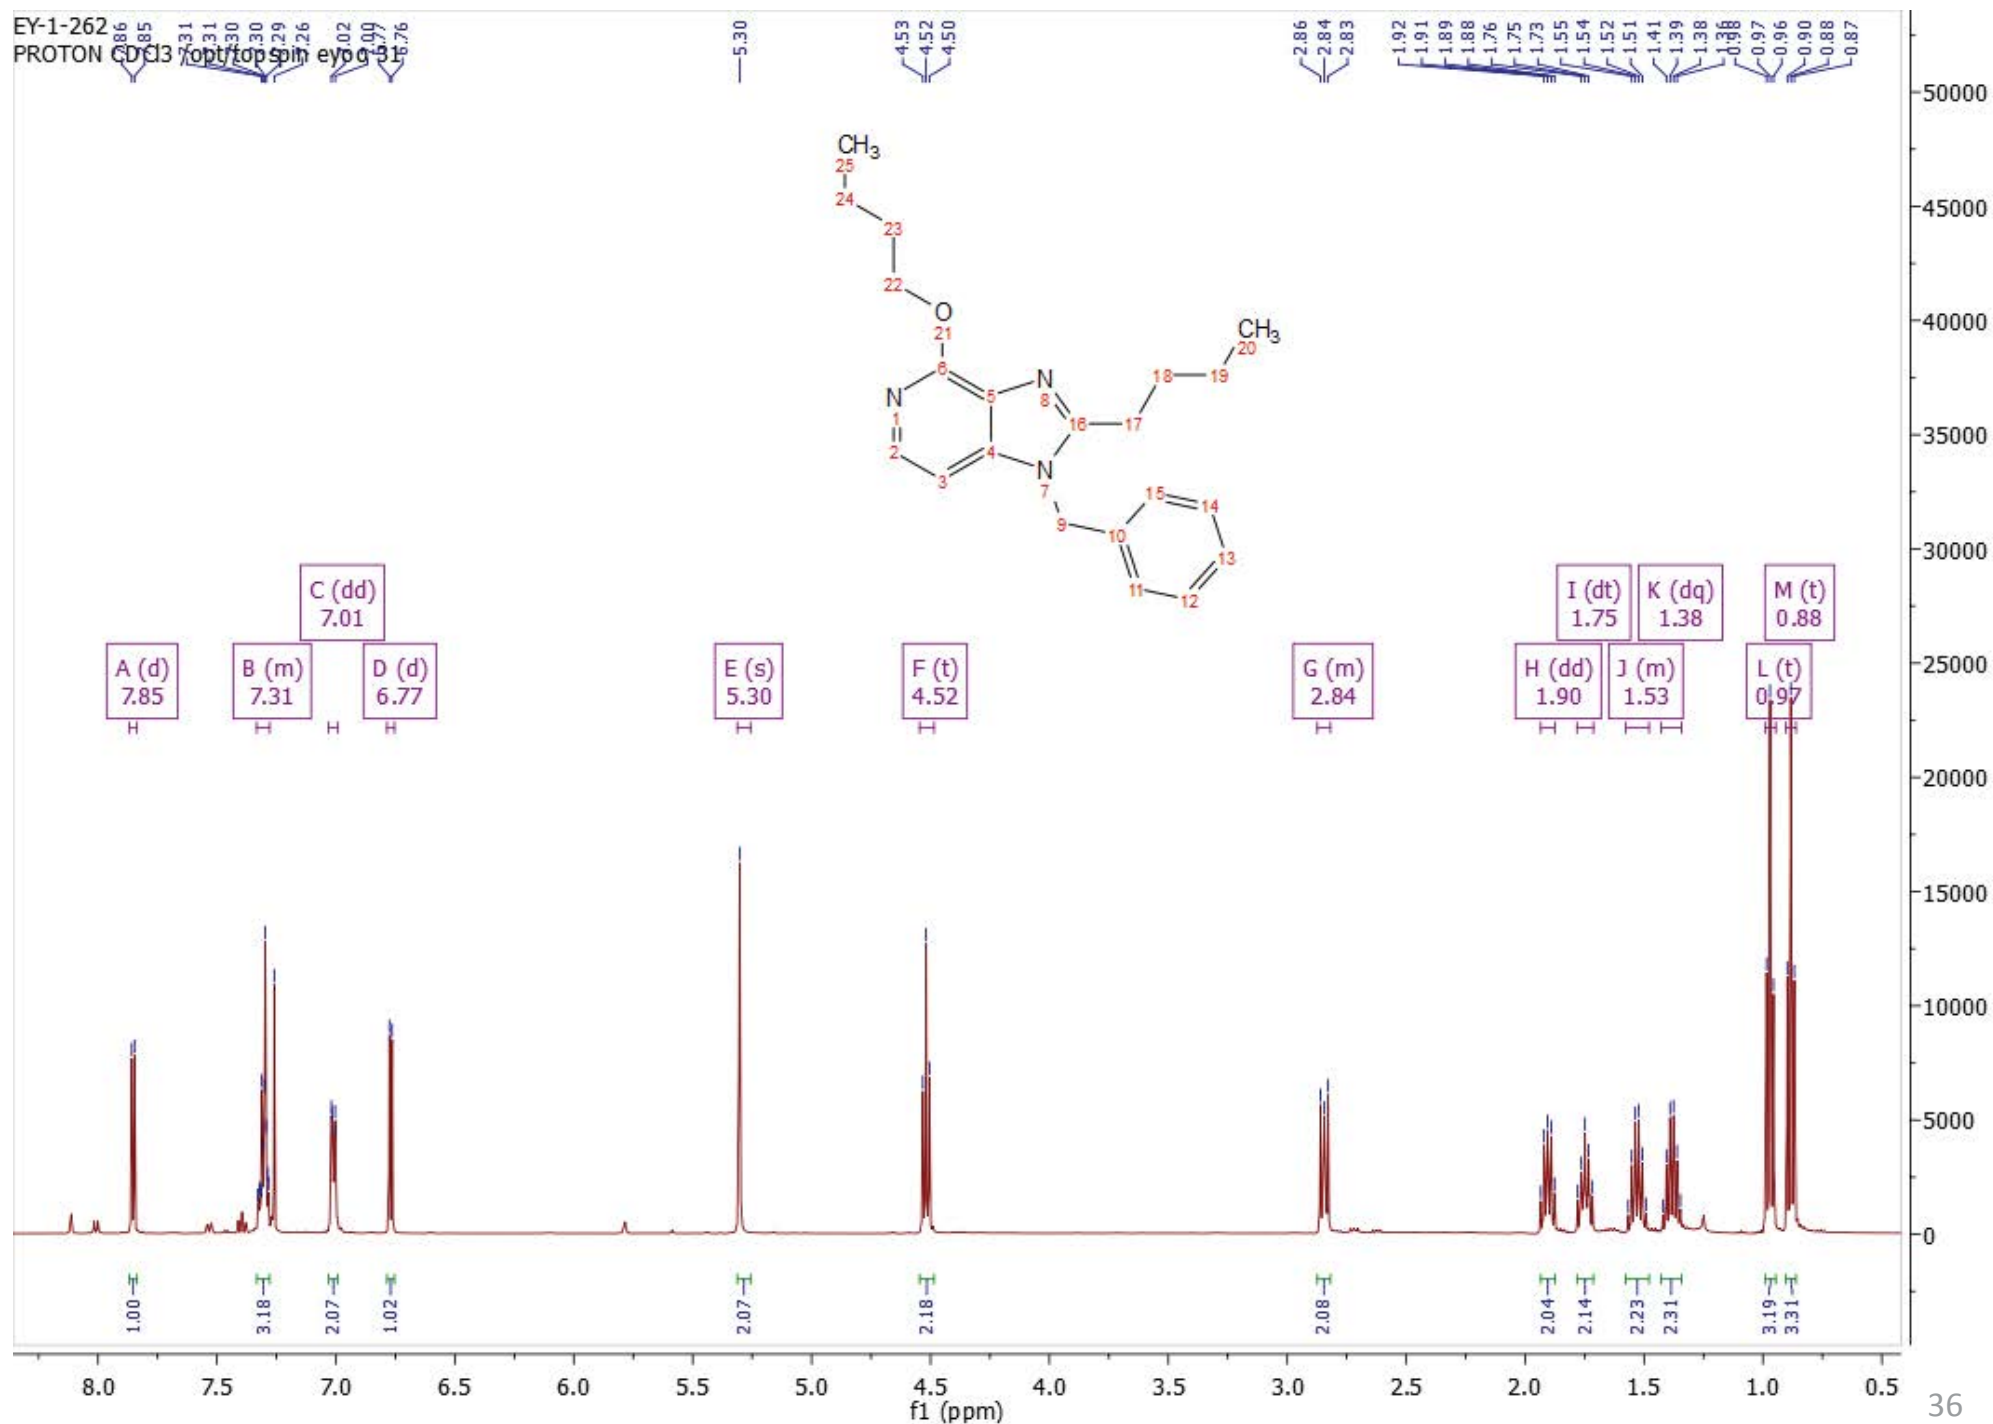



# 11c <sup>13</sup>C NMR

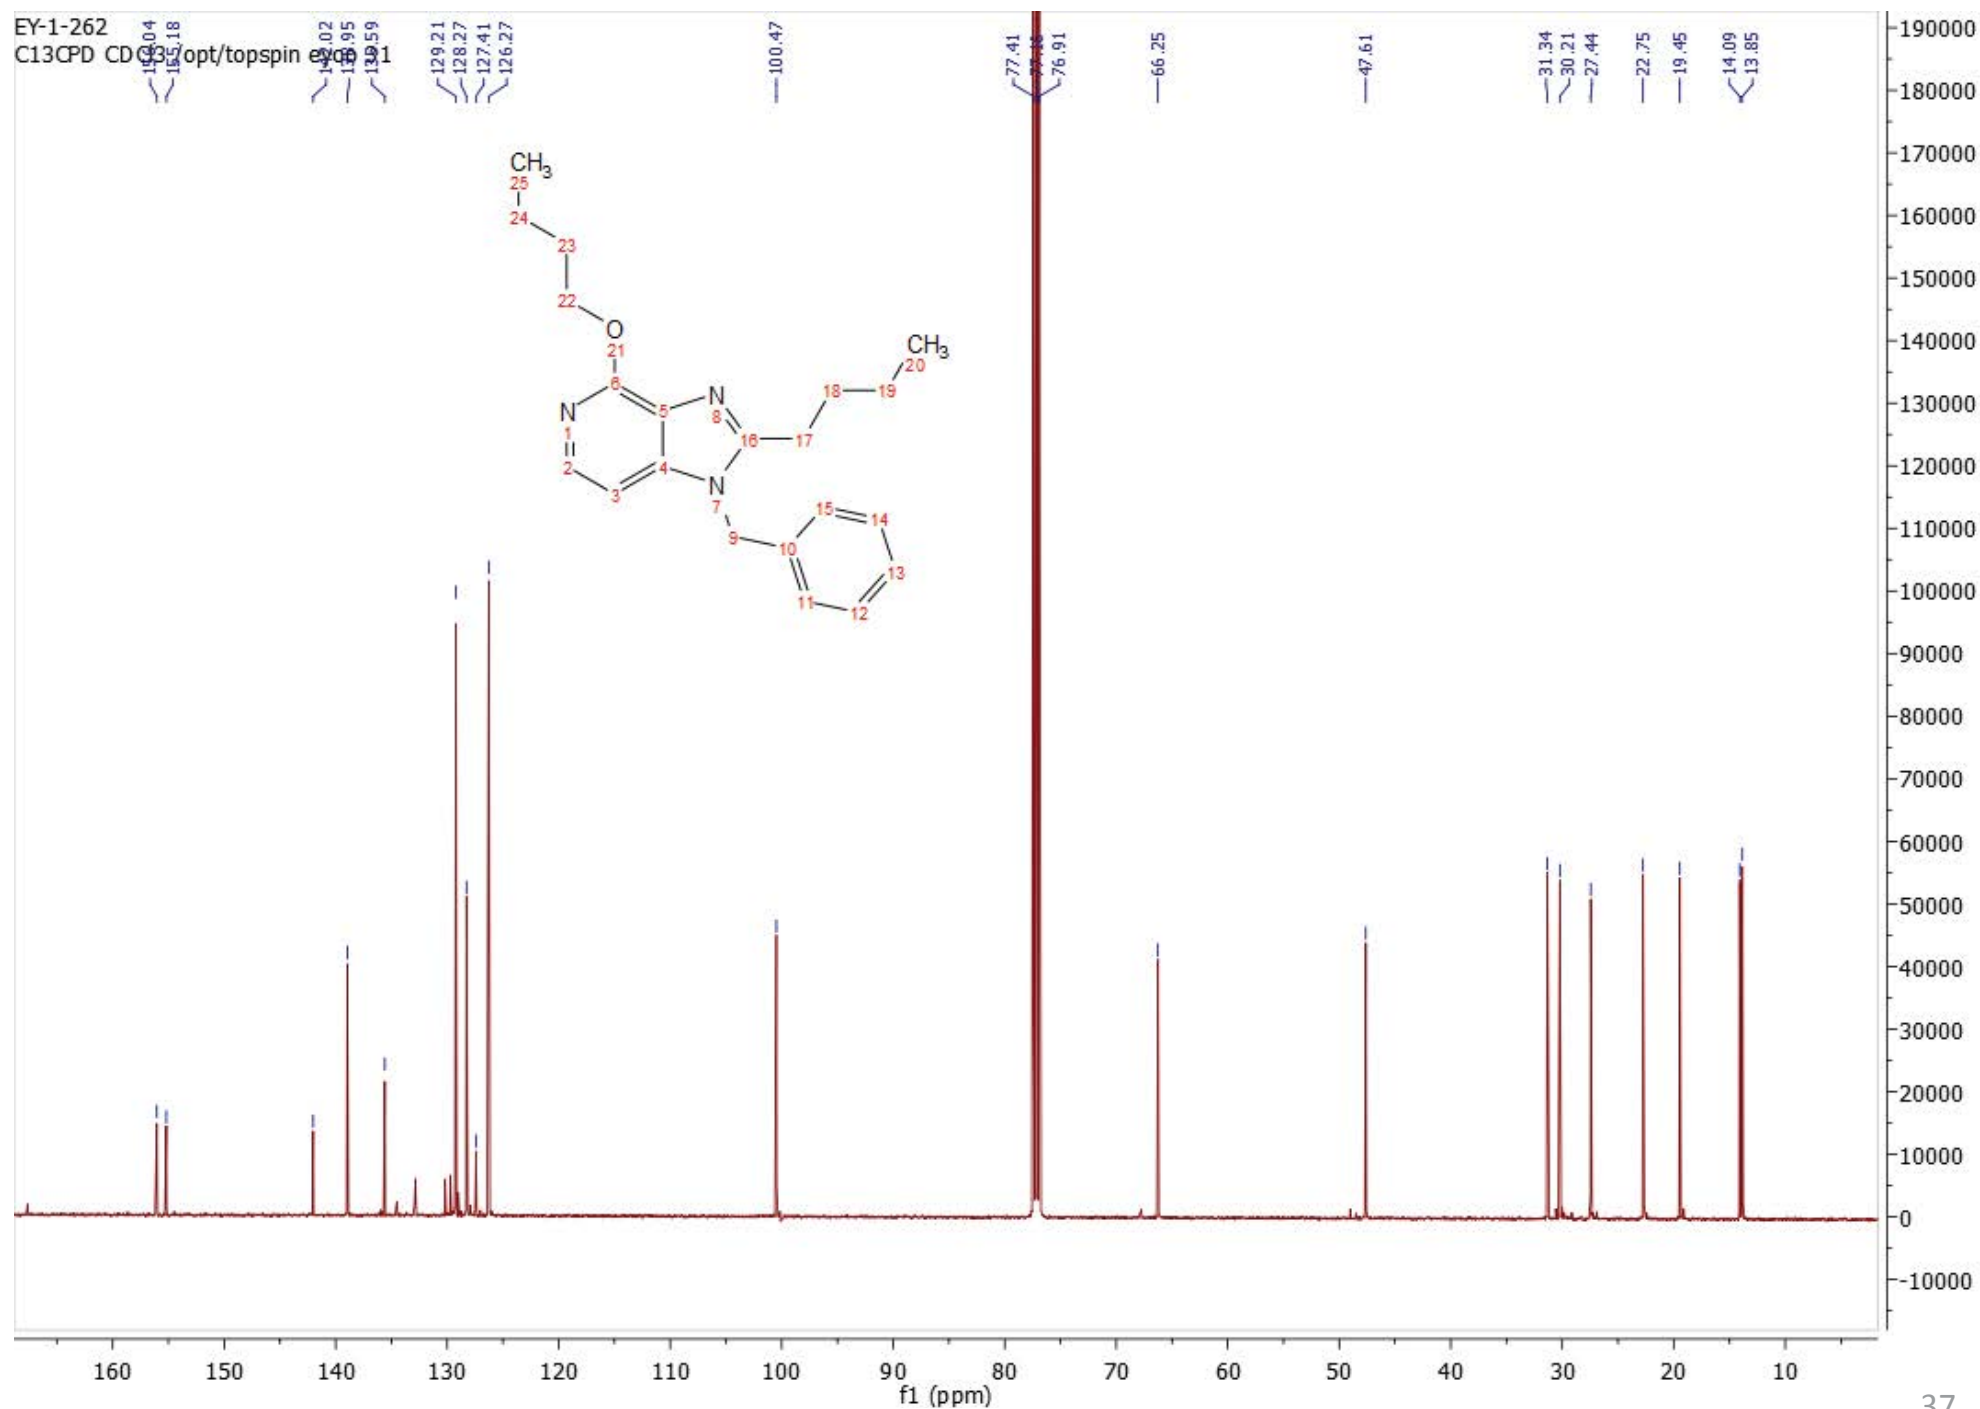

# 11c MS

|               |                     |             |                      |                 |              |                        |                     |
|---------------|---------------------|-------------|----------------------|-----------------|--------------|------------------------|---------------------|
| Sample Name   | 03.07.12 EY-1-262   | Position    | Vial 1               | Instrument Name | Instrument 1 | User Name              |                     |
| Inj Vol       | 8                   | InjPosition |                      | SampleType      | Sample       | IRM Calibration Status | Success             |
| Data Filename | 03.07.12 EY-1-262.d | ACQ Method  | Water-ACN Infusion M | Comment         |              | Acquired Time          | 3/7/2012 9:08:44 AM |

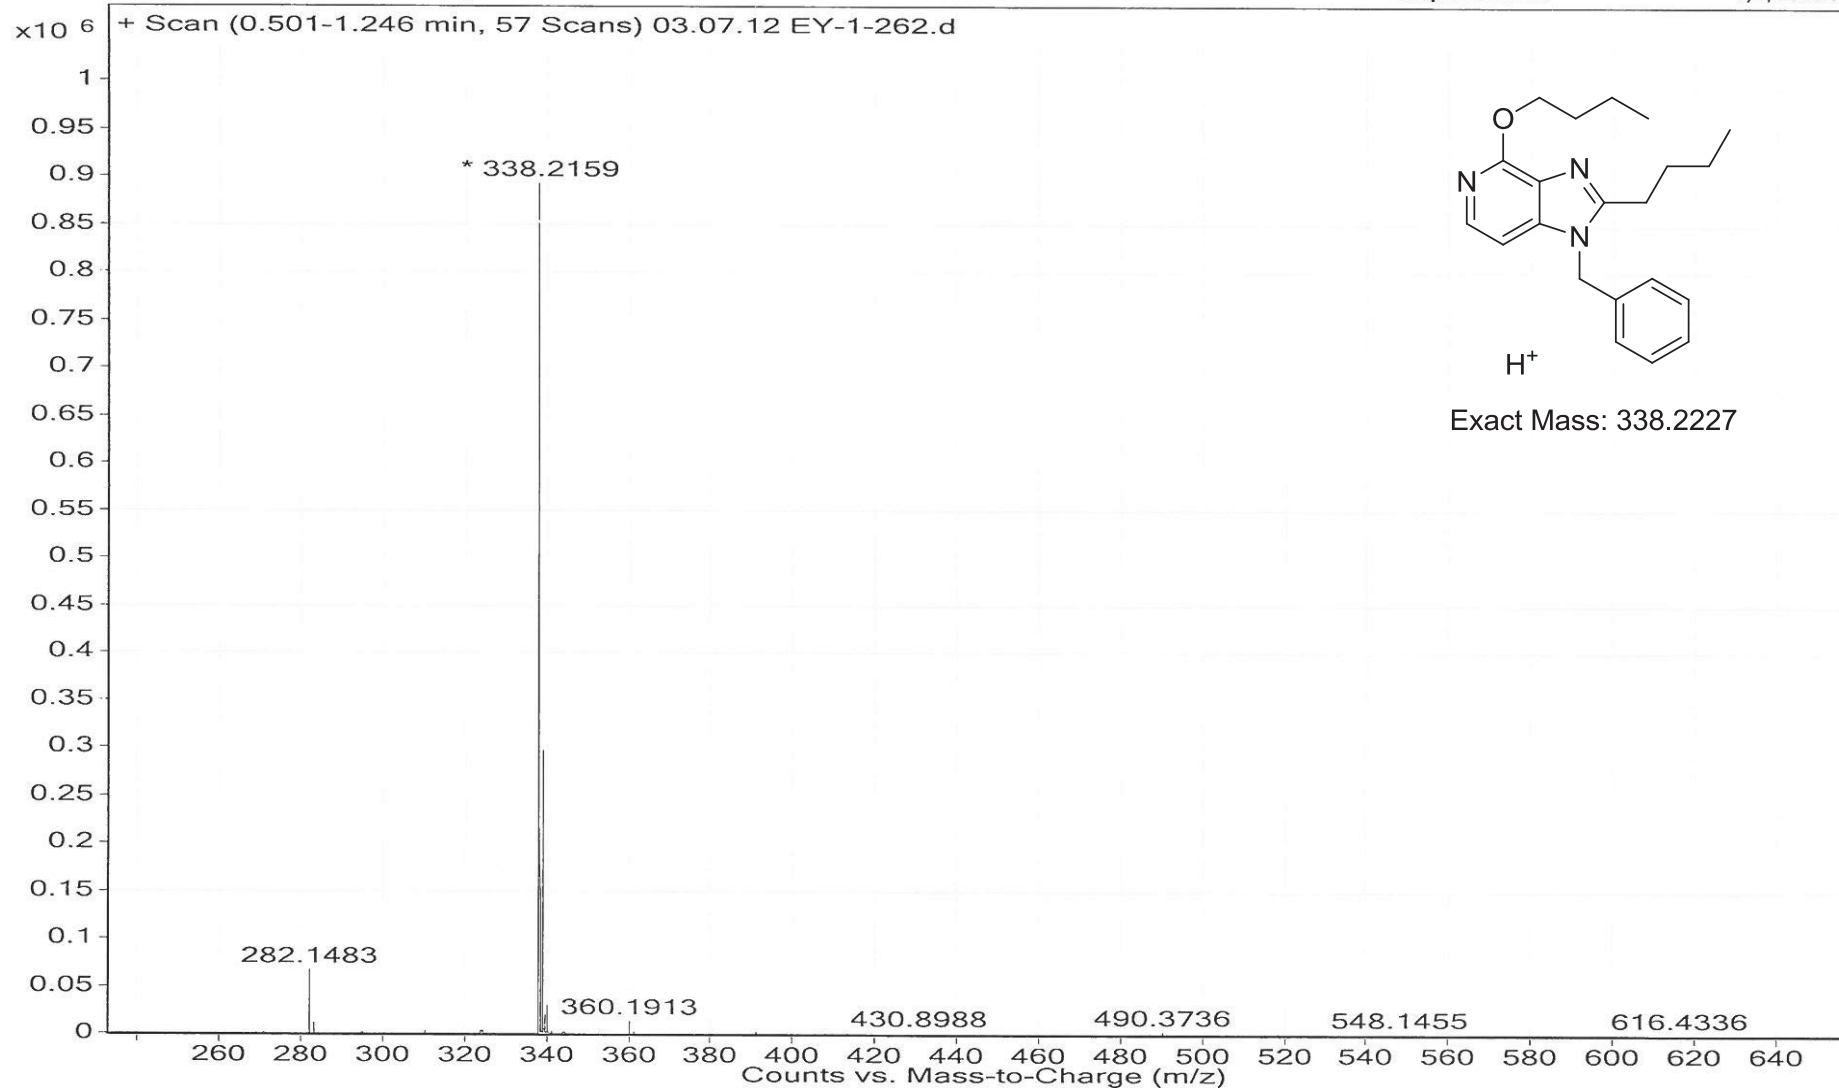

# 11c LC-MS

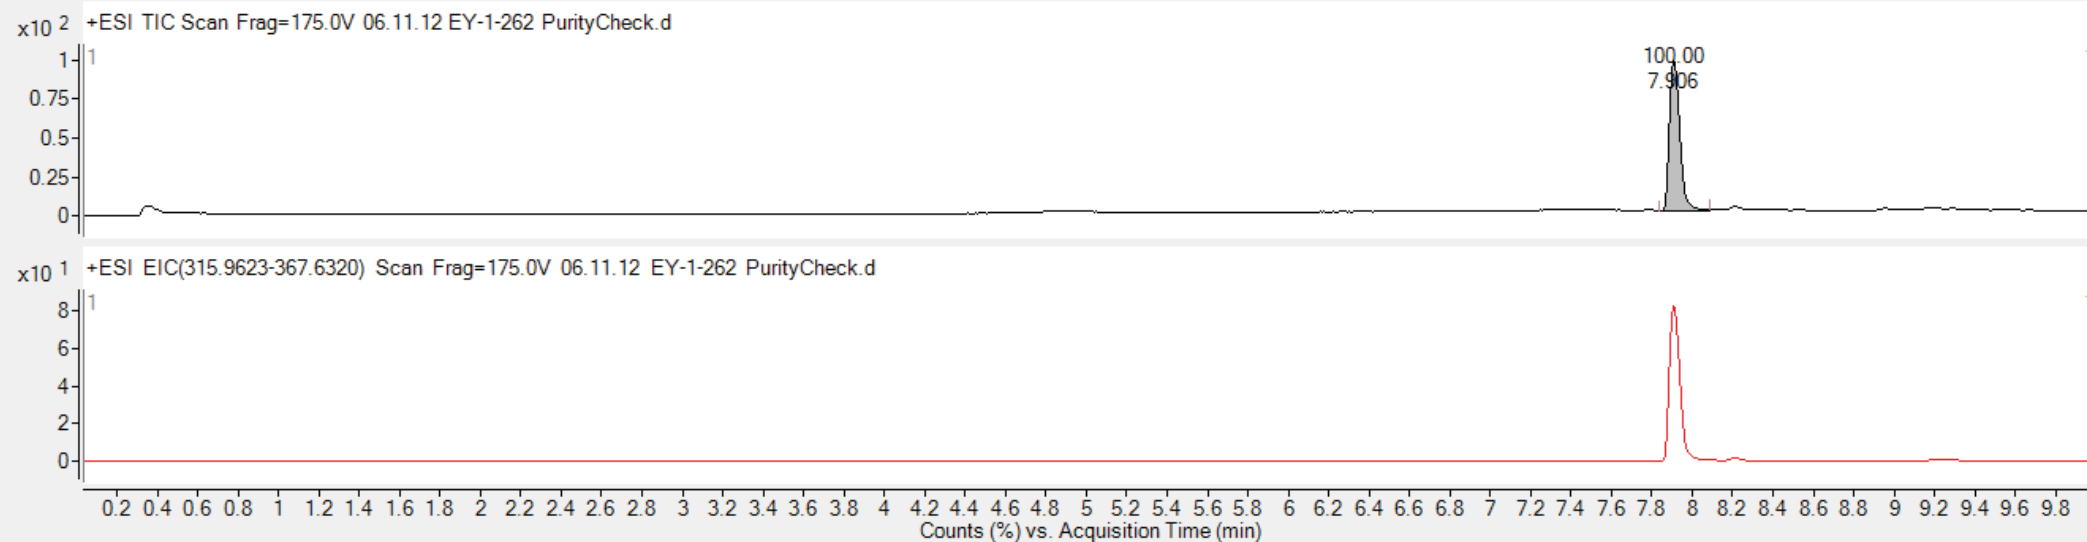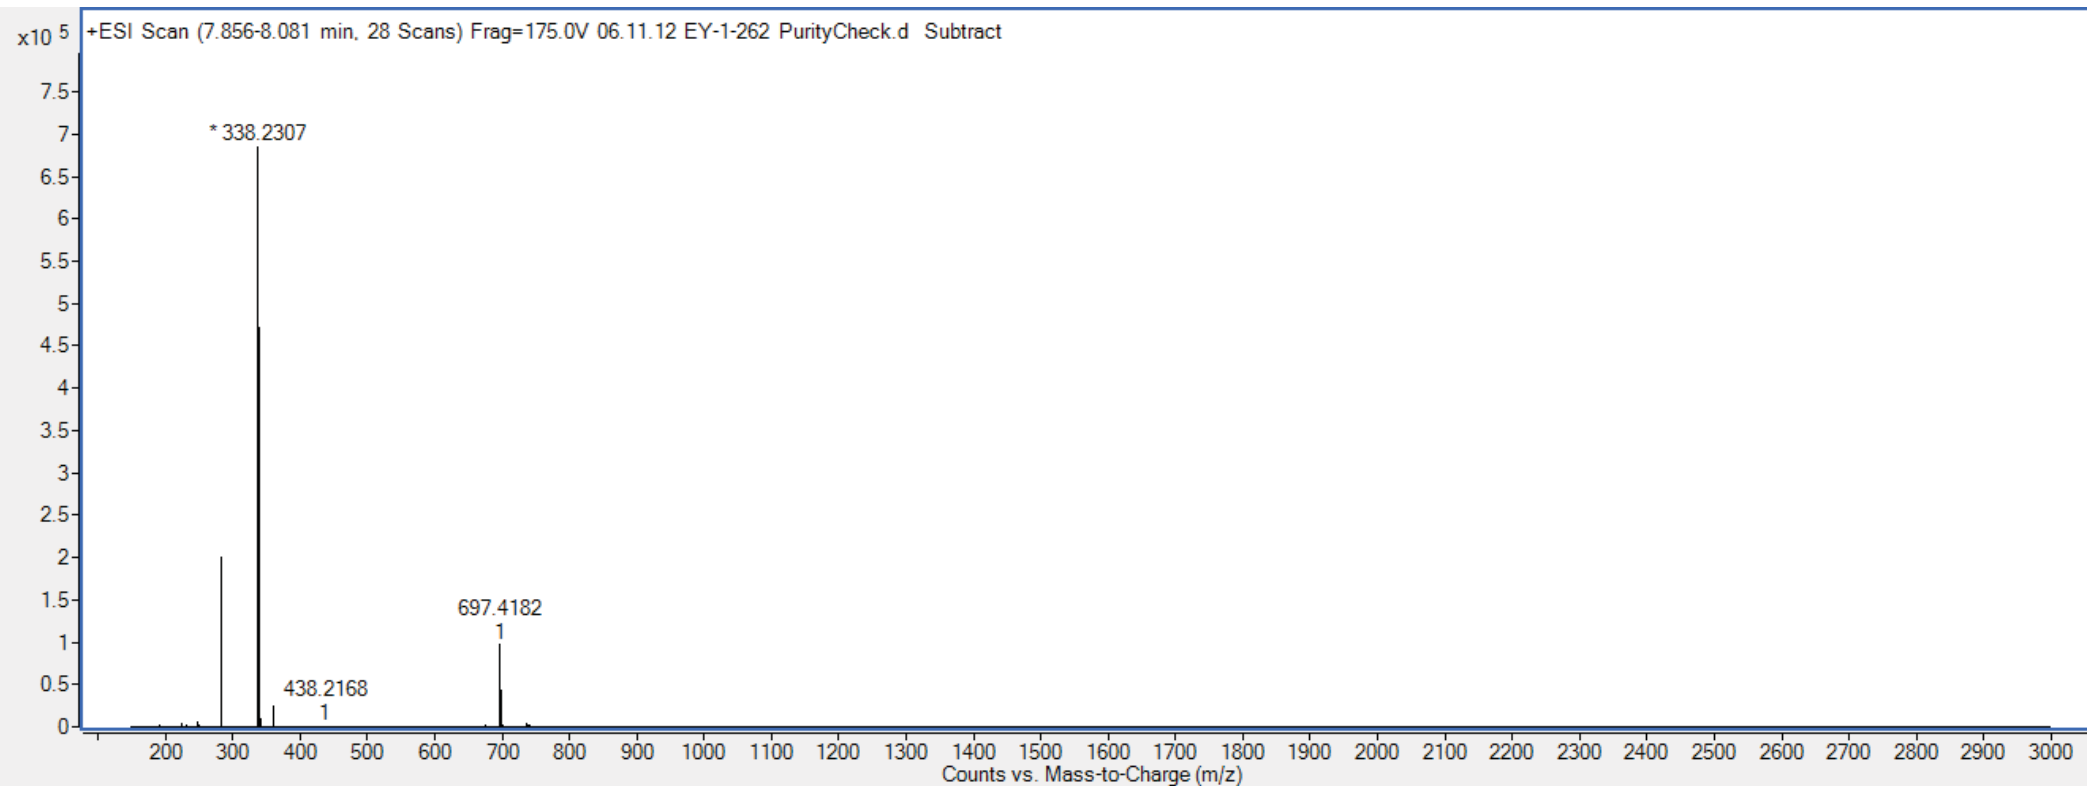

# 12 <sup>1</sup>H NMR

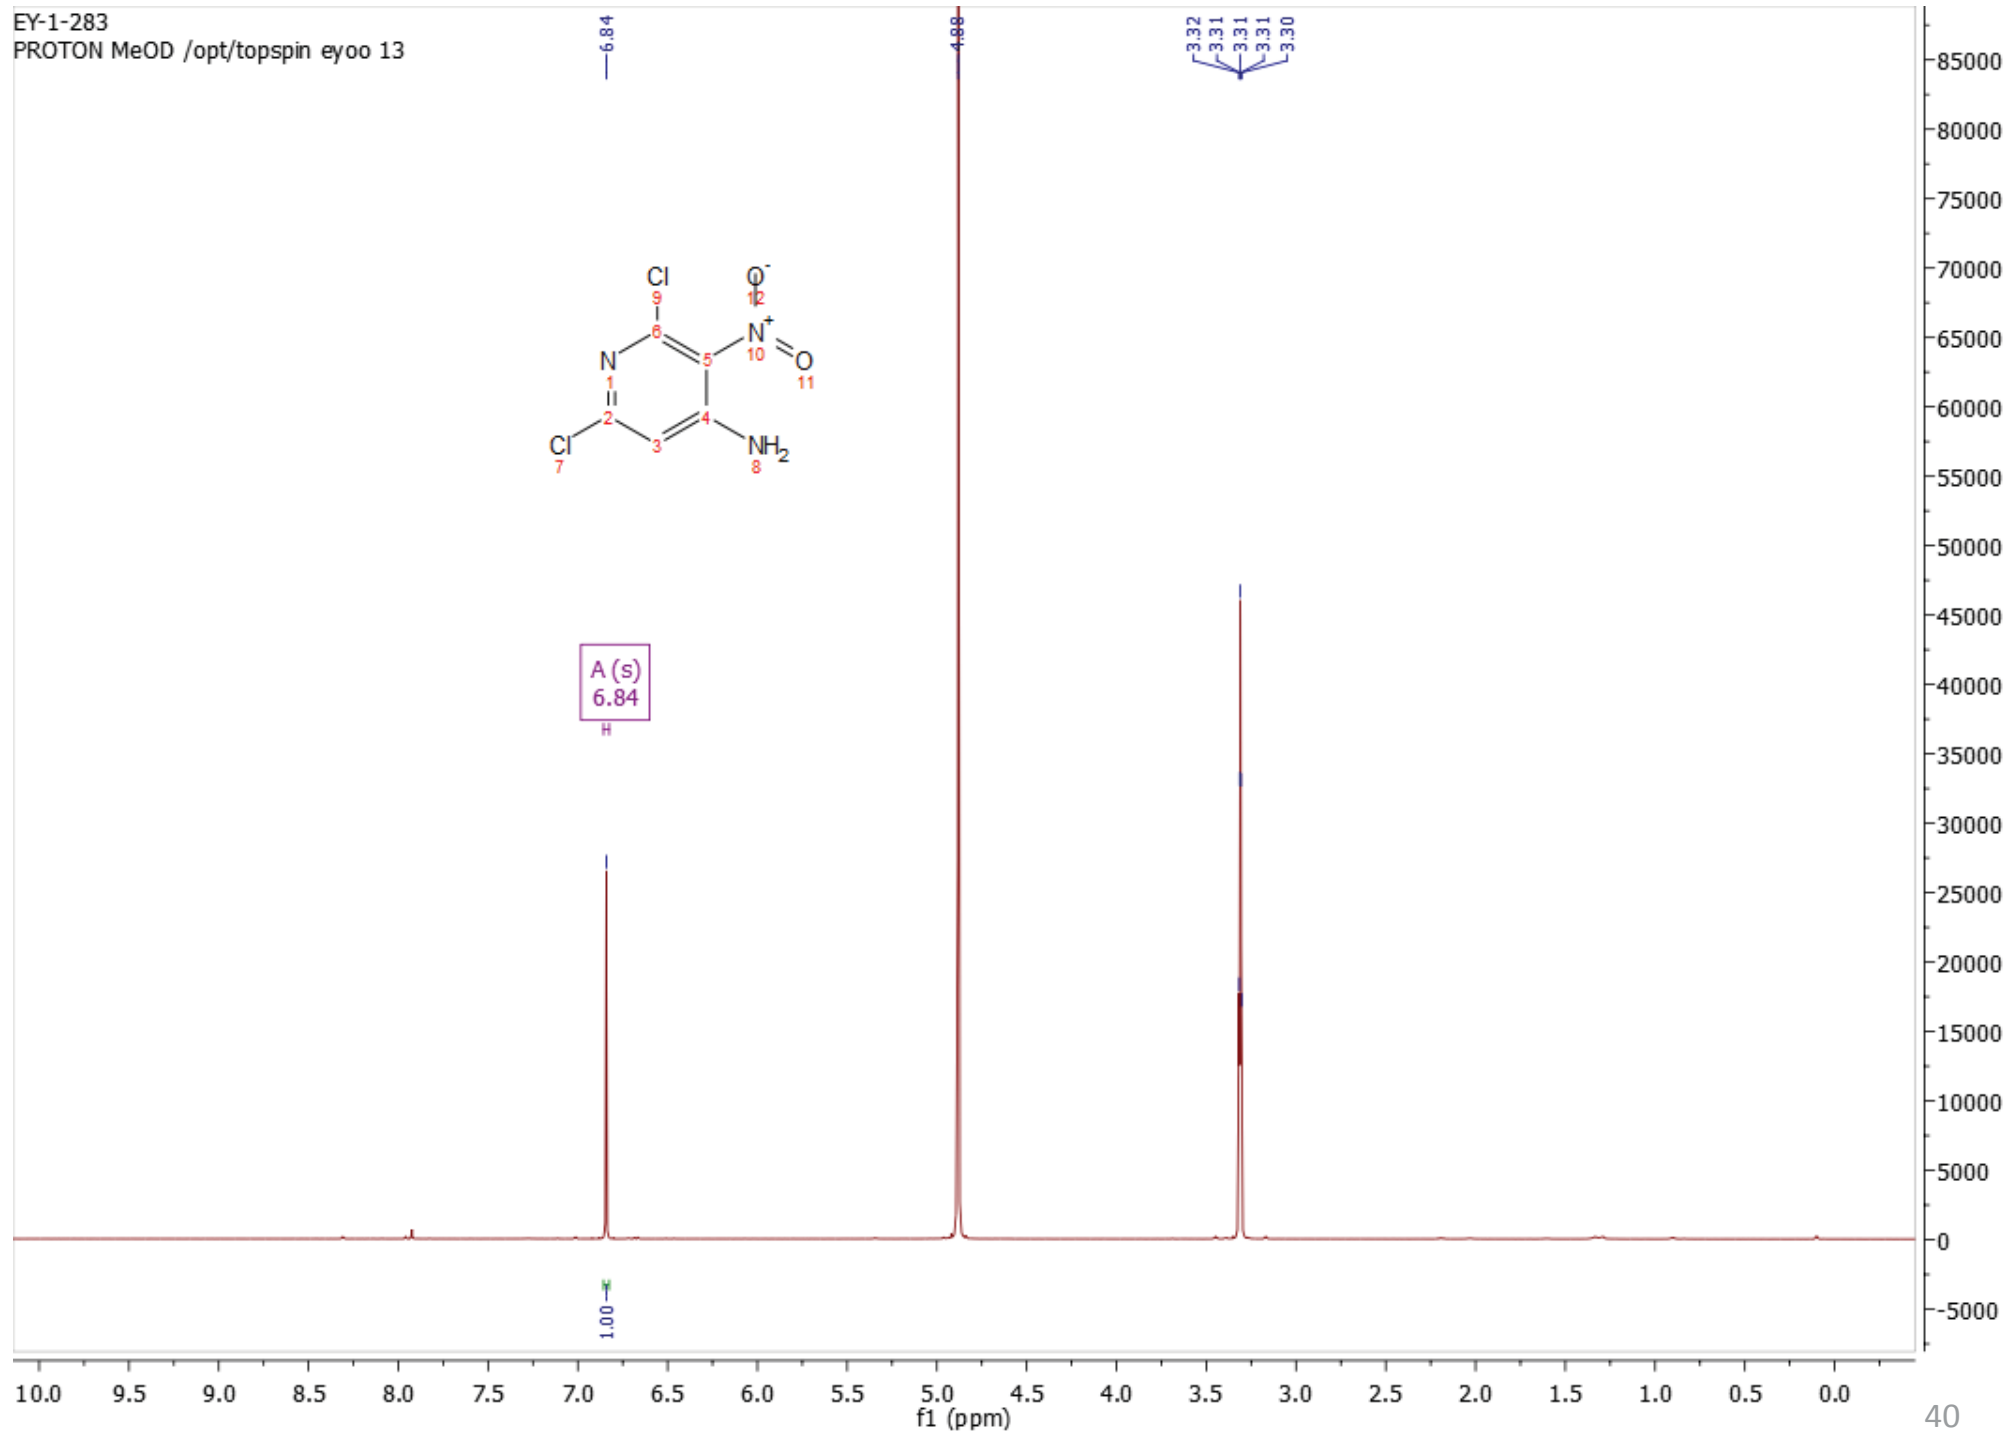

# <sup>12</sup><sup>13</sup>C NMR

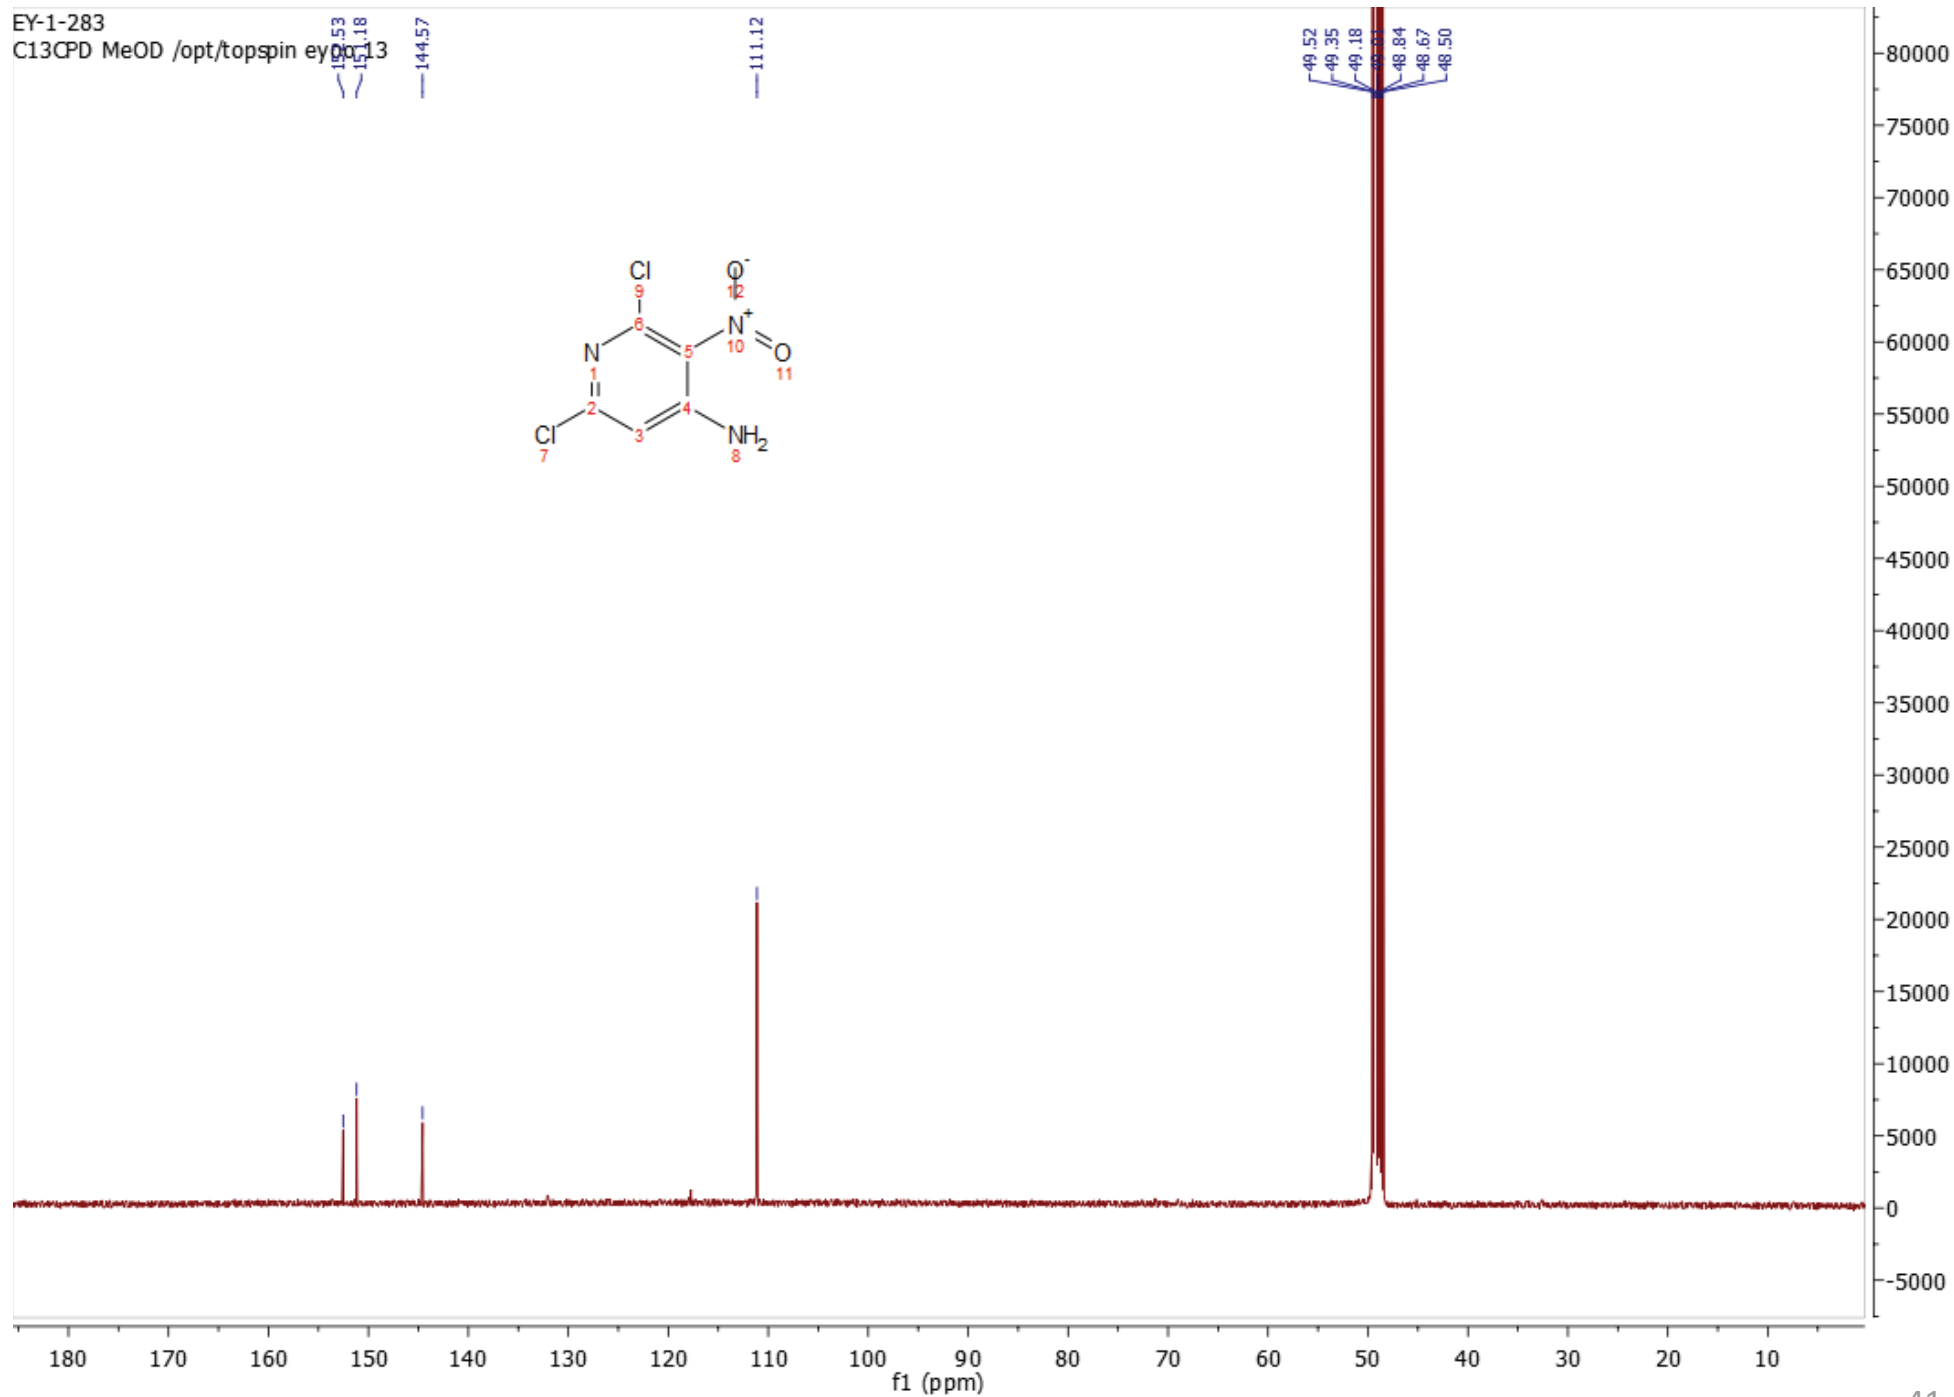

# 13 <sup>1</sup>H NMR

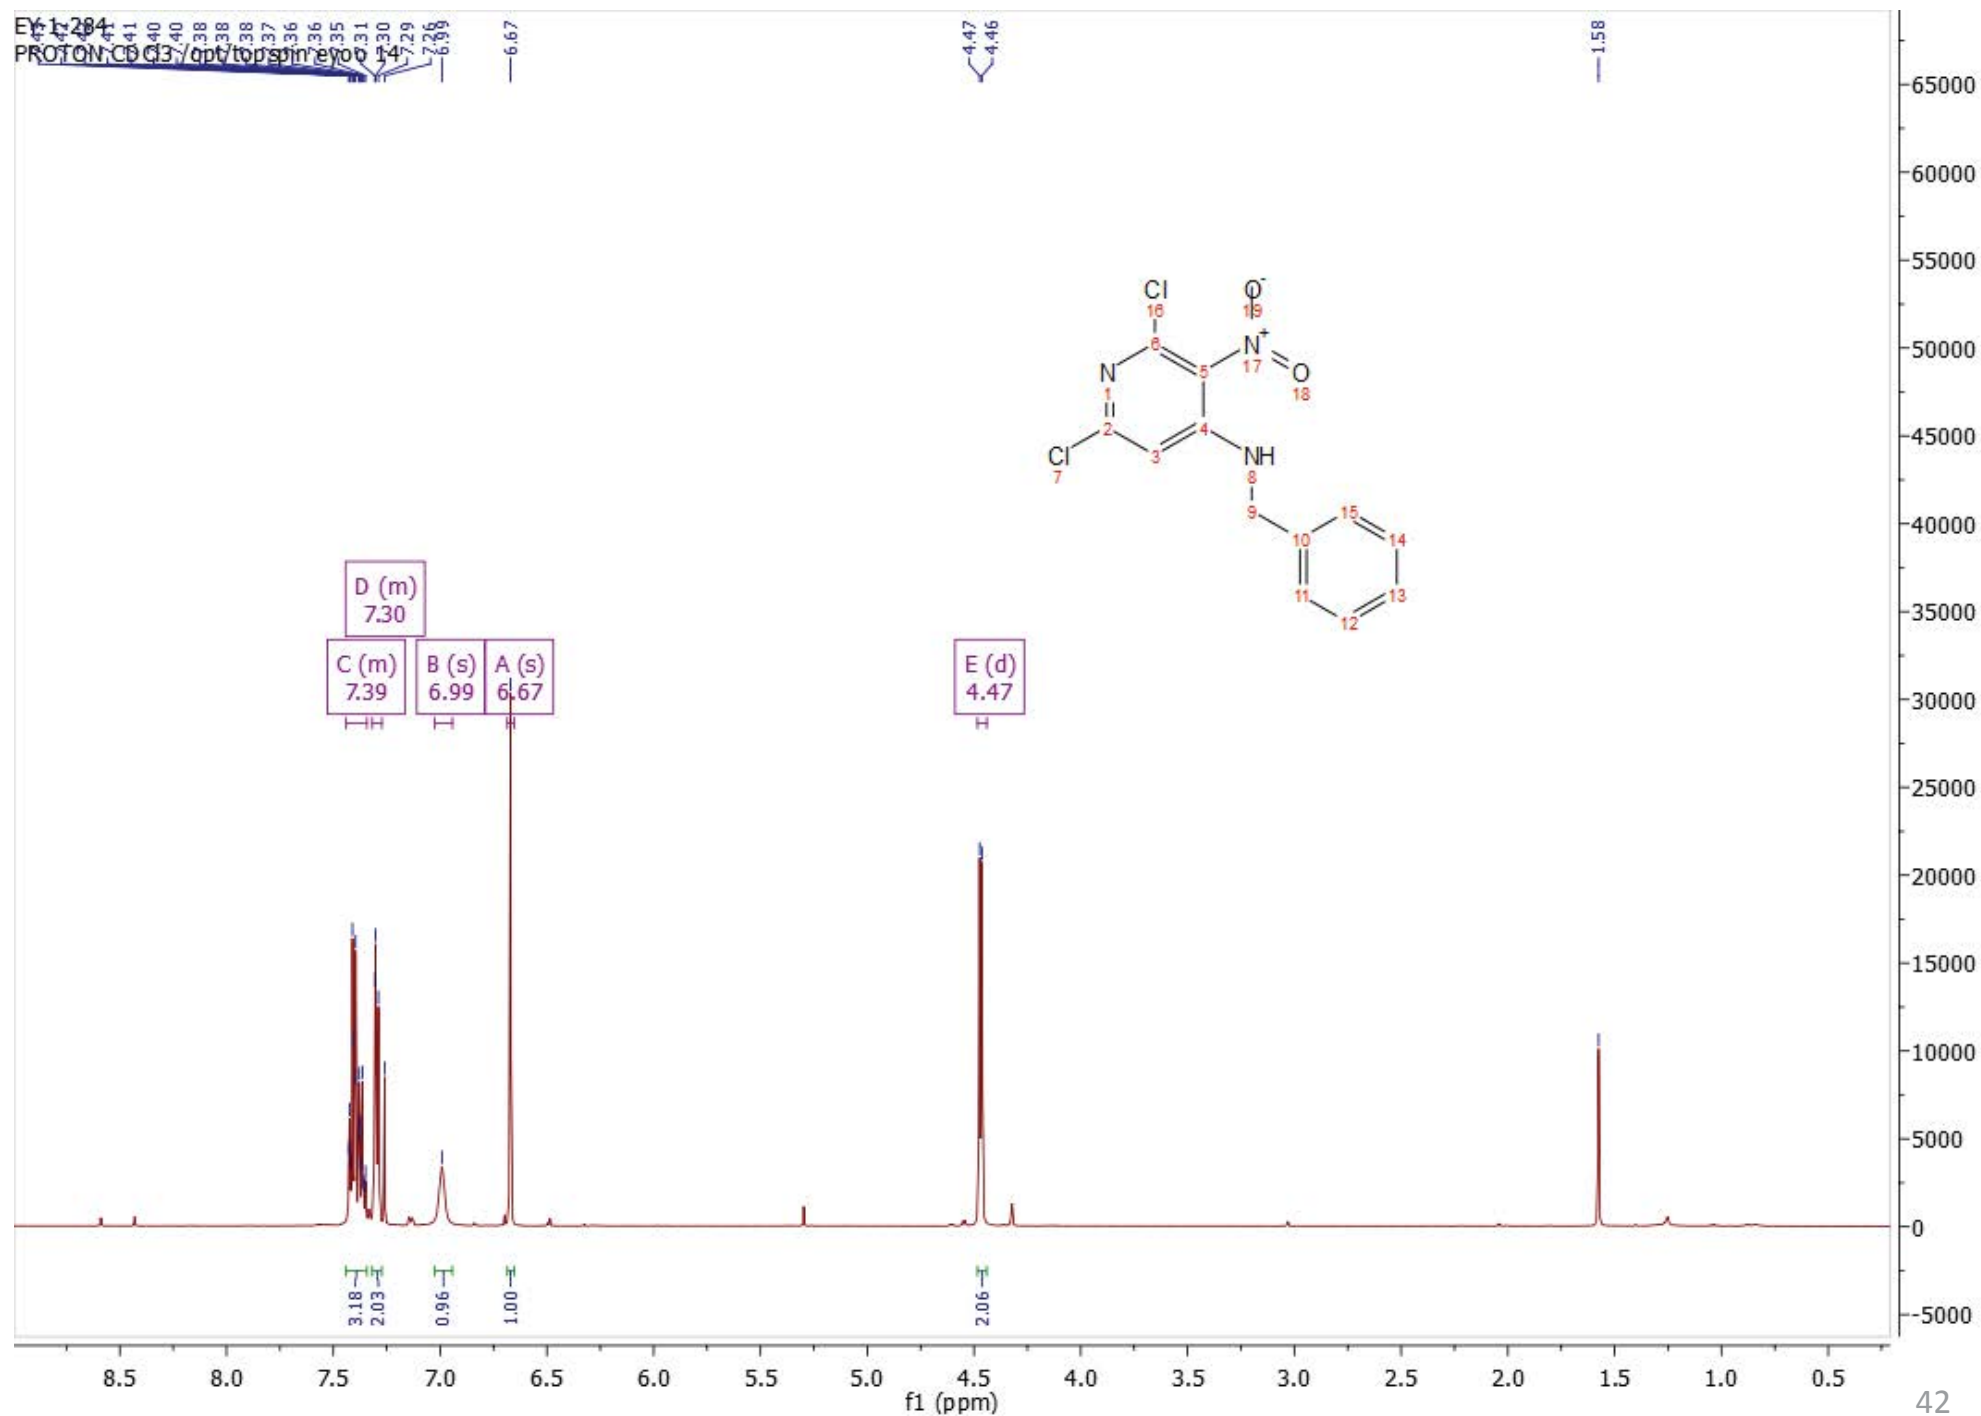

# <sup>13</sup>C NMR

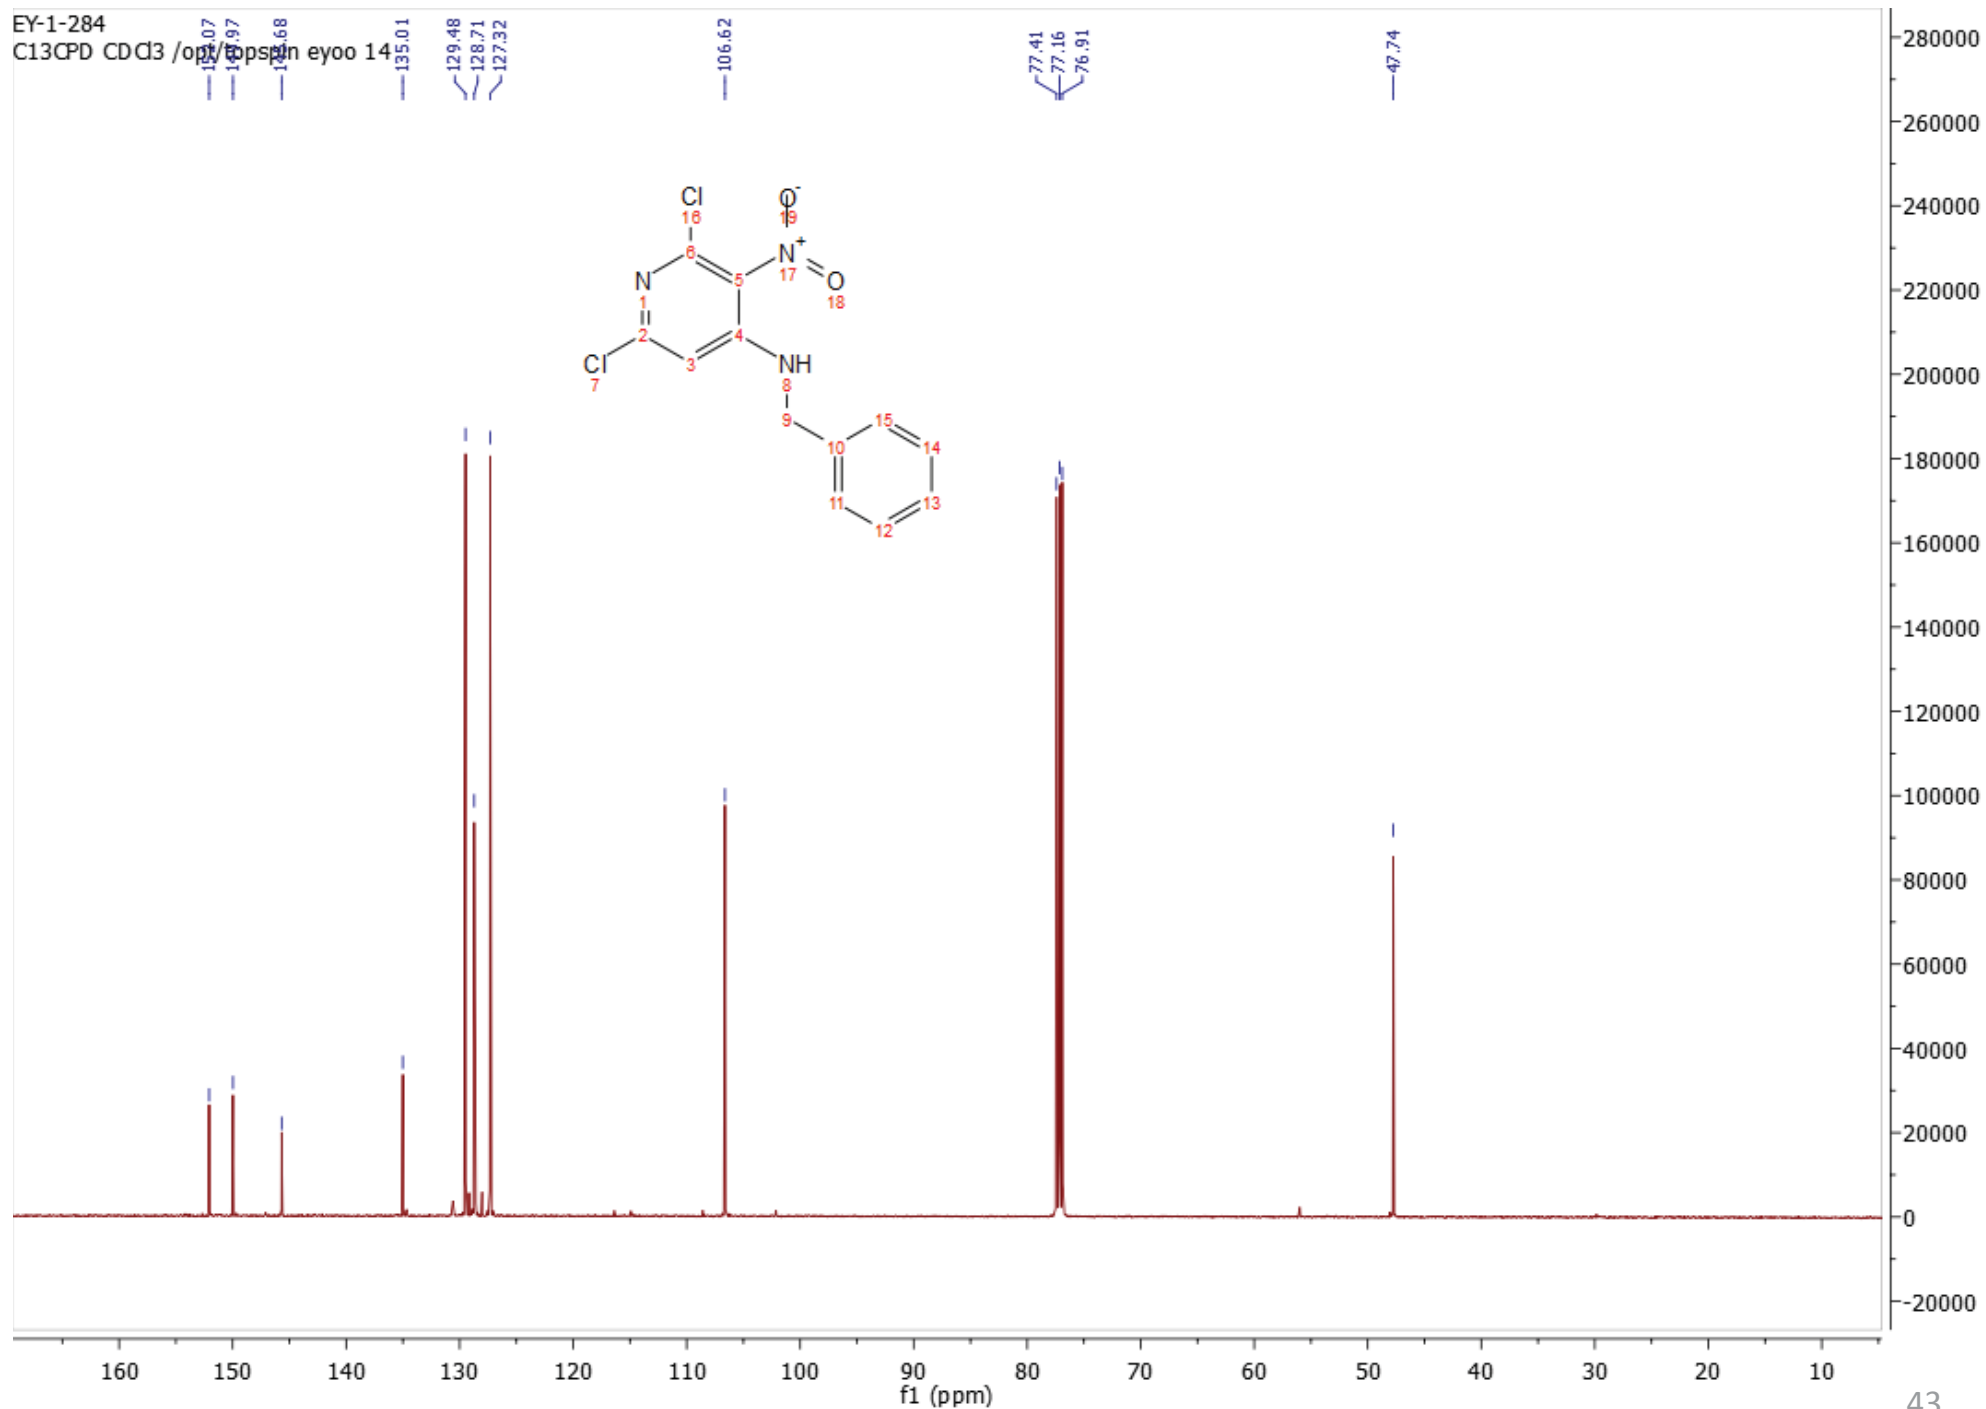



# 14 <sup>1</sup>H NMR

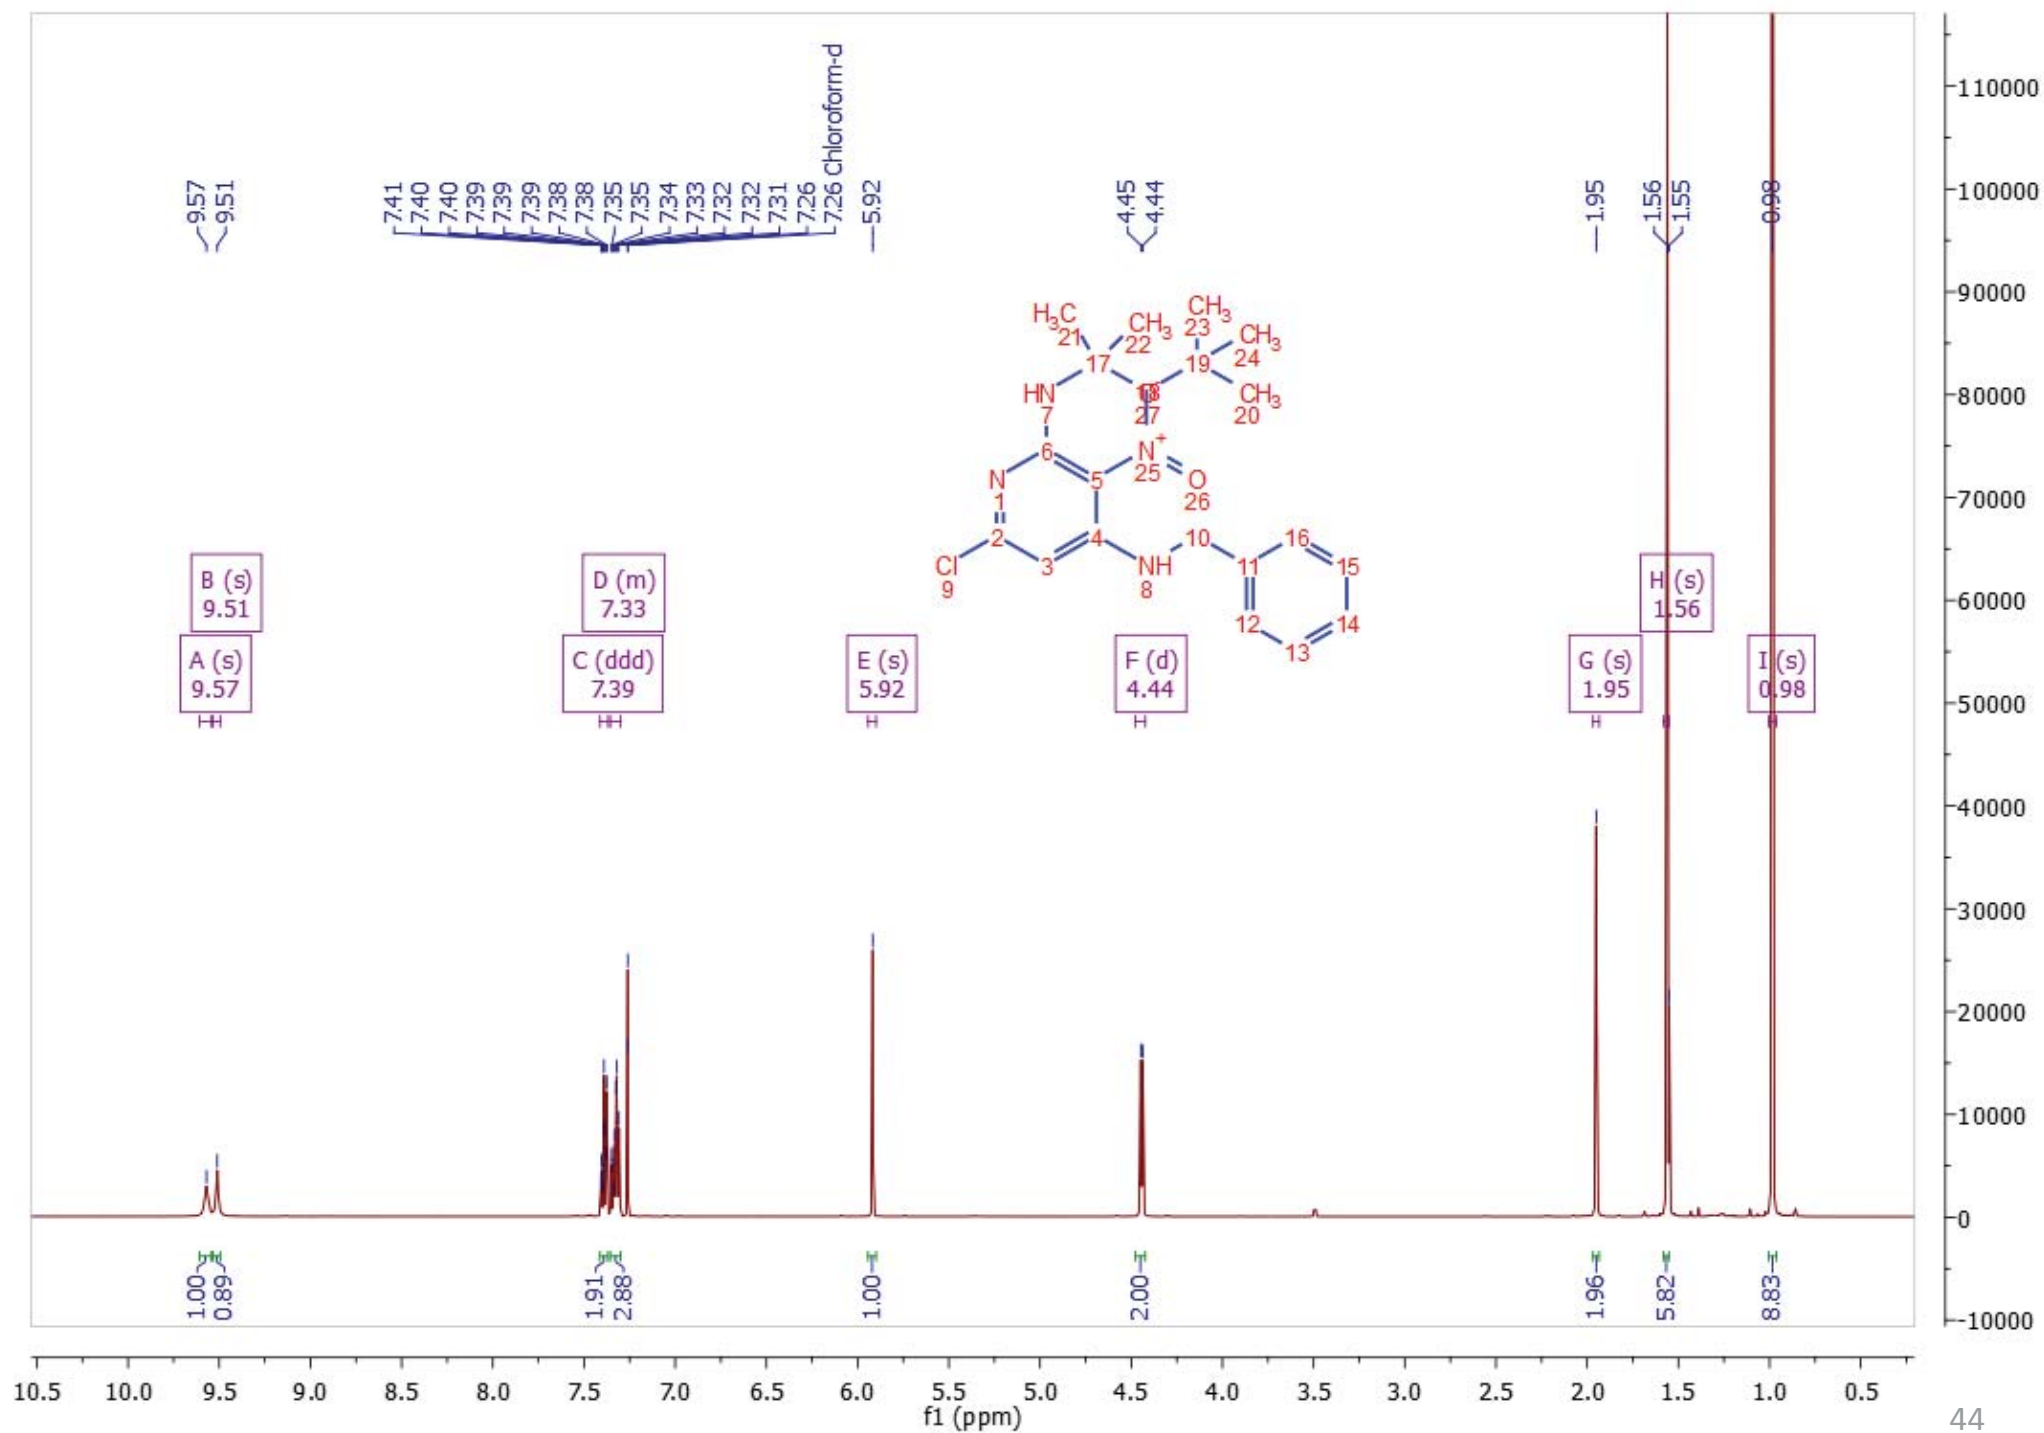

# <sup>14</sup> <sup>13</sup>C NMR

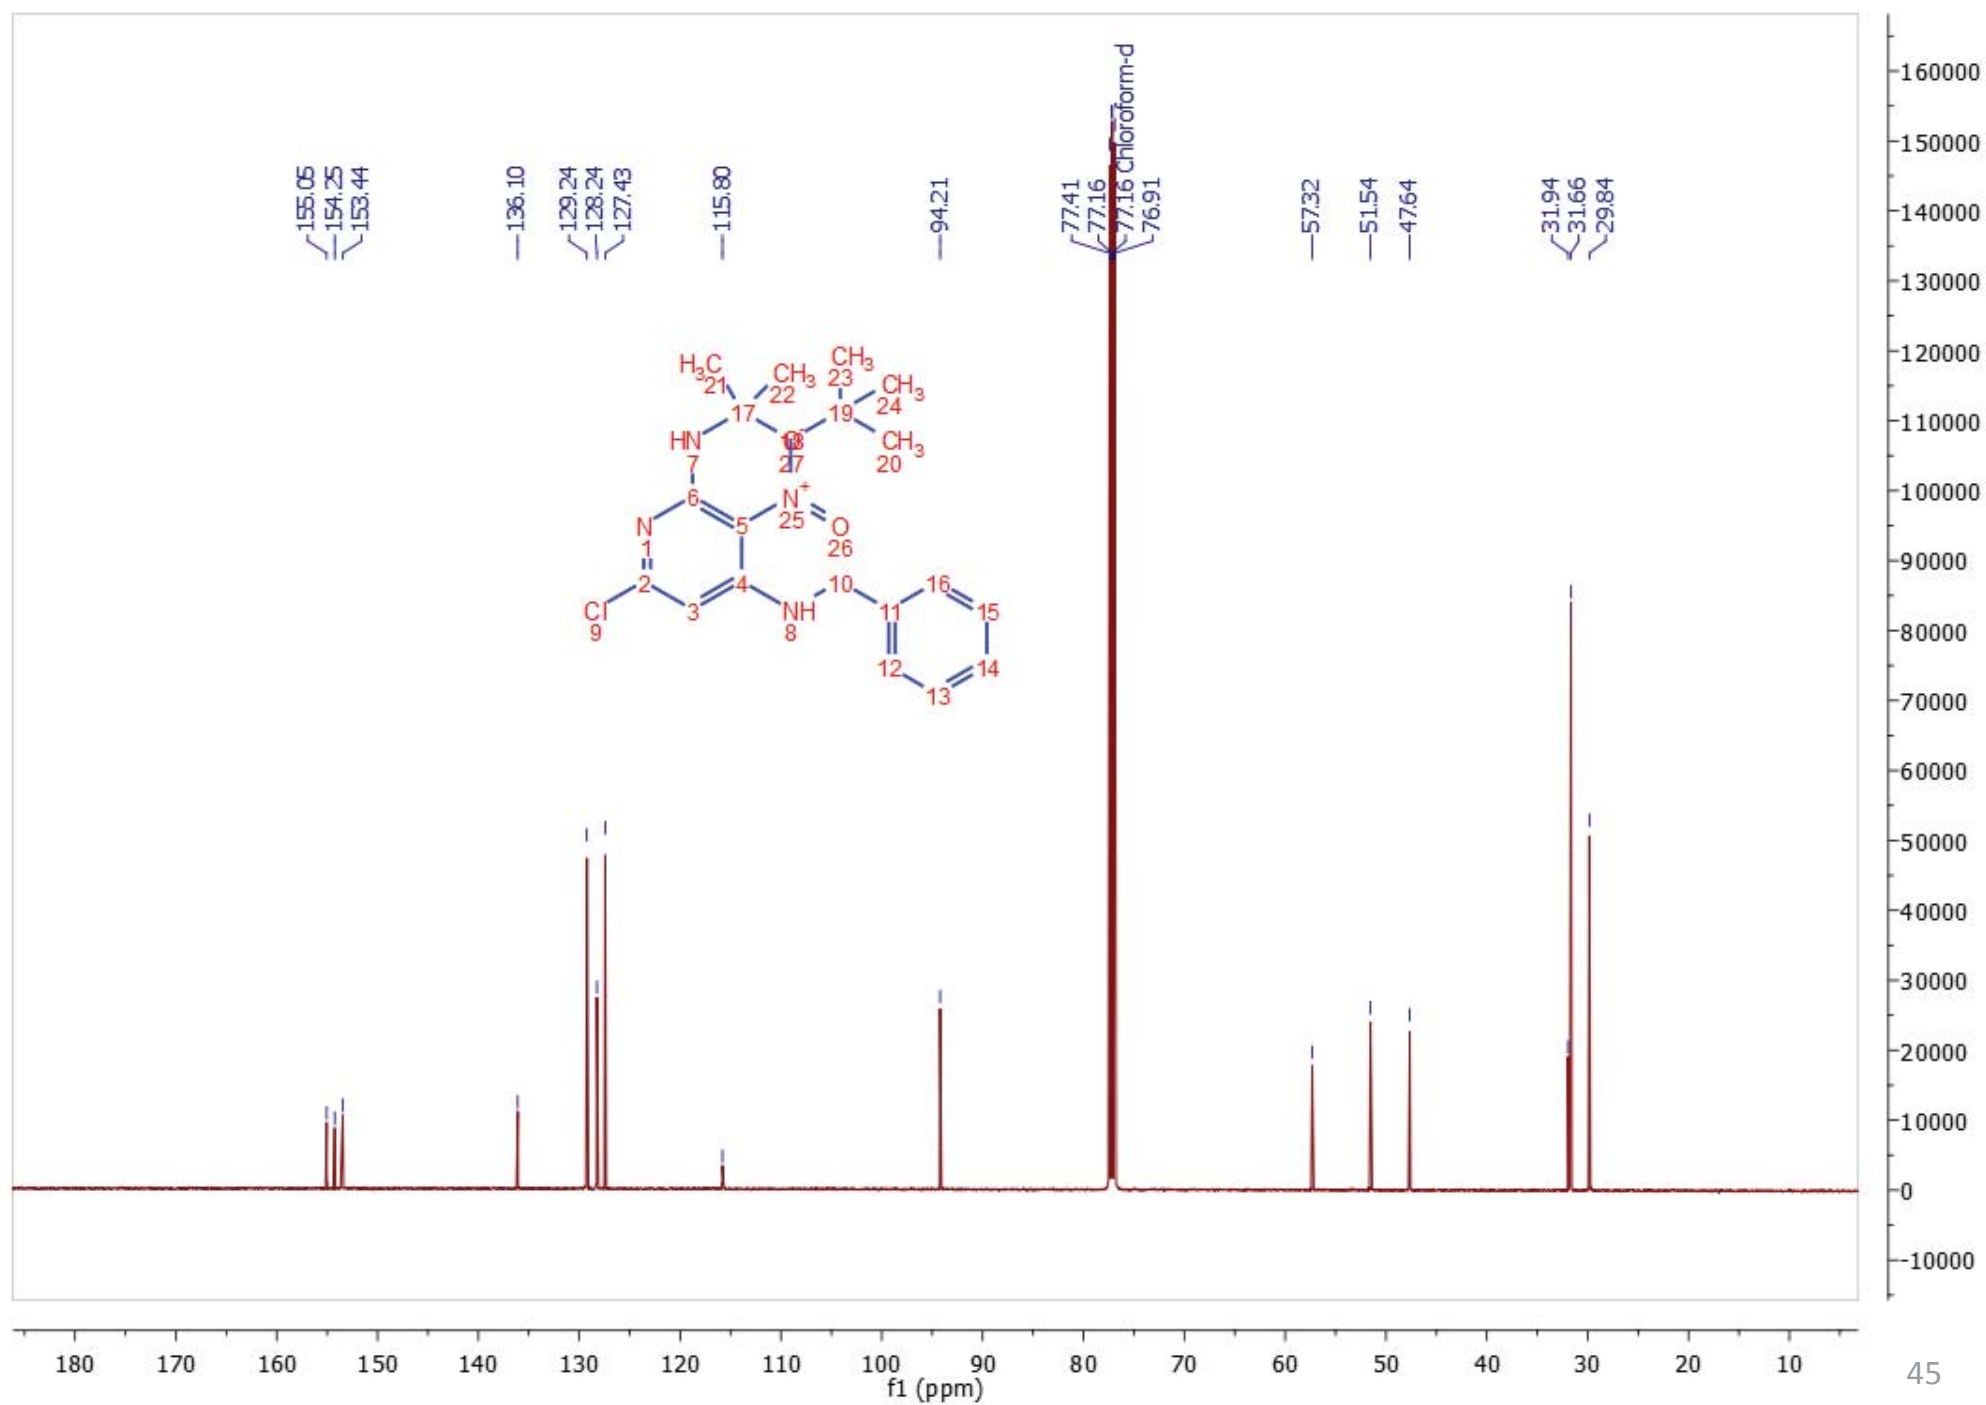

# 14 MS

|               |                     |             |                      |                 |              |                        |                     |
|---------------|---------------------|-------------|----------------------|-----------------|--------------|------------------------|---------------------|
| Sample Name   | 04.09.12 EY-1-285   | Position    | Vial 1               | Instrument Name | Instrument 1 | User Name              |                     |
| Inj Vol       | -1                  | InjPosition |                      | SampleType      | Sample       | IRM Calibration Status | Success             |
| Data Filename | 04.09.12 EY-1-285.d | ACQ Method  | Water-ACN Infusion M | Comment         |              | Acquired Time          | 4/9/2012 1:13:16 PM |

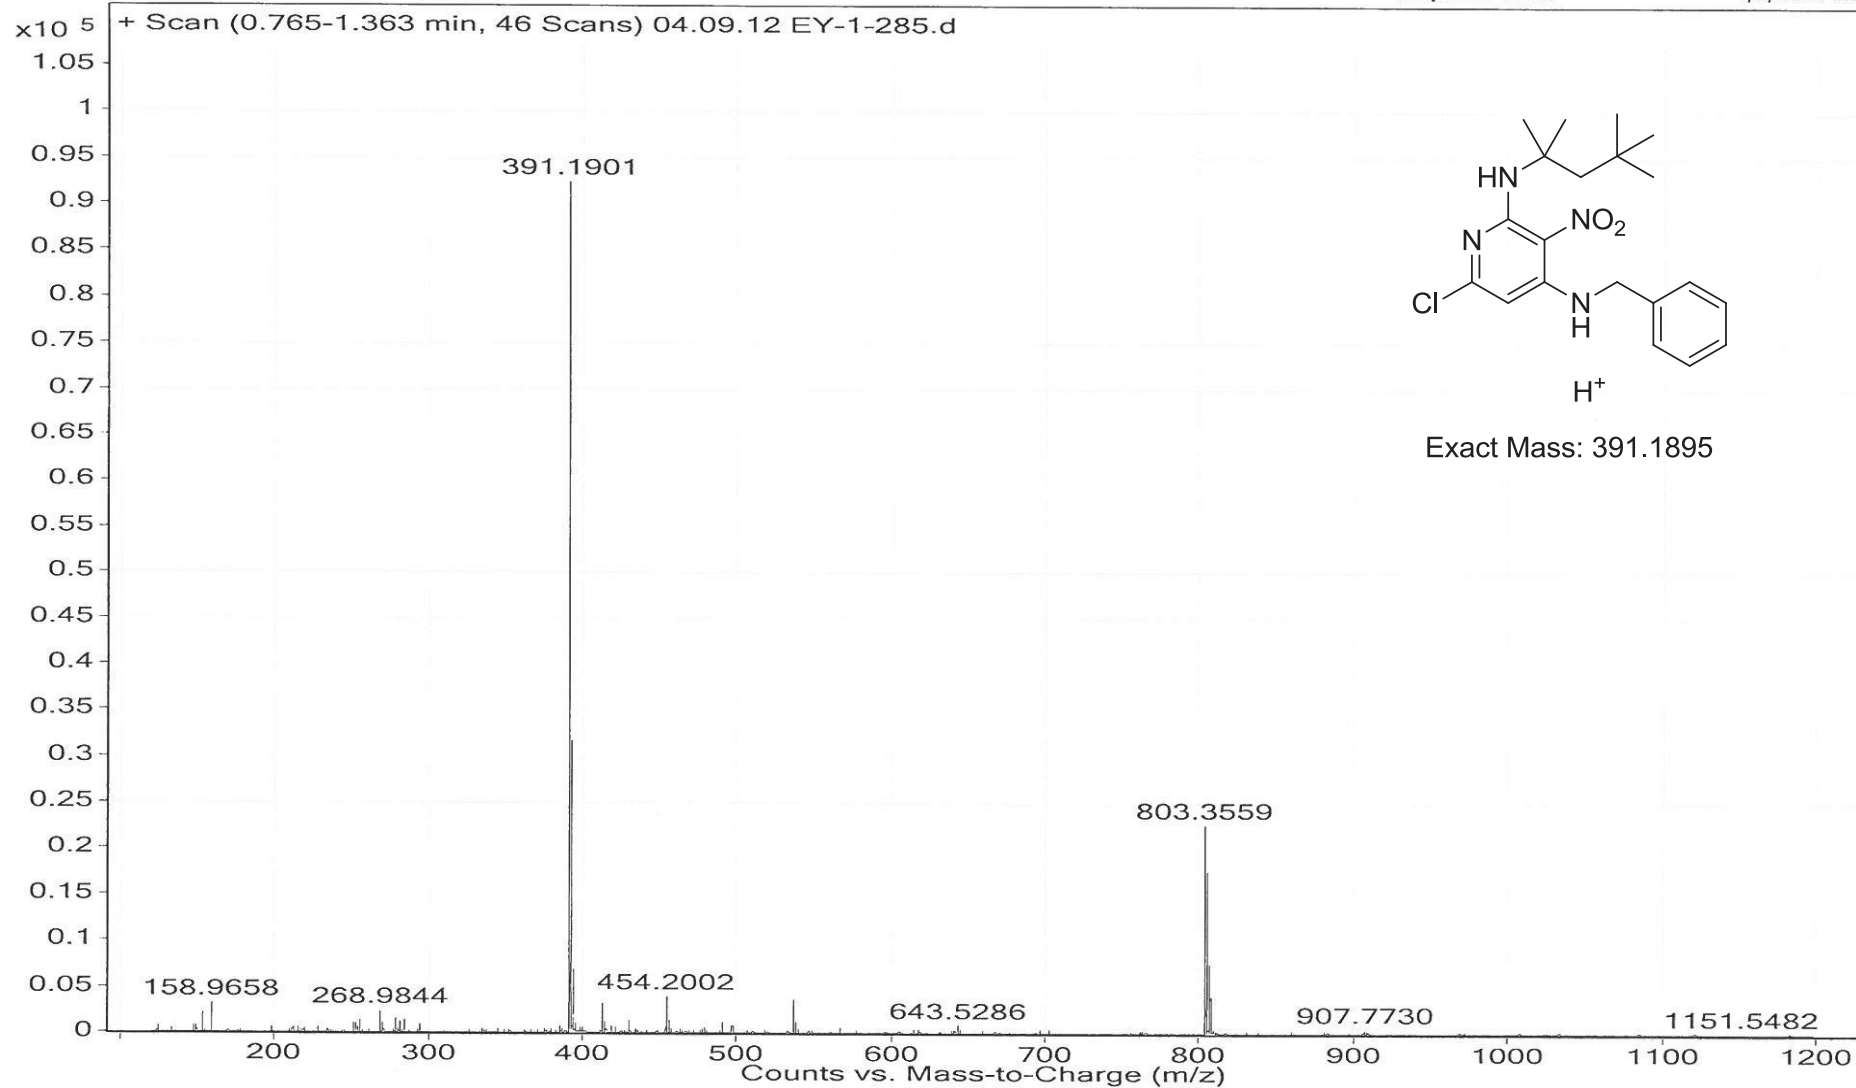

# 15 MS

|               |                    |             |                      |                 |              |                        |                      |
|---------------|--------------------|-------------|----------------------|-----------------|--------------|------------------------|----------------------|
| Sample Name   | 05.08.12 EY-2-25   | Position    | Vial 1               | Instrument Name | Instrument 1 | User Name              |                      |
| Inj Vol       | -1                 | InjPosition |                      | SampleType      | Sample       | IRM Calibration Status | Success              |
| Data Filename | 05.08.12 EY-2-25.d | ACQ Method  | Water-ACN Infusion M | Comment         |              | Acquired Time          | 5/8/2012 10:20:41 AM |

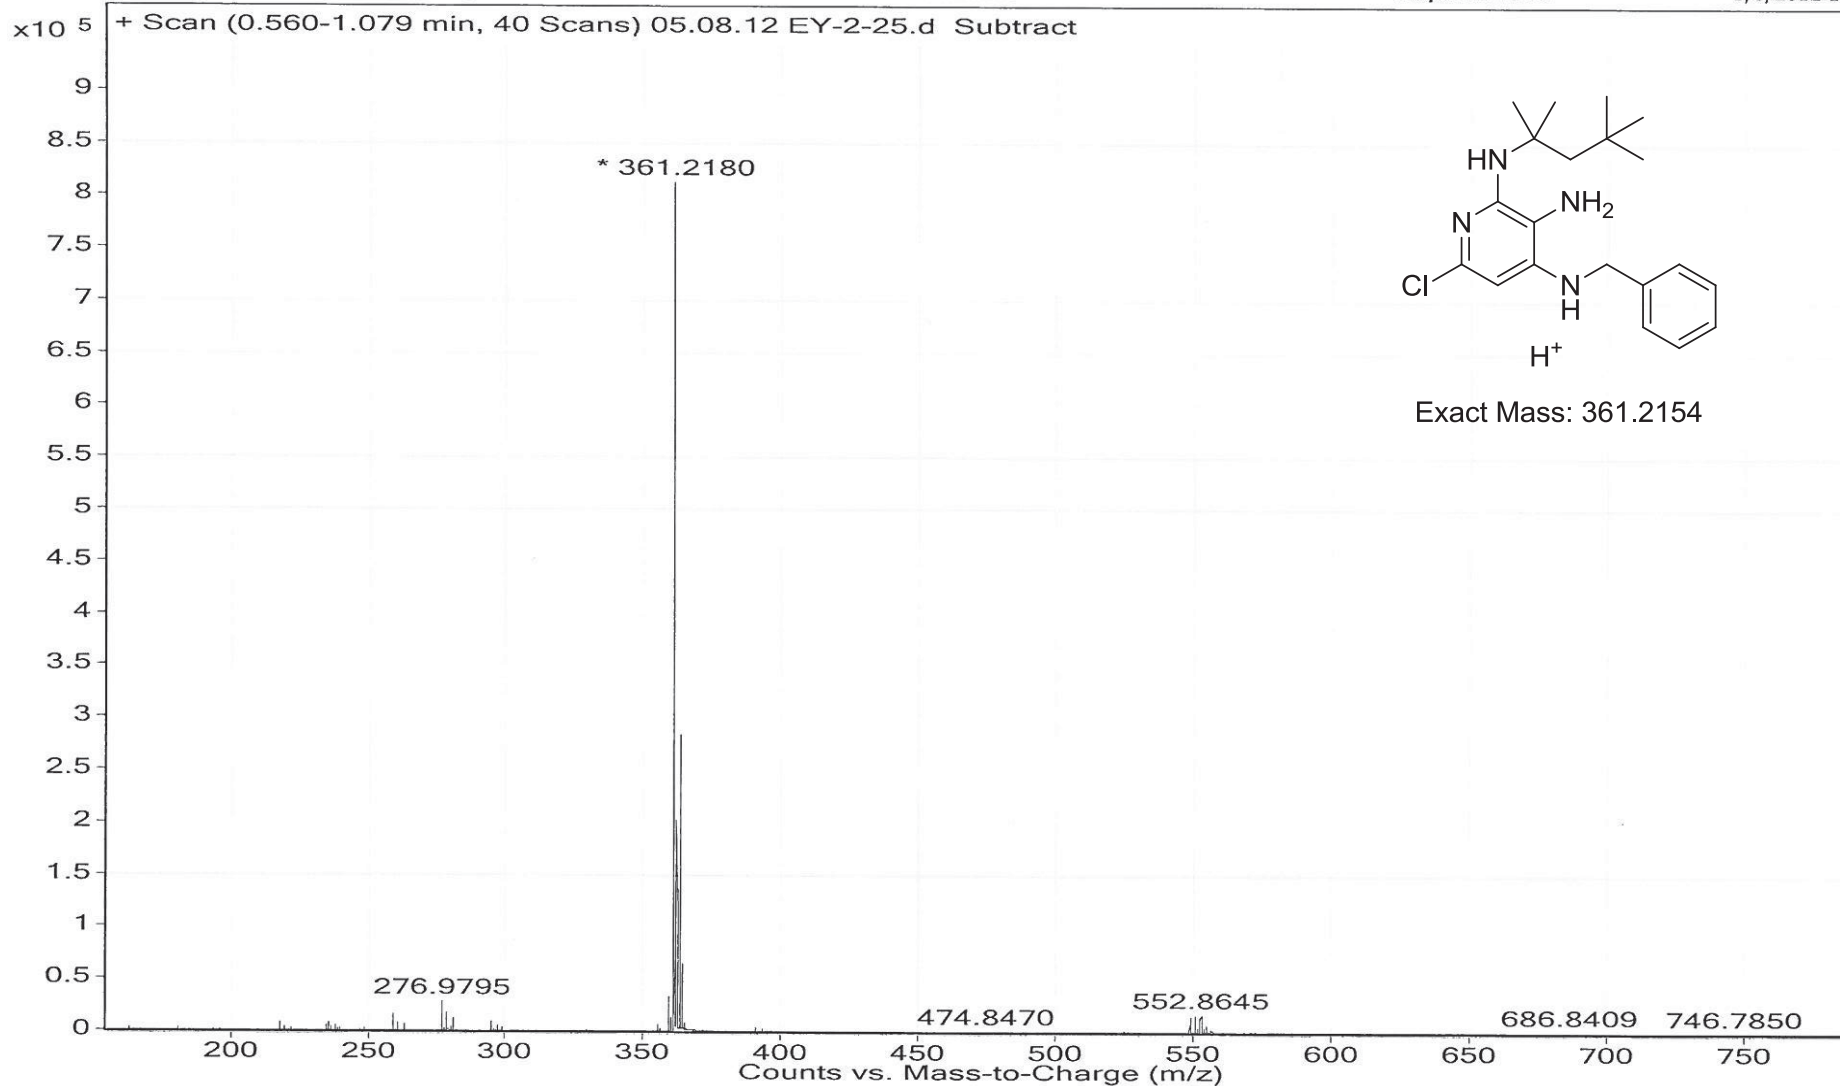

# 16 <sup>1</sup>H NMR

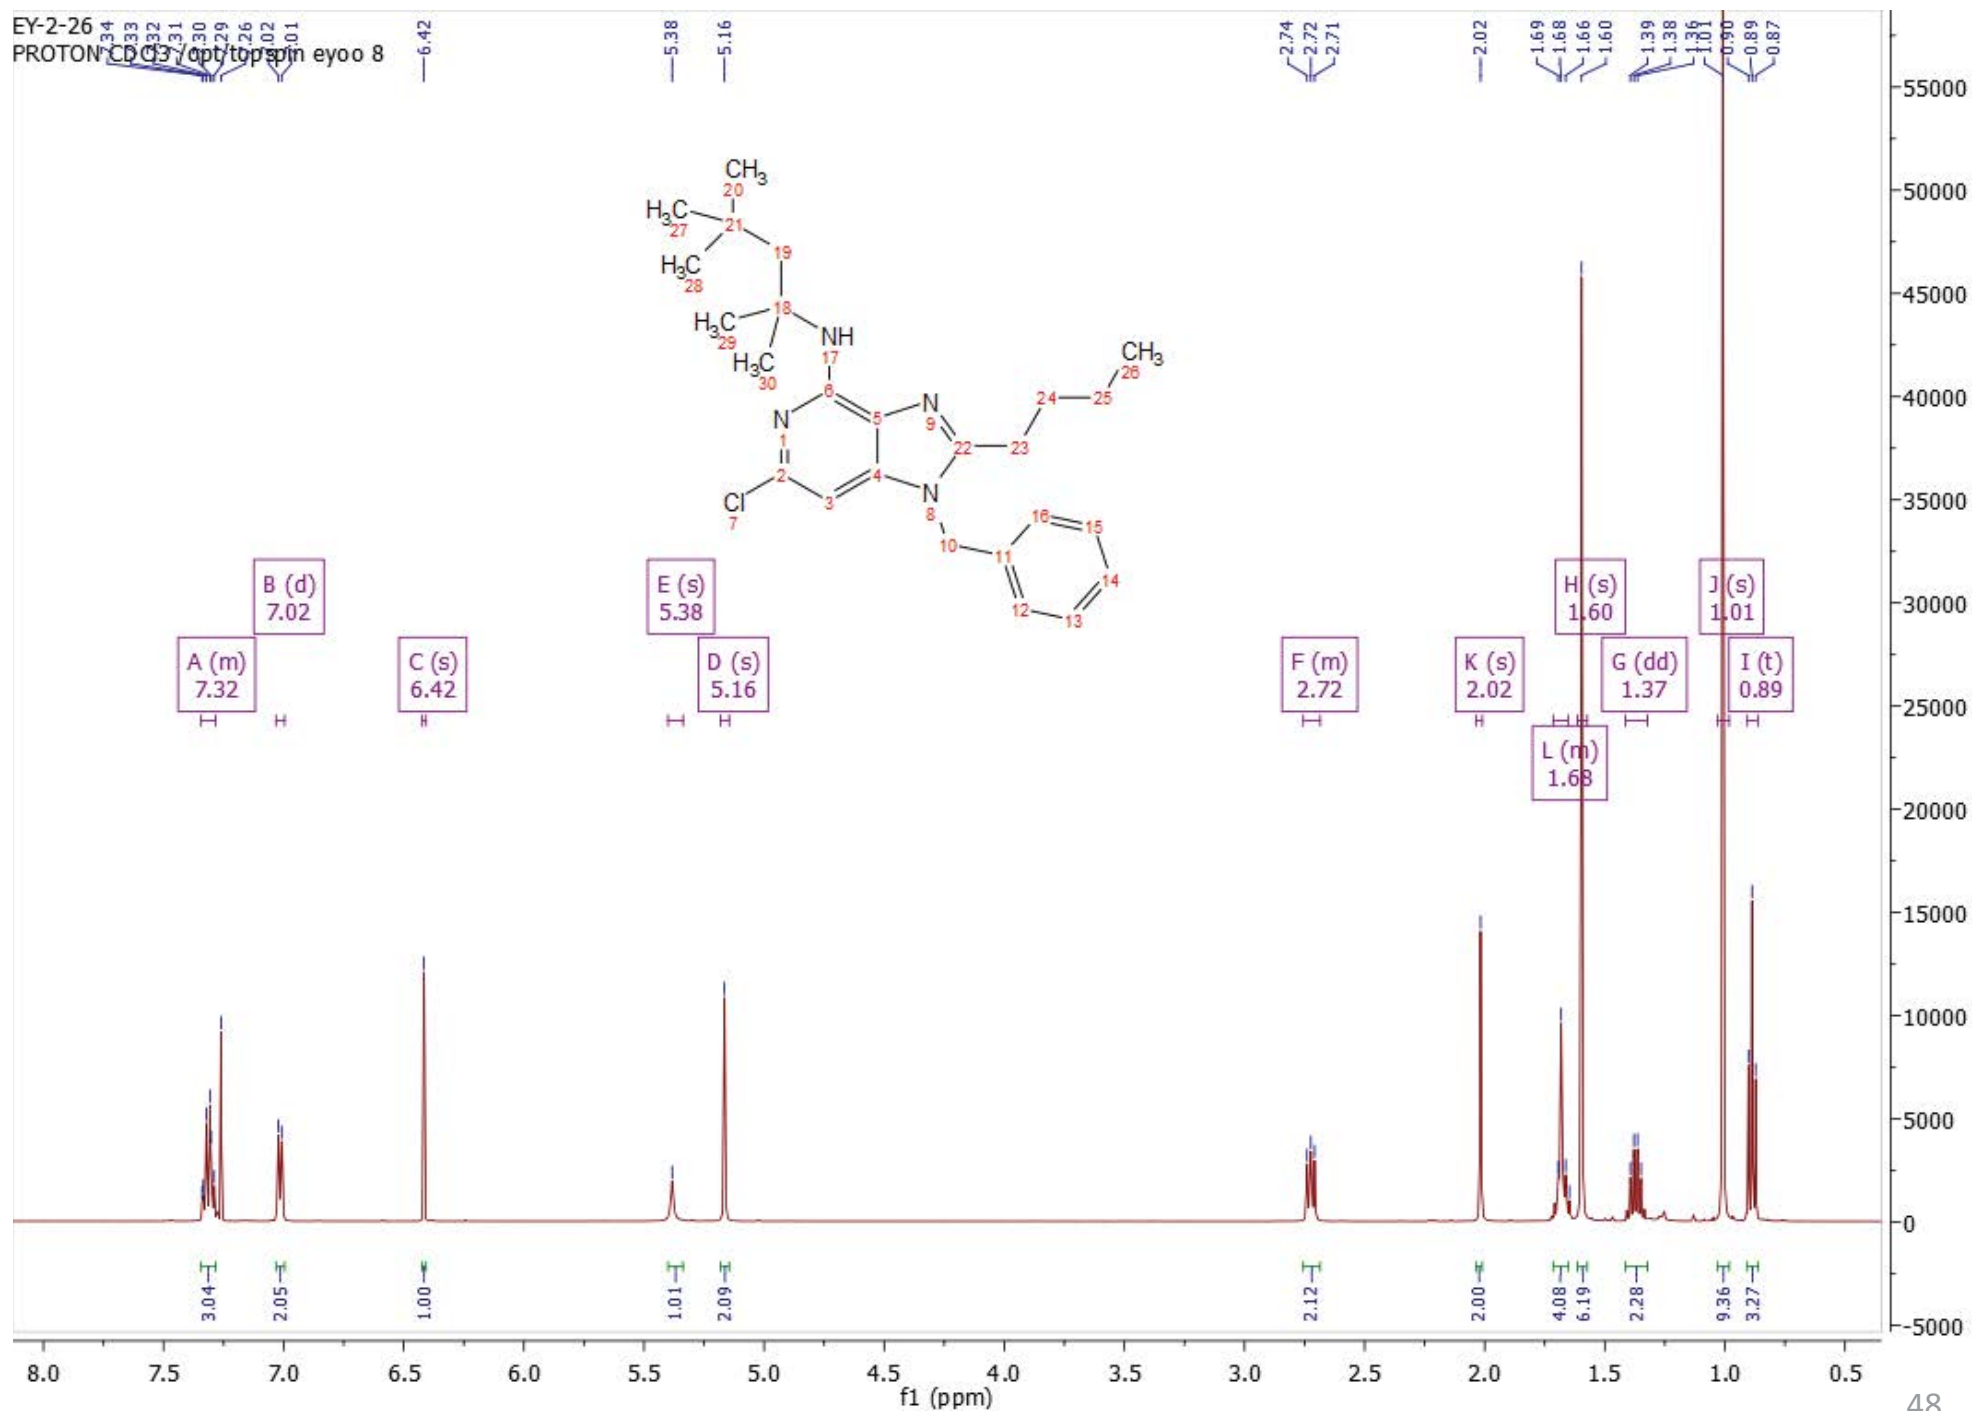

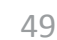

# 16 MS

|               |                      |             |                      |                 |              |                        |                     |
|---------------|----------------------|-------------|----------------------|-----------------|--------------|------------------------|---------------------|
| Sample Name   | 05.08.12 EY-2-26-2   | Position    | Vial 1               | Instrument Name | Instrument 1 | User Name              |                     |
| Inj Vol       | -1                   | InjPosition |                      | SampleType      | Sample       | IRM Calibration Status | Success             |
| Data Filename | 05.08.12 EY-2-26-2.d | ACQ Method  | Water-ACN Infusion M | Comment         |              | Acquired Time          | 5/8/2012 4:58:36 PM |

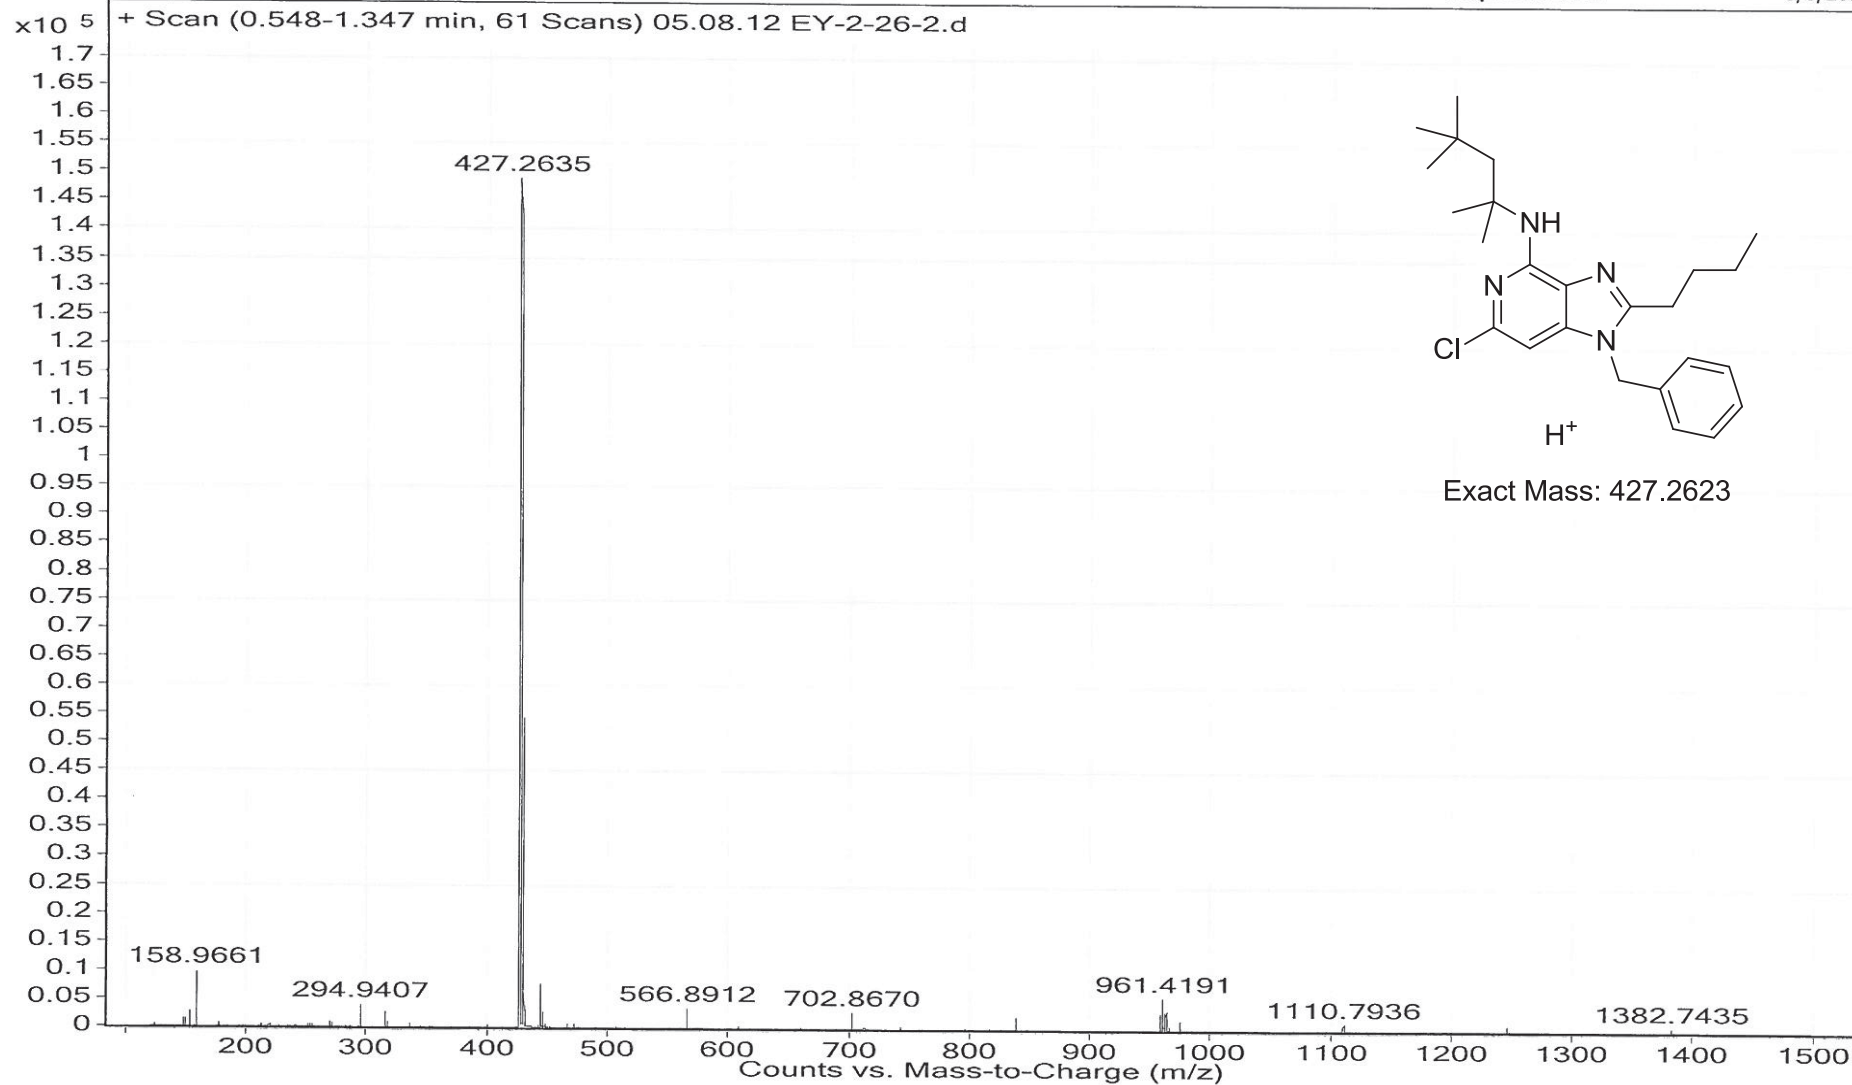



# 17 <sup>1</sup>H NMR

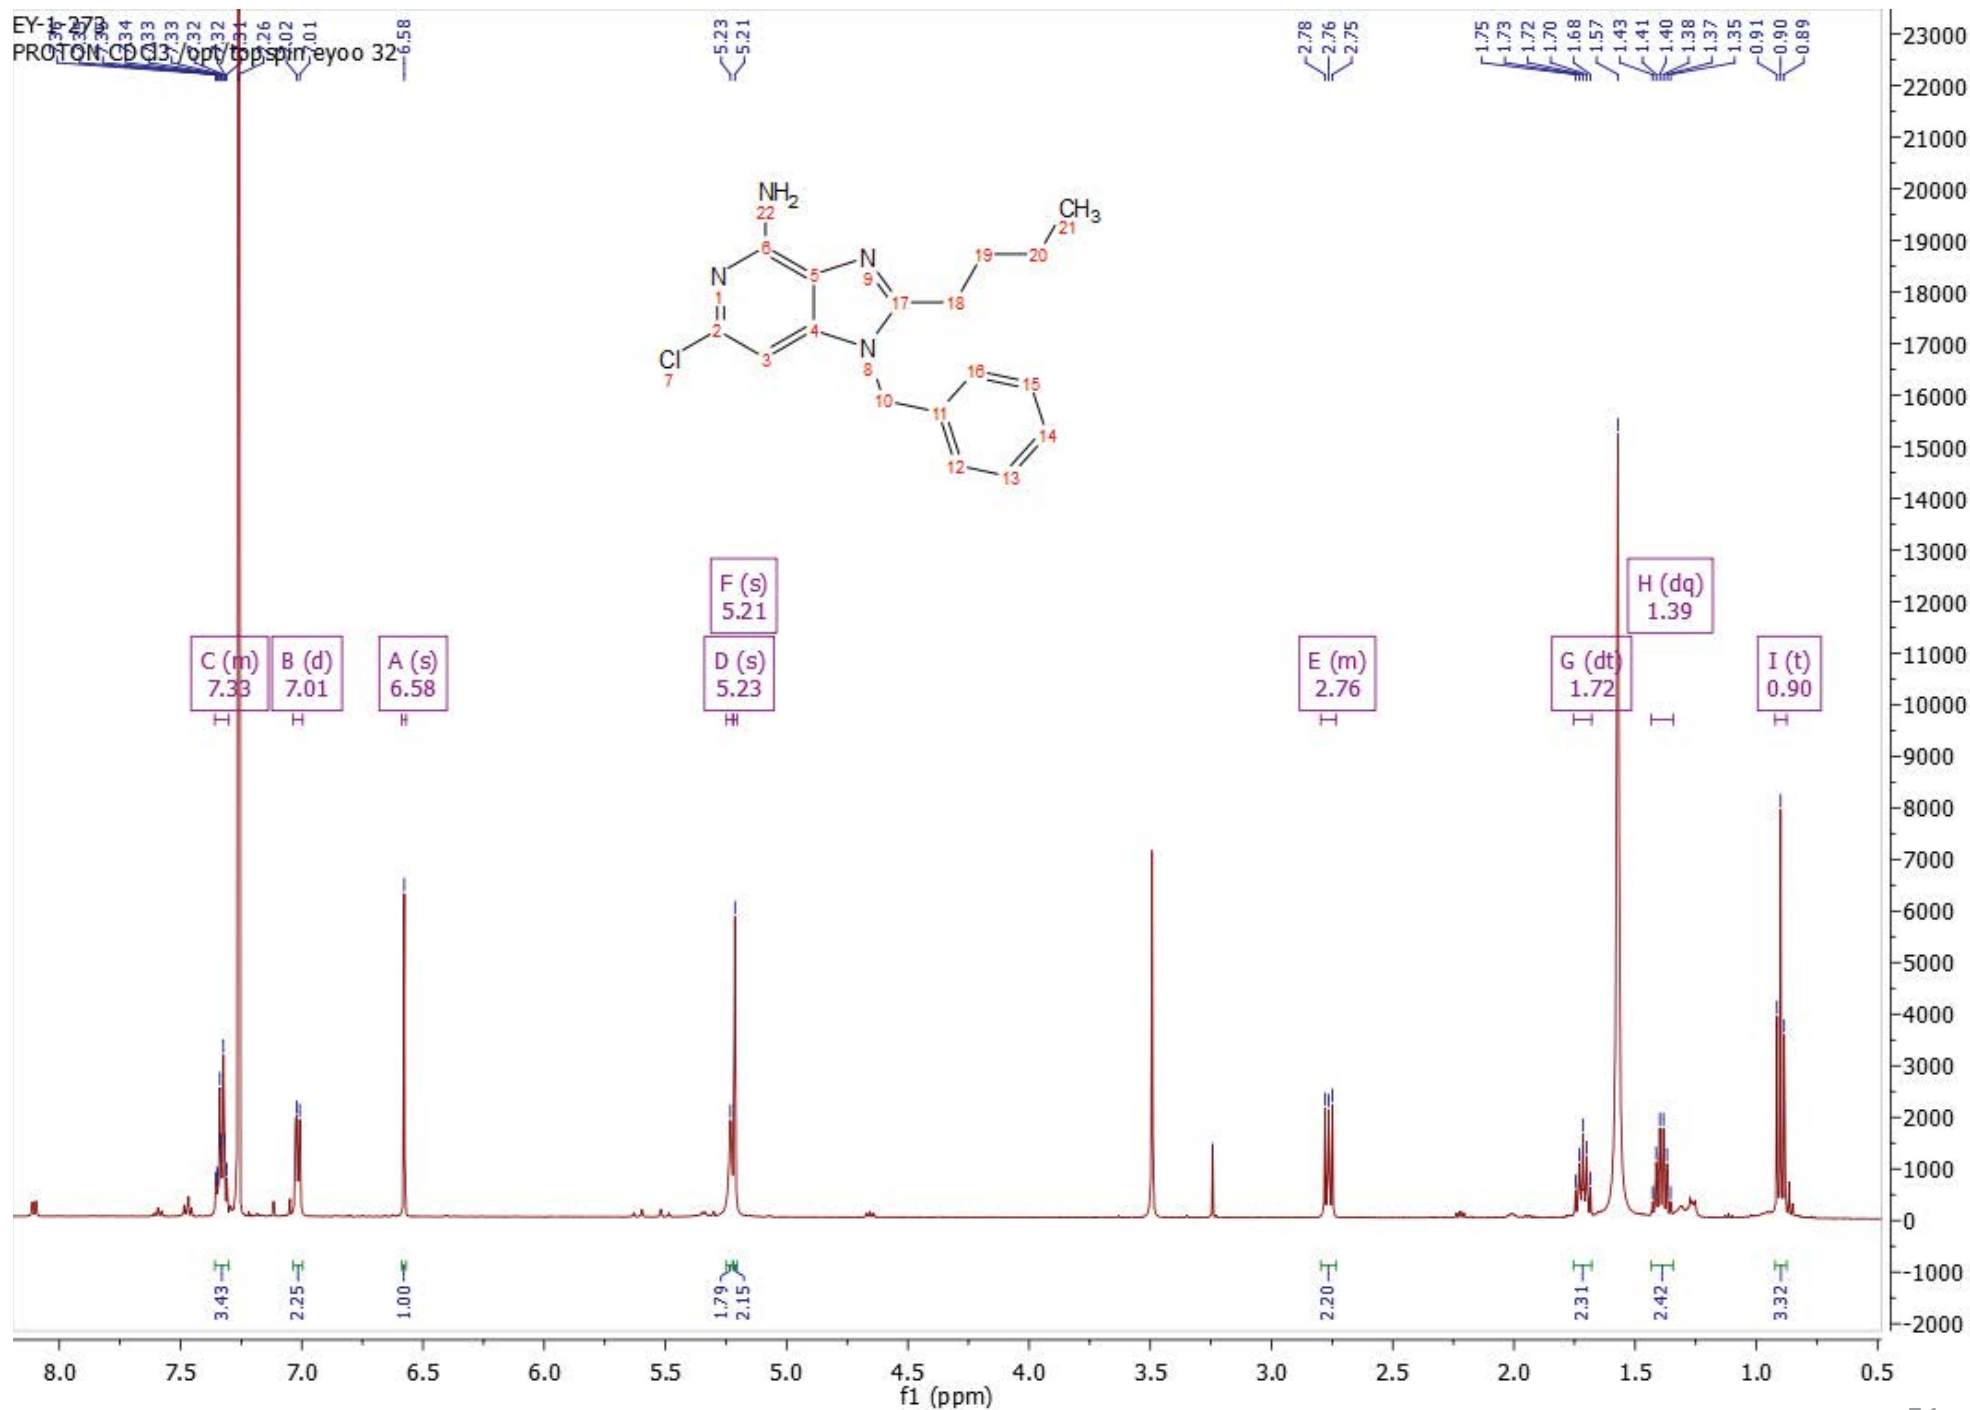

# <sup>13</sup>C NMR

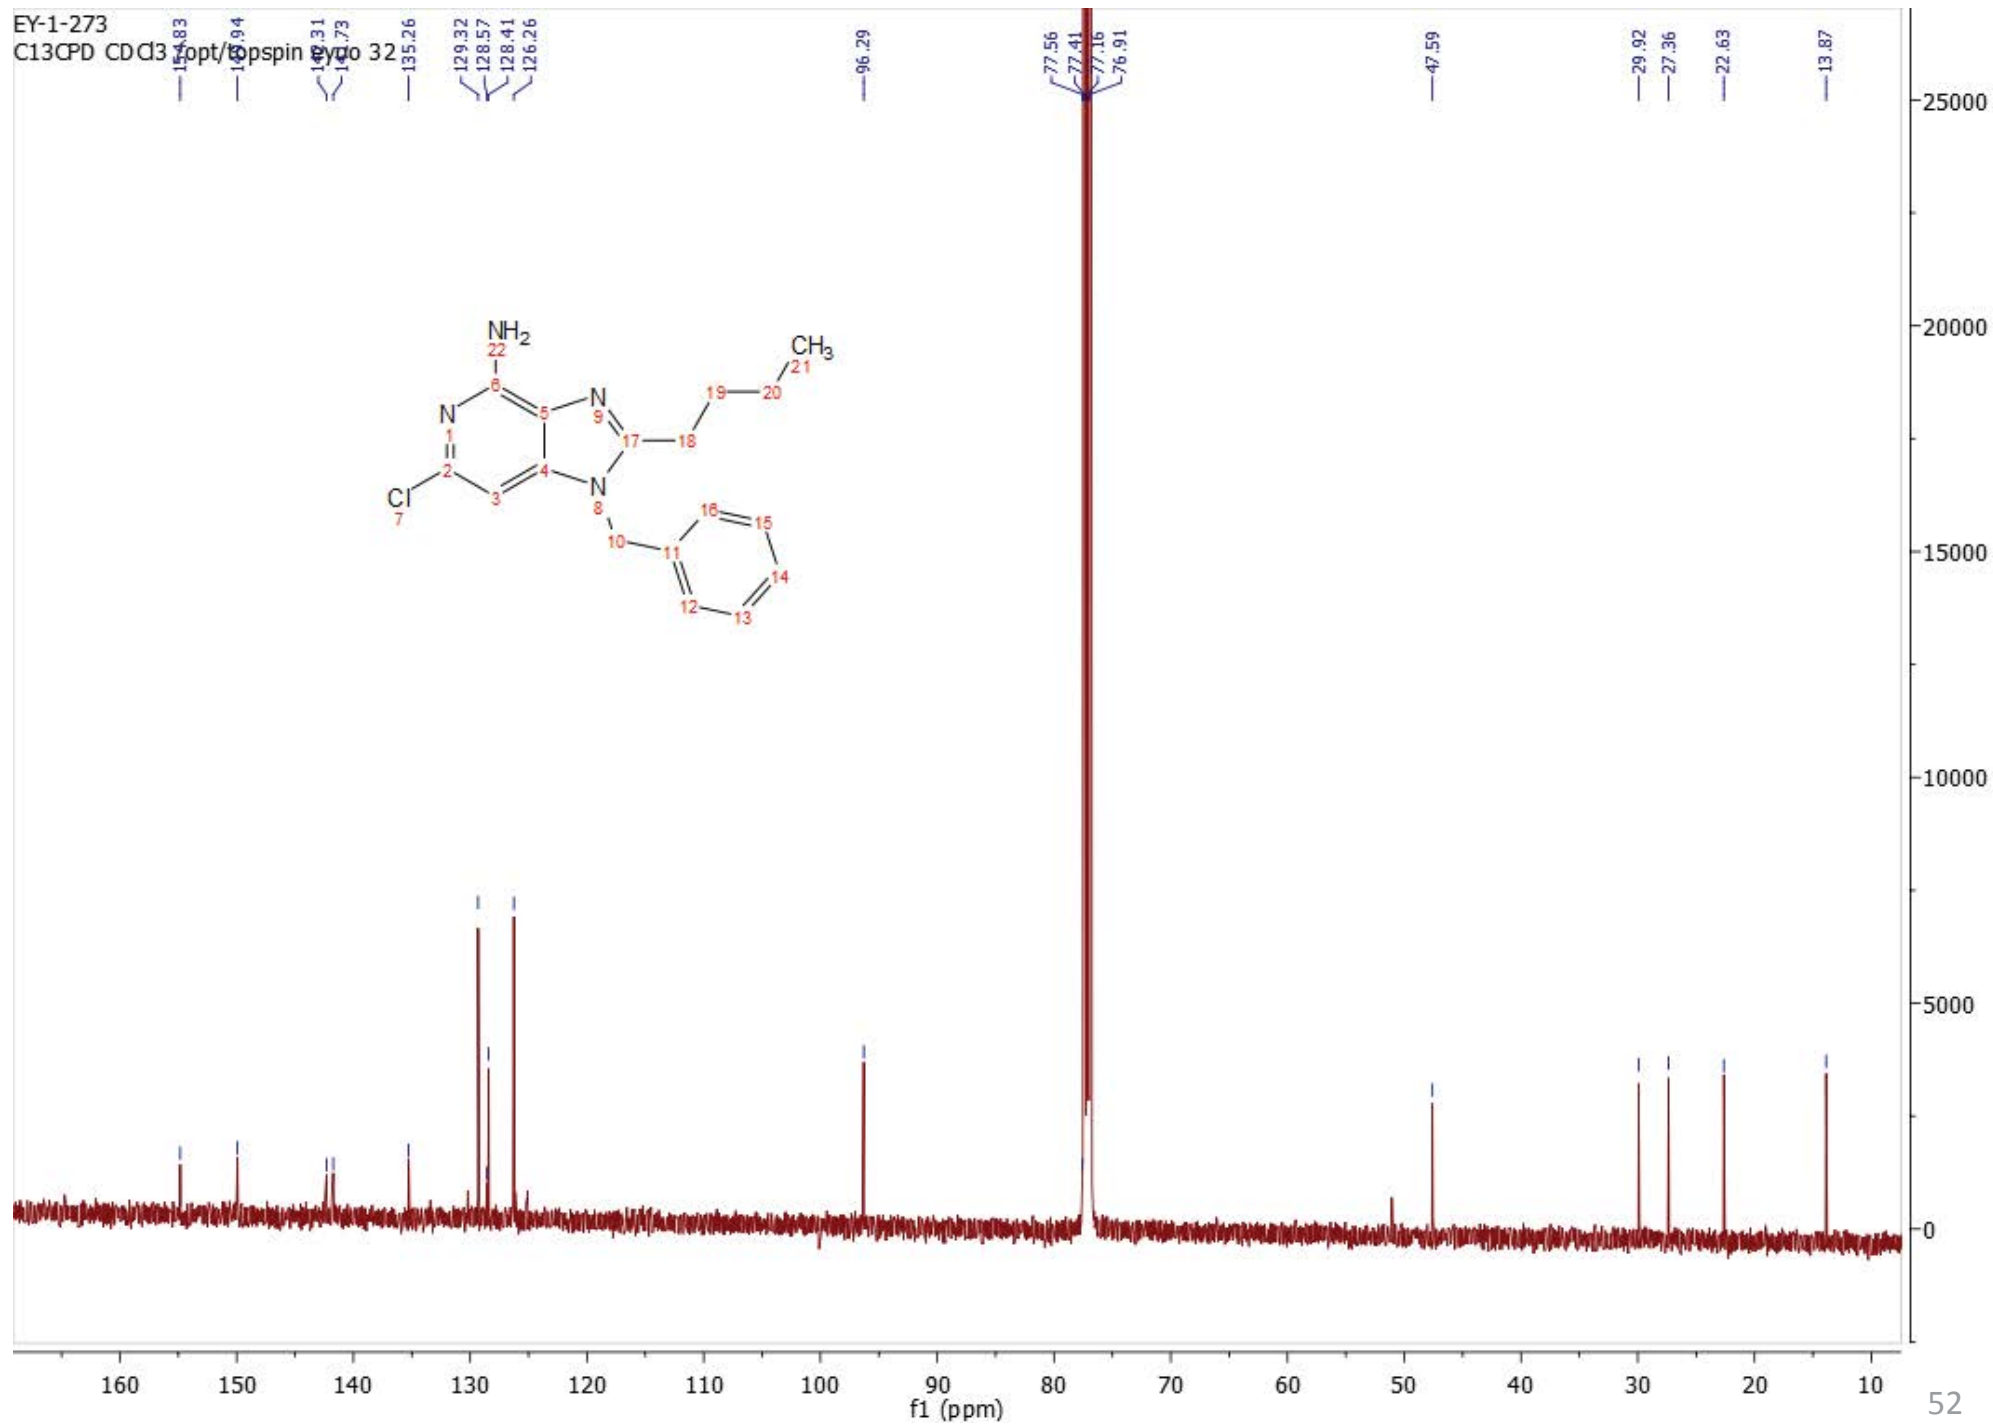

# 17 MS

|               |                      |             |                      |                 |              |                        |                      |
|---------------|----------------------|-------------|----------------------|-----------------|--------------|------------------------|----------------------|
| Sample Name   | 03.20.12 EY-1-273 tu | Position    | Vial 1               | Instrument Name | Instrument 1 | User Name              |                      |
| Inj Vol       | -1                   | InjPosition |                      | SampleType      | Sample       | IRM Calibration Status | Success              |
| Data Filename | 03.20.12 EY-1-273 tu | ACQ Method  | Water-ACN Infusion M | Comment         |              | Acquired Time          | 3/20/2012 3:44:53 PM |

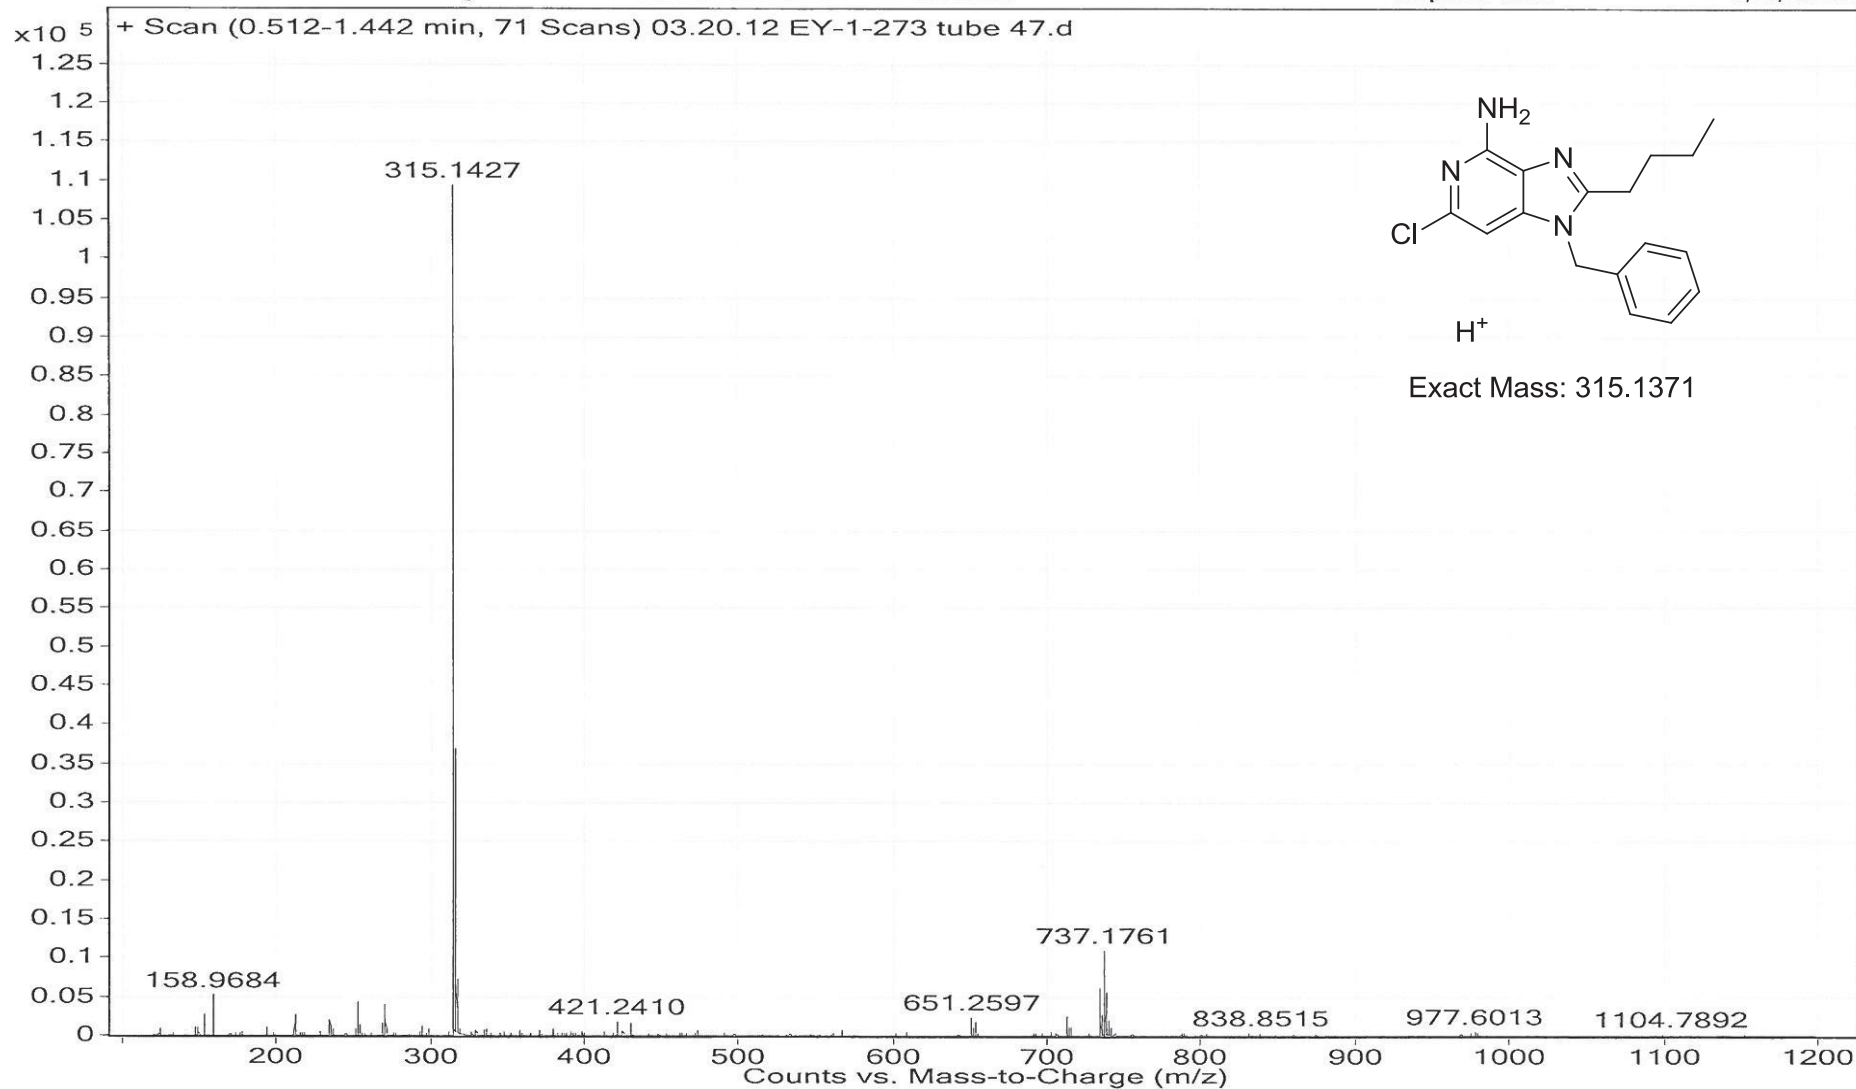

# 17 LC-MS

x10<sup>2</sup> +ESI TIC Scan Frag=175.0V 06.11.12 EY-1-273 PurityCheck.d

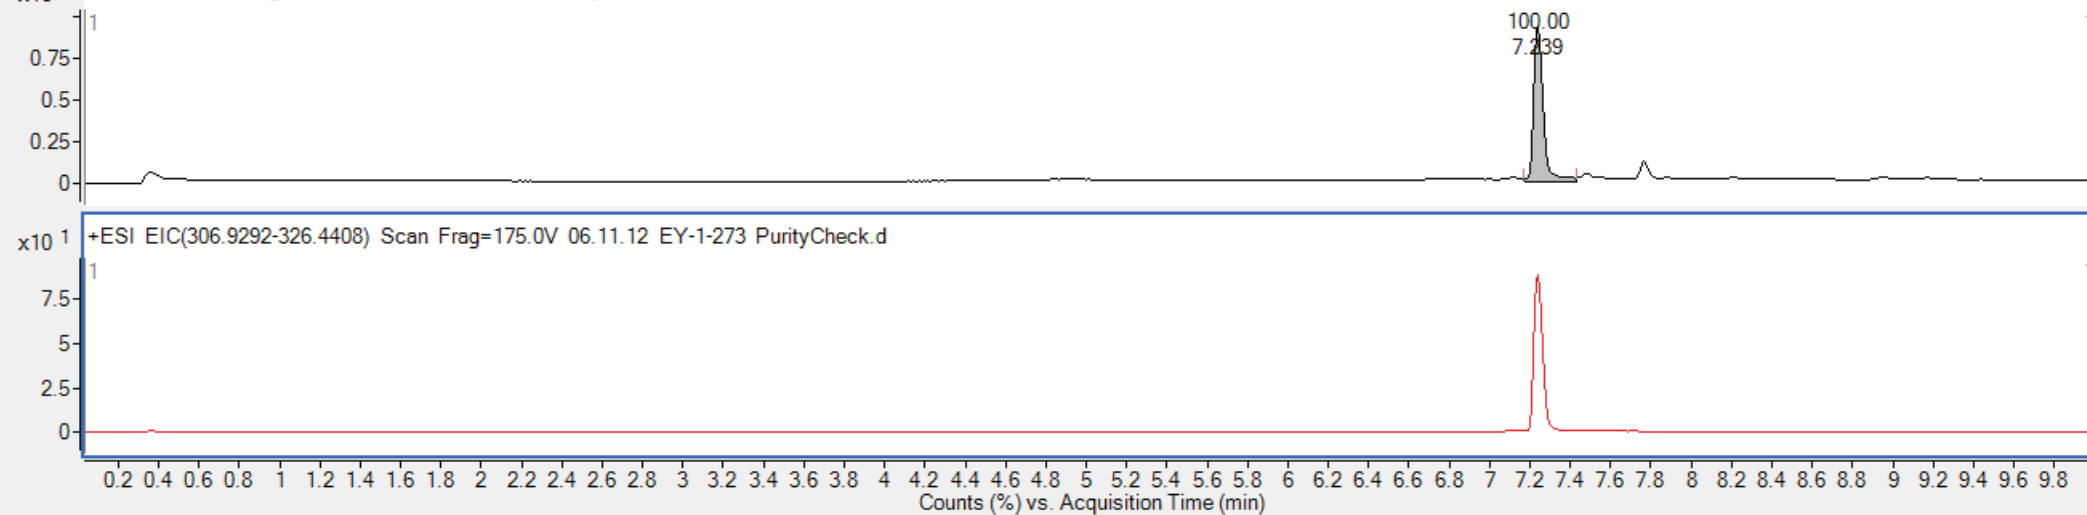

x10<sup>6</sup> +ESI Scan (7.189-7.314 min, 16 Scans) Frag=175.0V 06.11.12 EY-1-273 PurityCheck.d

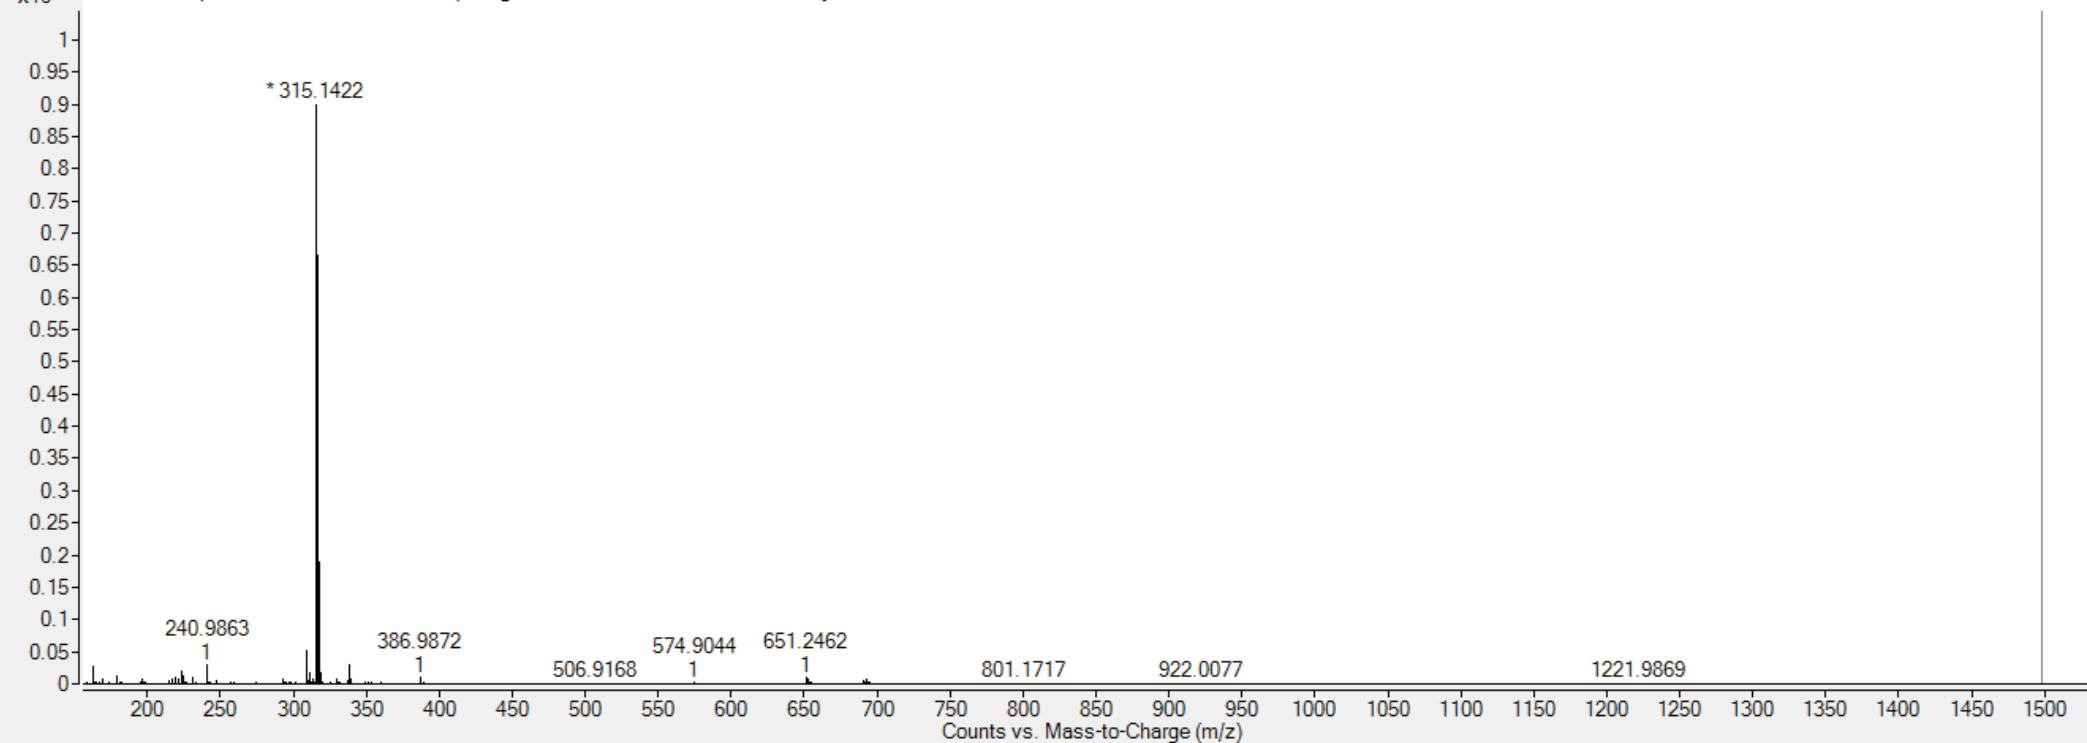

# 18a MS

|               |                      |             |                      |                 |              |                        |                      |
|---------------|----------------------|-------------|----------------------|-----------------|--------------|------------------------|----------------------|
| Sample Name   | 05.22.12 EY-2-54 tub | Position    | Vial 1               | Instrument Name | Instrument 1 | User Name              |                      |
| Inj Vol       | -1                   | InjPosition |                      | SampleType      | Sample       | IRM Calibration Status | Success              |
| Data Filename | 05.22.12 EY-2-54 tub | ACQ Method  | Water-ACN Infusion M | Comment         |              | Acquired Time          | 5/22/2012 2:49:30 PM |

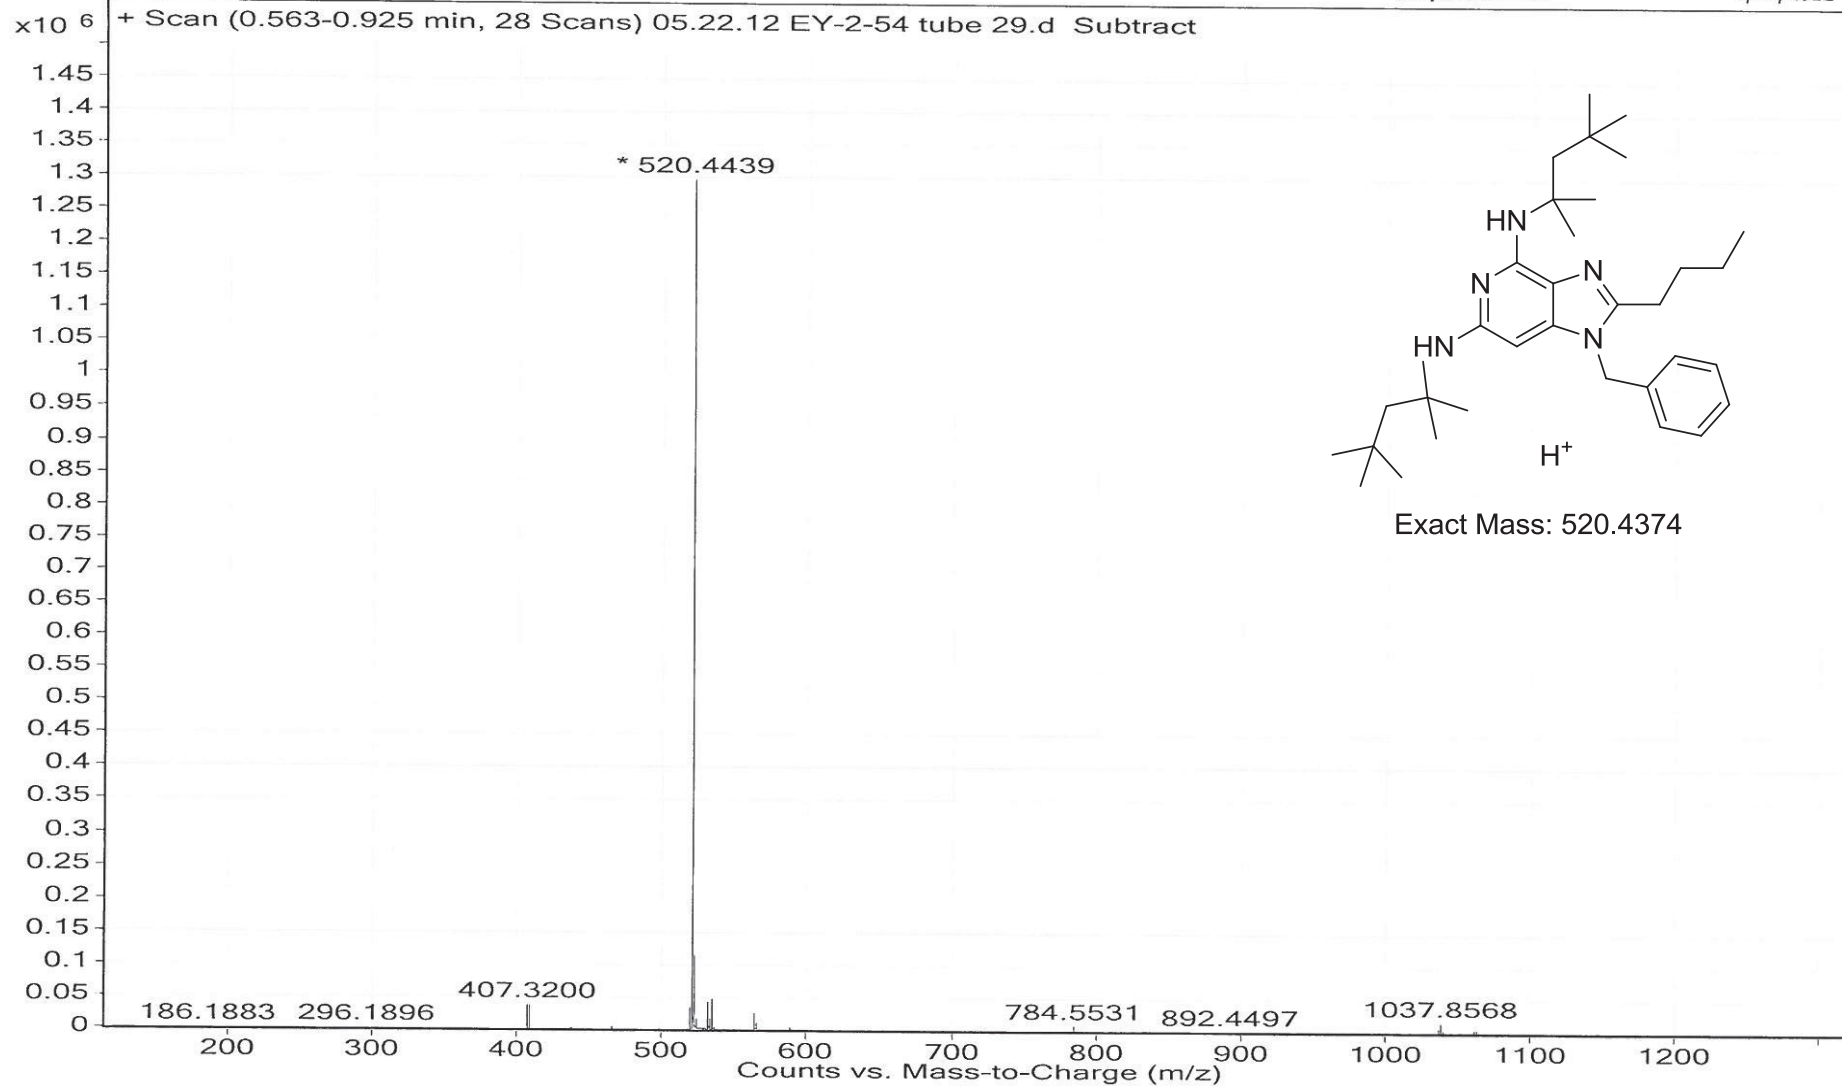

# 19a <sup>1</sup>H NMR

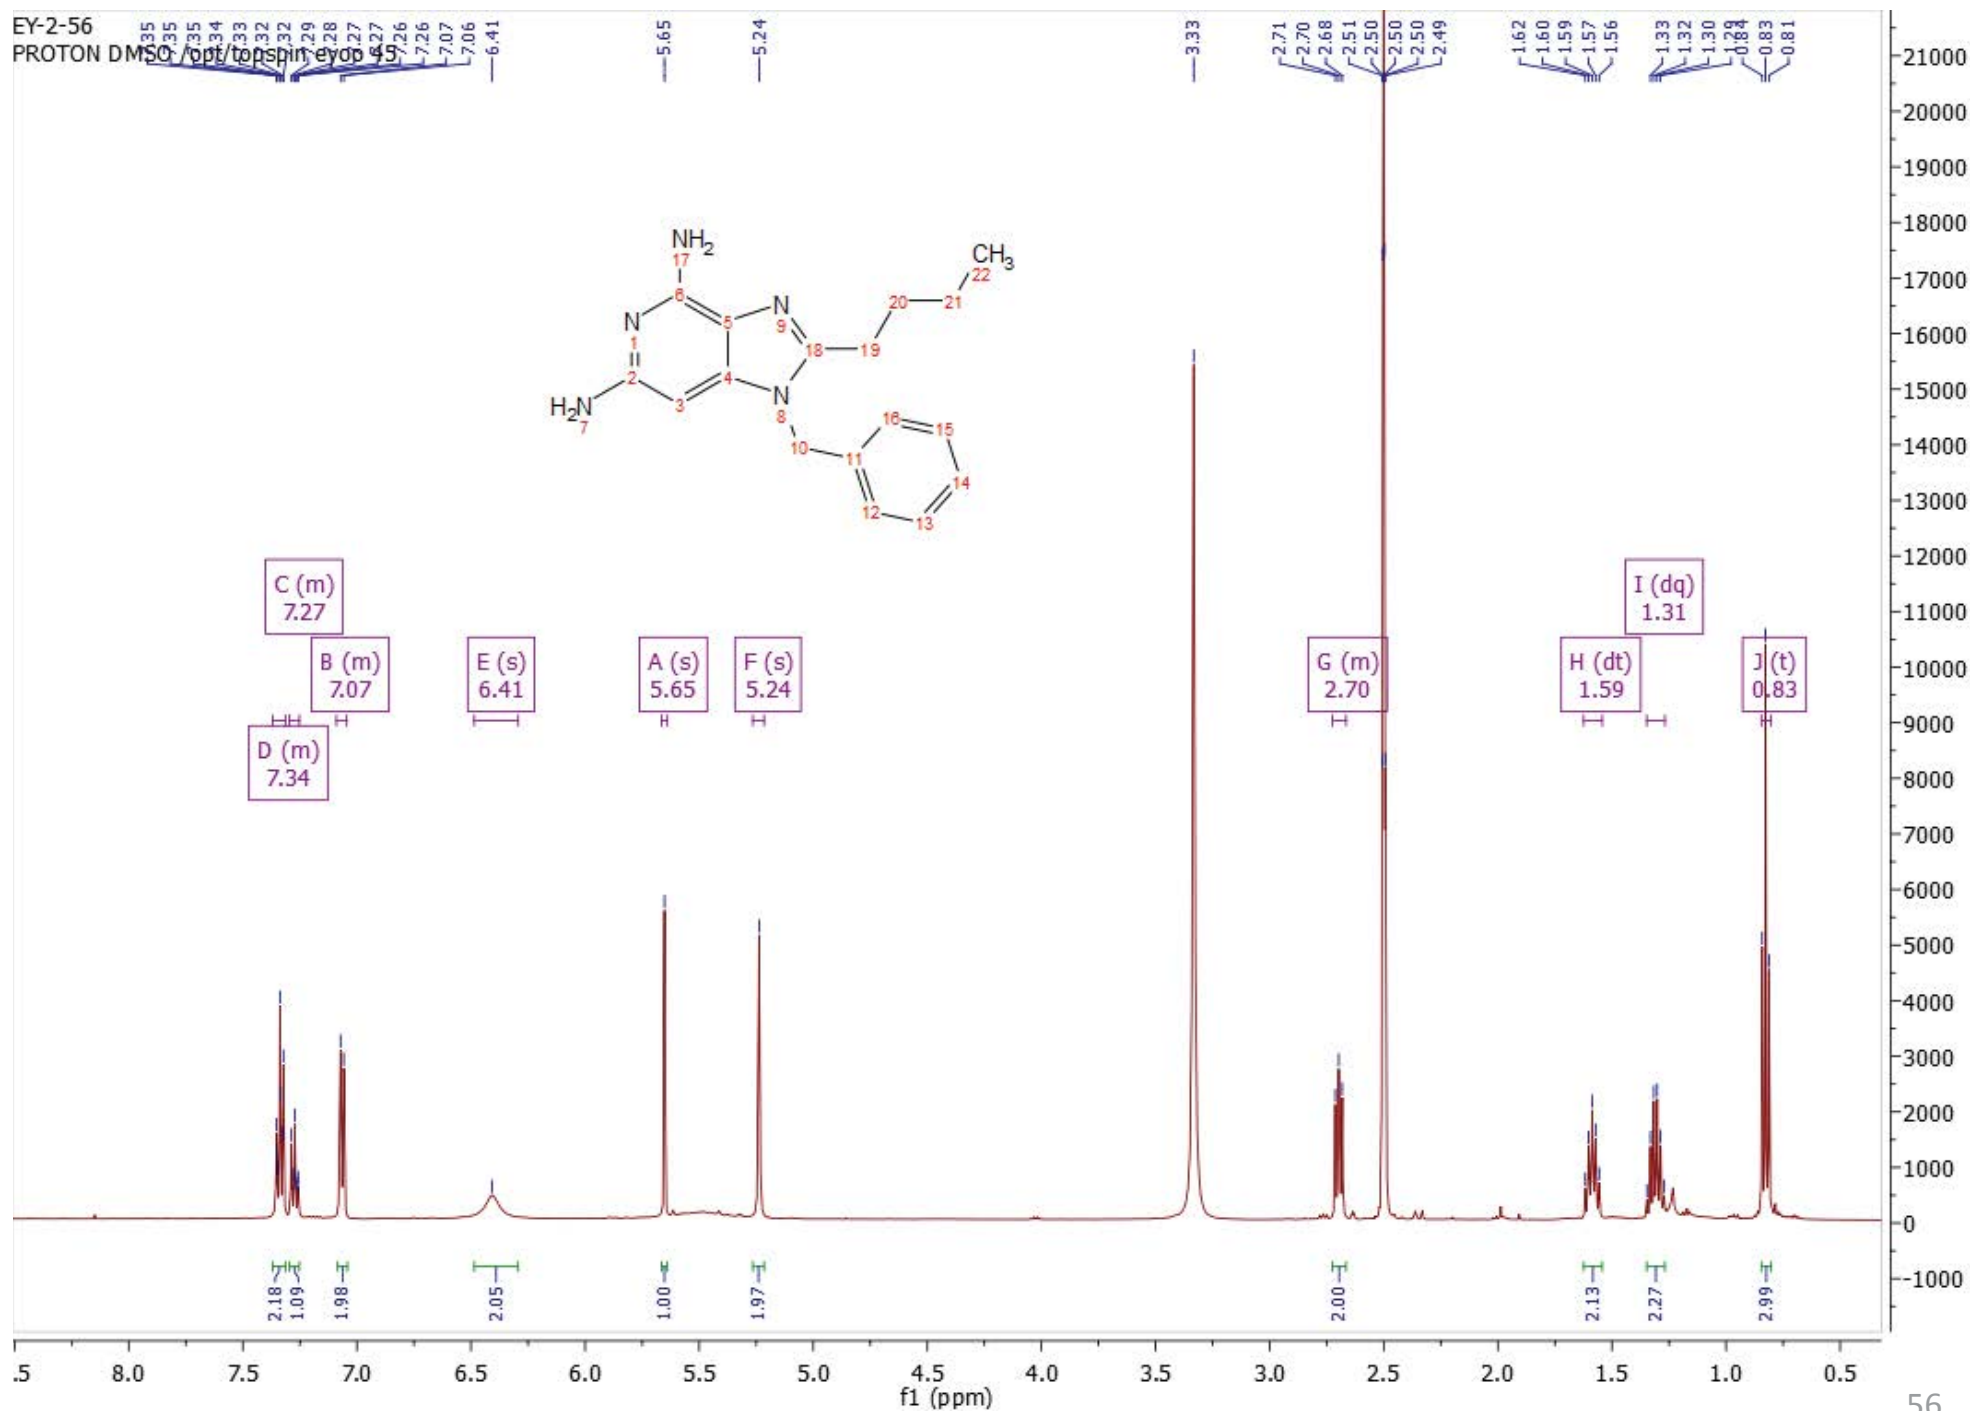

# 19a <sup>13</sup>C NMR

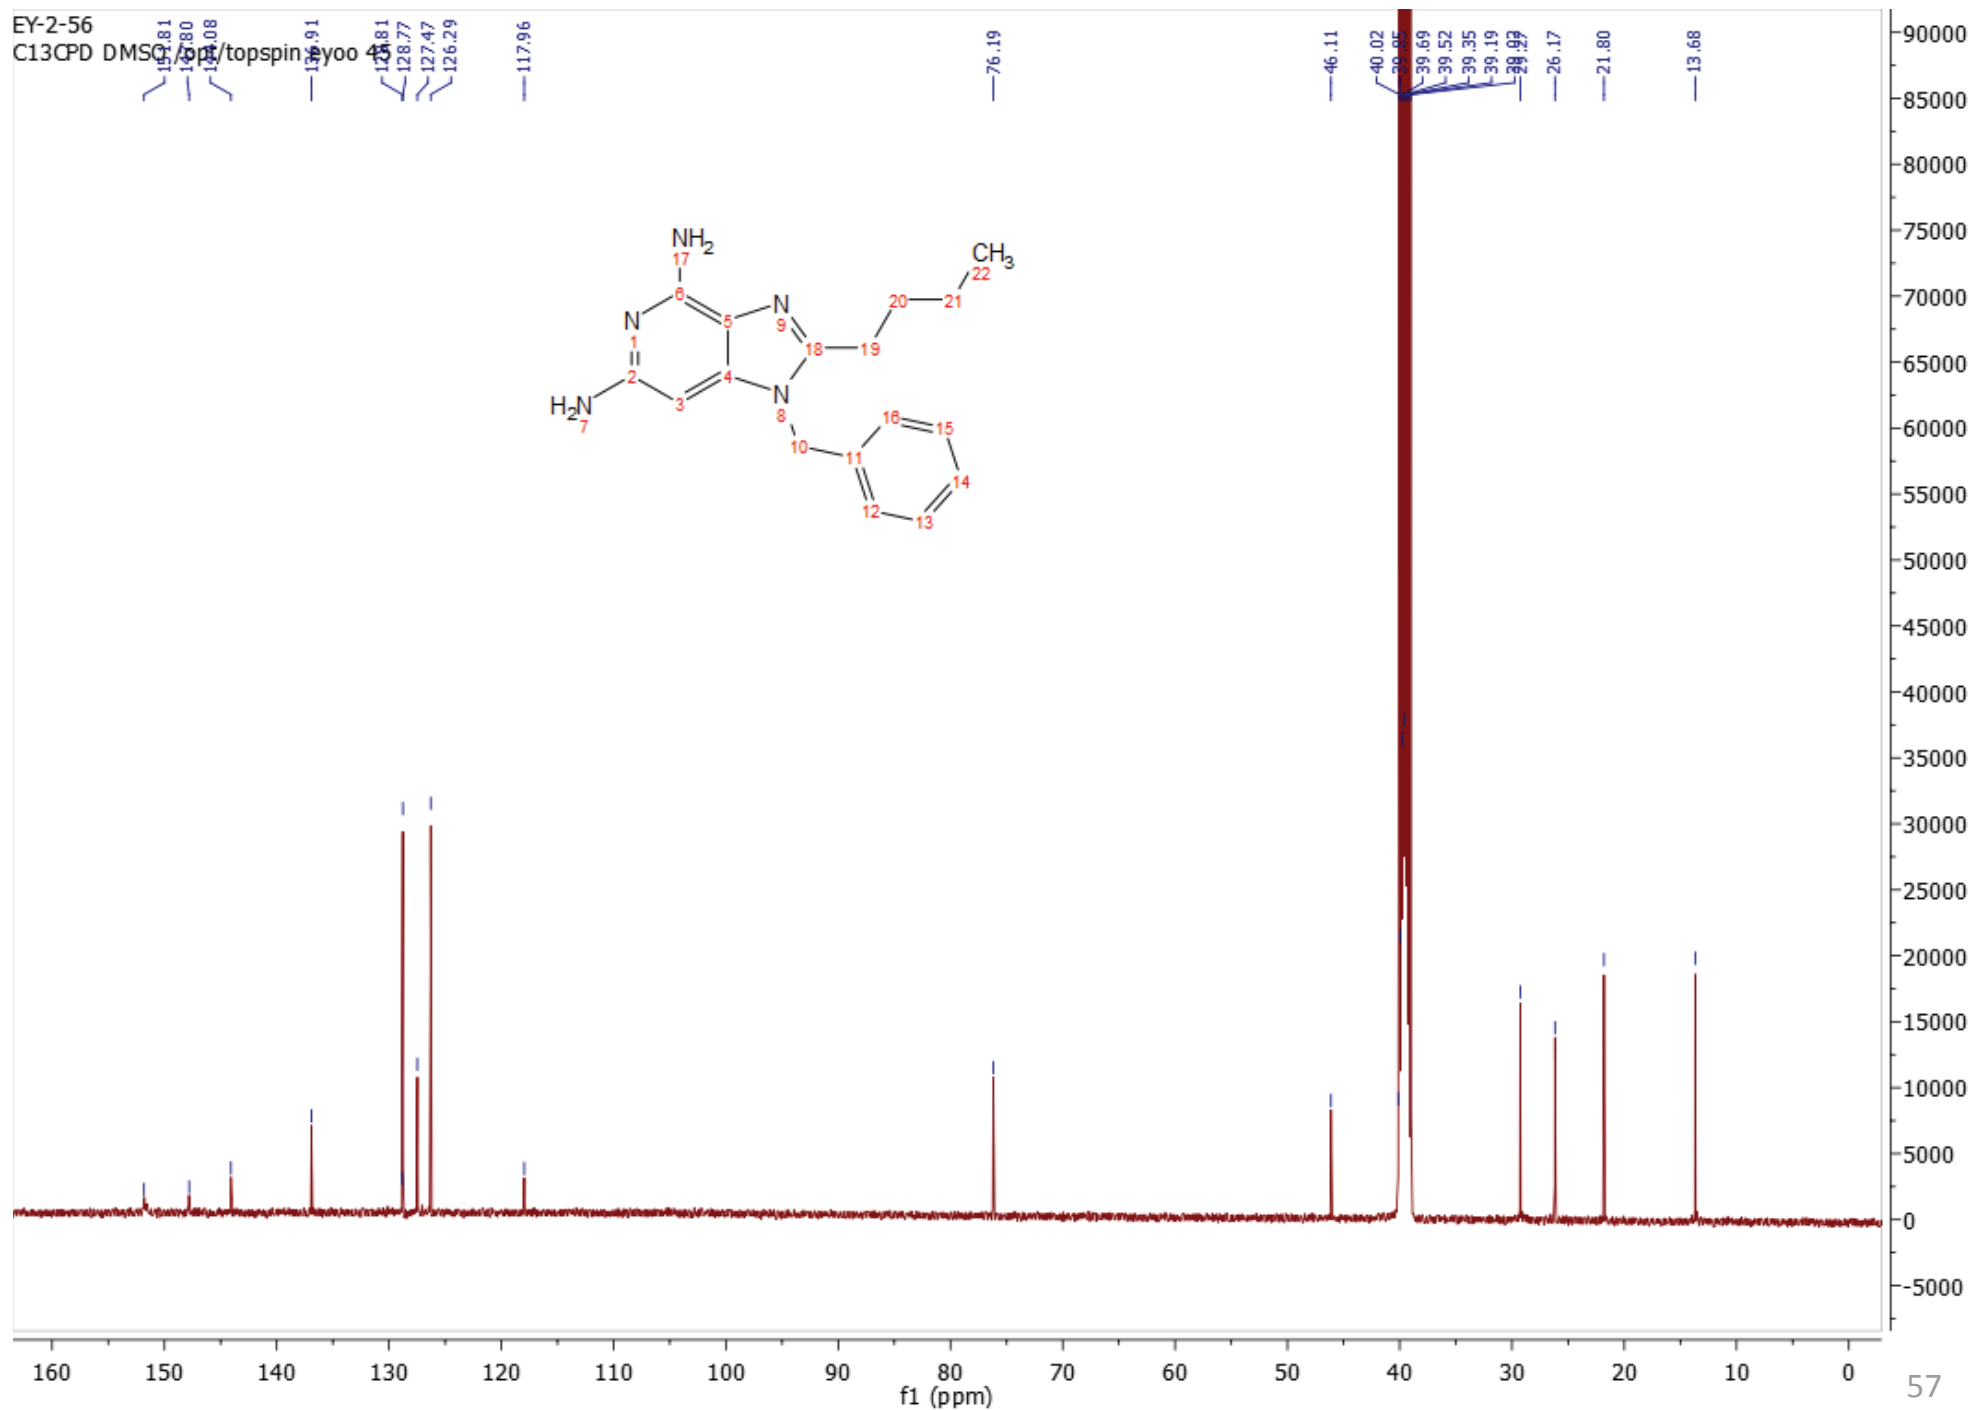



# 19a MS

|               |                    |             |                      |                 |              |                        |                      |
|---------------|--------------------|-------------|----------------------|-----------------|--------------|------------------------|----------------------|
| Sample Name   | 05.22.12 EY-2-56   | Position    | Vial 1               | Instrument Name | Instrument 1 | User Name              |                      |
| Inj Vol       | -1                 | InjPosition |                      | SampleType      | Sample       | IRM Calibration Status | Success              |
| Data Filename | 05.22.12 EY-2-56.d | ACQ Method  | Water-ACN Infusion M | Comment         |              | Acquired Time          | 5/22/2012 5:53:51 PM |

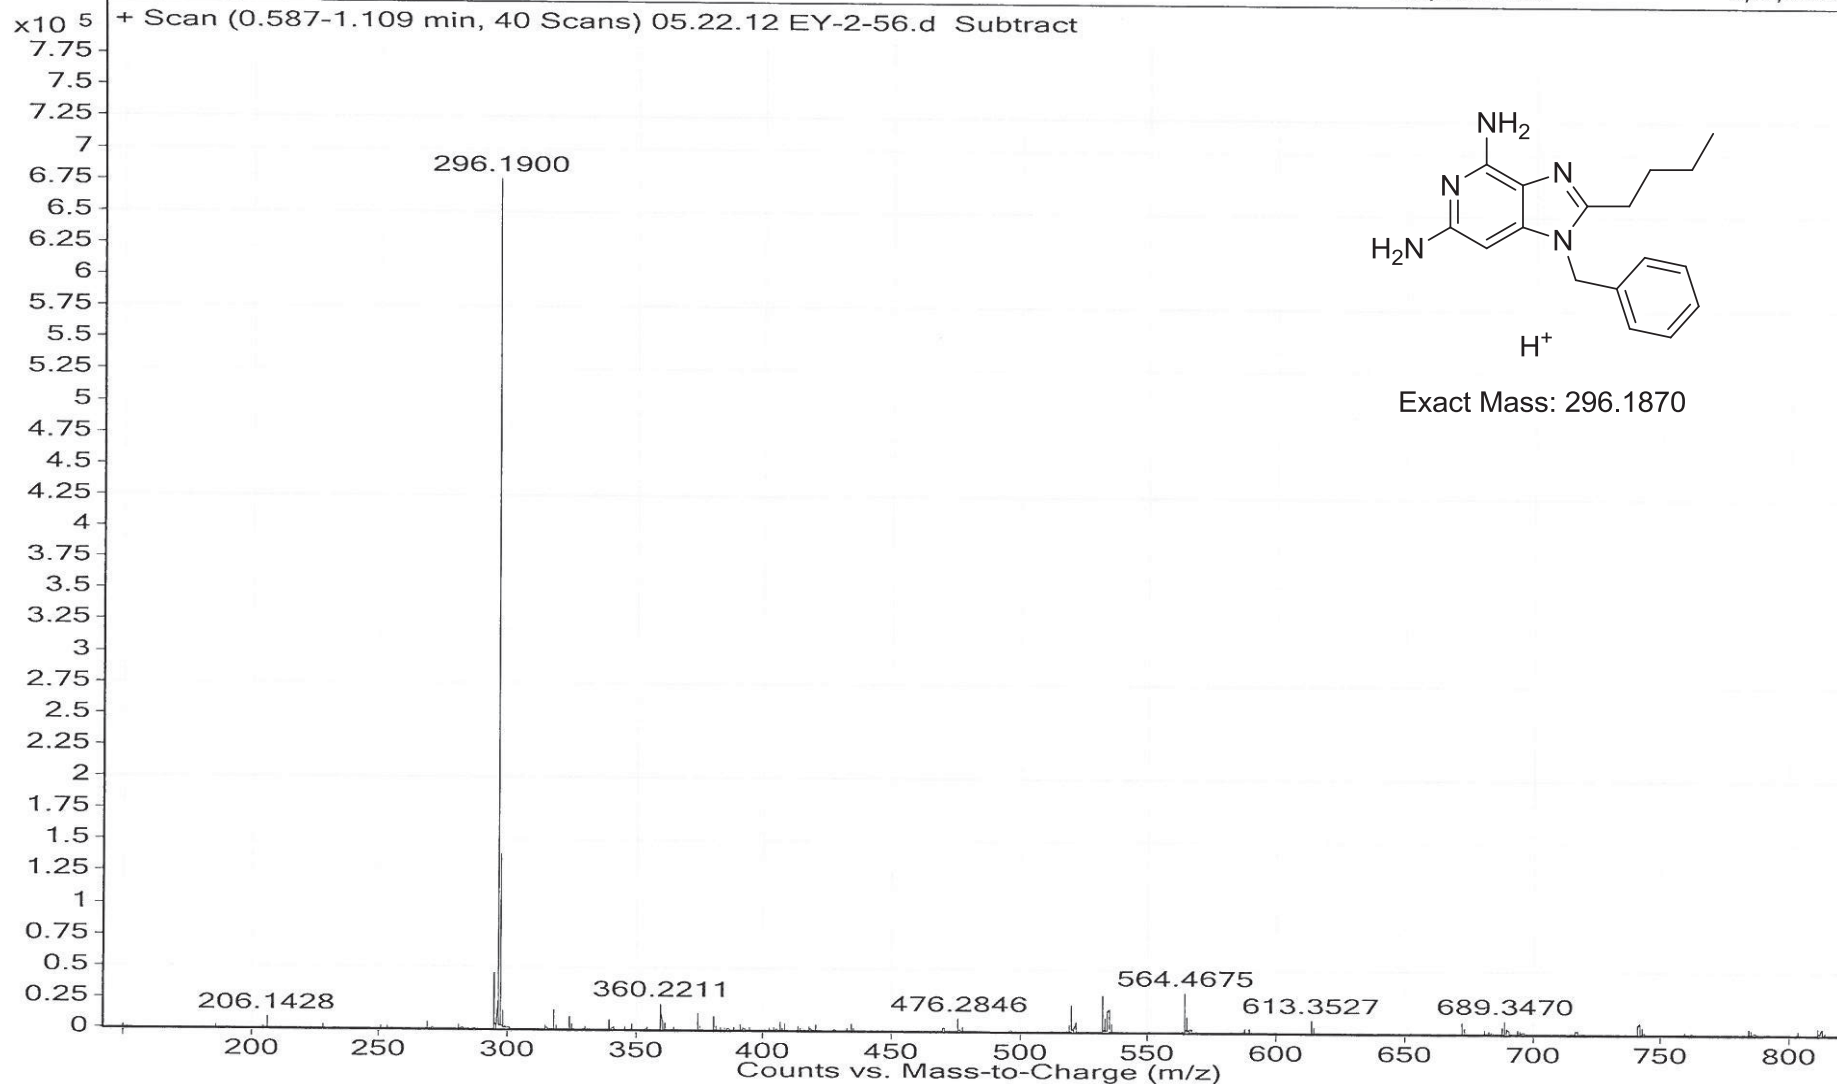

# 19a LC-MS

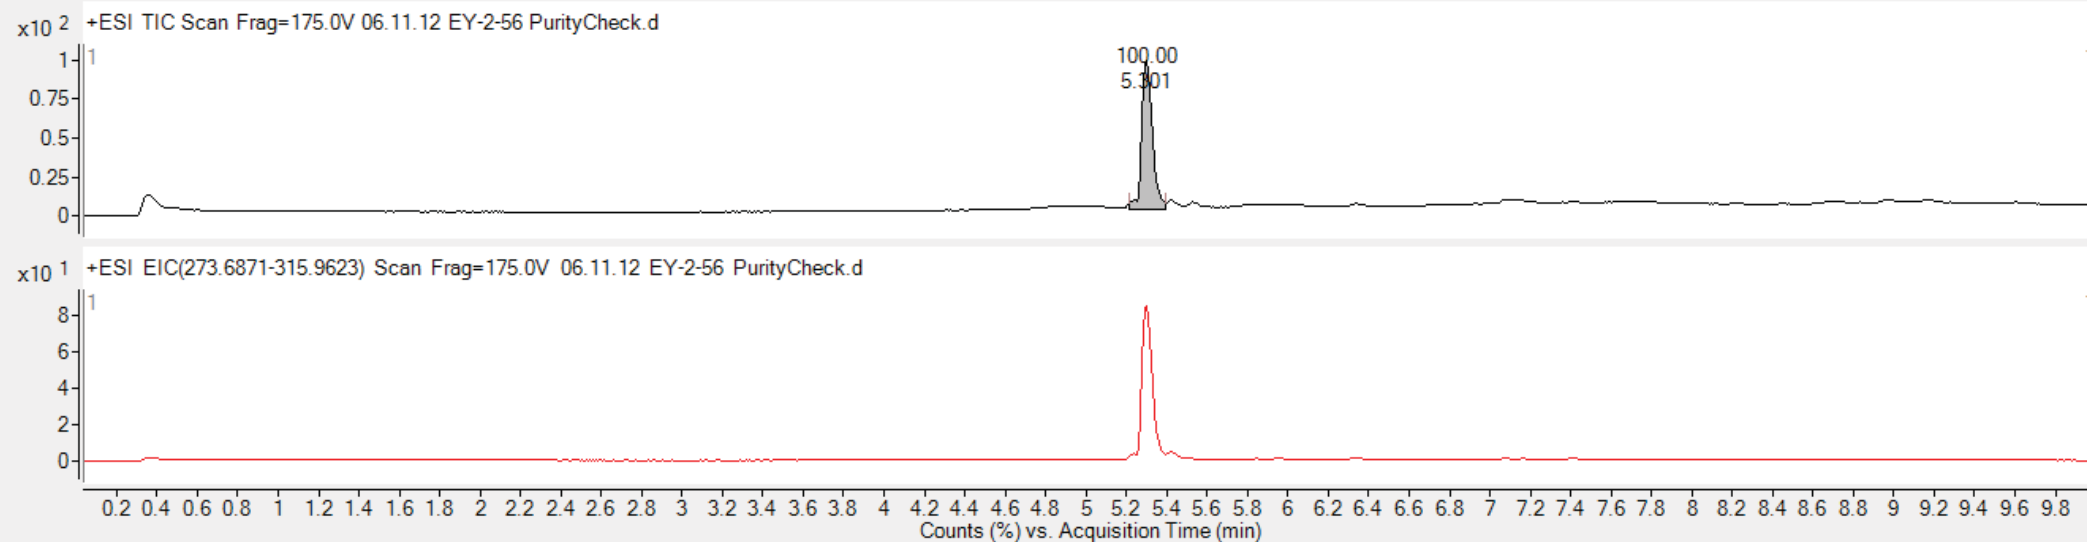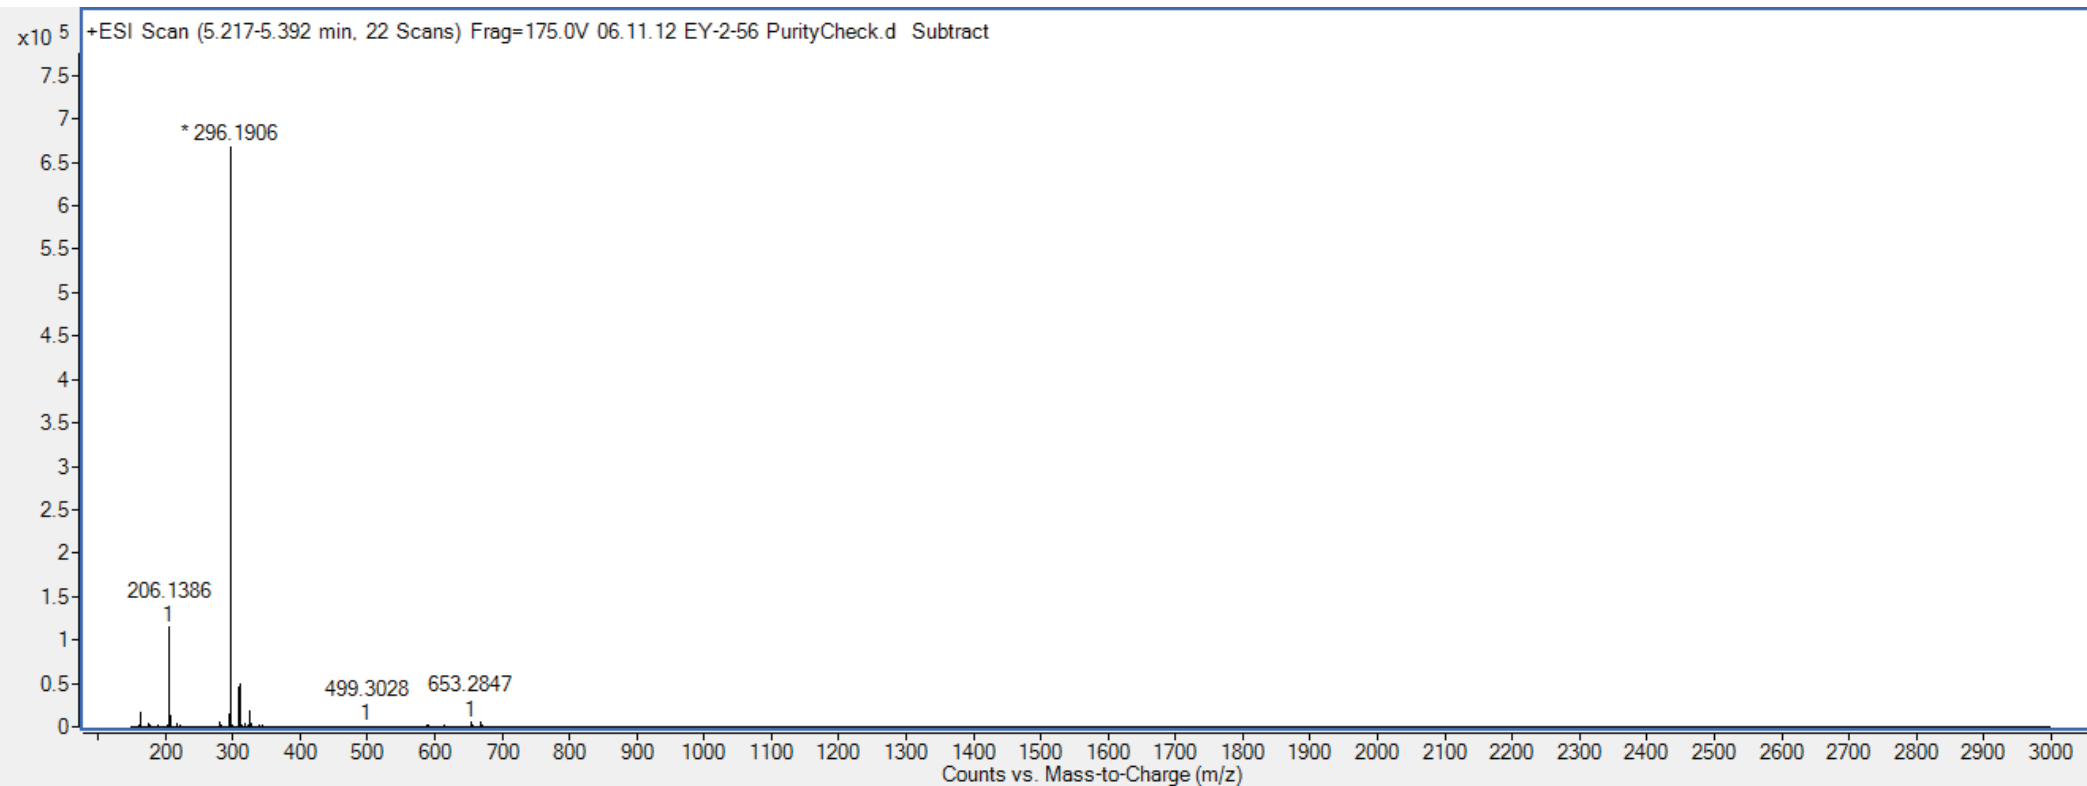

# 18b MS

|               |                    |             |                      |                 |              |                        |                     |
|---------------|--------------------|-------------|----------------------|-----------------|--------------|------------------------|---------------------|
| Sample Name   | 07.03.12 EY-2-89   | Position    | Vial 1               | Instrument Name | Instrument 1 | User Name              |                     |
| Inj Vol       | -1                 | InjPosition |                      | SampleType      | Sample       | IRM Calibration Status | Success             |
| Data Filename | 07.03.12 EY-2-89.d | ACQ Method  | Water-ACN Infusion M | Comment         |              | Acquired Time          | 7/3/2012 1:55:46 PM |

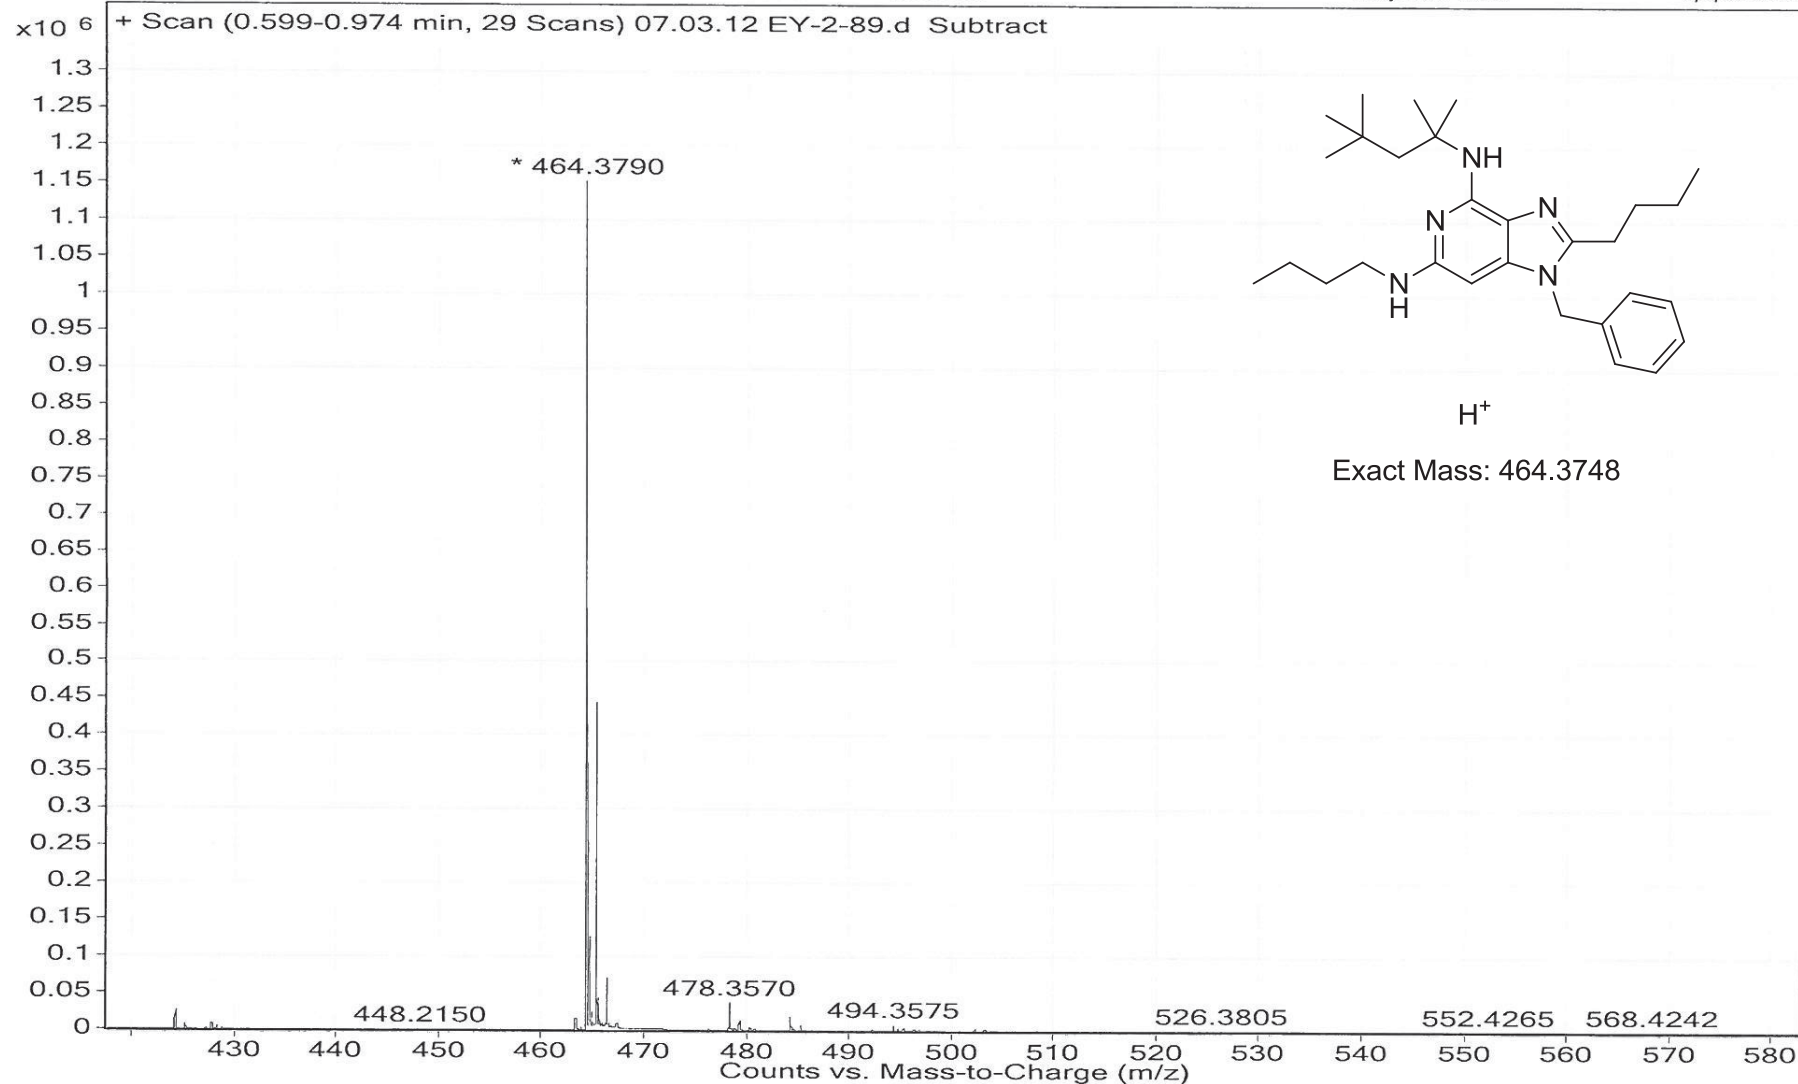

# 19b <sup>1</sup>H NMR

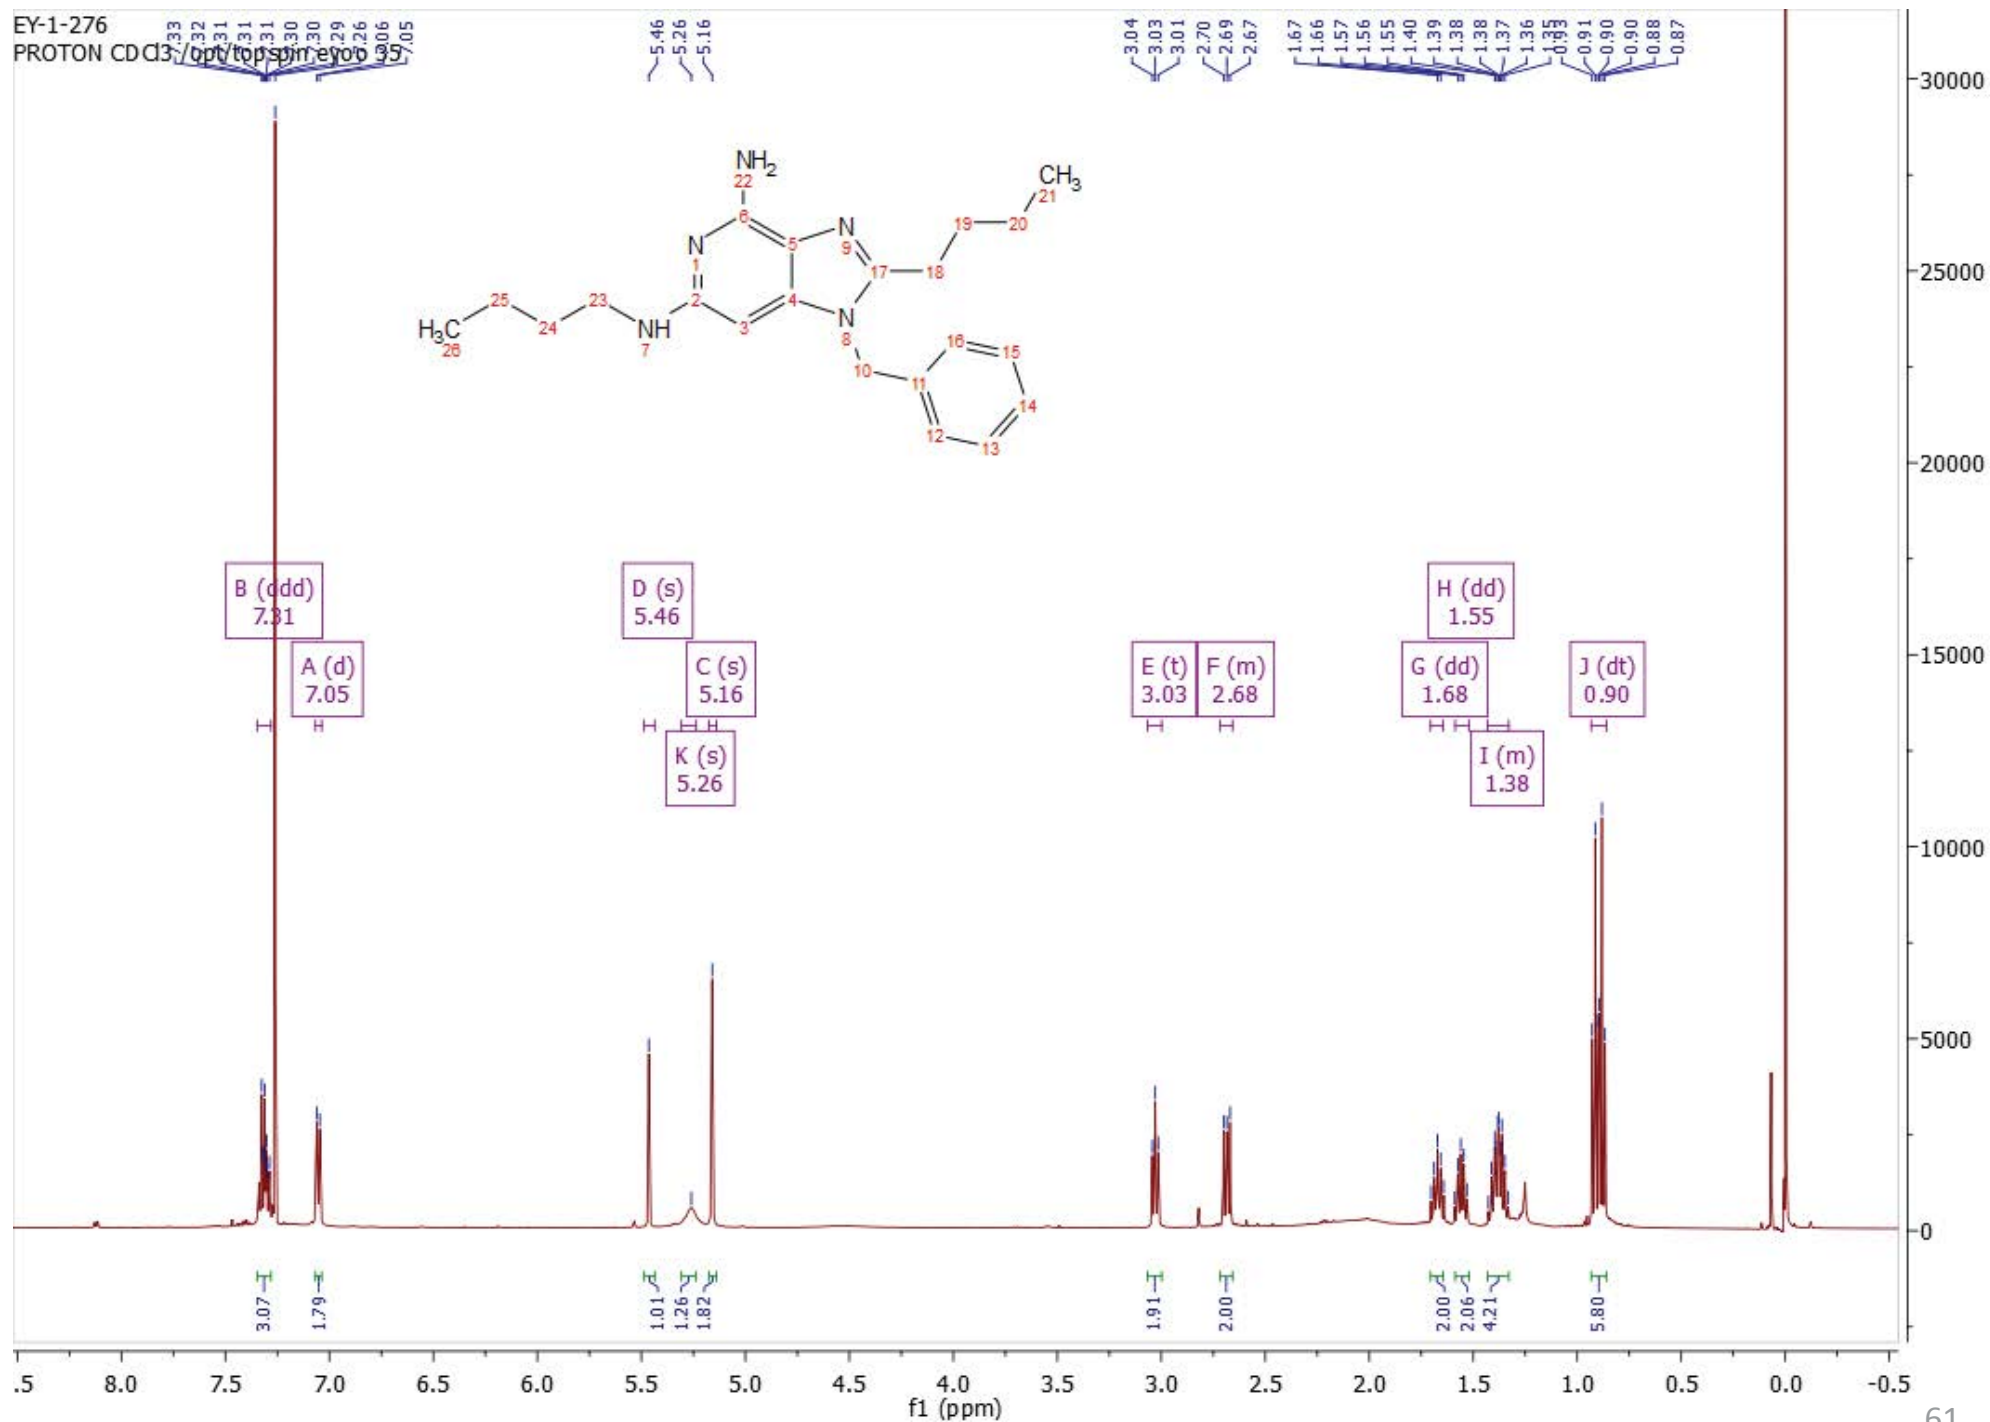

# 19b <sup>13</sup>C NMR

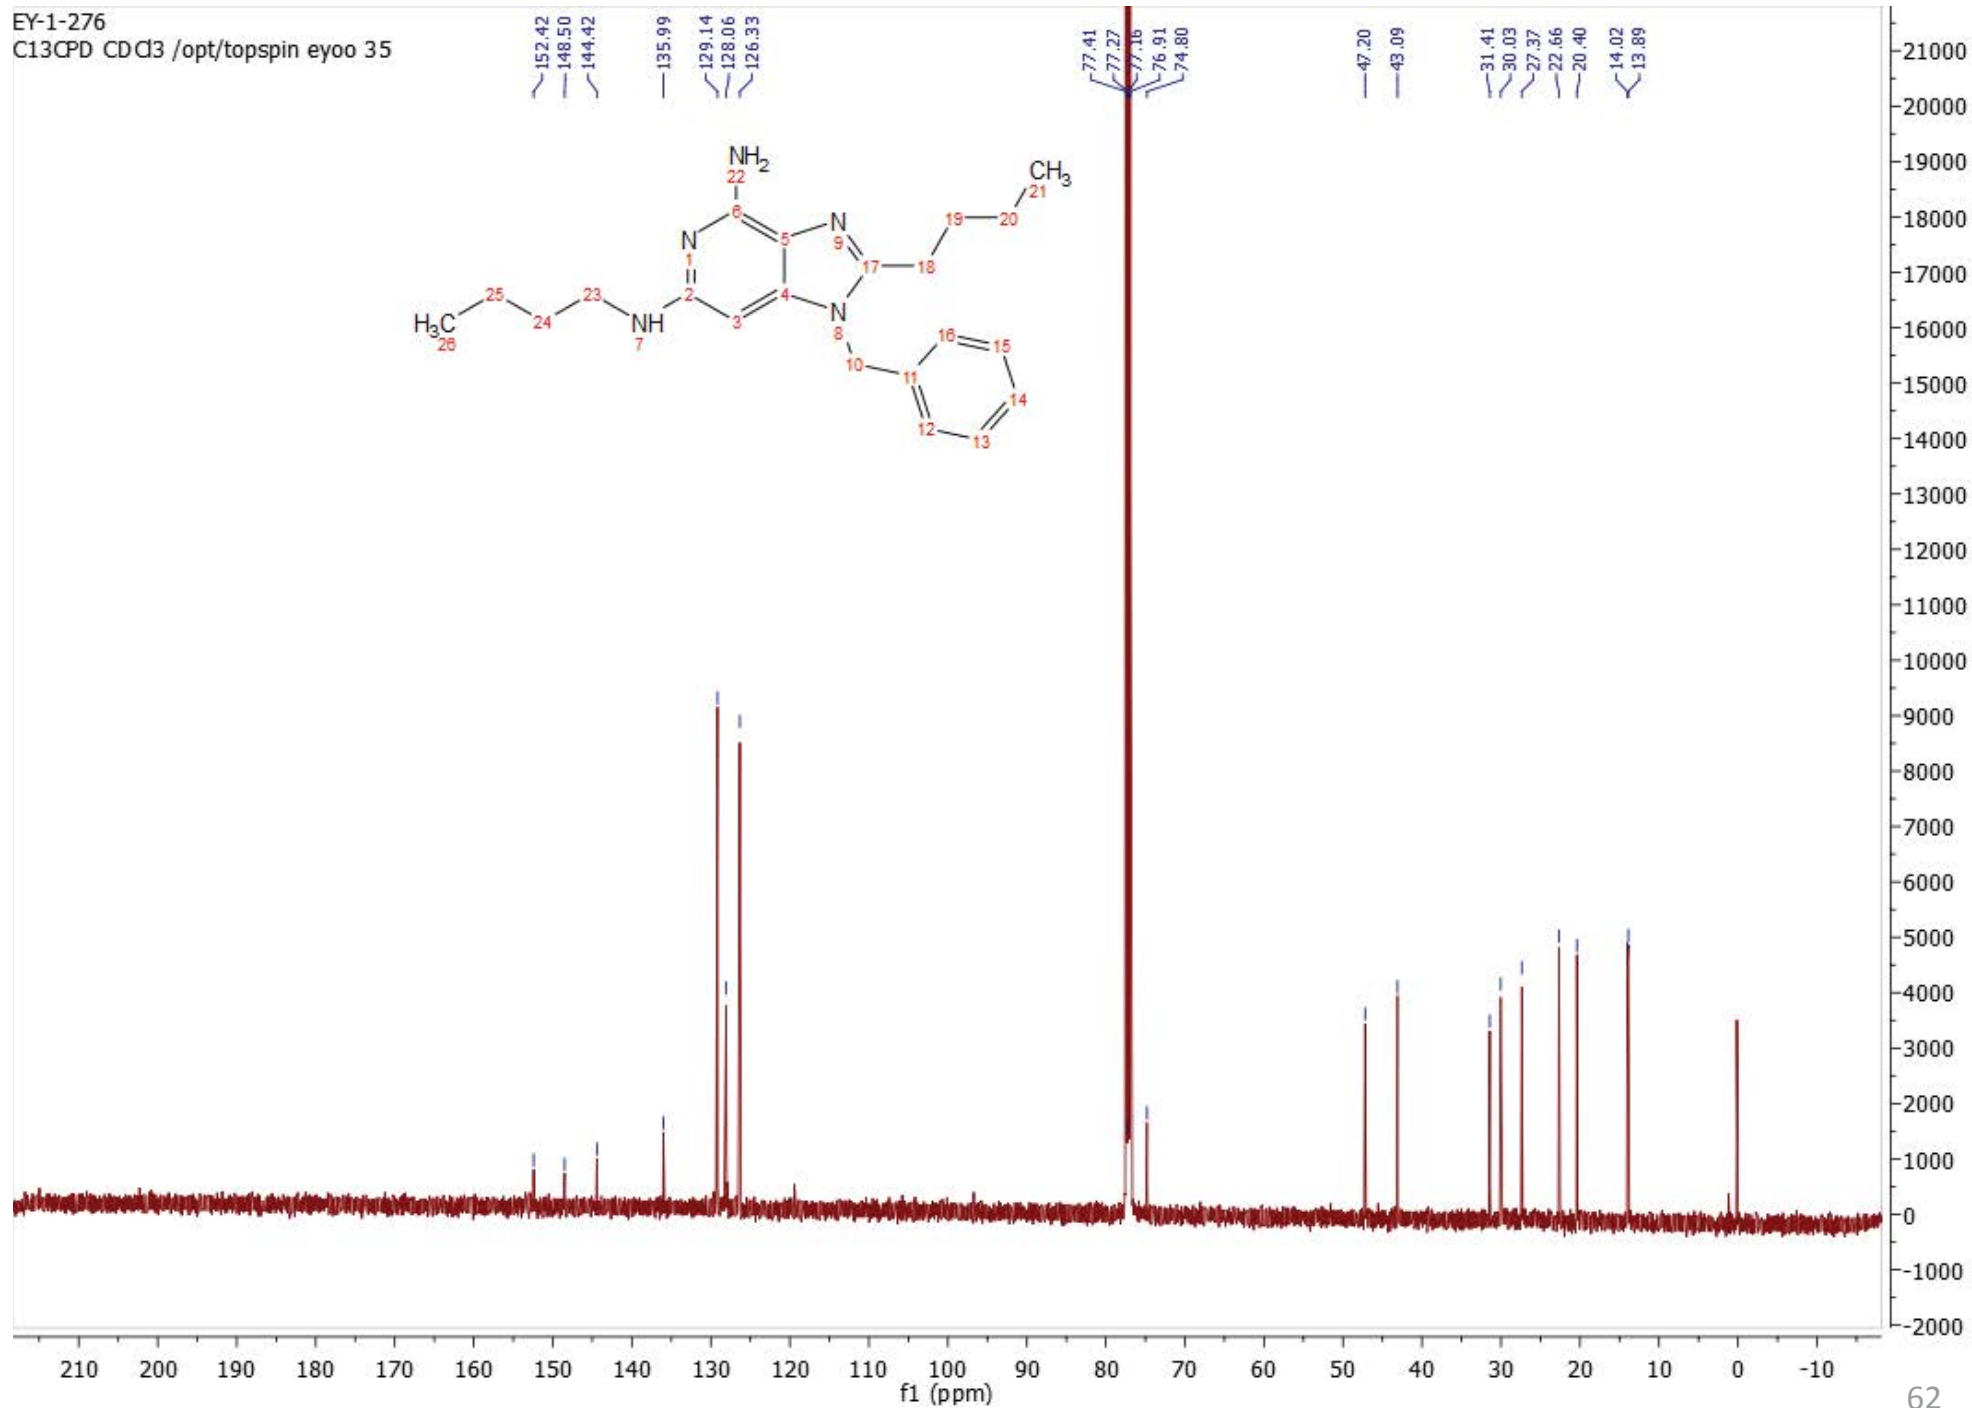

# 19b MS

|               |                      |             |                      |                 |              |                        |                      |
|---------------|----------------------|-------------|----------------------|-----------------|--------------|------------------------|----------------------|
| Sample Name   | 03.26.12 EY-1-276 tu | Position    | Vial 2               | Instrument Name | Instrument 1 | User Name              |                      |
| Inj Vol       | -1                   | InjPosition |                      | SampleType      | Sample       | IRM Calibration Status | Success              |
| Data Filename | 03.26.12 EY-1-276 tu | ACQ Method  | Water-ACN Infusion M | Comment         |              | Acquired Time          | 3/26/2012 4:59:27 PM |

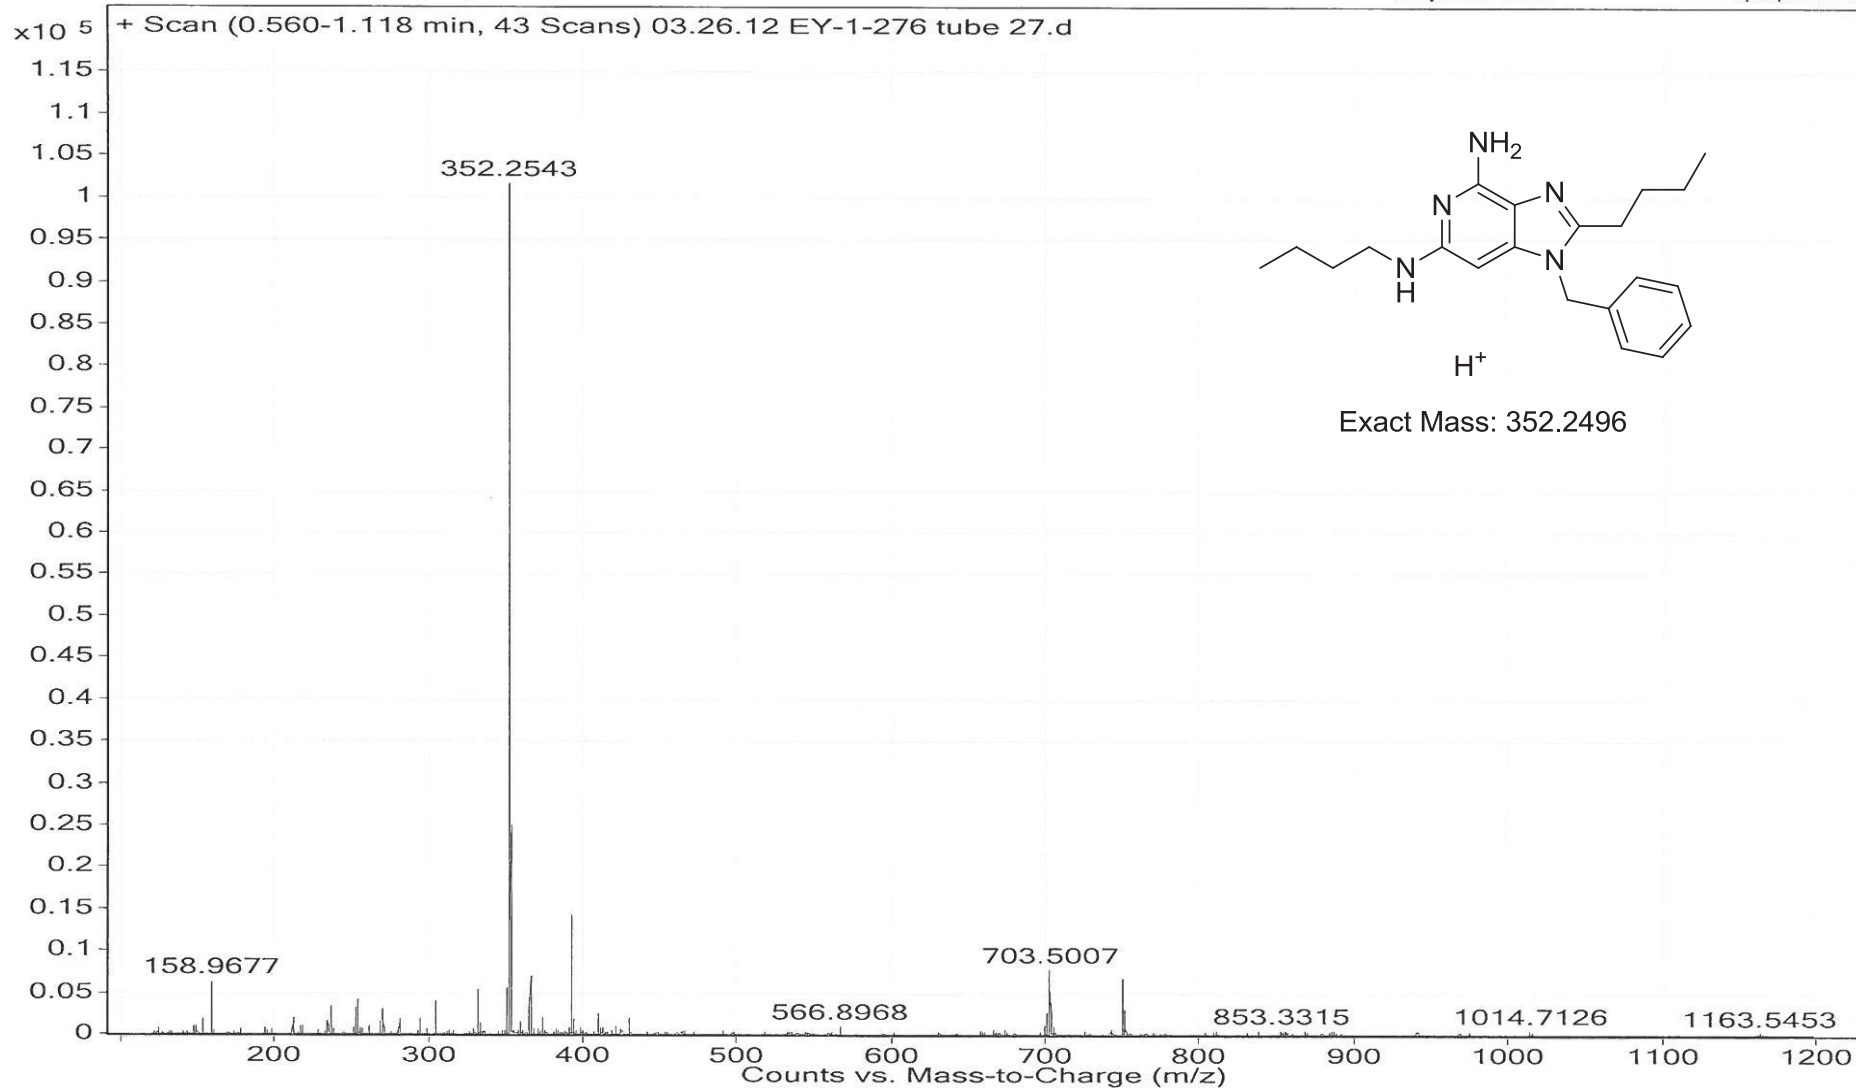

# 19b LC-MS

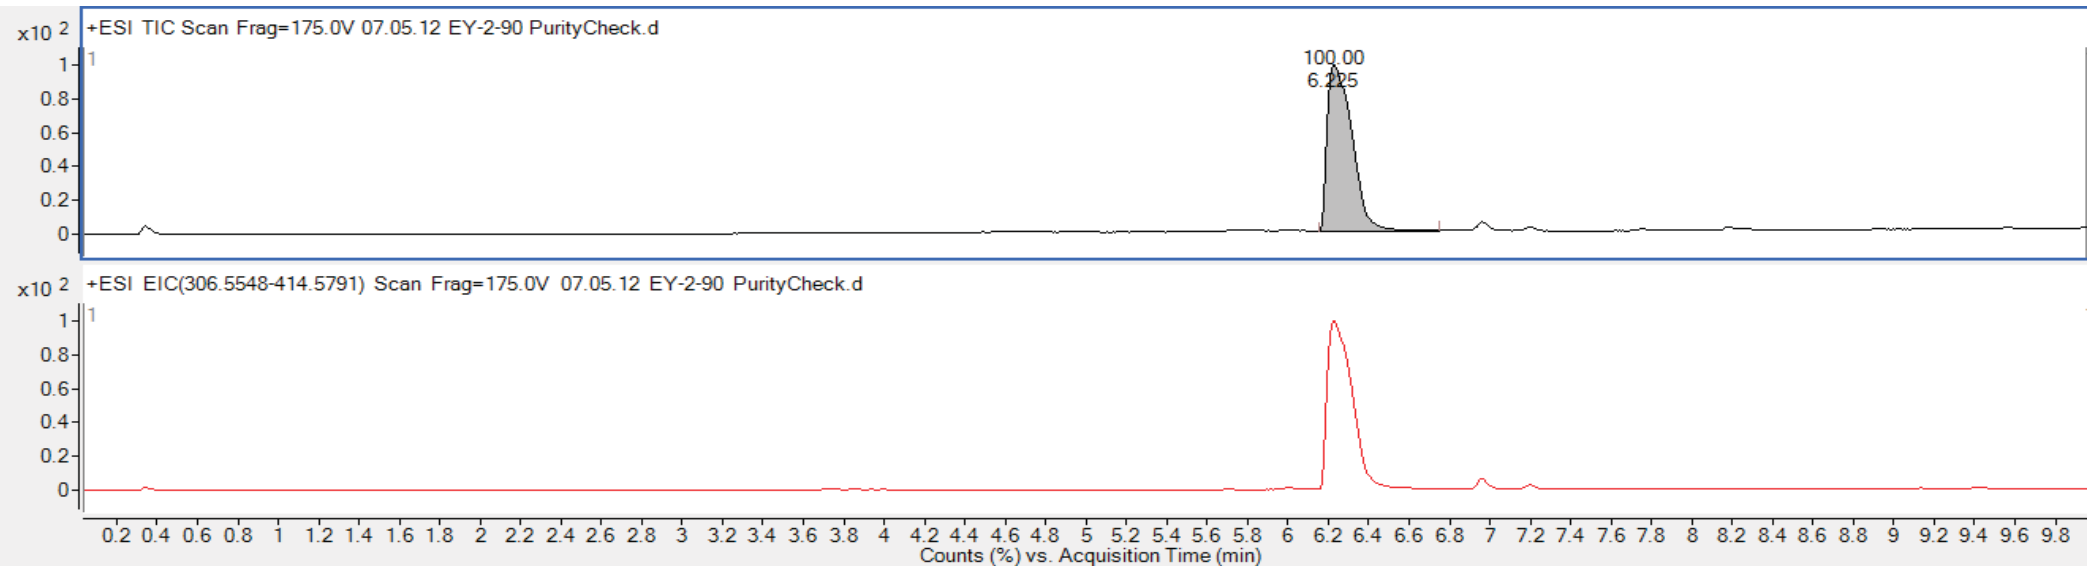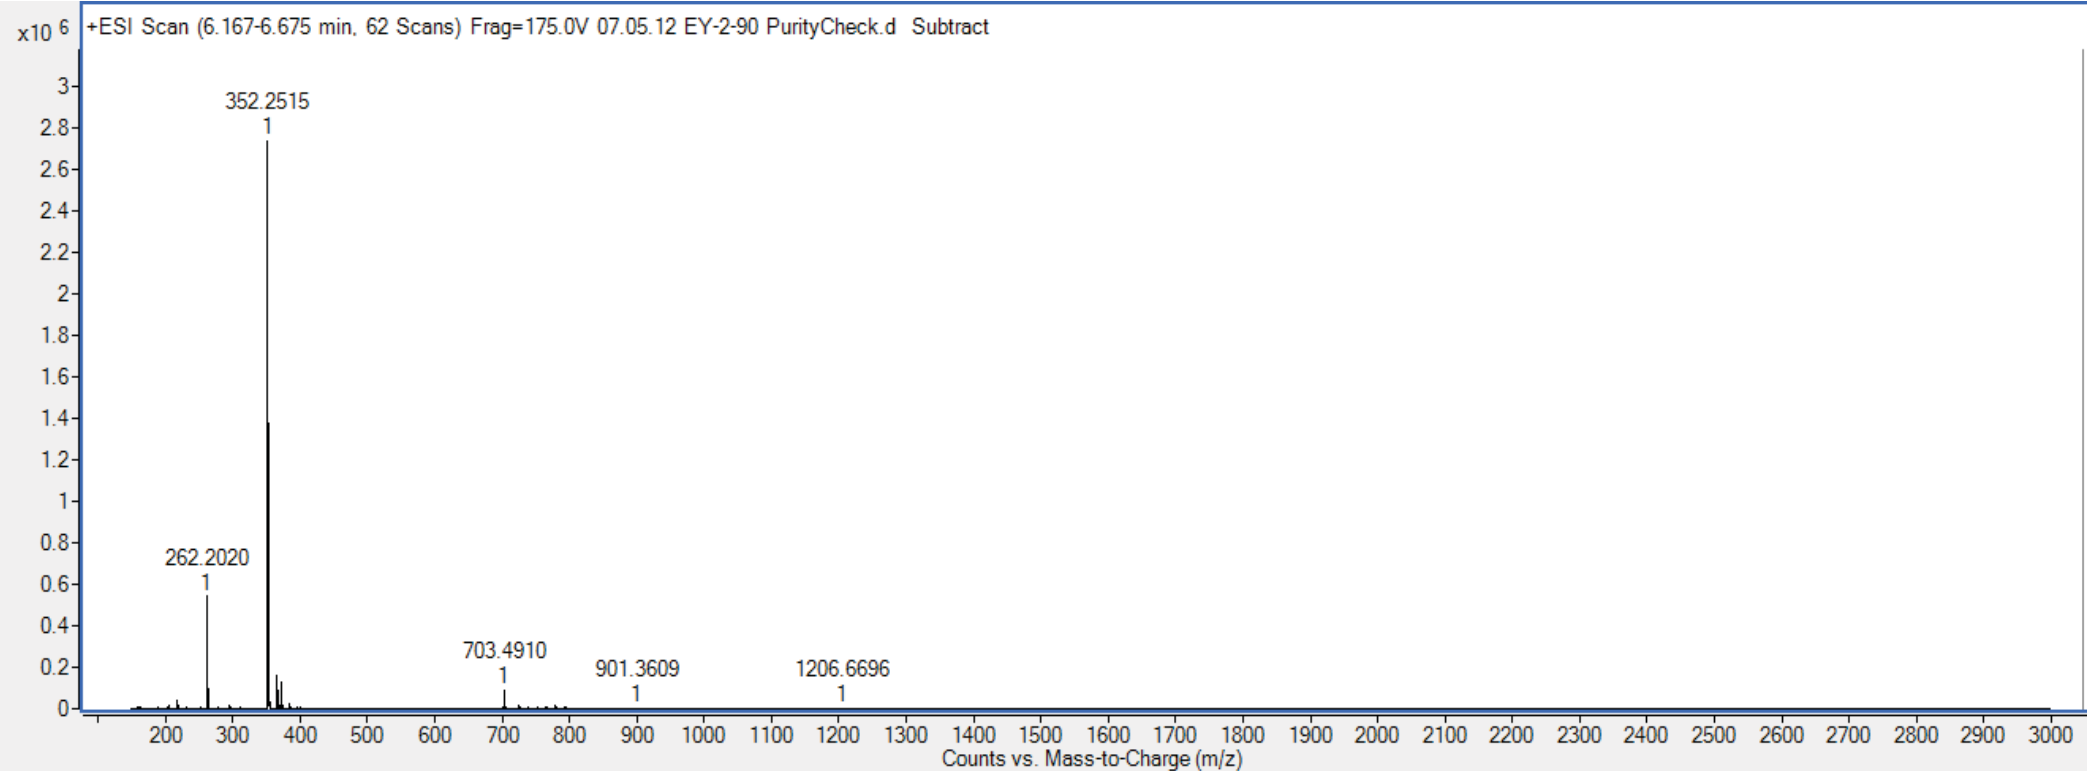



# 18c <sup>1</sup>H NMR

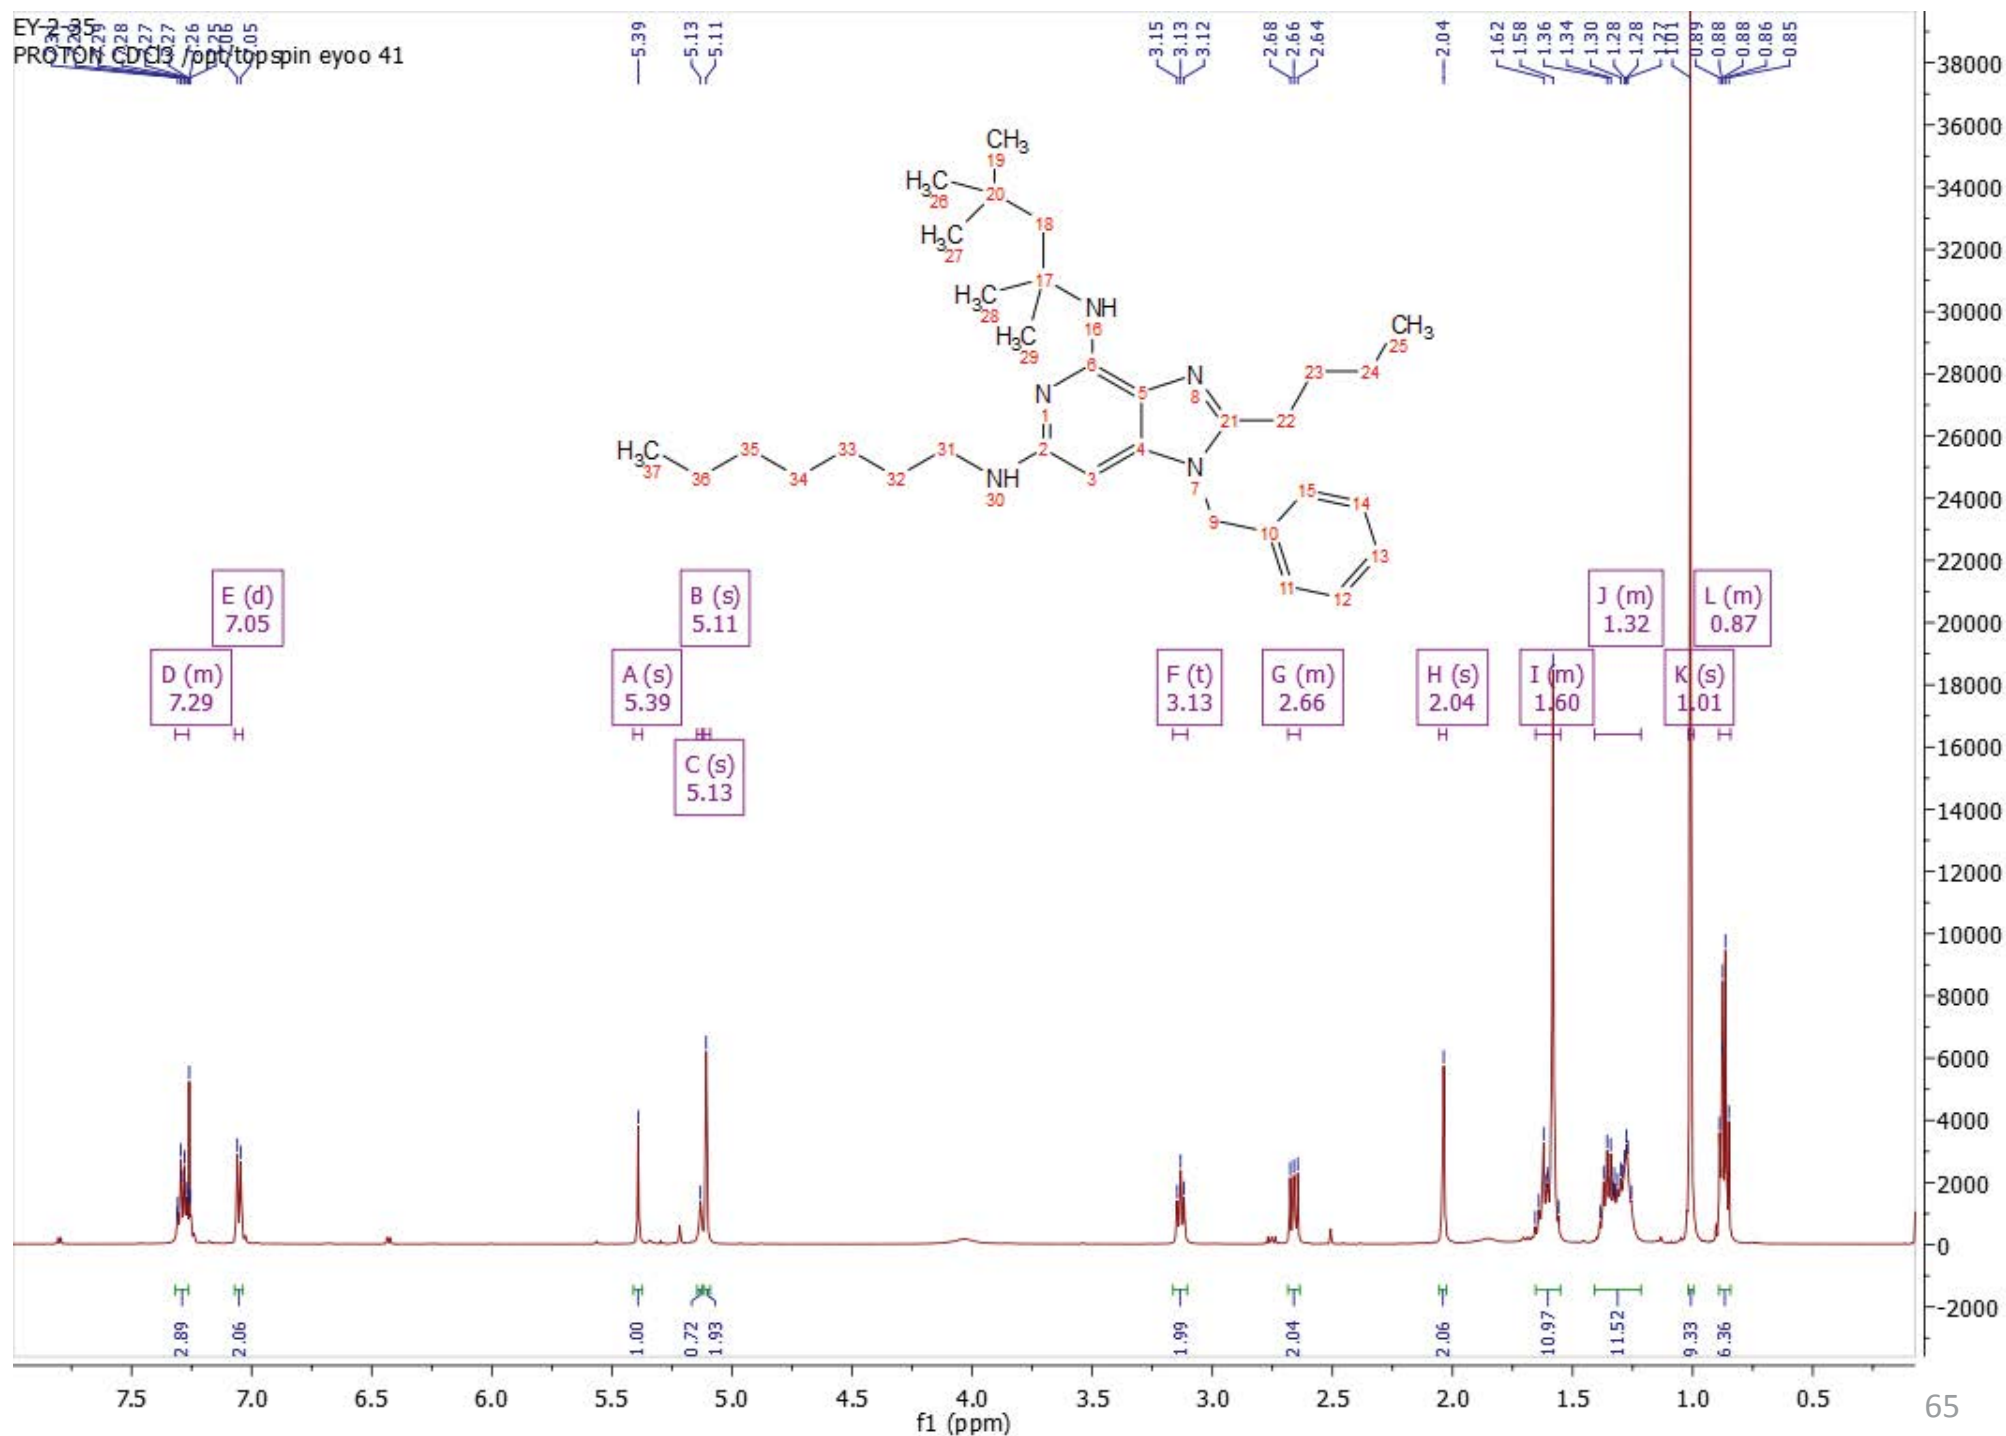

# 18c <sup>13</sup>C NMR

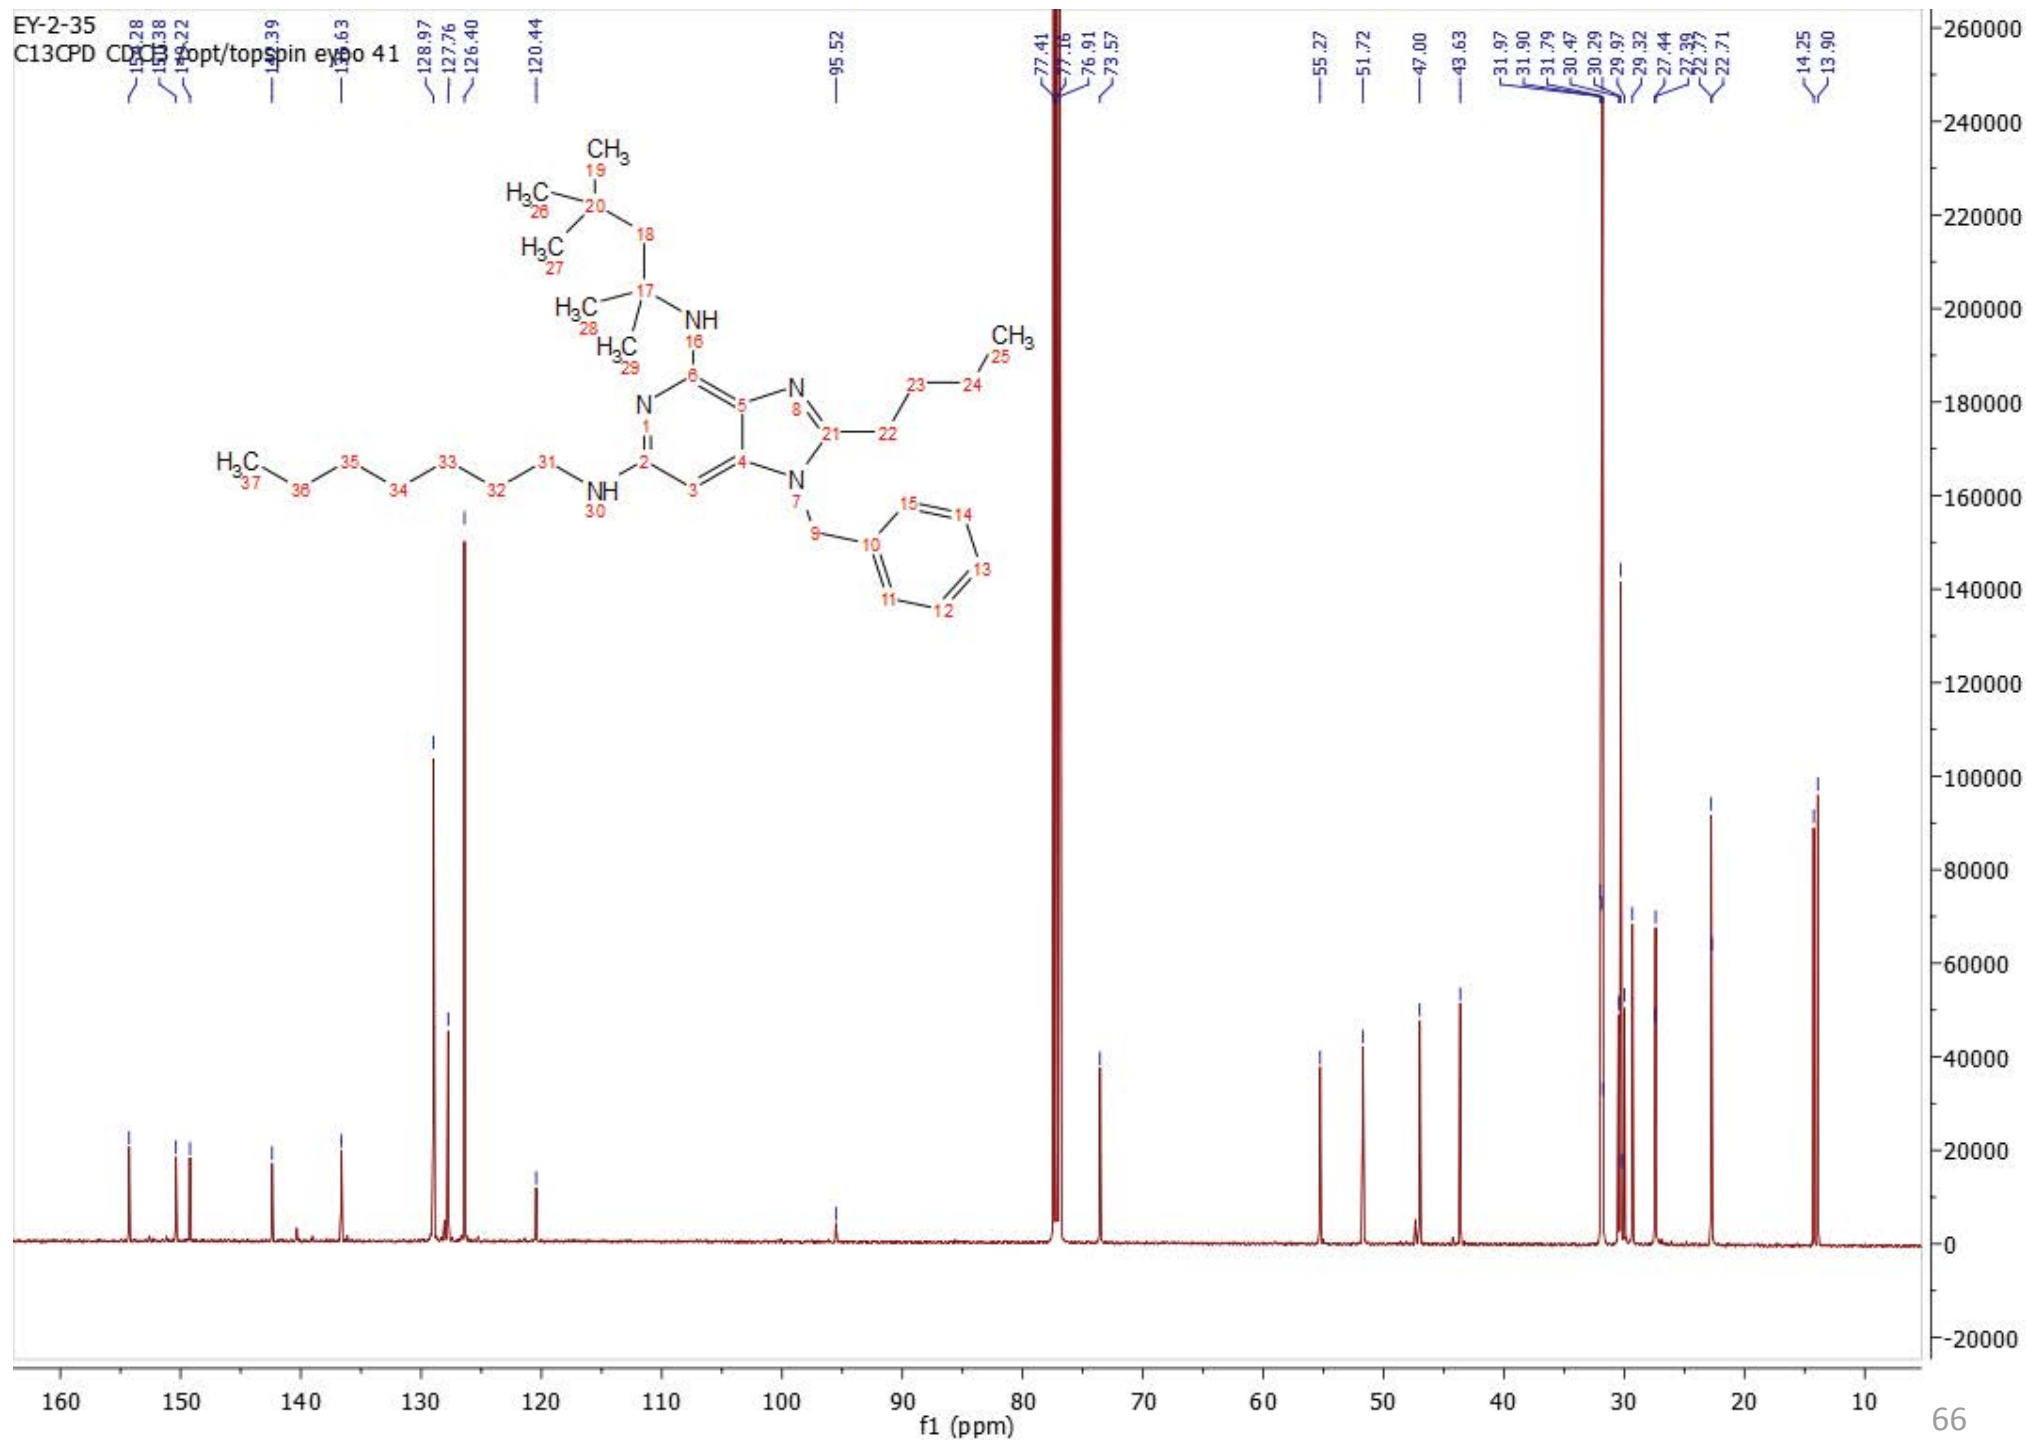

# 18c MS

|               |                      |             |                      |                 |              |                        |                      |
|---------------|----------------------|-------------|----------------------|-----------------|--------------|------------------------|----------------------|
| Sample Name   | 05.14.12 EY-2-35 tub | Position    | Vial 1               | Instrument Name | Instrument 1 | User Name              |                      |
| Inj Vol       | -1                   | InjPosition |                      | SampleType      | Sample       | IRM Calibration Status | Success              |
| Data Filename | 05.14.12 EY-2-35 tub | ACQ Method  | Water-ACN Infusion M | Comment         |              | Acquired Time          | 5/14/2012 5:26:52 PM |

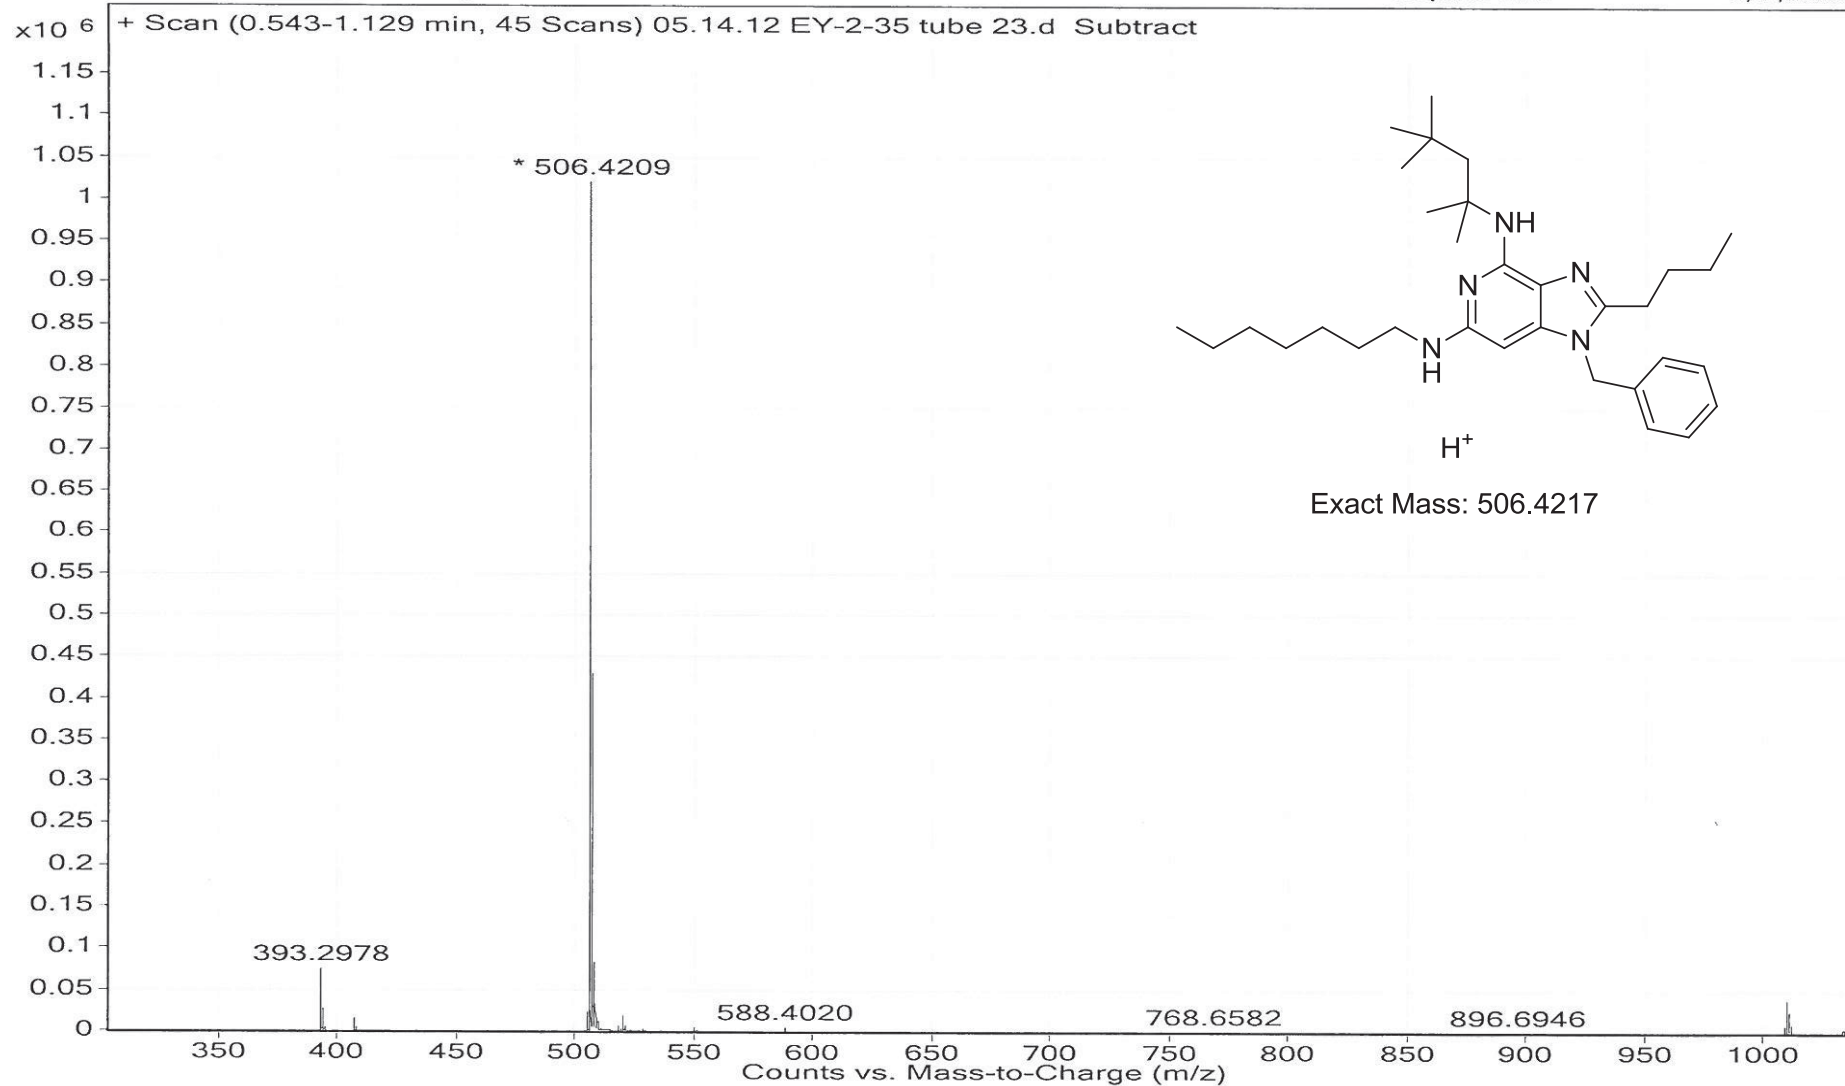

# 19c <sup>1</sup>H NMR

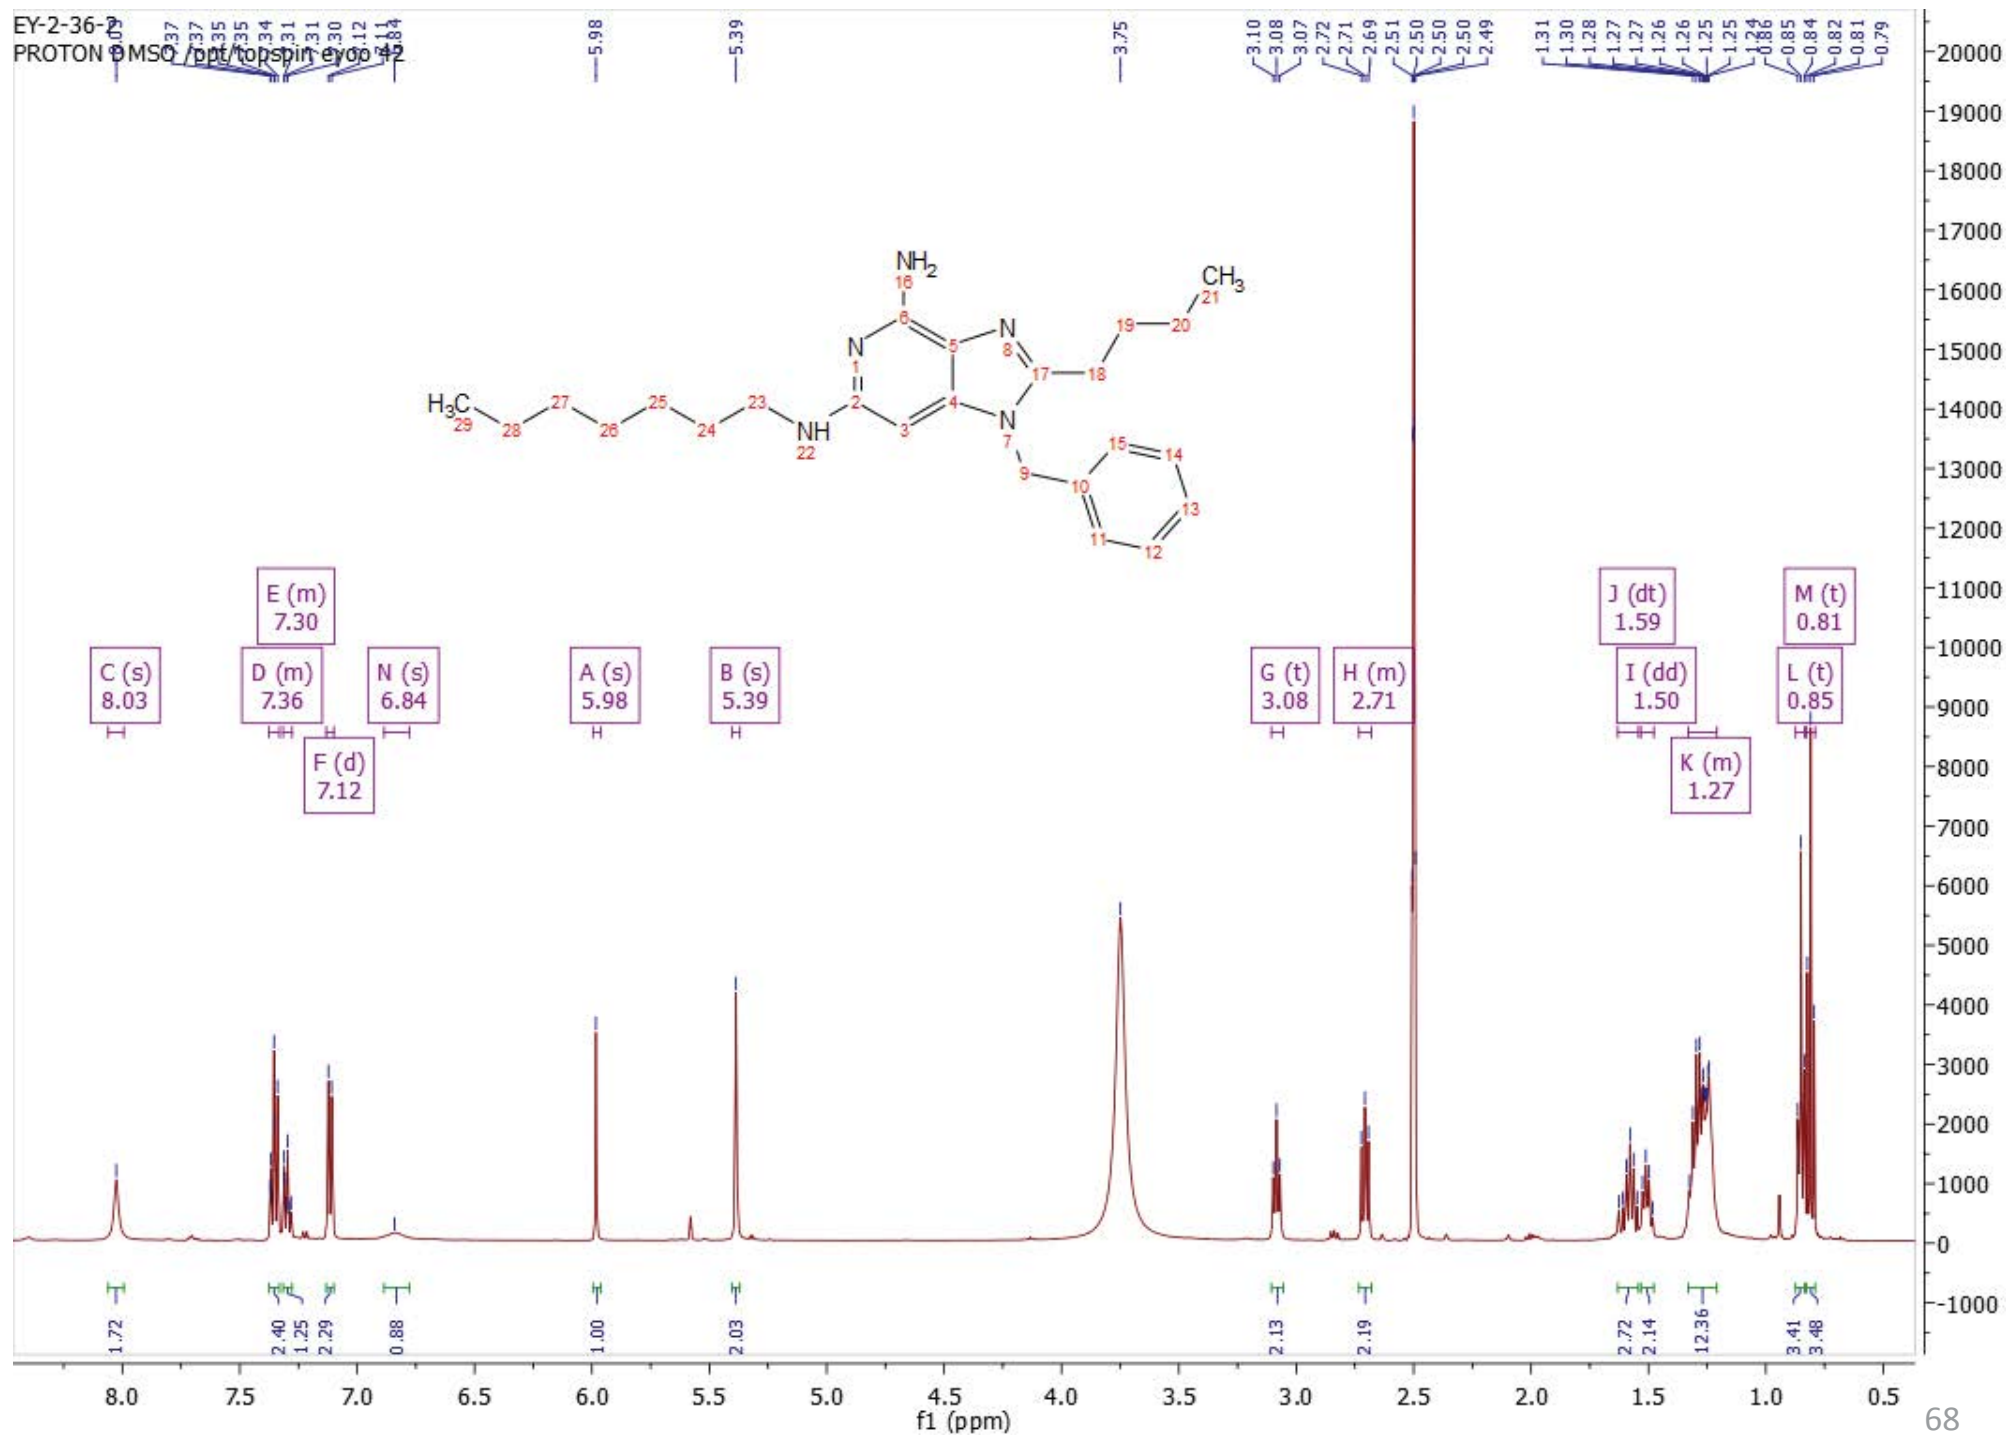

# 19c <sup>13</sup>C NMR

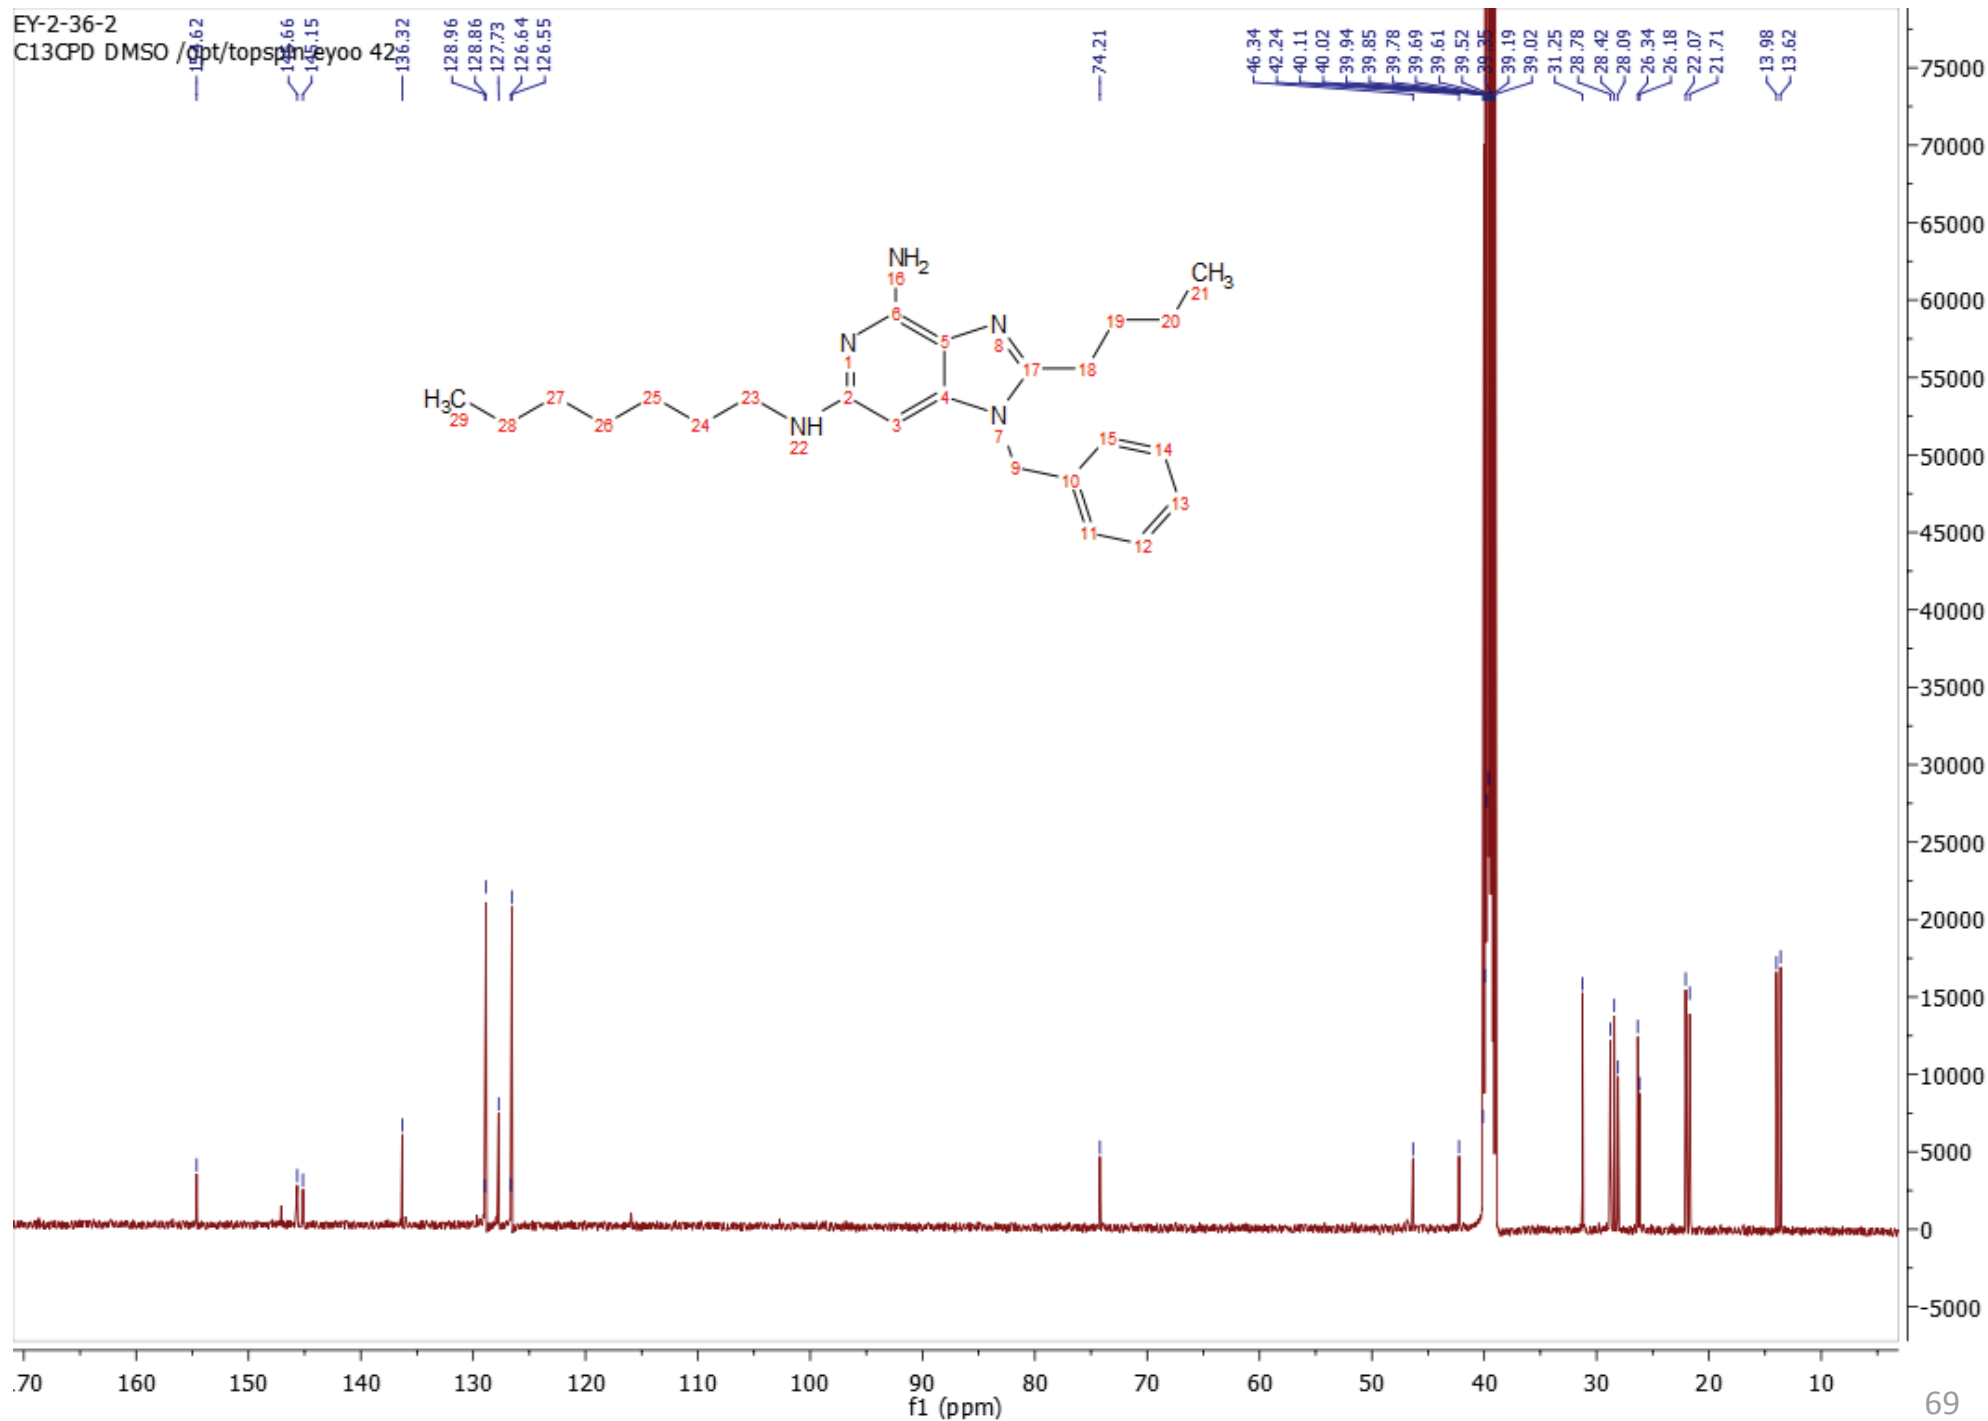

# 19c MS

|               |                    |             |                      |                 |              |                        |                      |
|---------------|--------------------|-------------|----------------------|-----------------|--------------|------------------------|----------------------|
| Sample Name   | 05.15.12 EY-2-36   | Position    | Vial 1               | Instrument Name | Instrument 1 | User Name              |                      |
| Inj Vol       | -1                 | InjPosition |                      | SampleType      | Sample       | IRM Calibration Status | Success              |
| Data Filename | 05.15.12 EY-2-36.d | ACQ Method  | Water-ACN Infusion M | Comment         |              | Acquired Time          | 5/15/2012 8:30:39 AM |

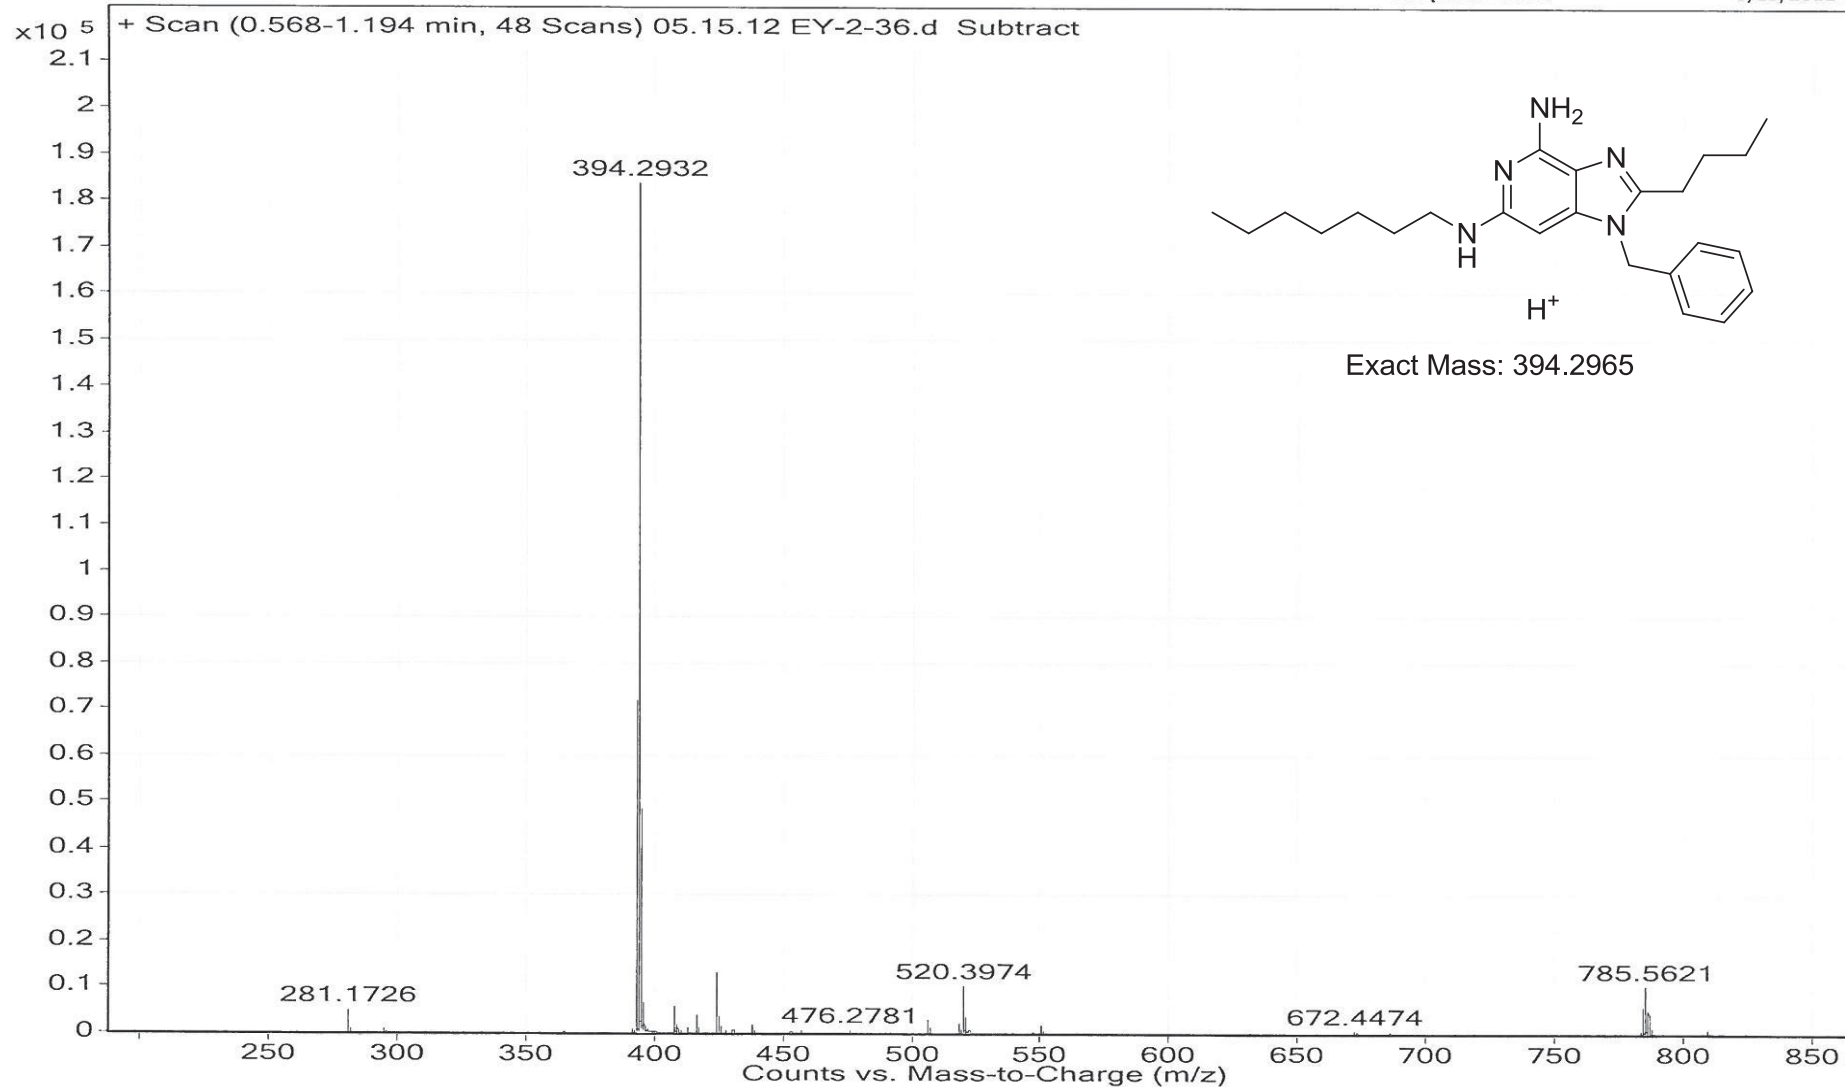

## 19c LC-MS

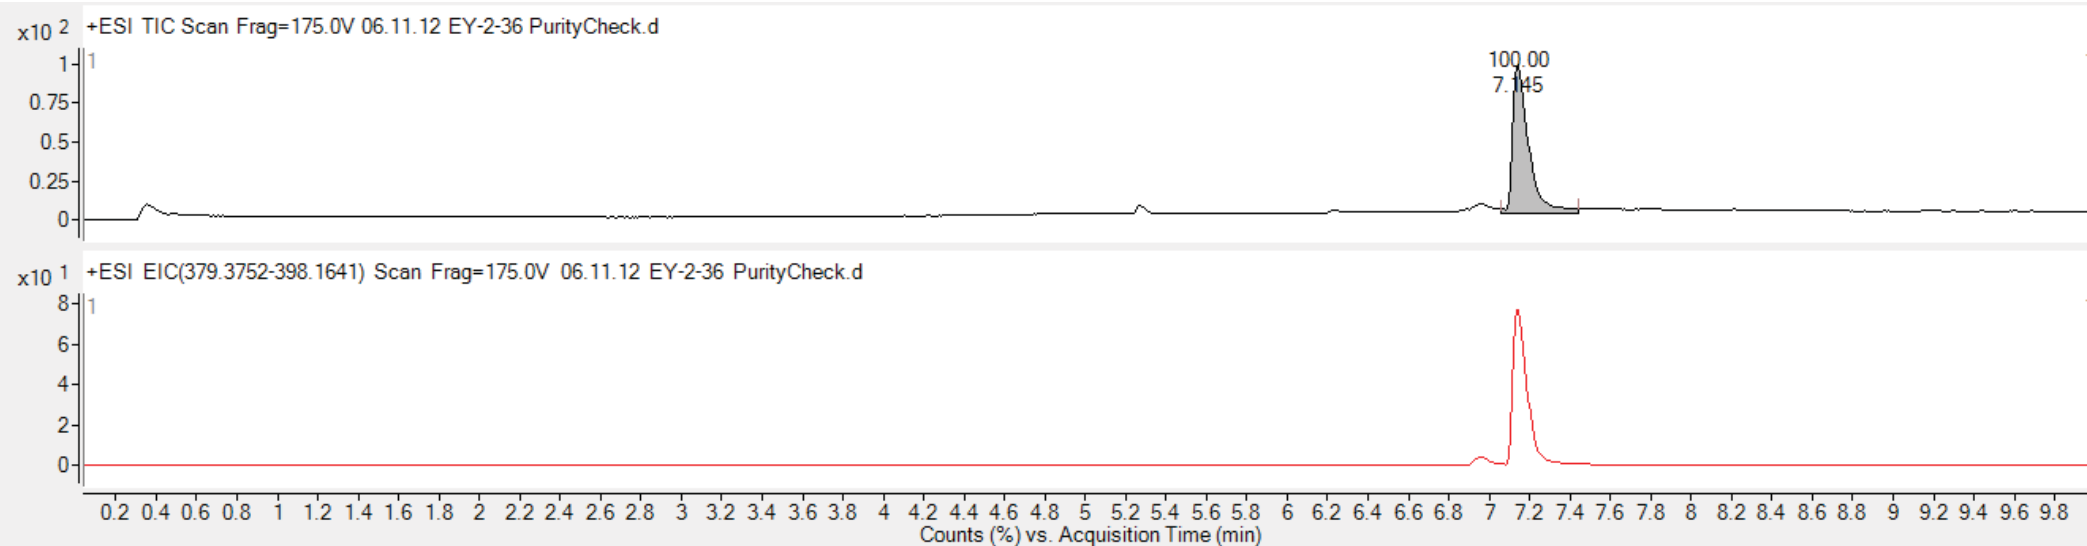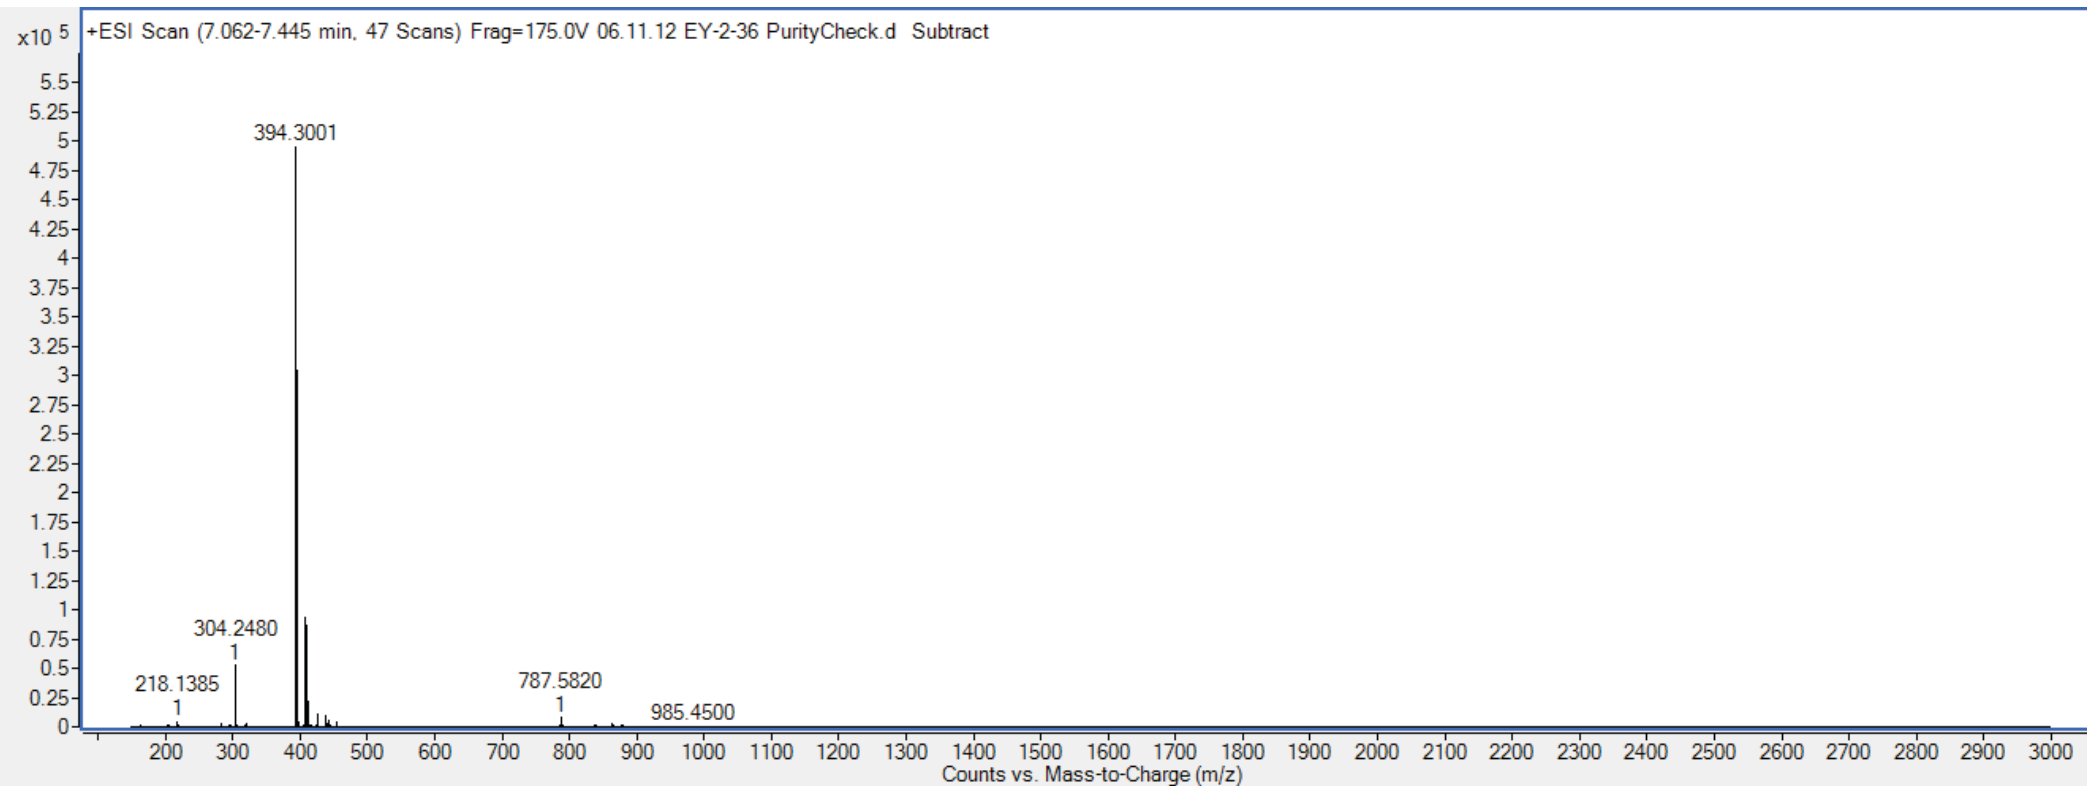



# 18d <sup>1</sup>H NMR

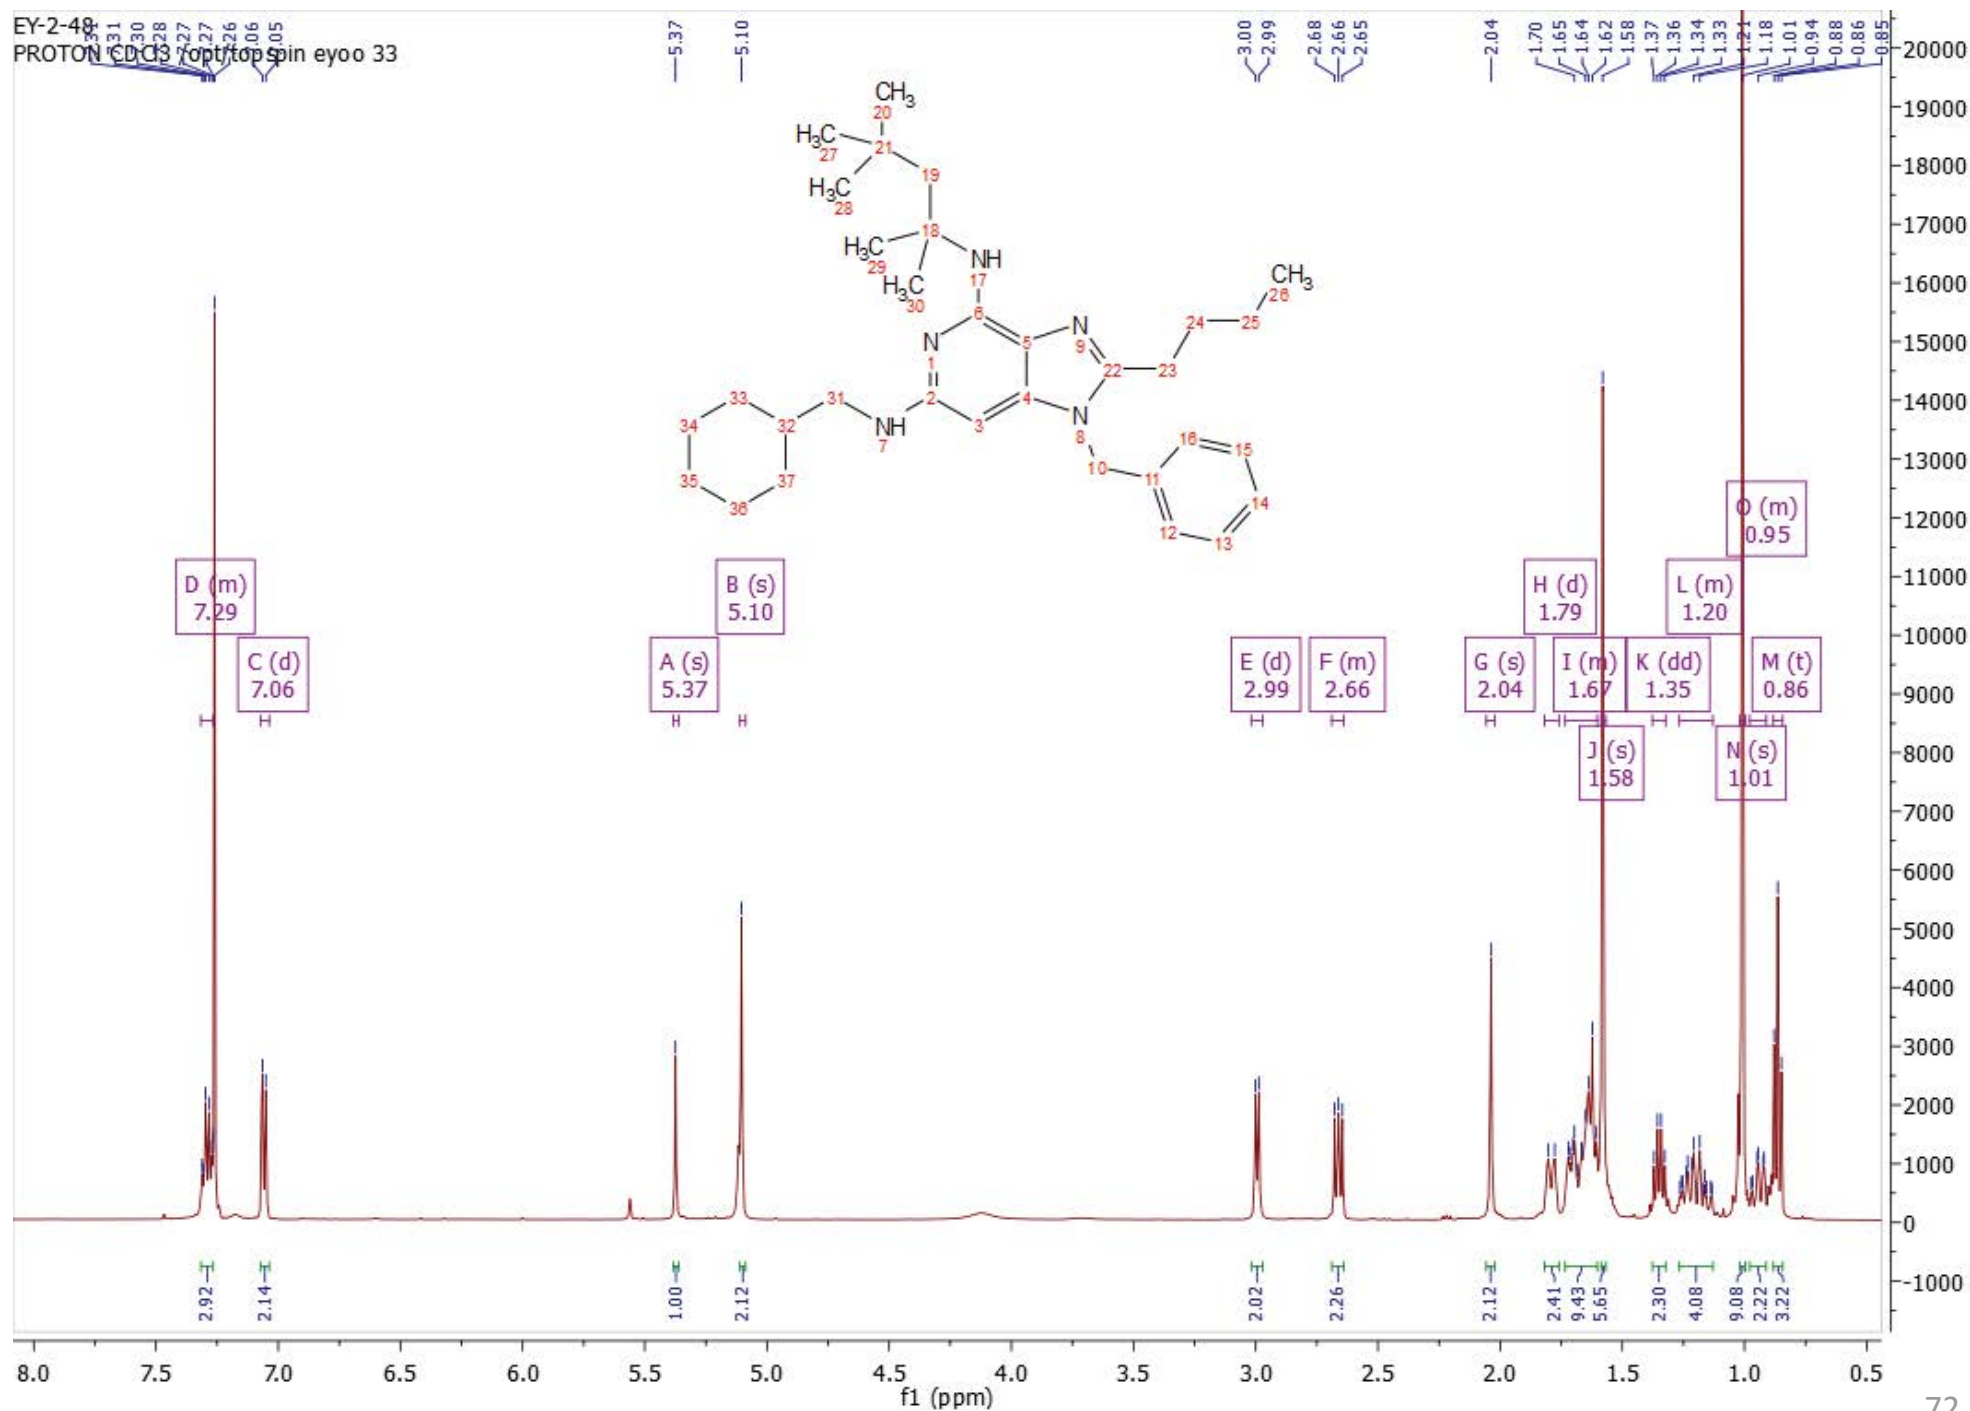



# 18d <sup>13</sup>C NMR

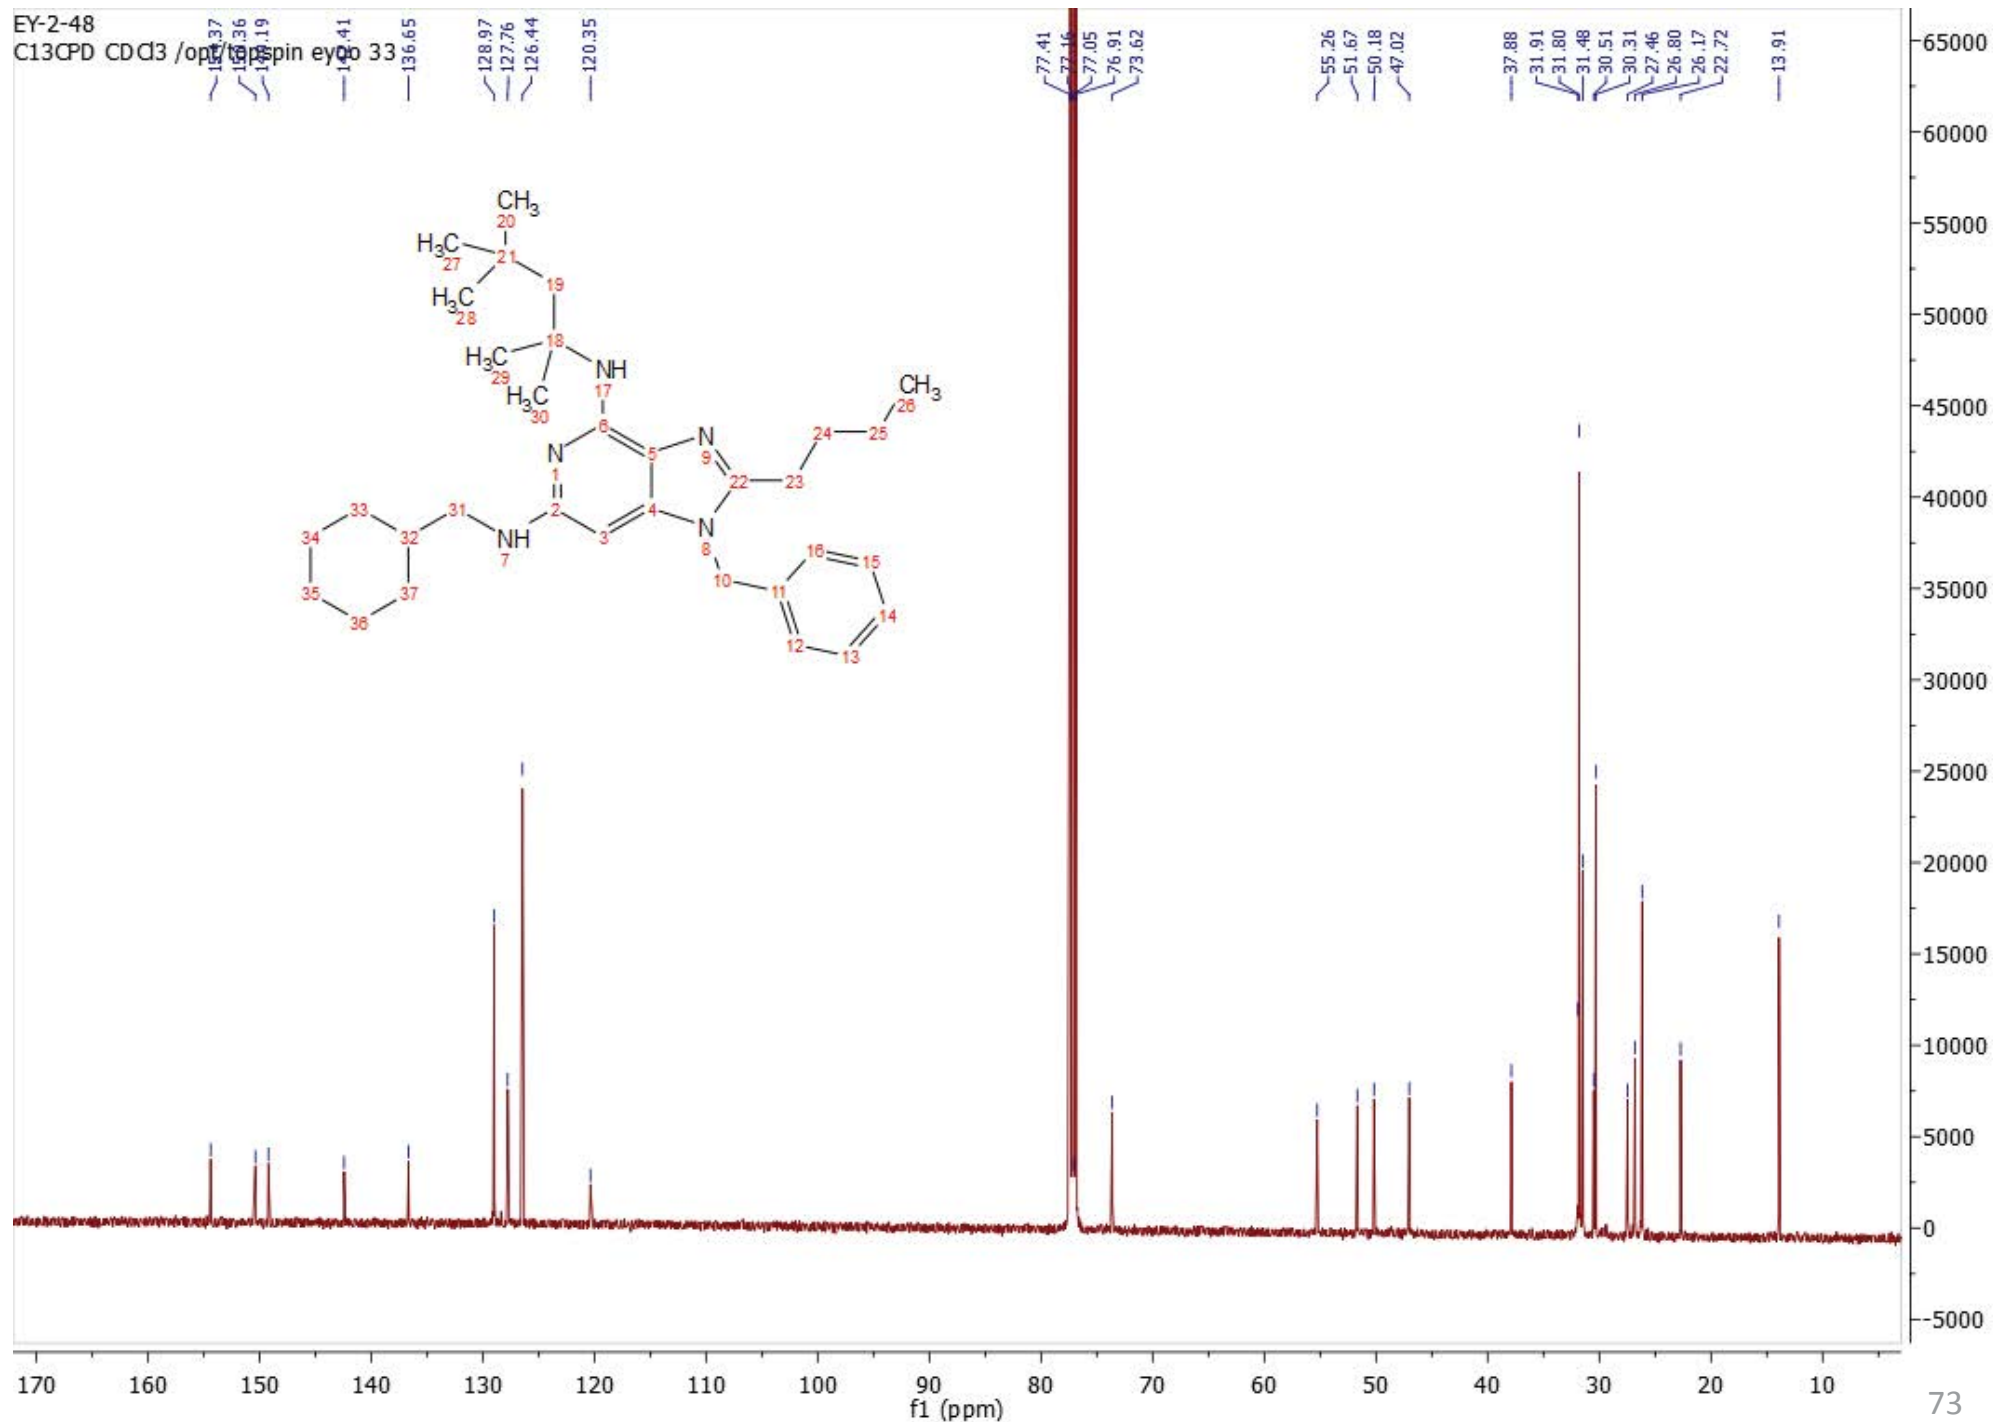

# 18d MS

|               |                    |             |                      |                 |              |                        |                      |
|---------------|--------------------|-------------|----------------------|-----------------|--------------|------------------------|----------------------|
| Sample Name   | 05.18.12 EY-2-48   | Position    | Vial 1               | Instrument Name | Instrument 1 | User Name              |                      |
| Inj Vol       | -1                 | InjPosition |                      | SampleType      | Sample       | IRM Calibration Status | Success              |
| Data Filename | 05.18.12 EY-2-48.d | ACQ Method  | Water-ACN Infusion M | Comment         |              | Acquired Time          | 5/18/2012 4:32:48 PM |

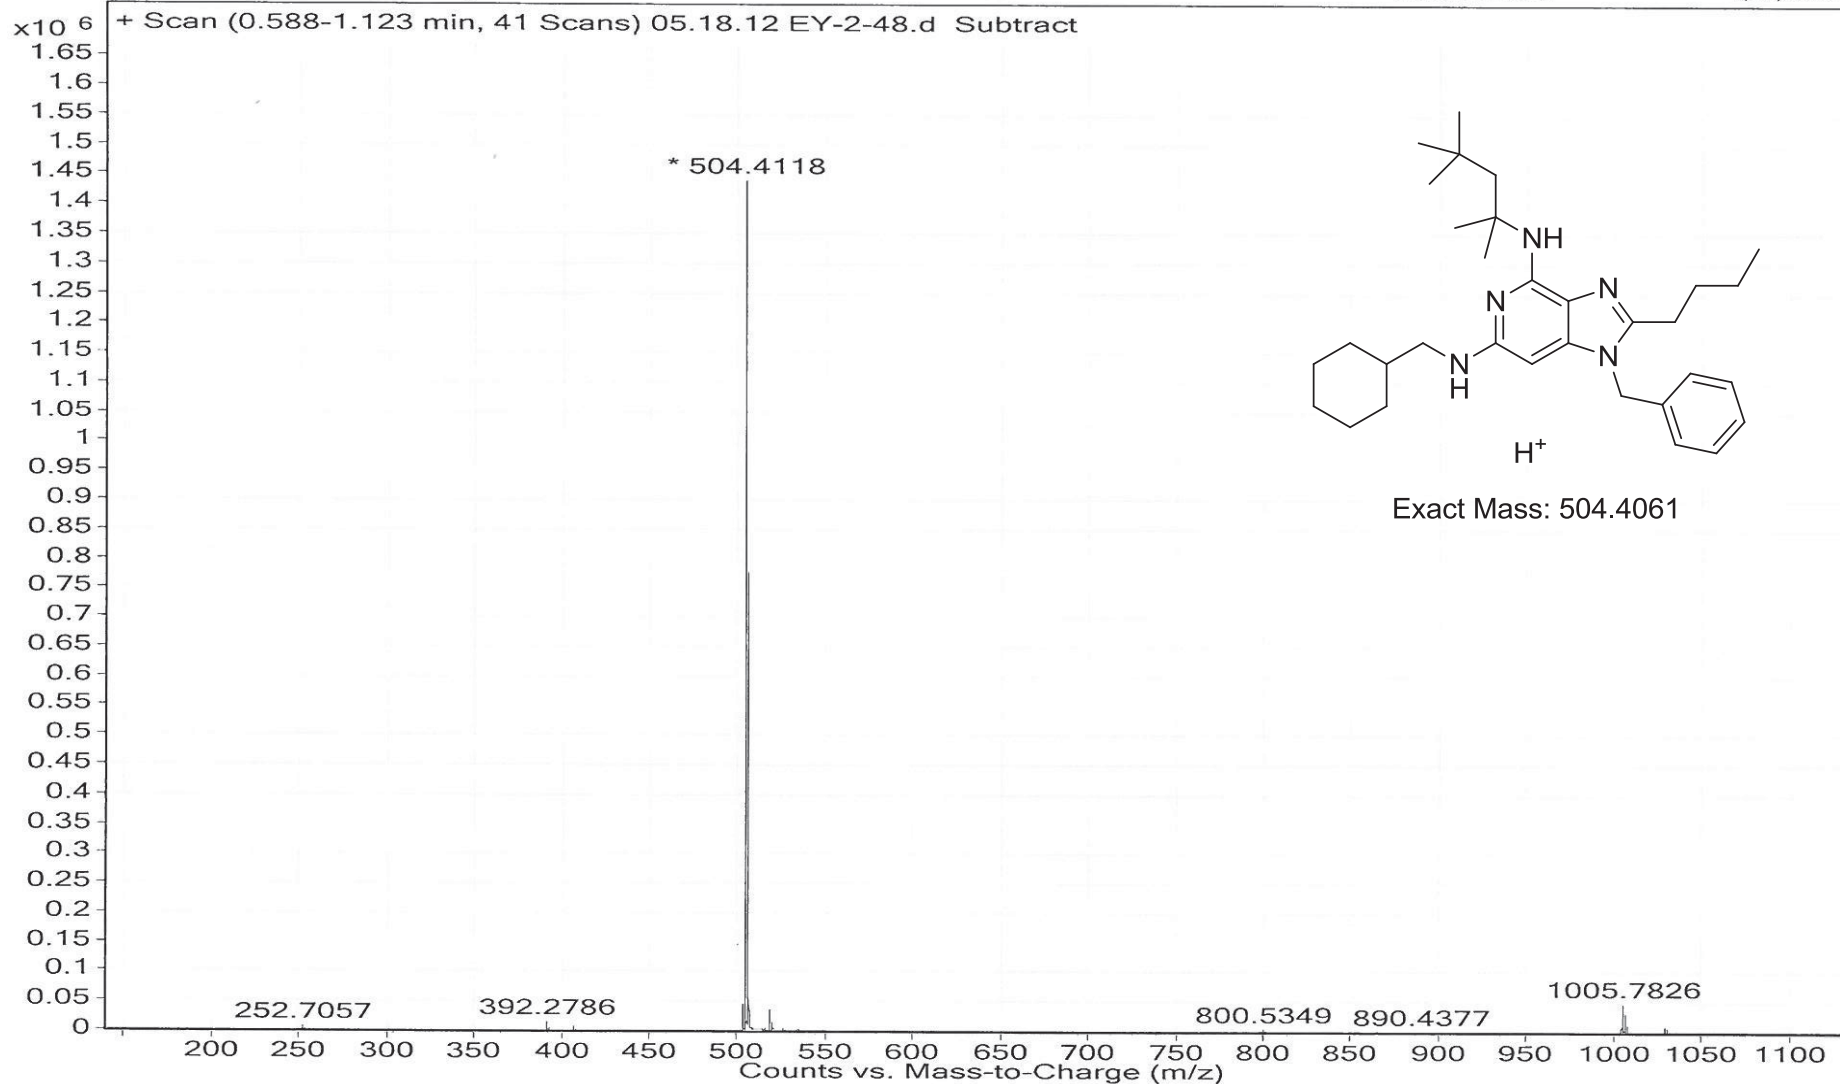

# 19d <sup>1</sup>H NMR

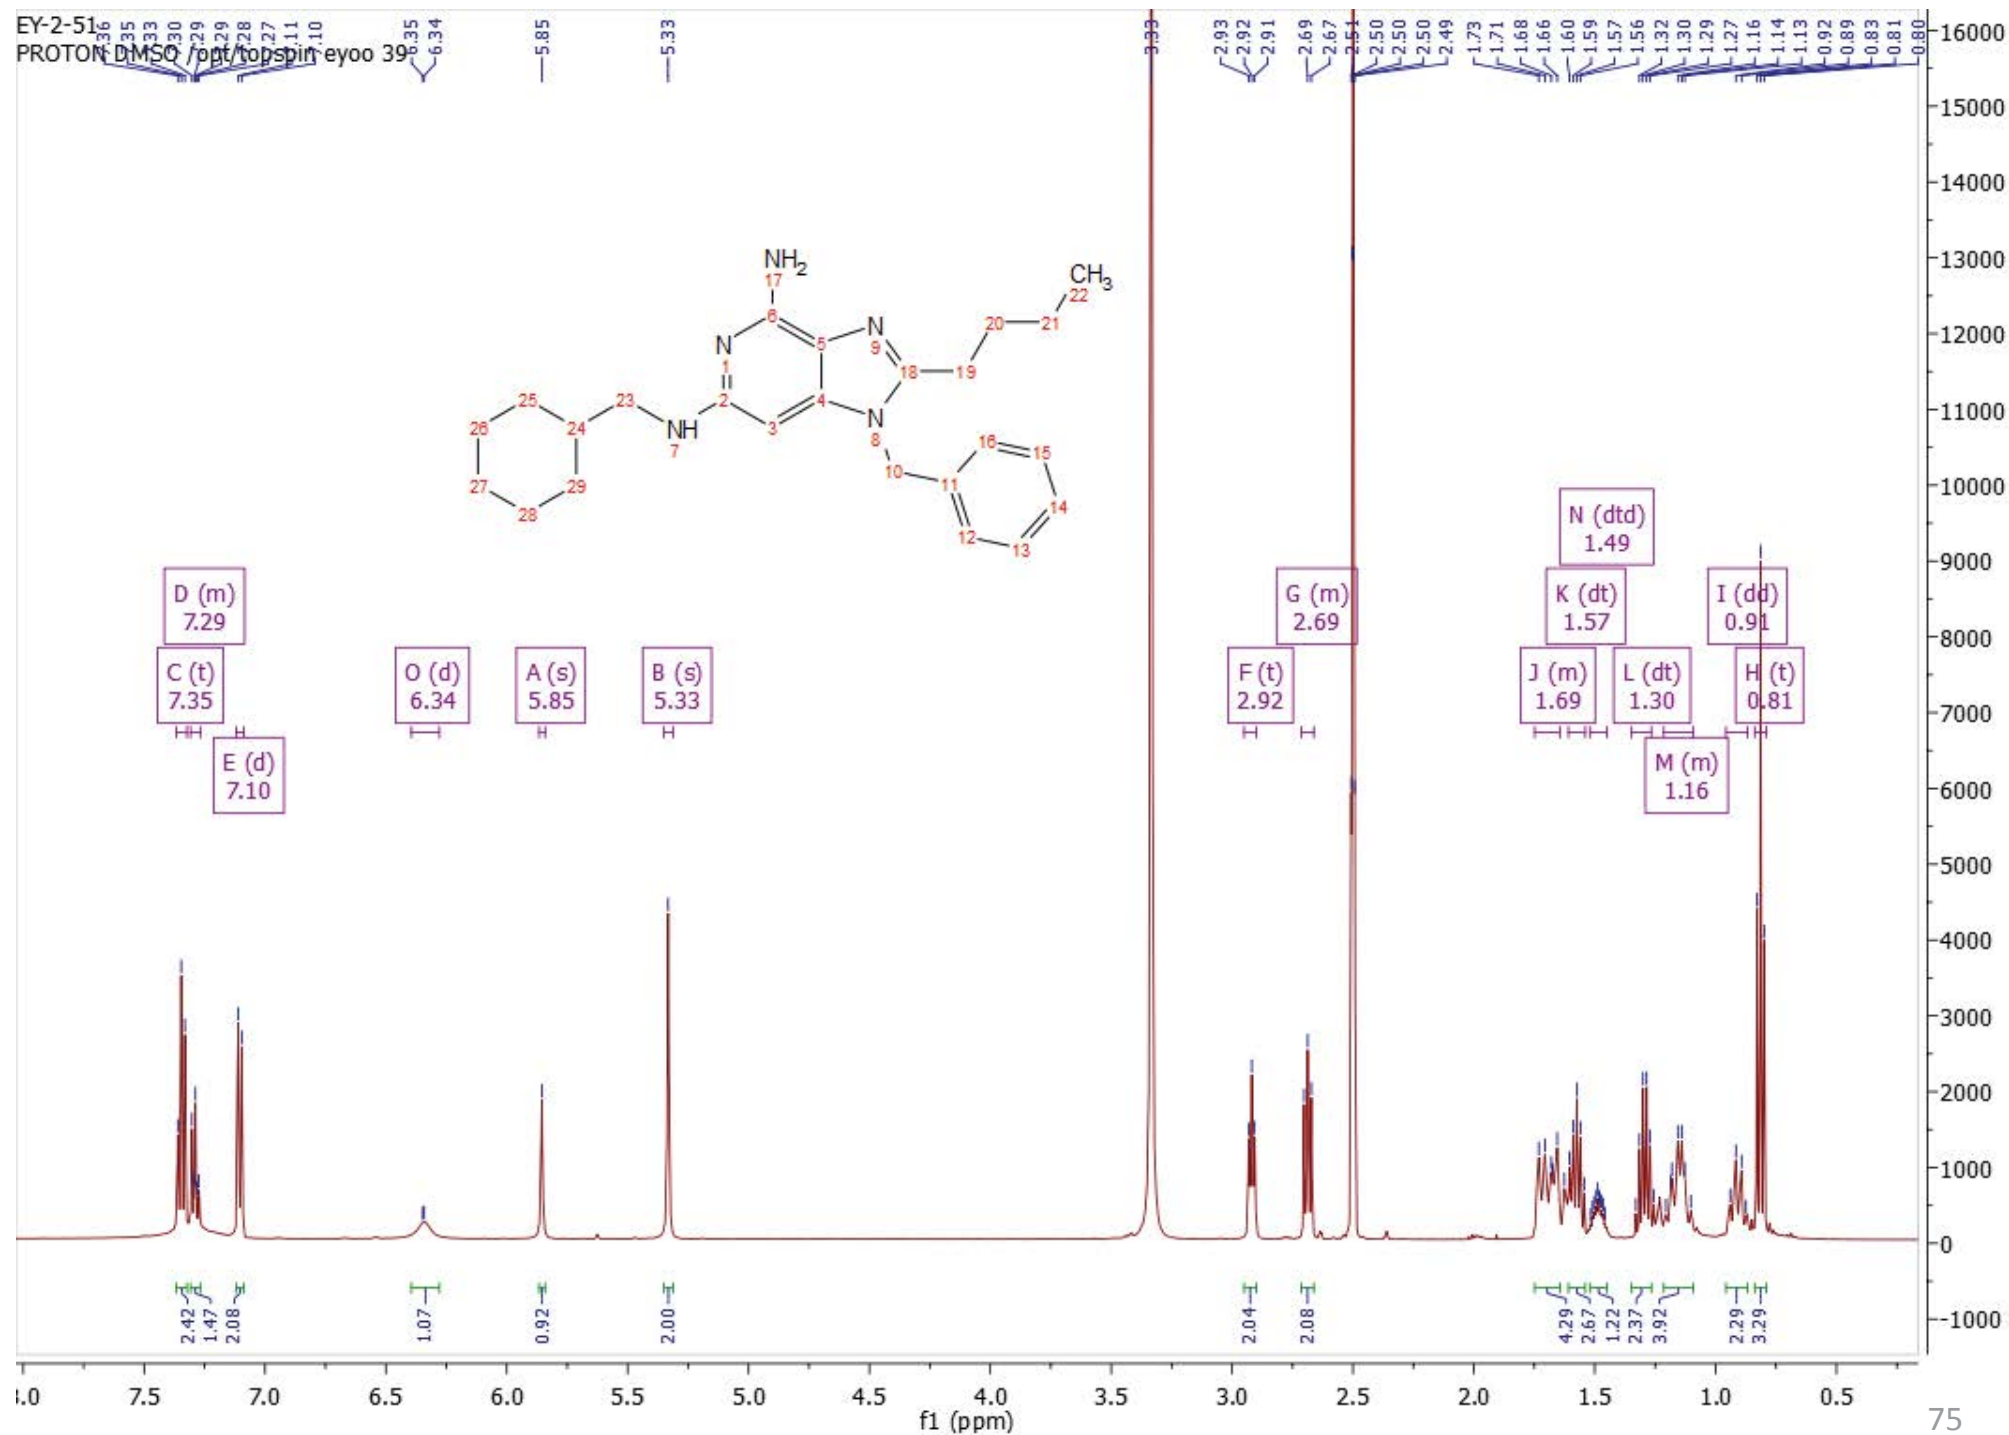

# 19d <sup>13</sup>C NMR

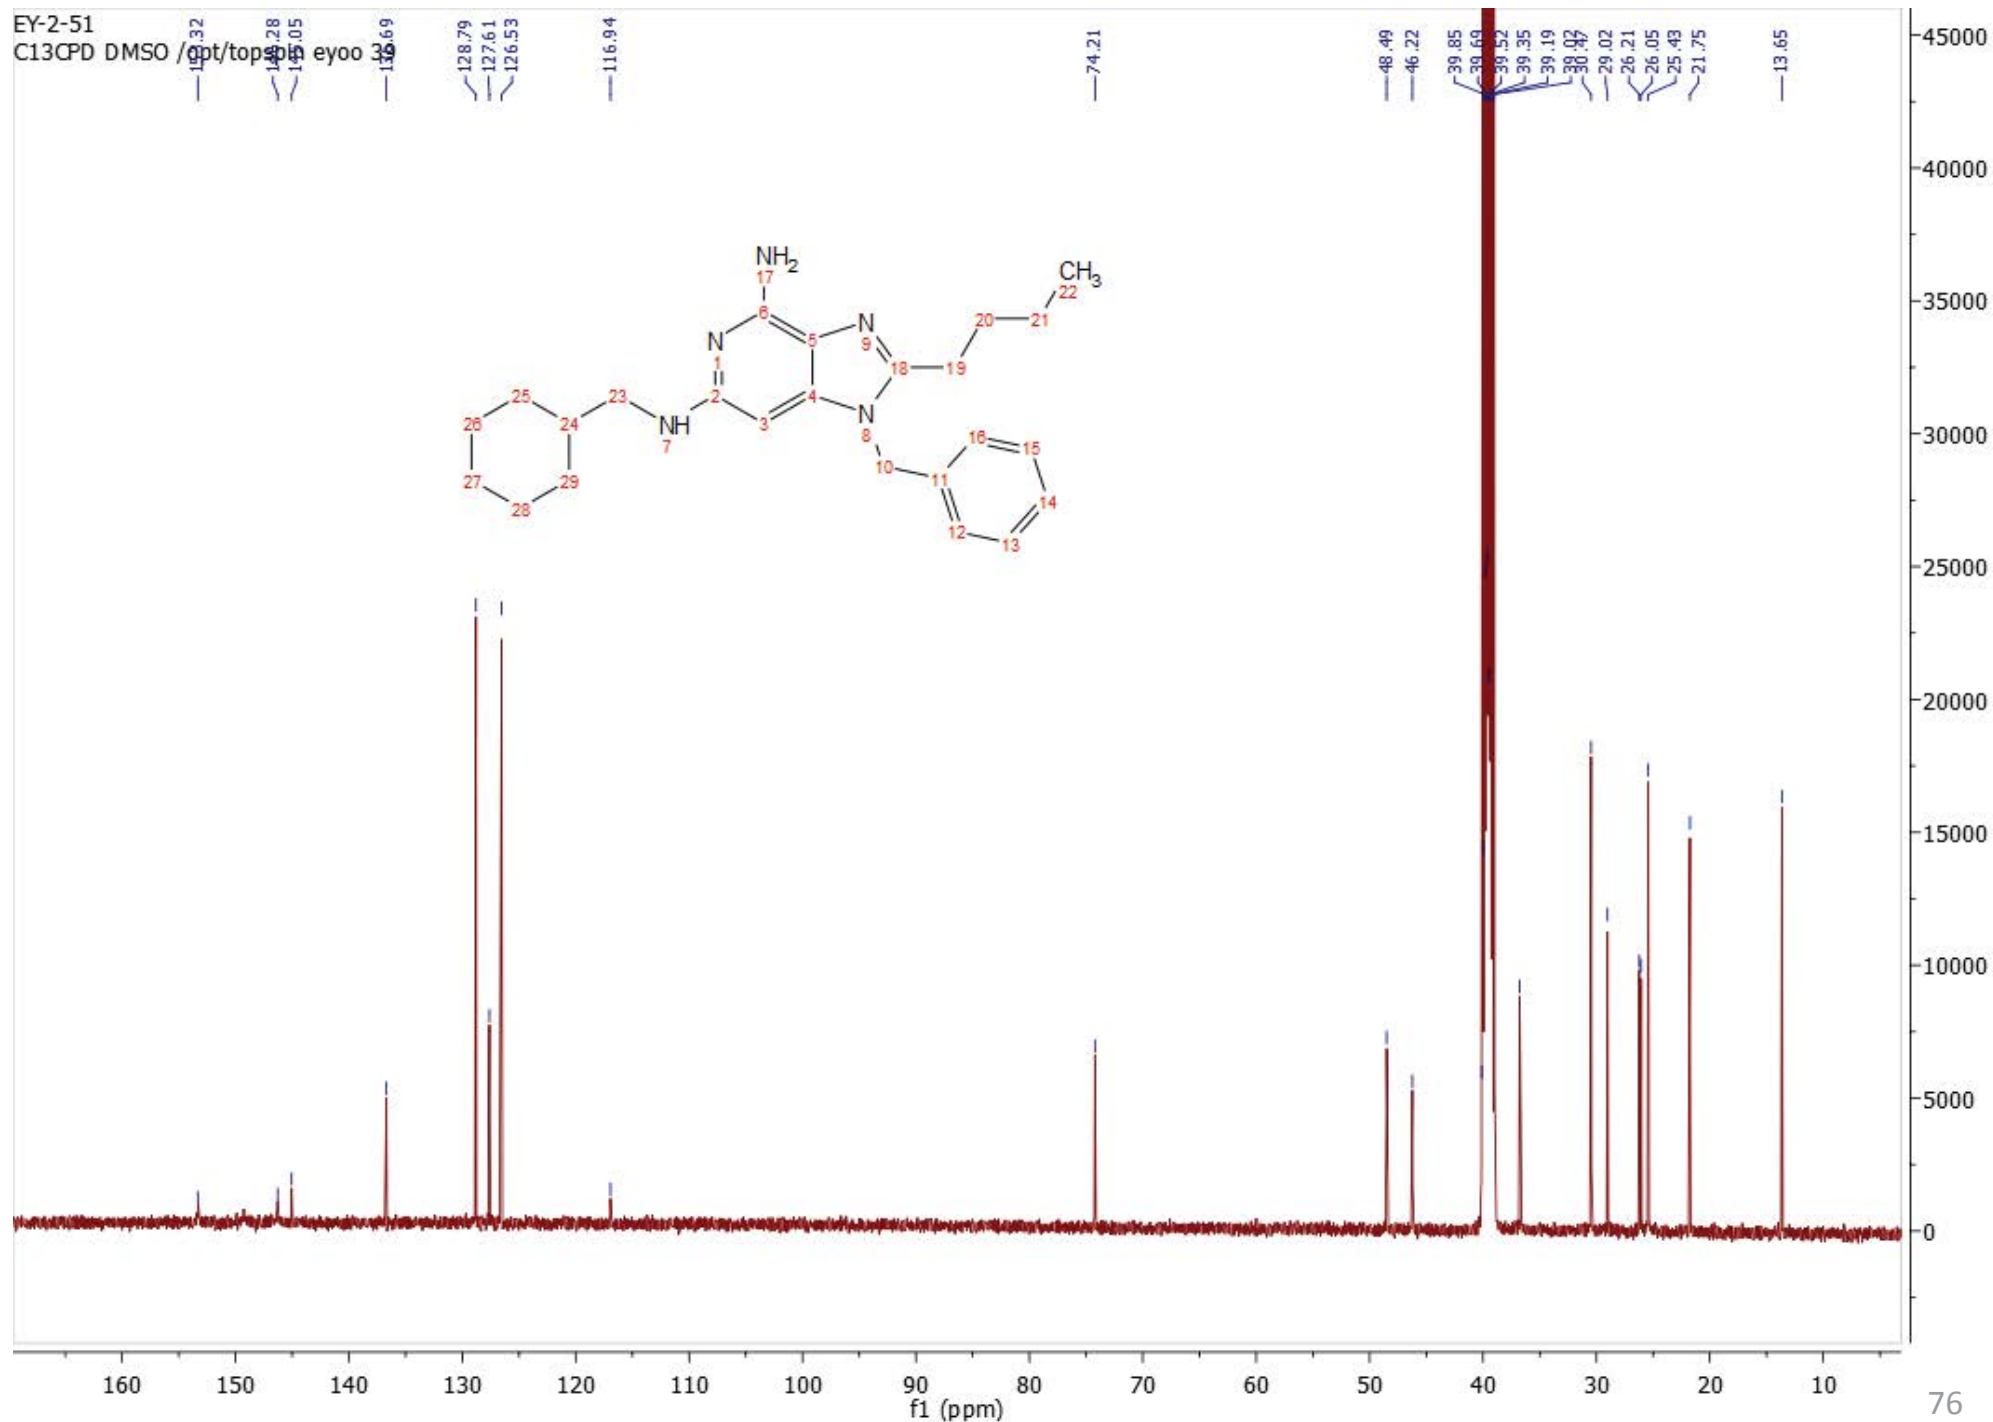

# 19d MS

|               |                      |             |                      |                 |              |                        |                       |
|---------------|----------------------|-------------|----------------------|-----------------|--------------|------------------------|-----------------------|
| Sample Name   | 05.21.12 EY-2-51 tub | Position    | Vial 1               | Instrument Name | Instrument 1 | User Name              |                       |
| Inj Vol       | -1                   | InjPosition |                      | SampleType      | Sample       | IRM Calibration Status | Success               |
| Data Filename | 05.21.12 EY-2-51 tub | ACQ Method  | Water-ACN Infusion M | Comment         |              | Acquired Time          | 5/21/2012 11:28:12 AM |

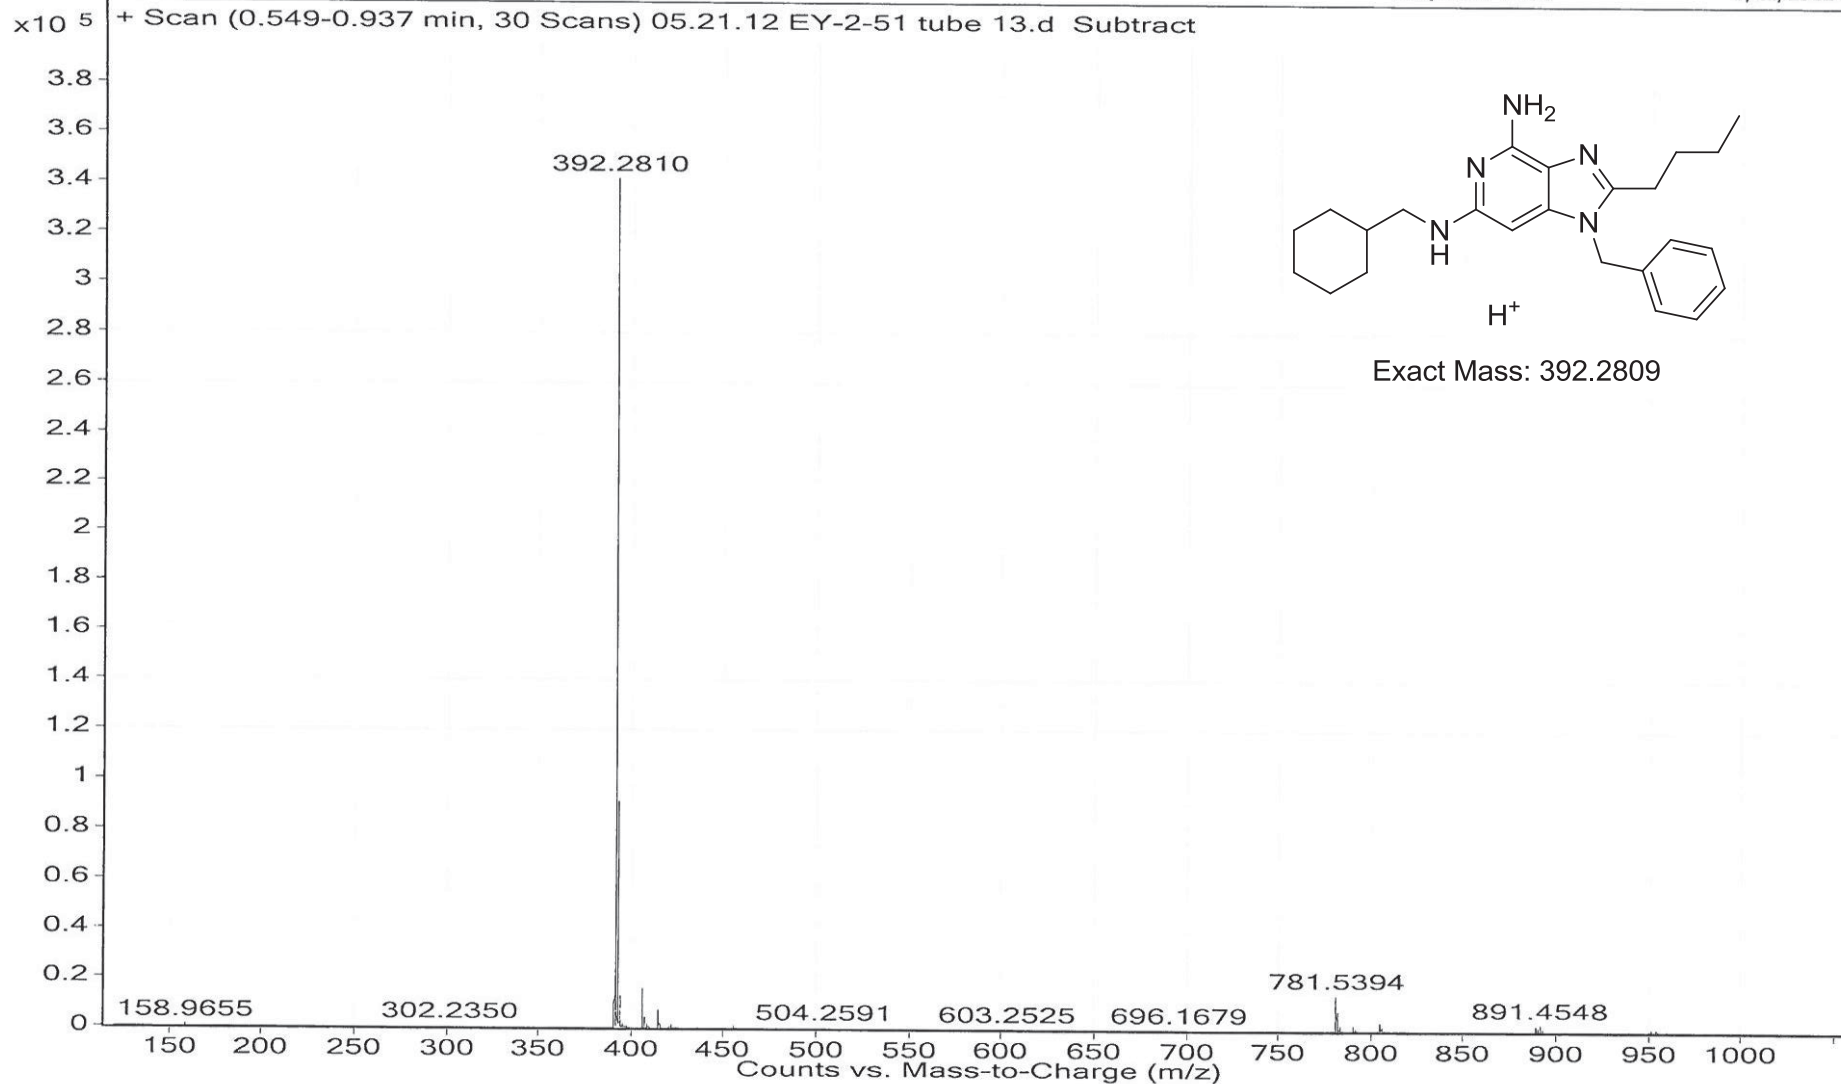

# 19d LC-MS

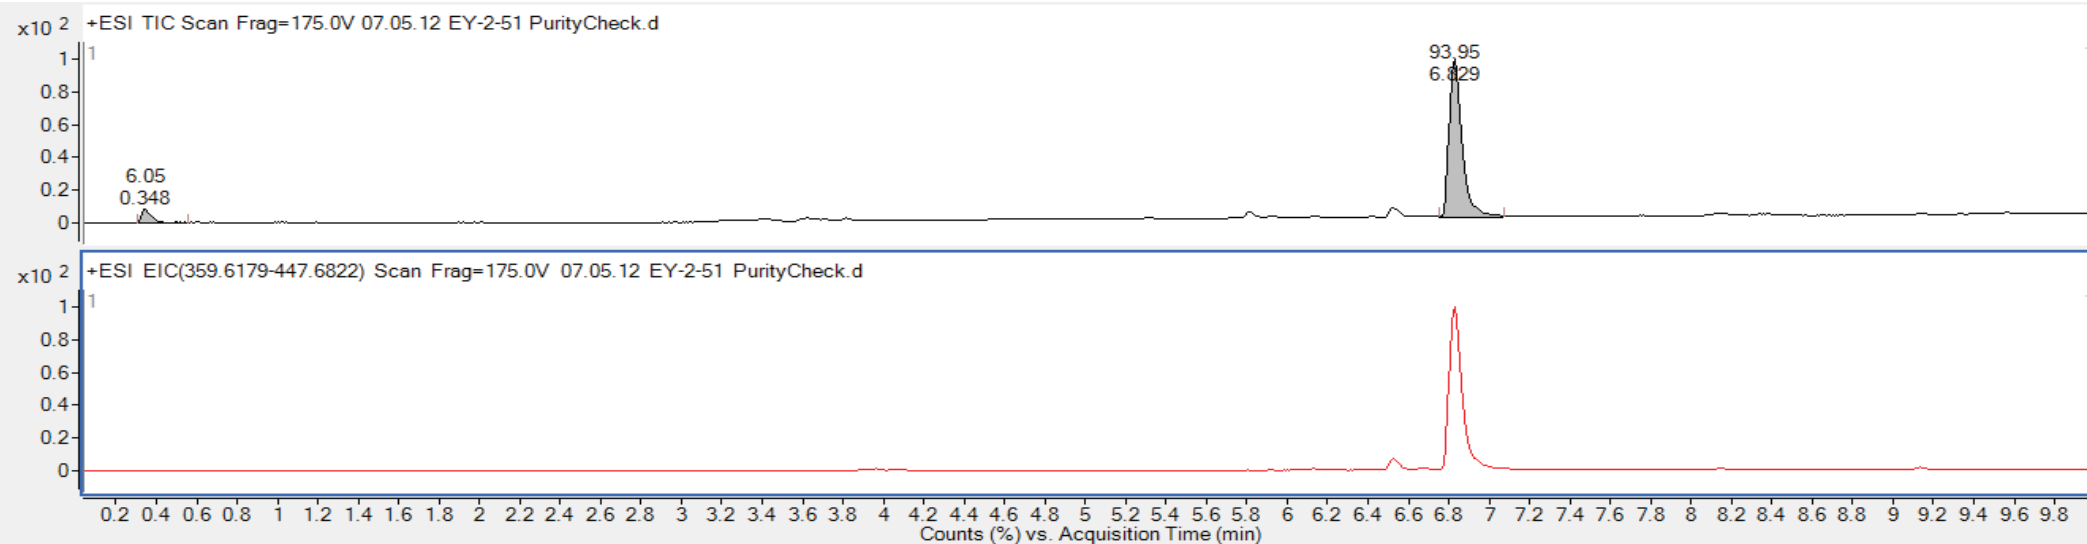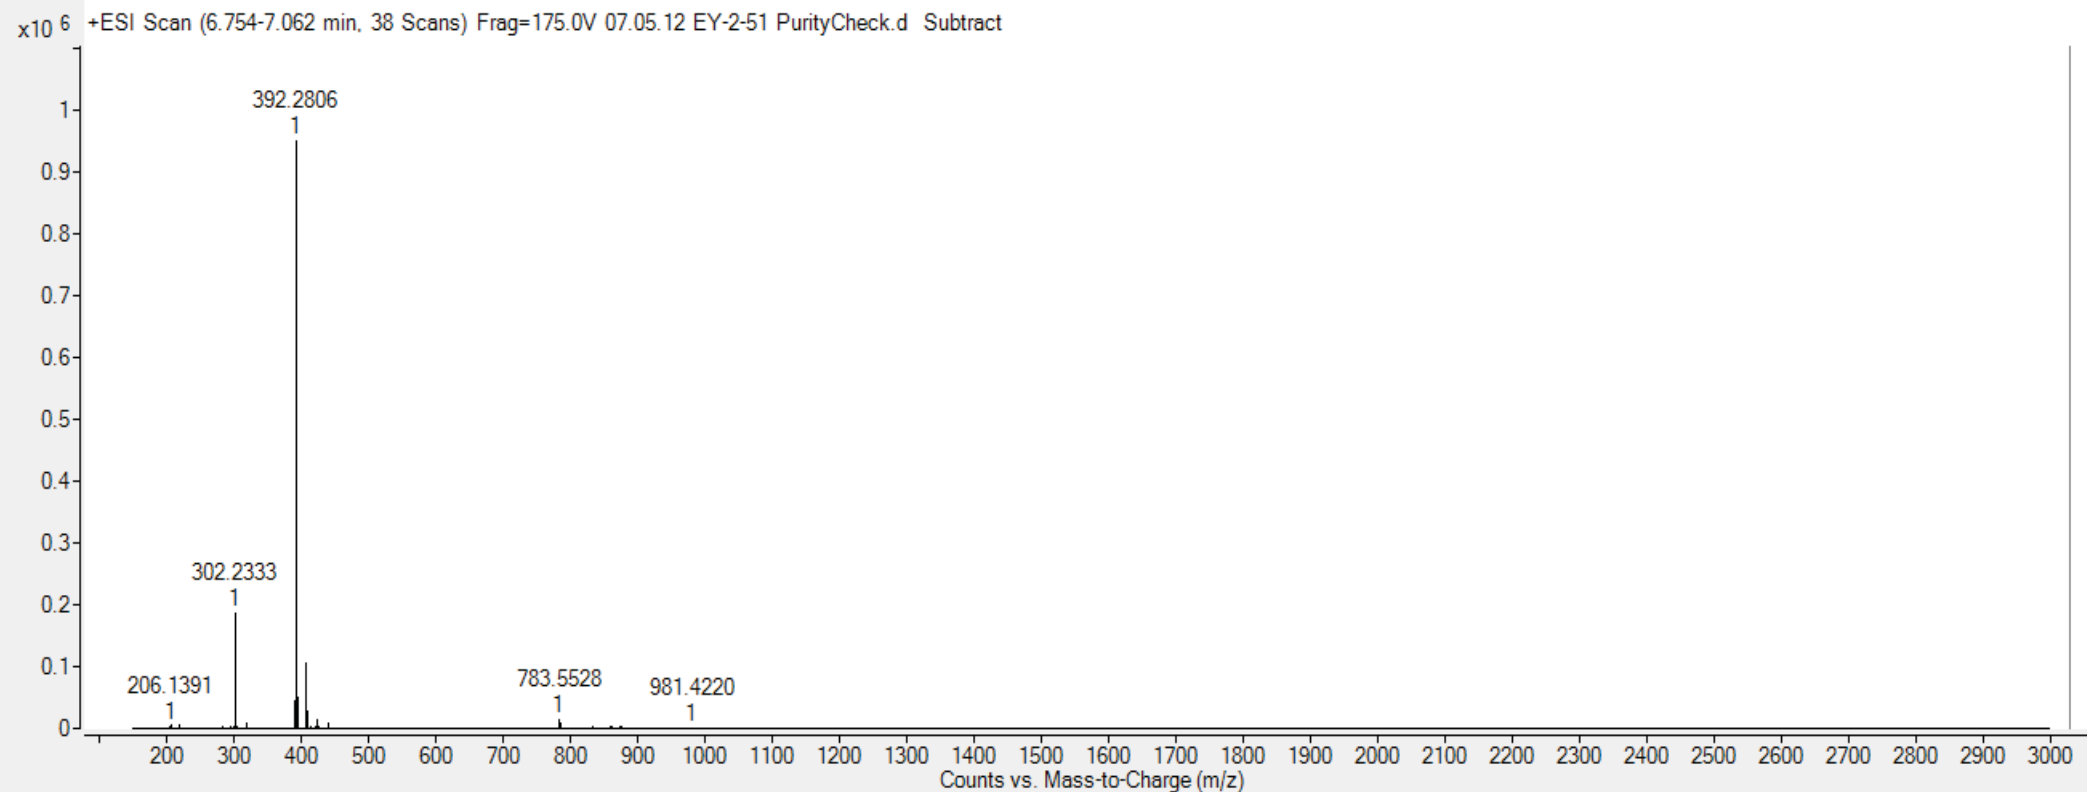



# 18e <sup>1</sup>H NMR

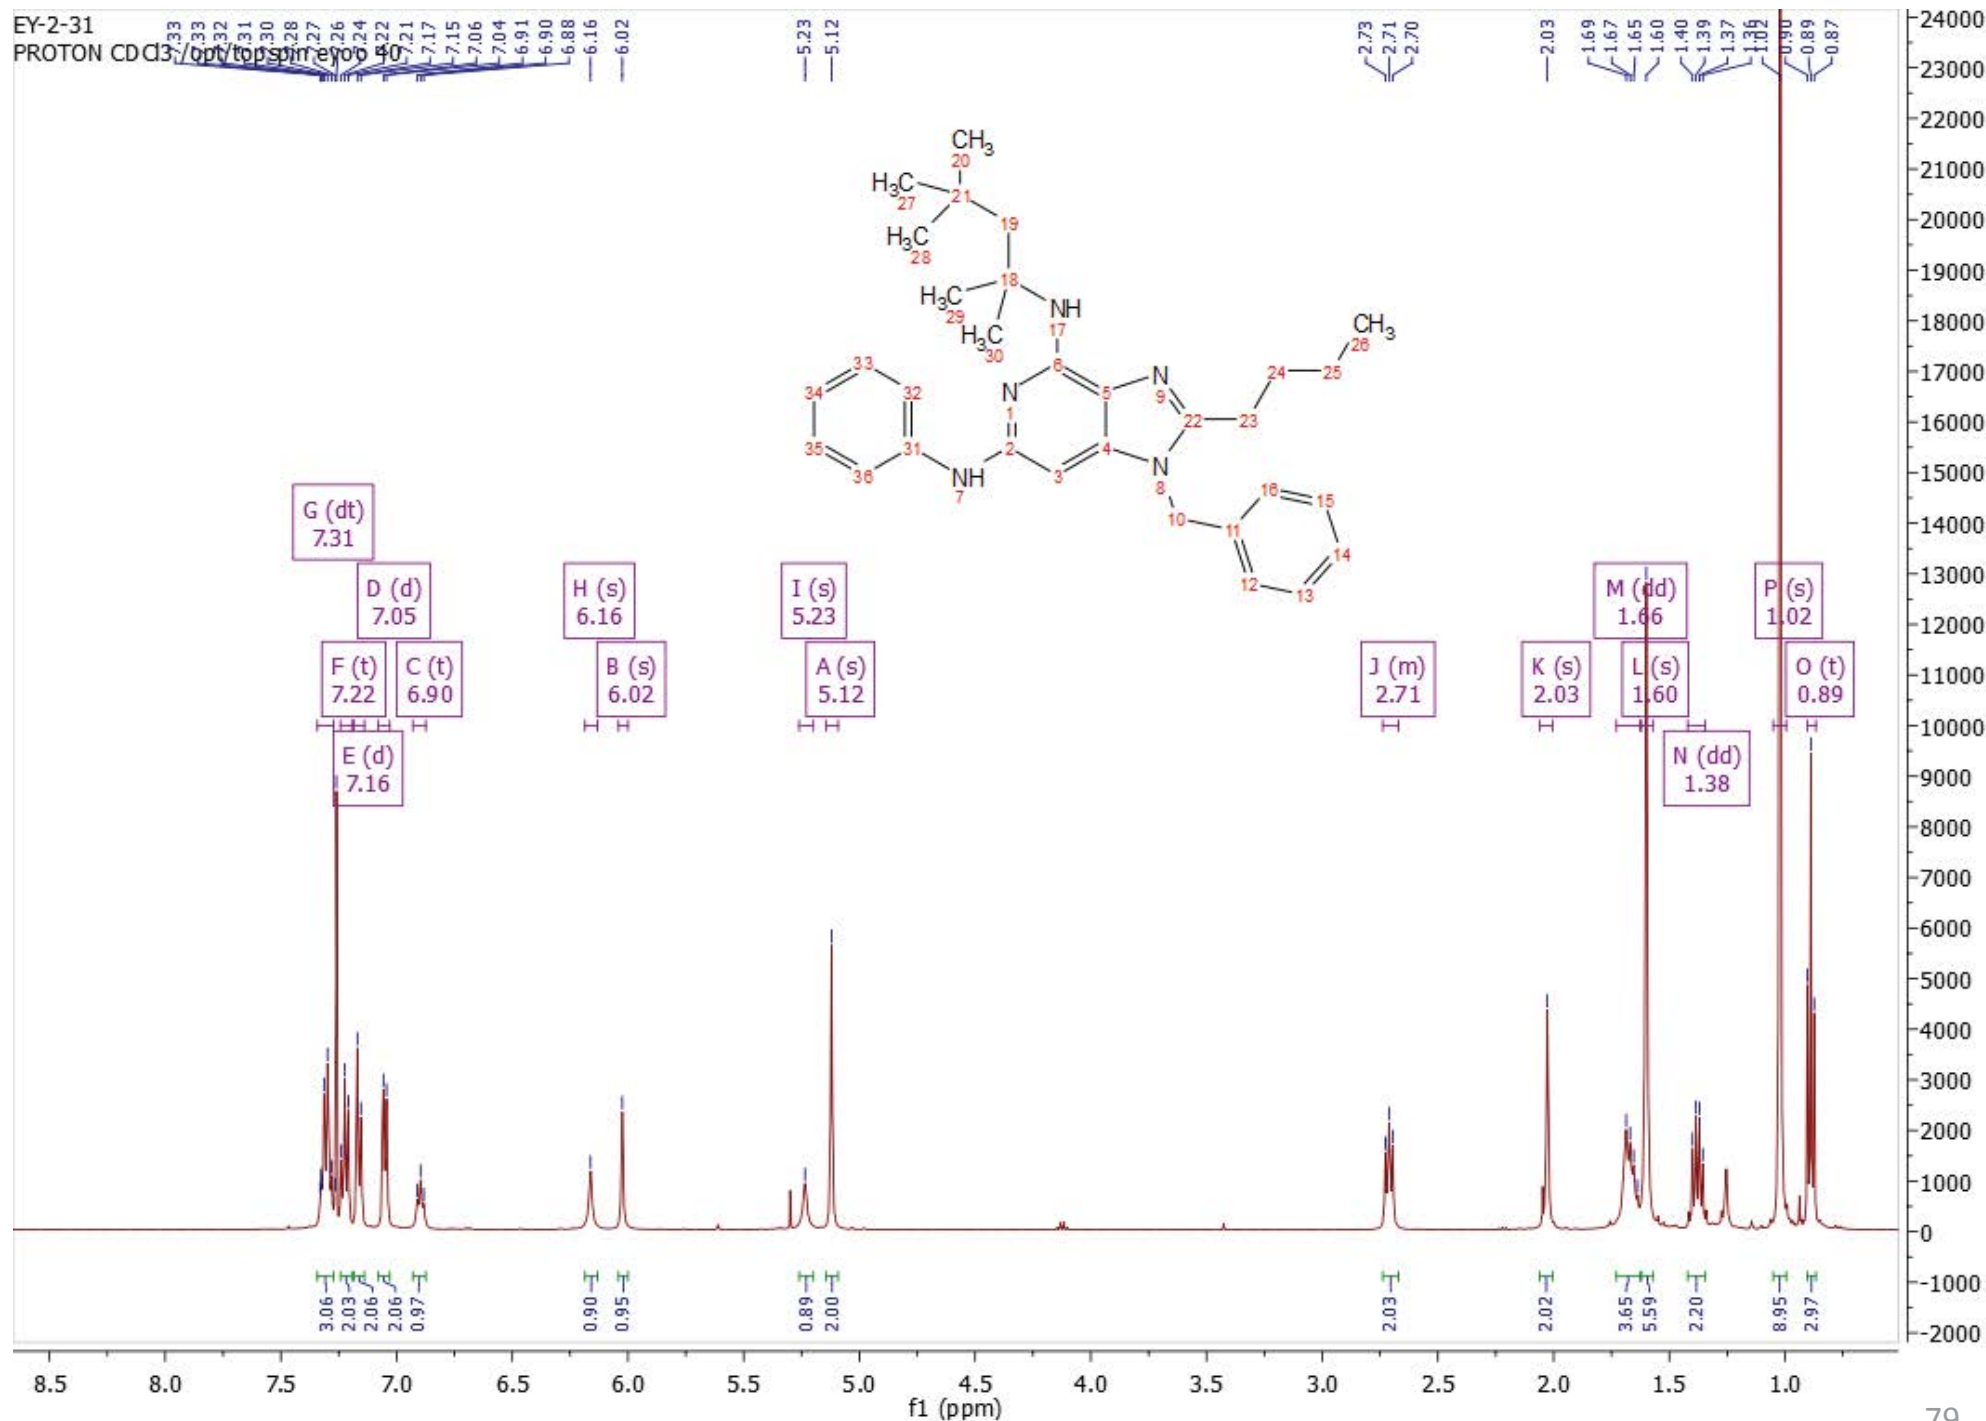

# 18e <sup>13</sup>C NMR

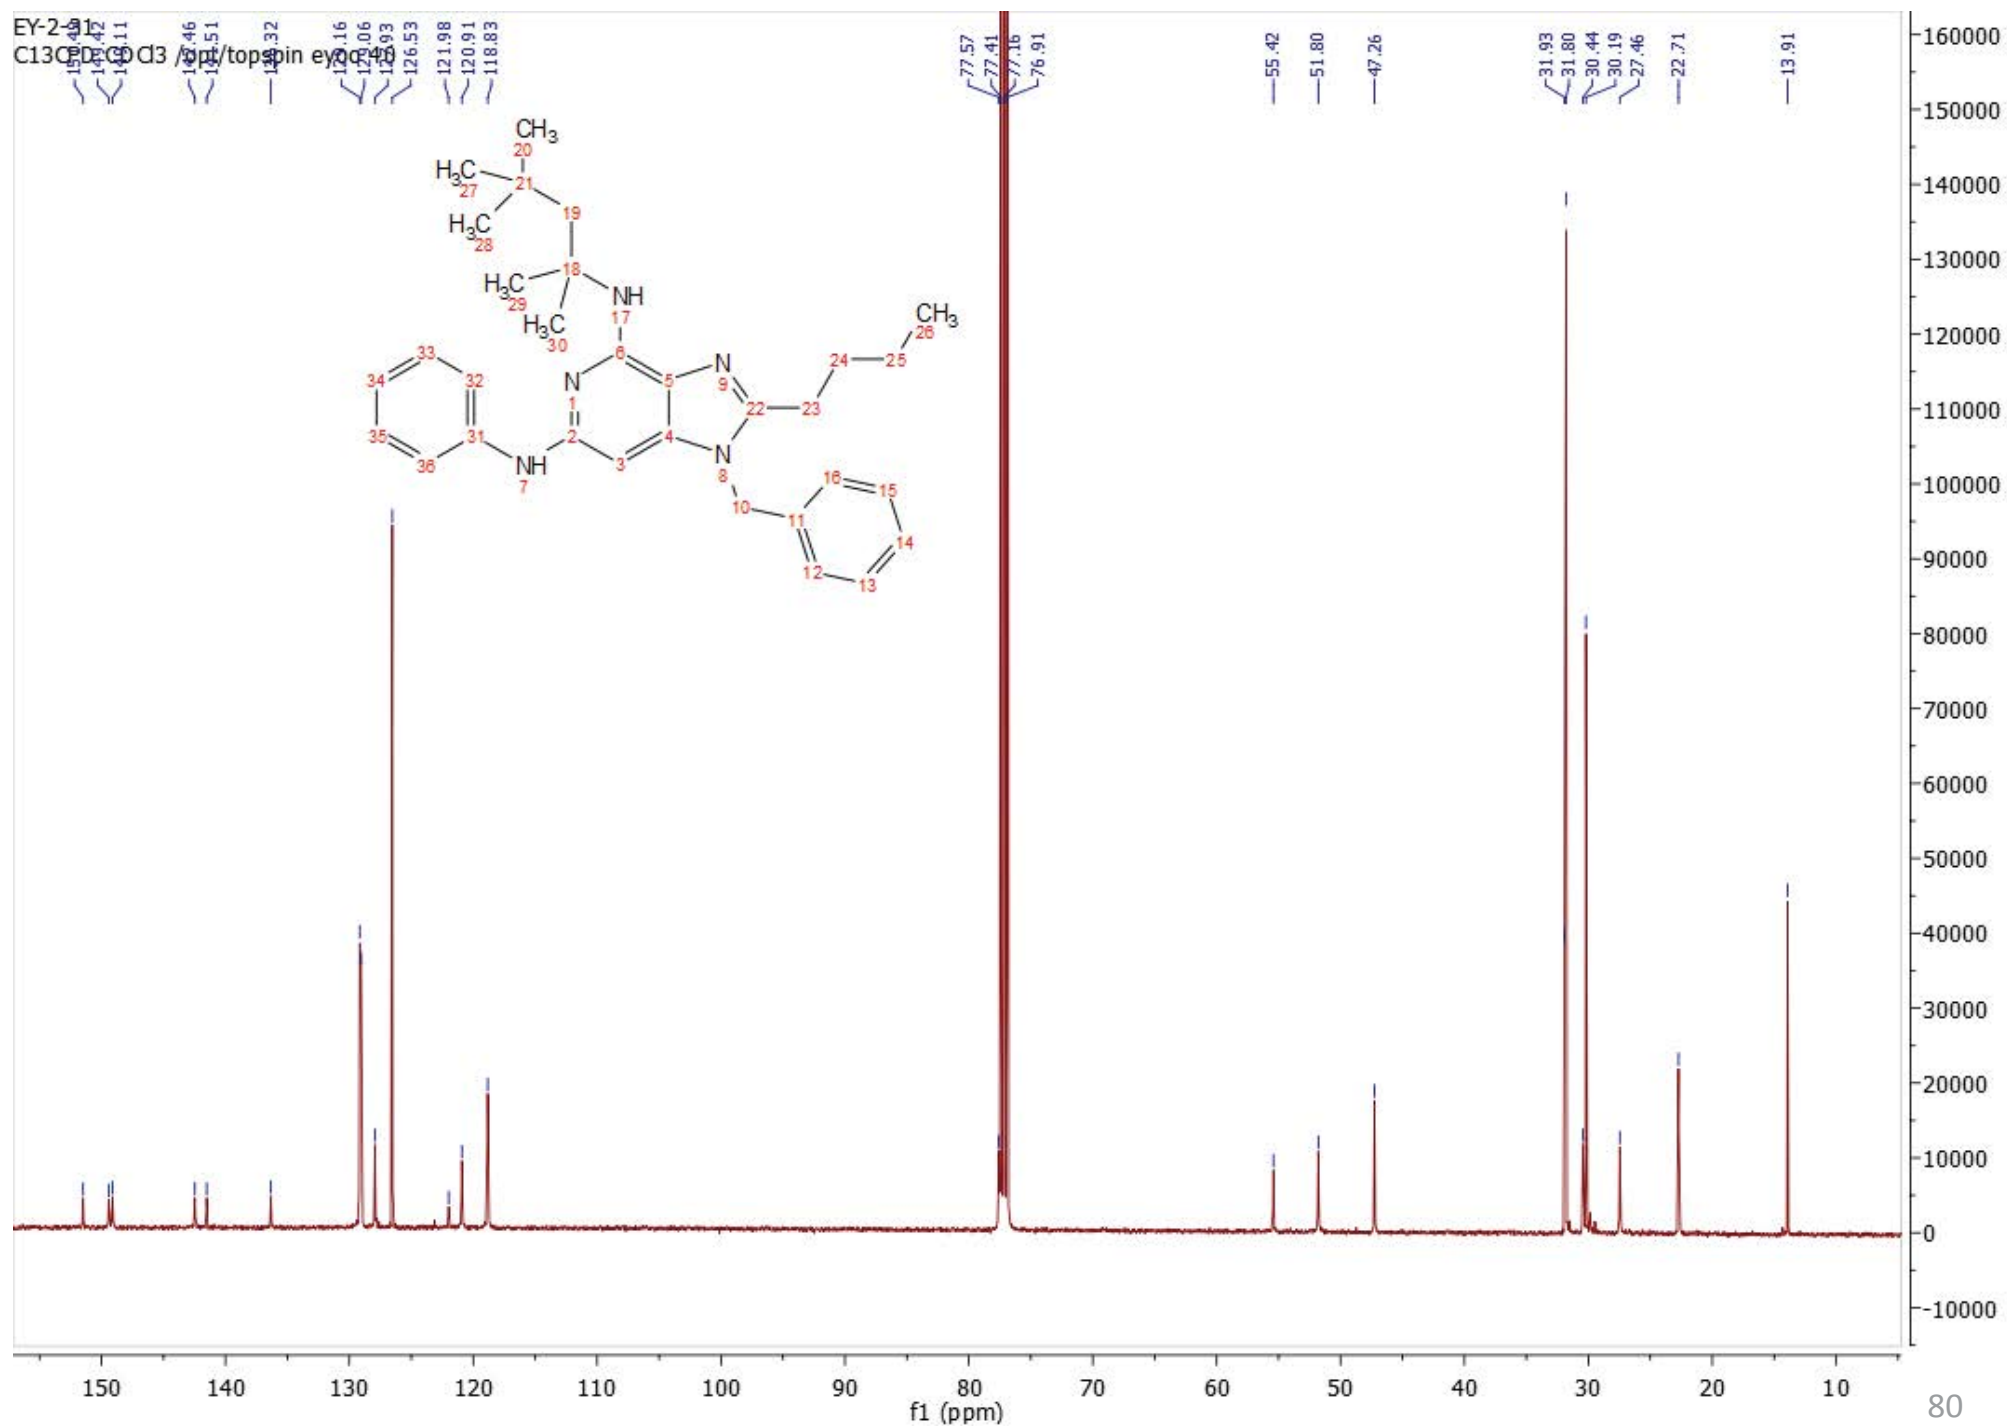



# 18e MS

|               |                      |             |                      |                 |              |                        |                      |
|---------------|----------------------|-------------|----------------------|-----------------|--------------|------------------------|----------------------|
| Sample Name   | 05.11.12 EY-2-31 tub | Position    | Vial 1               | Instrument Name | Instrument 1 | User Name              |                      |
| Inj Vol       | -1                   | InjPosition |                      | SampleType      | Sample       | IRM Calibration Status | Success              |
| Data Filename | 05.11.12 EY-2-31 tub | ACQ Method  | Water-ACN Infusion M | Comment         |              | Acquired Time          | 5/11/2012 5:04:53 PM |

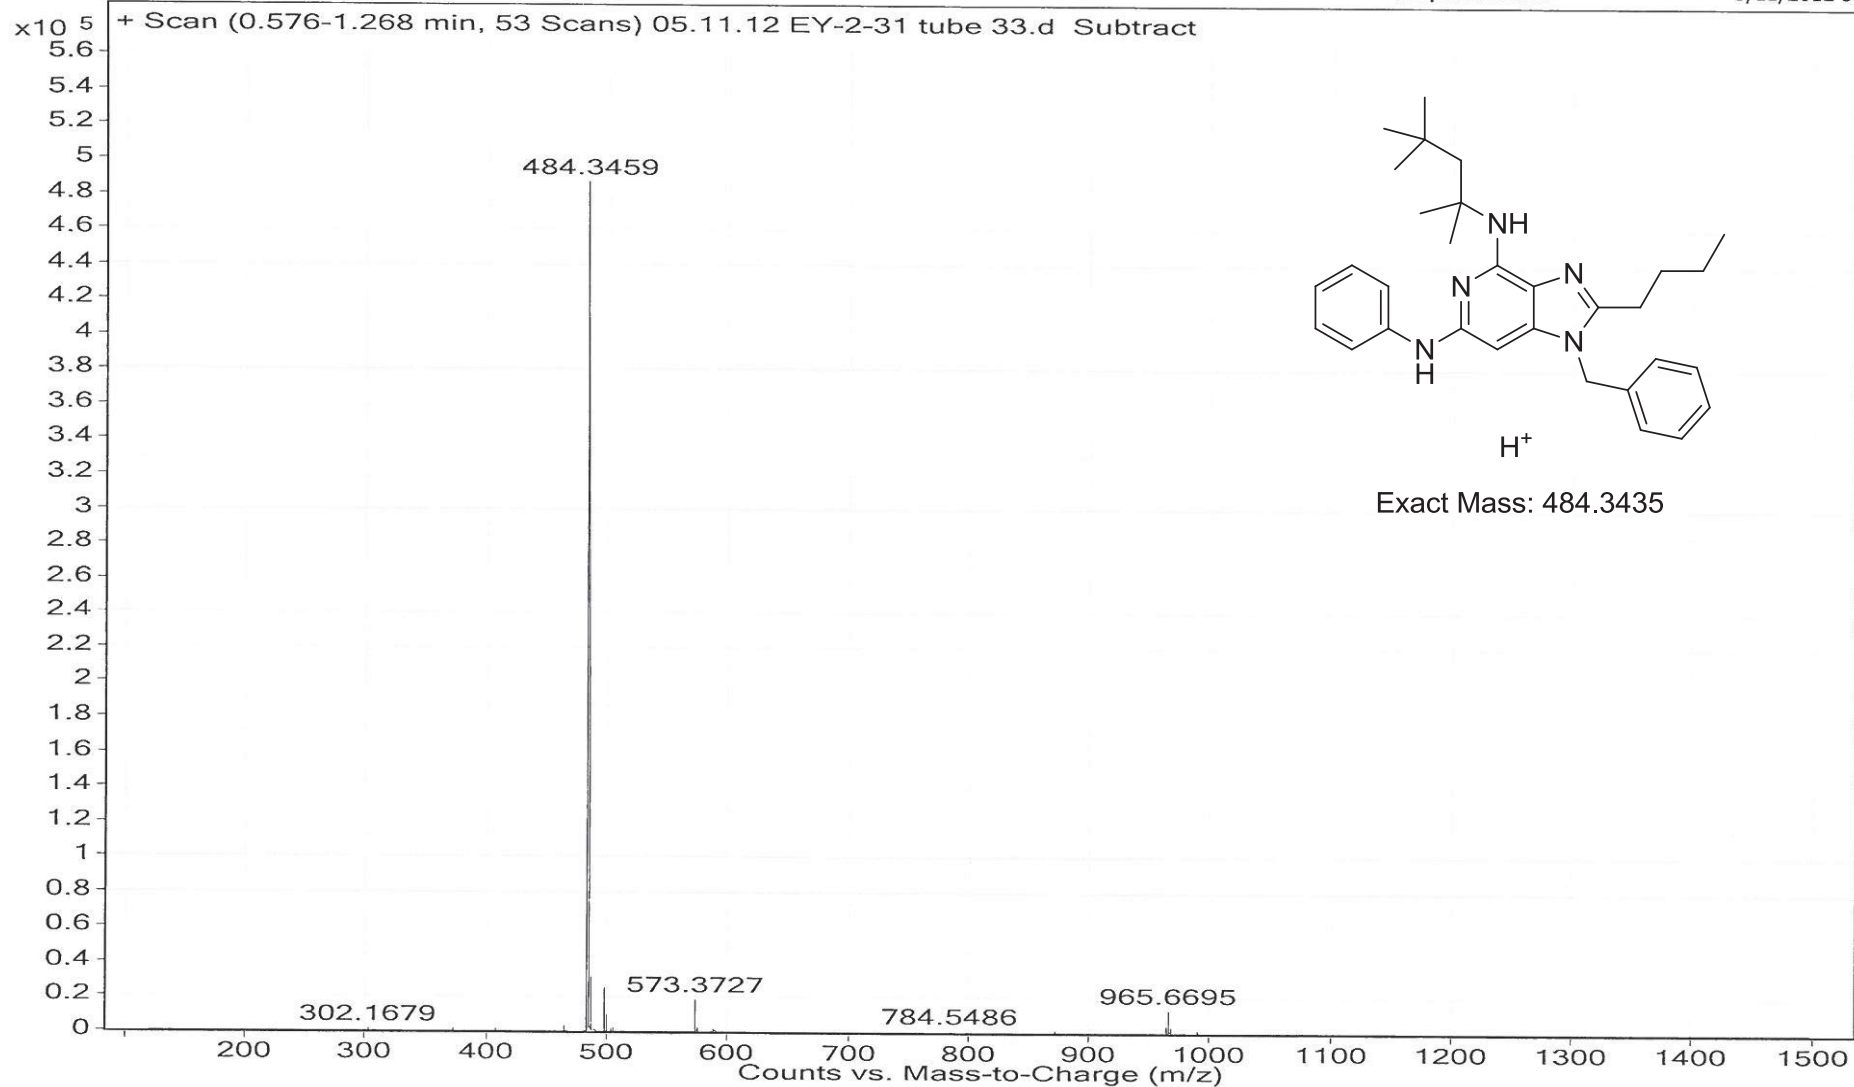

# 19e <sup>1</sup>H NMR

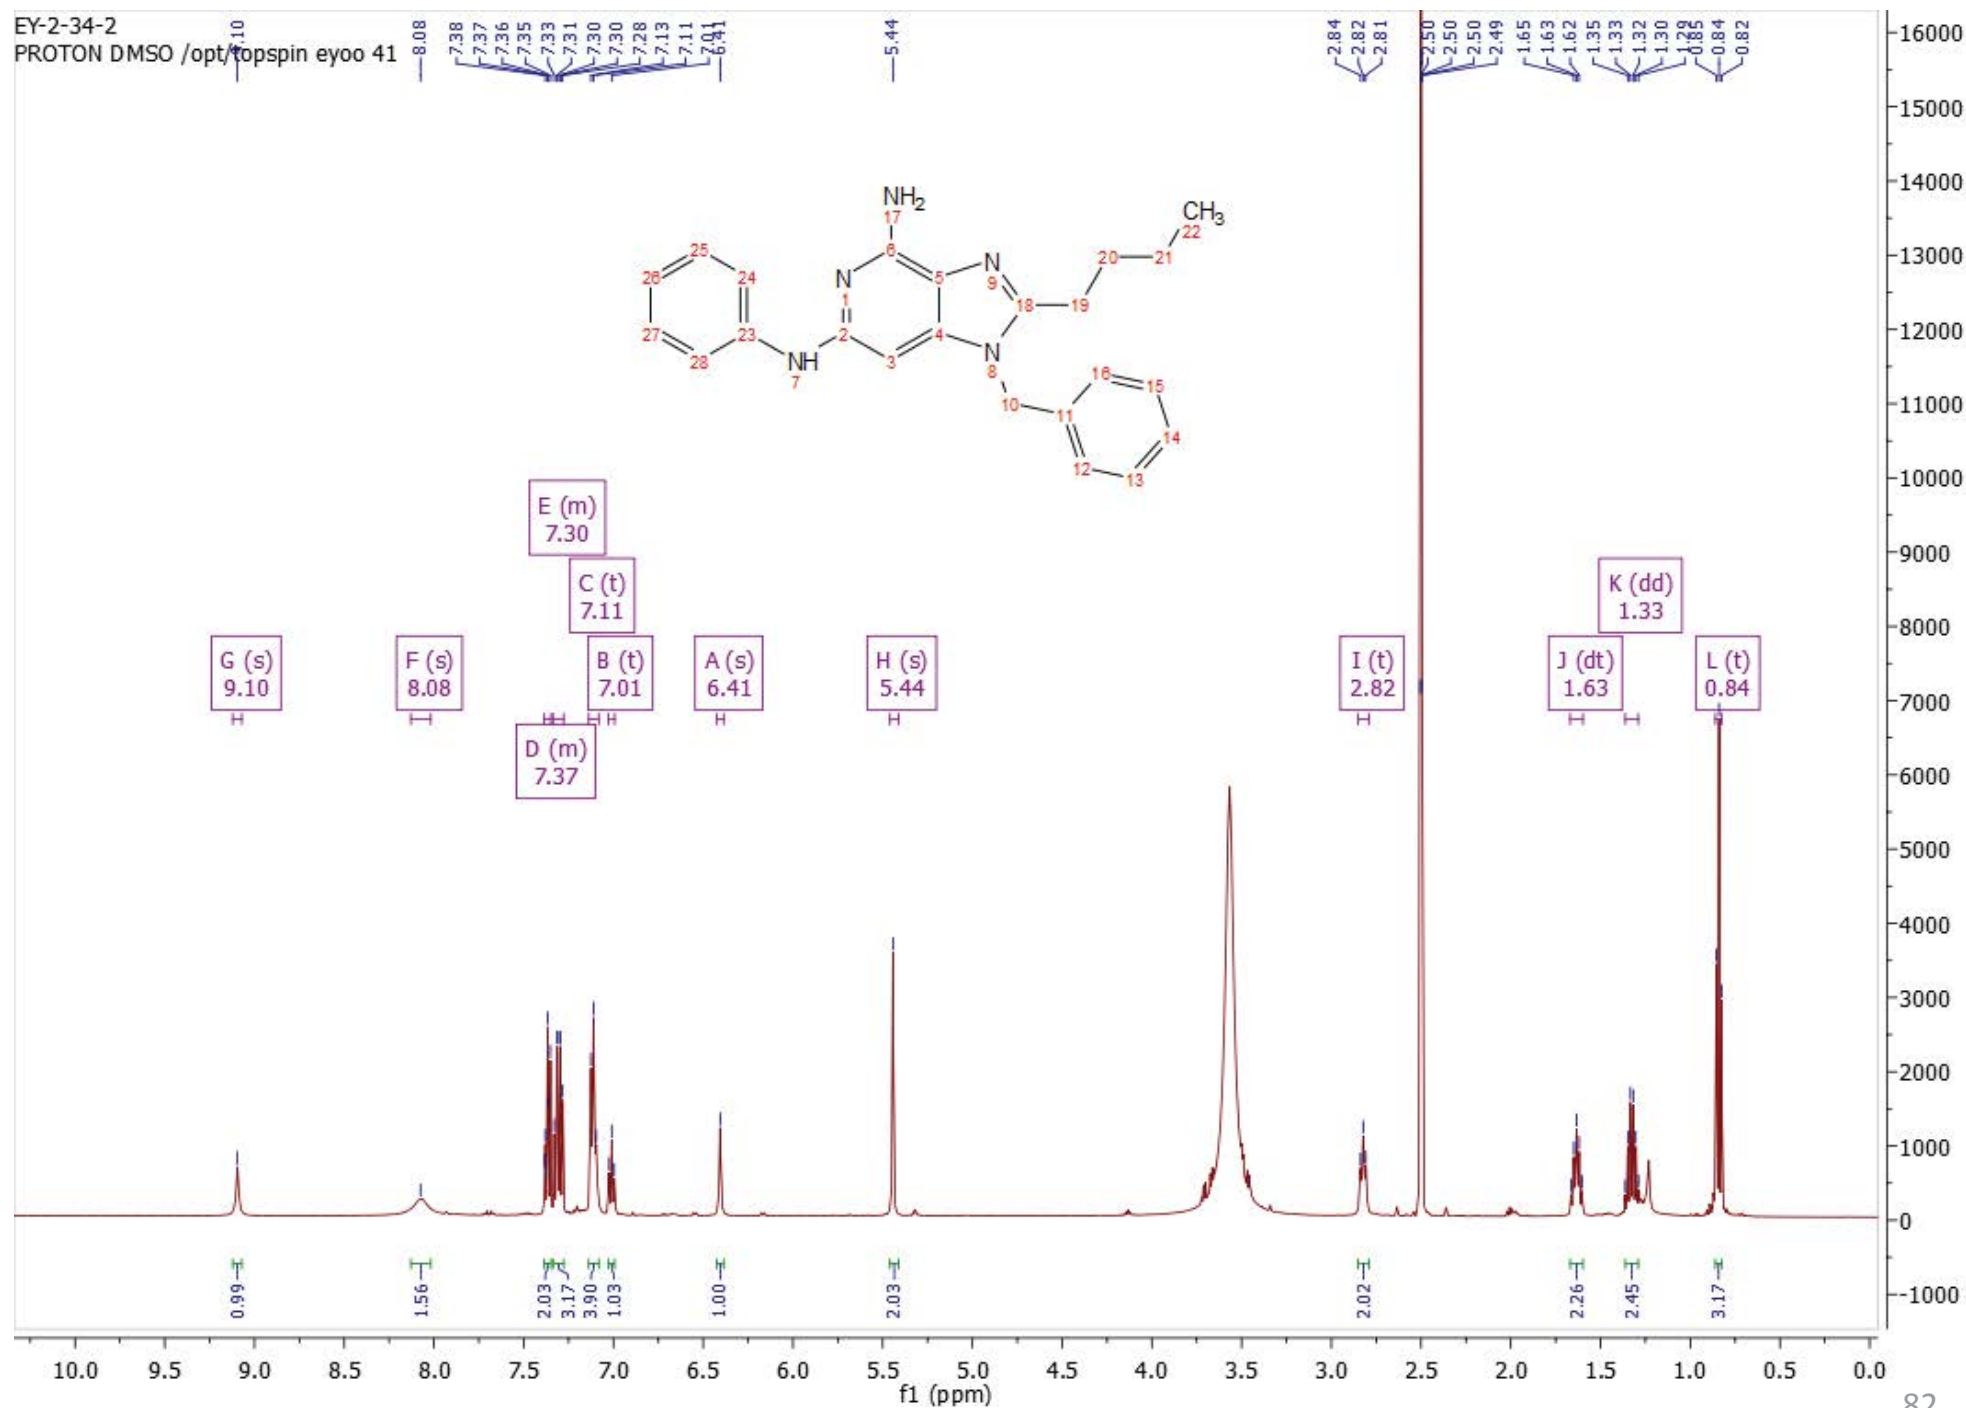

# 19e <sup>13</sup>C NMR

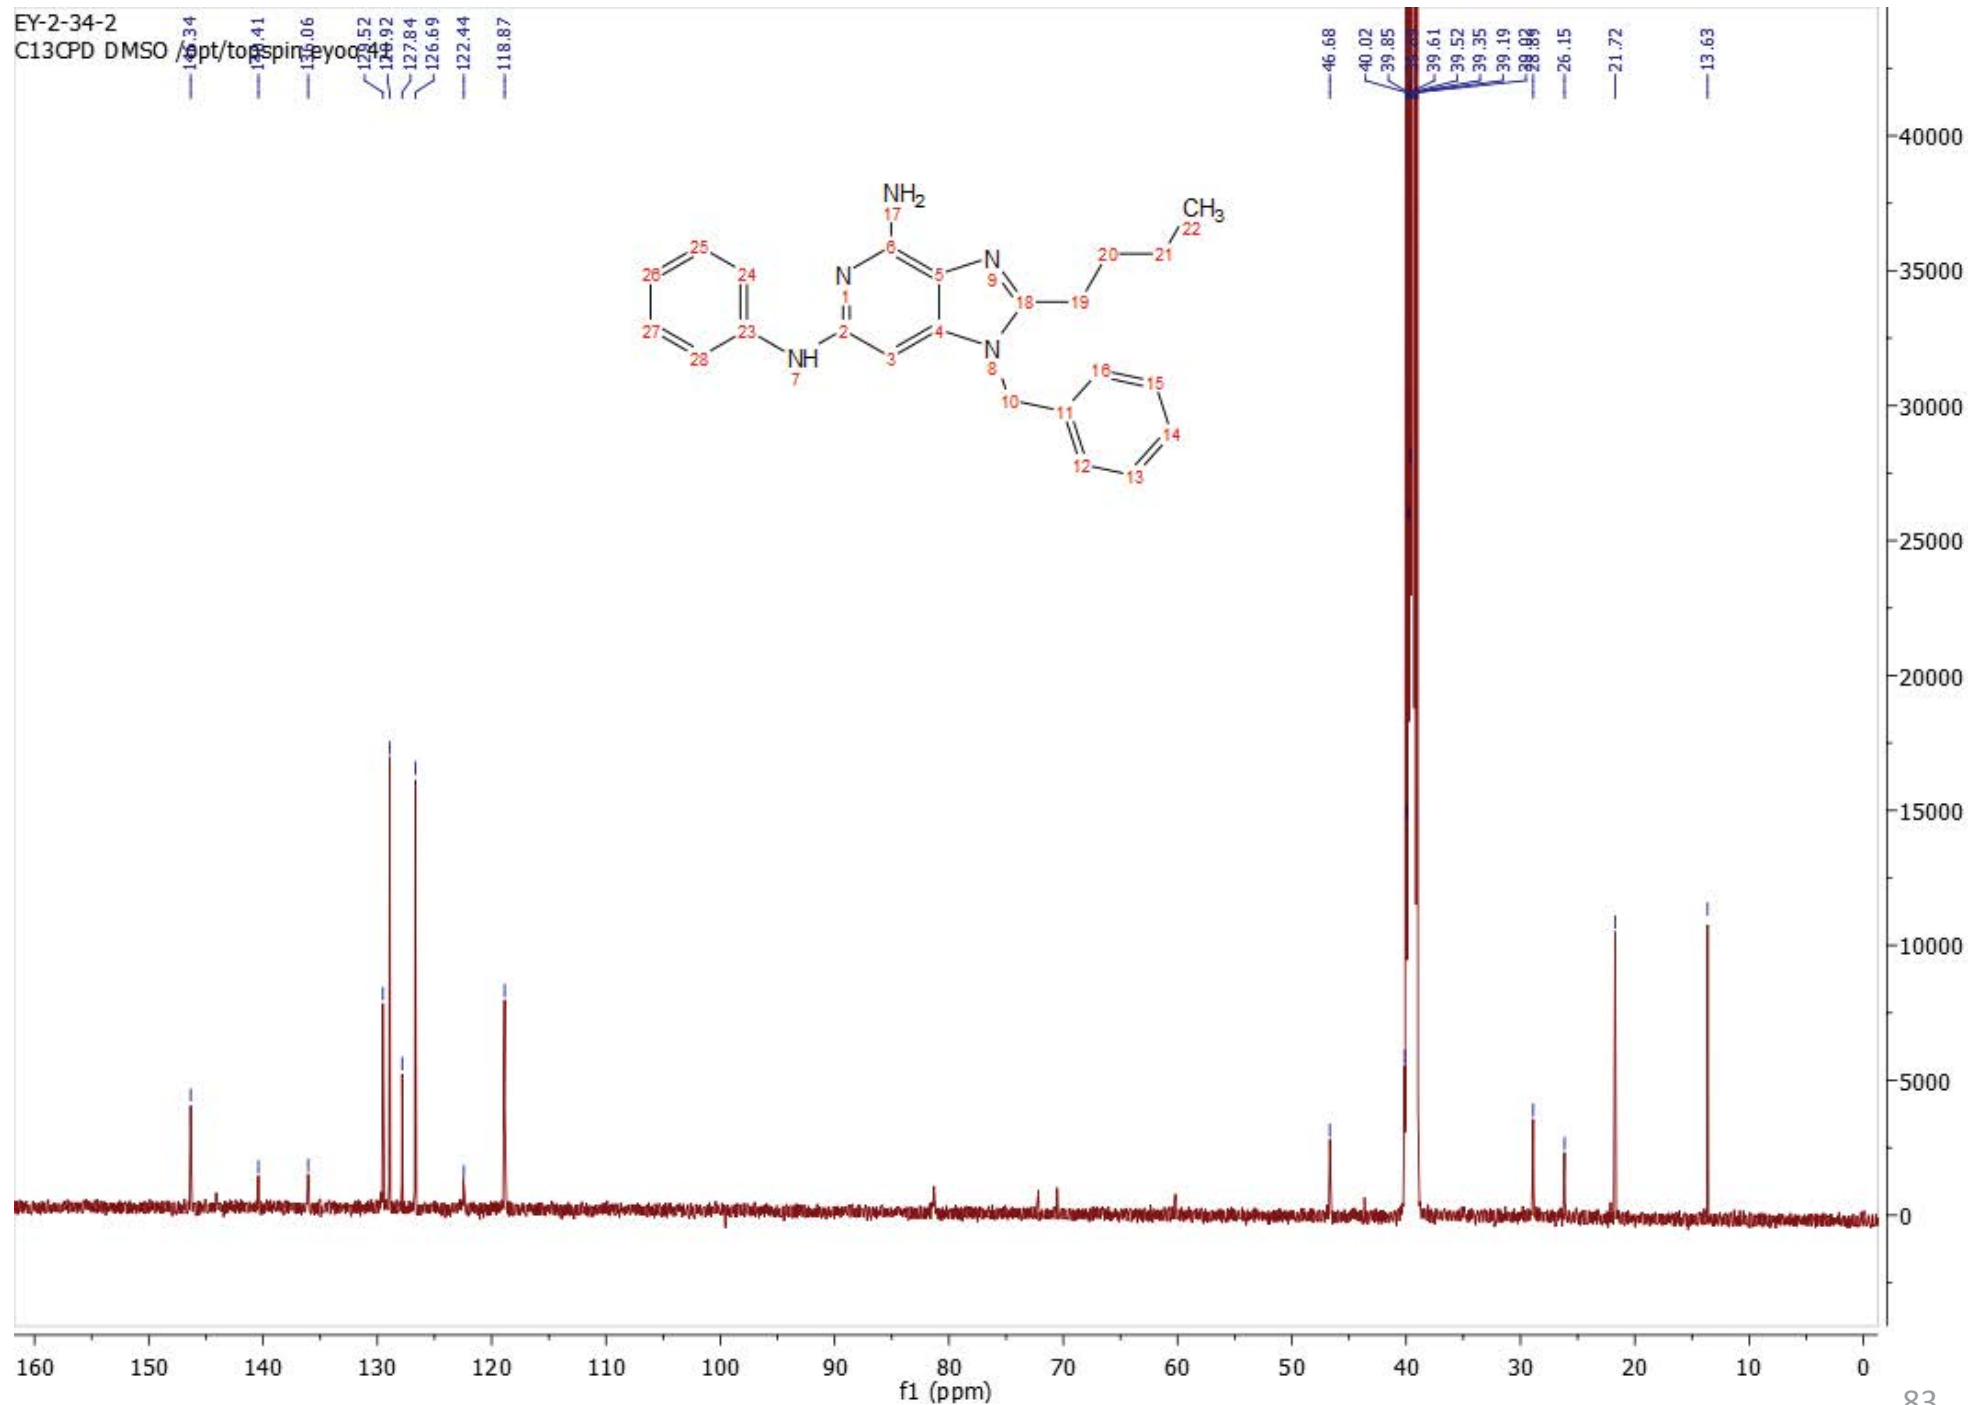

# 19e MS

|               |                    |             |                      |                 |              |                        |                       |
|---------------|--------------------|-------------|----------------------|-----------------|--------------|------------------------|-----------------------|
| Sample Name   | 05.14.12 EY-2-34   | Position    | Vial 1               | Instrument Name | Instrument 1 | User Name              |                       |
| Inj Vol       | -1                 | InjPosition |                      | SampleType      | Sample       | IRM Calibration Status | Success               |
| Data Filename | 05.14.12 EY-2-34.d | ACQ Method  | Water-ACN Infusion M | Comment         |              | Acquired Time          | 5/14/2012 10:56:32 AM |

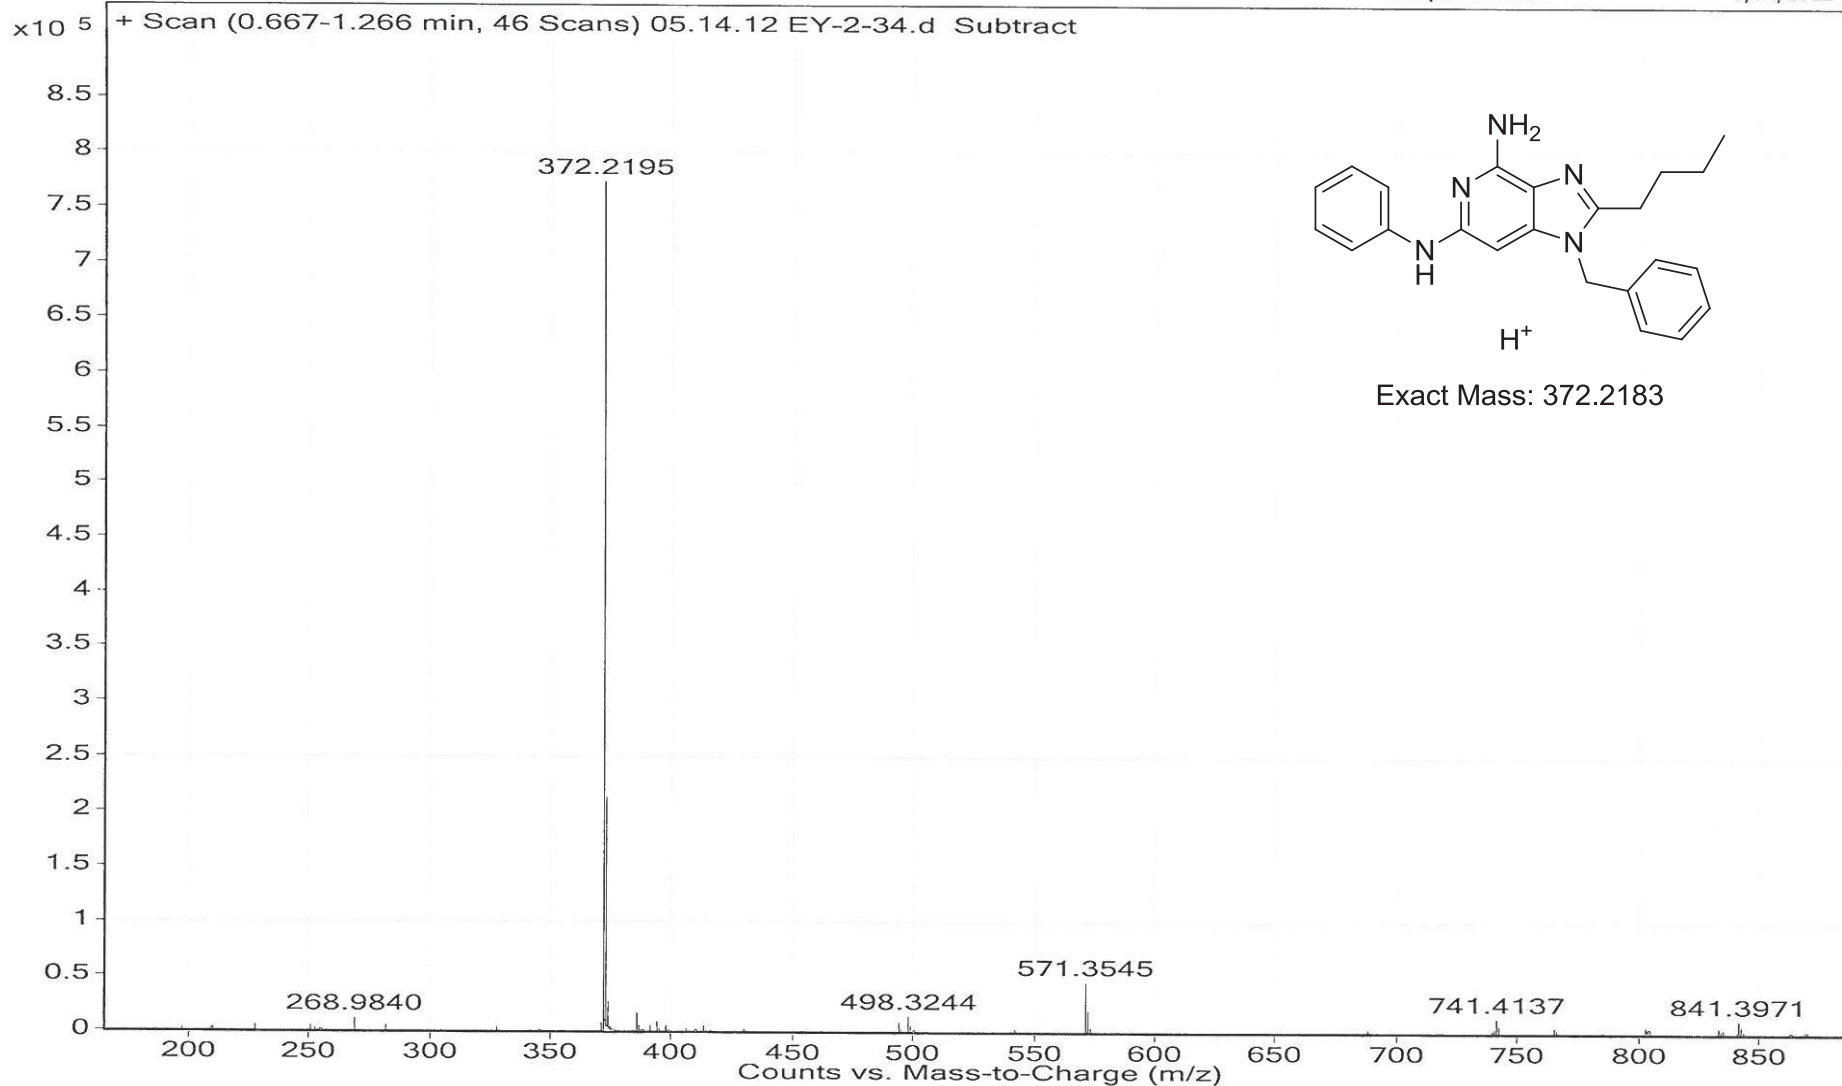

# 19e LC-MS

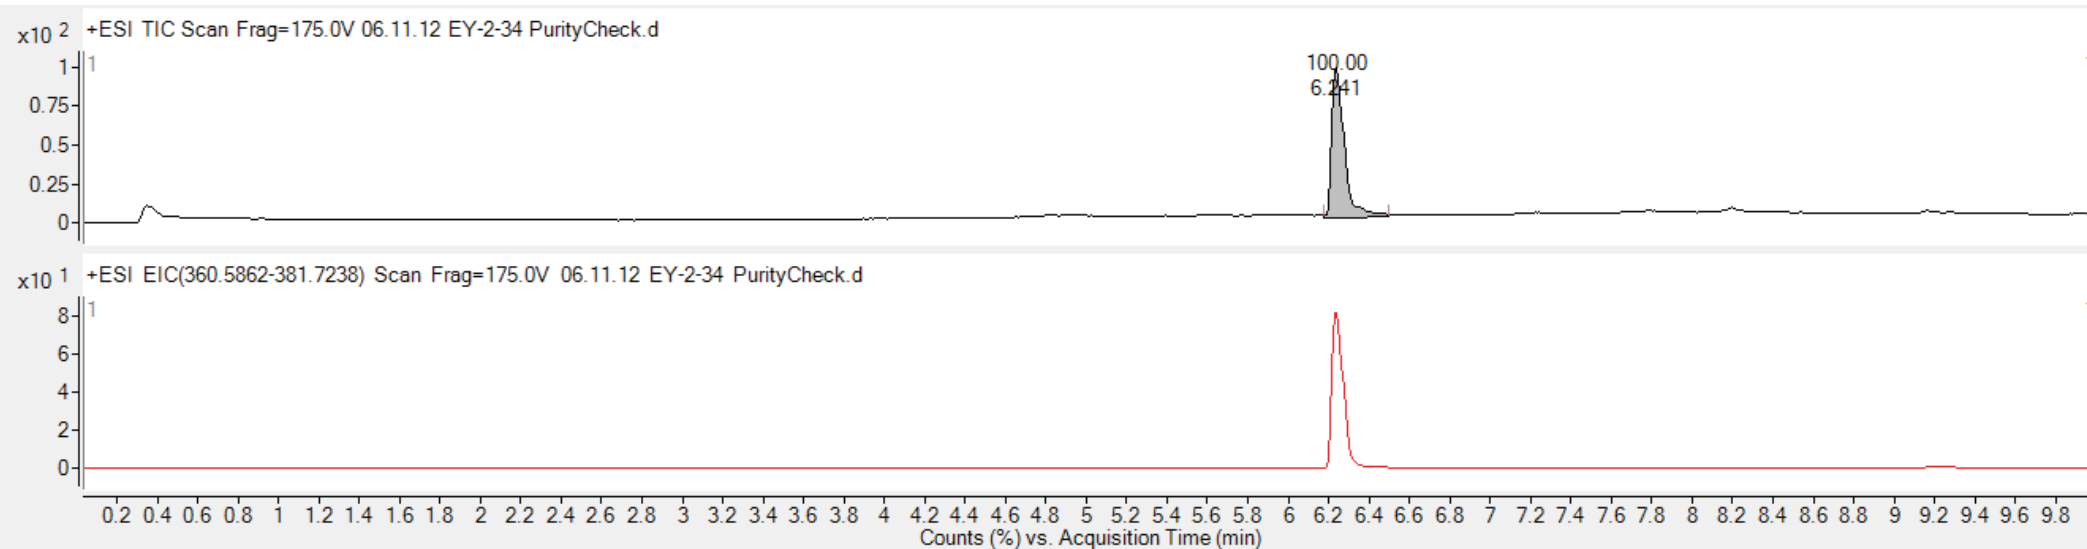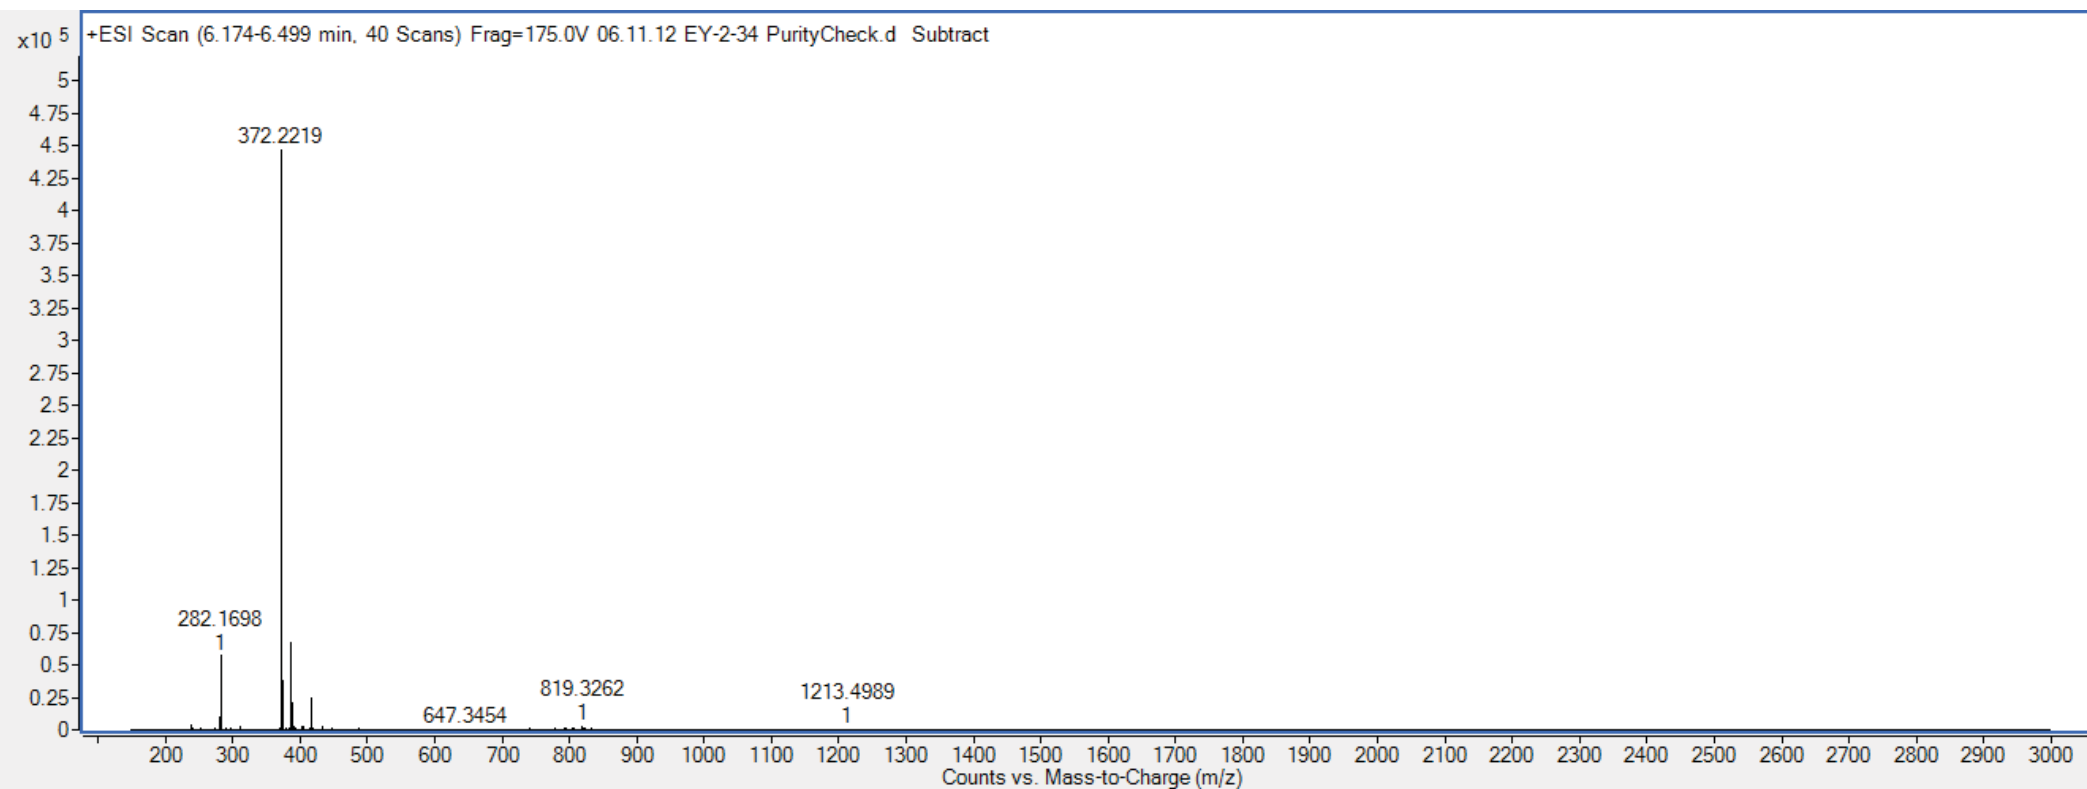

# 18f <sup>1</sup>H NMR

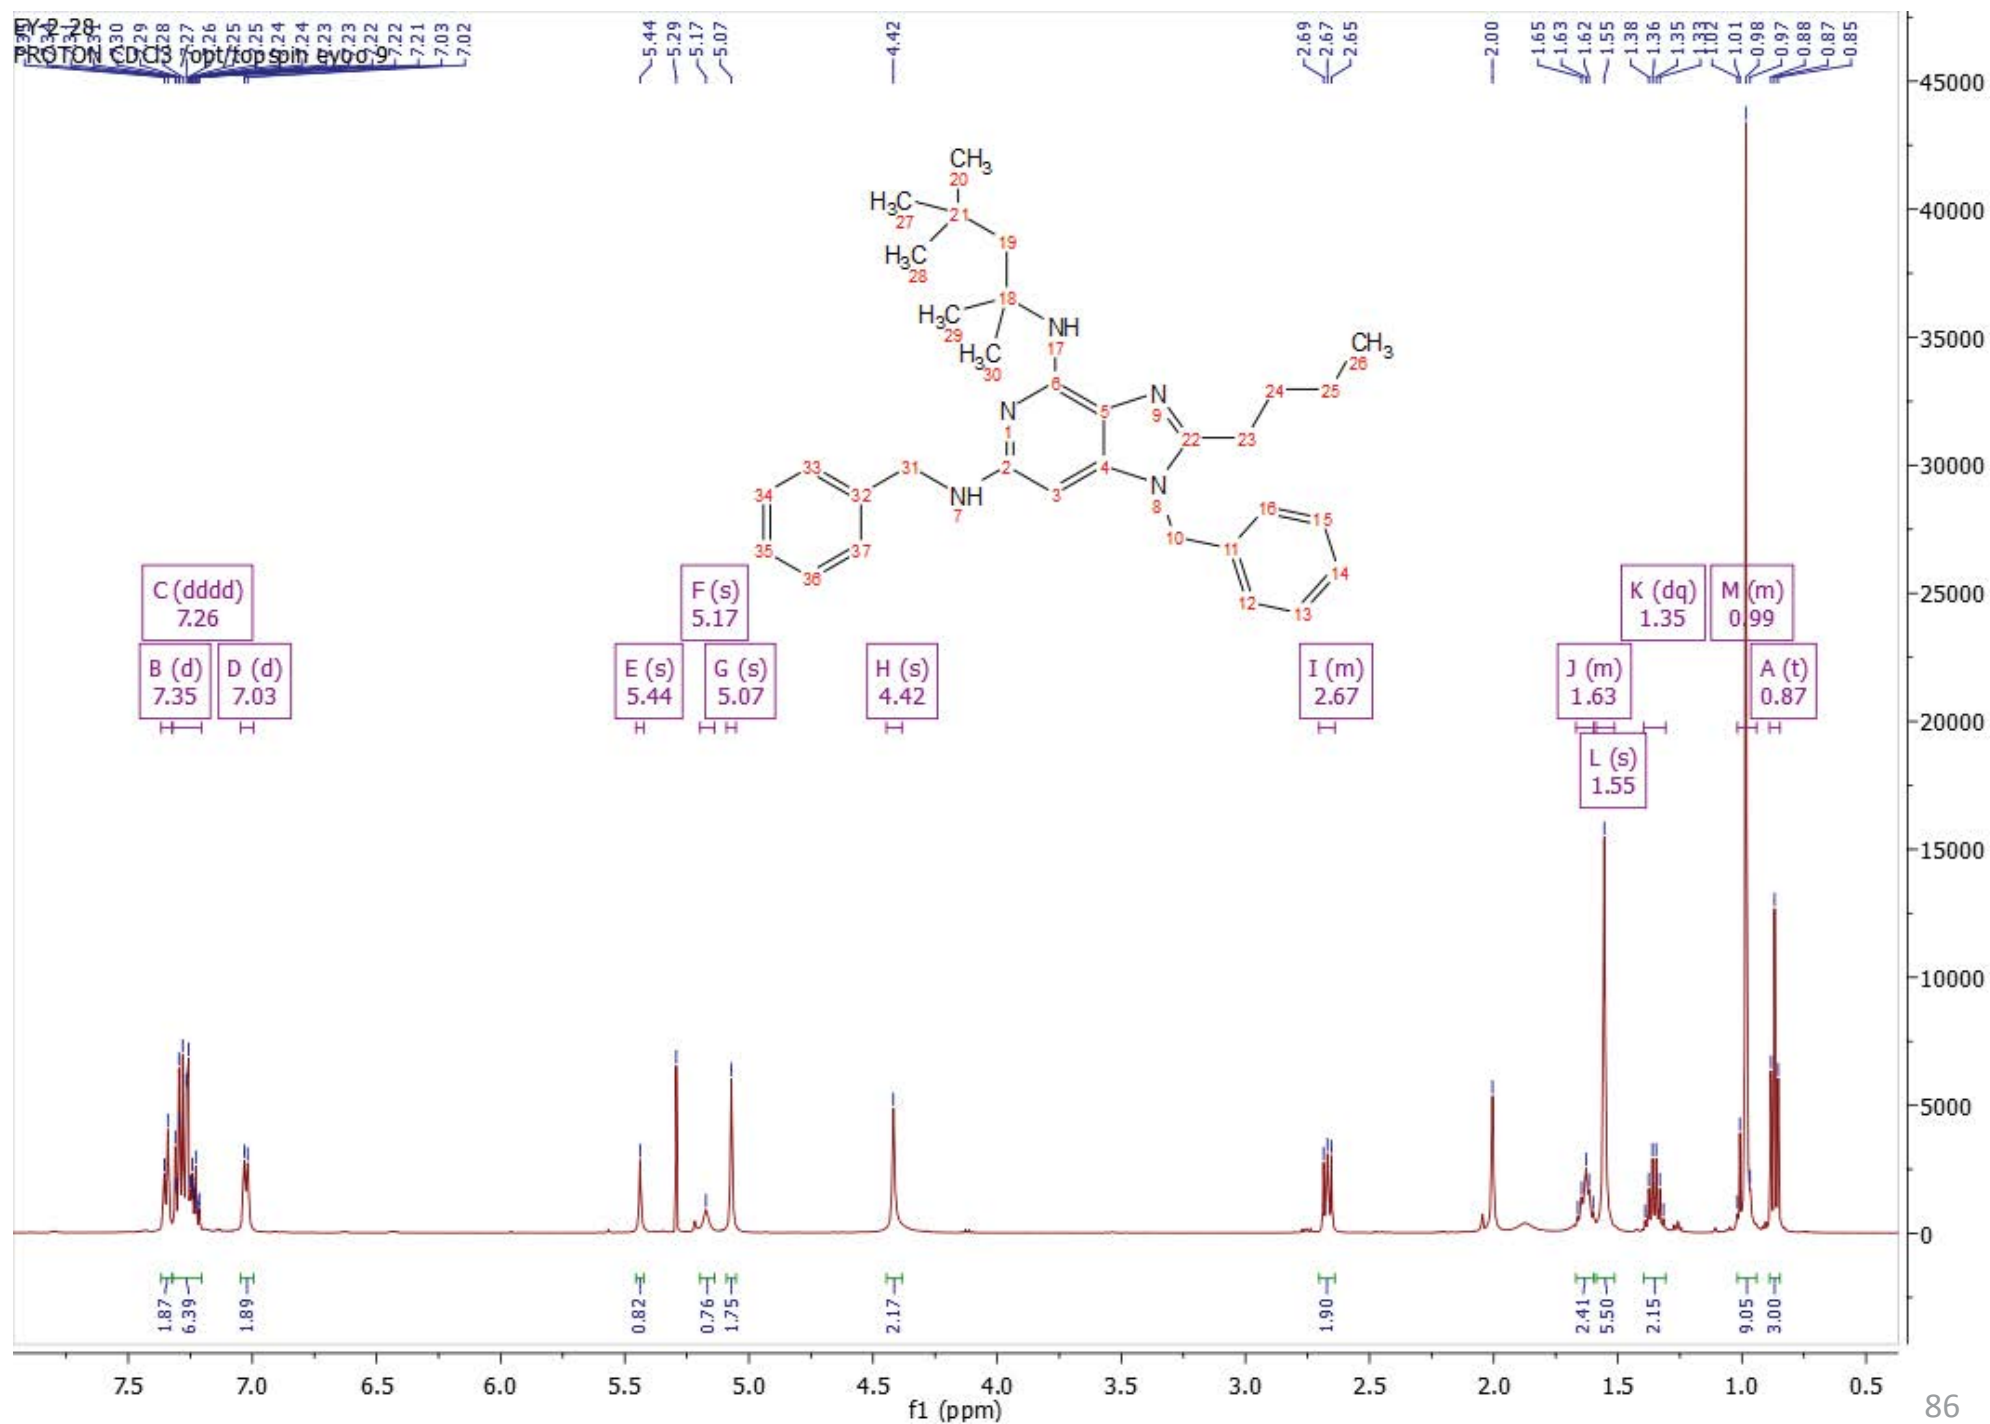

# **18f** <sup>13</sup>C NMR

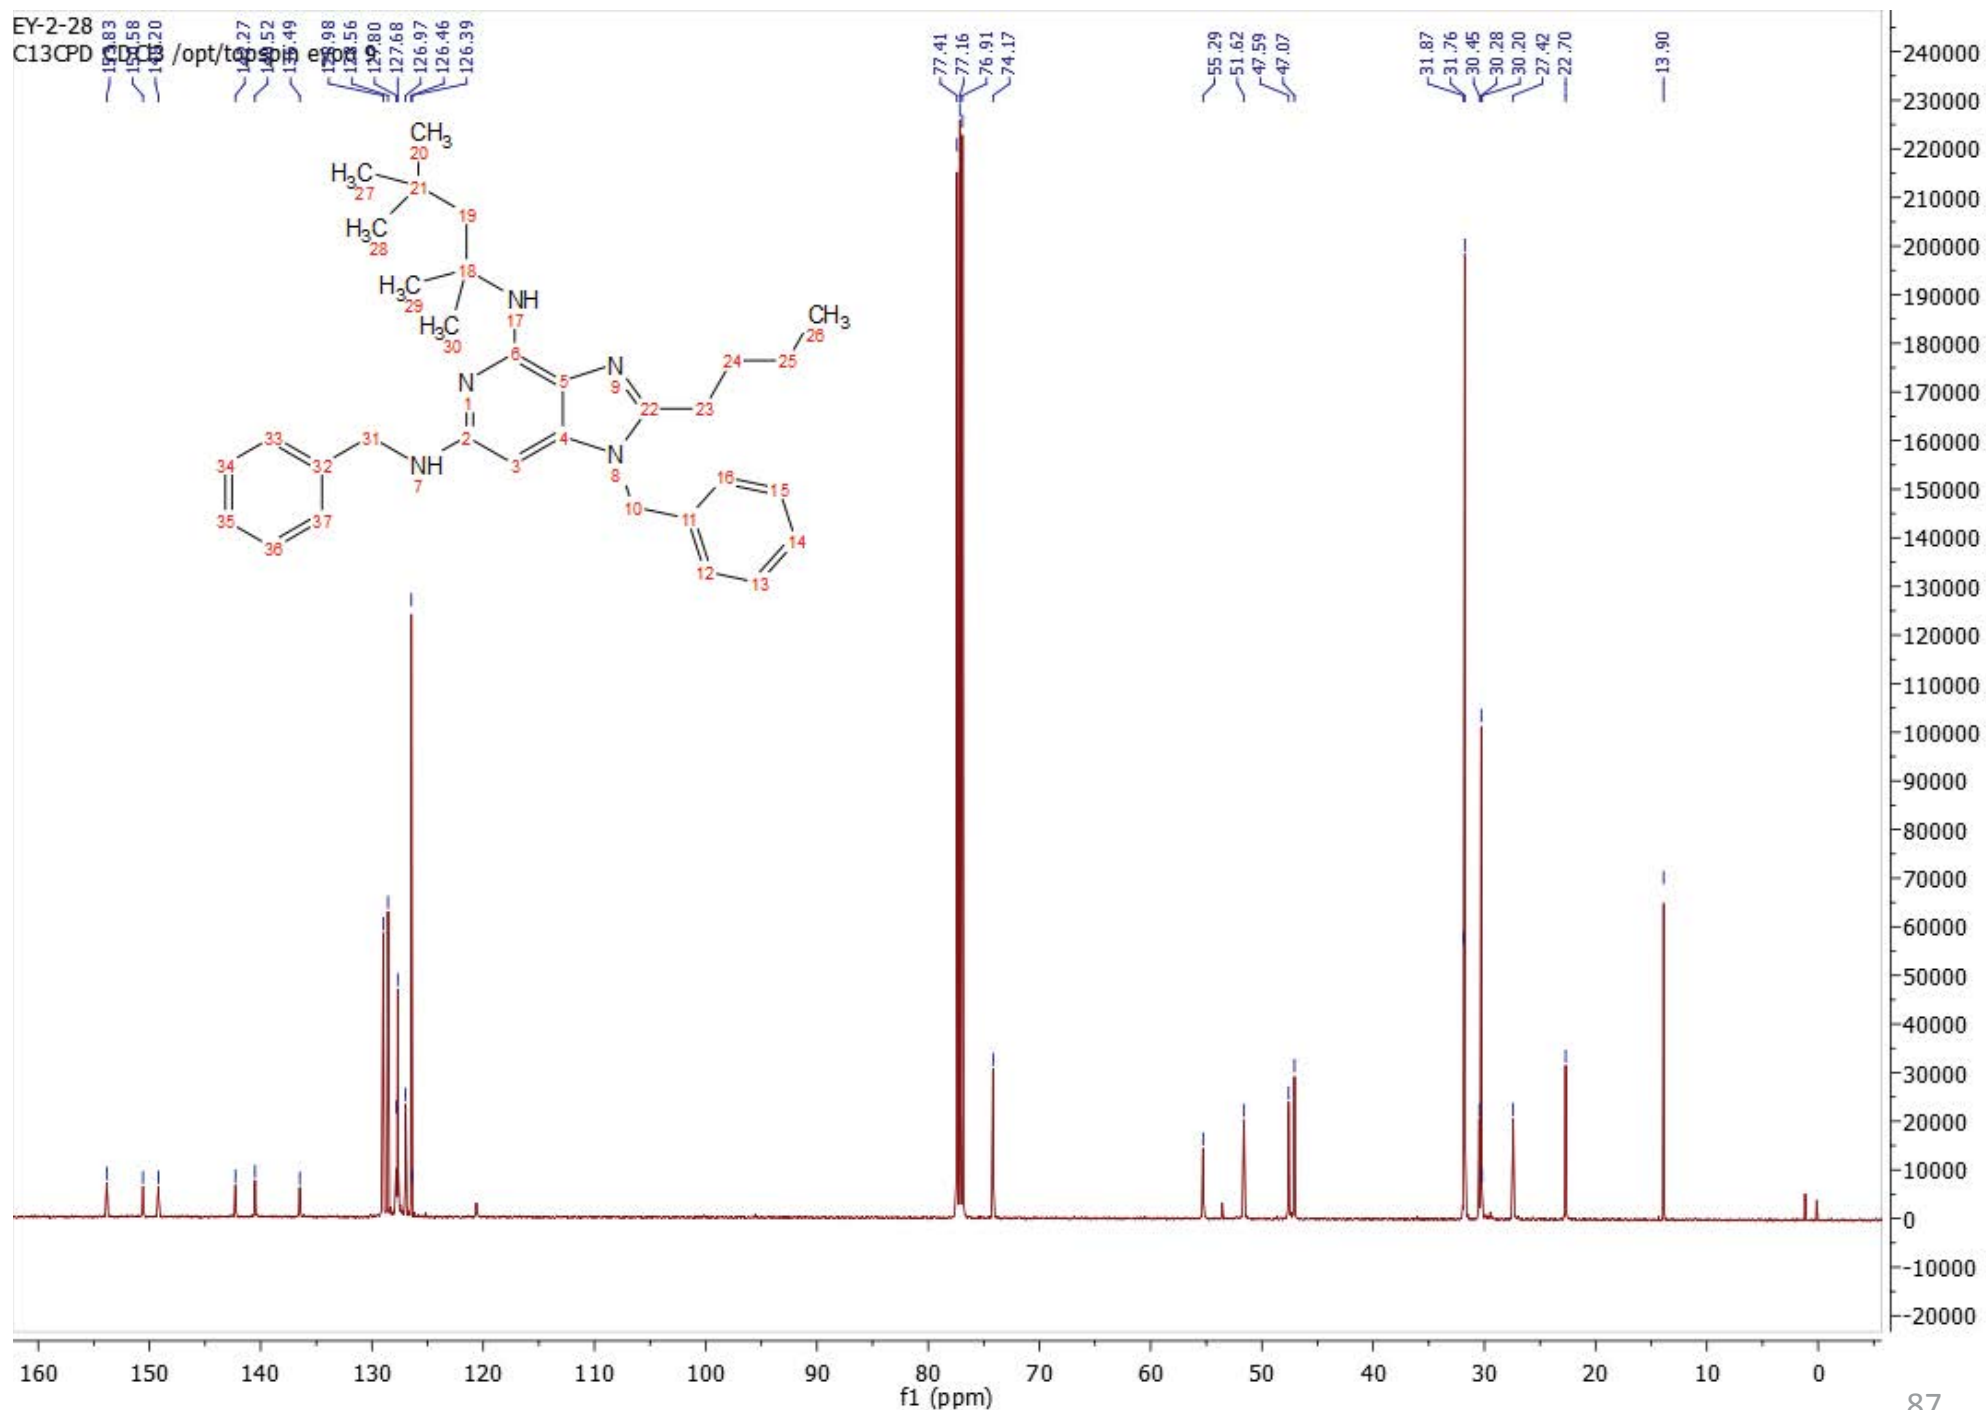



# 18f MS

|               |                    |             |                      |                 |              |                        |                      |
|---------------|--------------------|-------------|----------------------|-----------------|--------------|------------------------|----------------------|
| Sample Name   | 05.09.12 EY-2-28   | Position    | Vial 1               | Instrument Name | Instrument 1 | User Name              |                      |
| Inj Vol       | -1                 | InjPosition |                      | SampleType      | Sample       | IRM Calibration Status | Success              |
| Data Filename | 05.09.12 EY-2-28.d | ACQ Method  | Water-ACN Infusion M | Comment         |              | Acquired Time          | 5/9/2012 11:40:07 AM |

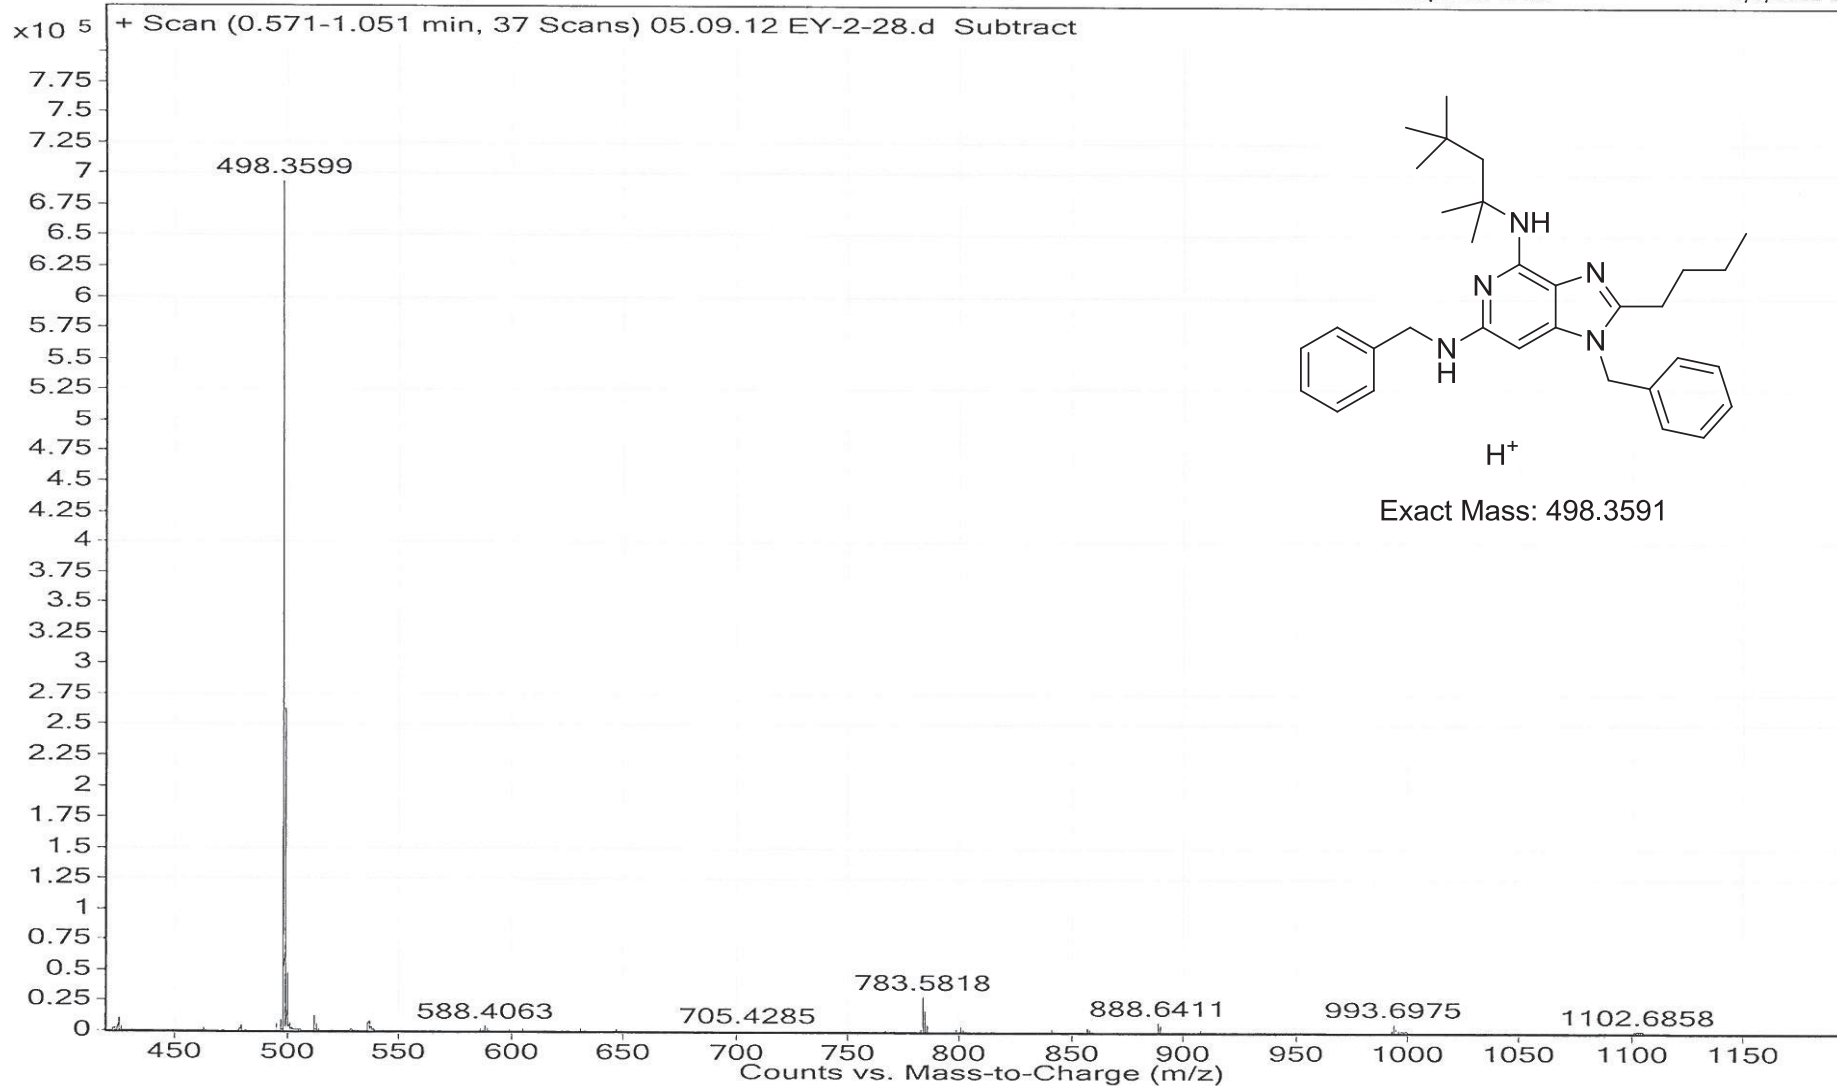



# 19f <sup>1</sup>H NMR

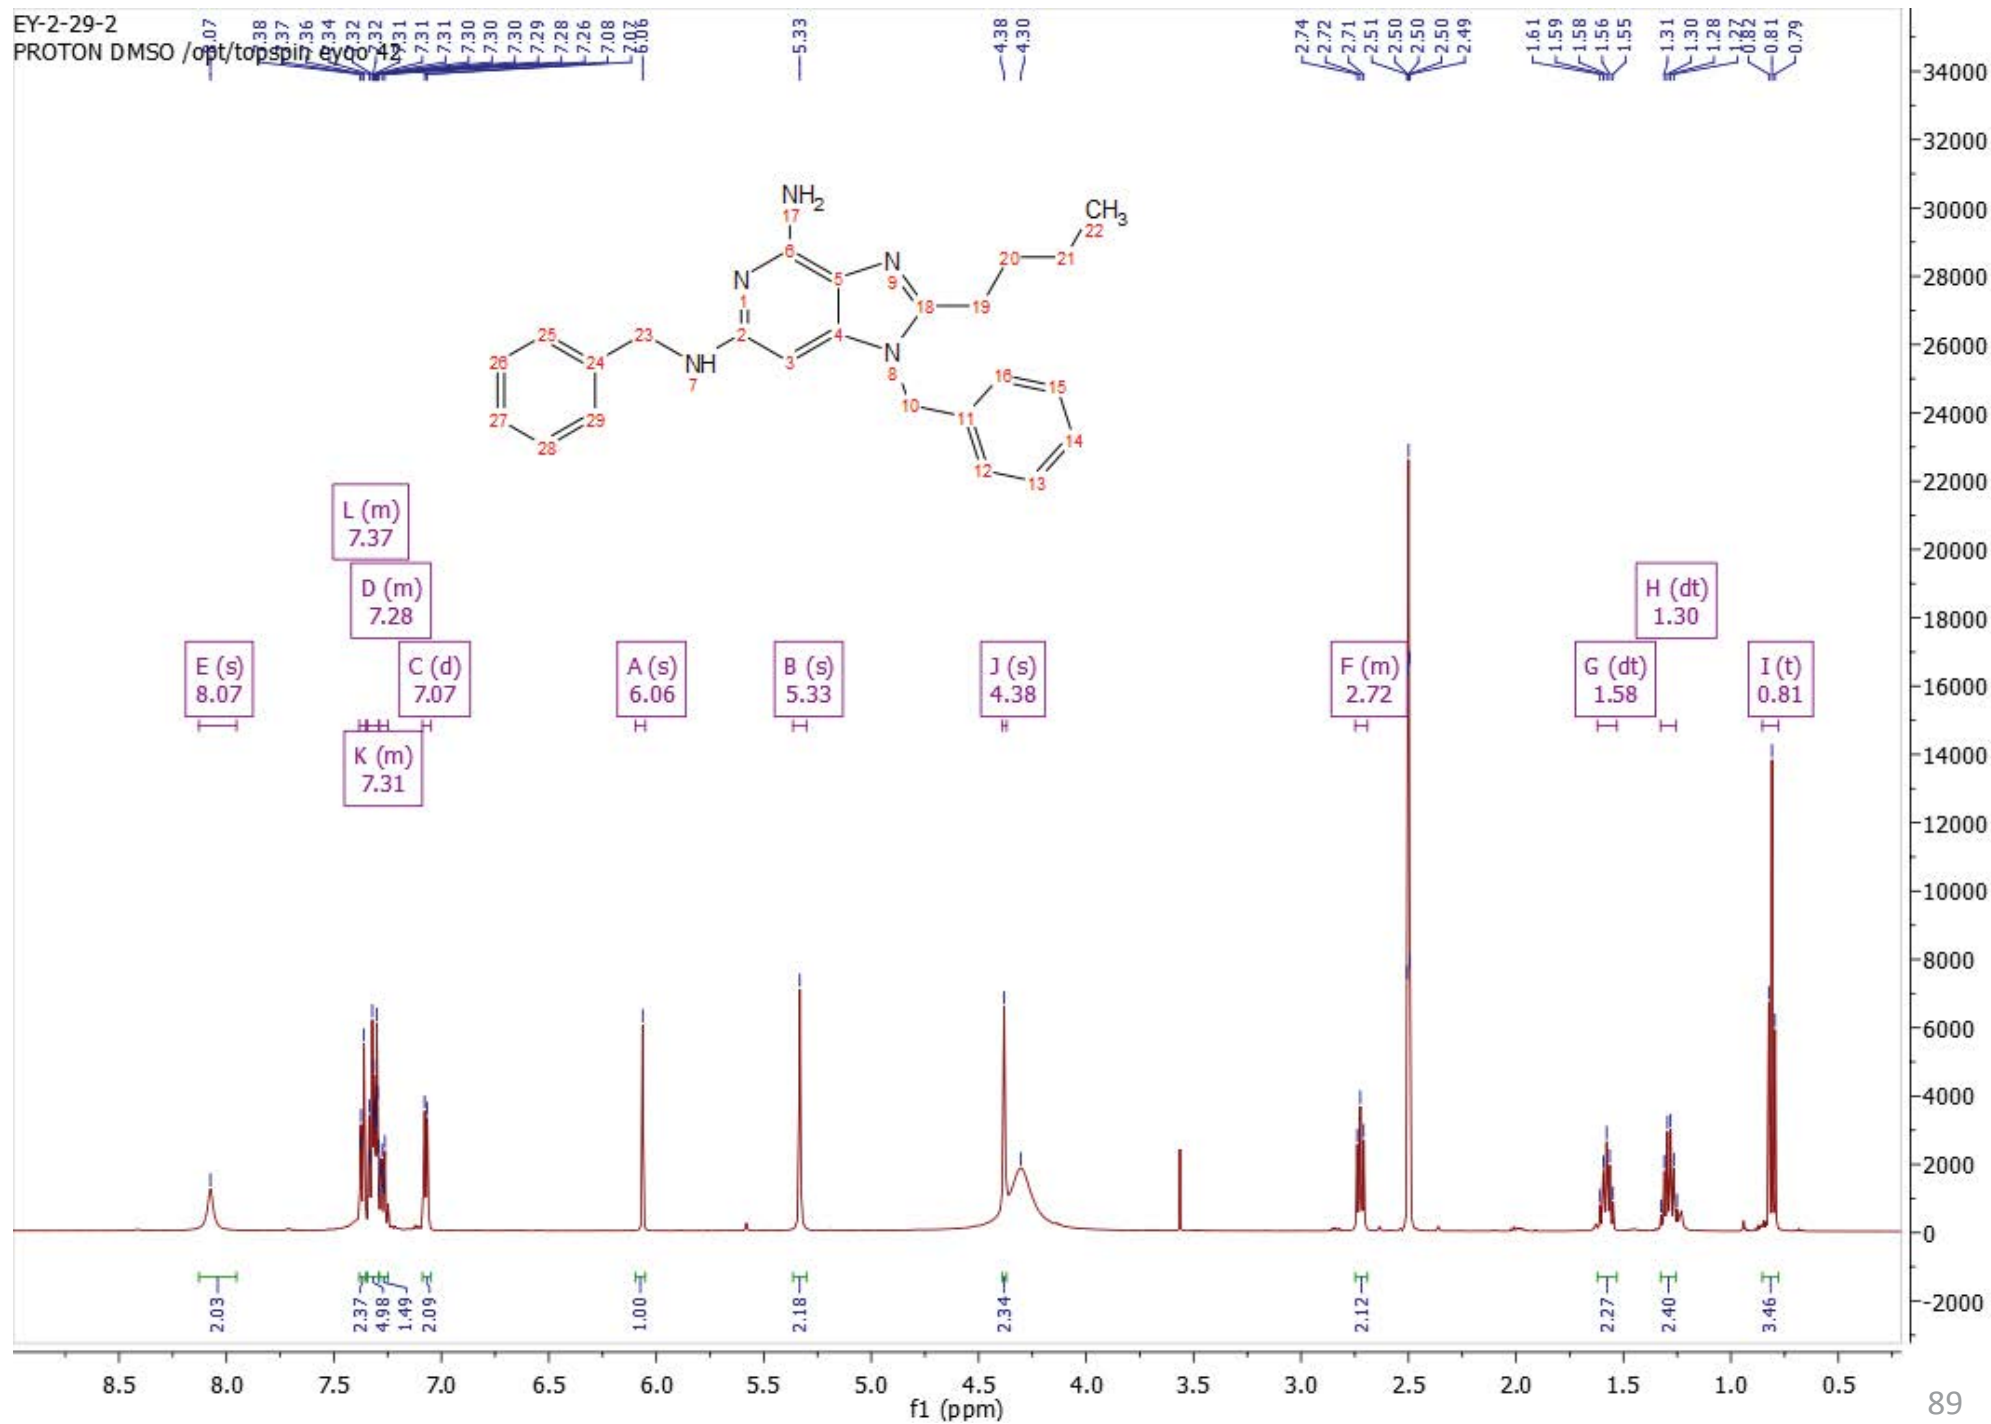

# 19f <sup>13</sup>C NMR

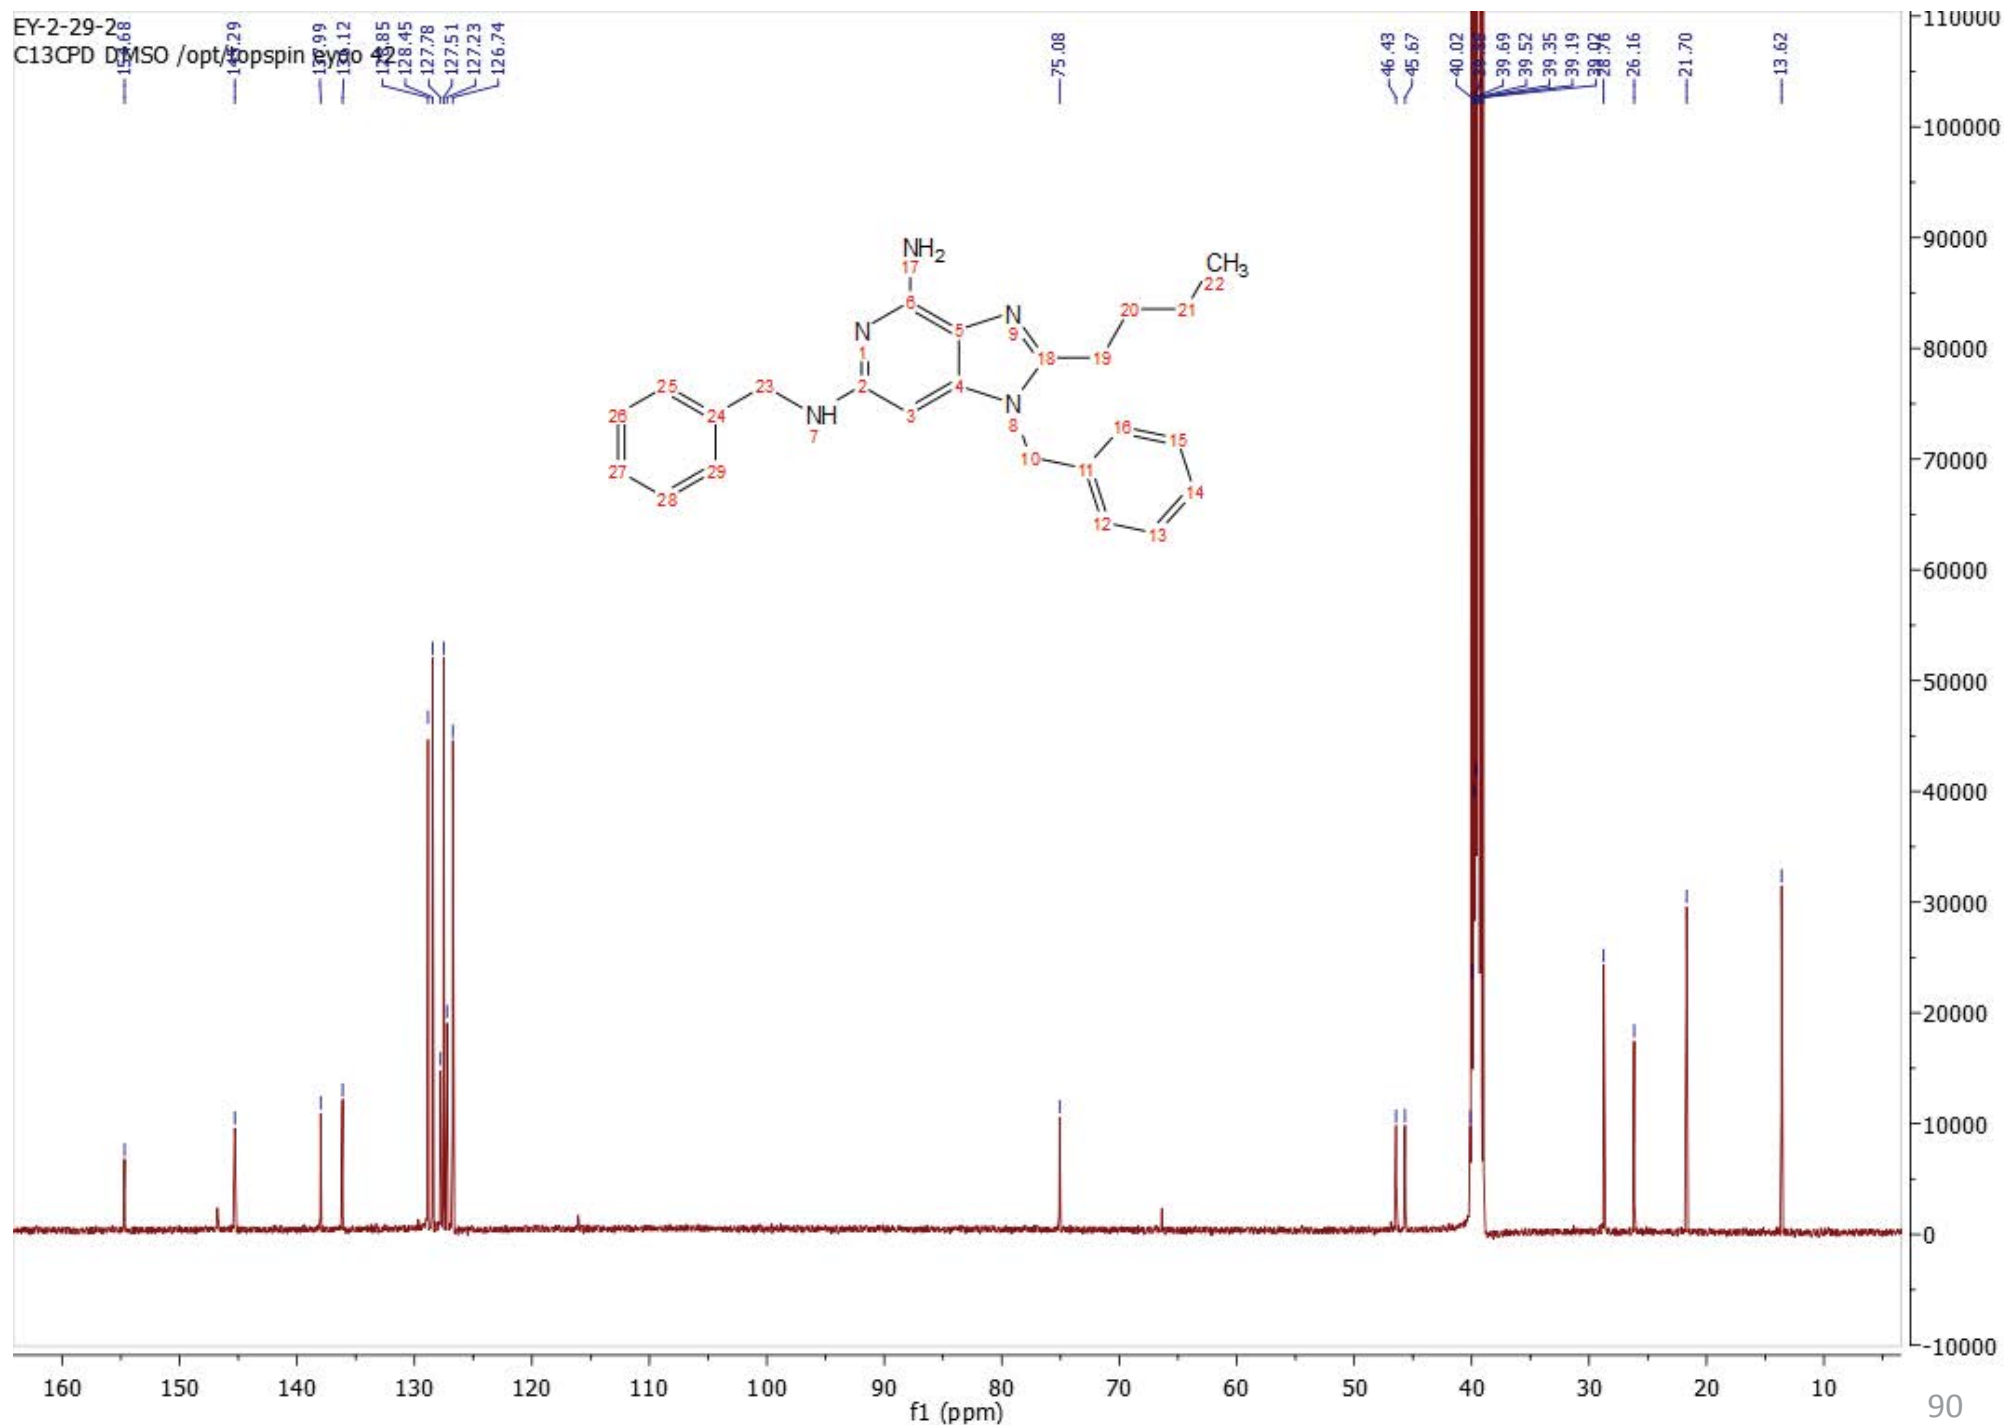

# 19f MS

|               |                    |             |                      |                 |              |                        |                     |
|---------------|--------------------|-------------|----------------------|-----------------|--------------|------------------------|---------------------|
| Sample Name   | 05.09.12 EY-2-29   | Position    | Vial 1               | Instrument Name | Instrument 1 | User Name              |                     |
| Inj Vol       | -1                 | InjPosition |                      | SampleType      | Sample       | IRM Calibration Status | Success             |
| Data Filename | 05.09.12 EY-2-29.d | ACQ Method  | Water-ACN Infusion M | Comment         |              | Acquired Time          | 5/9/2012 4:13:05 PM |

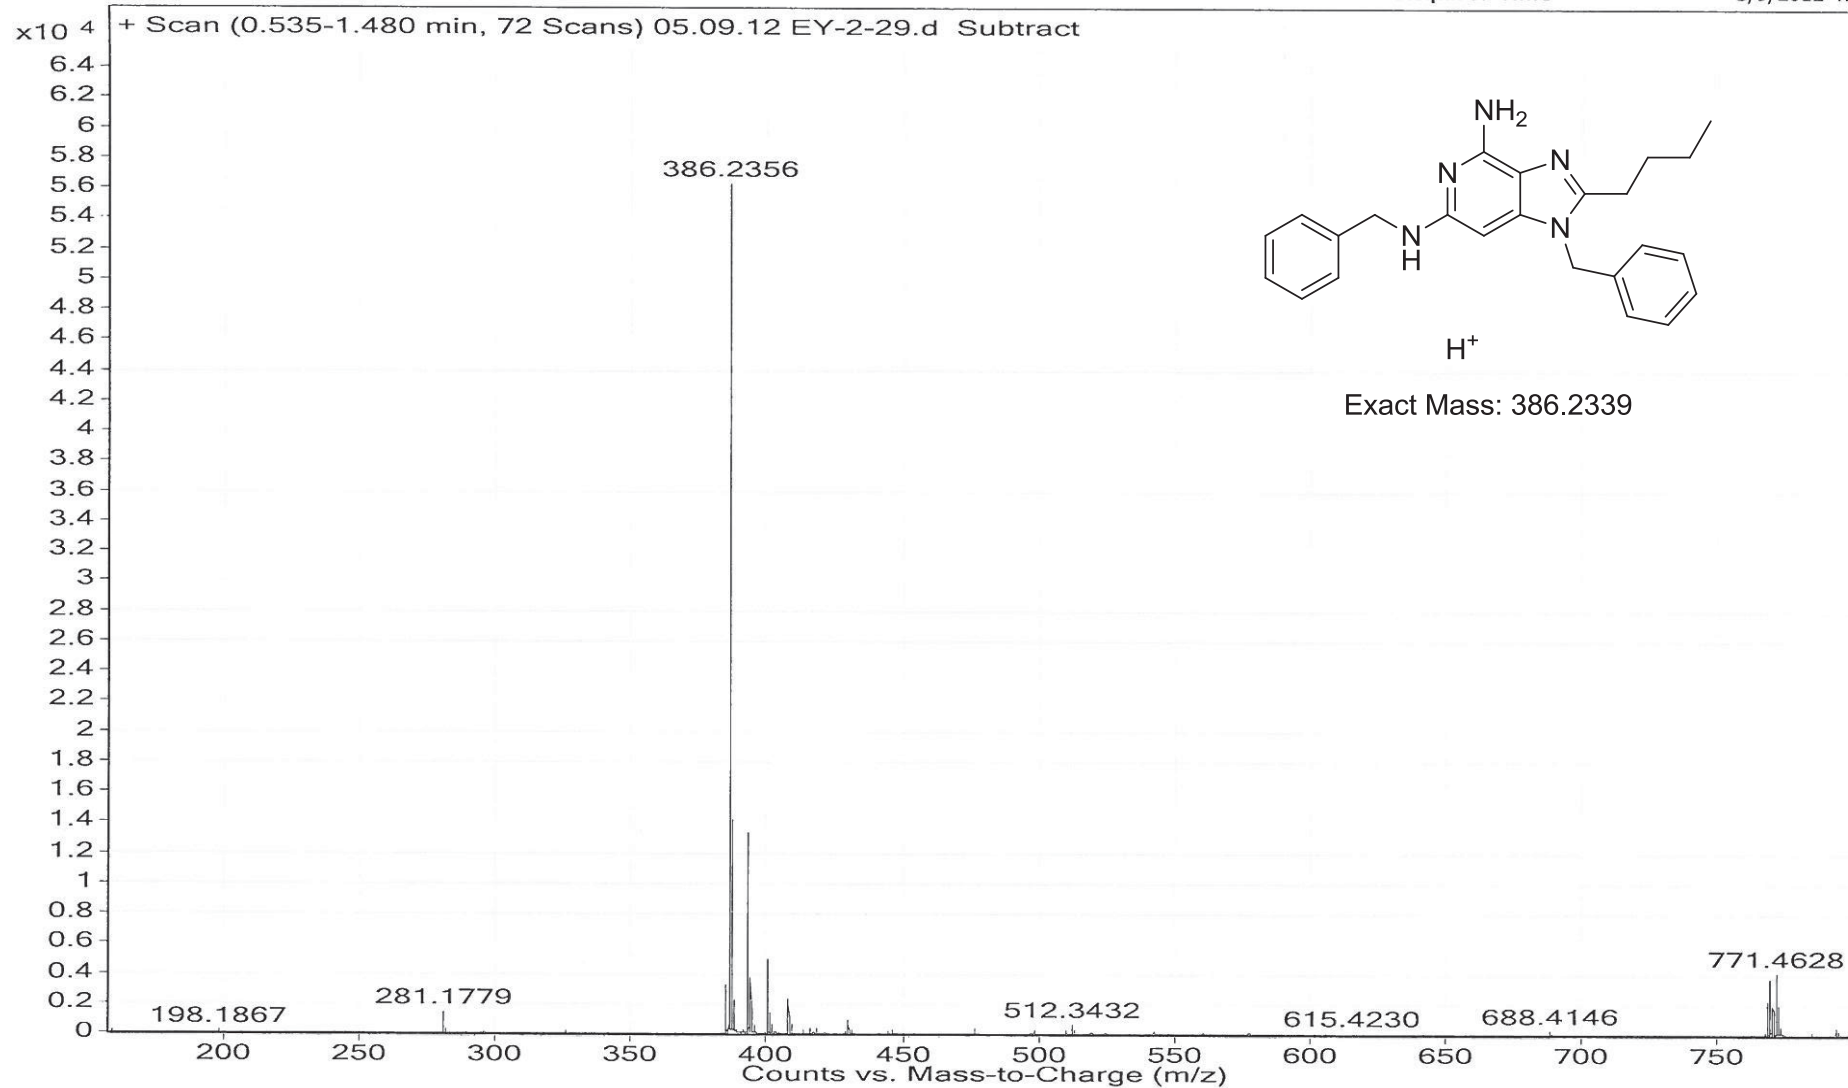

# 19f LC-MS

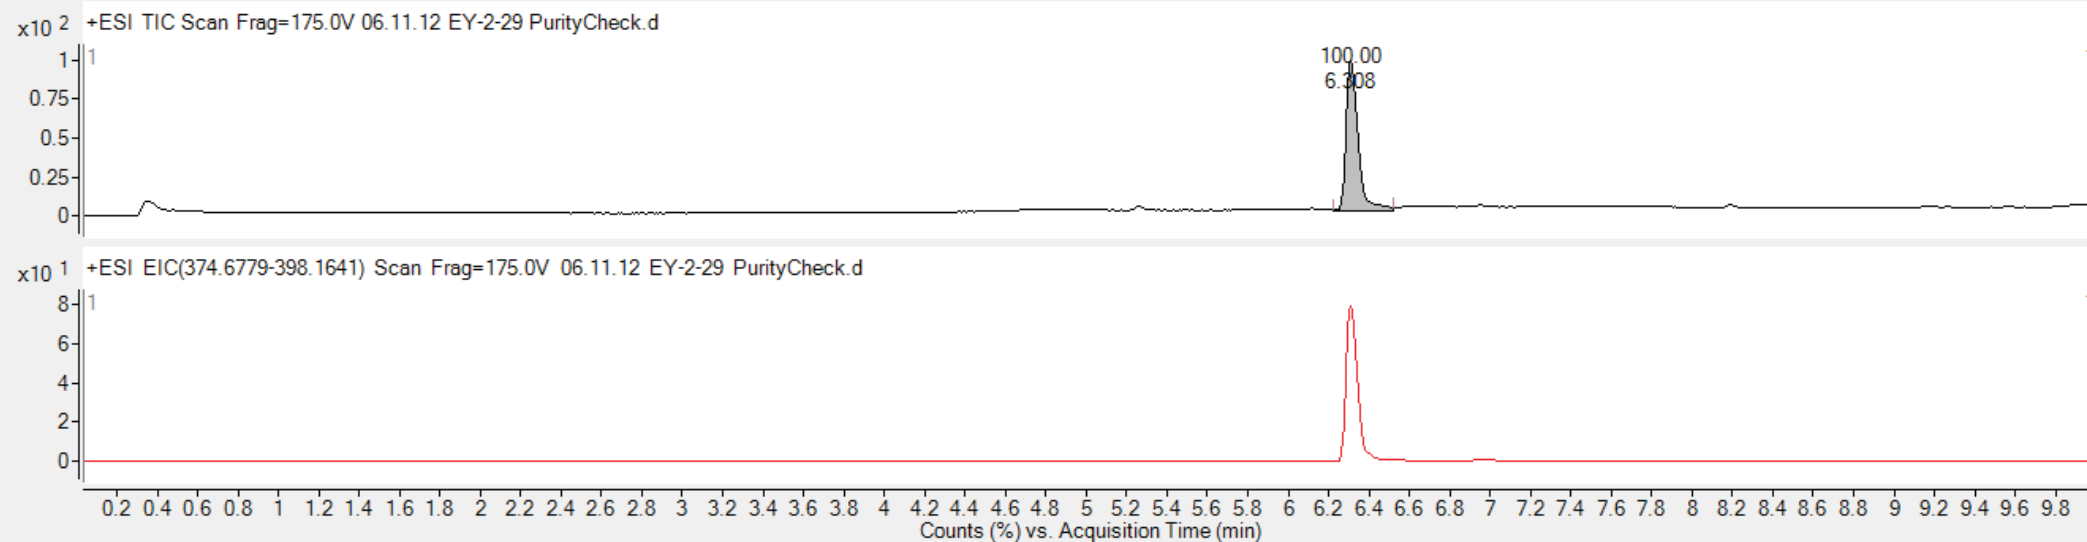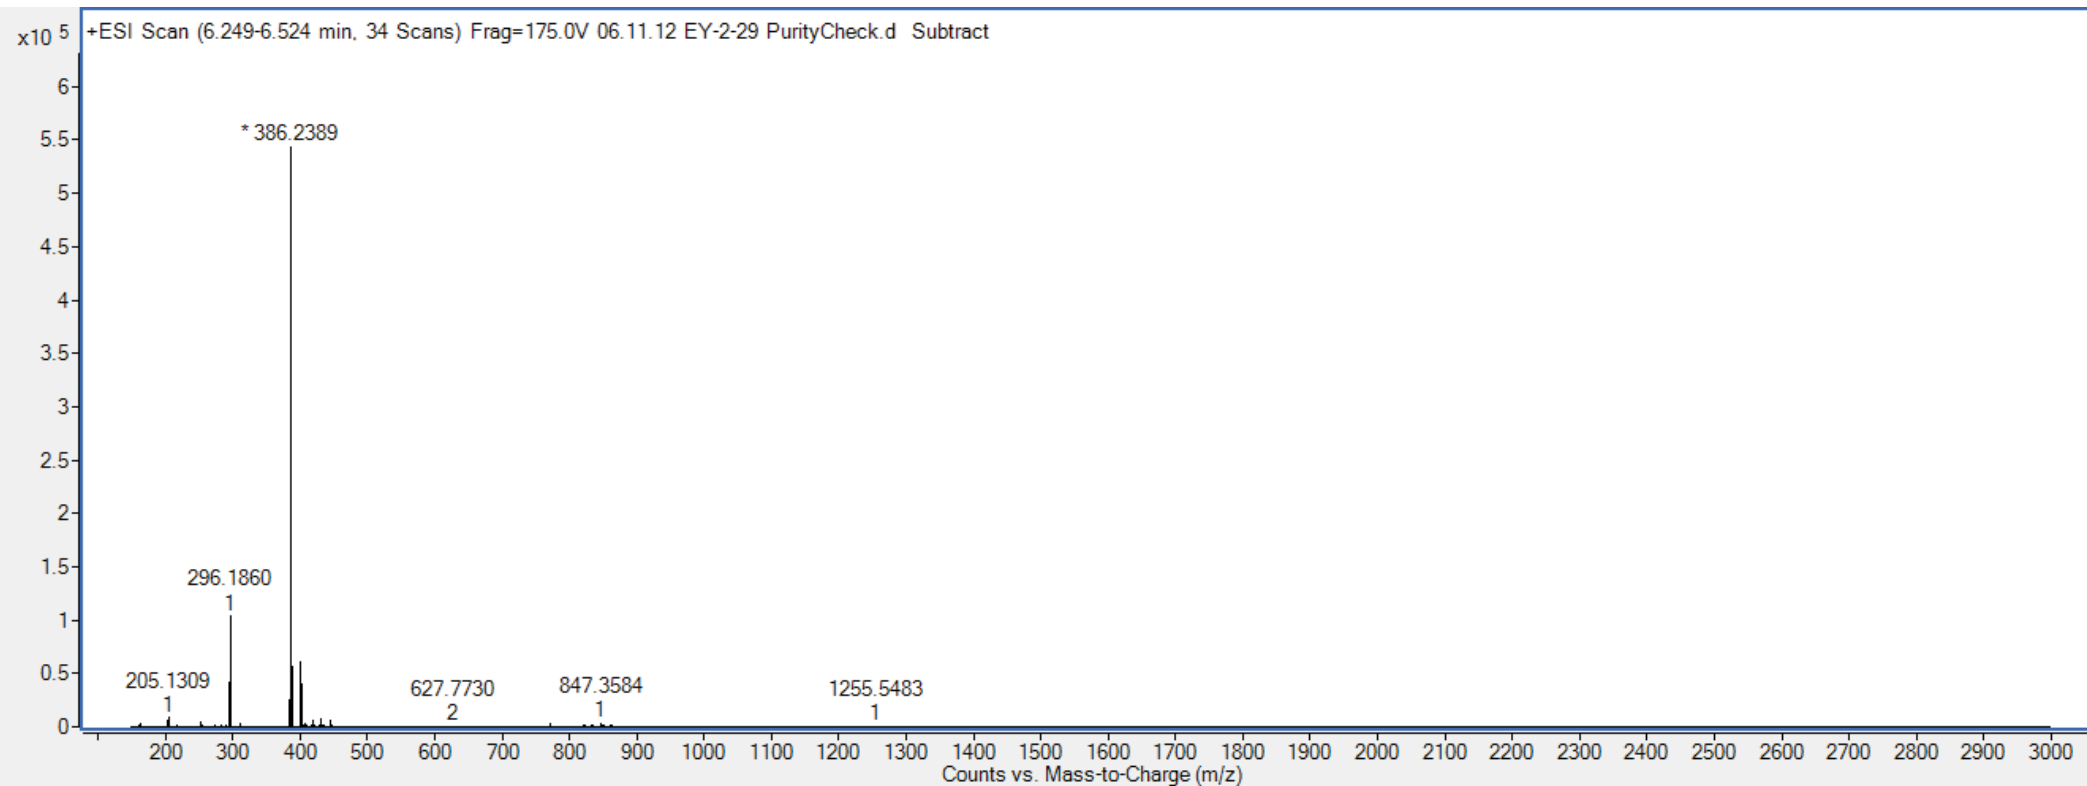

# 18g MS

|                      |                      |                    |                      |                        |              |                               |                      |
|----------------------|----------------------|--------------------|----------------------|------------------------|--------------|-------------------------------|----------------------|
| <b>Sample Name</b>   | 05.17.12 EY-2-42 tub | <b>Position</b>    | Vial 1               | <b>Instrument Name</b> | Instrument 1 | <b>User Name</b>              |                      |
| <b>Inj Vol</b>       | -1                   | <b>InjPosition</b> |                      | <b>SampleType</b>      | Sample       | <b>IRM Calibration Status</b> | Success              |
| <b>Data Filename</b> | 05.17.12 EY-2-42 tub | <b>ACQ Method</b>  | Water-ACN Infusion M | <b>Comment</b>         |              | <b>Acquired Time</b>          | 5/17/2012 3:21:31 PM |

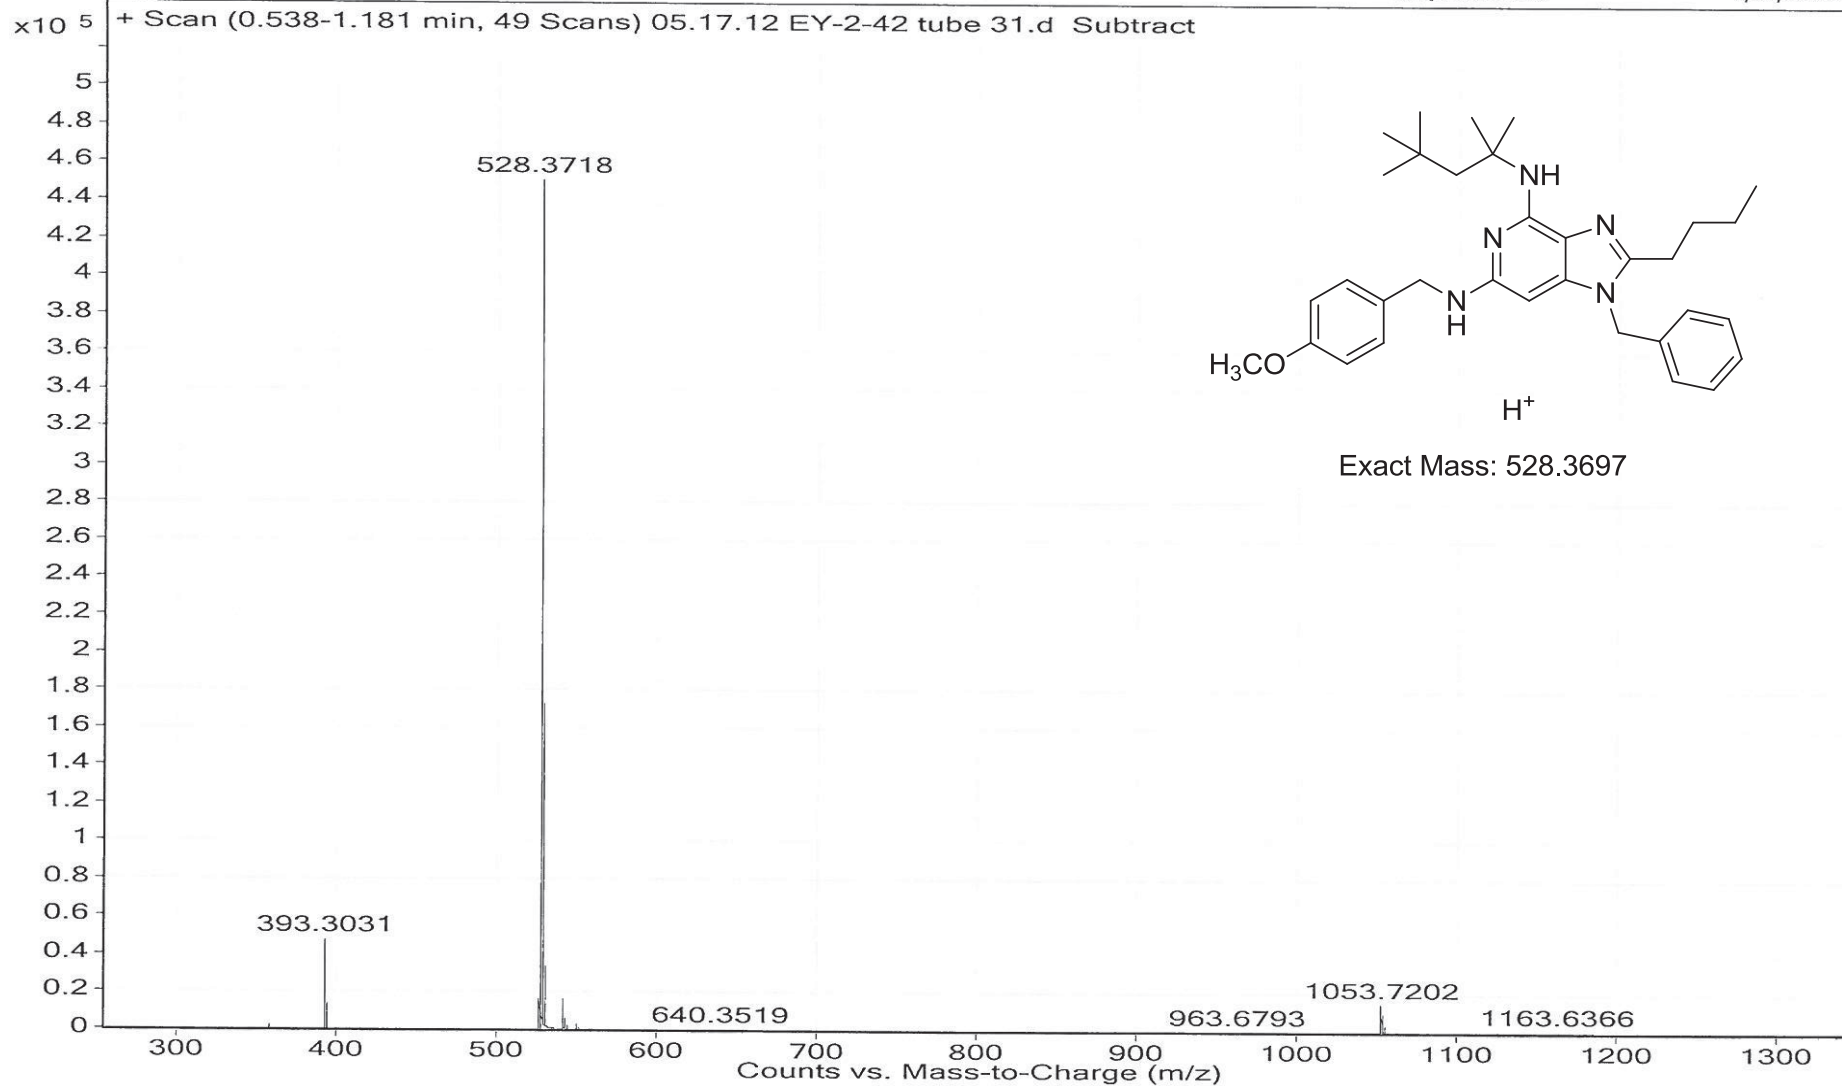

# 19g <sup>1</sup>H NMR

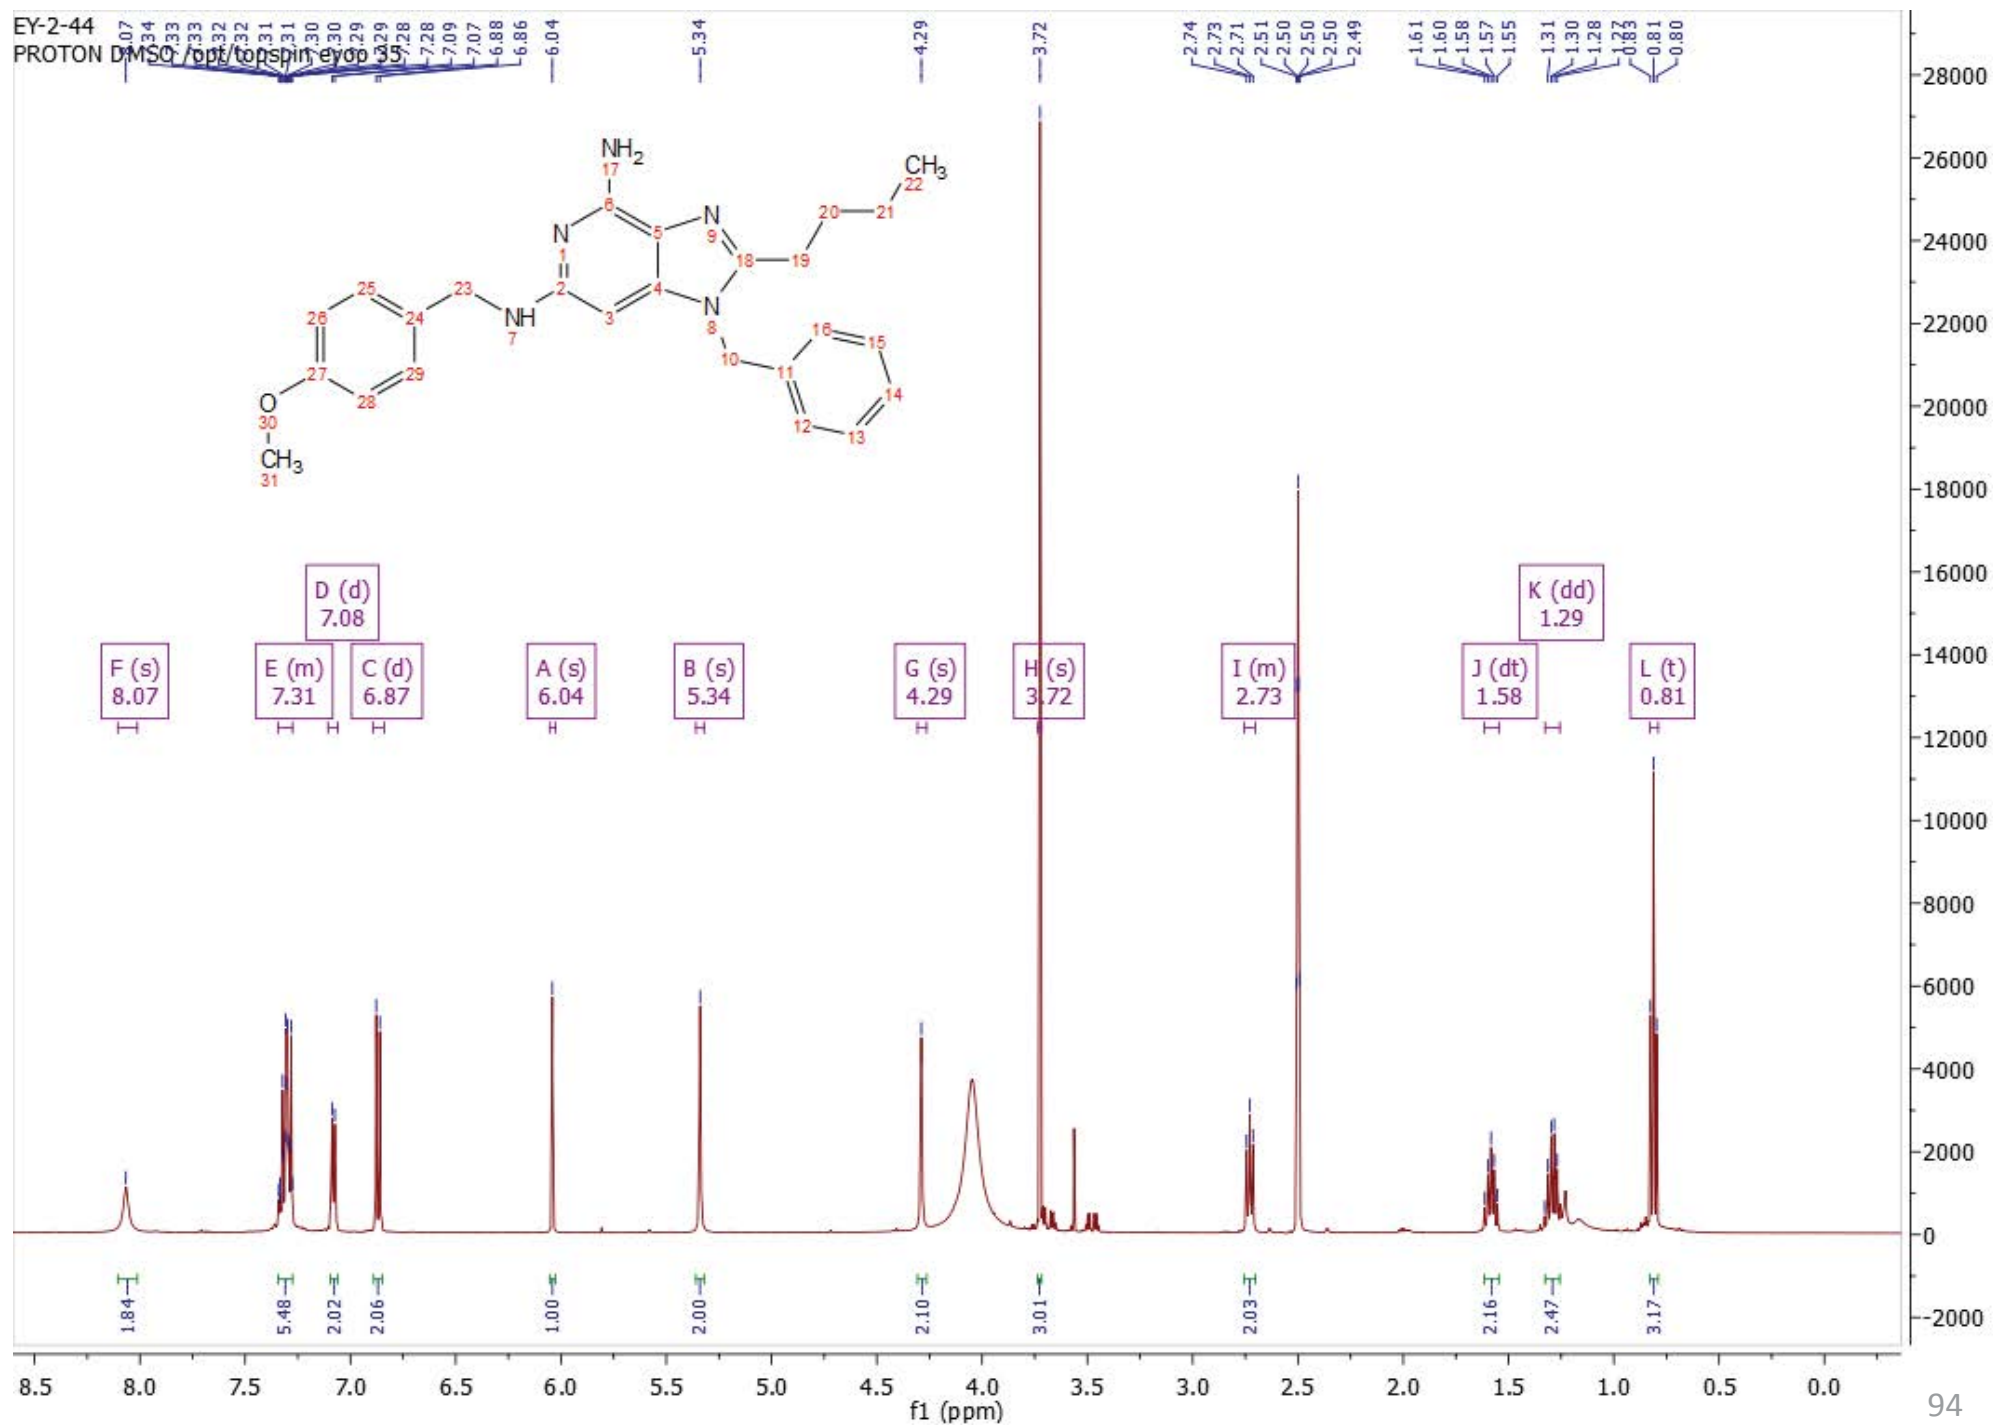

# 19g <sup>13</sup>C NMR

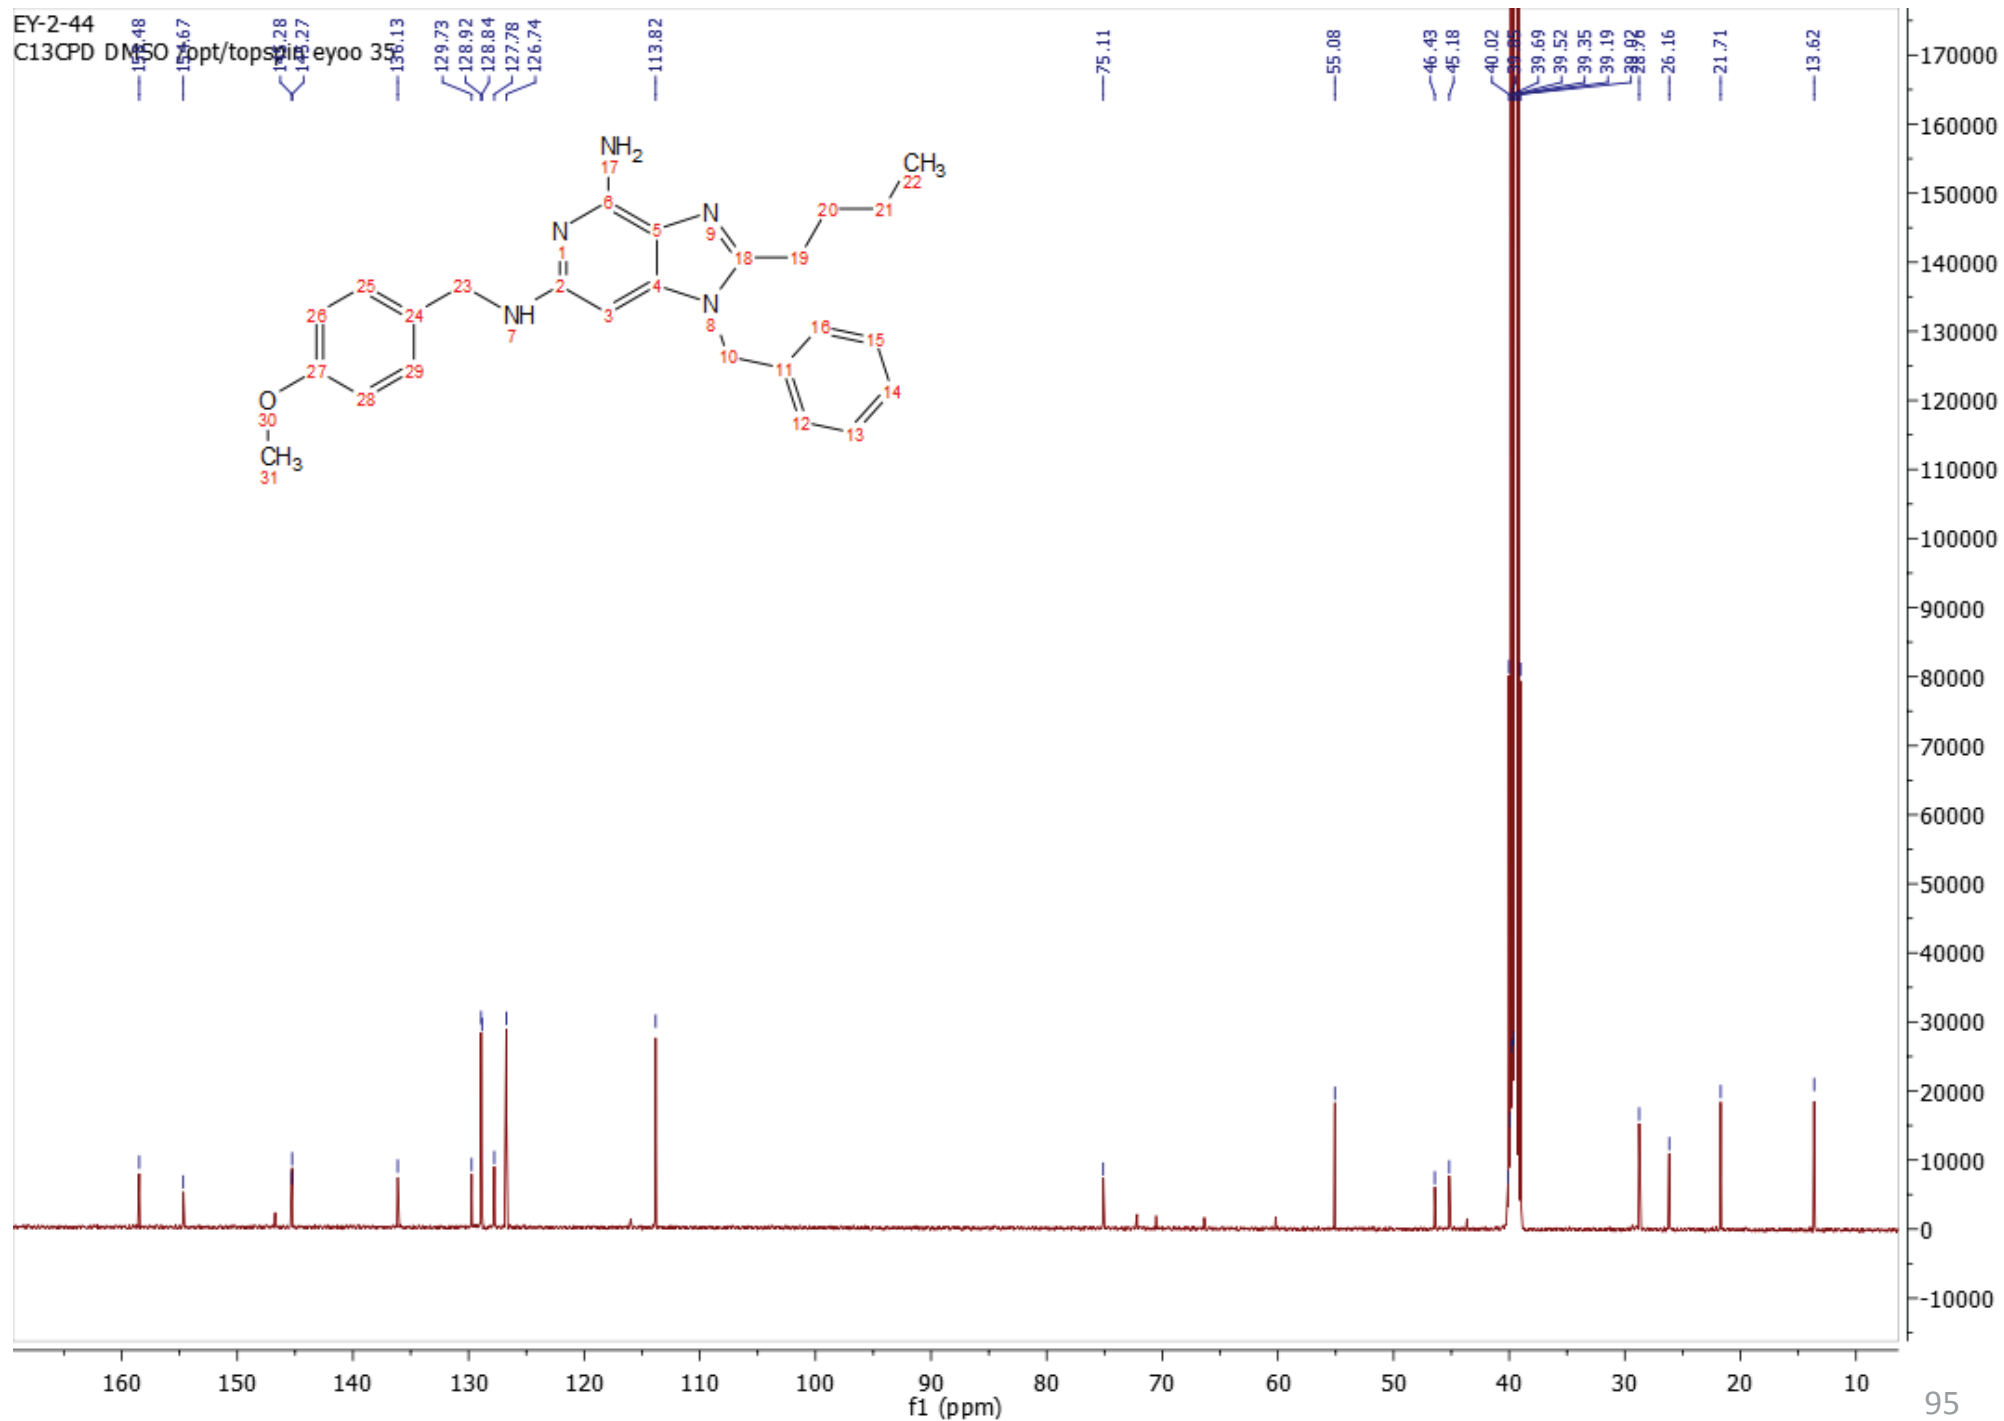



# 19g MS

|               |                    |             |                      |                 |              |                        |                       |
|---------------|--------------------|-------------|----------------------|-----------------|--------------|------------------------|-----------------------|
| Sample Name   | 05.18.12 EY-2-44   | Position    | Vial 1               | Instrument Name | Instrument 1 | User Name              |                       |
| Inj Vol       | -1                 | InjPosition |                      | SampleType      | Sample       | IRM Calibration Status | Success               |
| Data Filename | 05.18.12 EY-2-44.d | ACQ Method  | Water-ACN Infusion M | Comment         |              | Acquired Time          | 5/18/2012 10:14:45 AM |

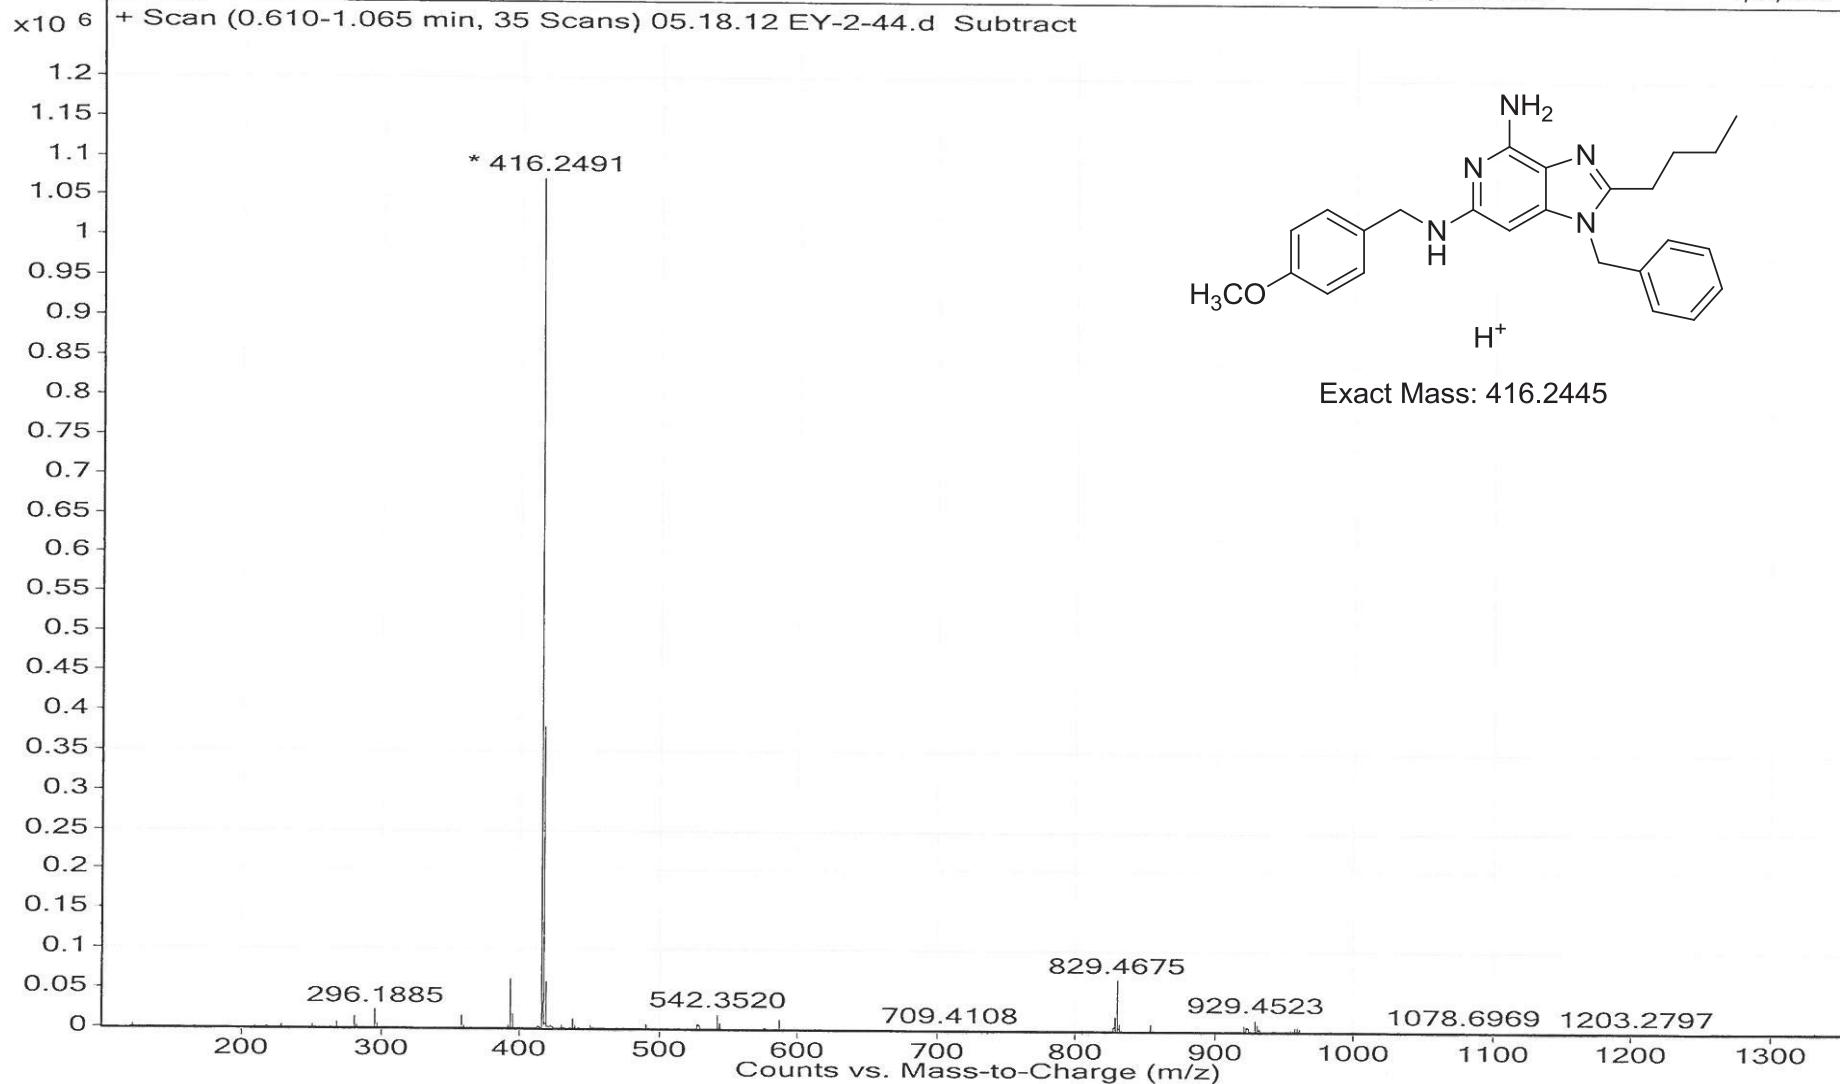



# 19g LC-MS

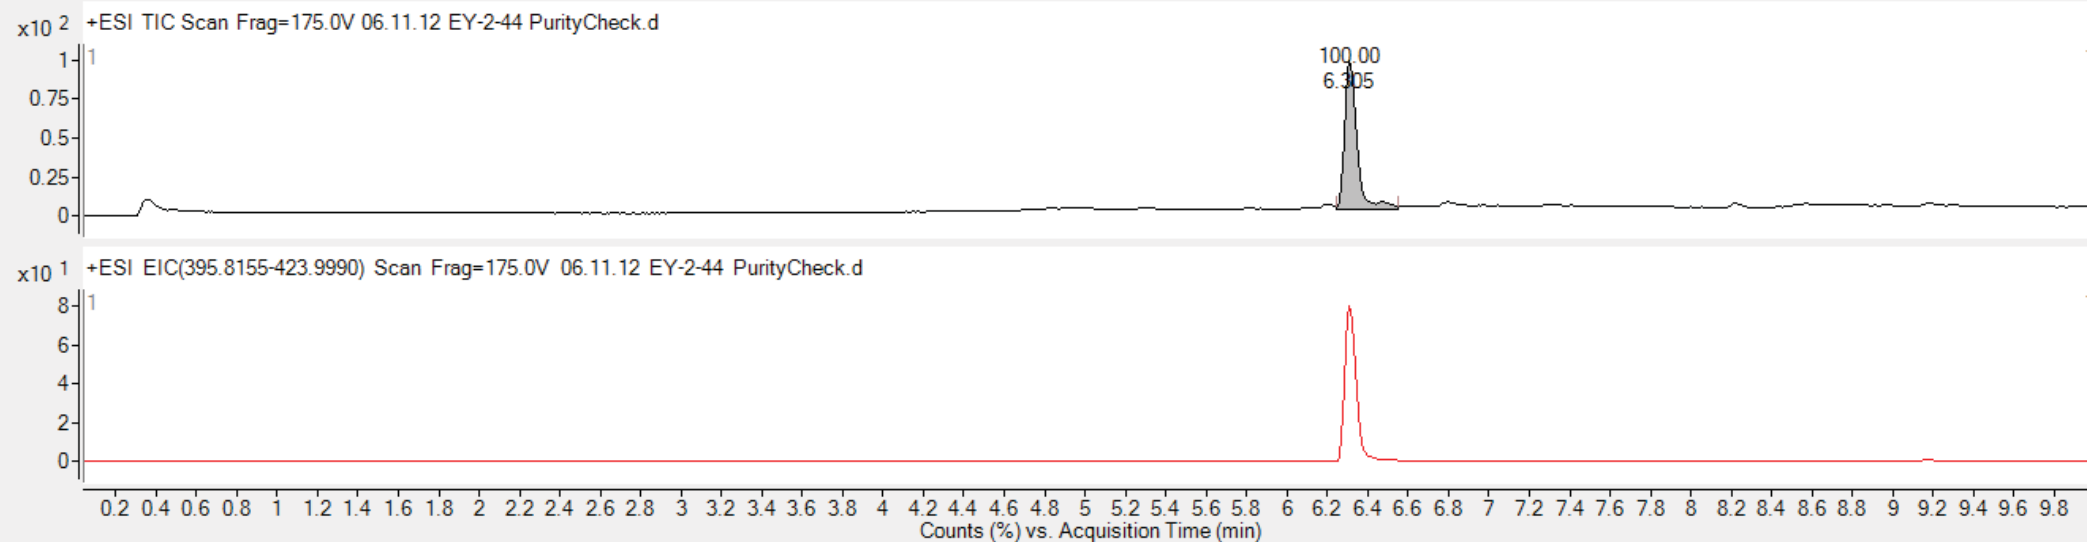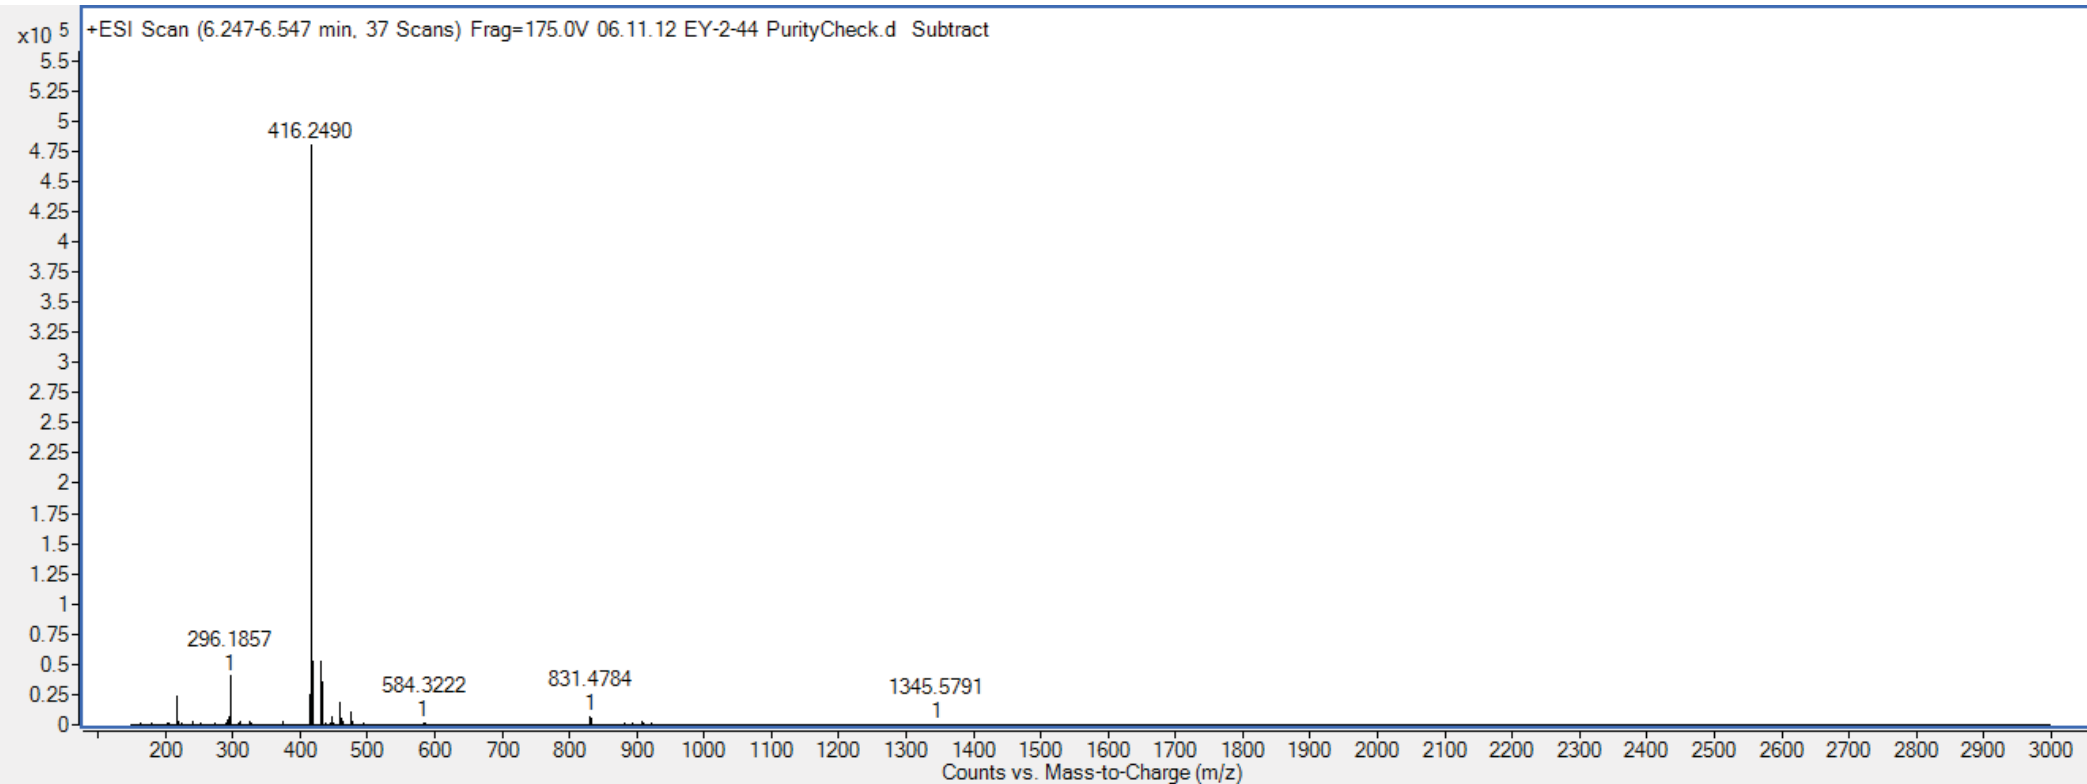

18h MS

| Sample Name   | 05.29.12 EY-2-63   | Position    | Vial 2               | Instrument Name | Instrument 1 | User Name              |
|---------------|--------------------|-------------|----------------------|-----------------|--------------|------------------------|
| Inj Vol       | -1                 | InjPosition |                      | SampleType      | Sample       | IRM Calibration Status |
| Data Filename | 05.29.12 EY-2-63.d | ACQ Method  | Water-ACN Infusion M | Comment         |              | Success                |
|               |                    |             |                      |                 |              | Acquired Time          |
|               |                    |             |                      |                 |              | 5/29/2012 3:17:24 PM   |

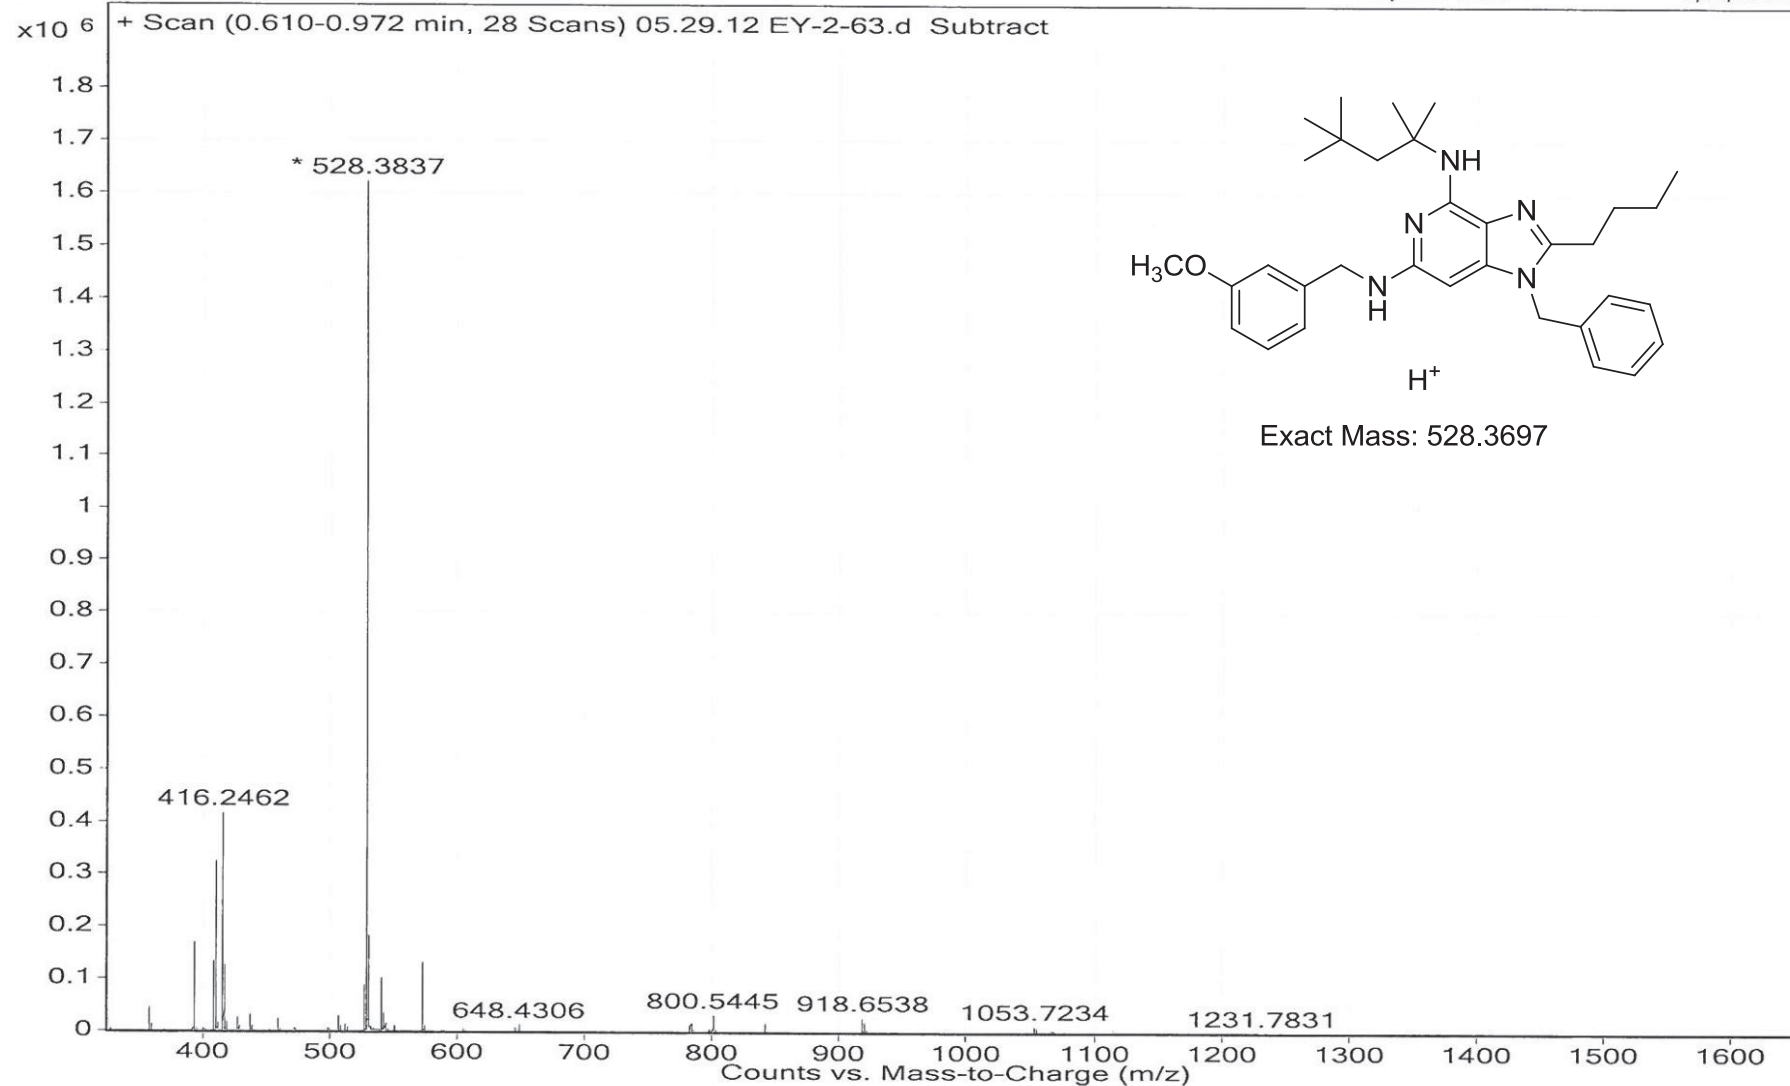

# 19h <sup>1</sup>H NMR

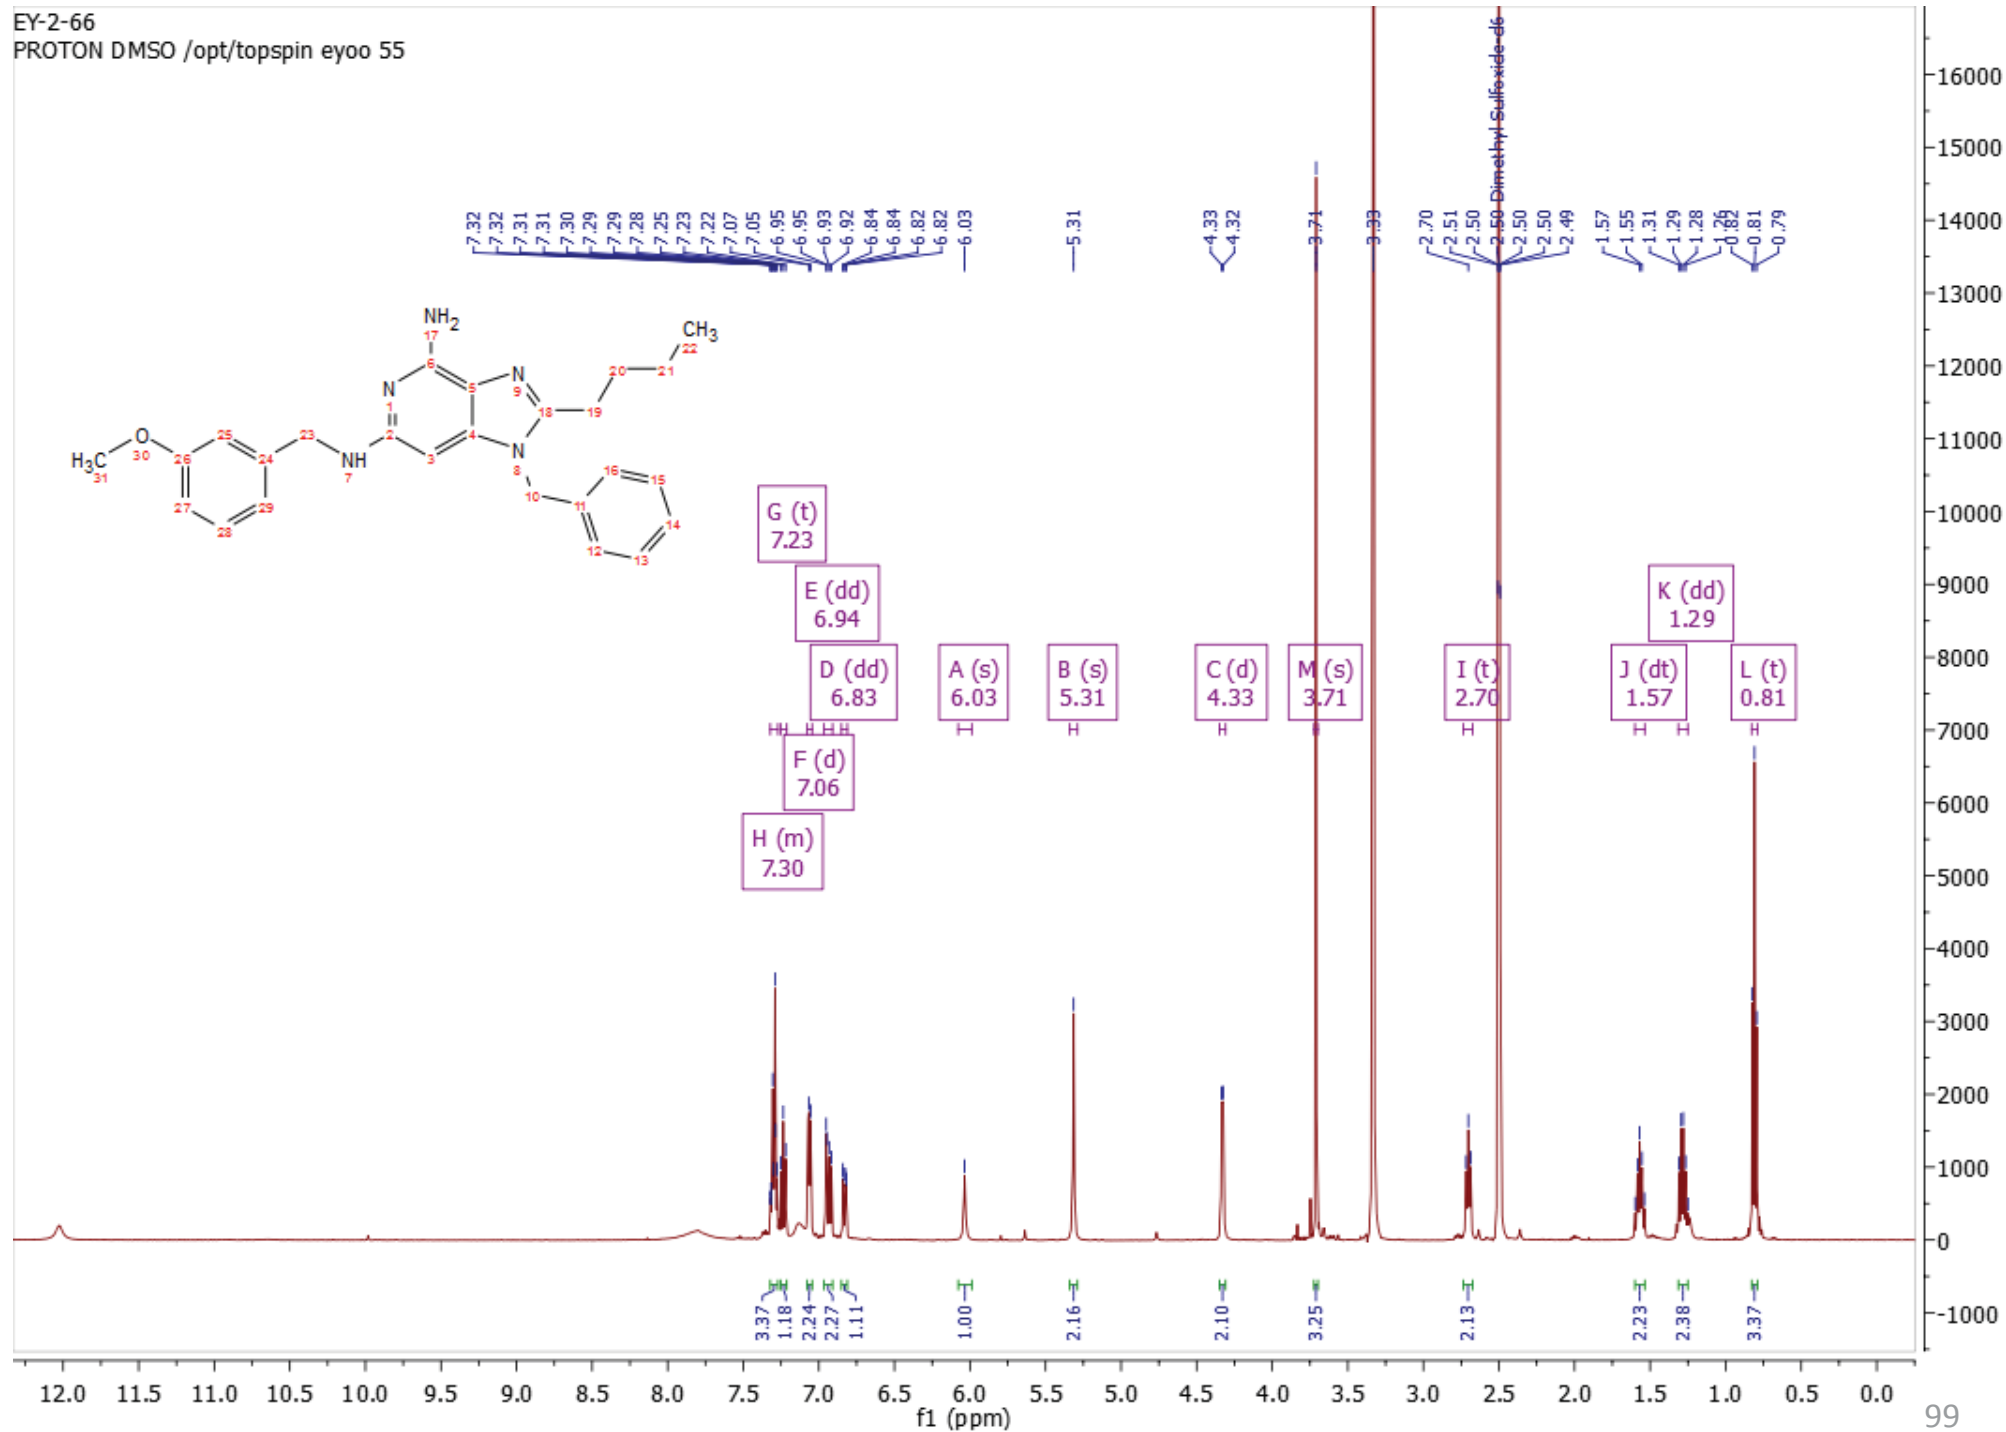

# **<sup>19</sup>F <sup>13</sup>C NMR**

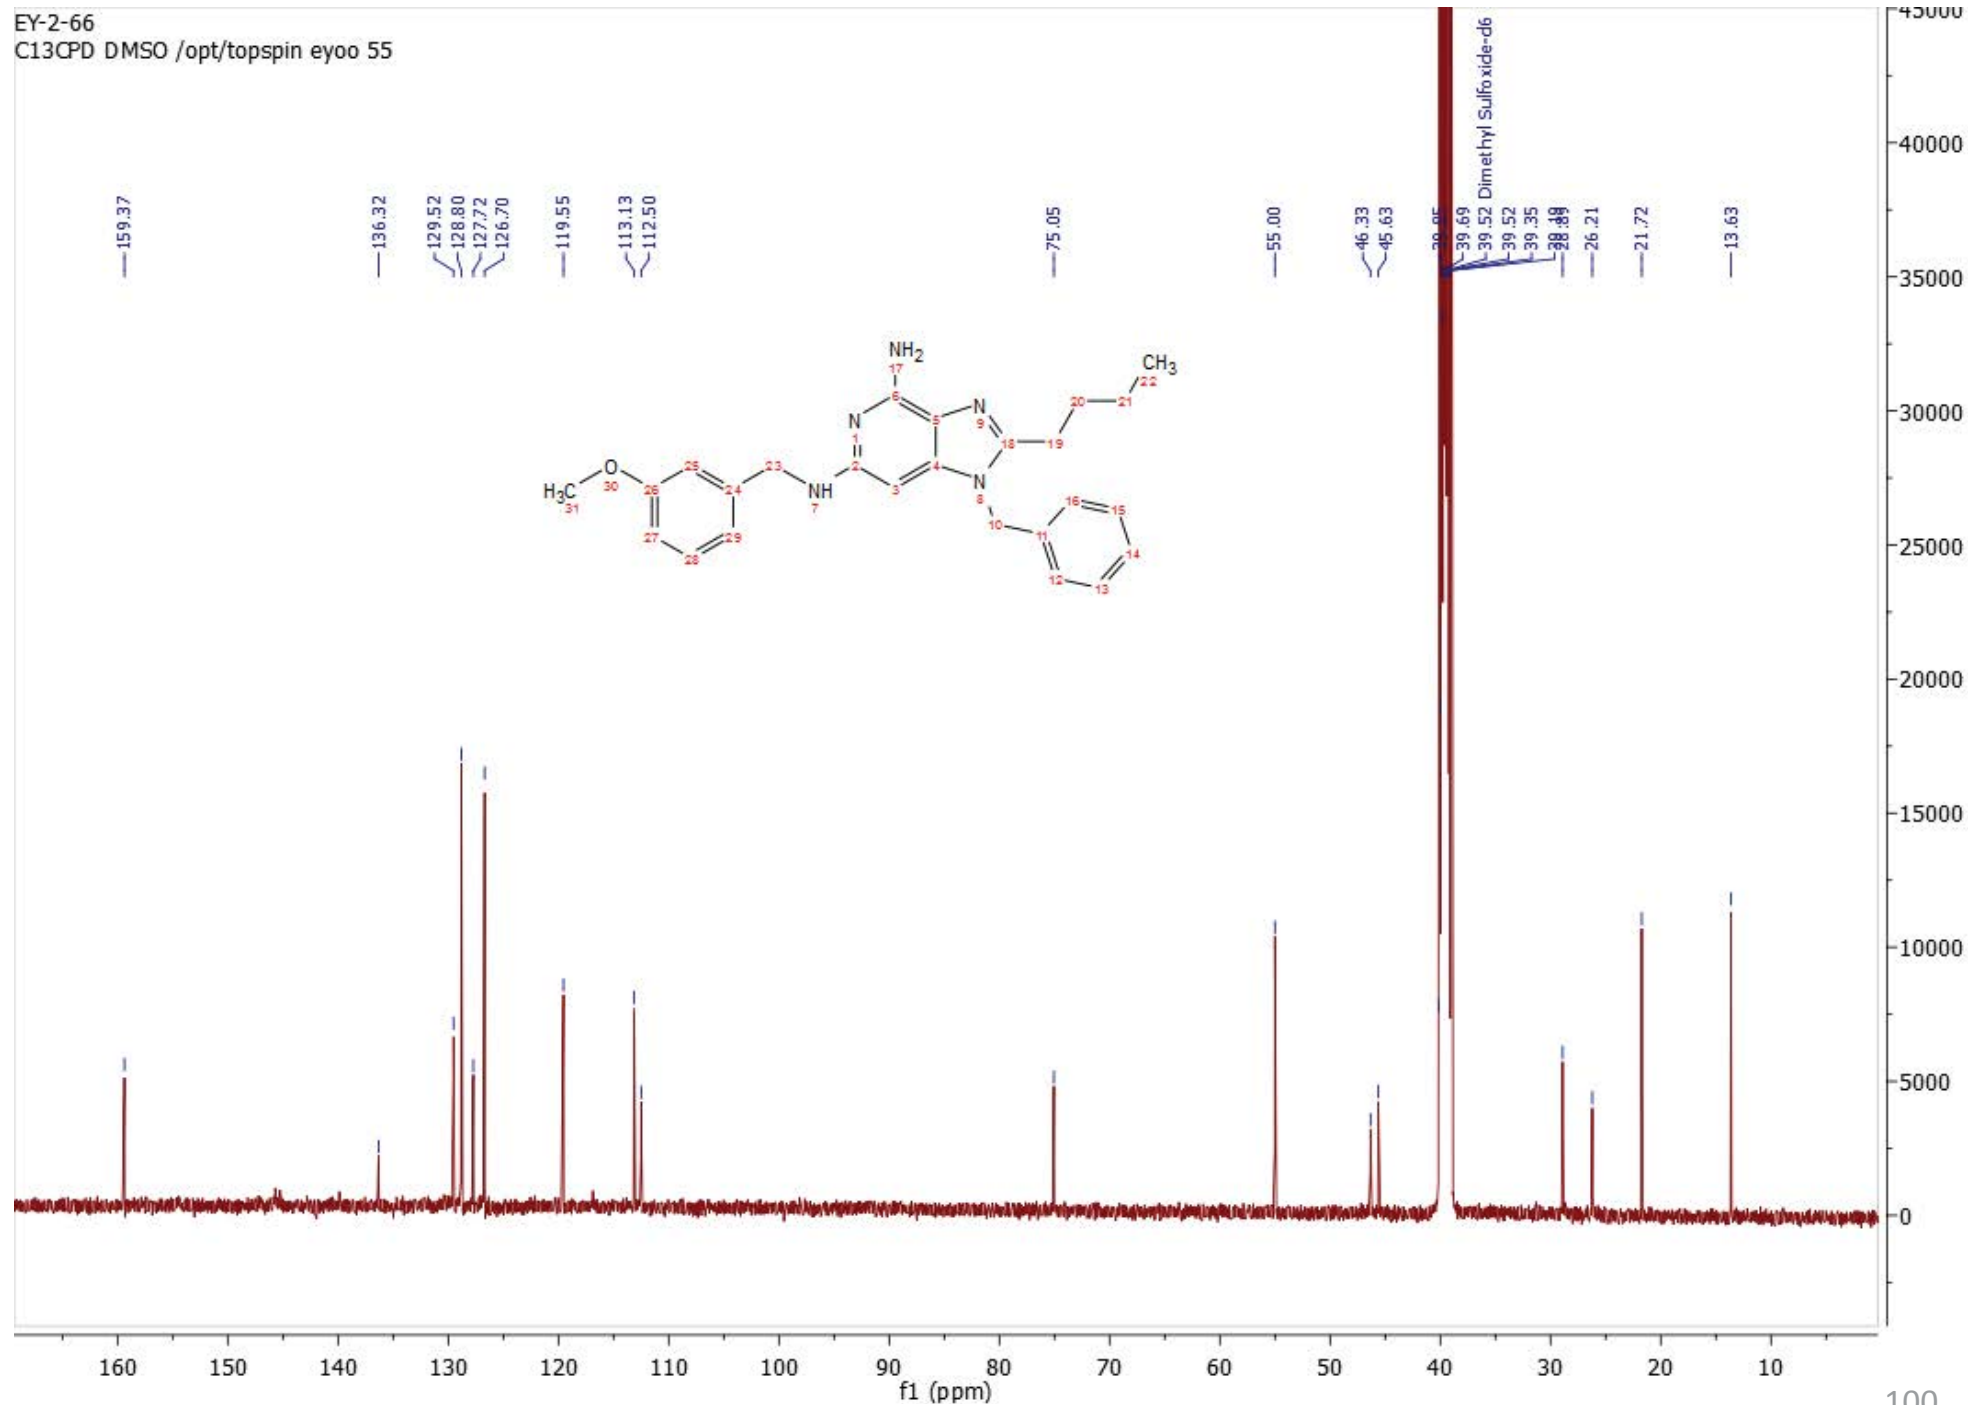

# 19h MS

|               |                      |             |                      |                 |              |                        |                      |
|---------------|----------------------|-------------|----------------------|-----------------|--------------|------------------------|----------------------|
| Sample Name   | 05.30.12 EY-2-66 tub | Position    | Vial 1               | Instrument Name | Instrument 1 | User Name              |                      |
| Inj Vol       | -1                   | InjPosition |                      | SampleType      | Sample       | IRM Calibration Status | Success              |
| Data Filename | 05.30.12 EY-2-66 tub | ACQ Method  | Water-ACN Infusion M | Comment         |              | Acquired Time          | 5/30/2012 4:34:33 PM |

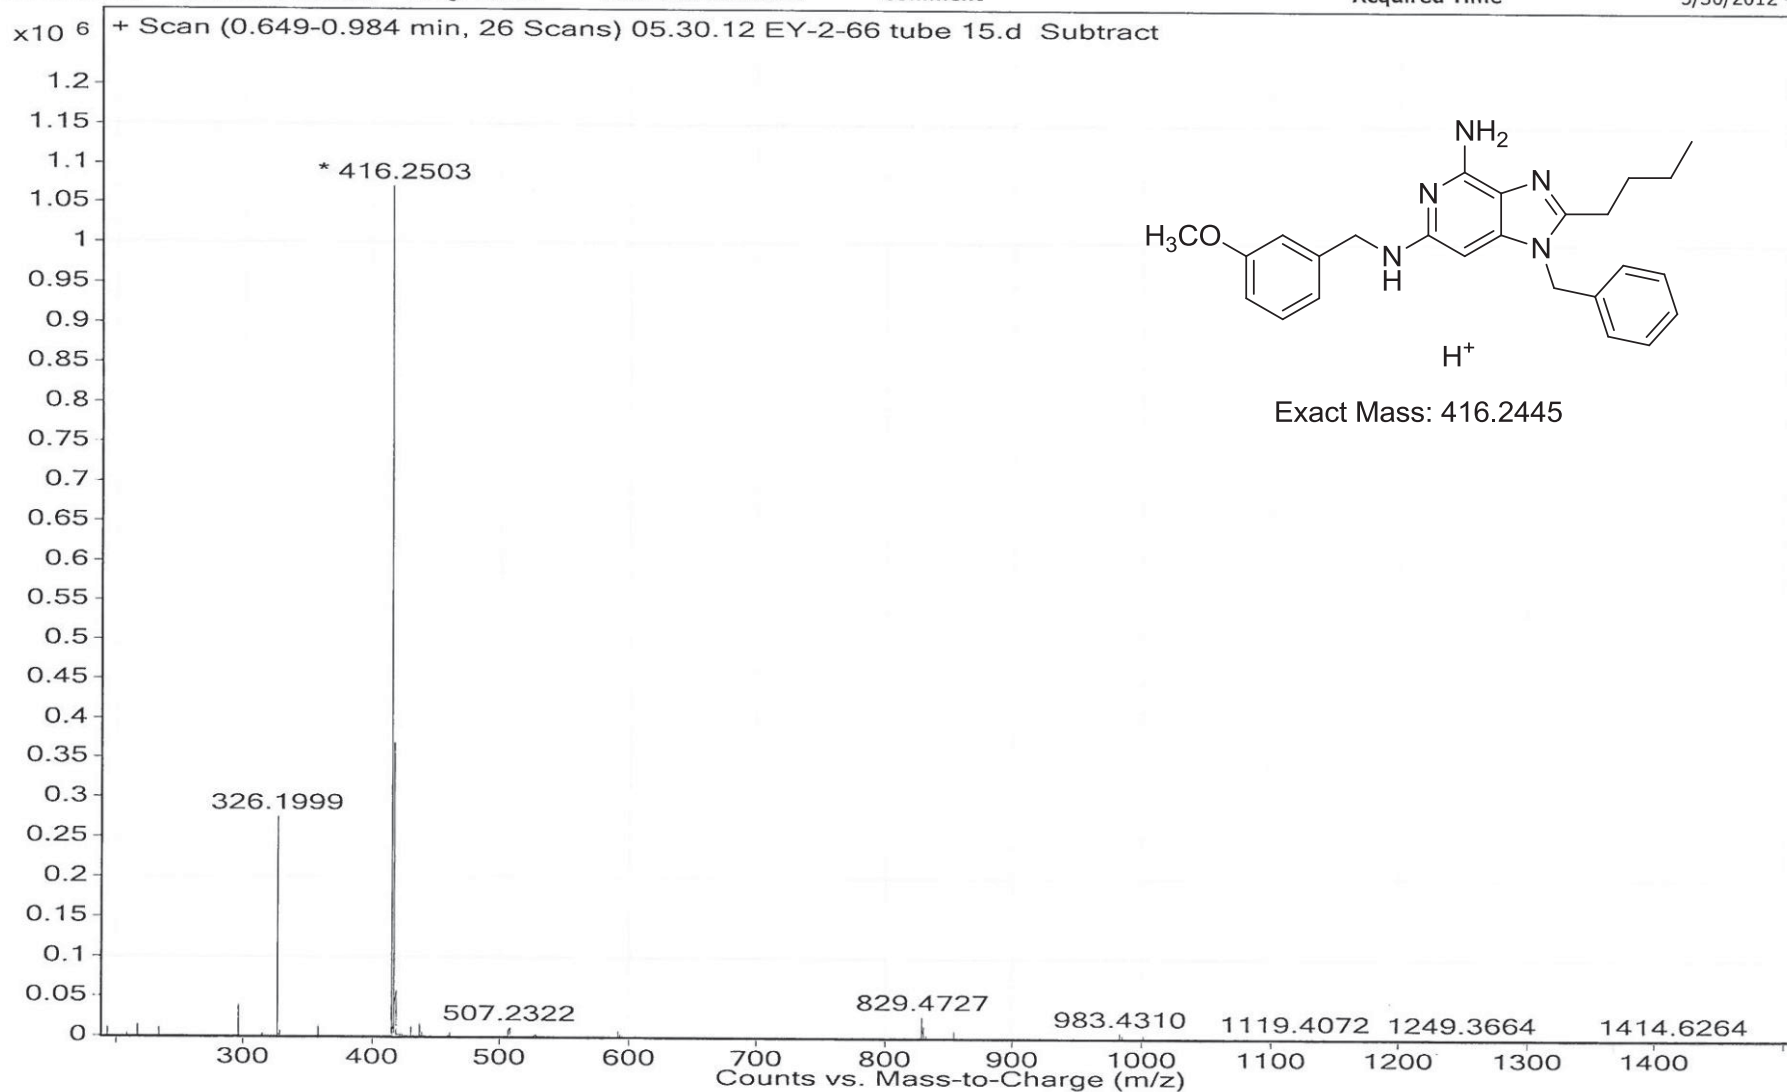

# 19h LC-MS

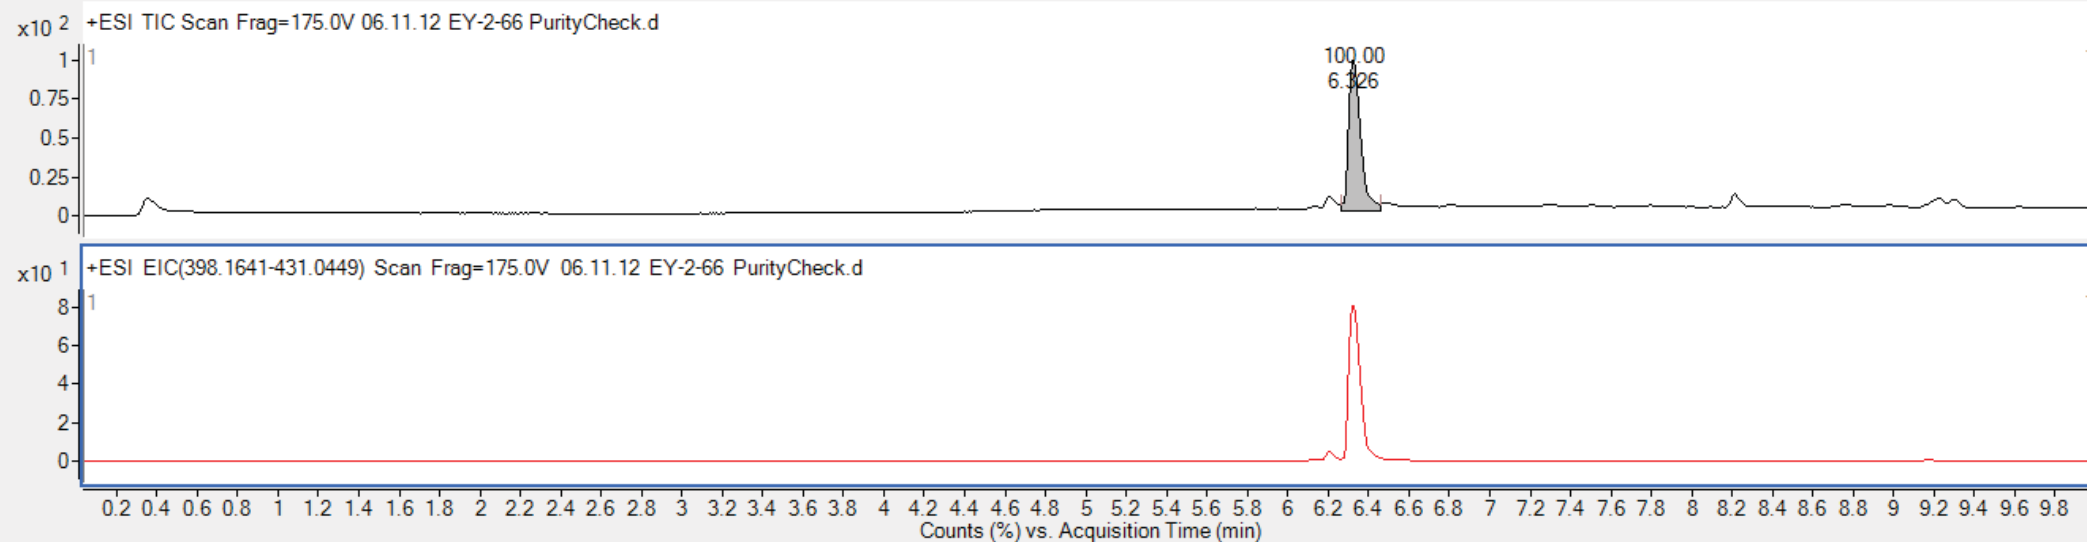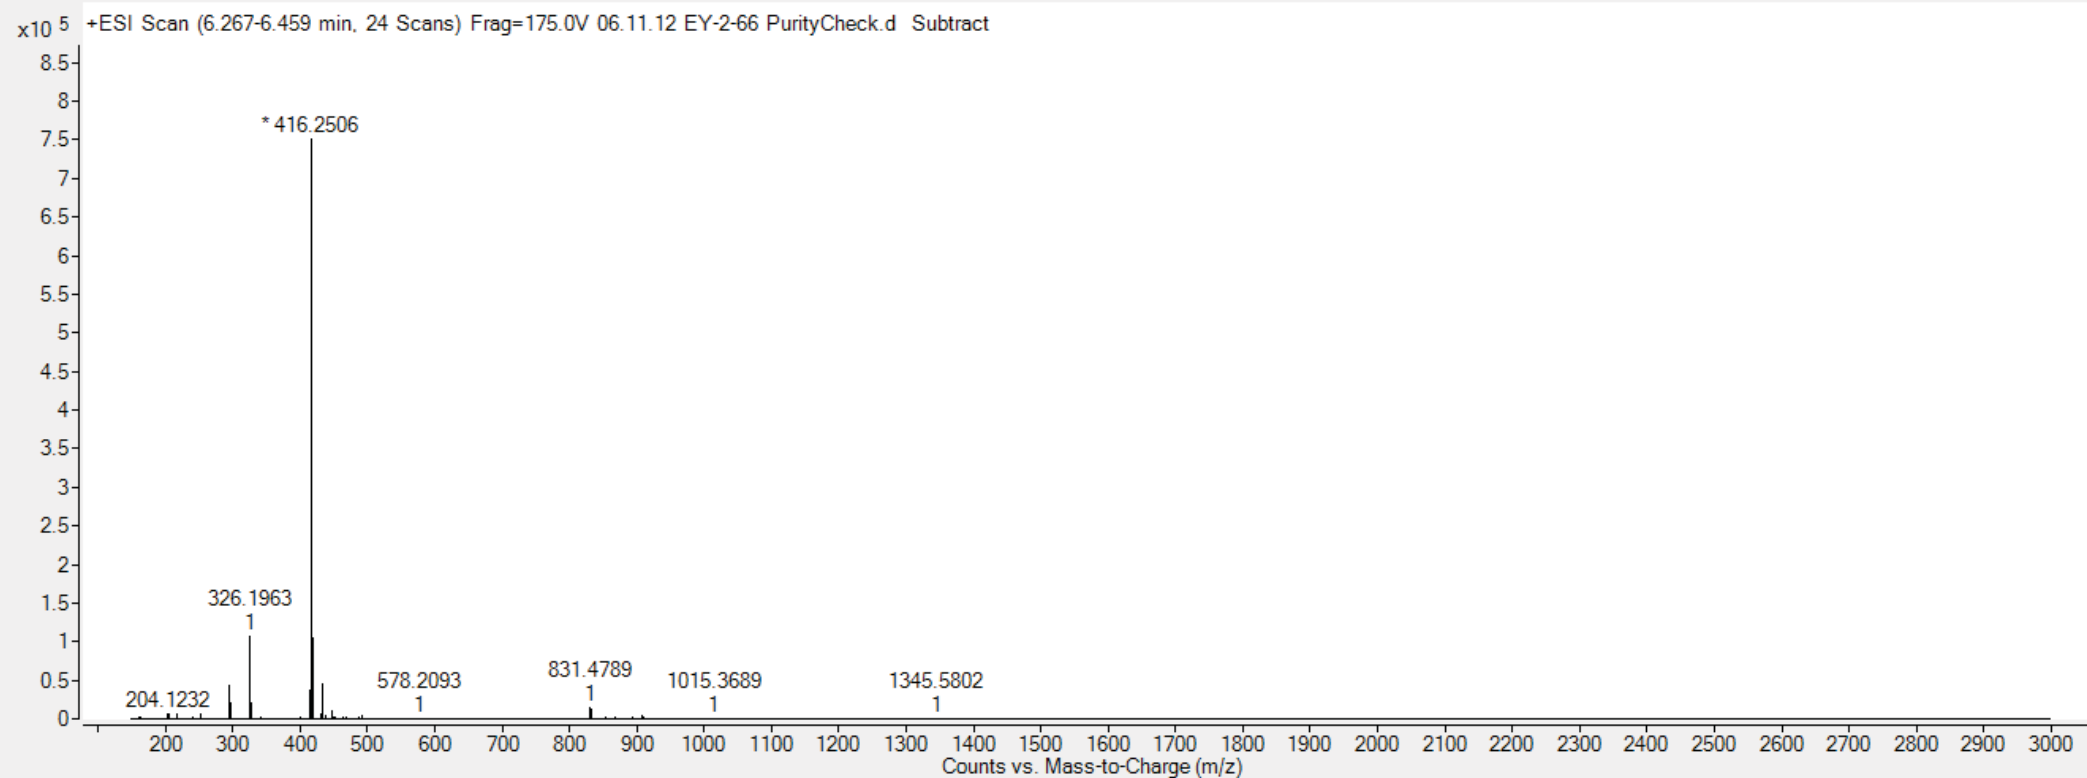

# 181 MS

|               |                      |             |                      |                 |              |                        |                      |
|---------------|----------------------|-------------|----------------------|-----------------|--------------|------------------------|----------------------|
| Sample Name   | 05.17.12 EY-2-43 tub | Position    | Vial 1               | Instrument Name | Instrument 1 | User Name              |                      |
| Inj Vol       | -1                   | InjPosition |                      | SampleType      | Sample       | IRM Calibration Status | Success              |
| Data Filename | 05.17.12 EY-2-43 tub | ACQ Method  | Water-ACN Infusion M | Comment         |              | Acquired Time          | 5/17/2012 3:27:25 PM |

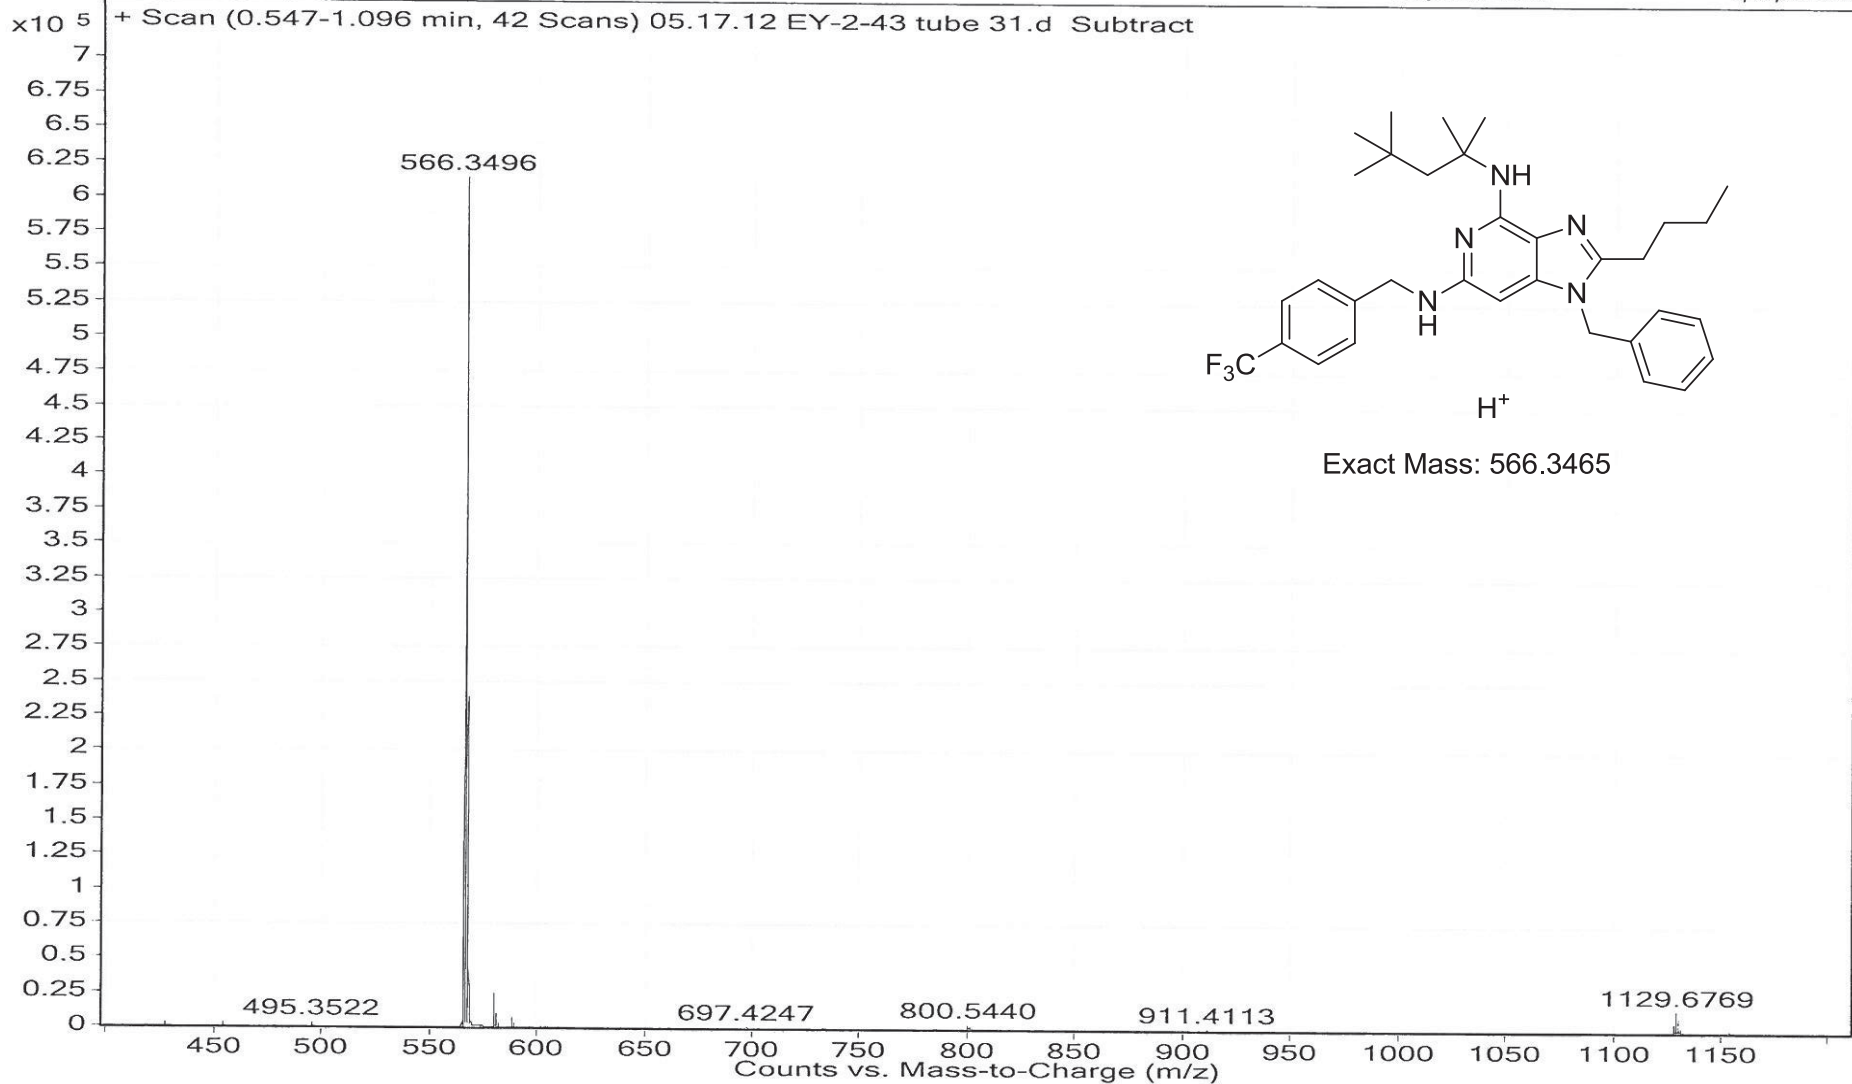



# <sup>1</sup>H NMR

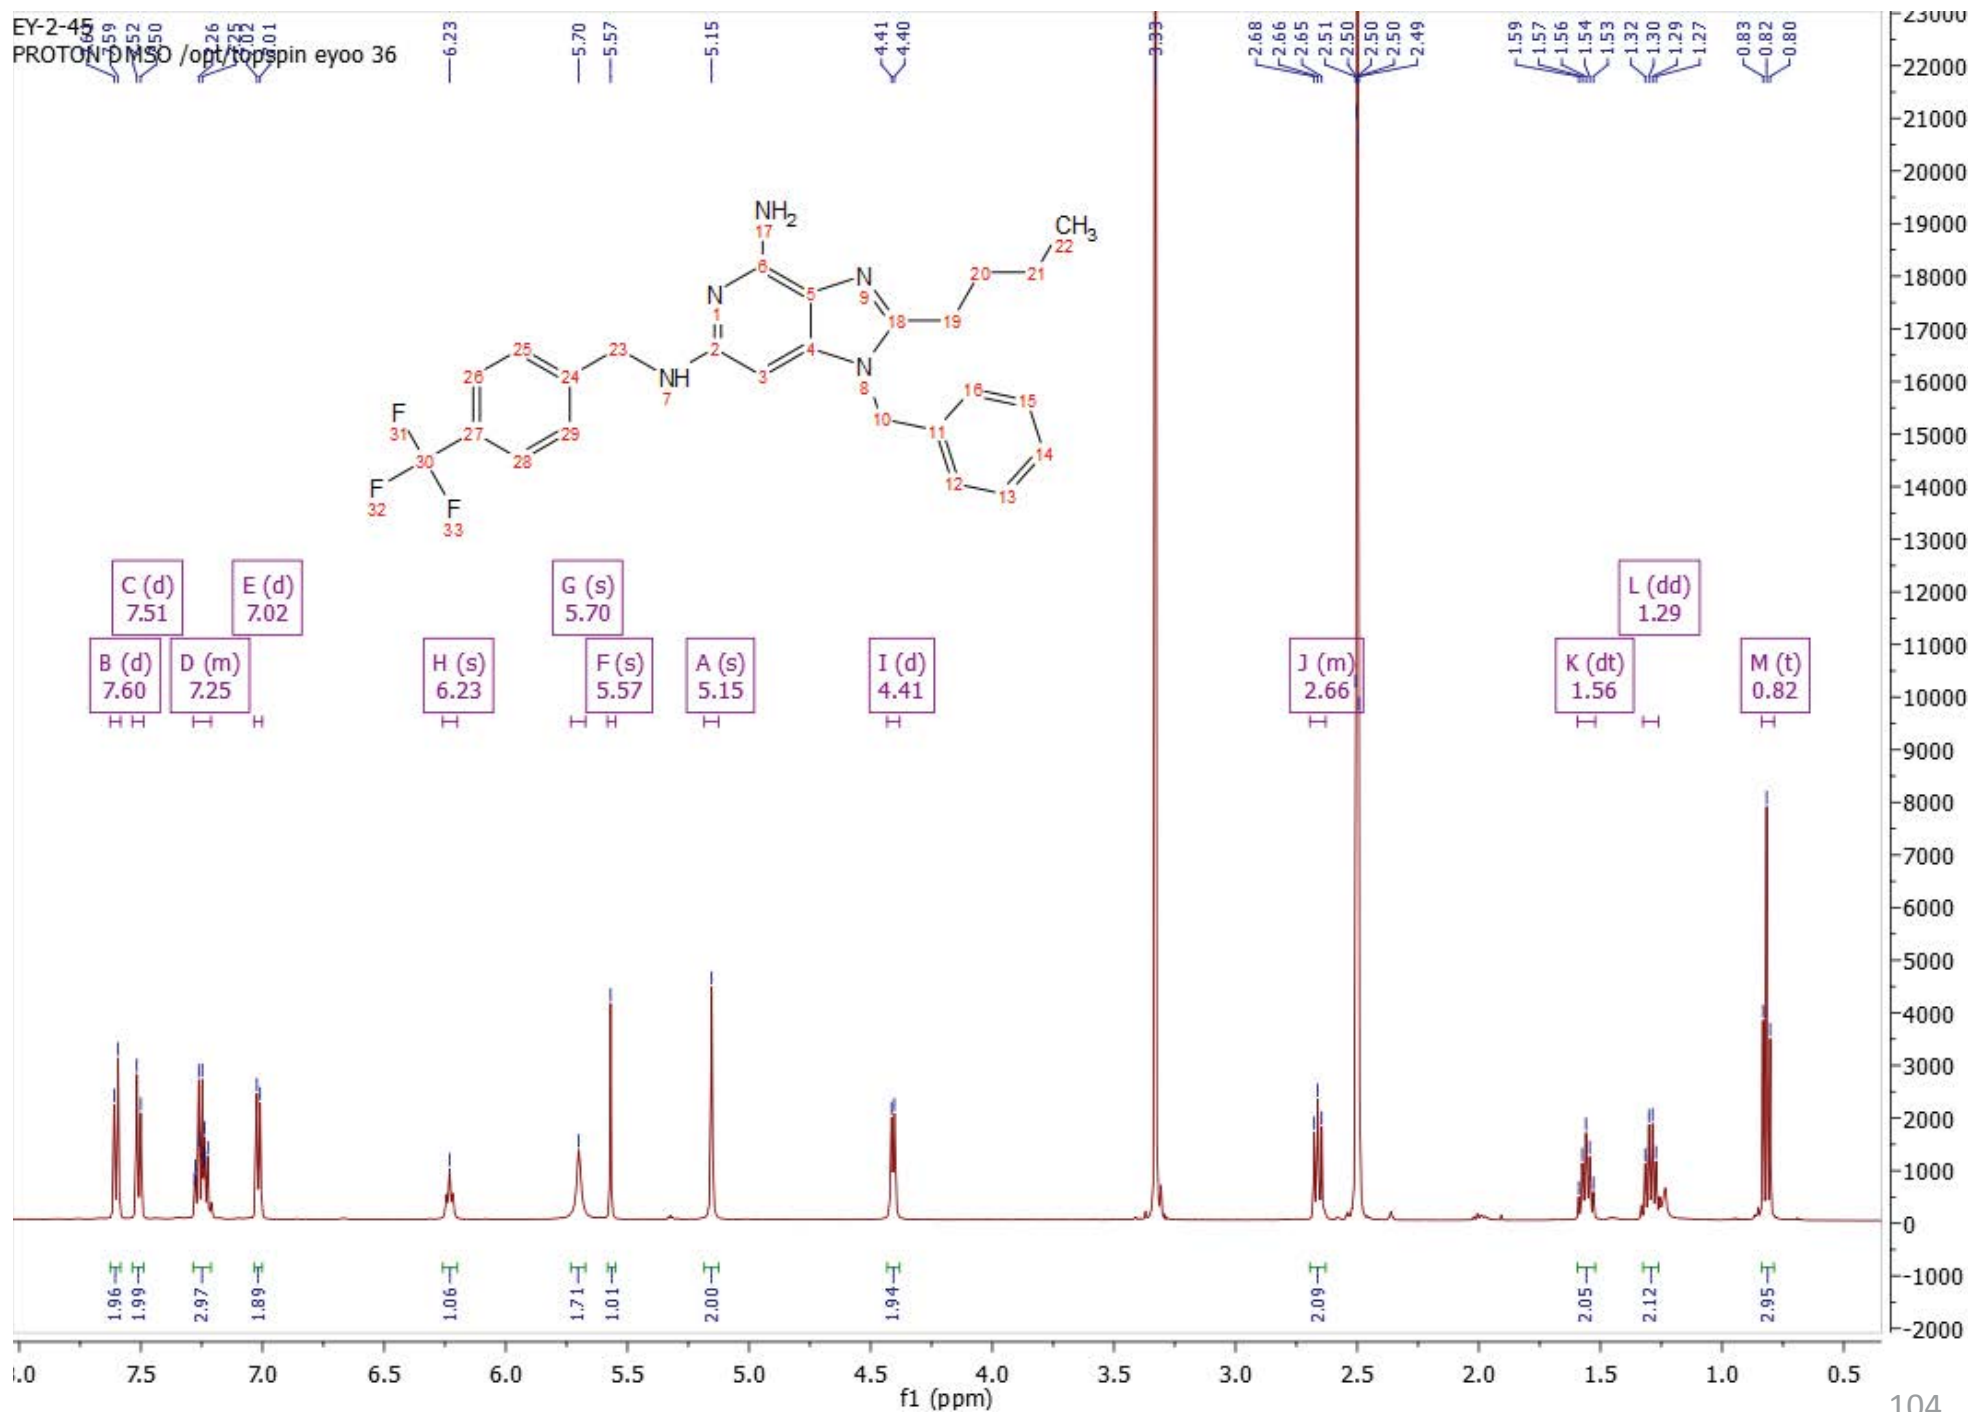

# <sup>19</sup>F and <sup>13</sup>C NMR

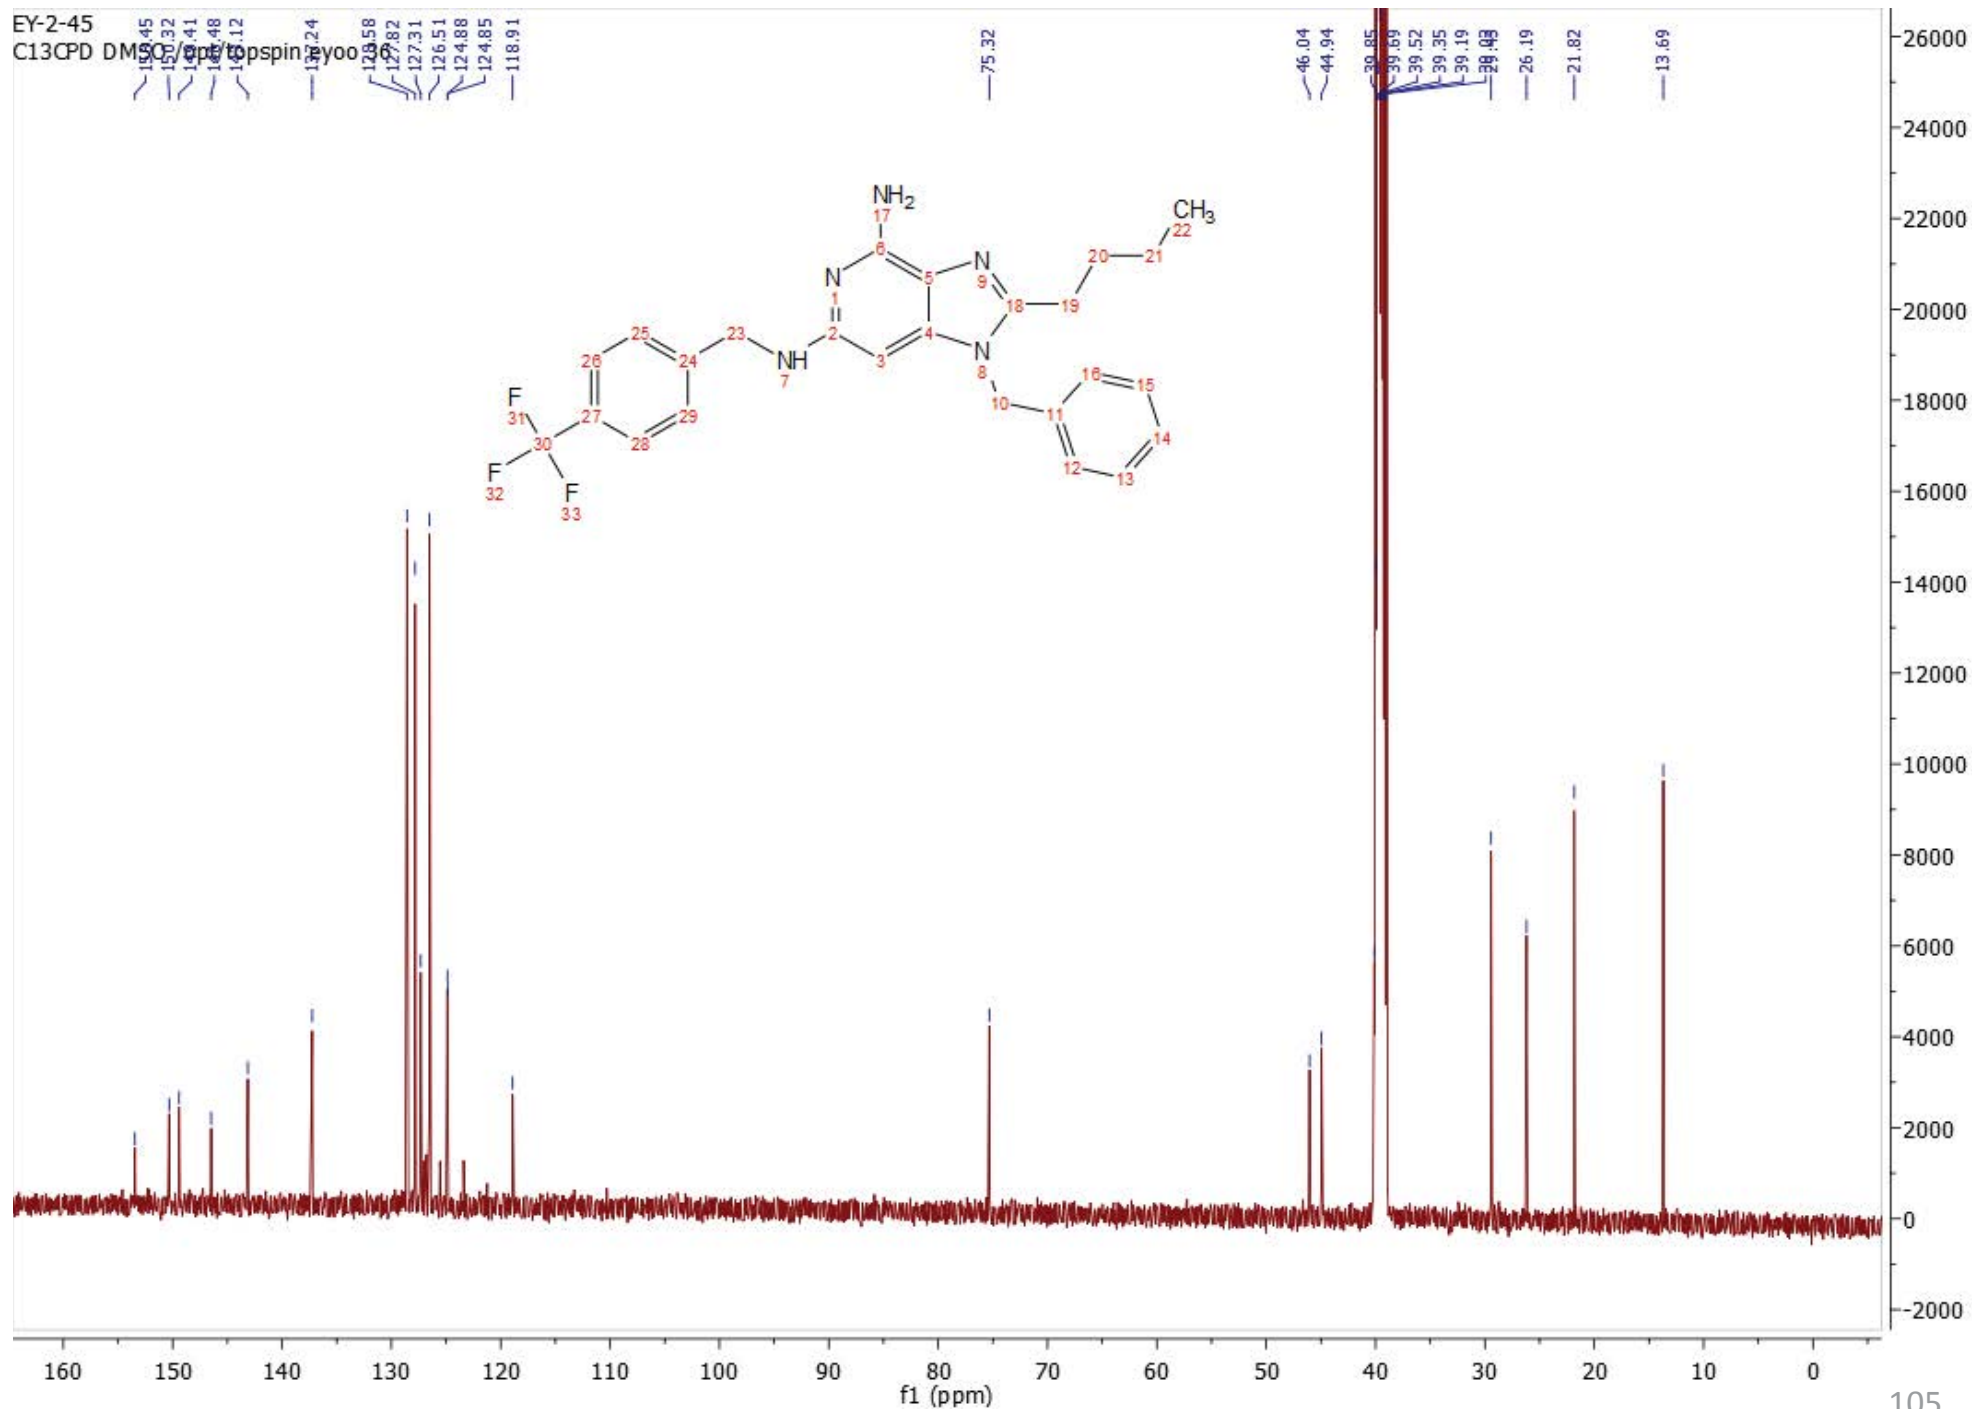

# 191 MS

|               |                      |             |                      |                 |              |                        |                       |
|---------------|----------------------|-------------|----------------------|-----------------|--------------|------------------------|-----------------------|
| Sample Name   | 05.18.12 EY-2-45 tub | Position    | Vial 1               | Instrument Name | Instrument 1 | User Name              |                       |
| Inj Vol       | -1                   | InjPosition |                      | SampleType      | Sample       | IRM Calibration Status | Success               |
| Data Filename | 05.18.12 EY-2-45 tub | ACQ Method  | Water-ACN Infusion M | Comment         |              | Acquired Time          | 5/18/2012 12:32:16 PM |

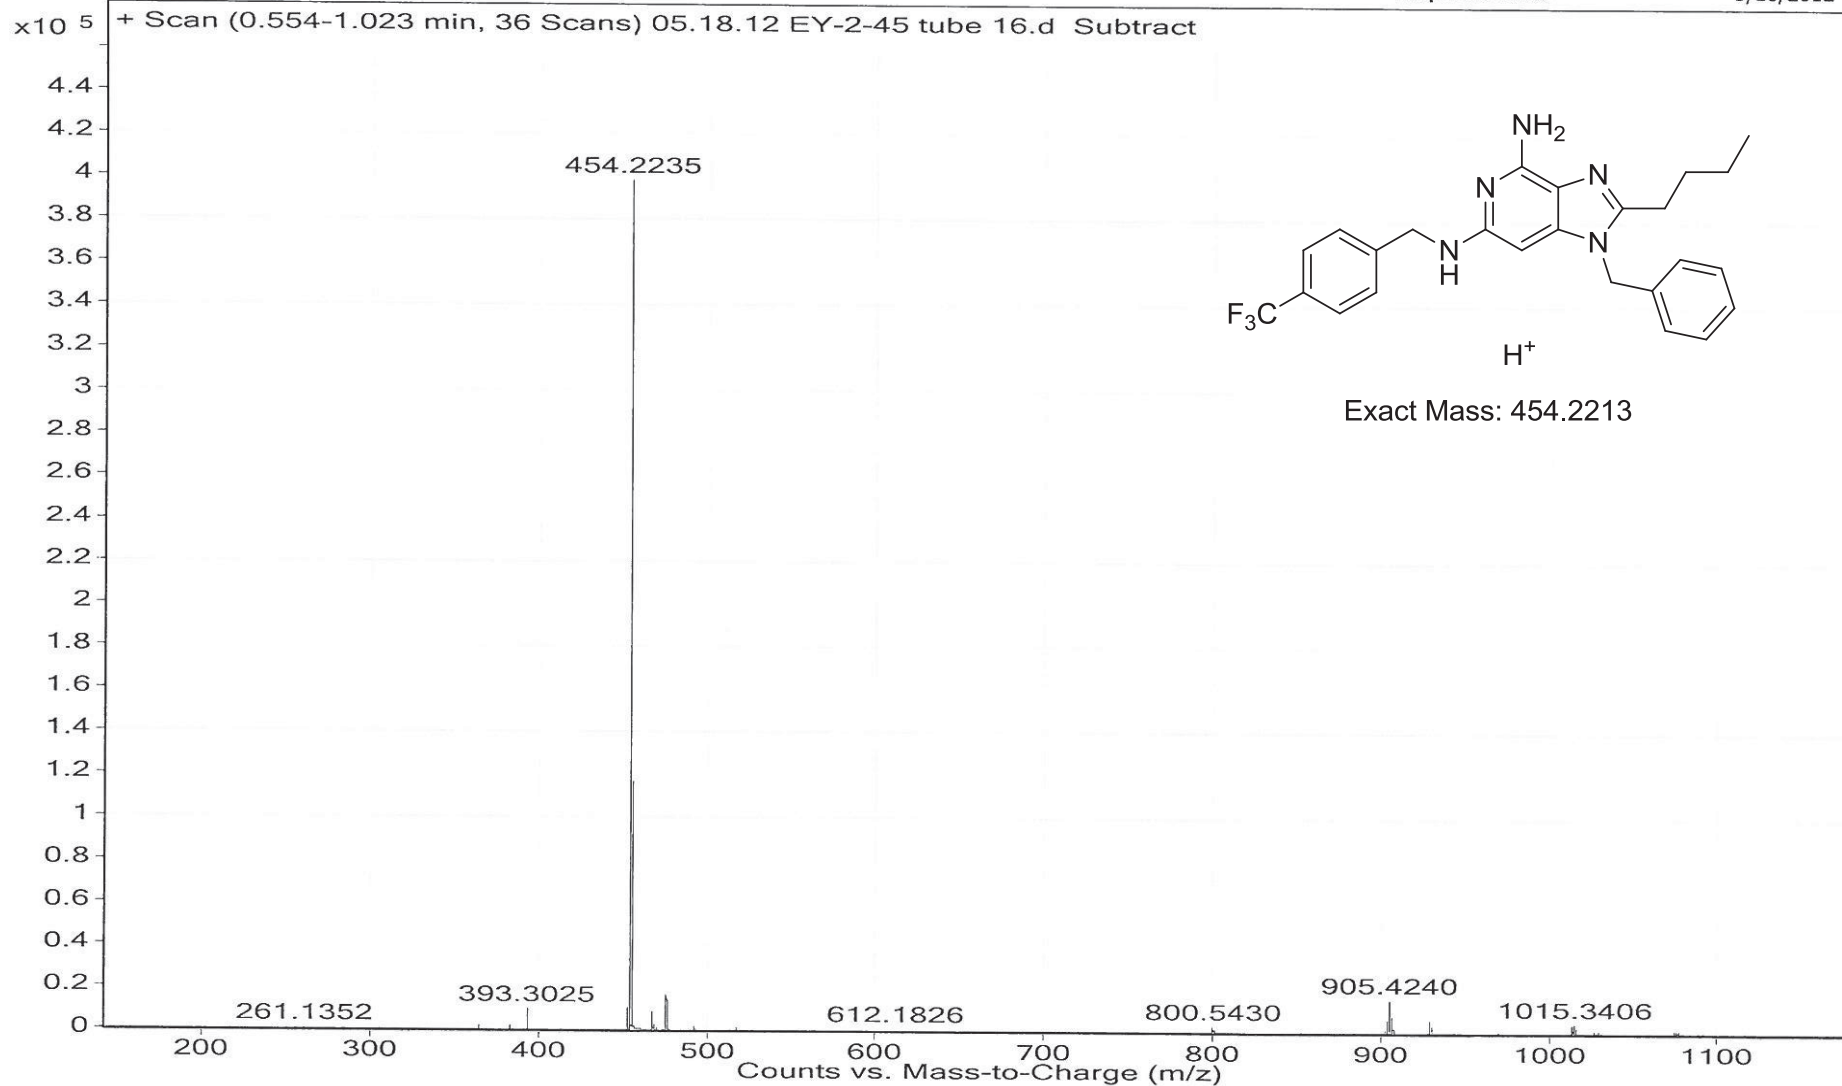

# 19i LC-MS

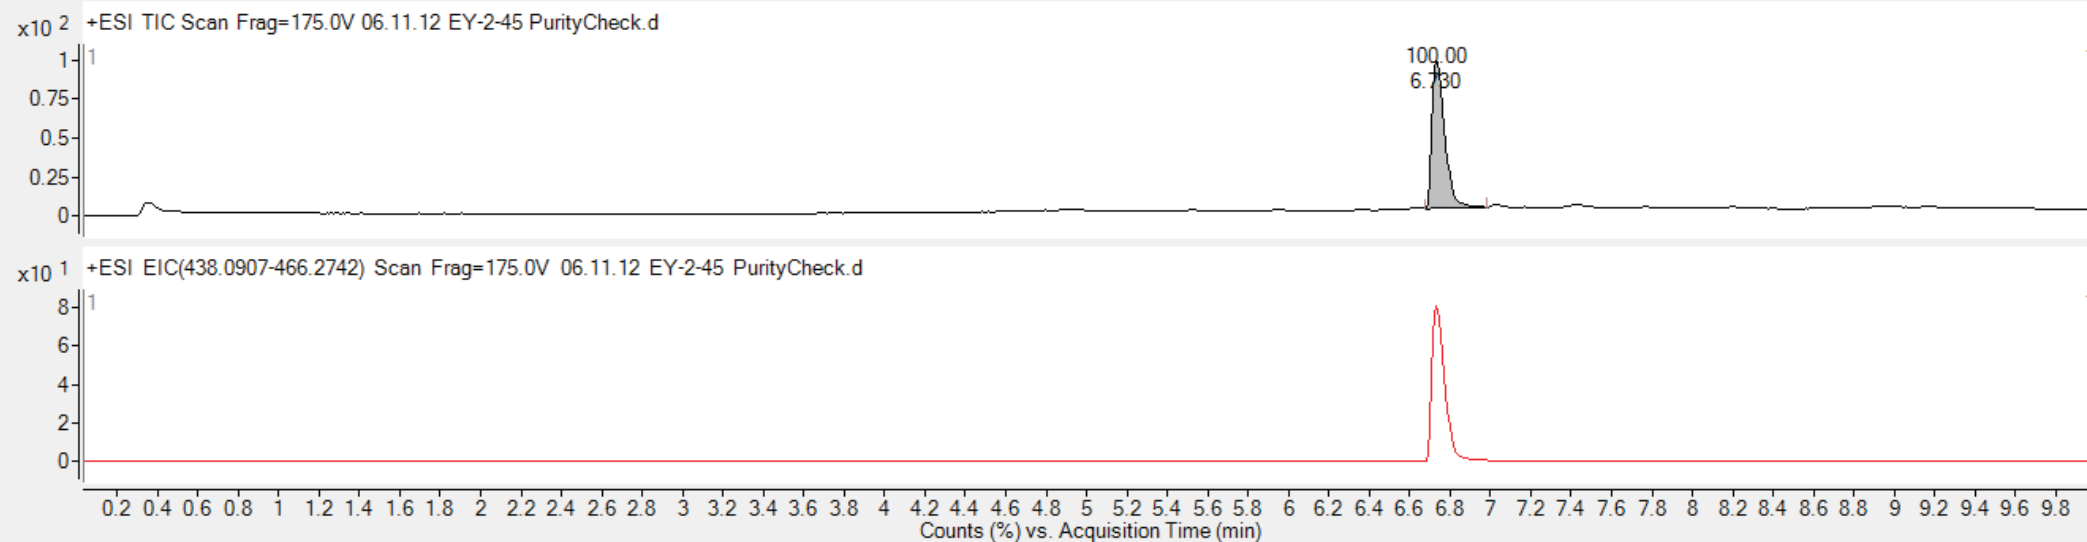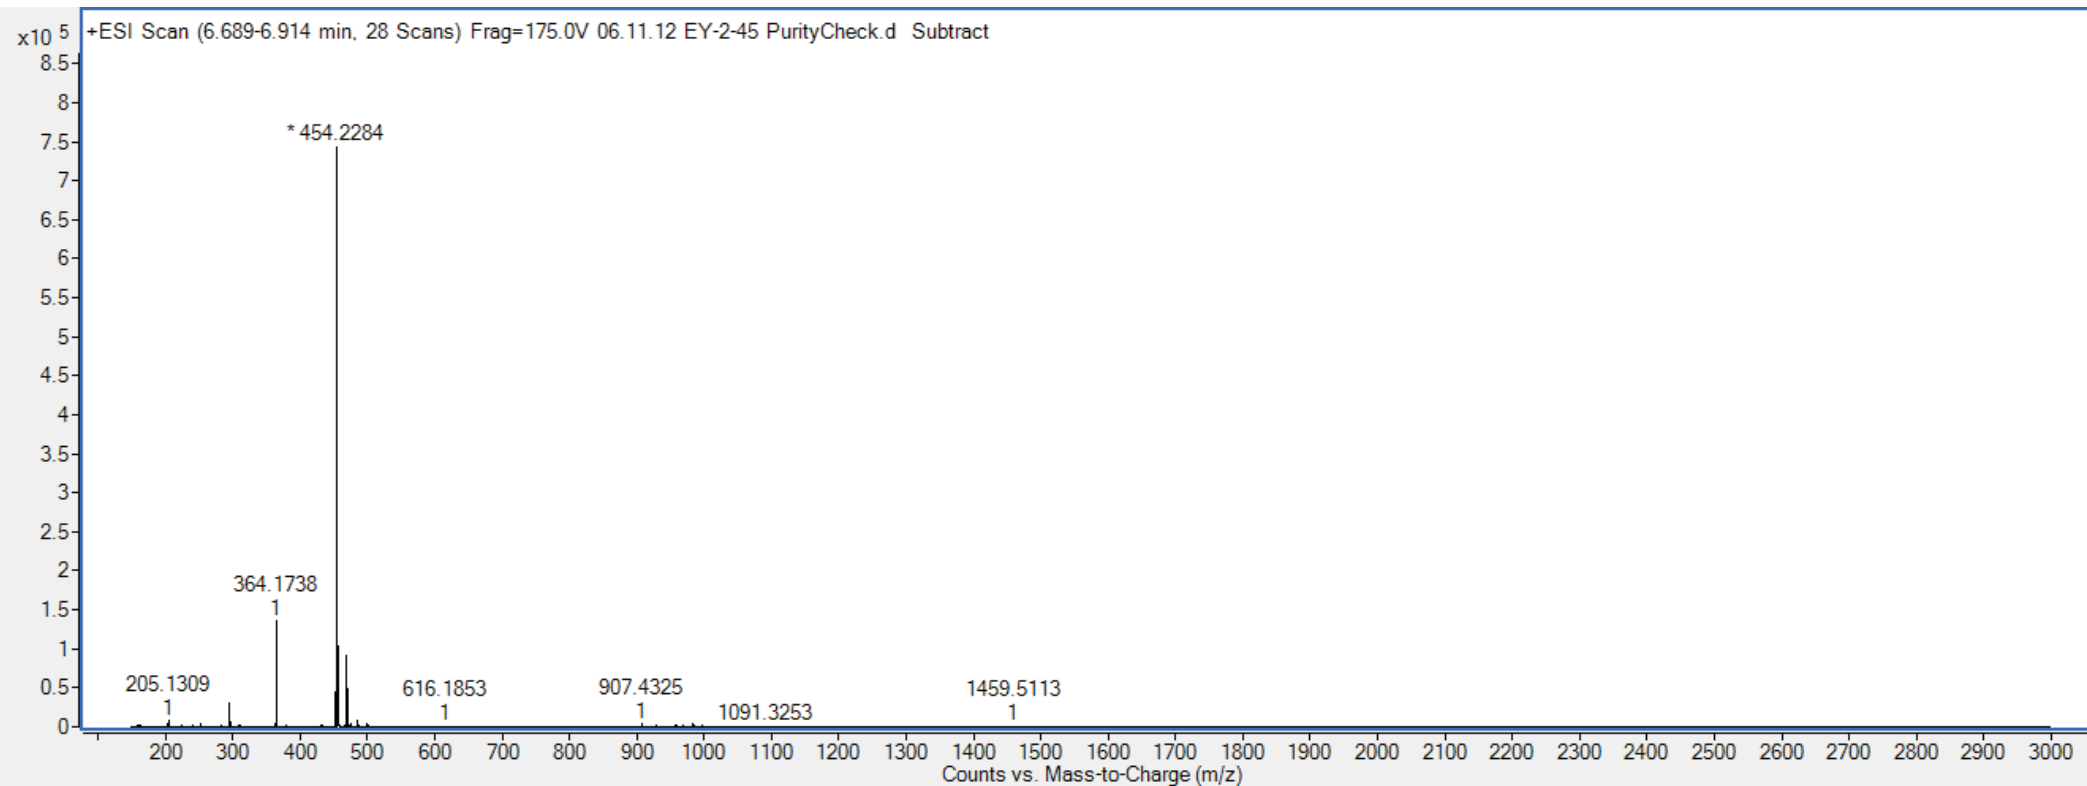

18j MS

|               |                    |             |                      |                 |              |                        |                      |
|---------------|--------------------|-------------|----------------------|-----------------|--------------|------------------------|----------------------|
| Sample Name   | 05.29.12 EY-2-62   | Position    | Vial 1               | Instrument Name | Instrument 1 | User Name              |                      |
| Inj Vol       | -1                 | InjPosition |                      | SampleType      | Sample       | IRM Calibration Status | Success              |
| Data Filename | 05.29.12 EY-2-62.d | ACQ Method  | Water-ACN Infusion M | Comment         |              | Acquired Time          | 5/29/2012 3:13:18 PM |

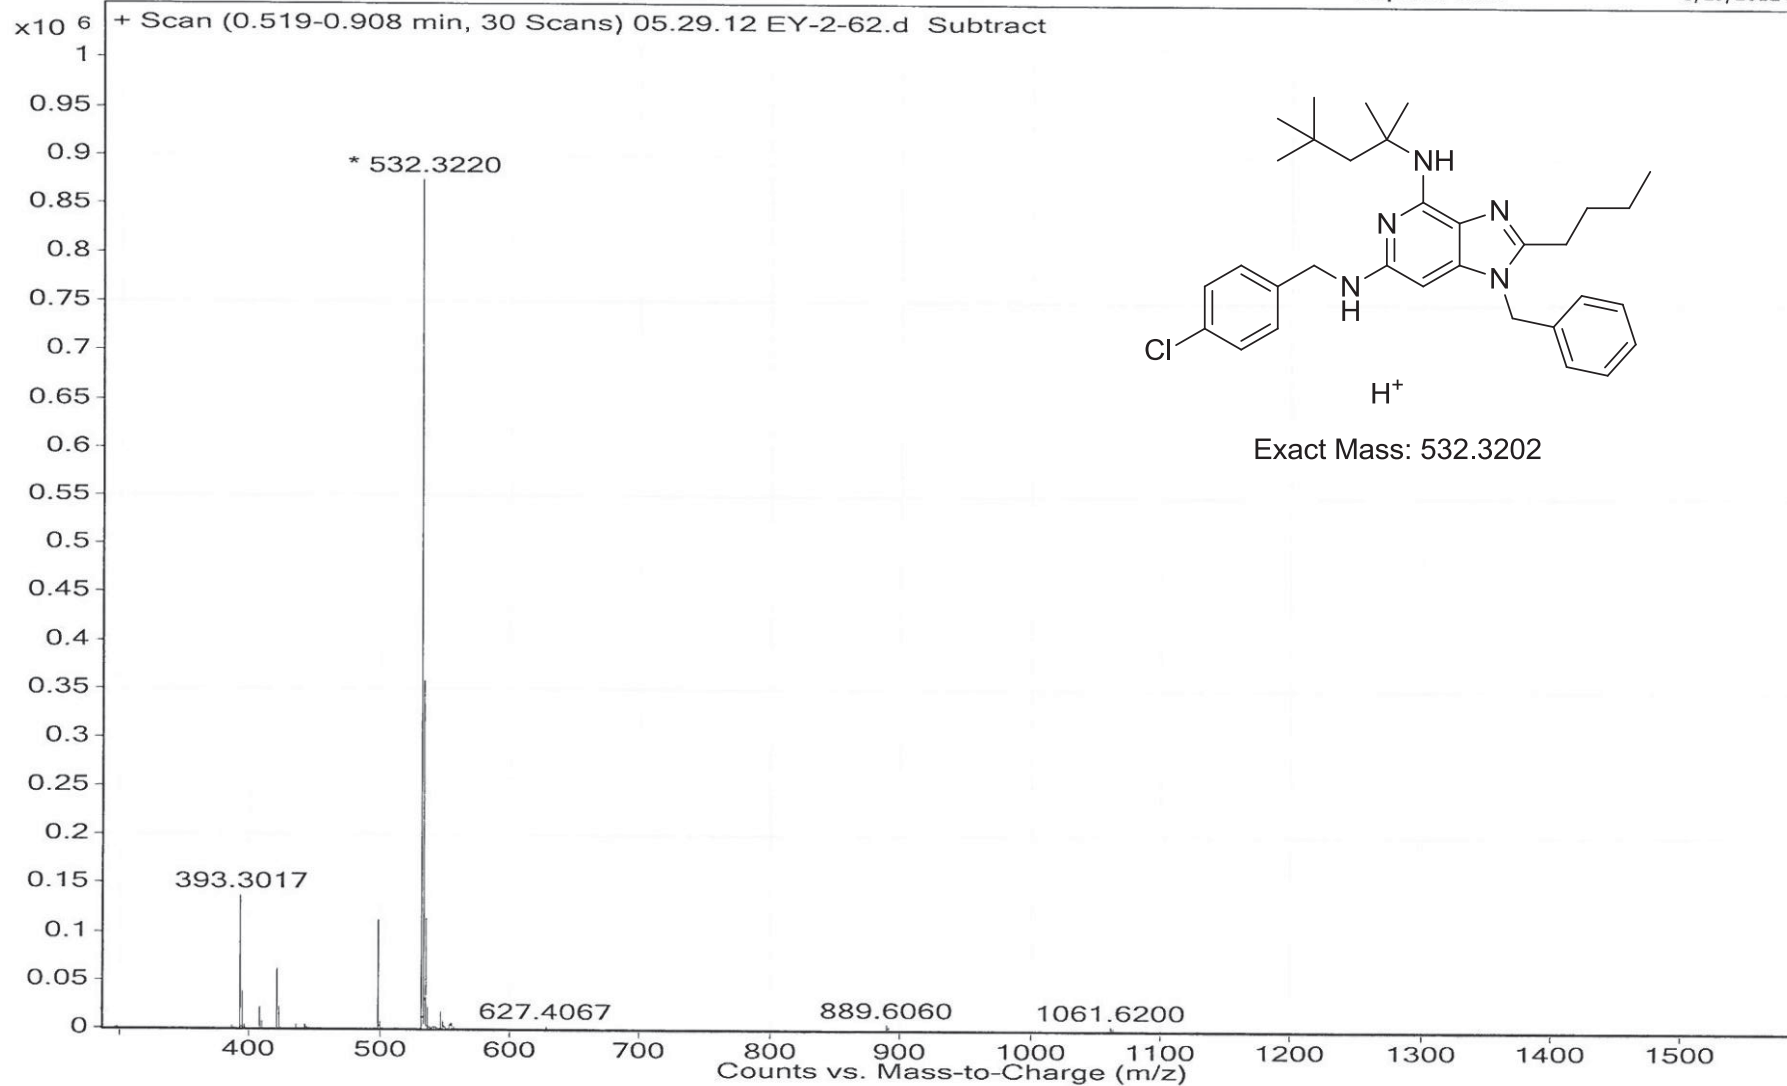

# 19j <sup>1</sup>H NMR

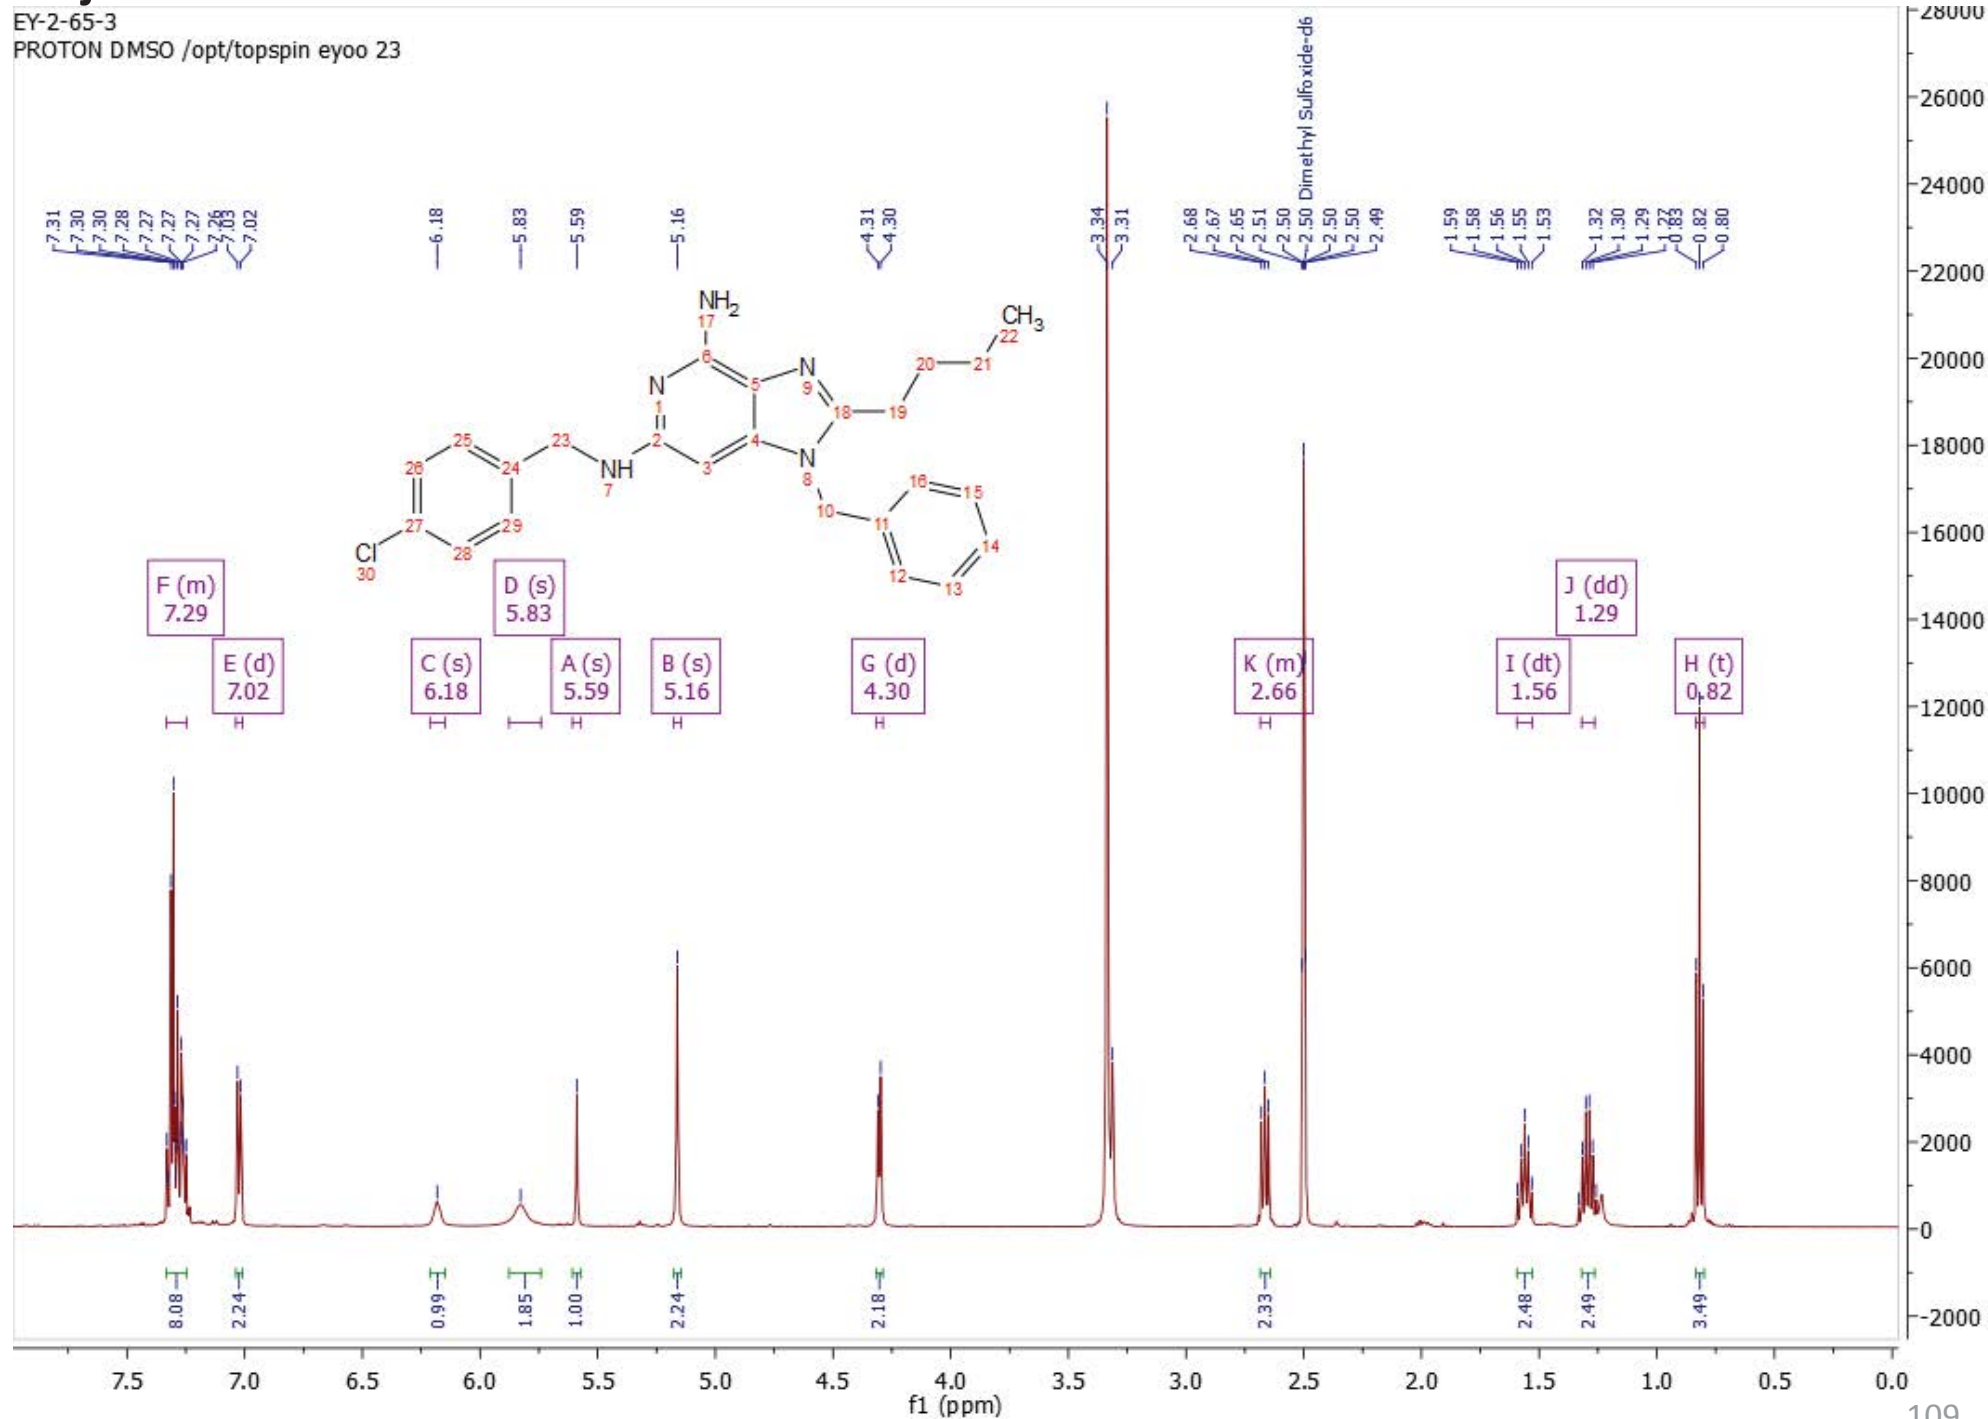



# 19j <sup>13</sup>C NMR

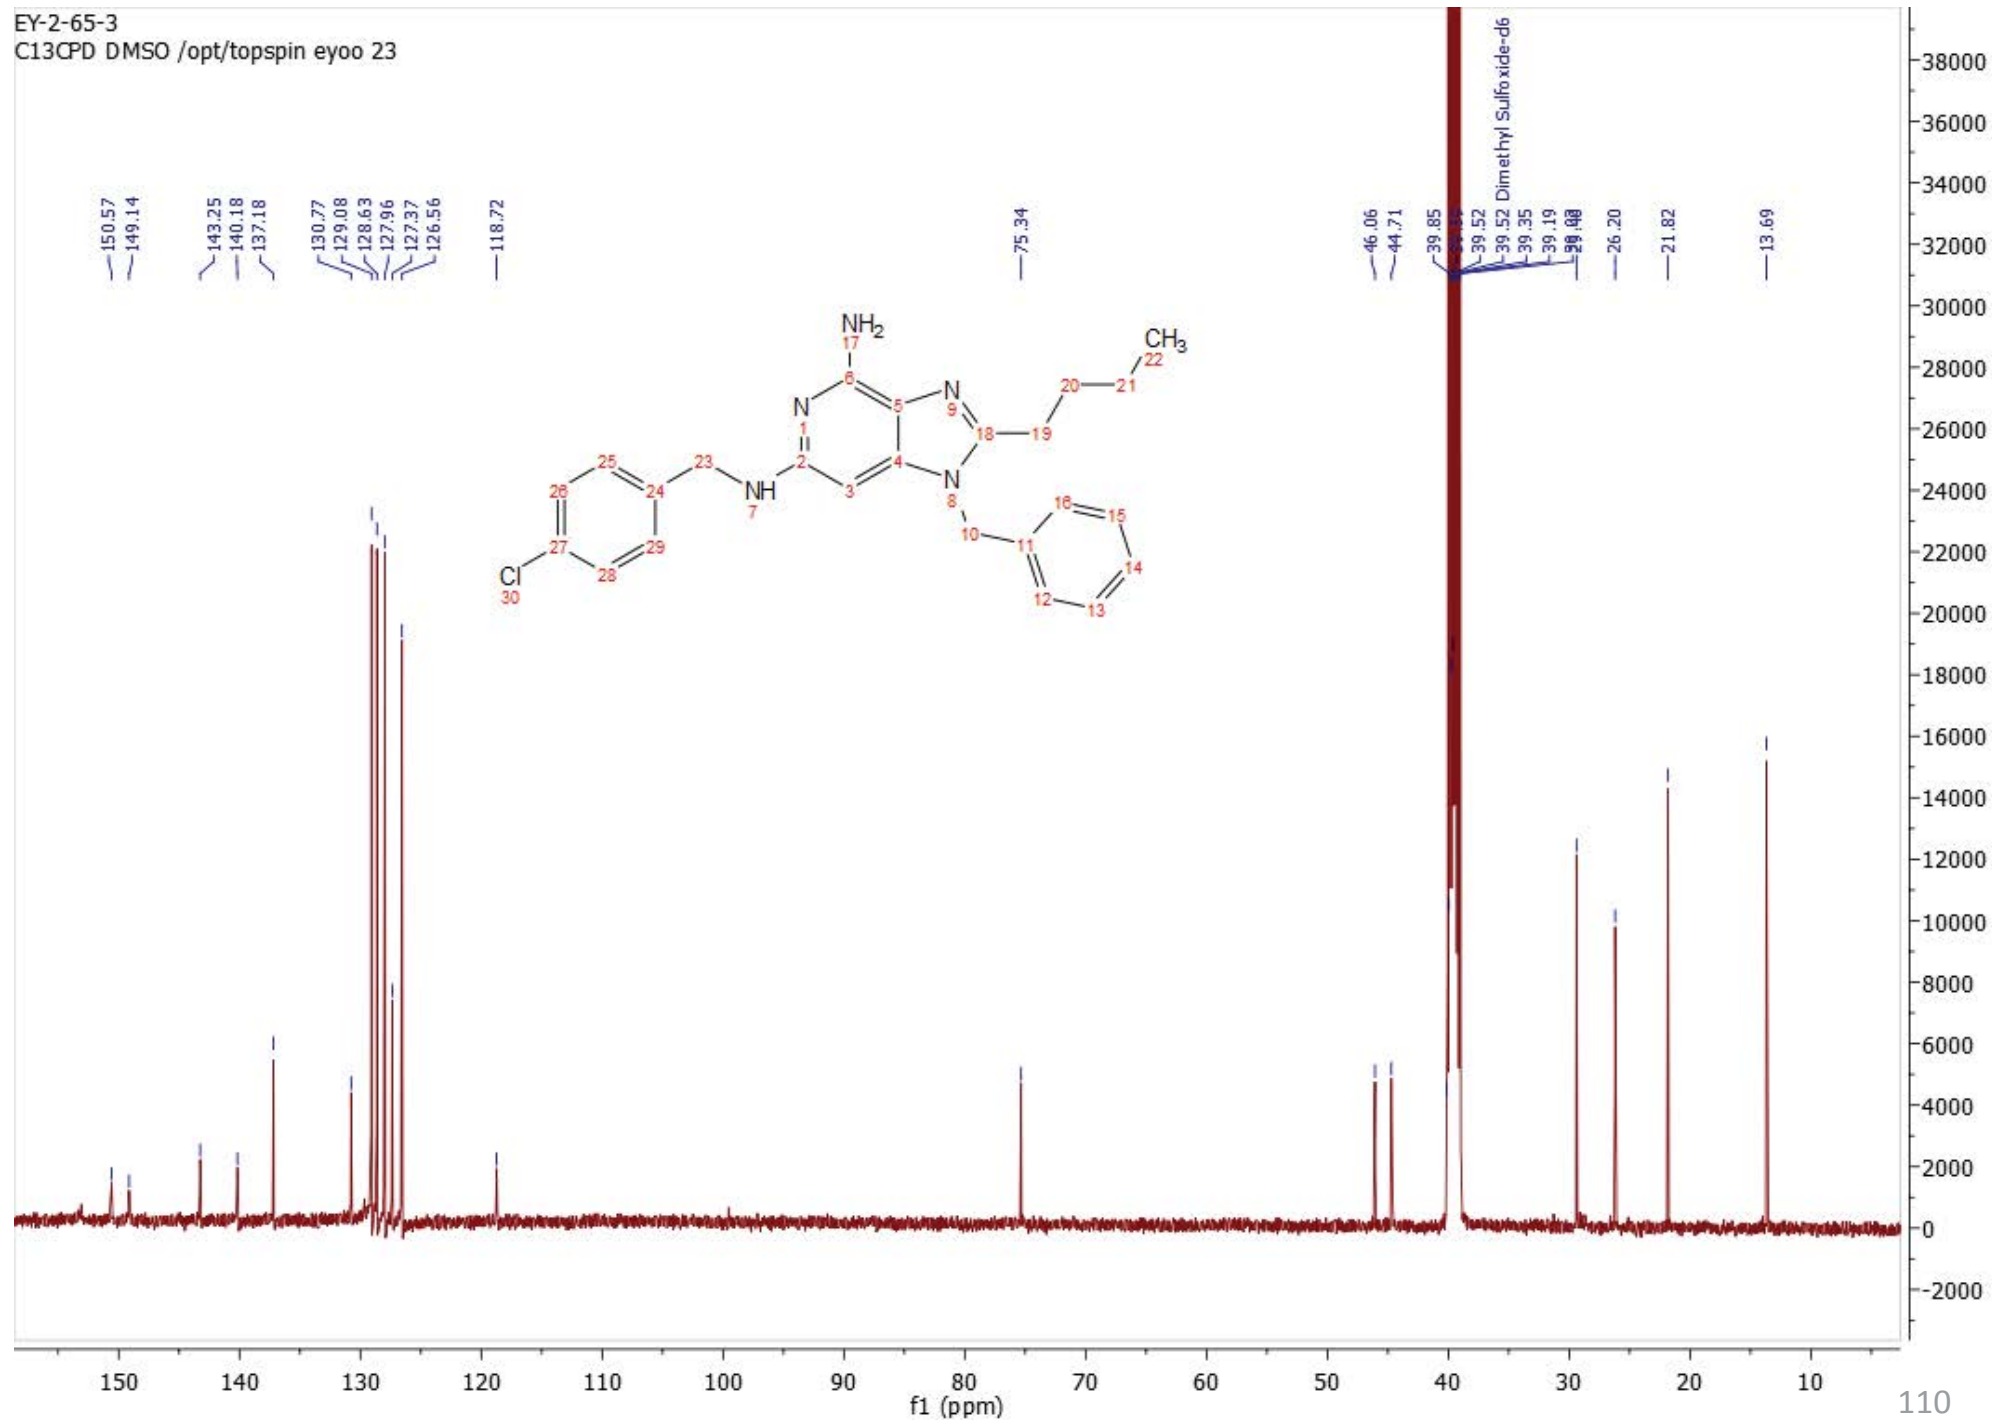



# 19j MS

|               |                      |             |                      |                 |              |                        |                      |
|---------------|----------------------|-------------|----------------------|-----------------|--------------|------------------------|----------------------|
| Sample Name   | 05.30.12 EY-2-65 tub | Position    | Vial 1               | Instrument Name | Instrument 1 | User Name              |                      |
| Inj Vol       | -1                   | InjPosition |                      | SampleType      | Sample       | IRM Calibration Status | Success              |
| Data Filename | 05.30.12 EY-2-65 tub | ACQ Method  | Water-ACN Infusion M | Comment         |              | Acquired Time          | 5/30/2012 3:59:17 PM |

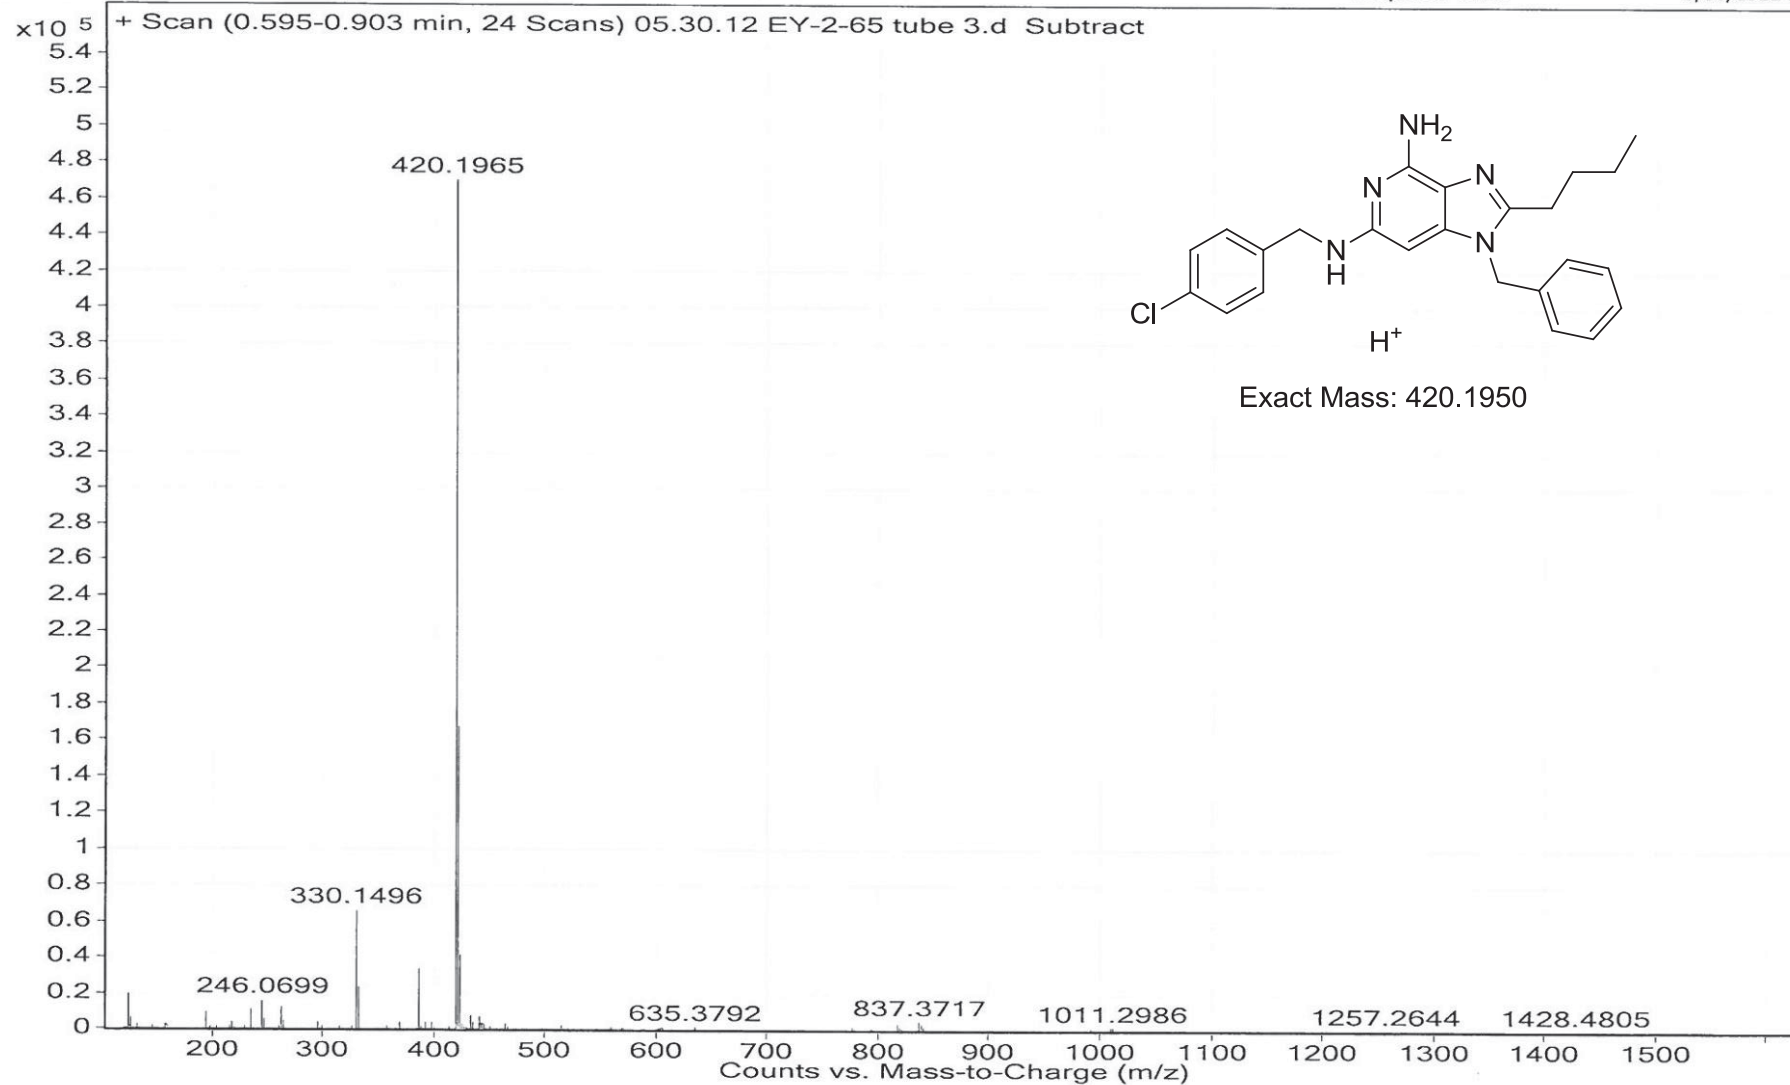

# 19j LC-MS

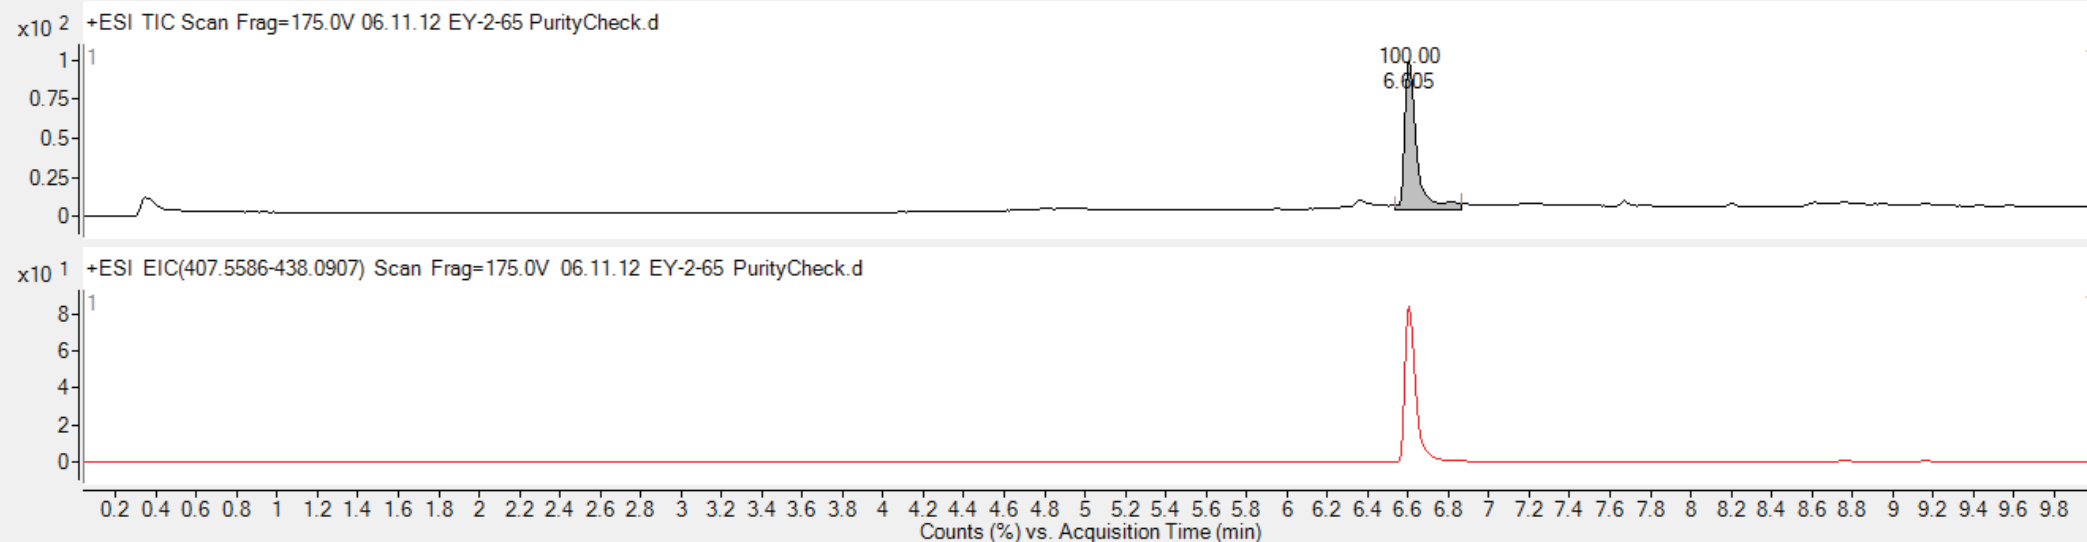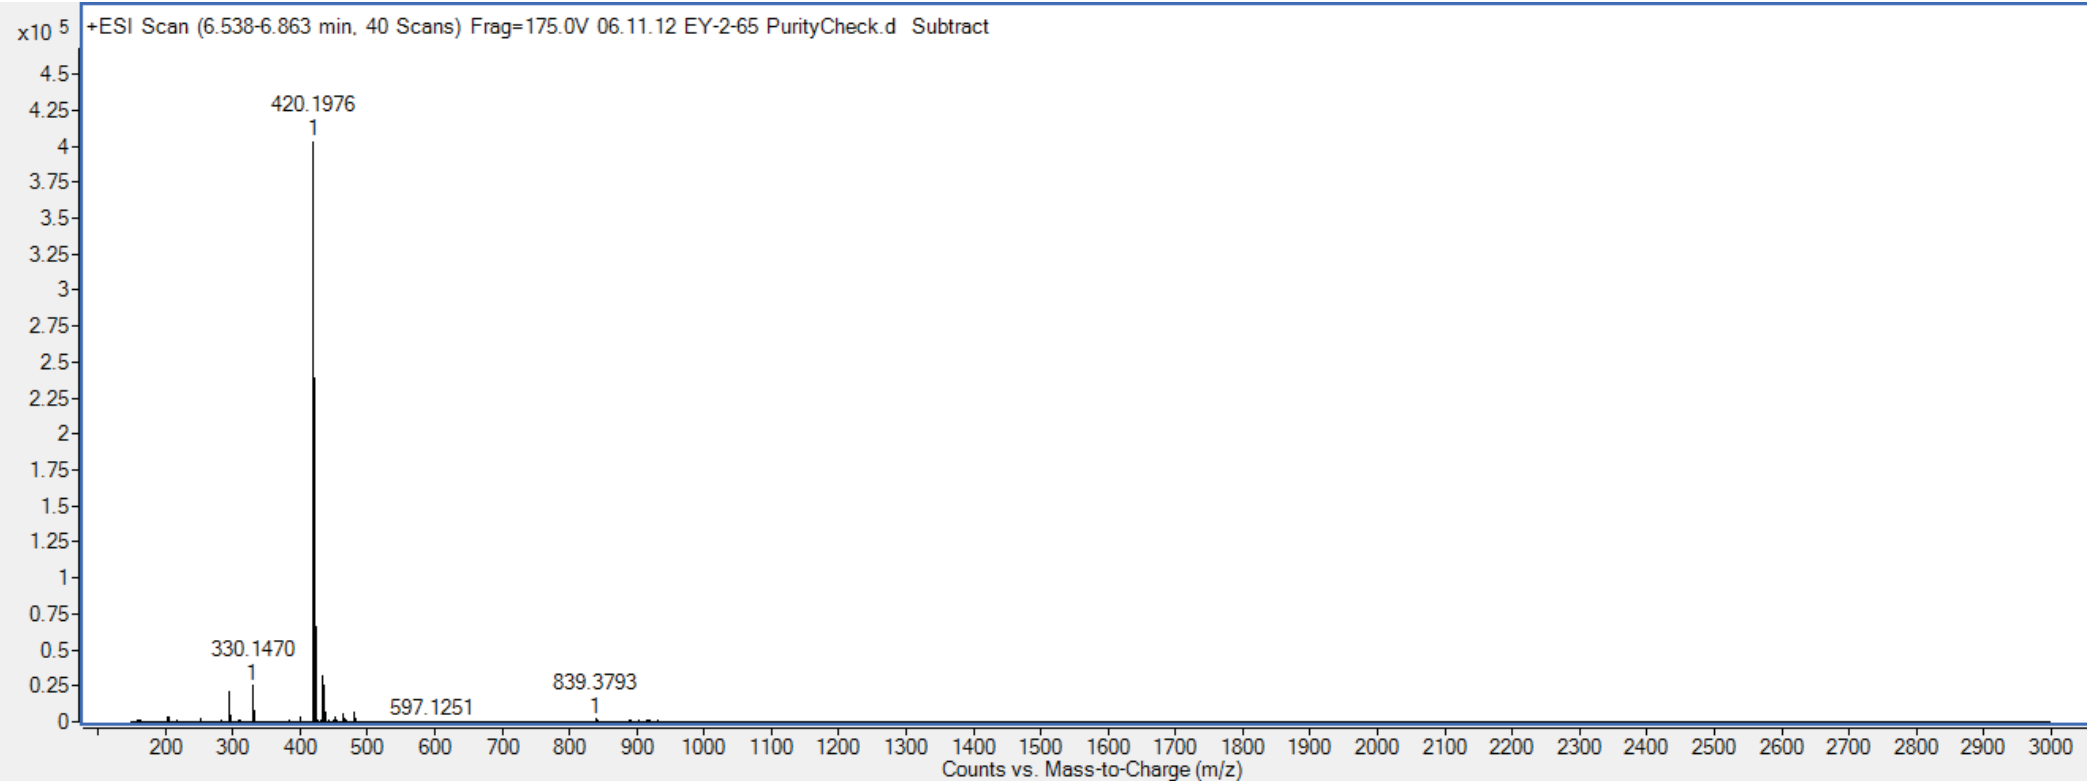

# 18k <sup>1</sup>H NMR

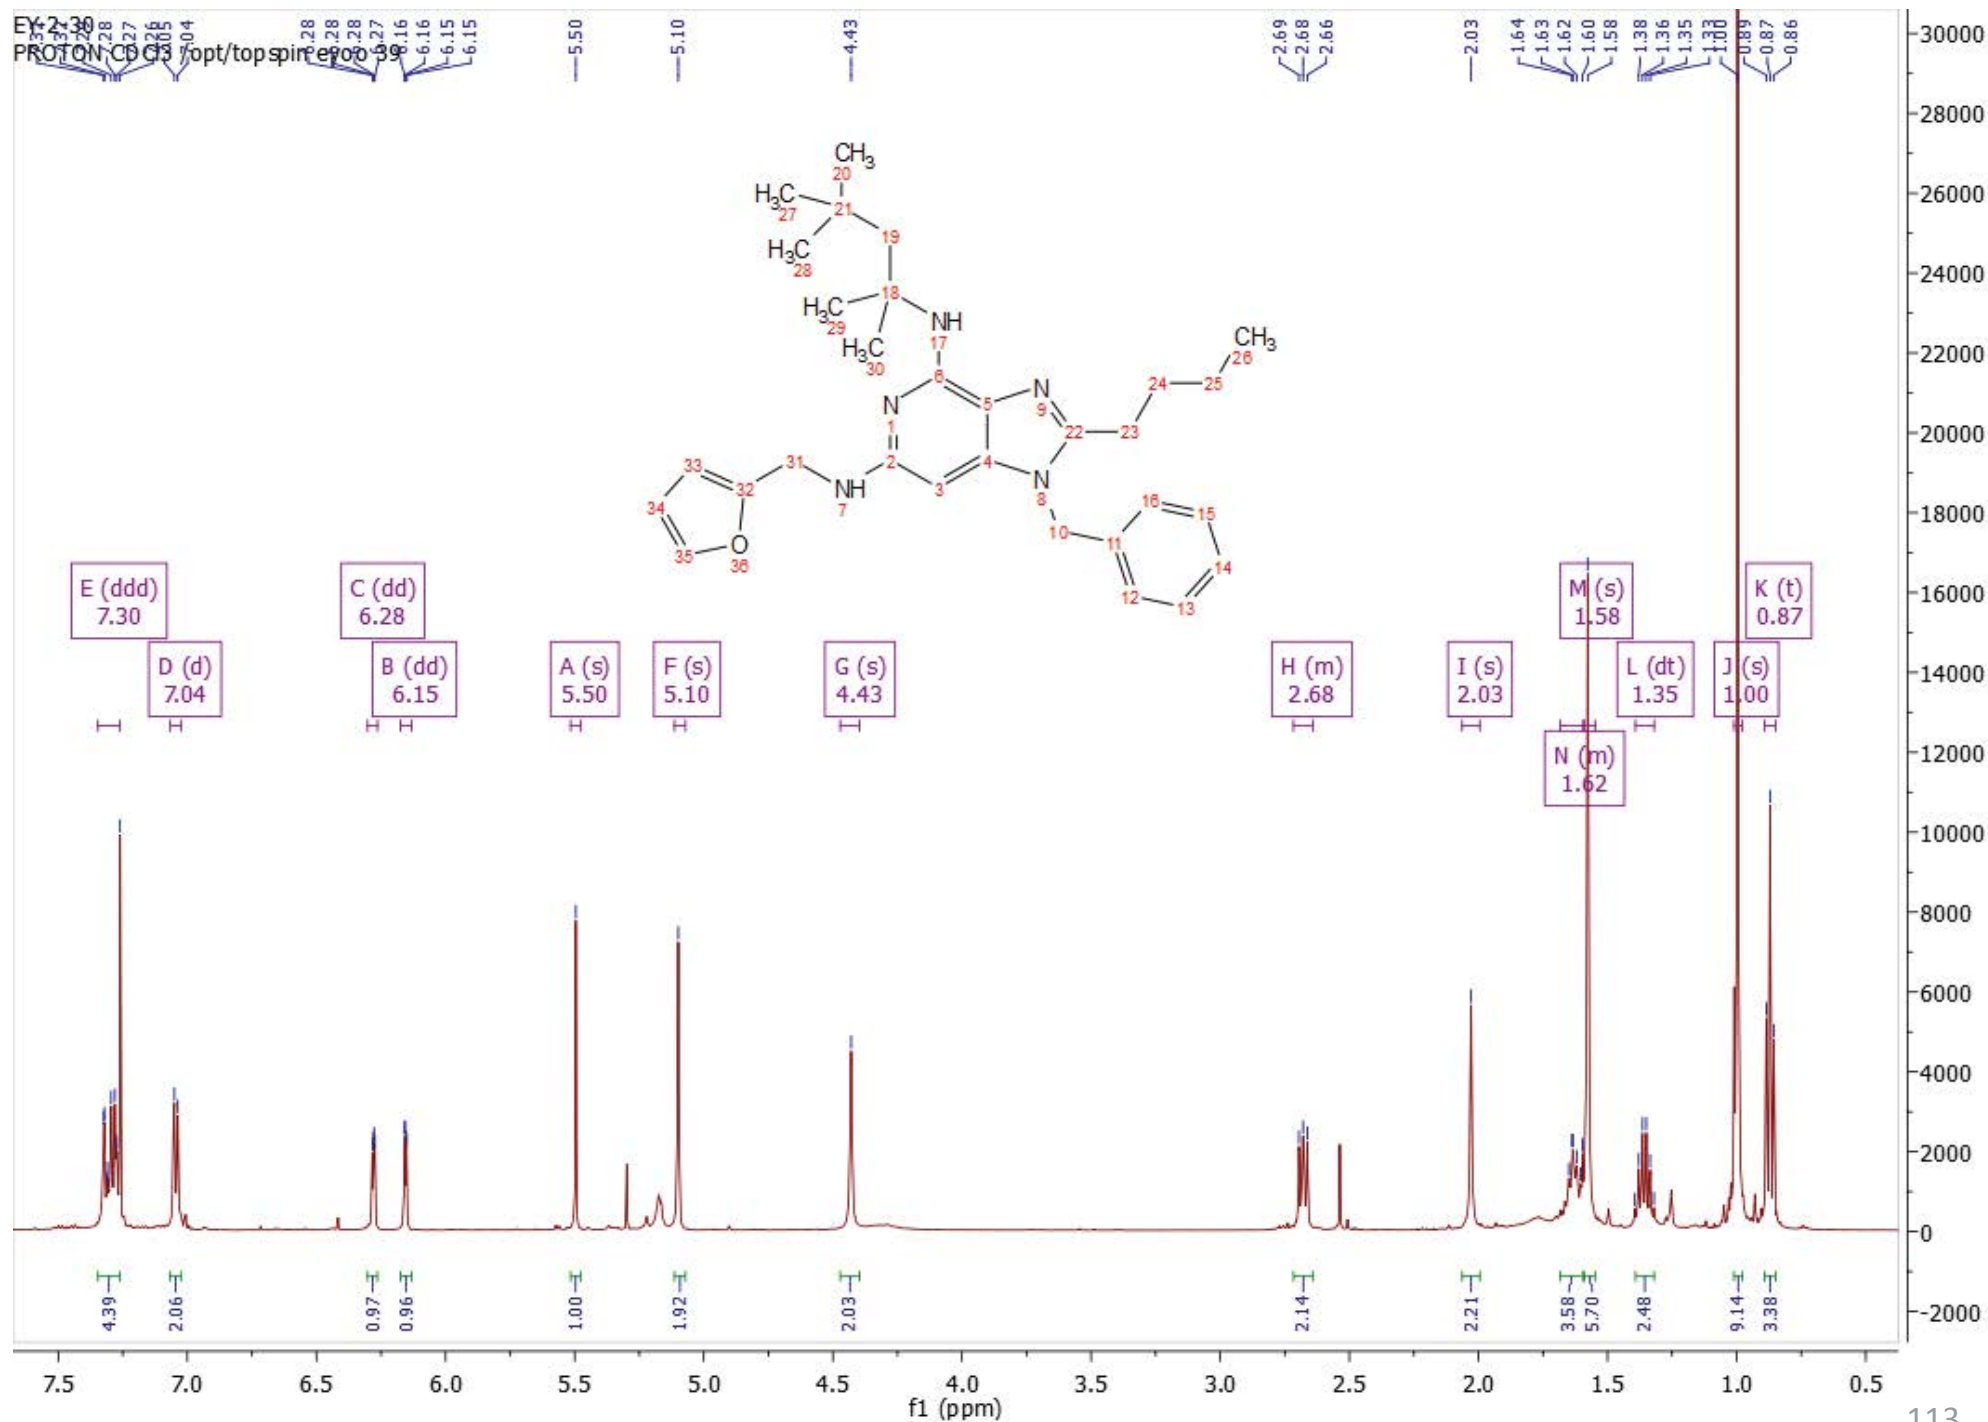

# 18k <sup>13</sup>C NMR

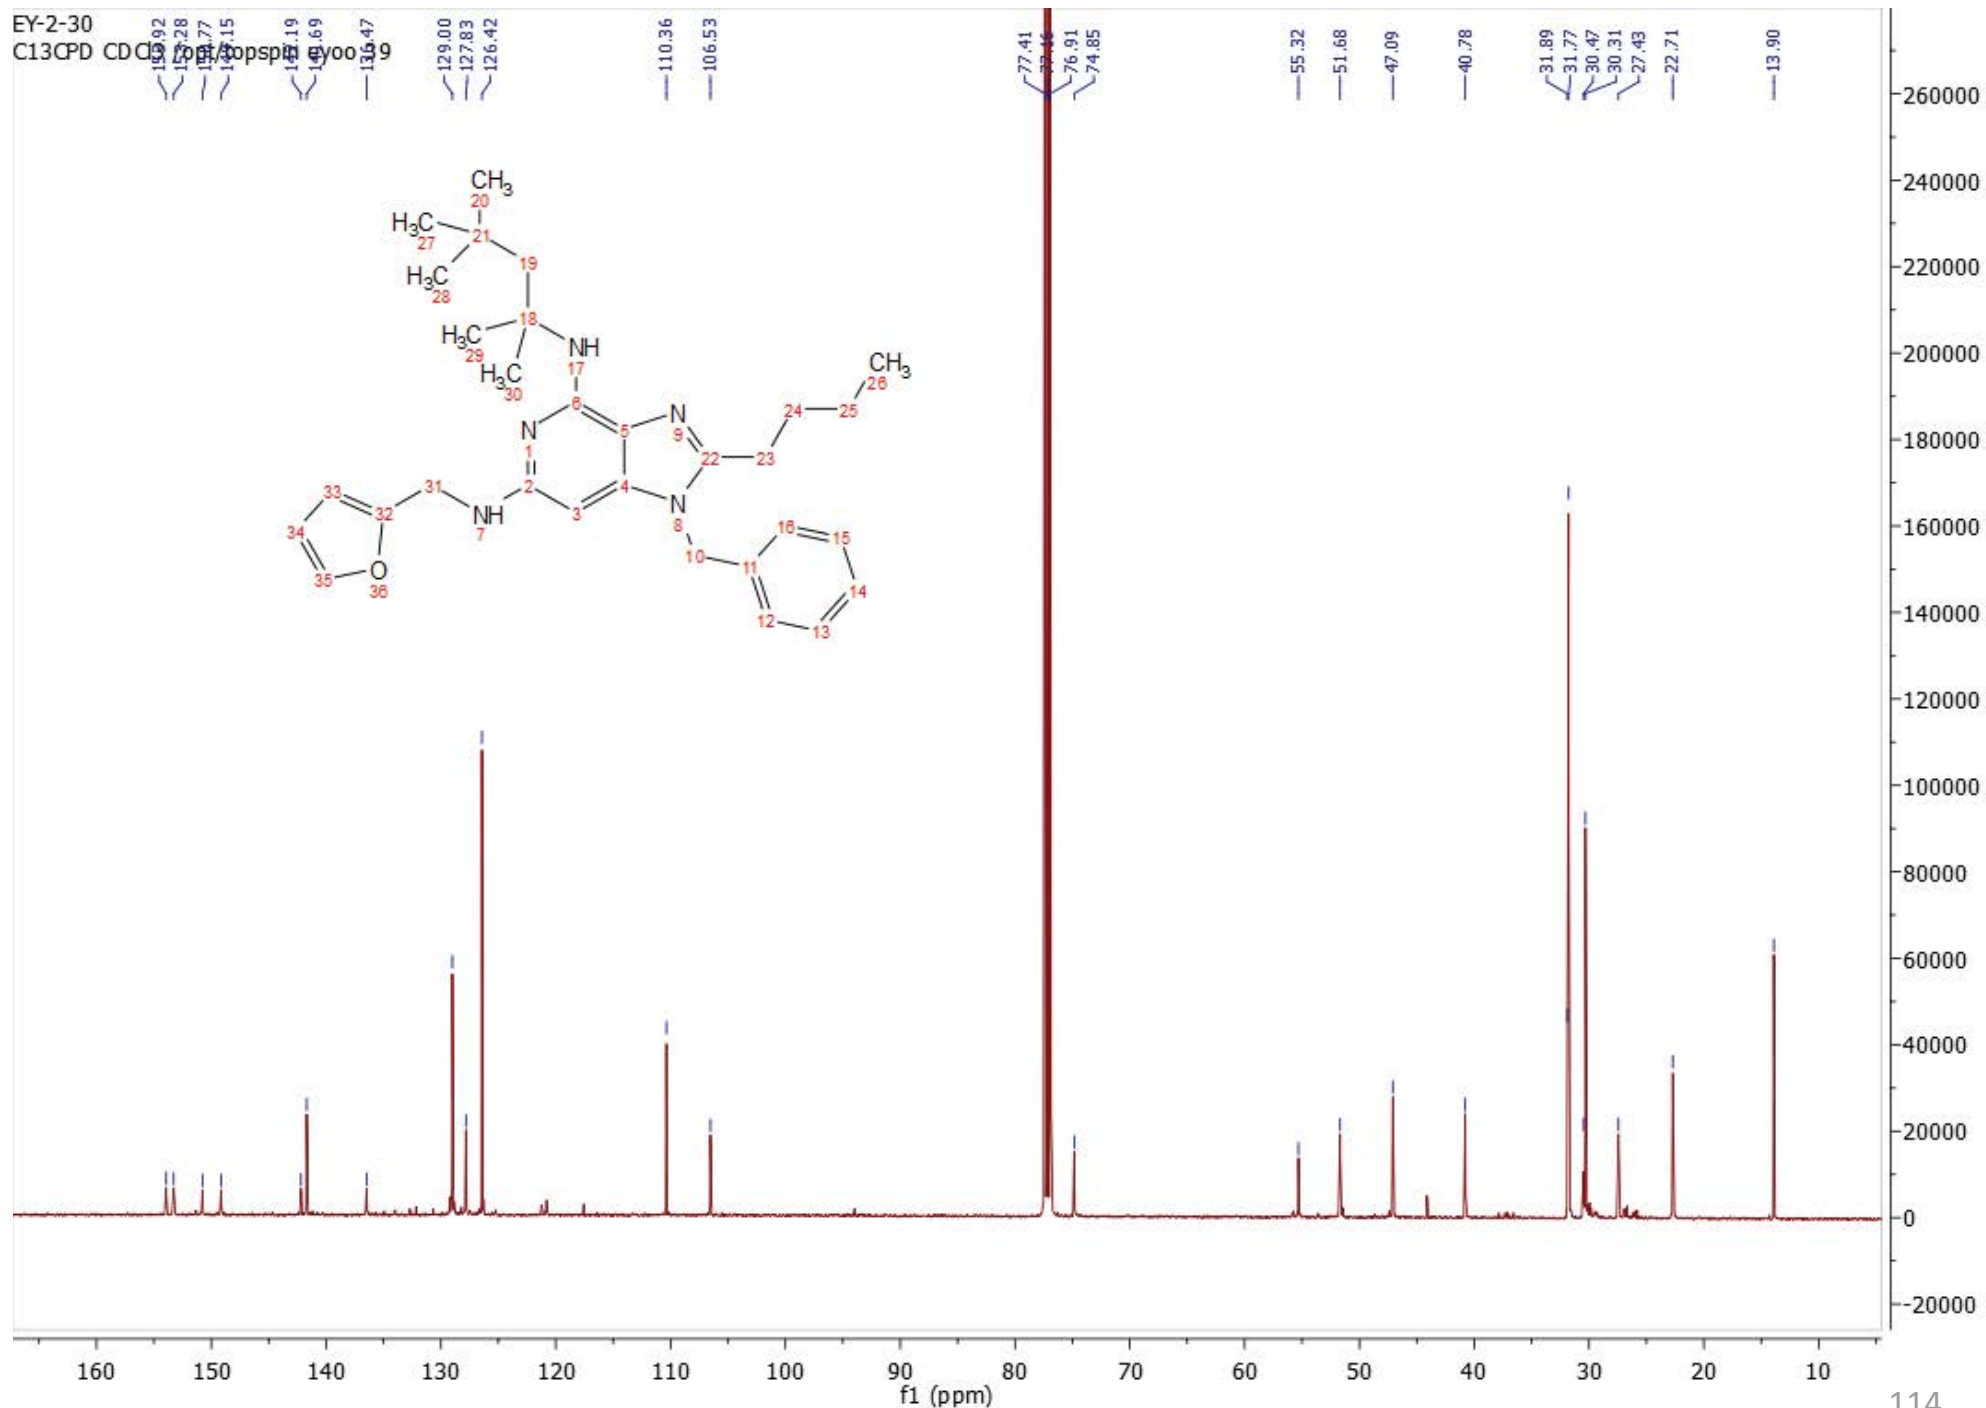

# 18k MS

|               |                      |             |                      |                 |              |                        |                      |
|---------------|----------------------|-------------|----------------------|-----------------|--------------|------------------------|----------------------|
| Sample Name   | 05.11.12 EY-2-30 tub | Position    | Vial 1               | Instrument Name | Instrument 1 | User Name              |                      |
| Inj Vol       | -1                   | InjPosition |                      | SampleType      | Sample       | IRM Calibration Status | Success              |
| Data Filename | 05.11.12 EY-2-30 tub | ACQ Method  | Water-ACN Infusion M | Comment         |              | Acquired Time          | 5/11/2012 4:22:55 PM |

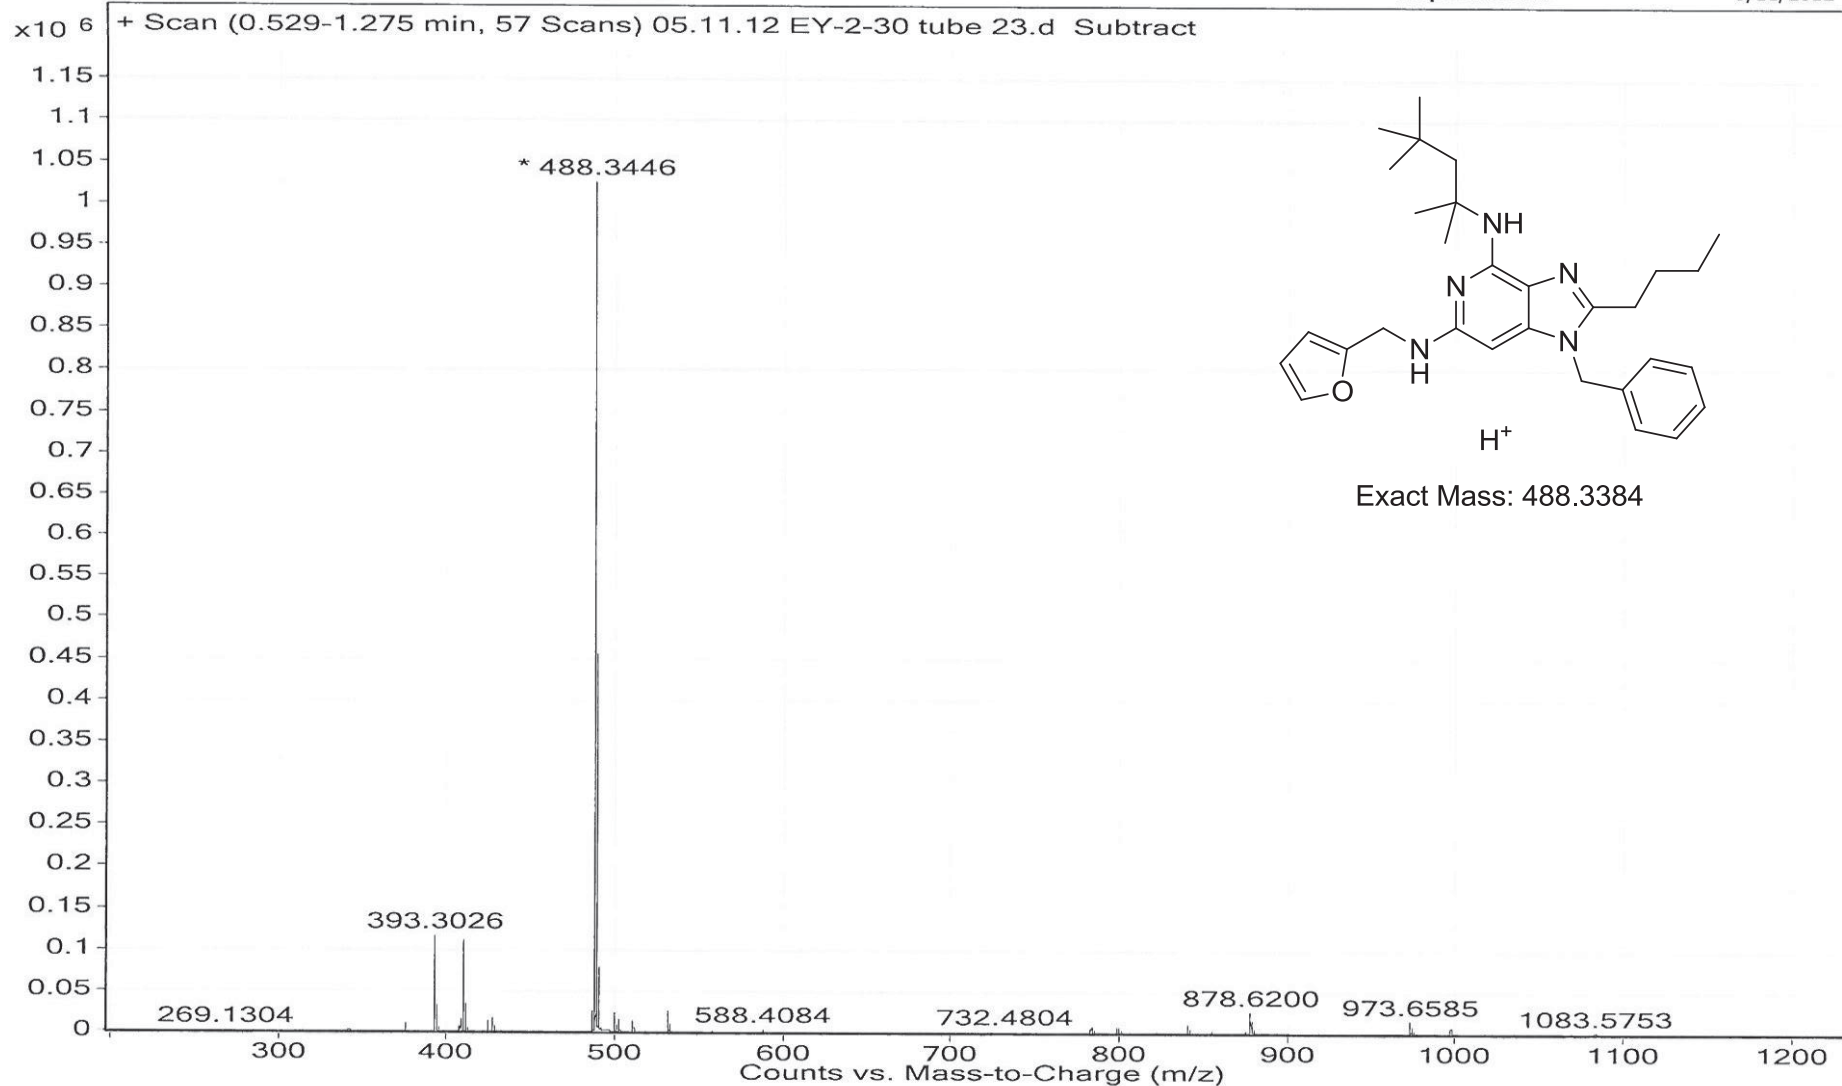

# 19k <sup>1</sup>H NMR

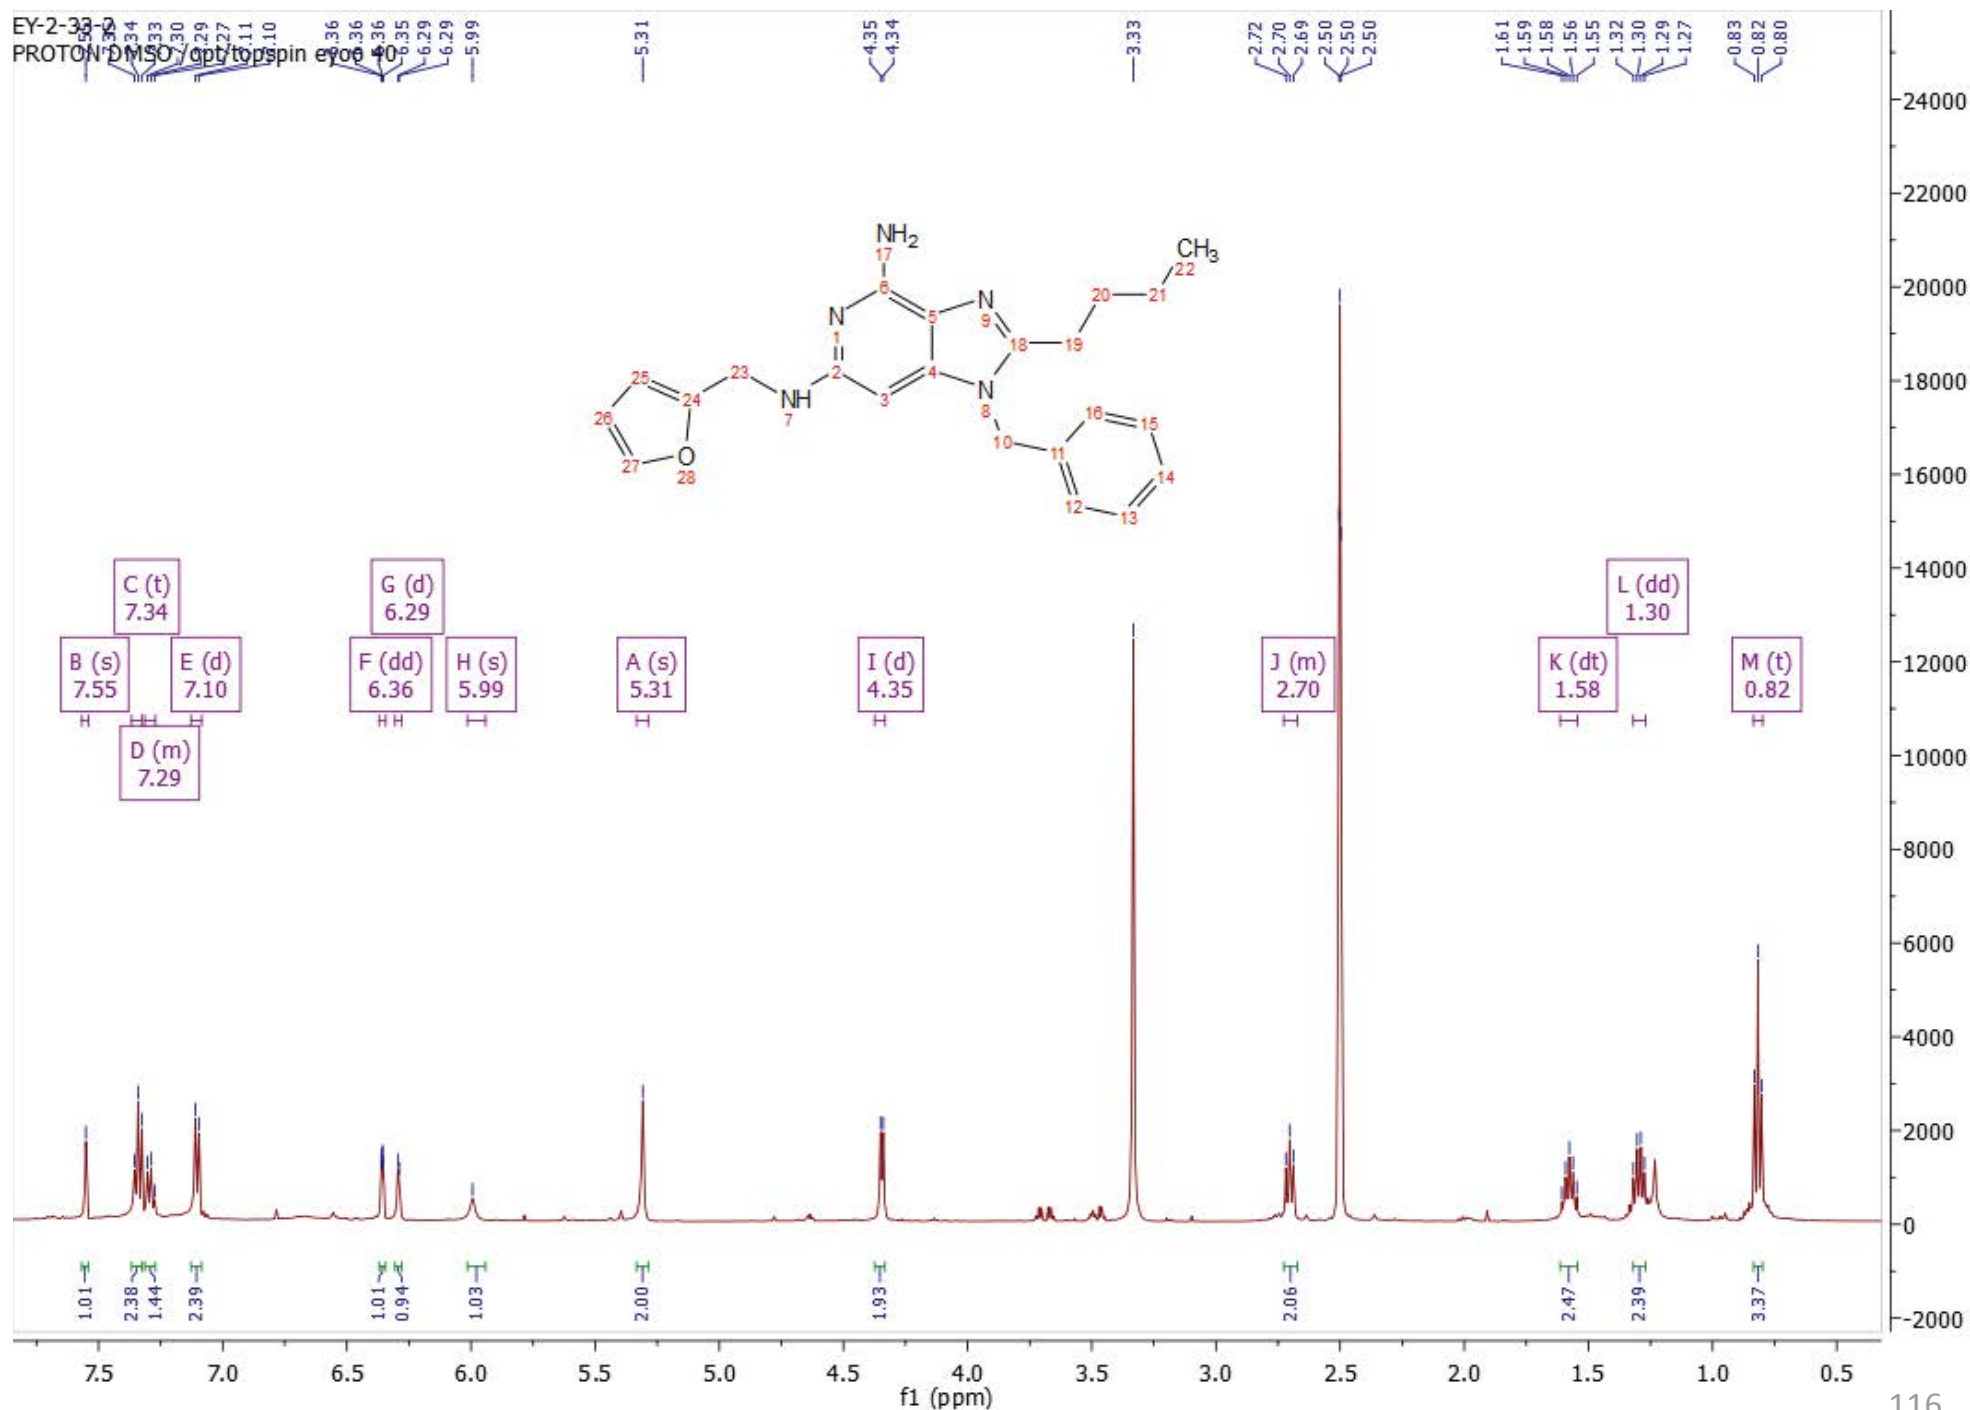



# 19k <sup>13</sup>C NMR

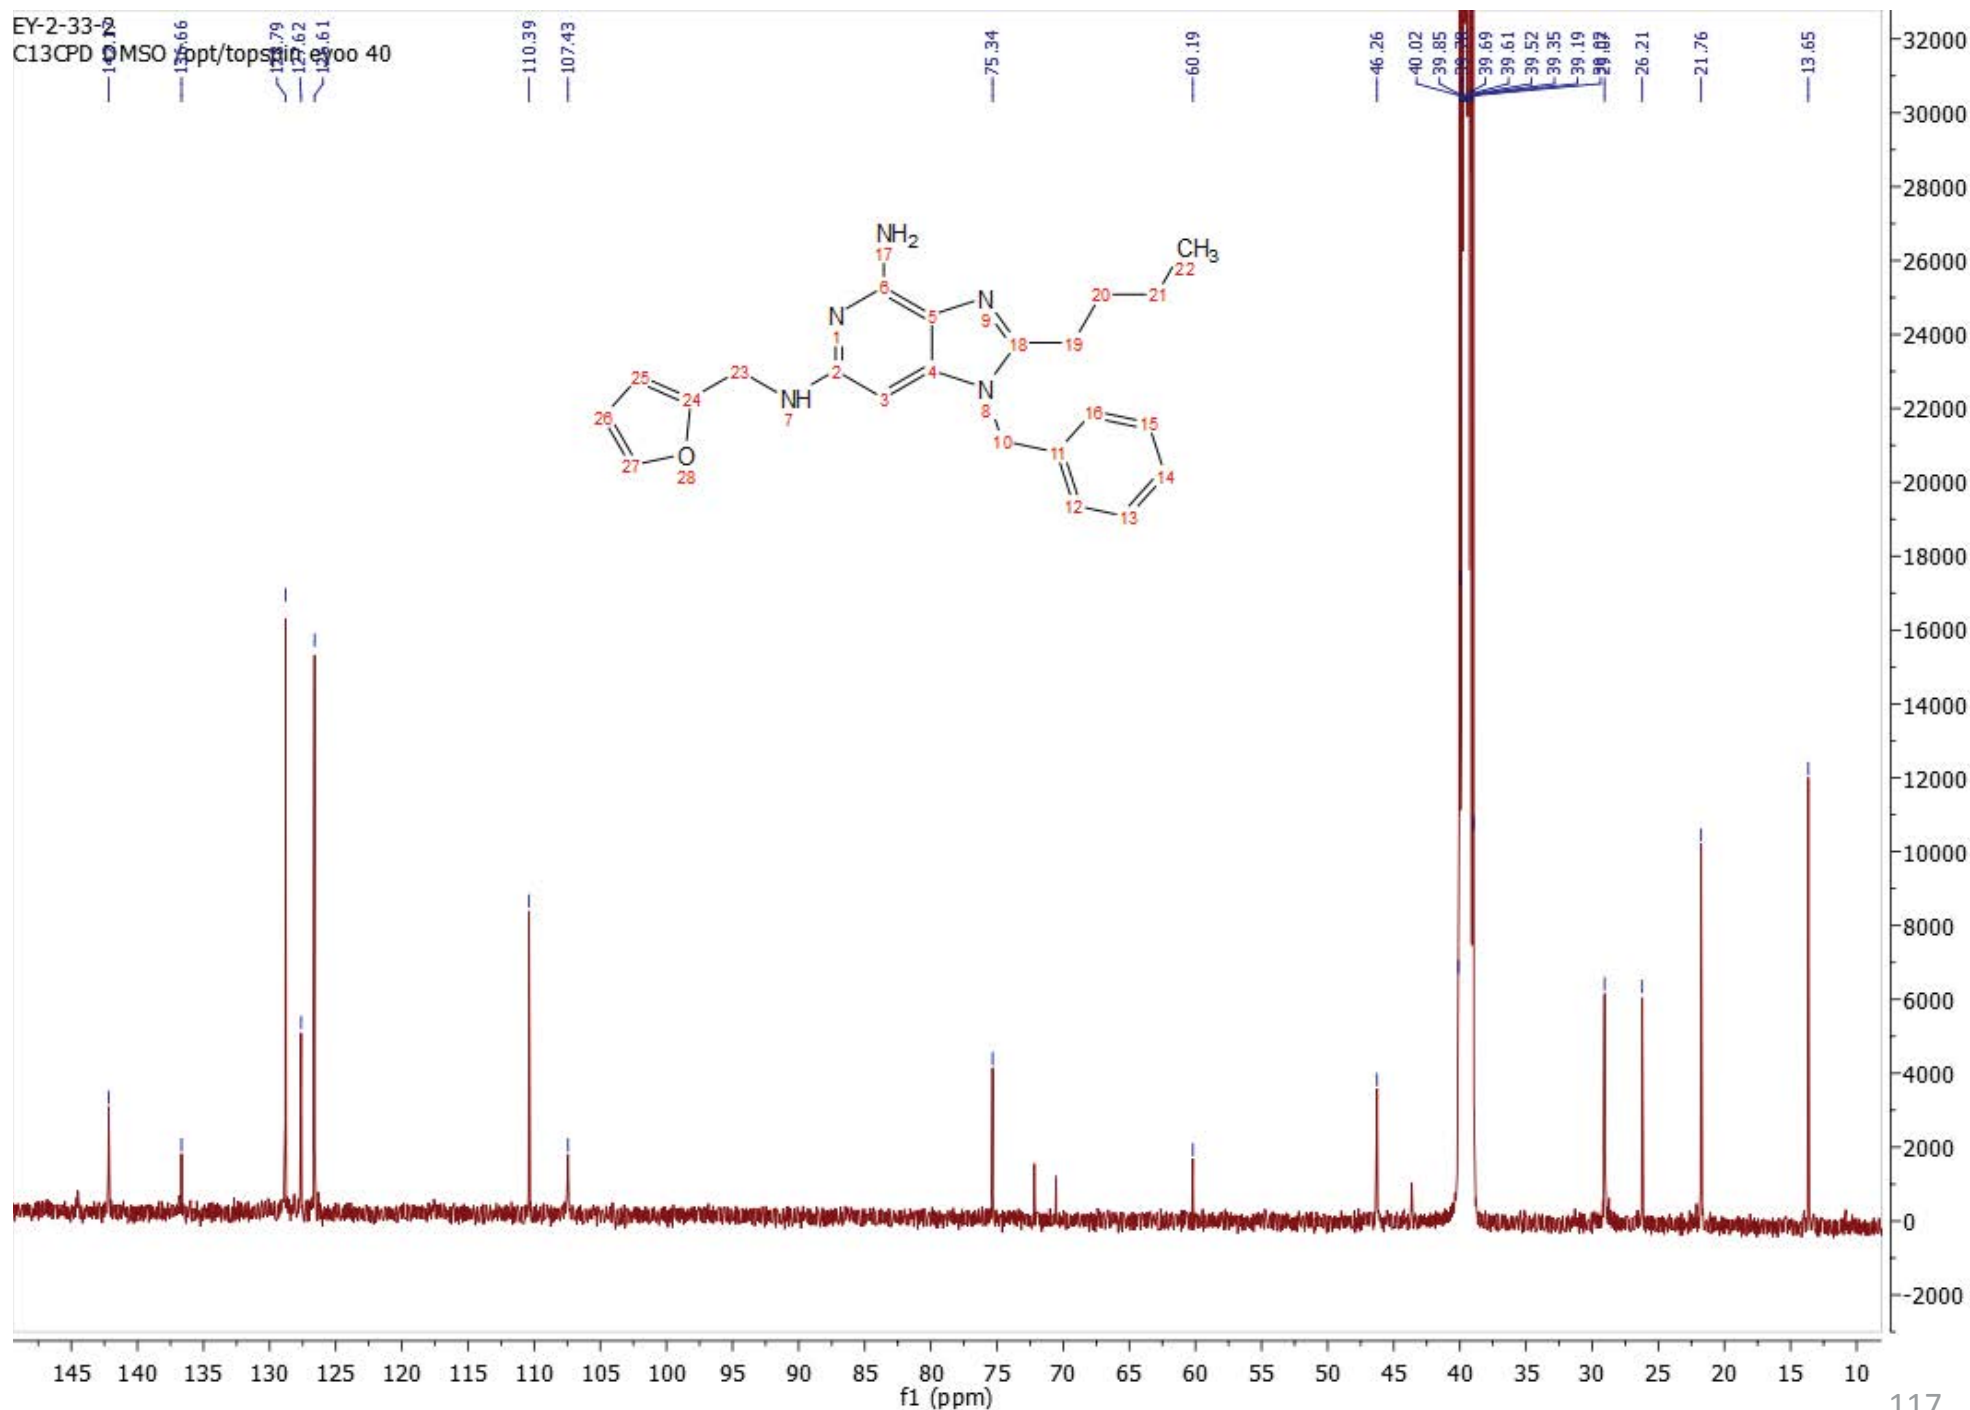



# 19k MS

|               |                      |             |                      |                 |              |                        |                       |
|---------------|----------------------|-------------|----------------------|-----------------|--------------|------------------------|-----------------------|
| Sample Name   | 05.14.12 EY-2-33 tub | Position    | Vial 1               | Instrument Name | Instrument 1 | User Name              |                       |
| Inj Vol       | 1                    | InjPosition |                      | SampleType      | Sample       | IRM Calibration Status | Success               |
| Data Filename | 05.14.12 EY-2-33 tub | ACQ Method  | Water-ACN Infusion M | Comment         |              | Acquired Time          | 5/14/2012 12:52:41 PM |

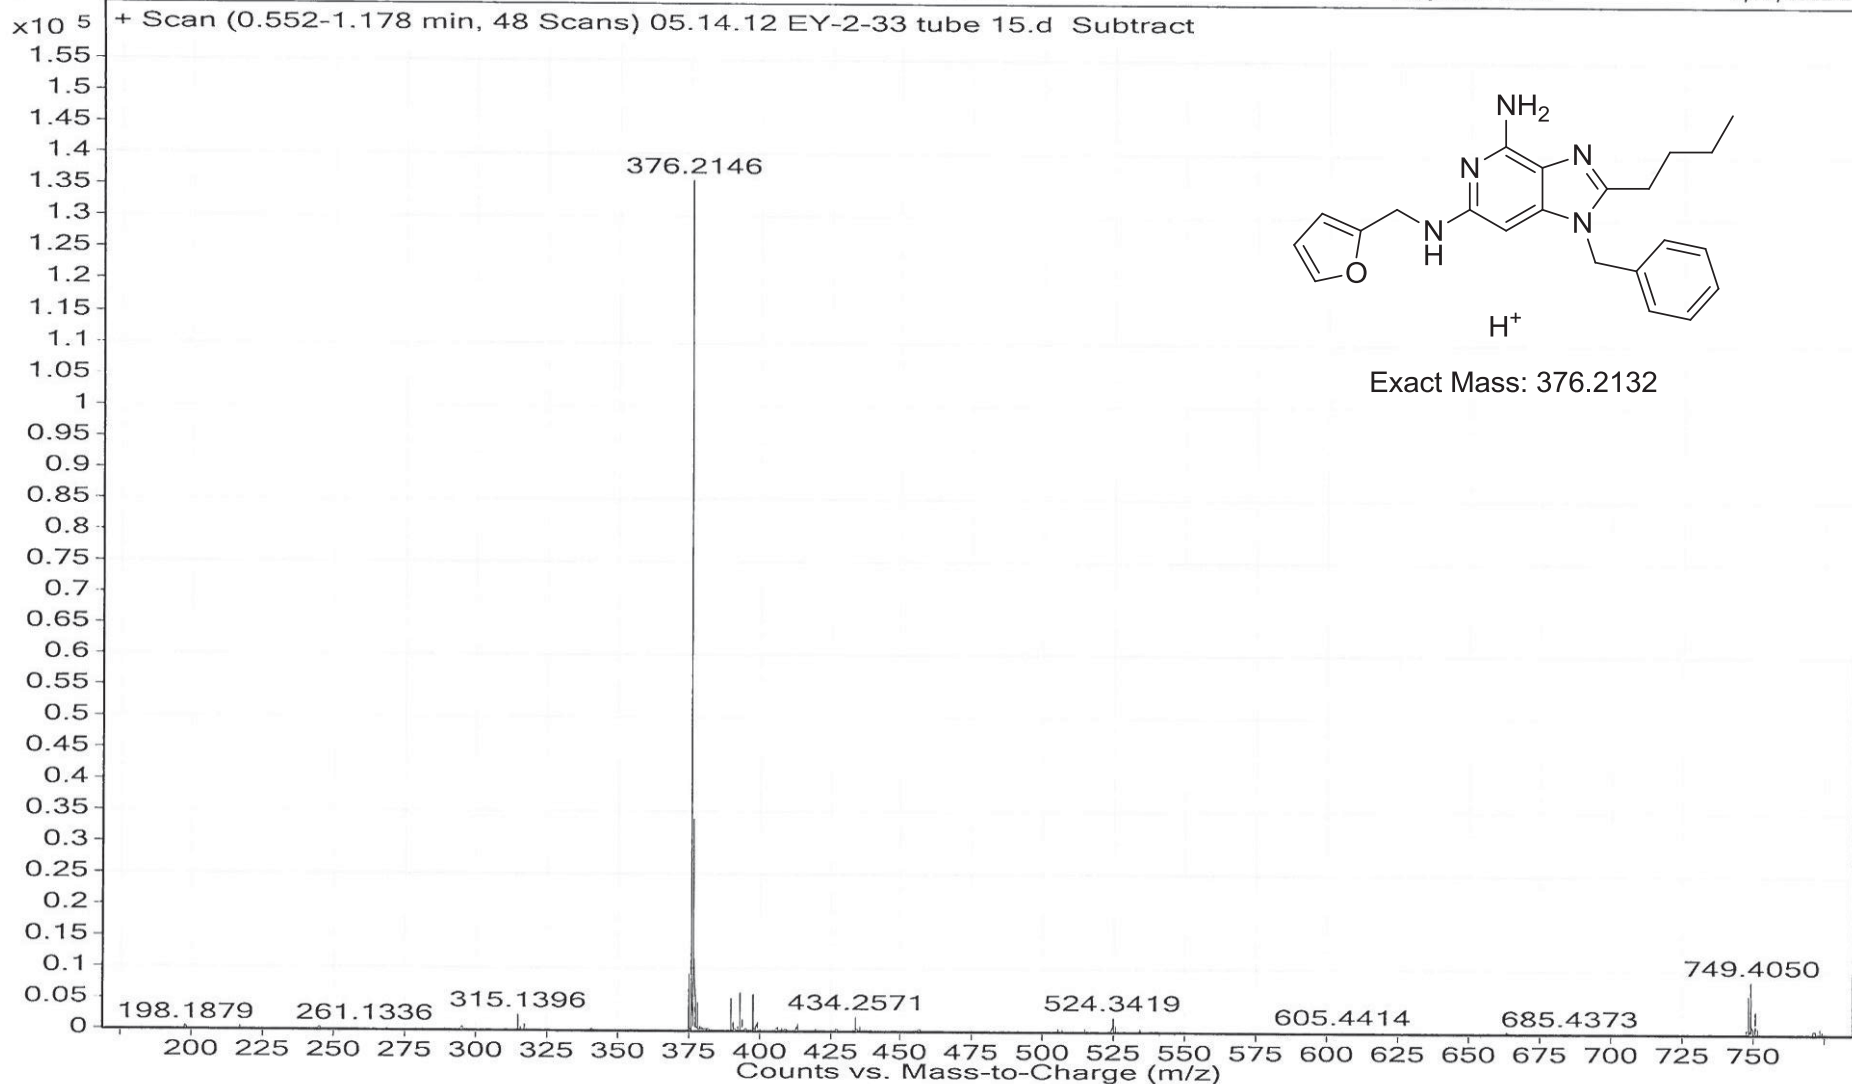

# 19k LC-MS

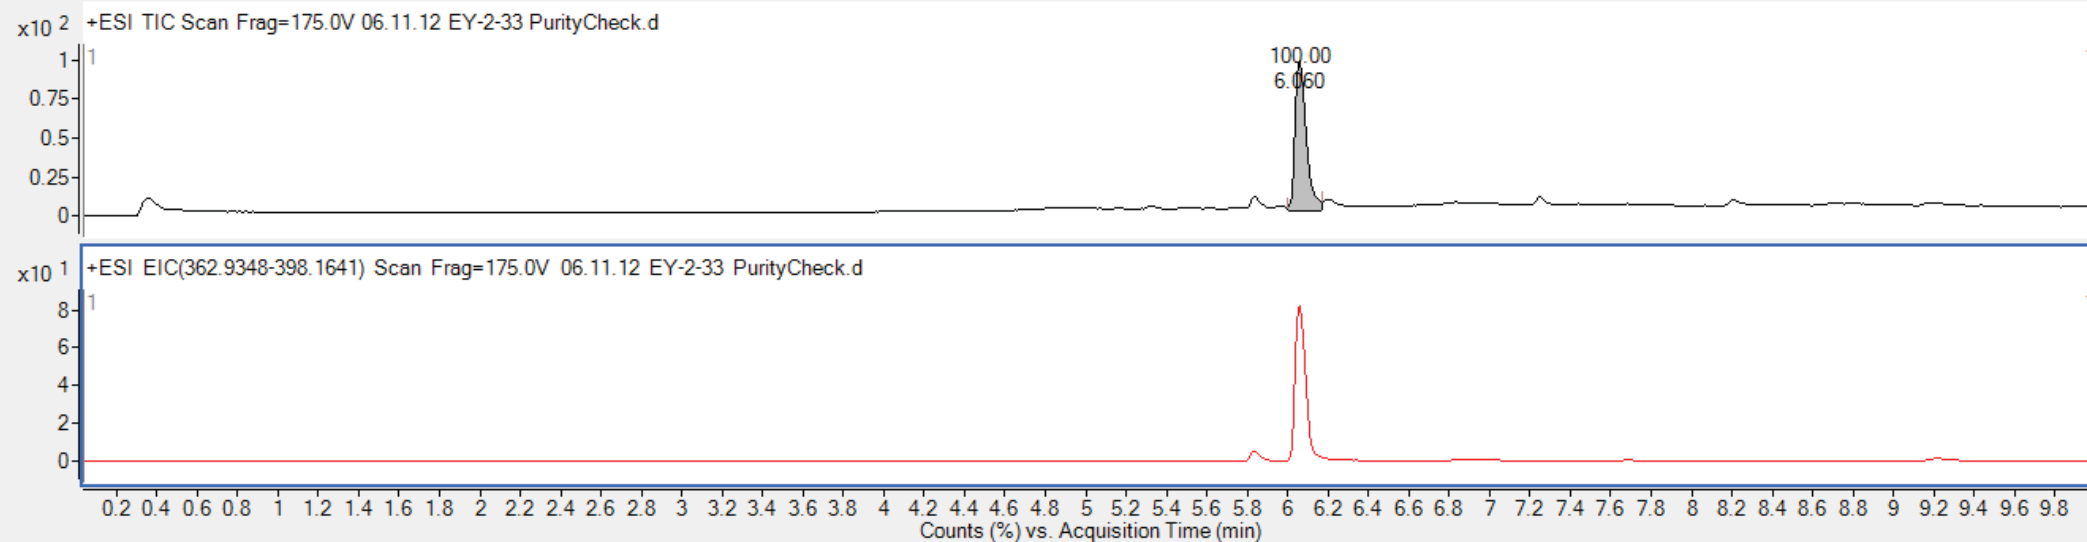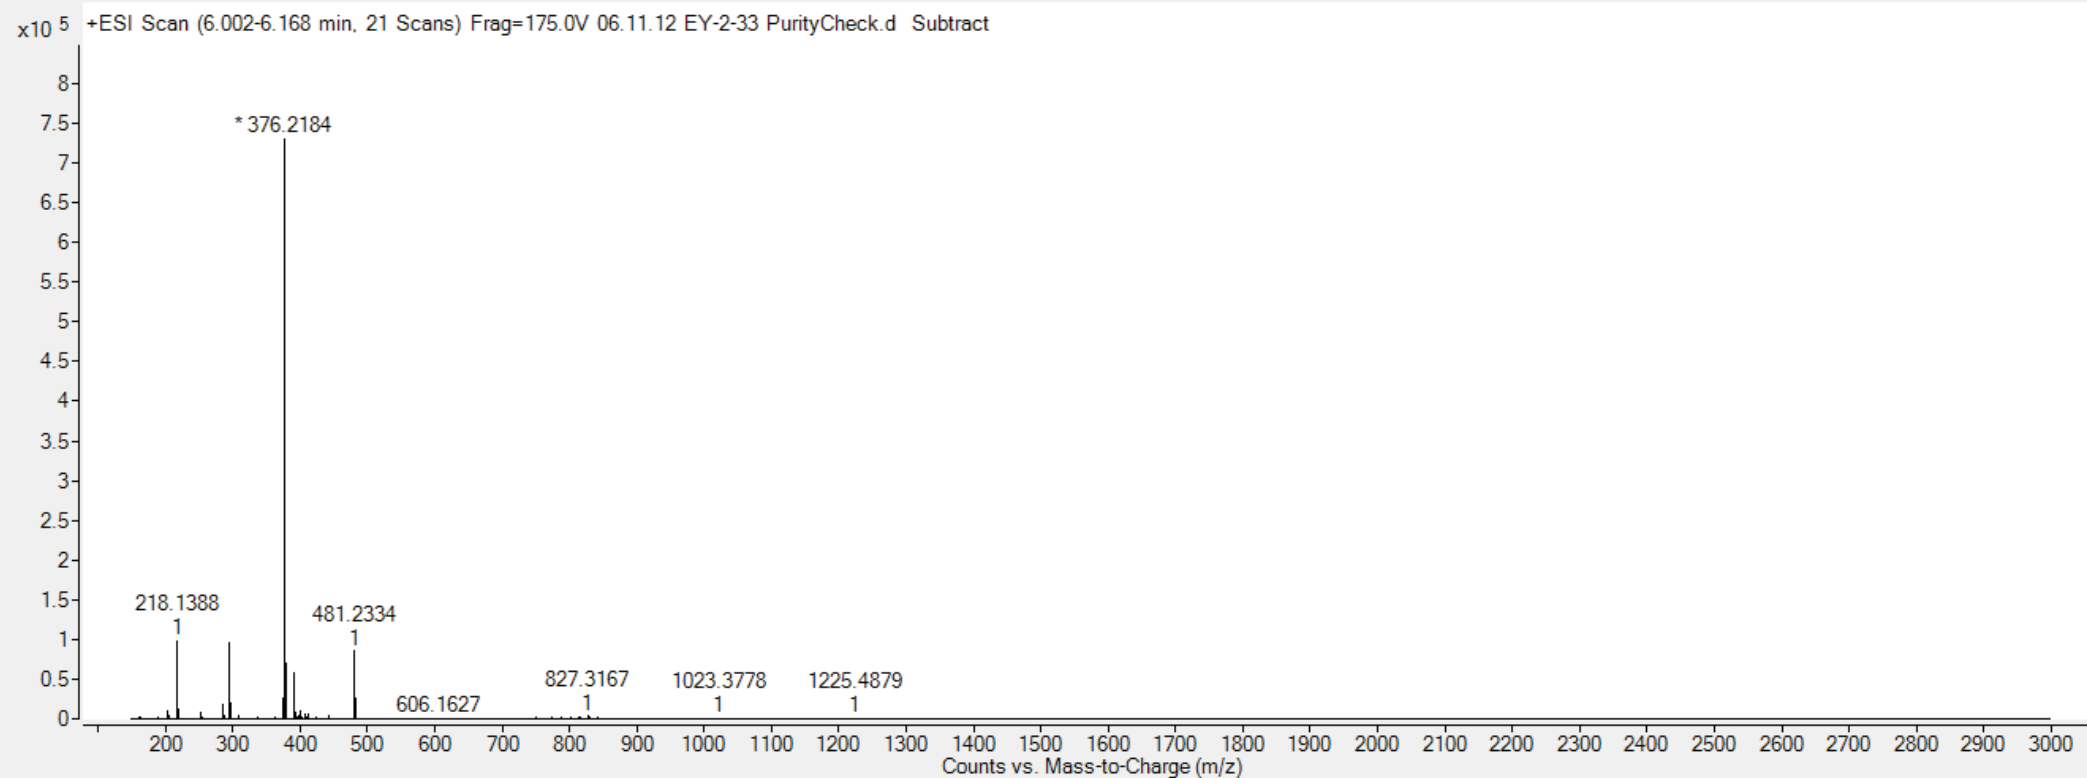

# **1H NMR**

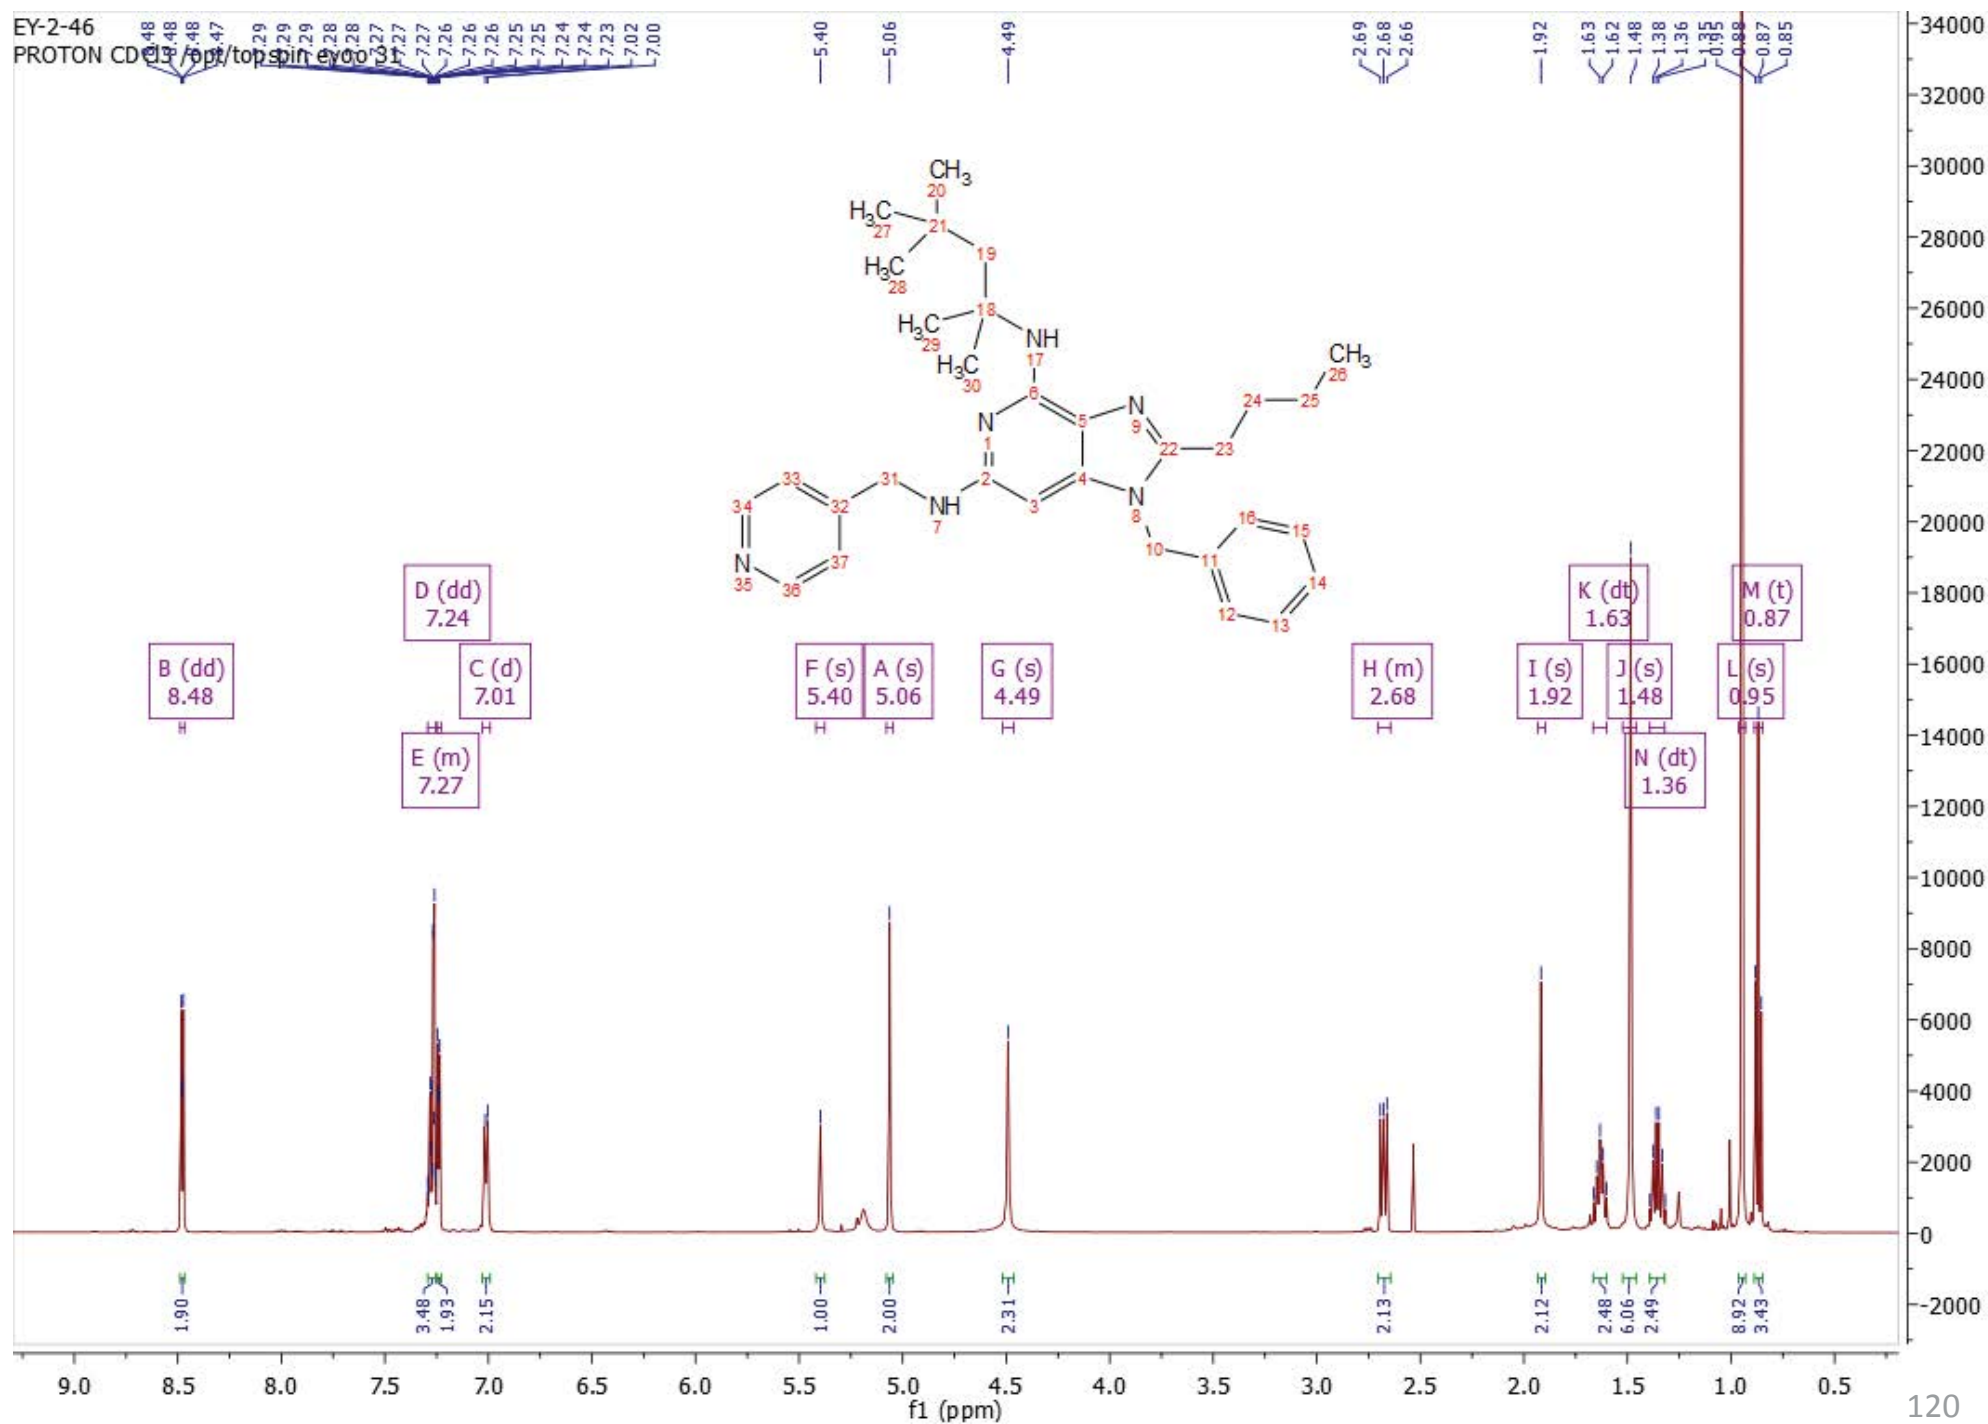

# **13C NMR**

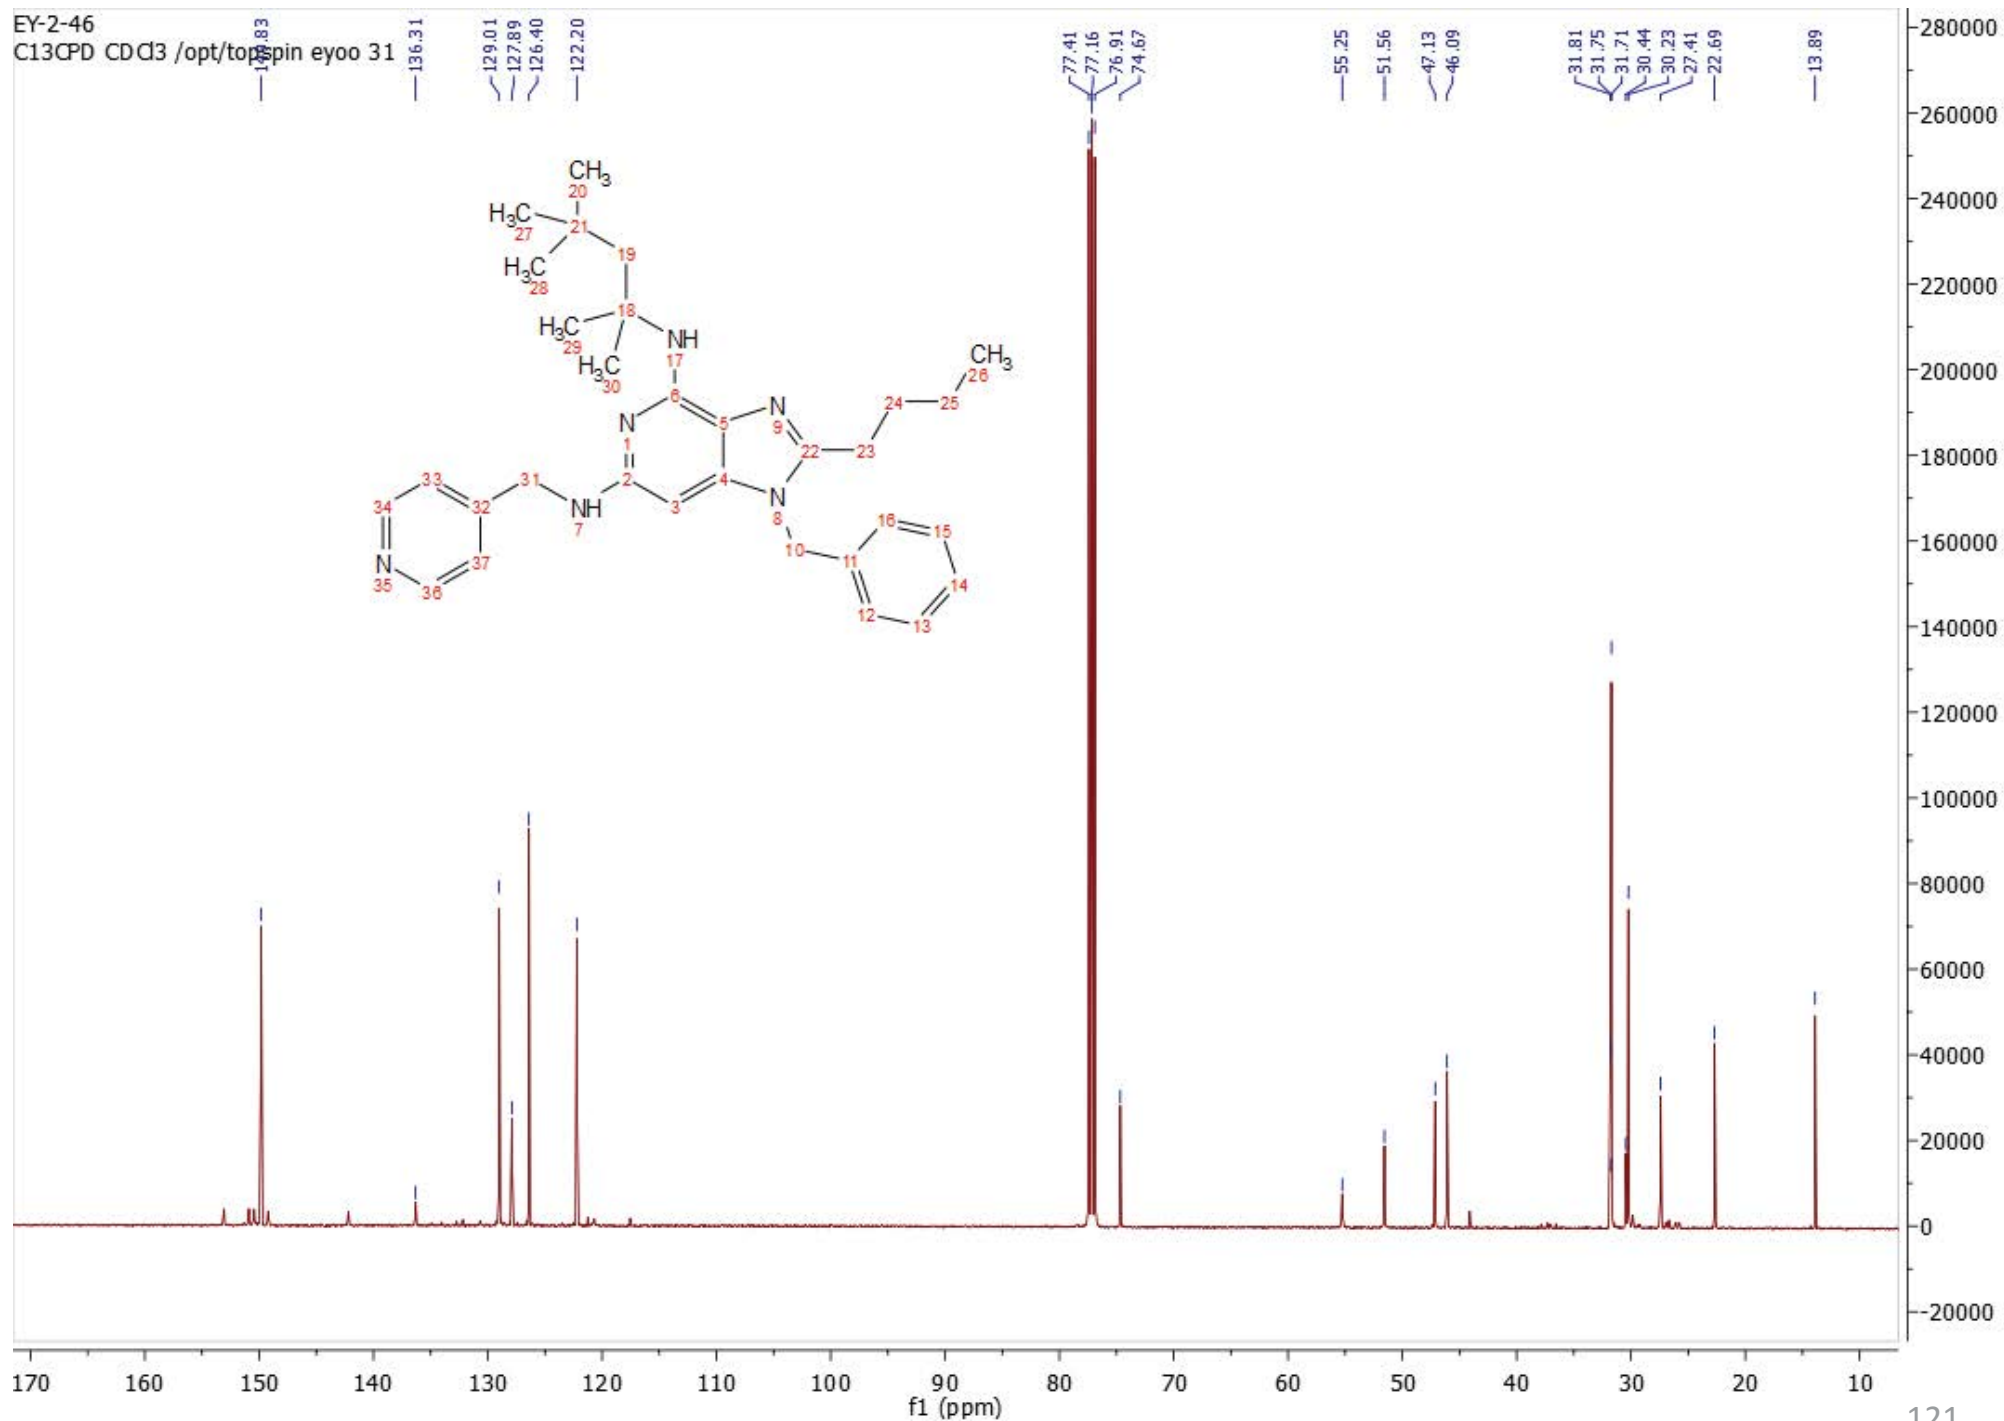

# 181 MS

|               |                      |             |                      |                 |              |                        |                      |
|---------------|----------------------|-------------|----------------------|-----------------|--------------|------------------------|----------------------|
| Sample Name   | 05.18.12 EY-2-46 tub | Position    | Vial 2               | Instrument Name | Instrument 1 | User Name              |                      |
| Inj Vol       | -1                   | InjPosition |                      | SampleType      | Sample       | IRM Calibration Status | Success              |
| Data Filename | 05.18.12 EY-2-46 tub | ACQ Method  | Water-ACN Infusion M | Comment         |              | Acquired Time          | 5/18/2012 4:08:49 PM |

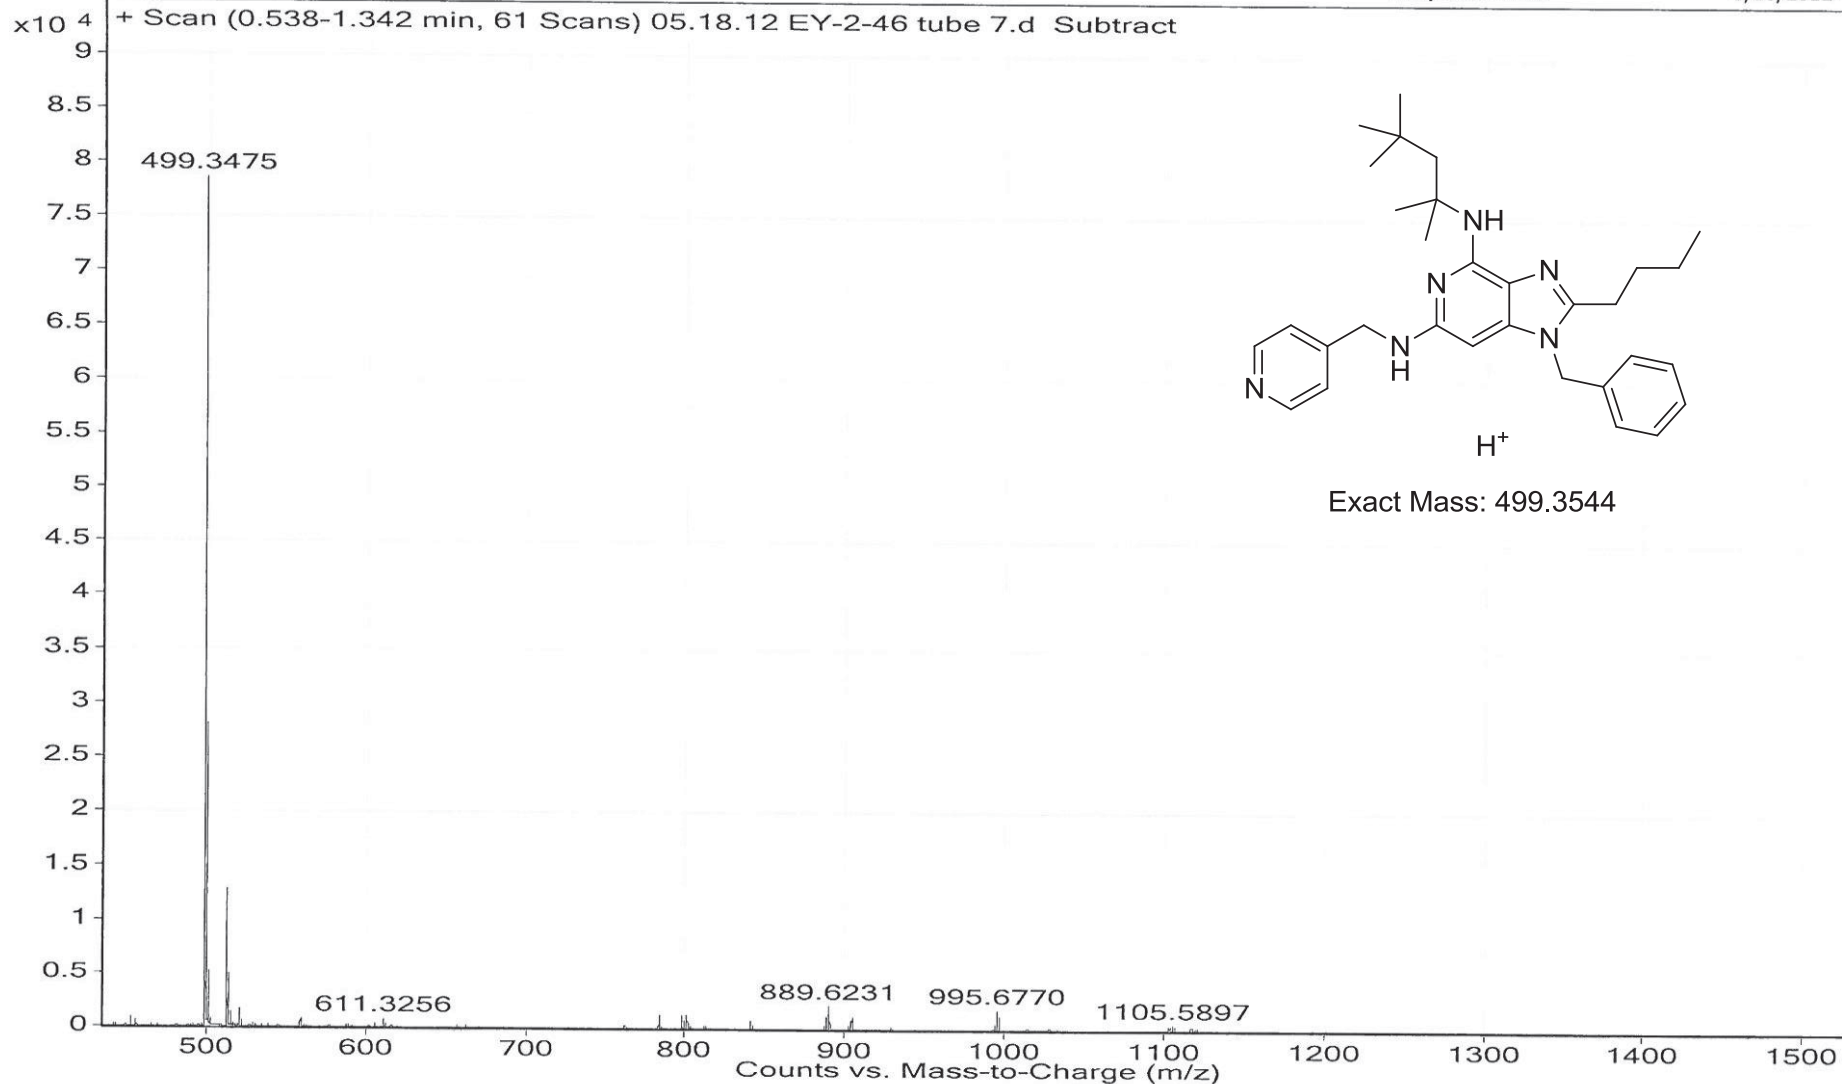

# <sup>1</sup>H NMR

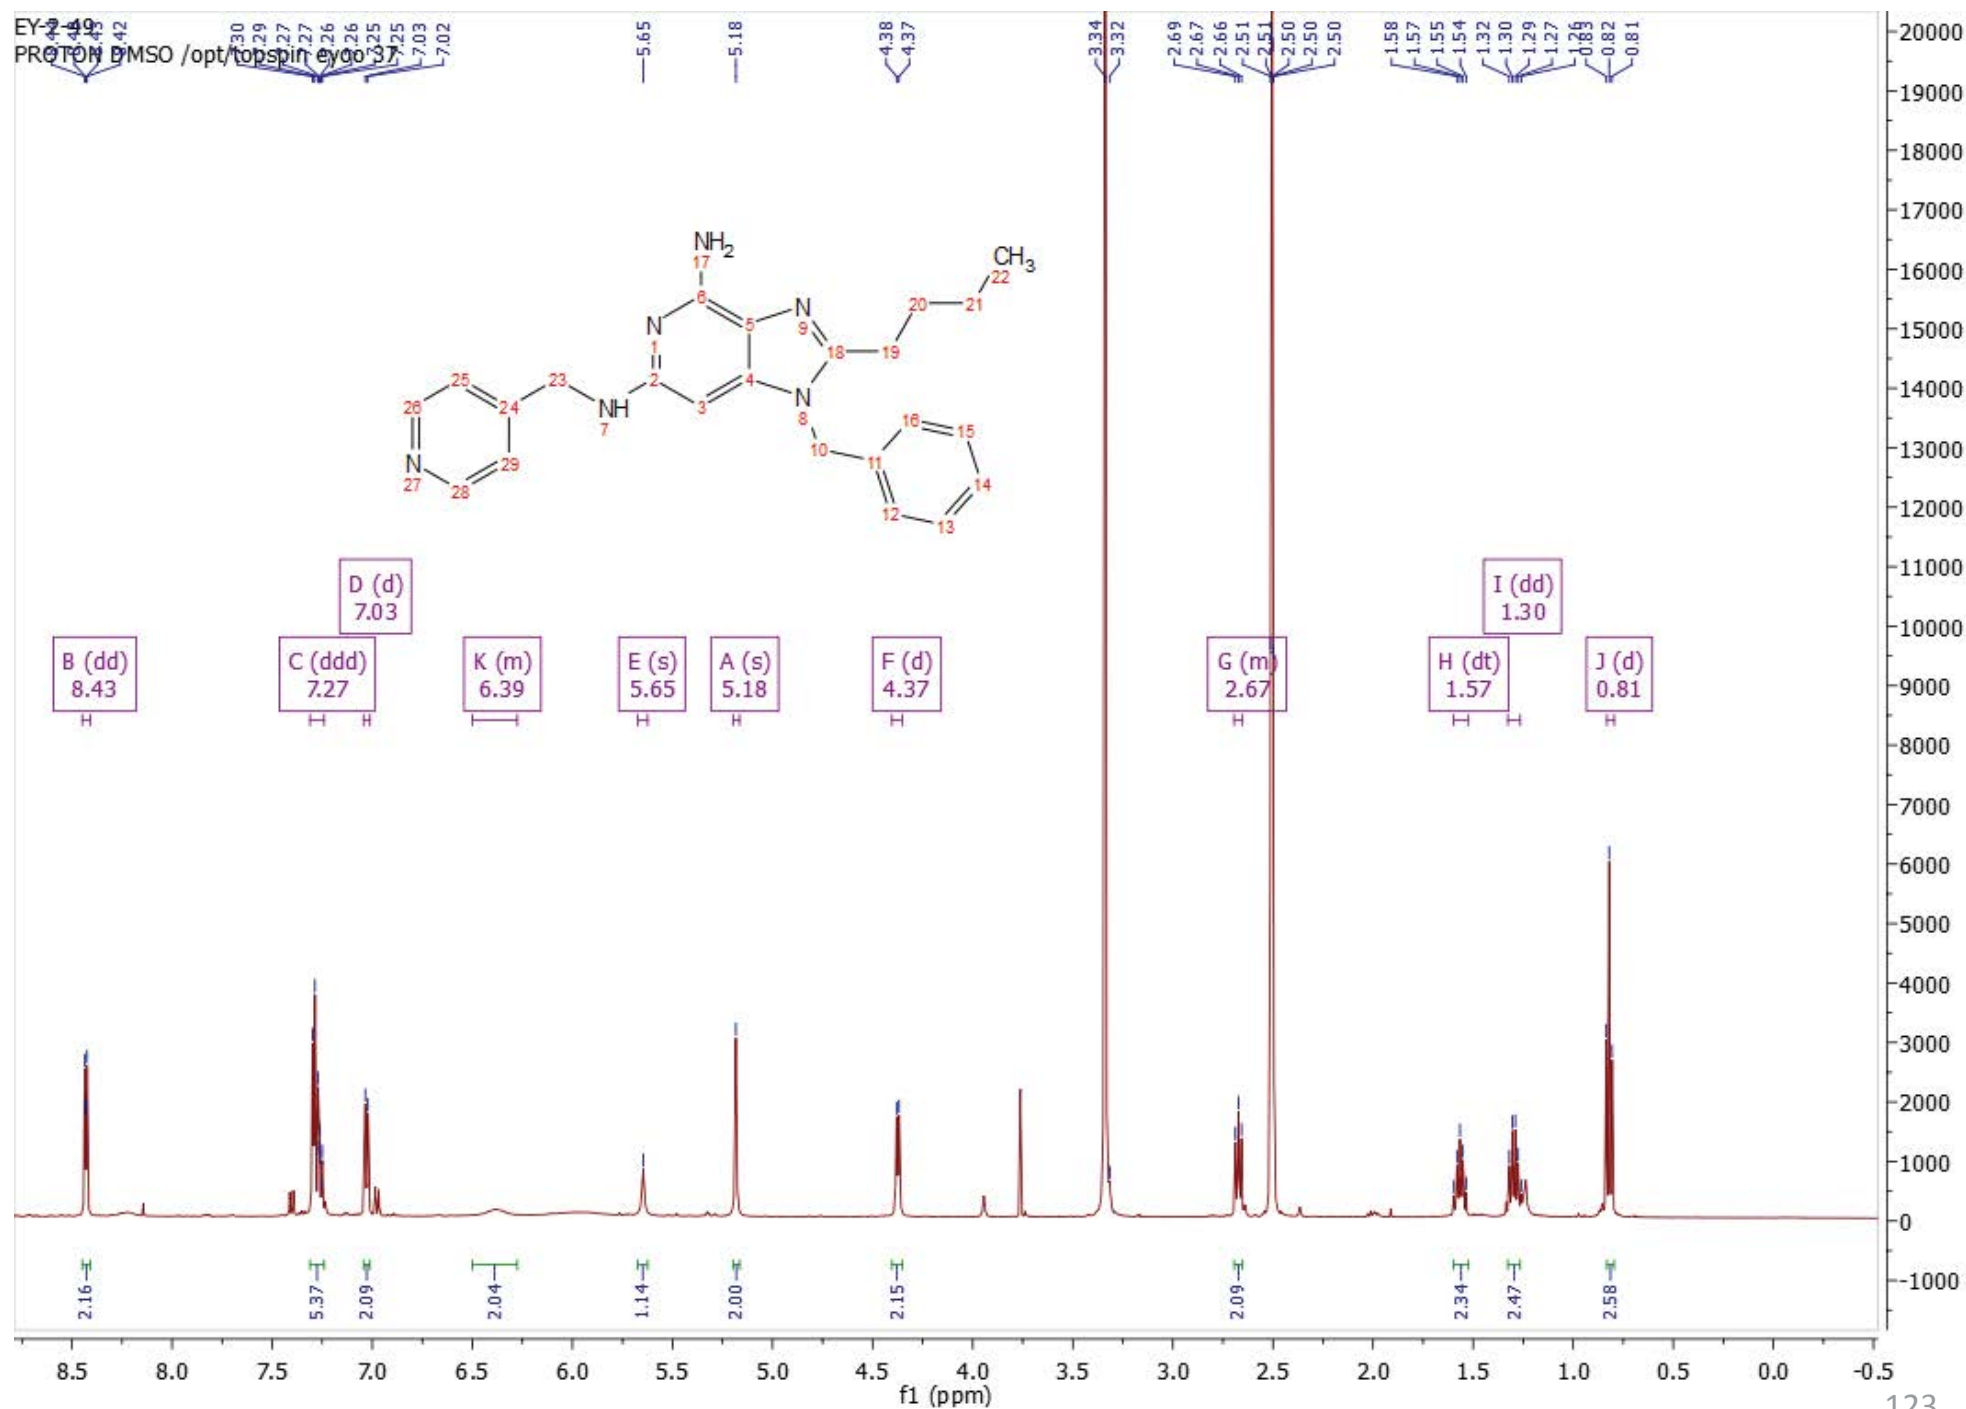



# **<sup>13</sup>C NMR**

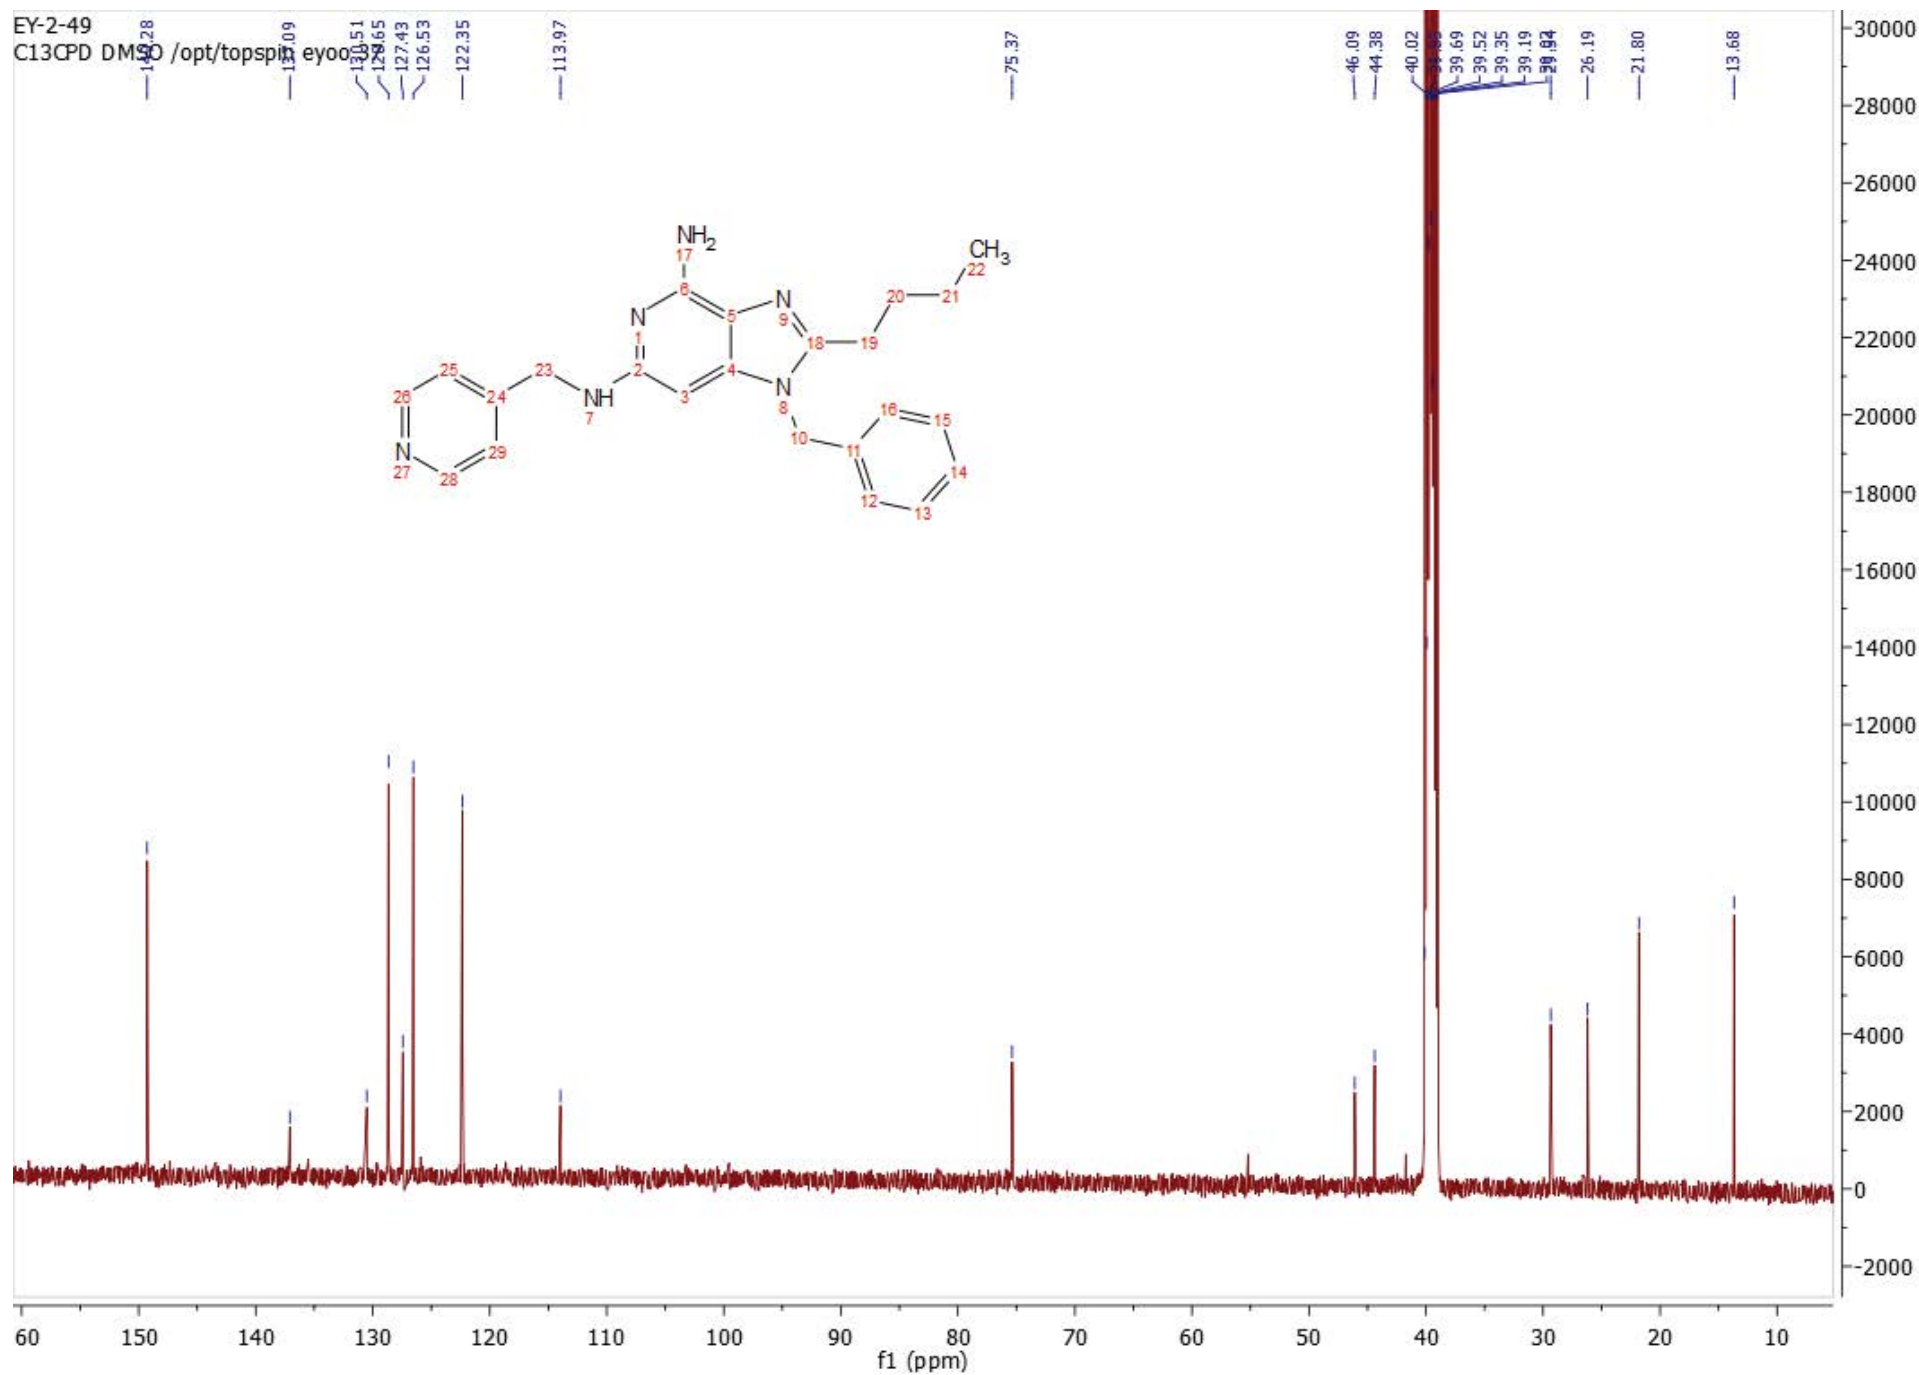



# 191 MS

|               |                      |             |                      |                 |              |                        |                       |
|---------------|----------------------|-------------|----------------------|-----------------|--------------|------------------------|-----------------------|
| Sample Name   | 05.21.12 EY-2-49 tub | Position    | Vial 1               | Instrument Name | Instrument 1 | User Name              |                       |
| Inj Vol       | -1                   | InjPosition |                      | SampleType      | Sample       | IRM Calibration Status | Success               |
| Data Filename | 05.21.12 EY-2-49 tub | ACQ Method  | Water-ACN Infusion M | Comment         |              | Acquired Time          | 5/21/2012 10:12:12 AM |

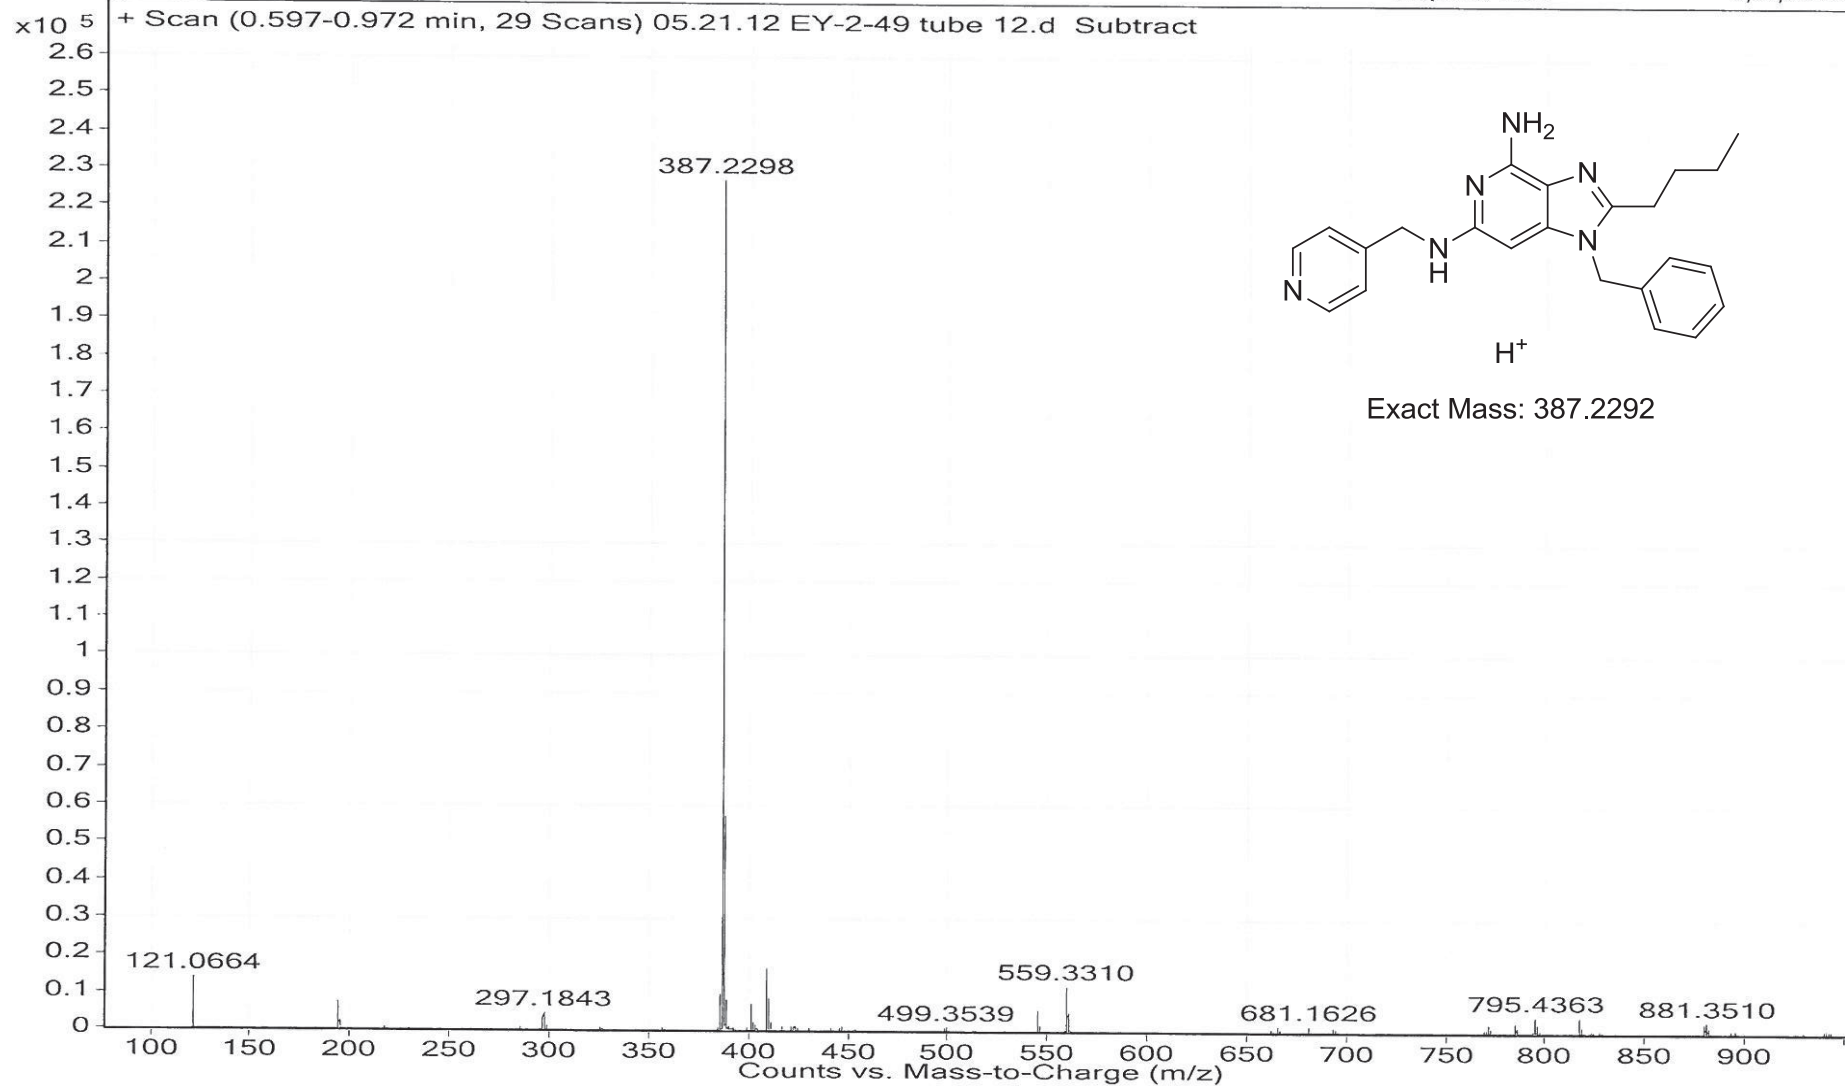

# 191 LC-MS

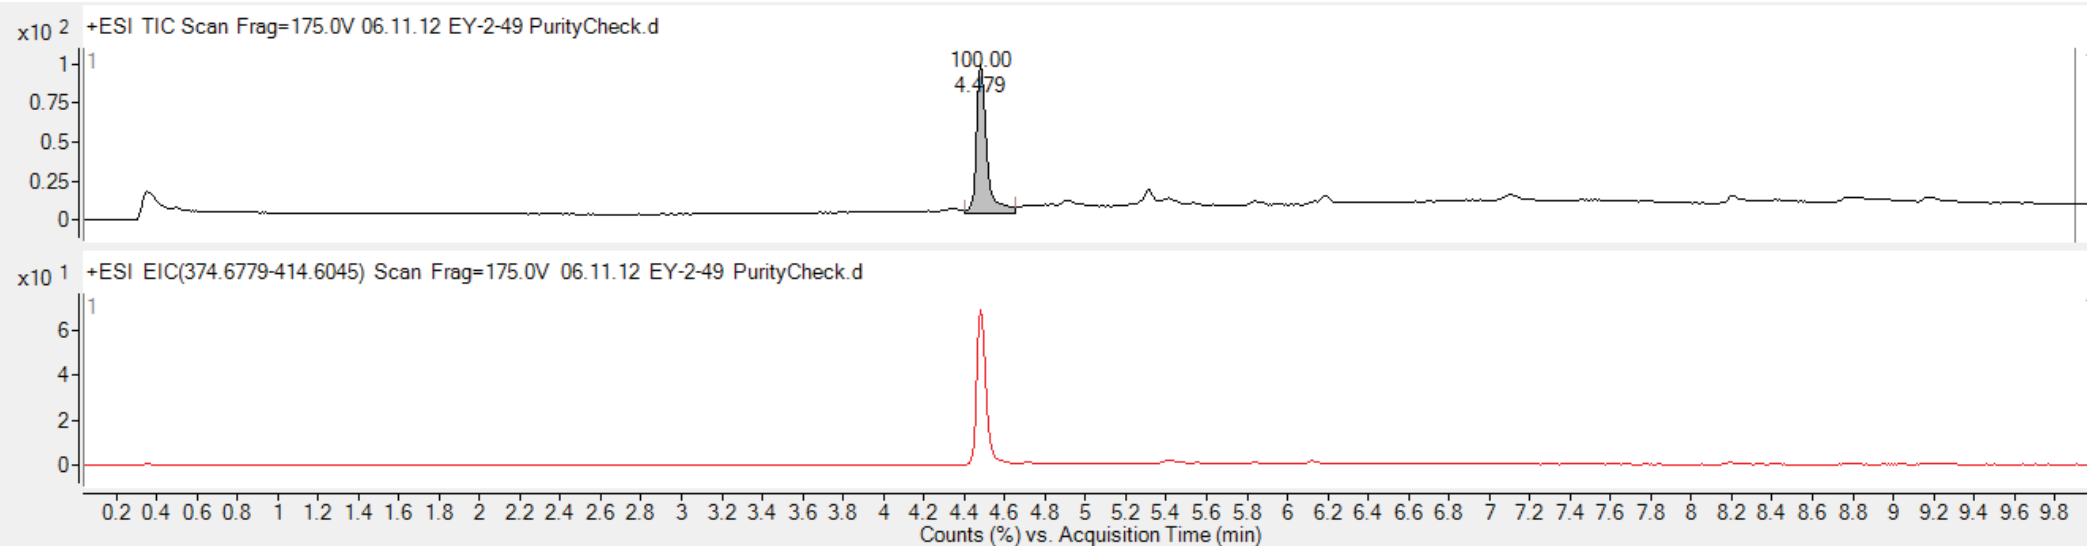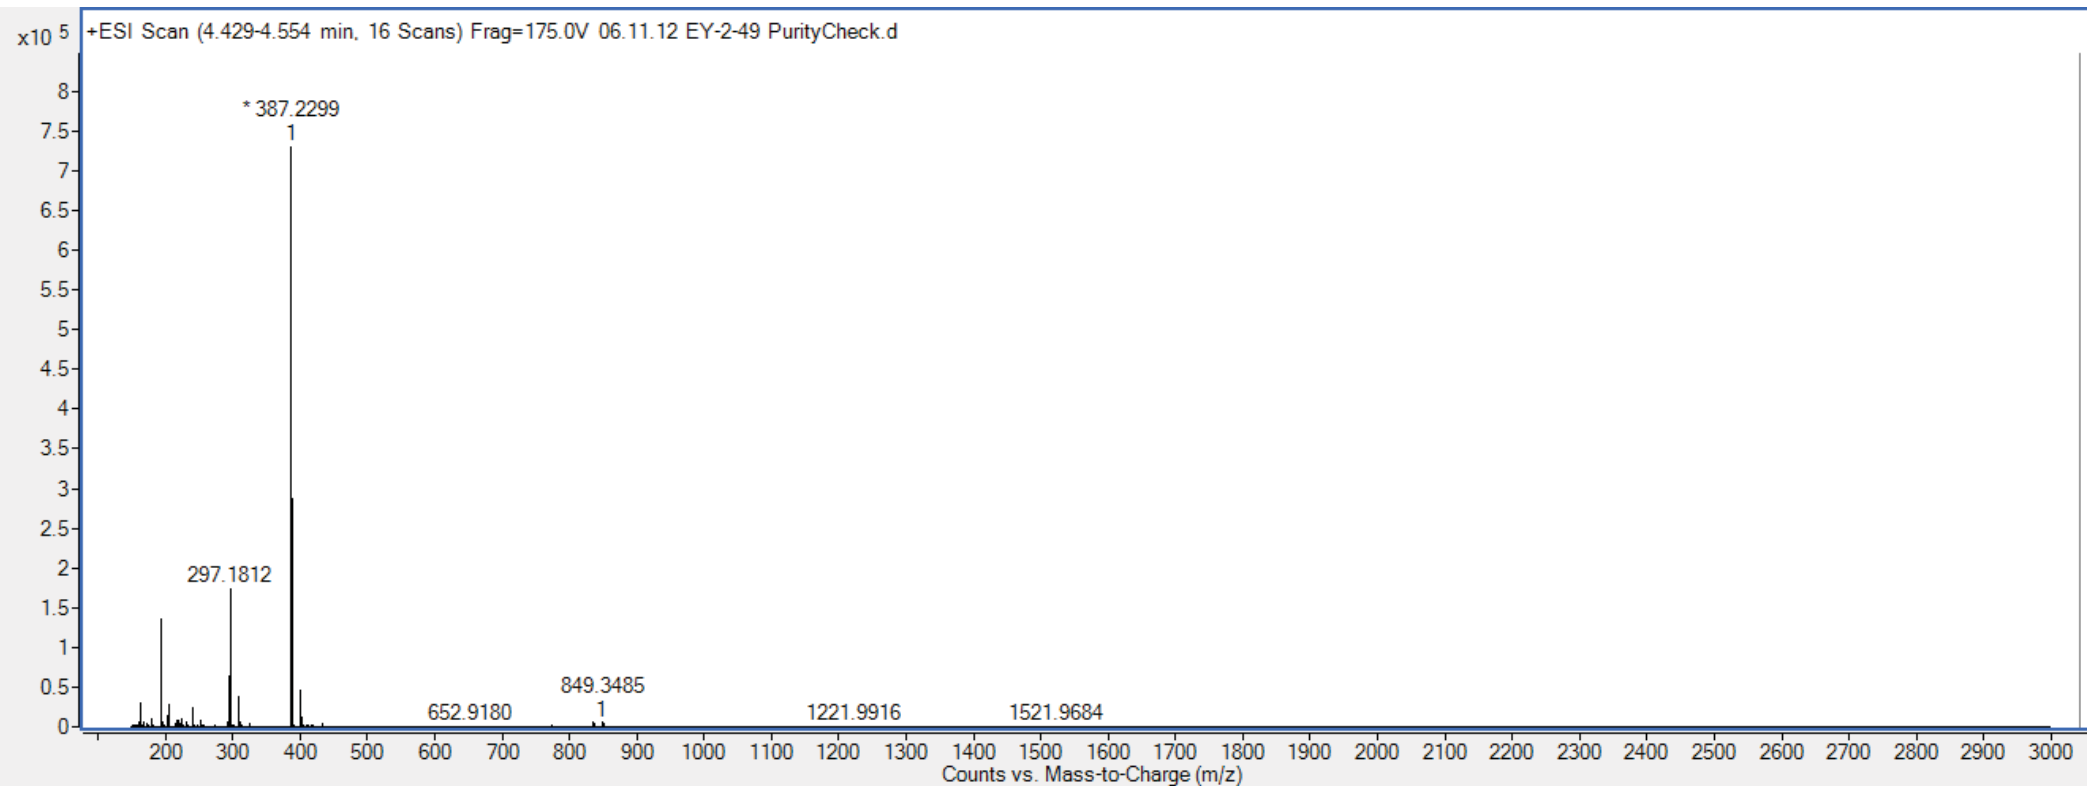

# 18m MS

|               |                      |             |                      |                 |              |                        |                      |
|---------------|----------------------|-------------|----------------------|-----------------|--------------|------------------------|----------------------|
| Sample Name   | 05.18.12 EY-2-47 tub | Position    | Vial 1               | Instrument Name | Instrument 1 | User Name              |                      |
| Inj Vol       | -1                   | InjPosition |                      | SampleType      | Sample       | IRM Calibration Status | Success              |
| Data Filename | 05.18.12 EY-2-47 tub | ACQ Method  | Water-ACN Infusion M | Comment         |              | Acquired Time          | 5/18/2012 4:04:43 PM |

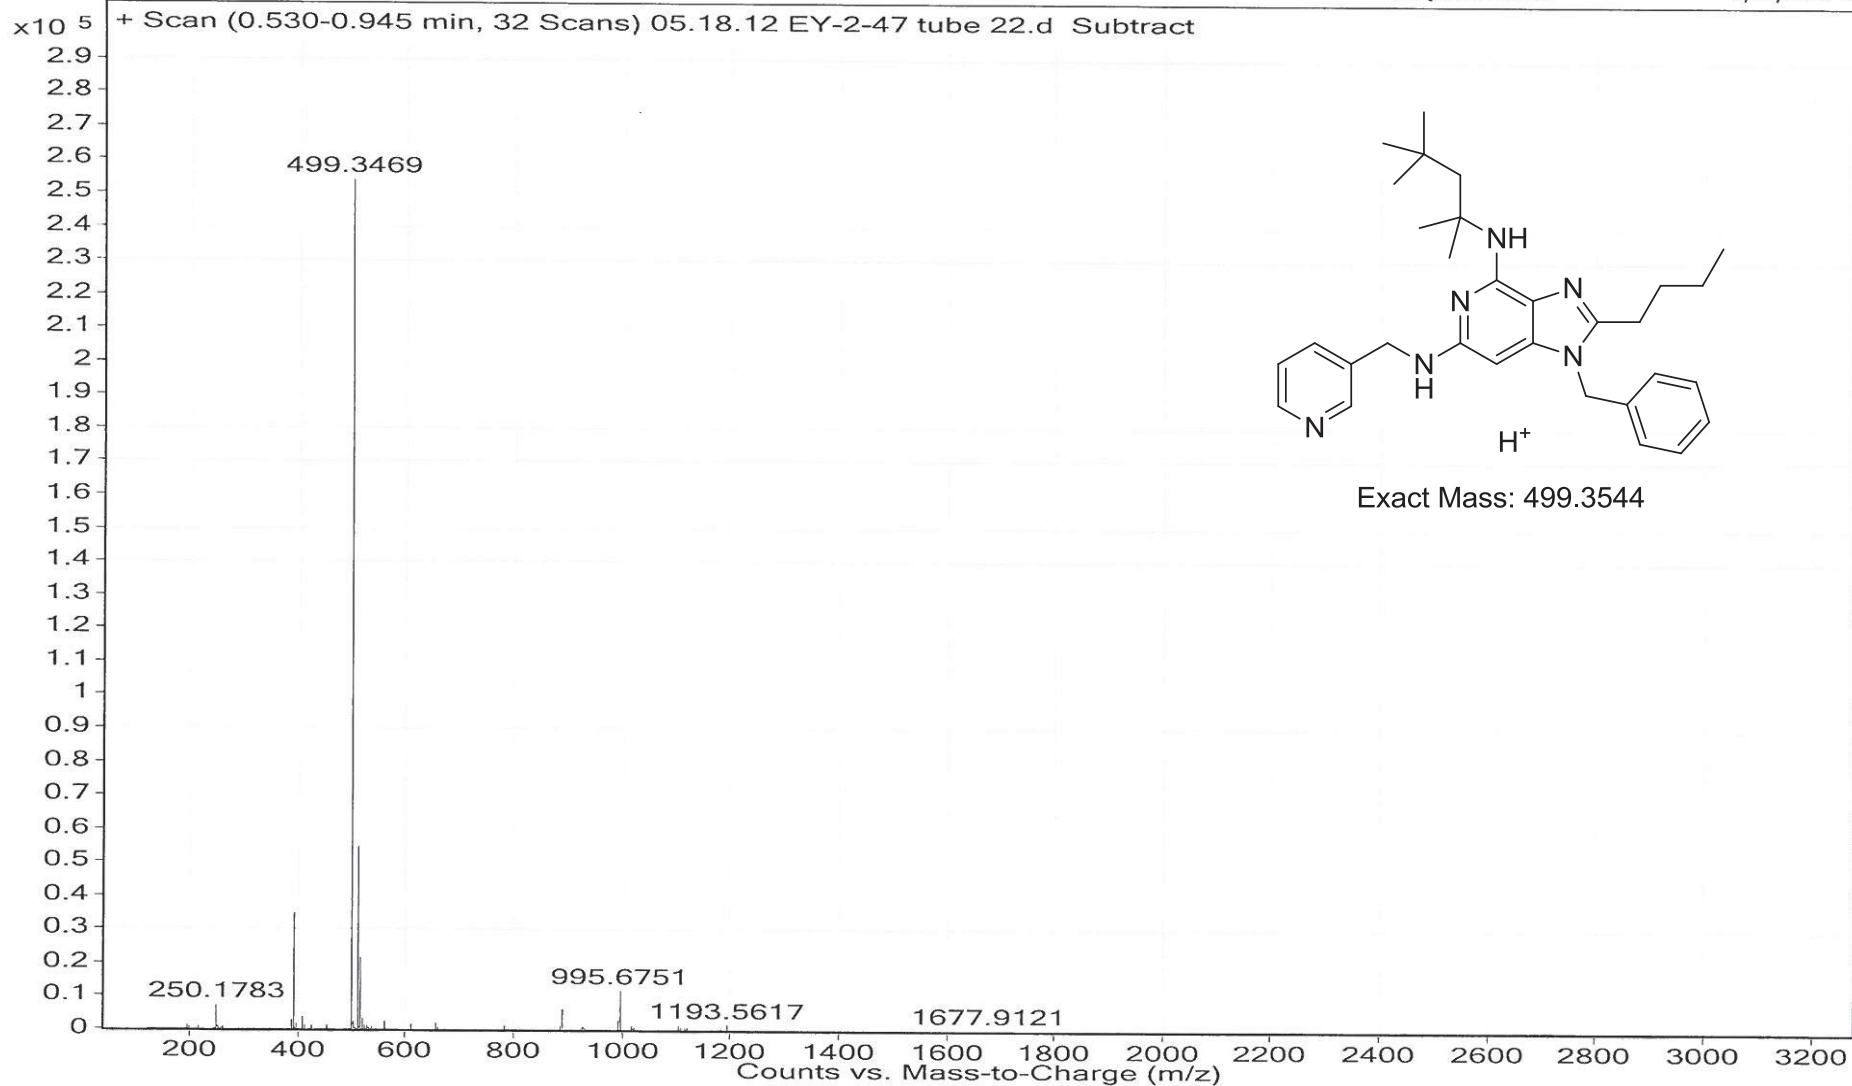

# 19m <sup>1</sup>H NMR

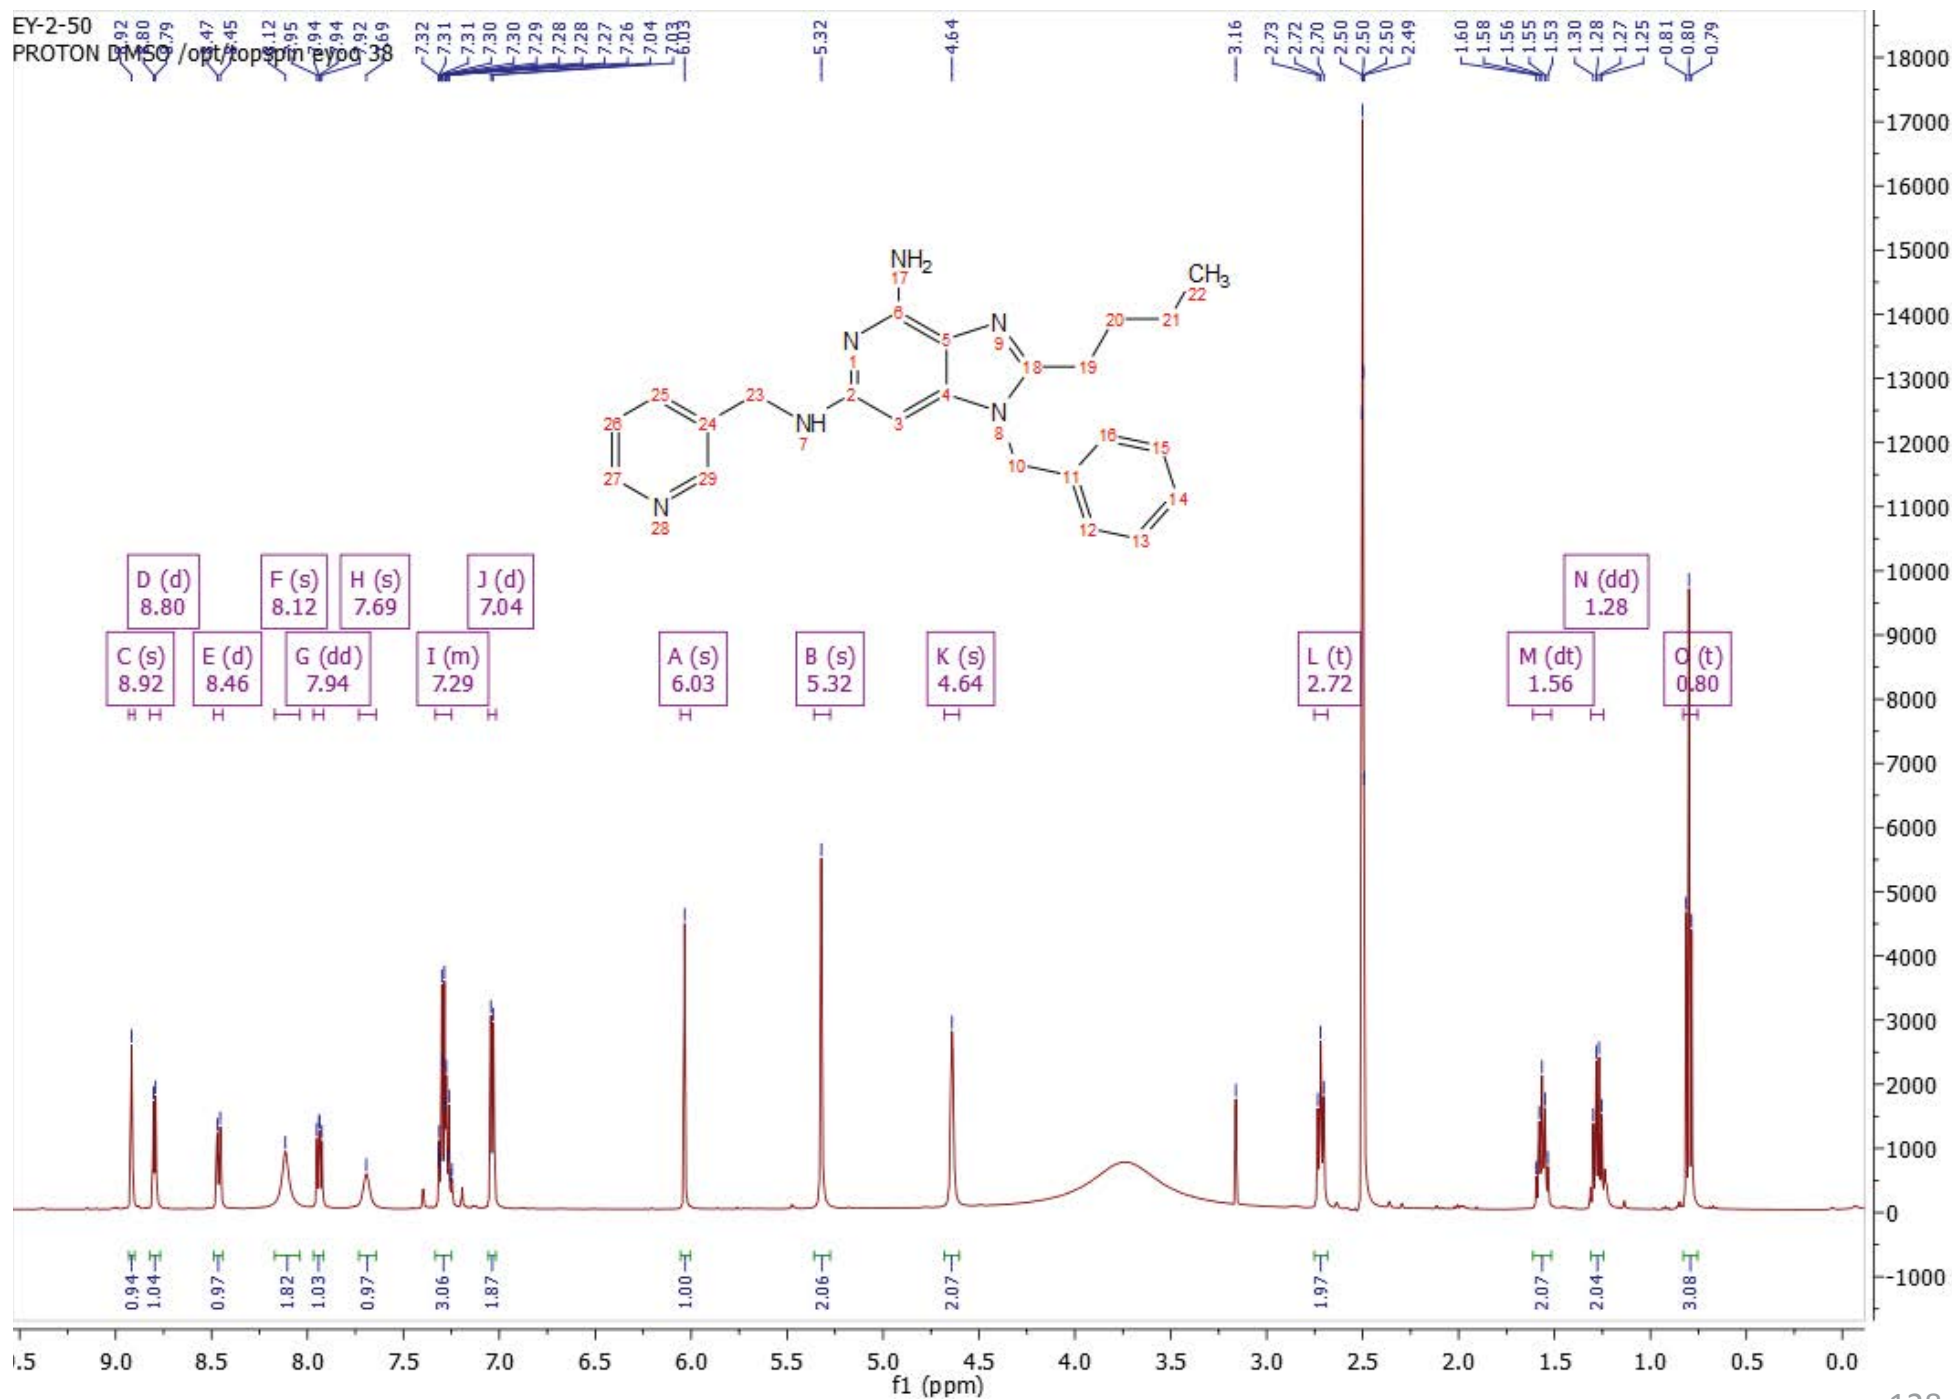

# 19m <sup>13</sup>C NMR

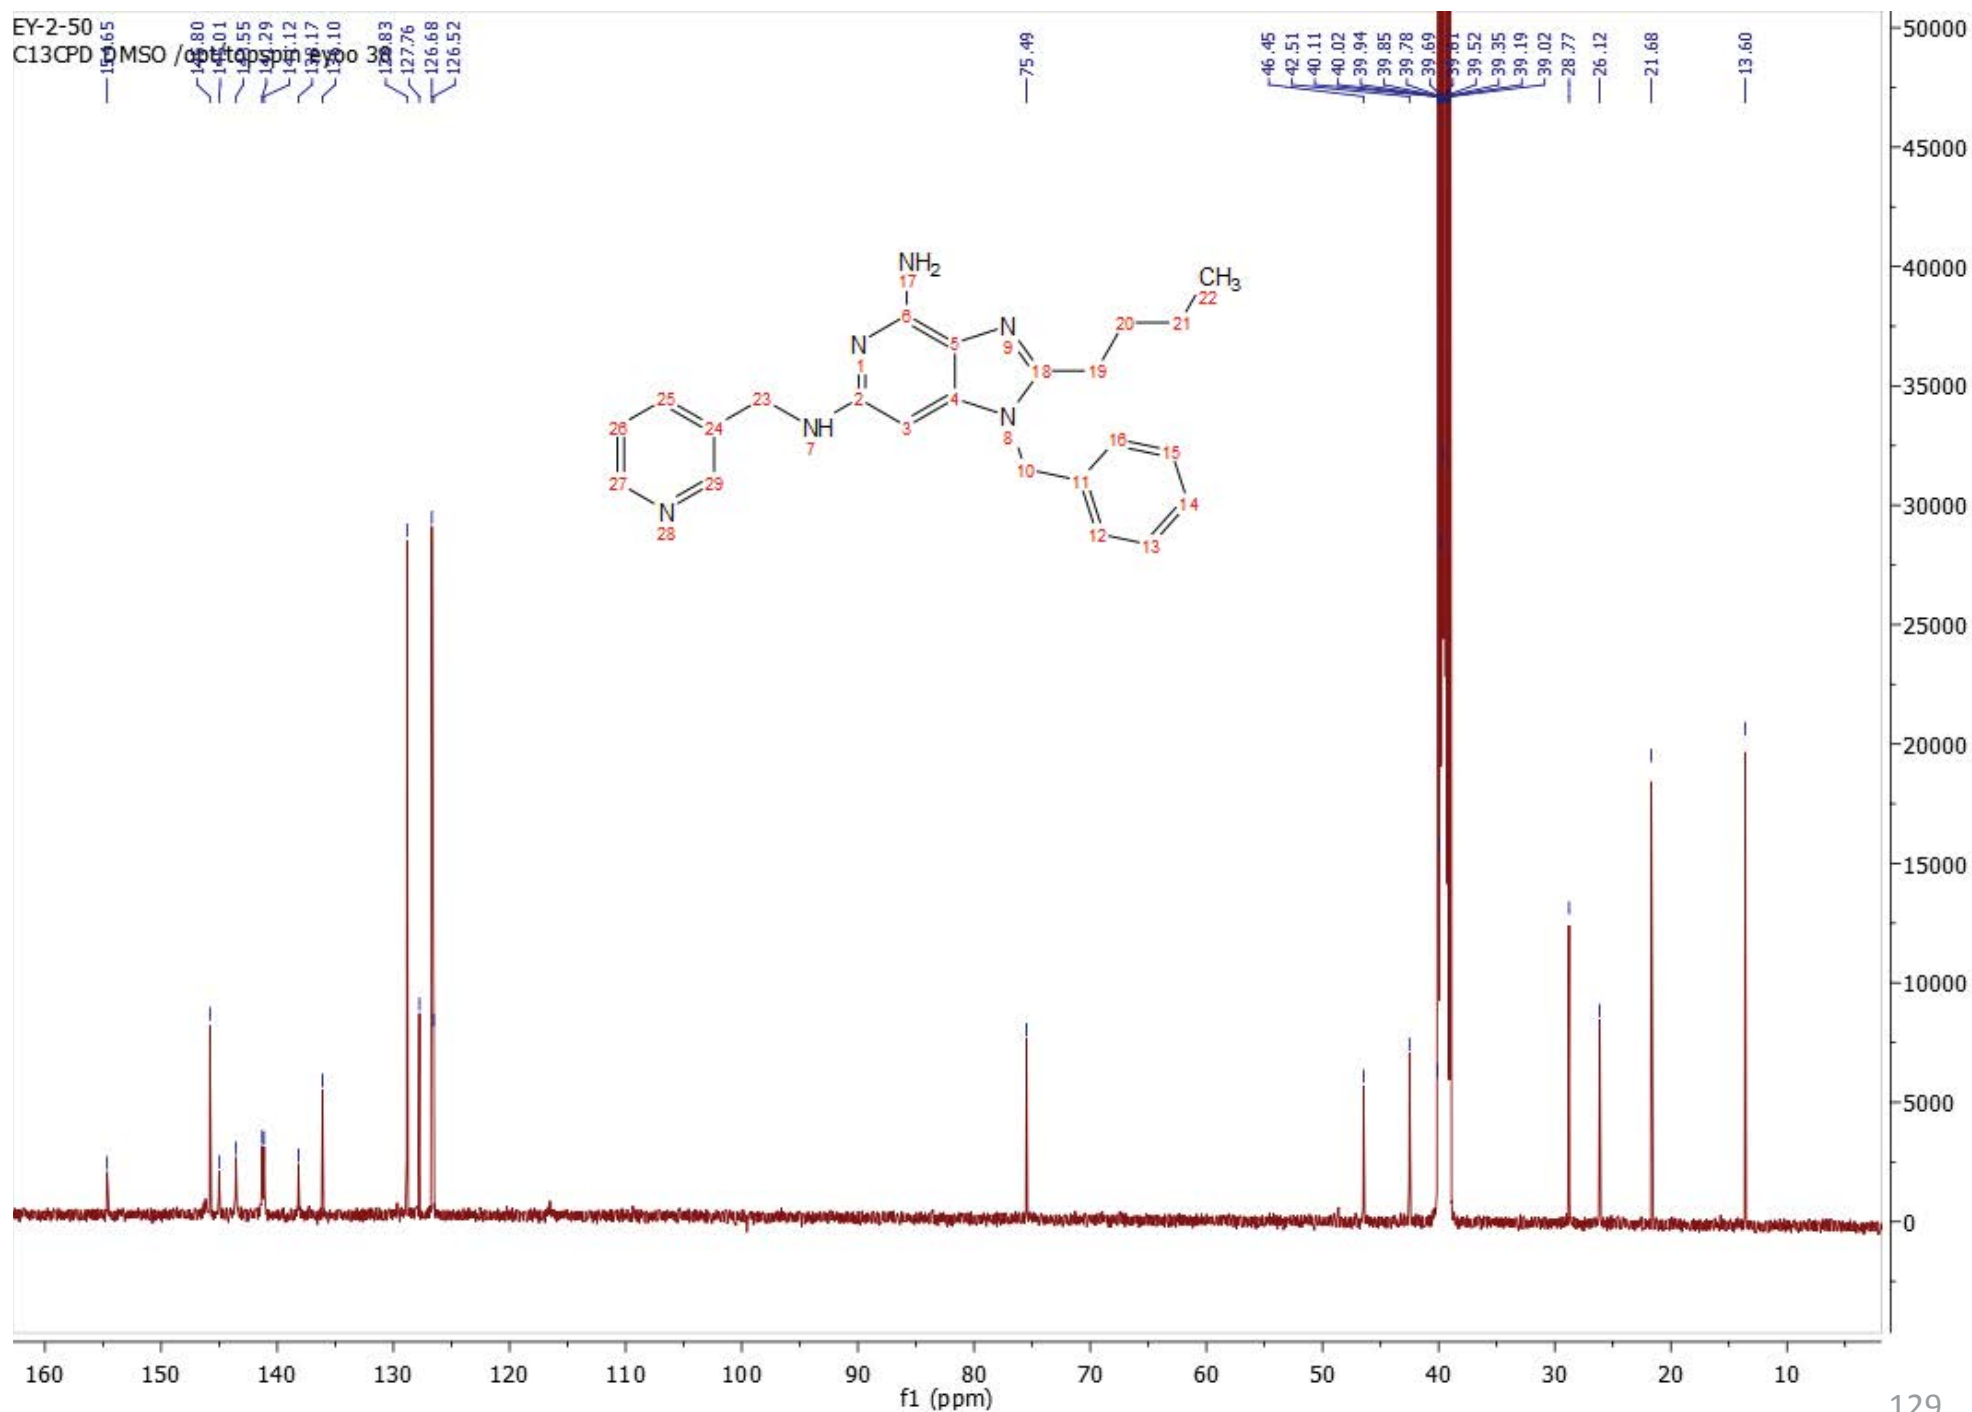

# 19m MS

|               |                      |             |                      |                 |              |                        |                       |
|---------------|----------------------|-------------|----------------------|-----------------|--------------|------------------------|-----------------------|
| Sample Name   | 05.21.12 EY-2-50 tub | Position    | Vial 1               | Instrument Name | Instrument 1 | User Name              |                       |
| Inj Vol       | -1                   | InjPosition |                      | SampleType      | Sample       | IRM Calibration Status | Success               |
| Data Filename | 05.21.12 EY-2-50 tub | ACQ Method  | Water-ACN Infusion M | Comment         |              | Acquired Time          | 5/21/2012 10:28:35 AM |

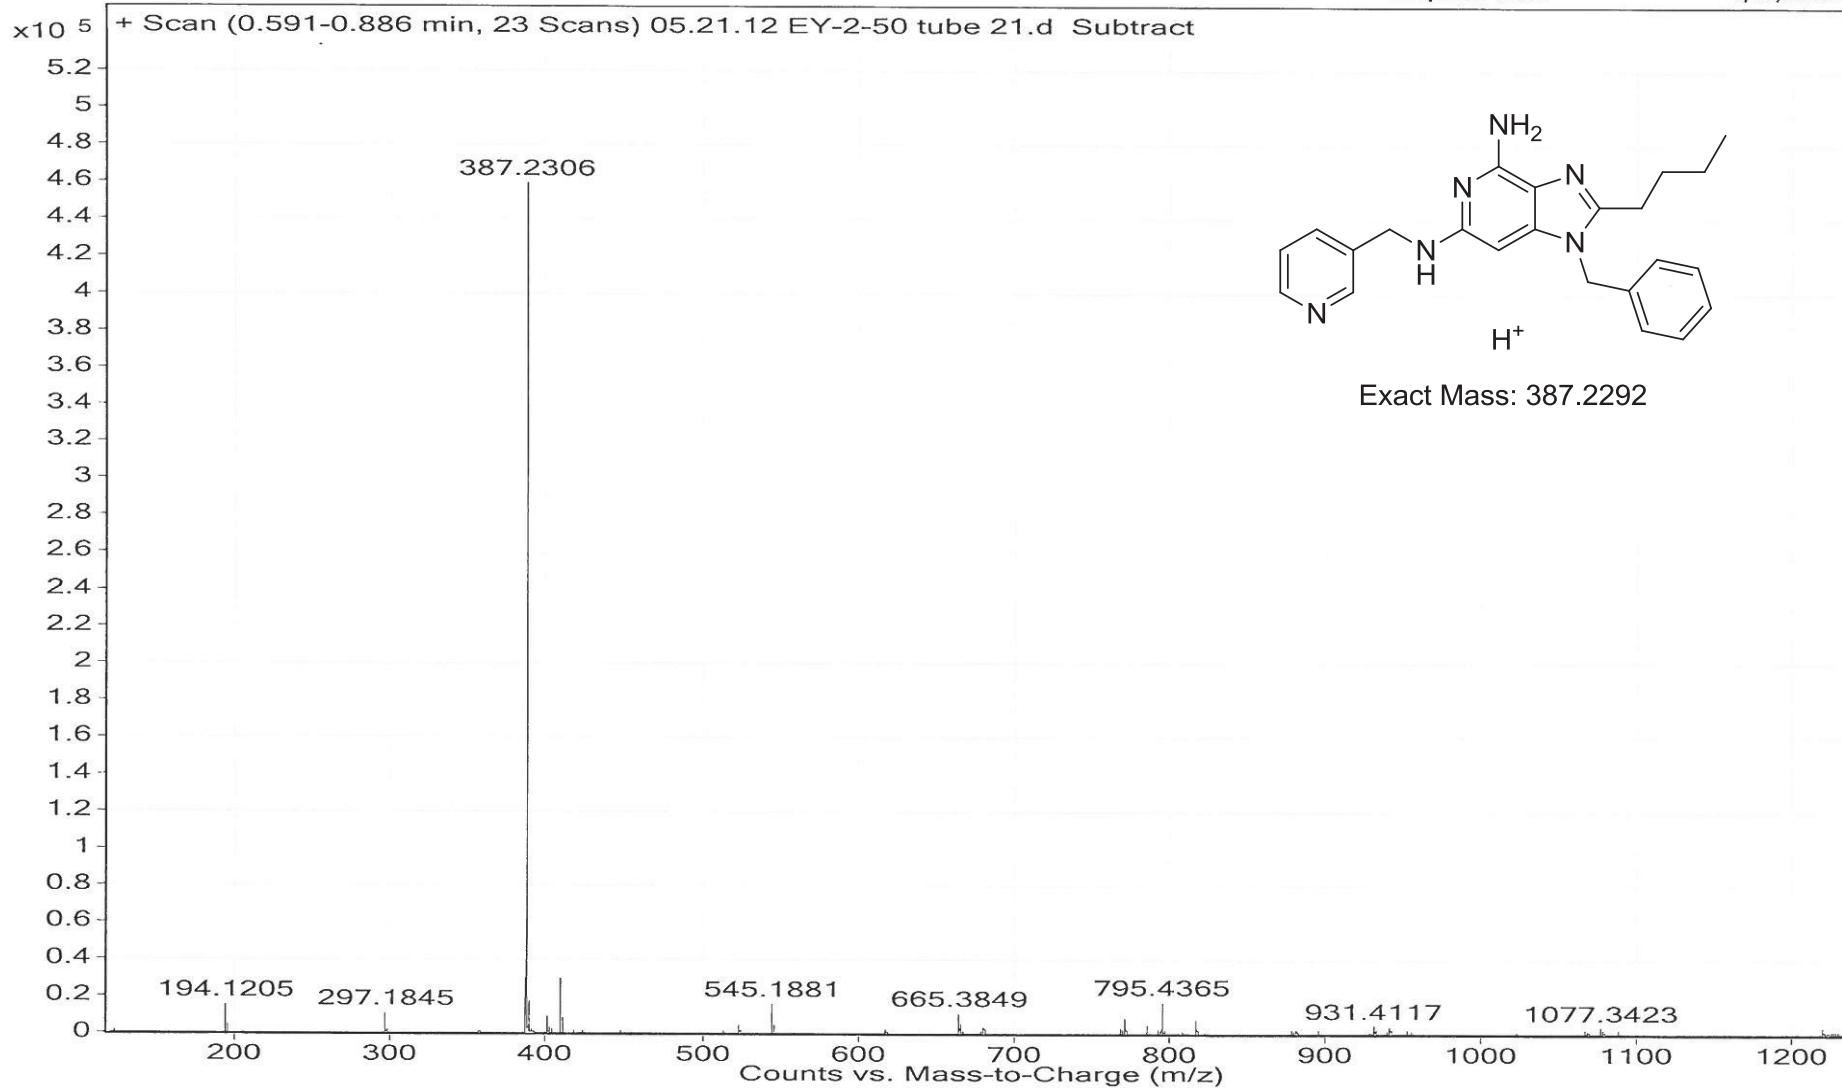

# 19m LC-MS

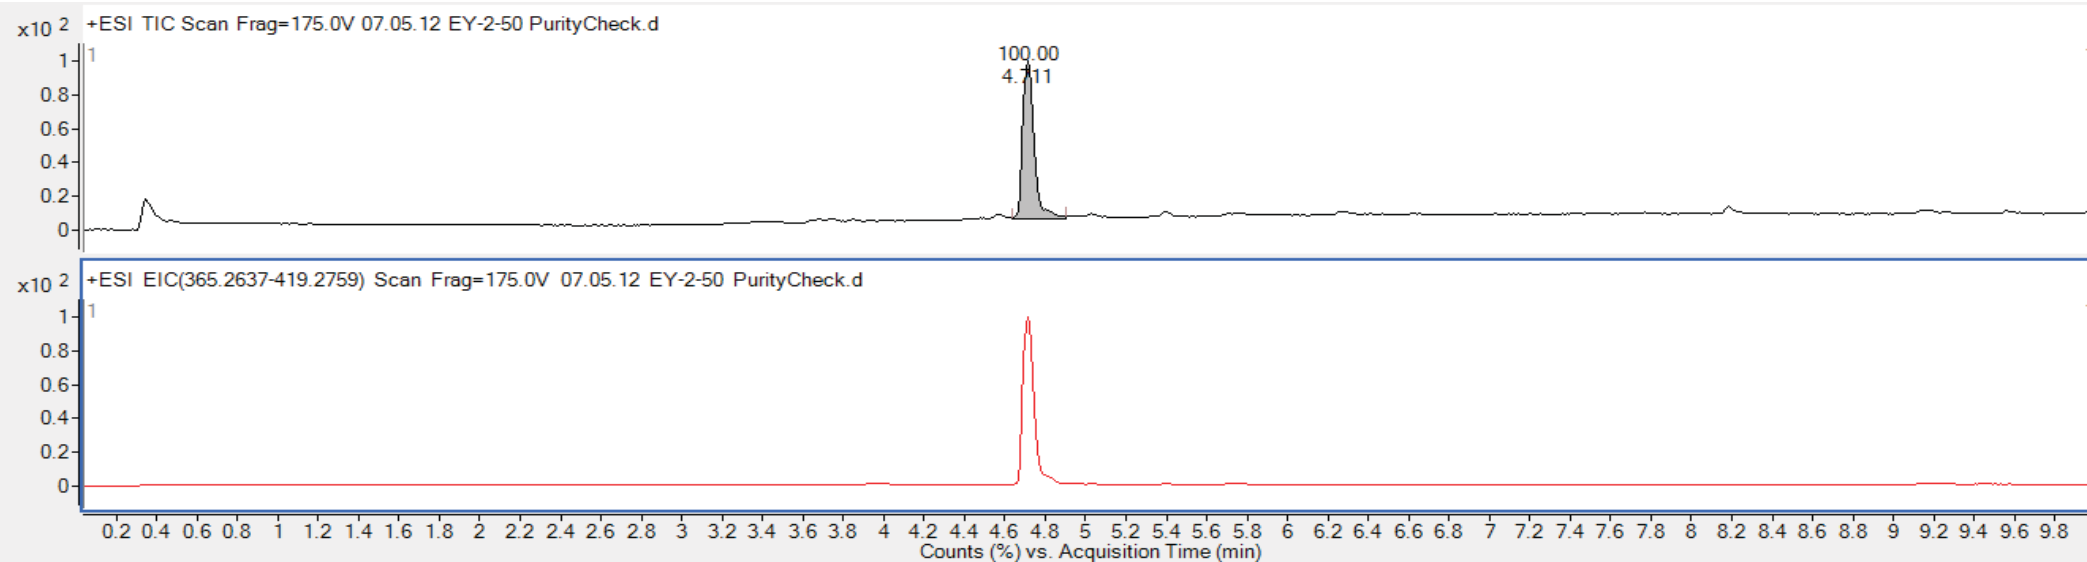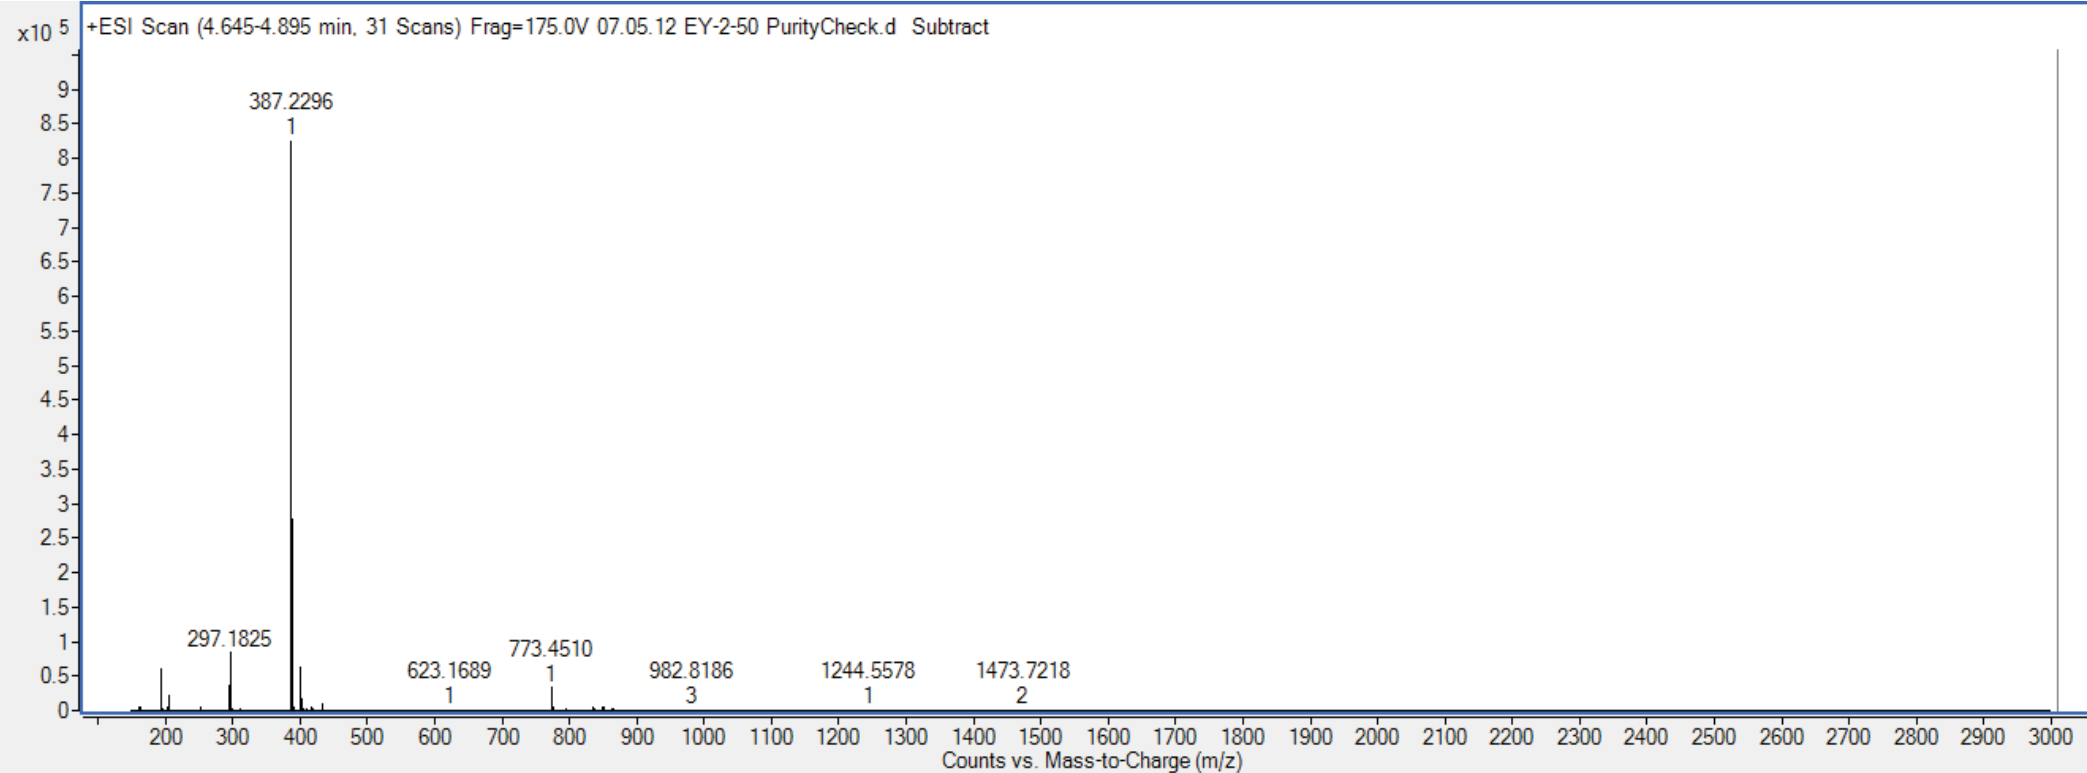



# 18n MS

|               |                    |             |                      |                 |              |                        |                      |
|---------------|--------------------|-------------|----------------------|-----------------|--------------|------------------------|----------------------|
| Sample Name   | 05.23.12 EY-2-58   | Position    | Vial 2               | Instrument Name | Instrument 1 | User Name              |                      |
| Inj Vol       | -1                 | InjPosition |                      | SampleType      | Sample       | IRM Calibration Status | Success              |
| Data Filename | 05.23.12 EY-2-58.d | ACQ Method  | Water-ACN Infusion M | Comment         |              | Acquired Time          | 5/23/2012 4:01:34 PM |

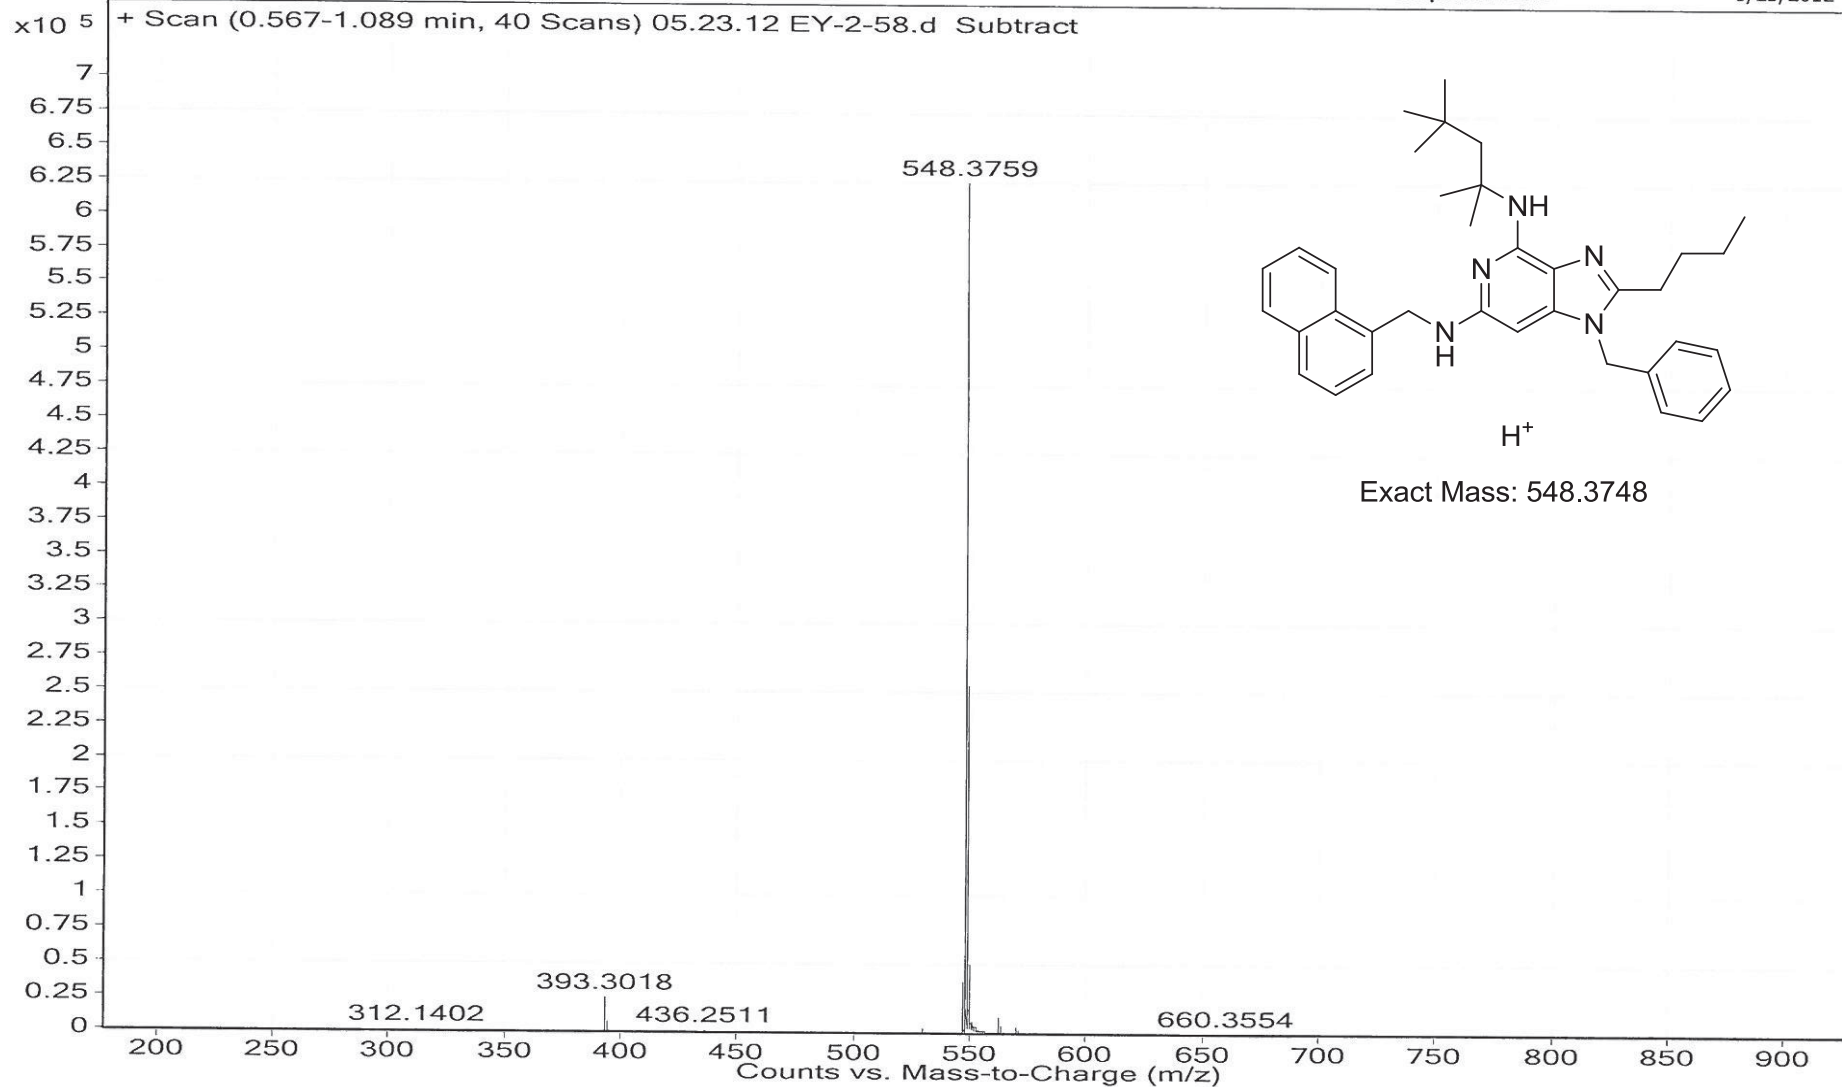

# 19n <sup>1</sup>H NMR

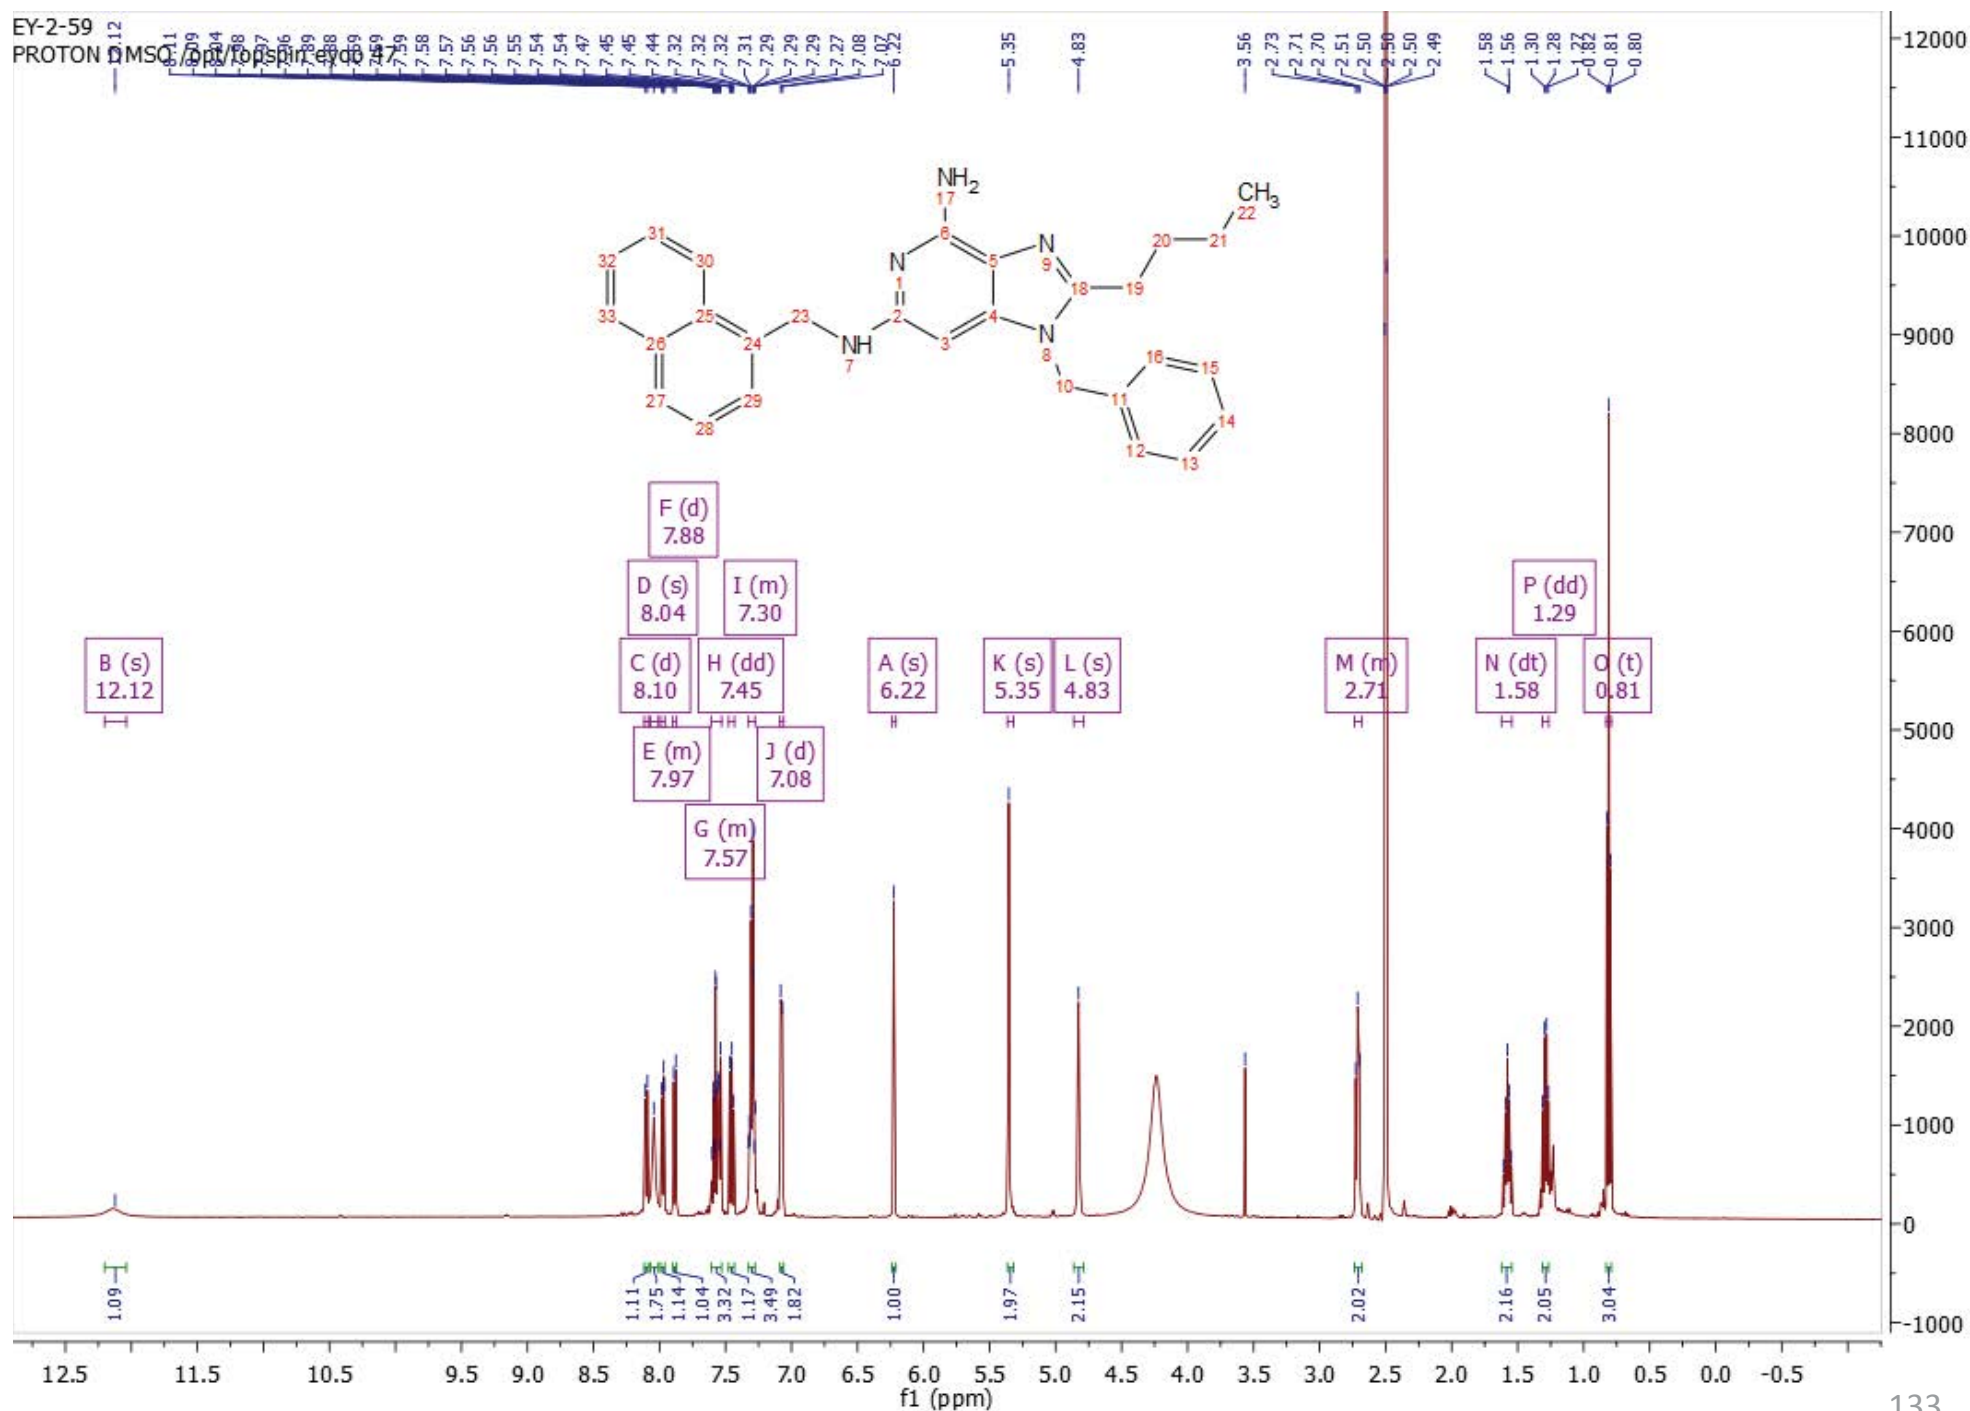

# 19n <sup>13</sup>C NMR

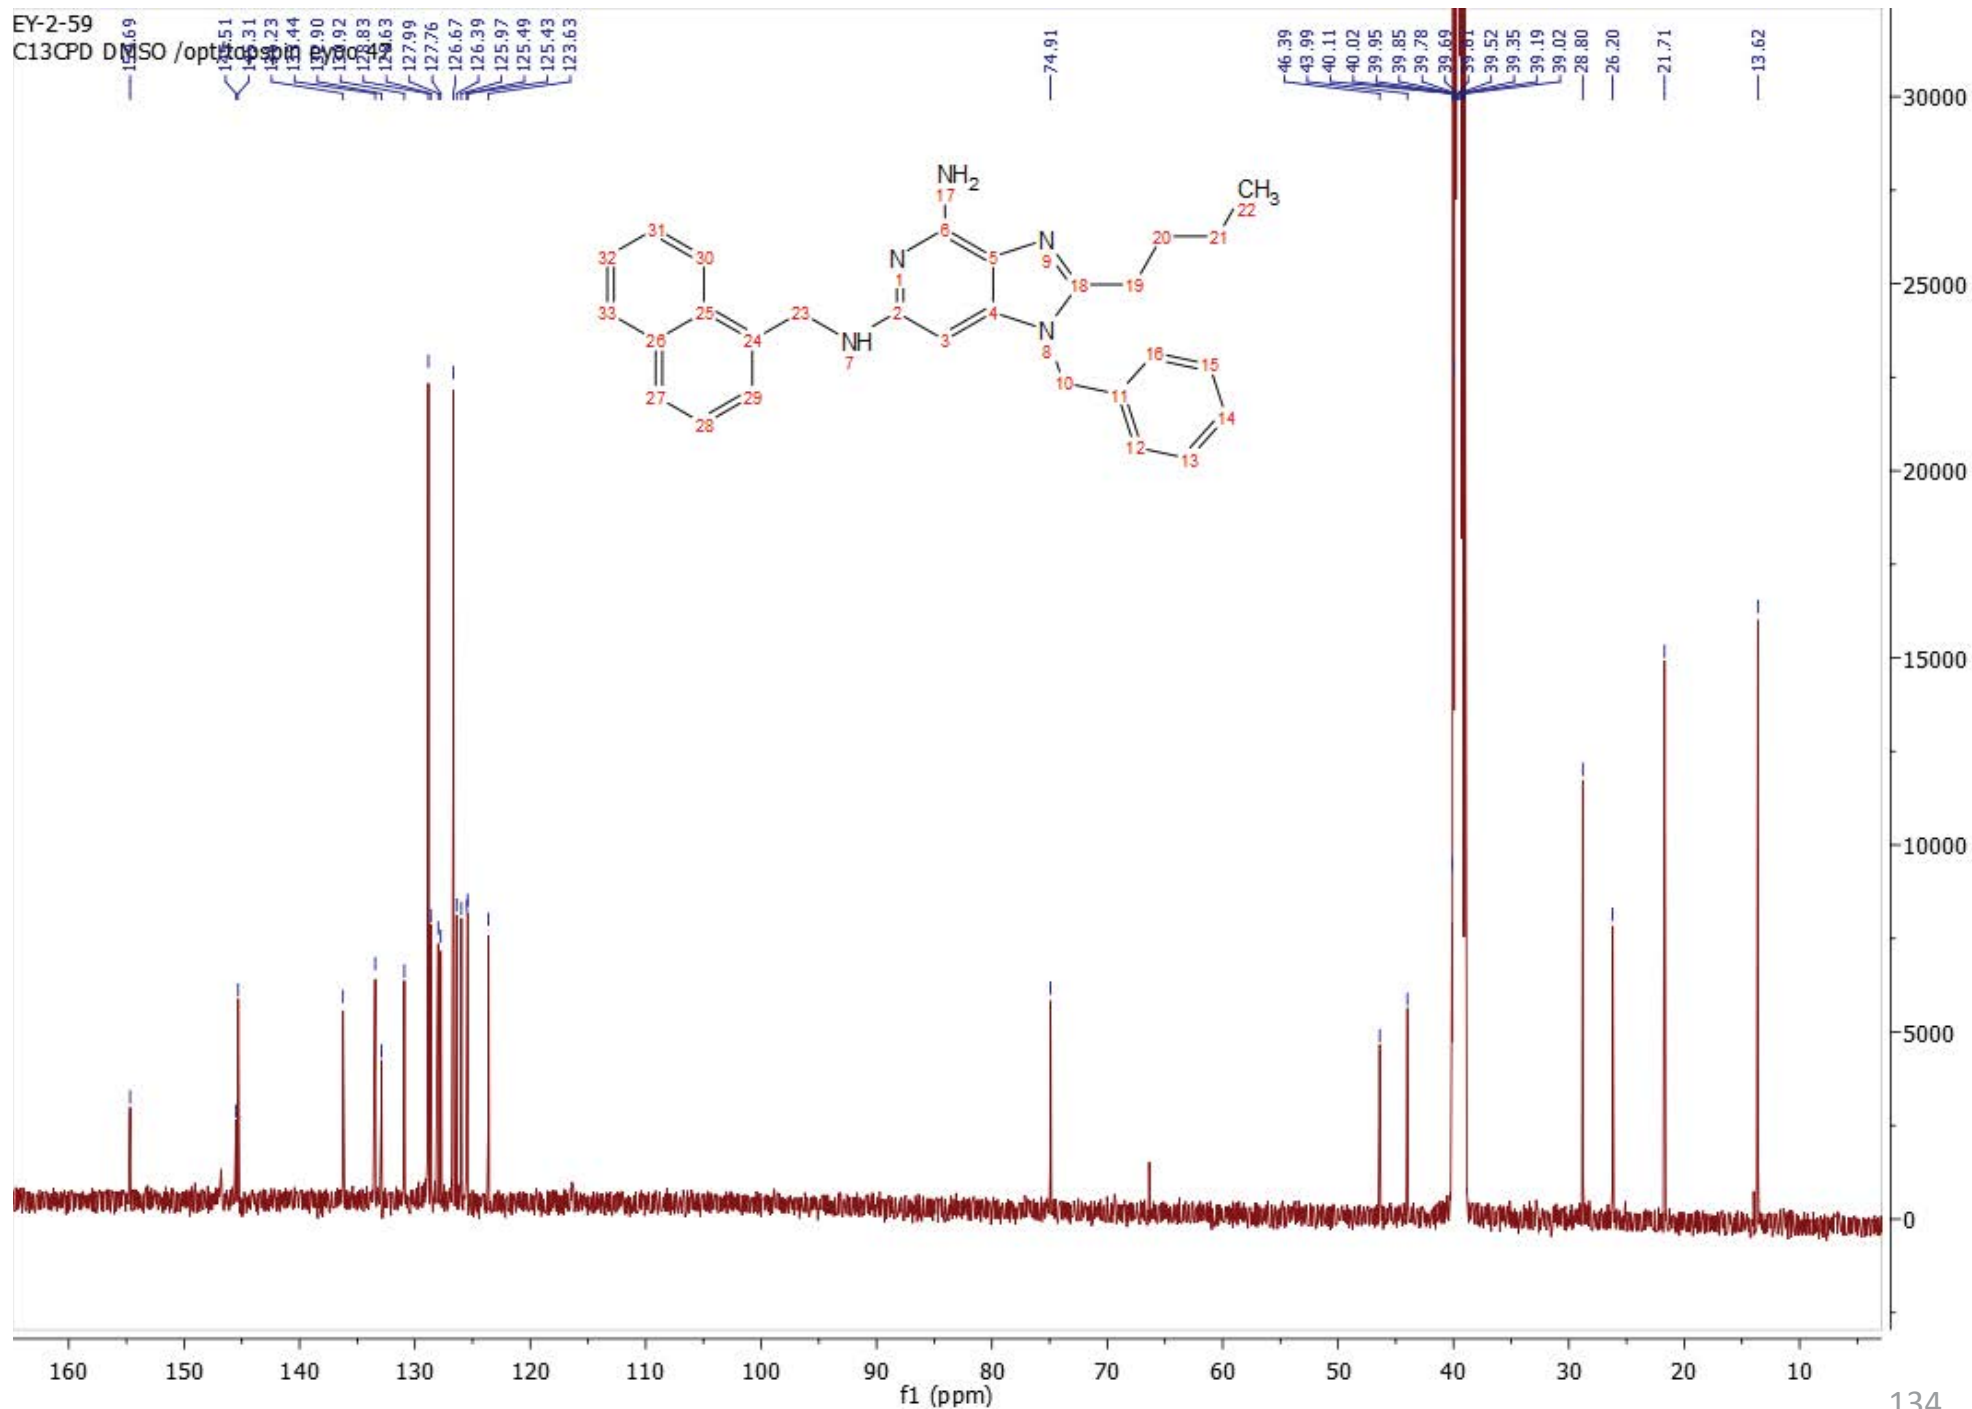

# 19n MS

|               |                    |             |                      |                 |              |                        |                      |
|---------------|--------------------|-------------|----------------------|-----------------|--------------|------------------------|----------------------|
| Sample Name   | 05.23.12 EY-2-59   | Position    | Vial 1               | Instrument Name | Instrument 1 | User Name              |                      |
| Inj Vol       | -1                 | InjPosition |                      | SampleType      | Sample       | IRM Calibration Status | Success              |
| Data Filename | 05.23.12 EY-2-59.d | ACQ Method  | Water-ACN Infusion M | Comment         |              | Acquired Time          | 5/23/2012 5:13:39 PM |

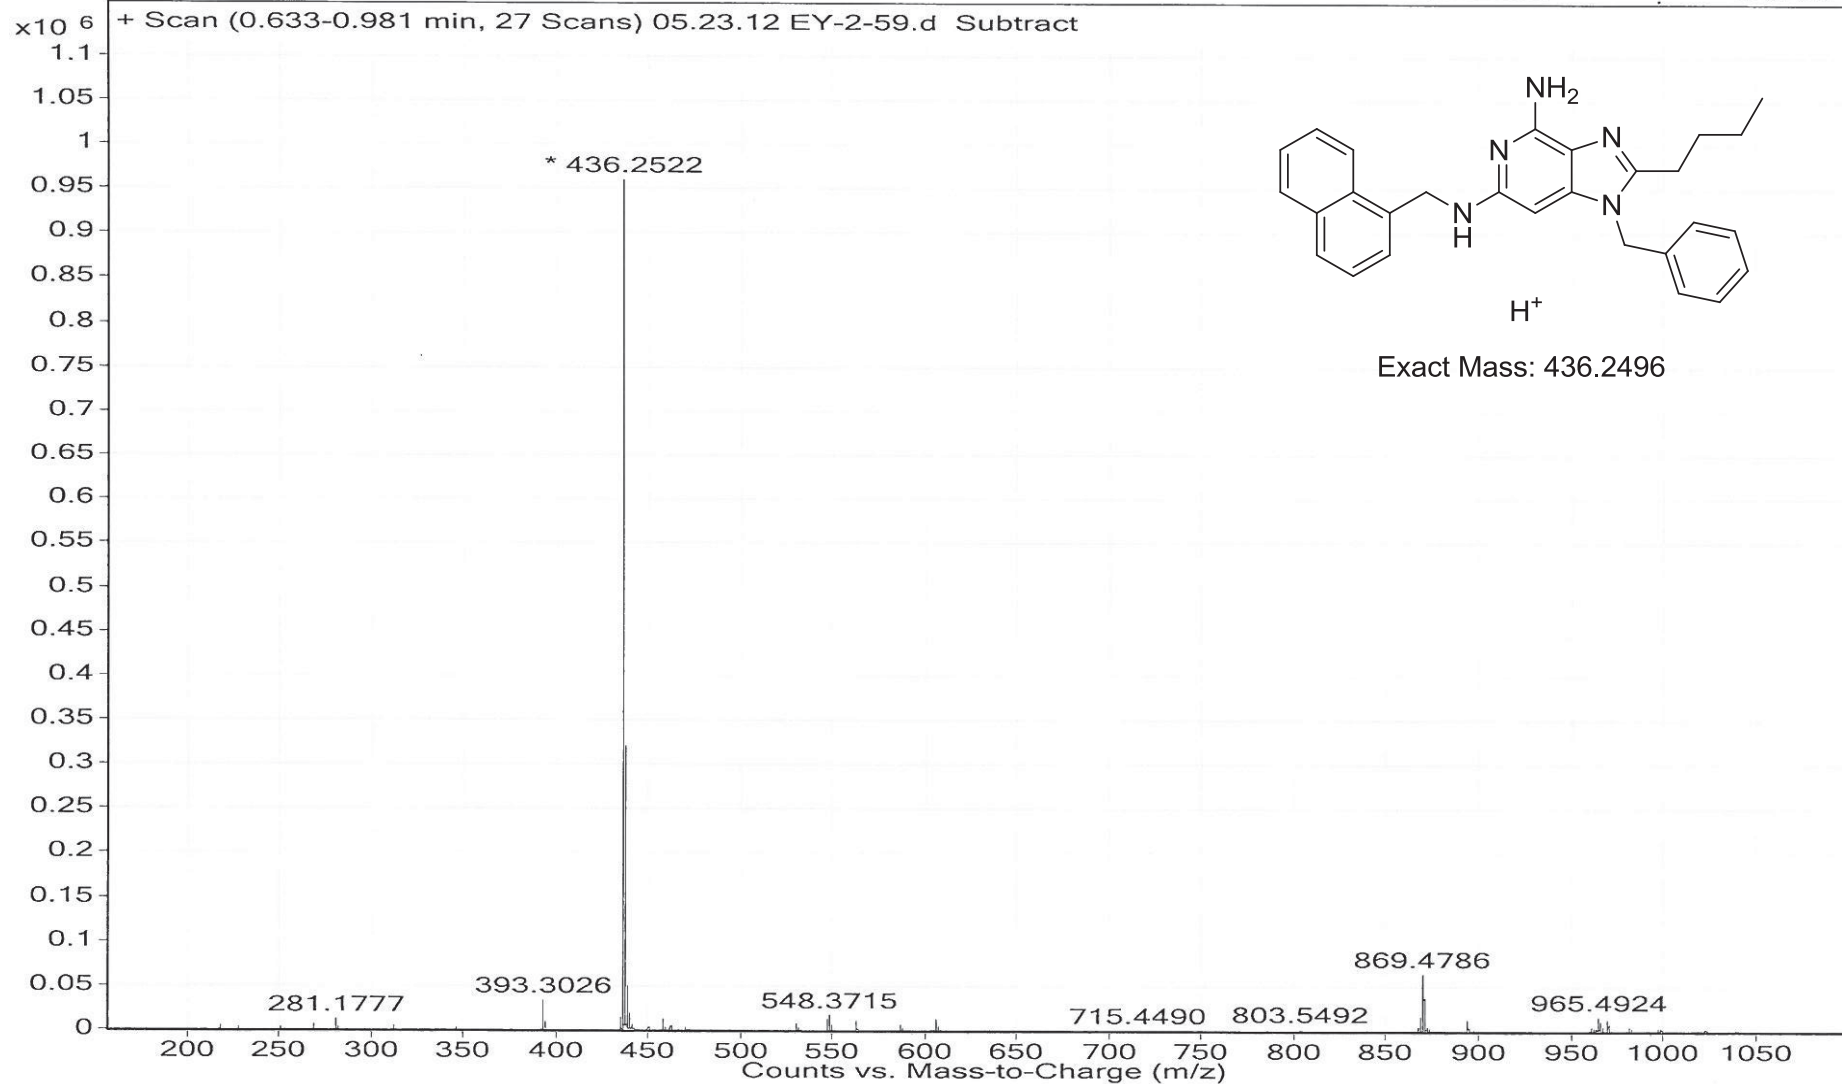

# 19n LC-MS

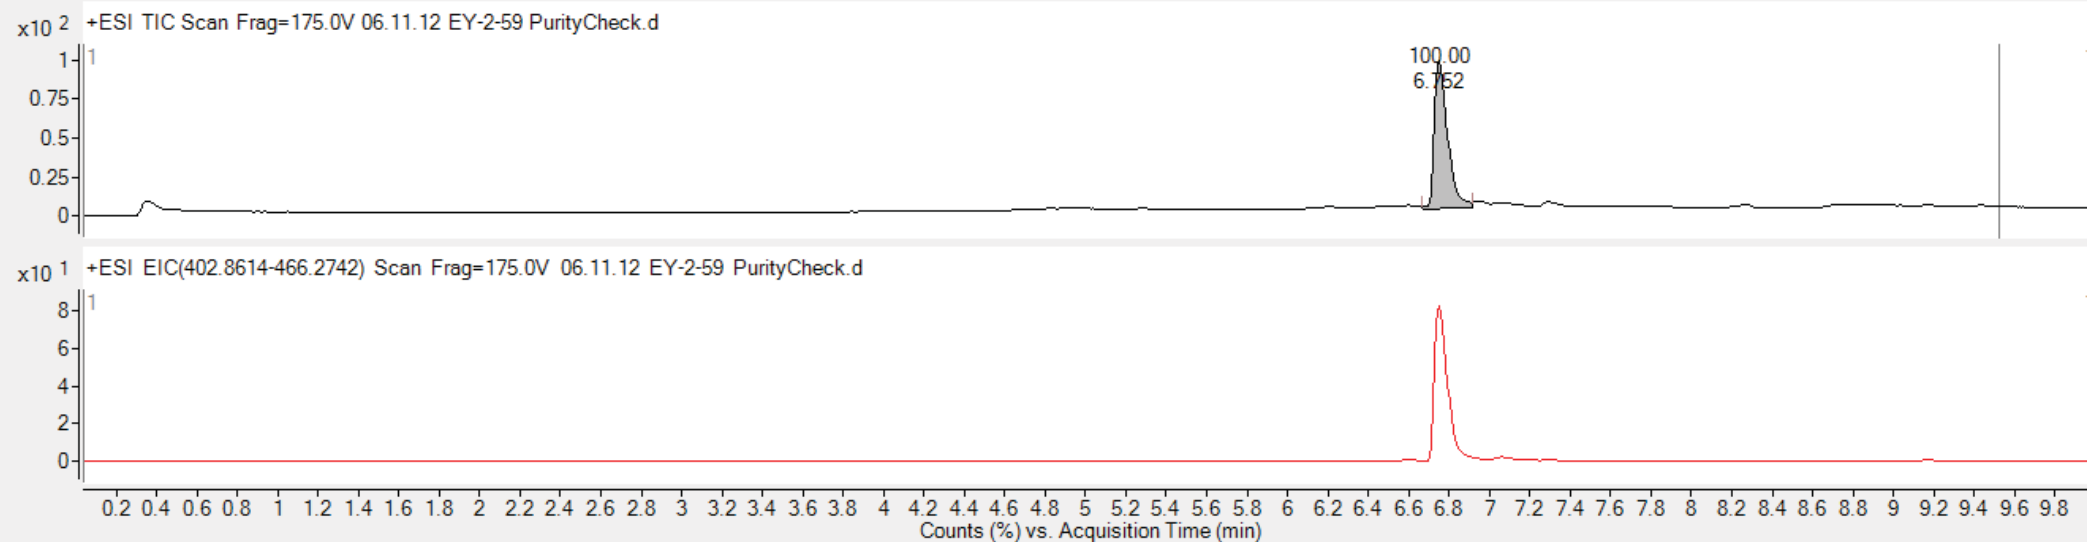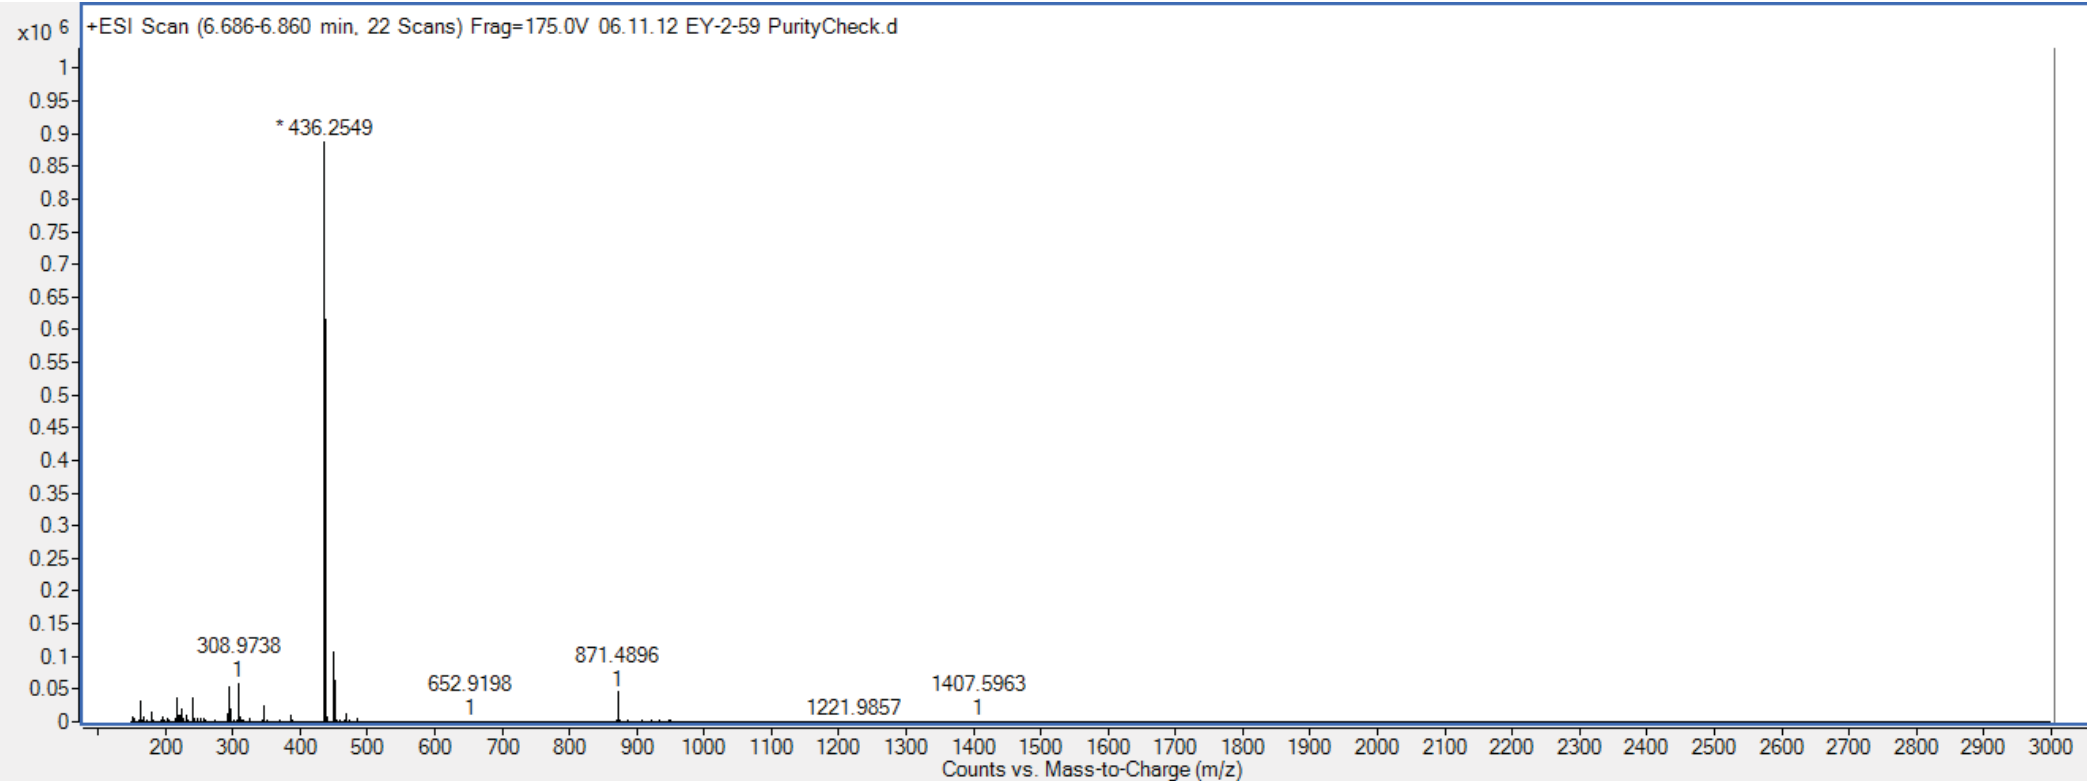

# 180 MS

|               |                    |             |                      |                 |              |                        |                      |
|---------------|--------------------|-------------|----------------------|-----------------|--------------|------------------------|----------------------|
| Sample Name   | 05.29.12 EY-2-64   | Position    | Vial 3               | Instrument Name | Instrument 1 | User Name              |                      |
| Inj Vol       | -1                 | InjPosition |                      | SampleType      | Sample       | IRM Calibration Status | Success              |
| Data Filename | 05.29.12 EY-2-64.d | ACQ Method  | Water-ACN Infusion M | Comment         |              | Acquired Time          | 5/29/2012 3:21:30 PM |

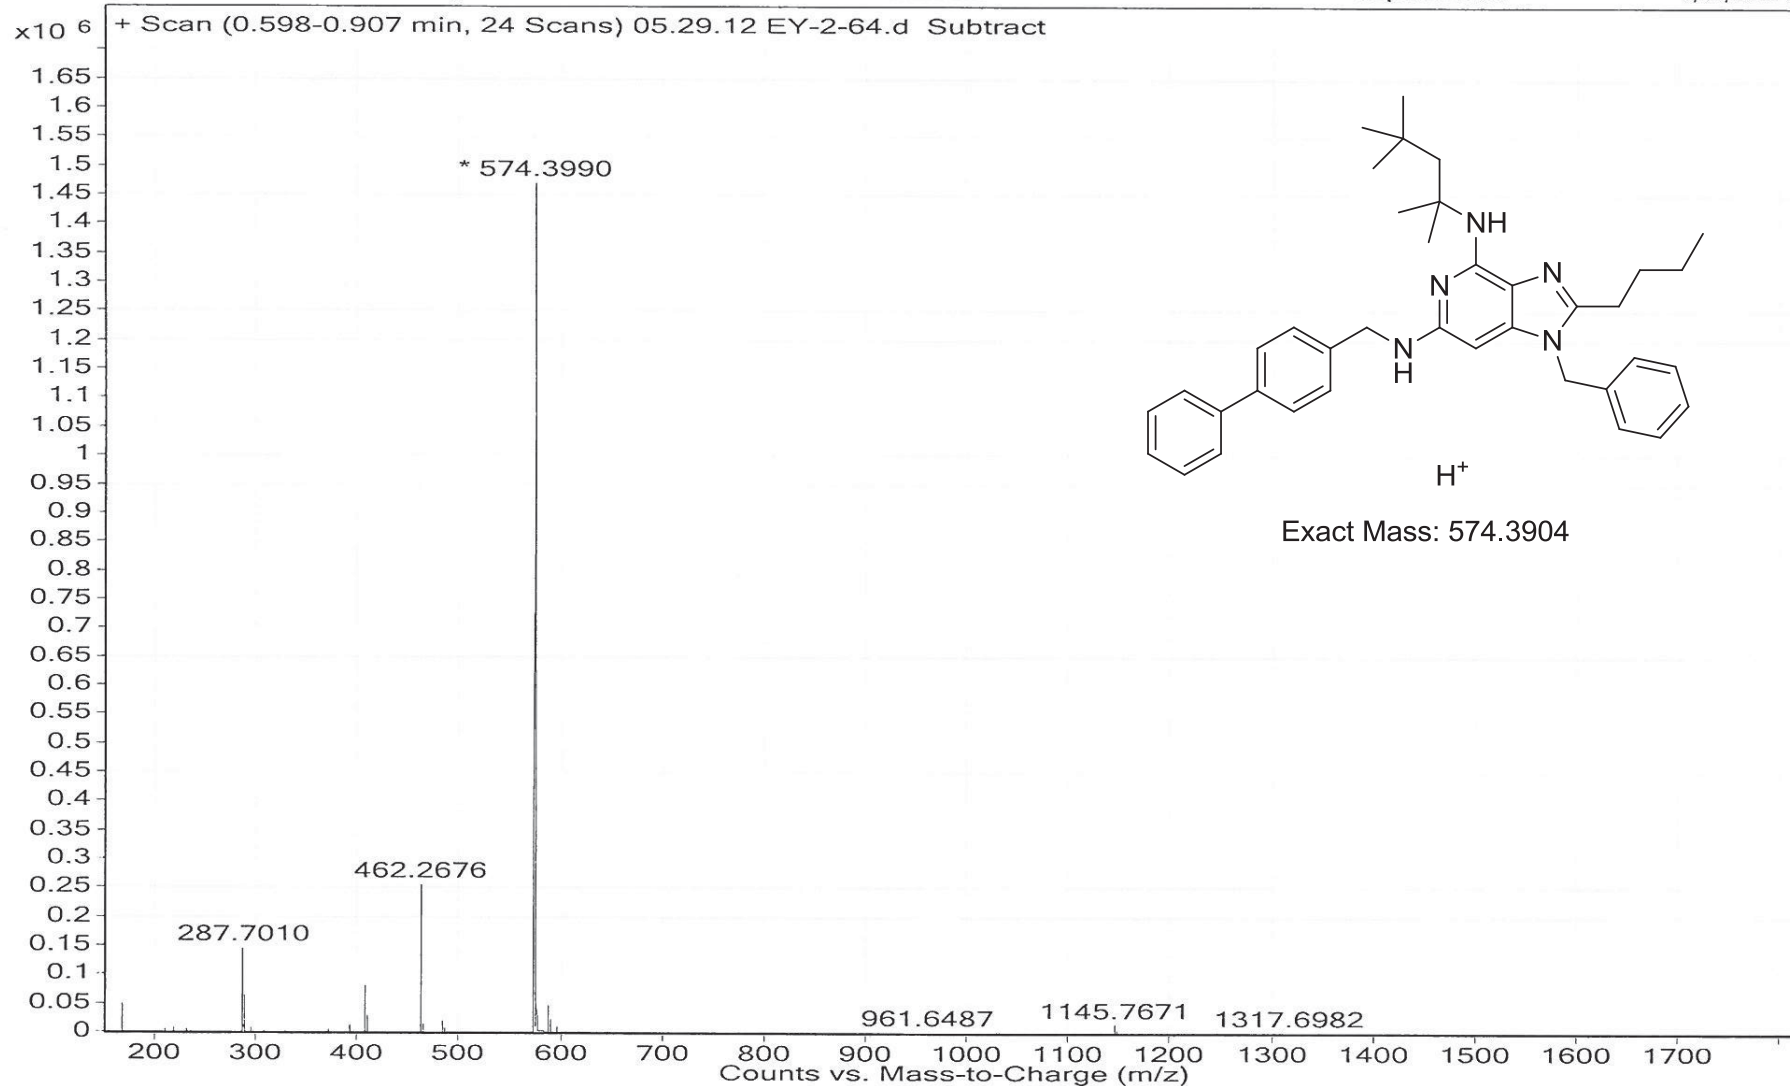



# 190 <sup>1</sup>H NMR

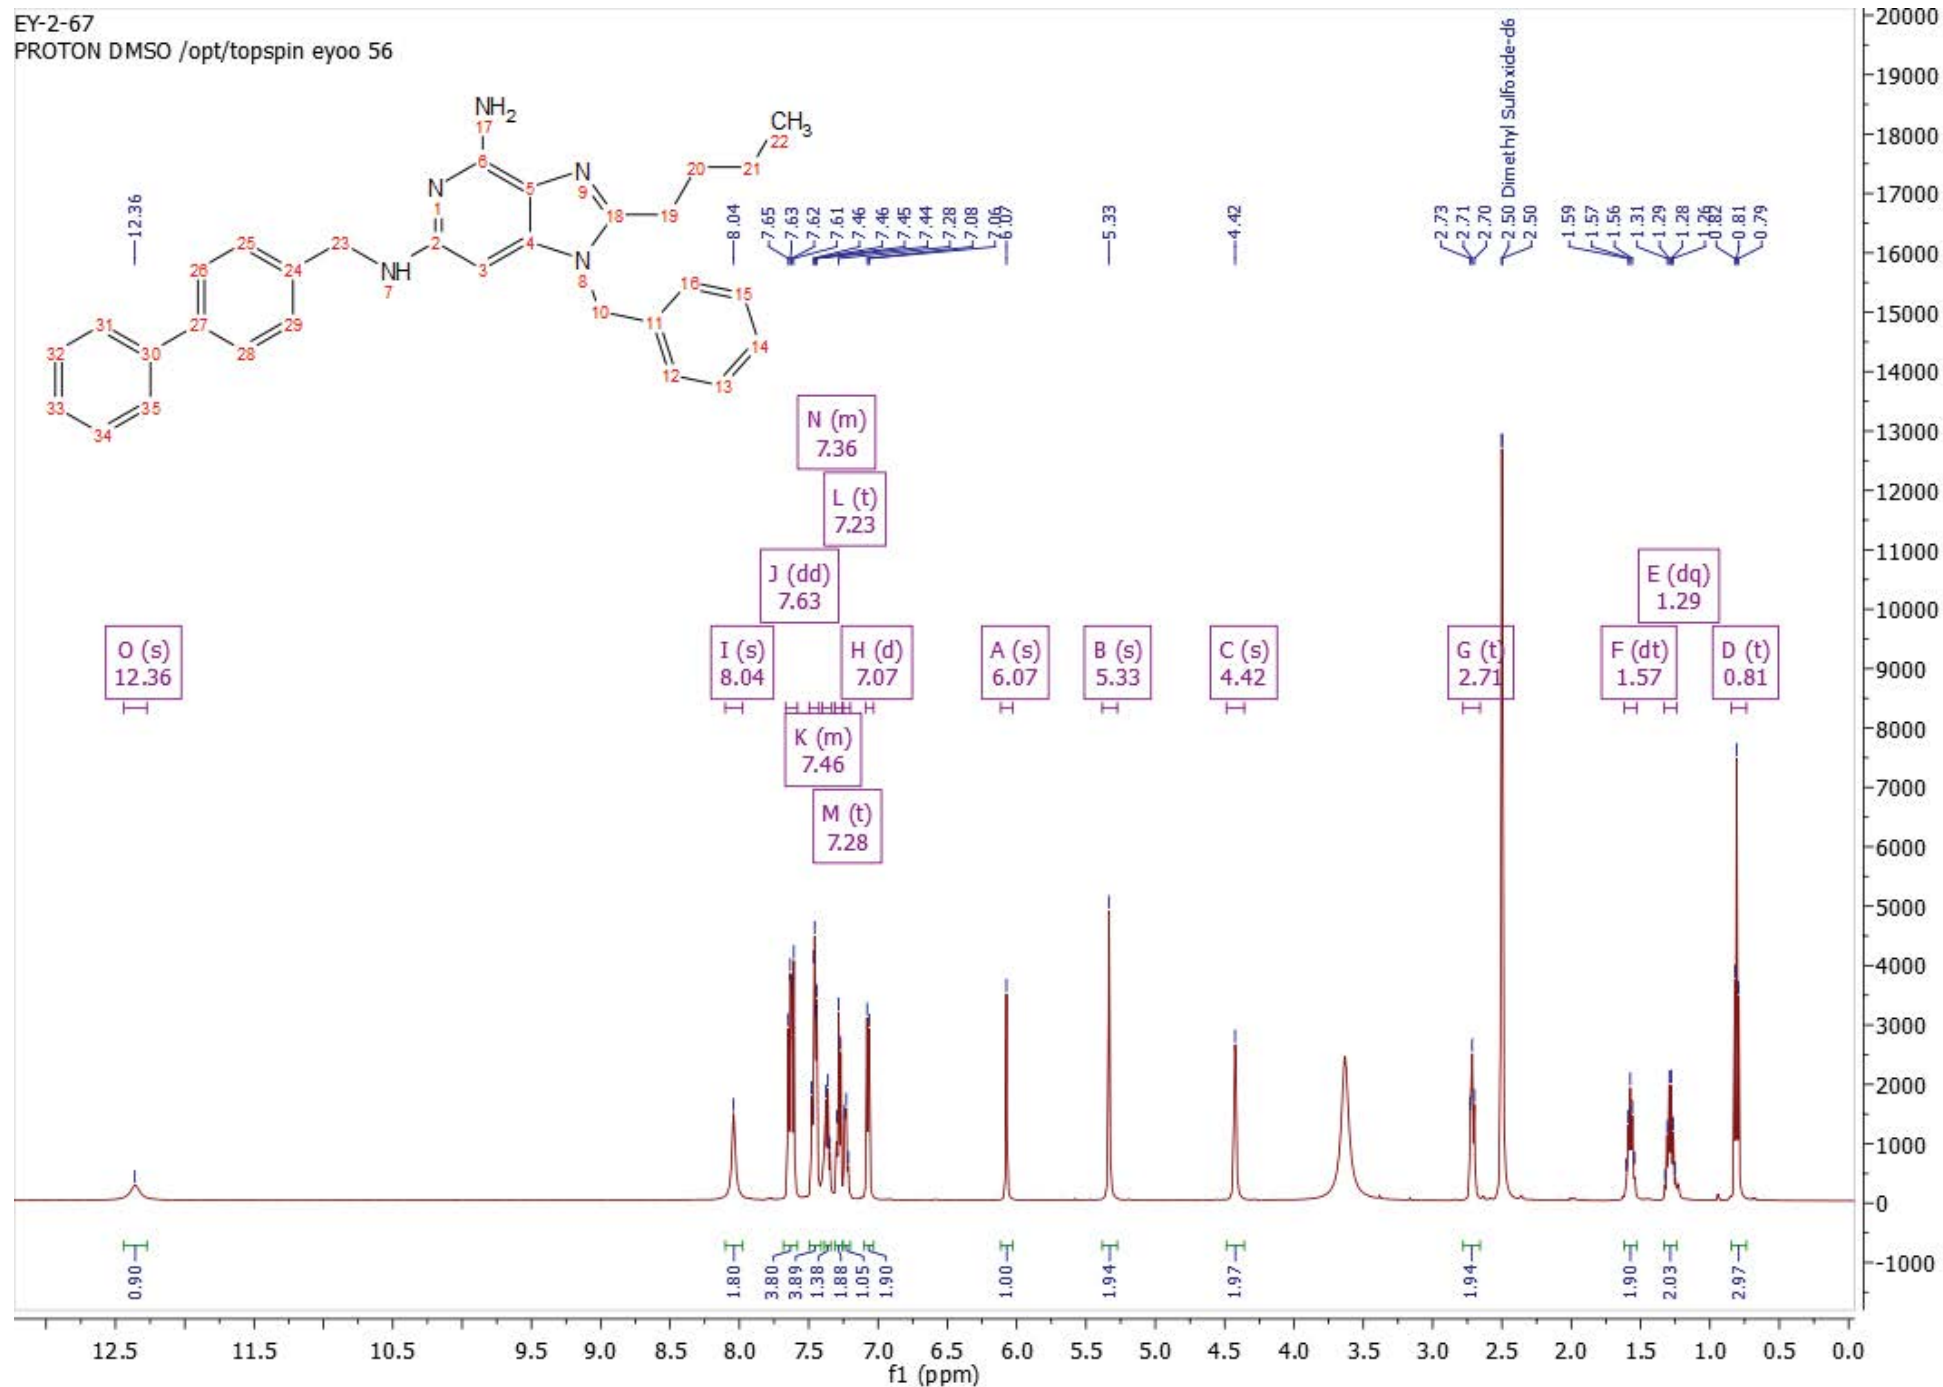



# **190** <sup>13</sup>C NMR

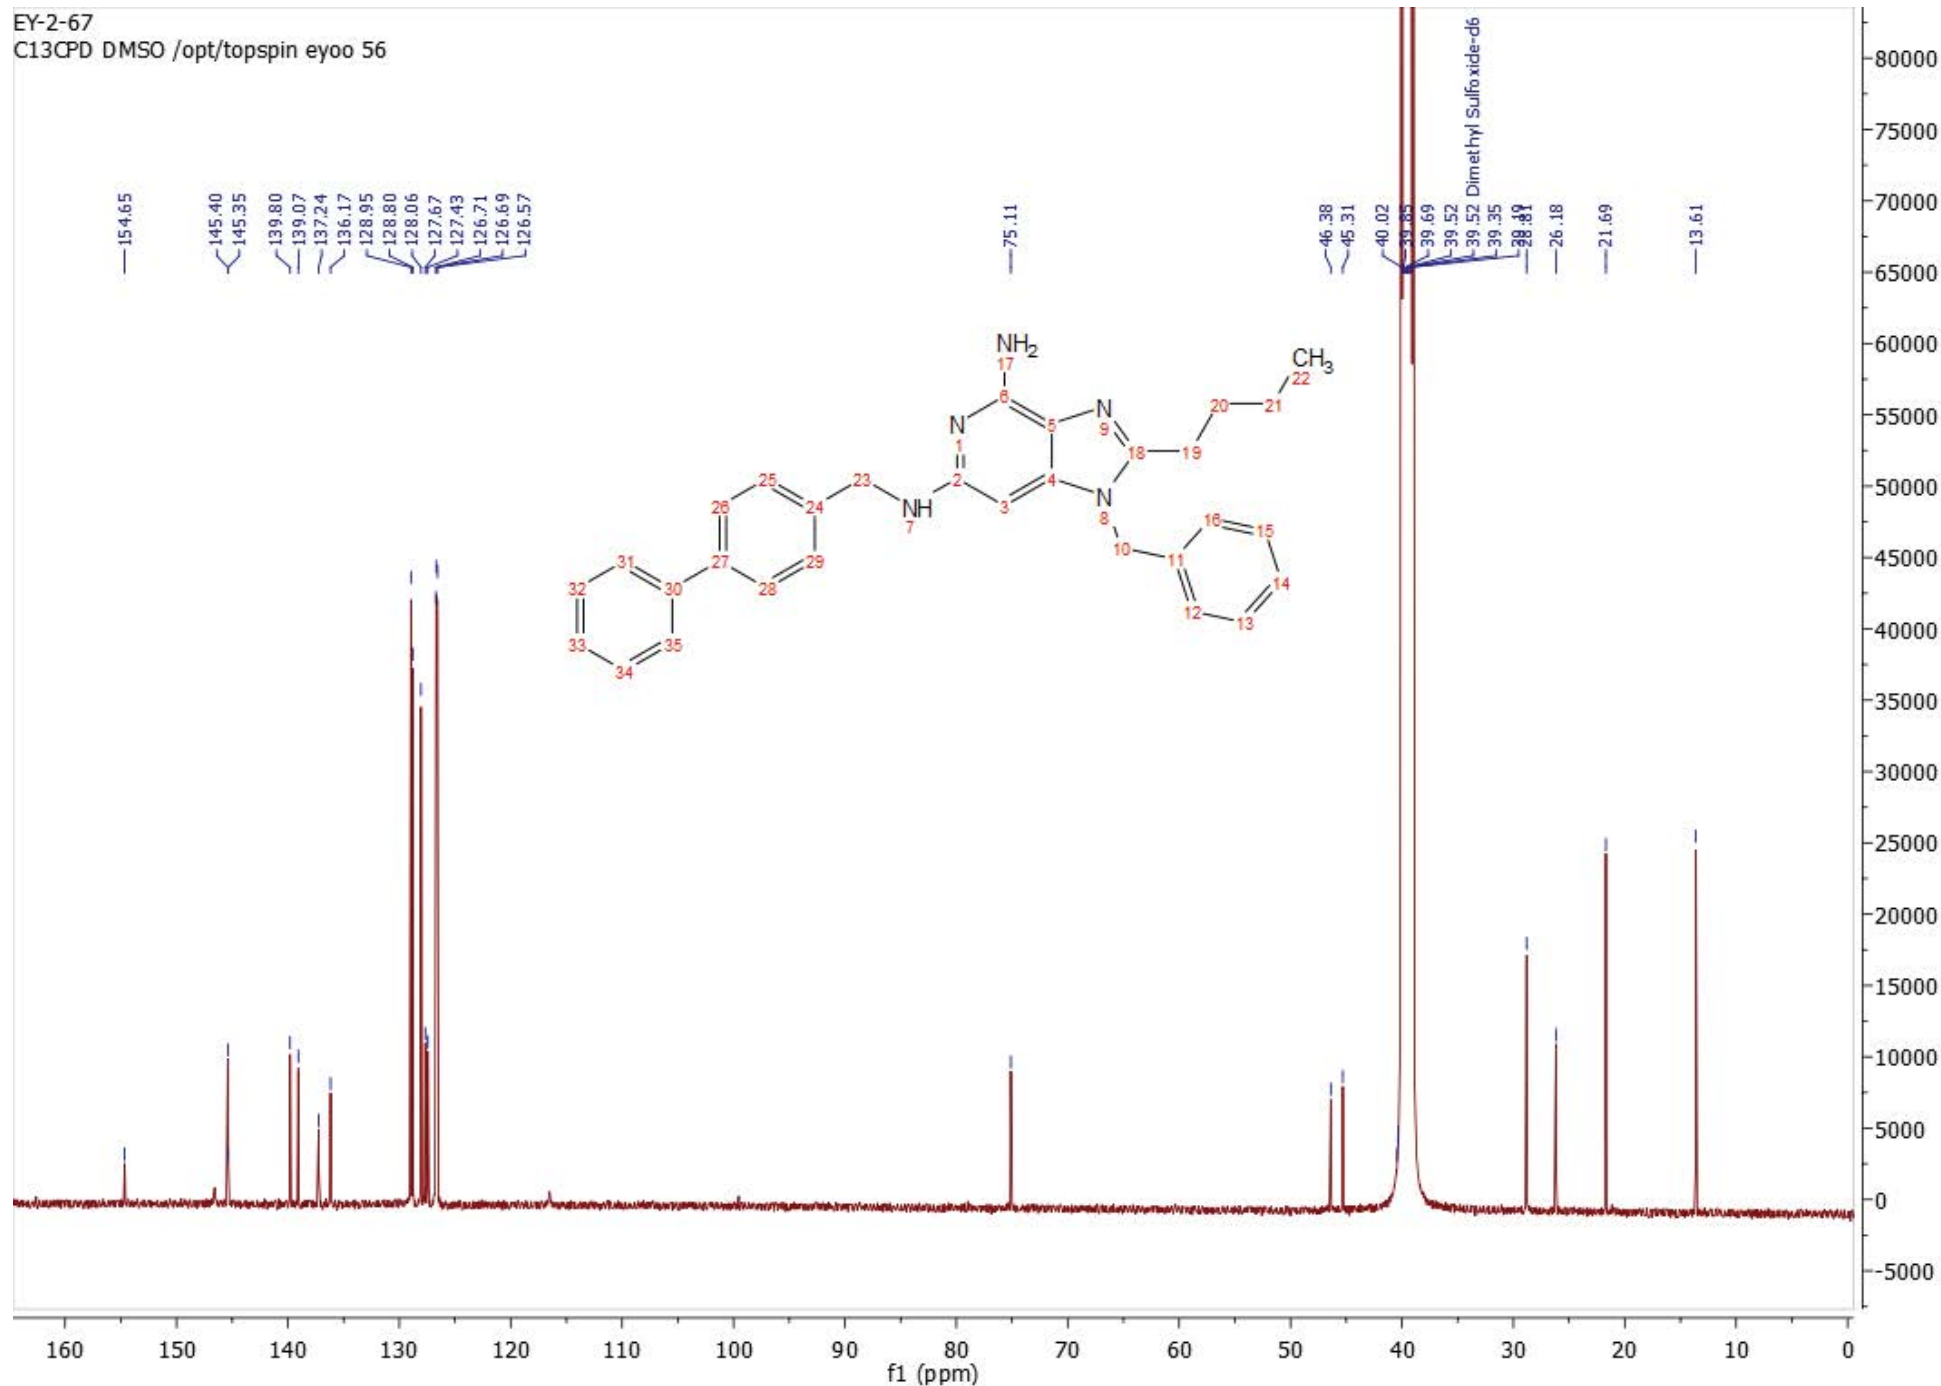

190 MS

|               |                      |             |                      |                 |              |                        |                      |
|---------------|----------------------|-------------|----------------------|-----------------|--------------|------------------------|----------------------|
| Sample Name   | 05.30.12 EY-2-67 tub | Position    | Vial 1               | Instrument Name | Instrument 1 | User Name              |                      |
| Inj Vol       | -1                   | InjPosition |                      | SampleType      | Sample       | IRM Calibration Status | Success              |
| Data Filename | 05.30.12 EY-2-67 tub | ACQ Method  | Water-ACN Infusion M | Comment         |              | Acquired Time          | 5/30/2012 5:11:56 PM |

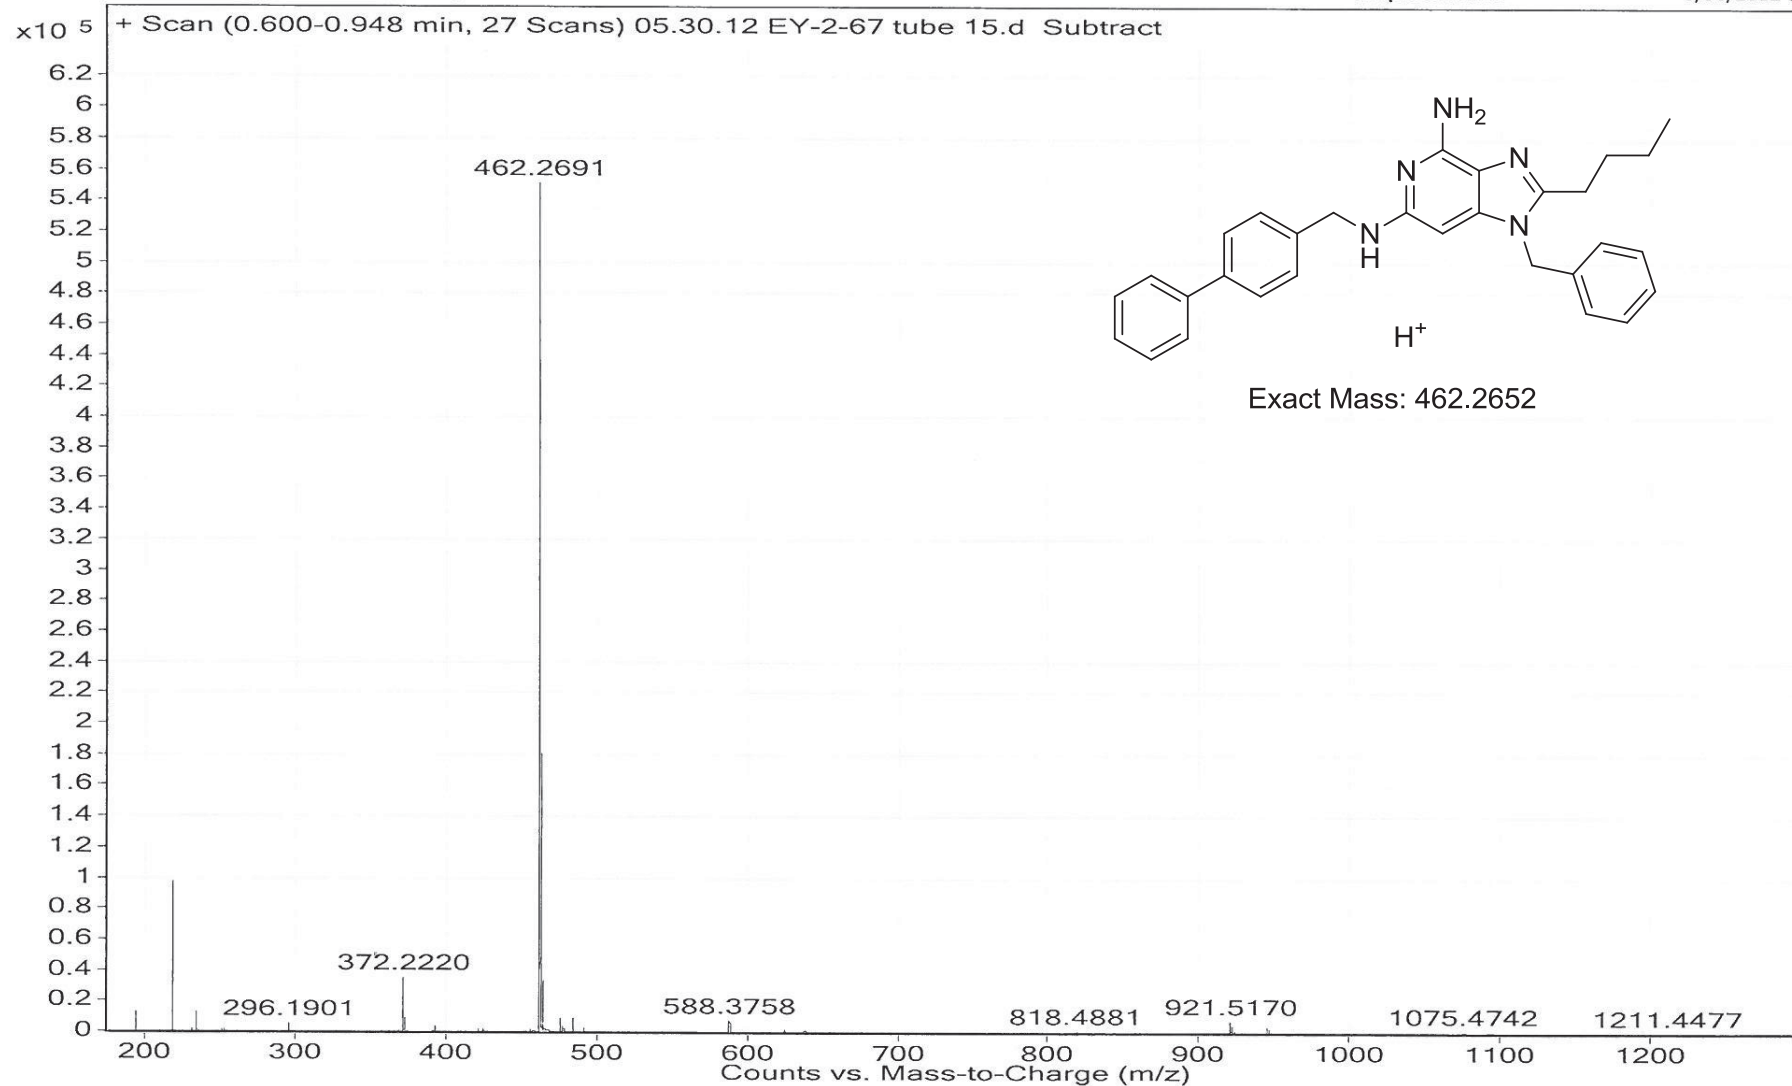

# 190 LC-MS

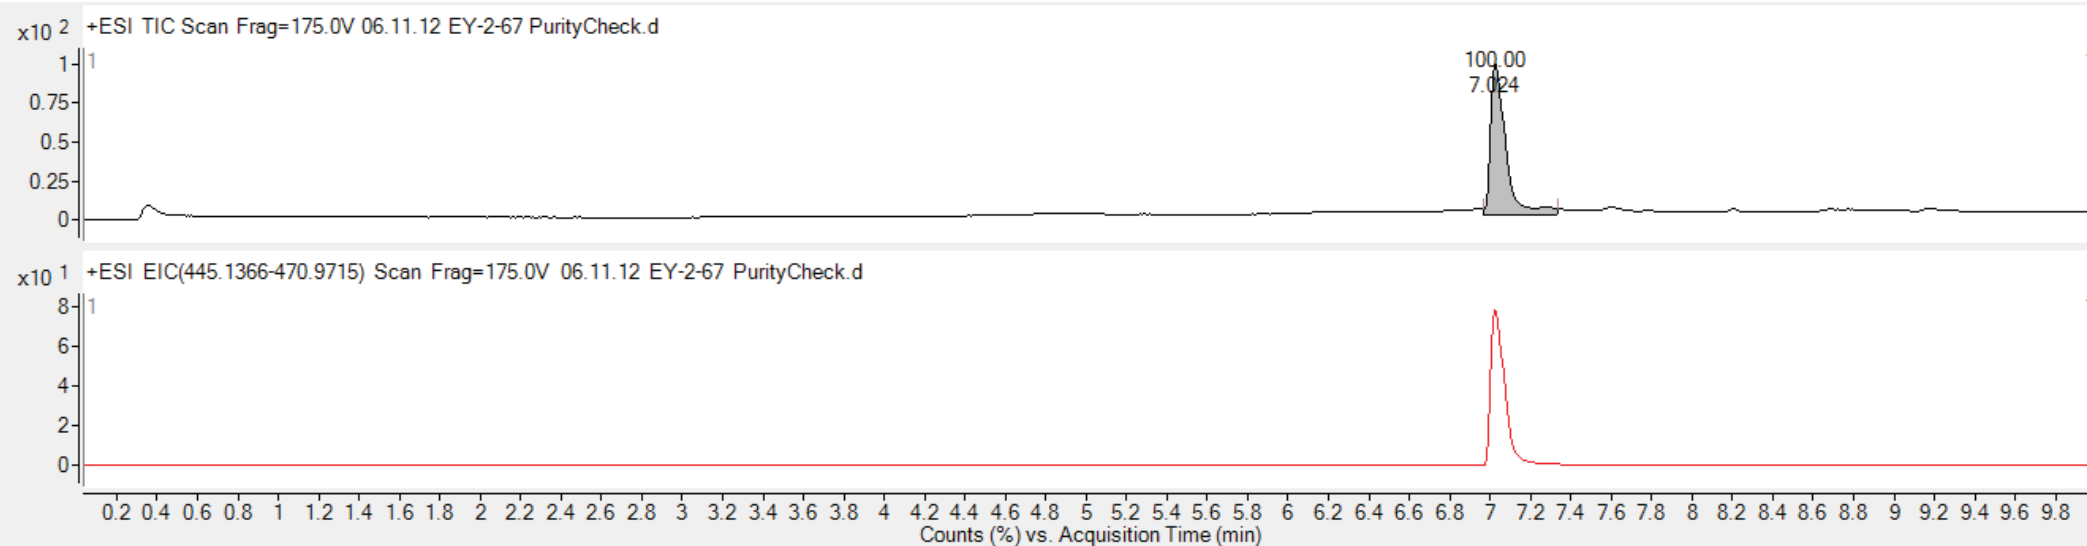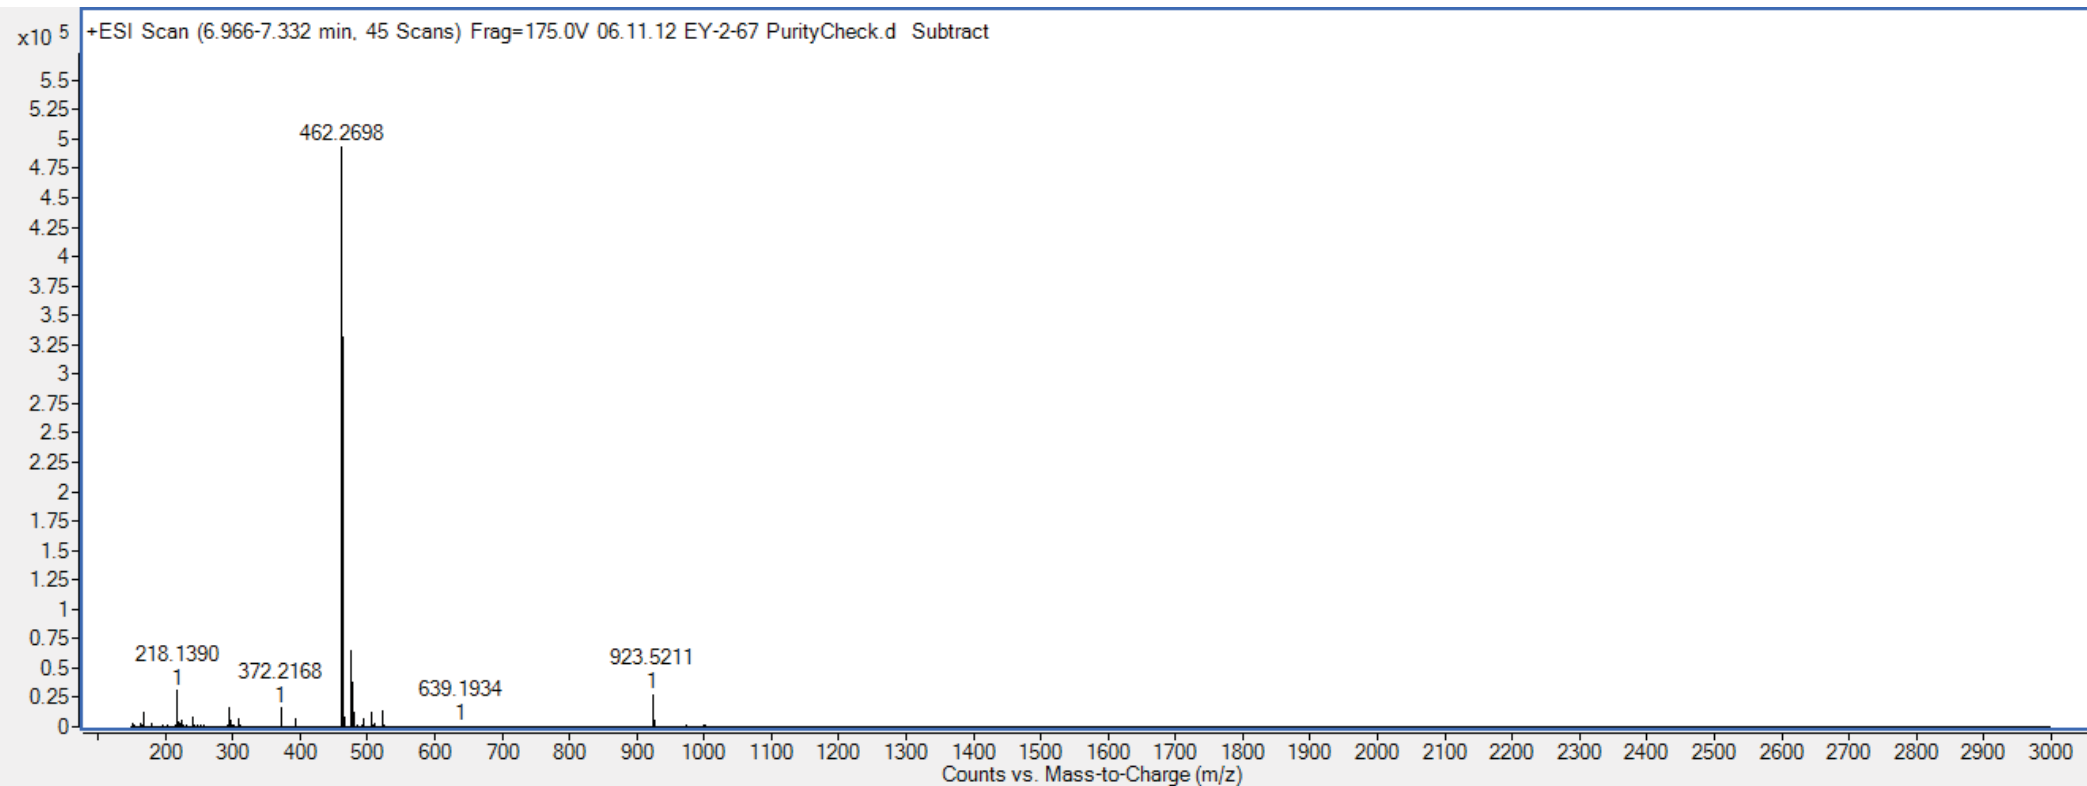

# 18p MS

|               |                      |             |                      |                 |              |                        |                      |
|---------------|----------------------|-------------|----------------------|-----------------|--------------|------------------------|----------------------|
| Sample Name   | 05.16.12 EY-2-39 tub | Position    | Vial 1               | Instrument Name | Instrument 1 | User Name              |                      |
| Inj Vol       | -1                   | InjPosition |                      | SampleType      | Sample       | IRM Calibration Status | Success              |
| Data Filename | 05.16.12 EY-2-39 tub | ACQ Method  | Water-ACN Infusion M | Comment         |              | Acquired Time          | 5/16/2012 6:25:51 PM |

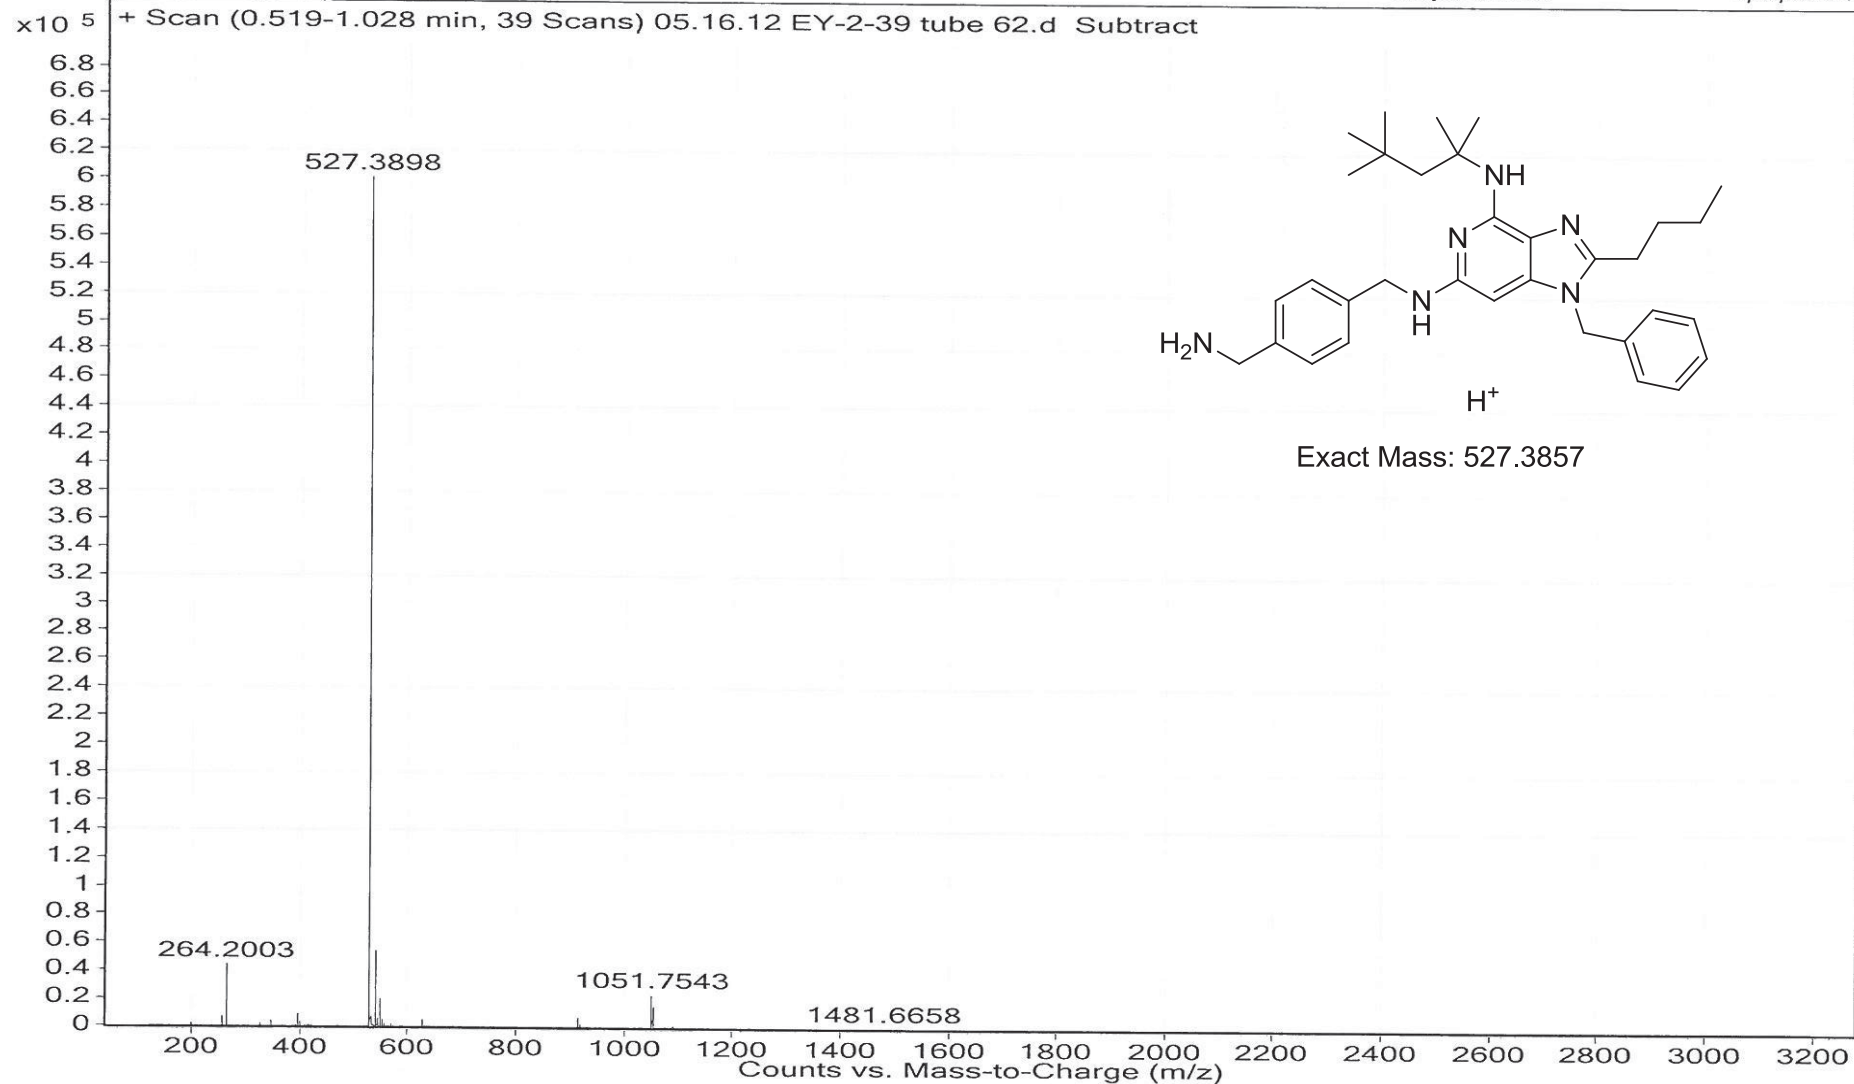

# 19p <sup>1</sup>H NMR

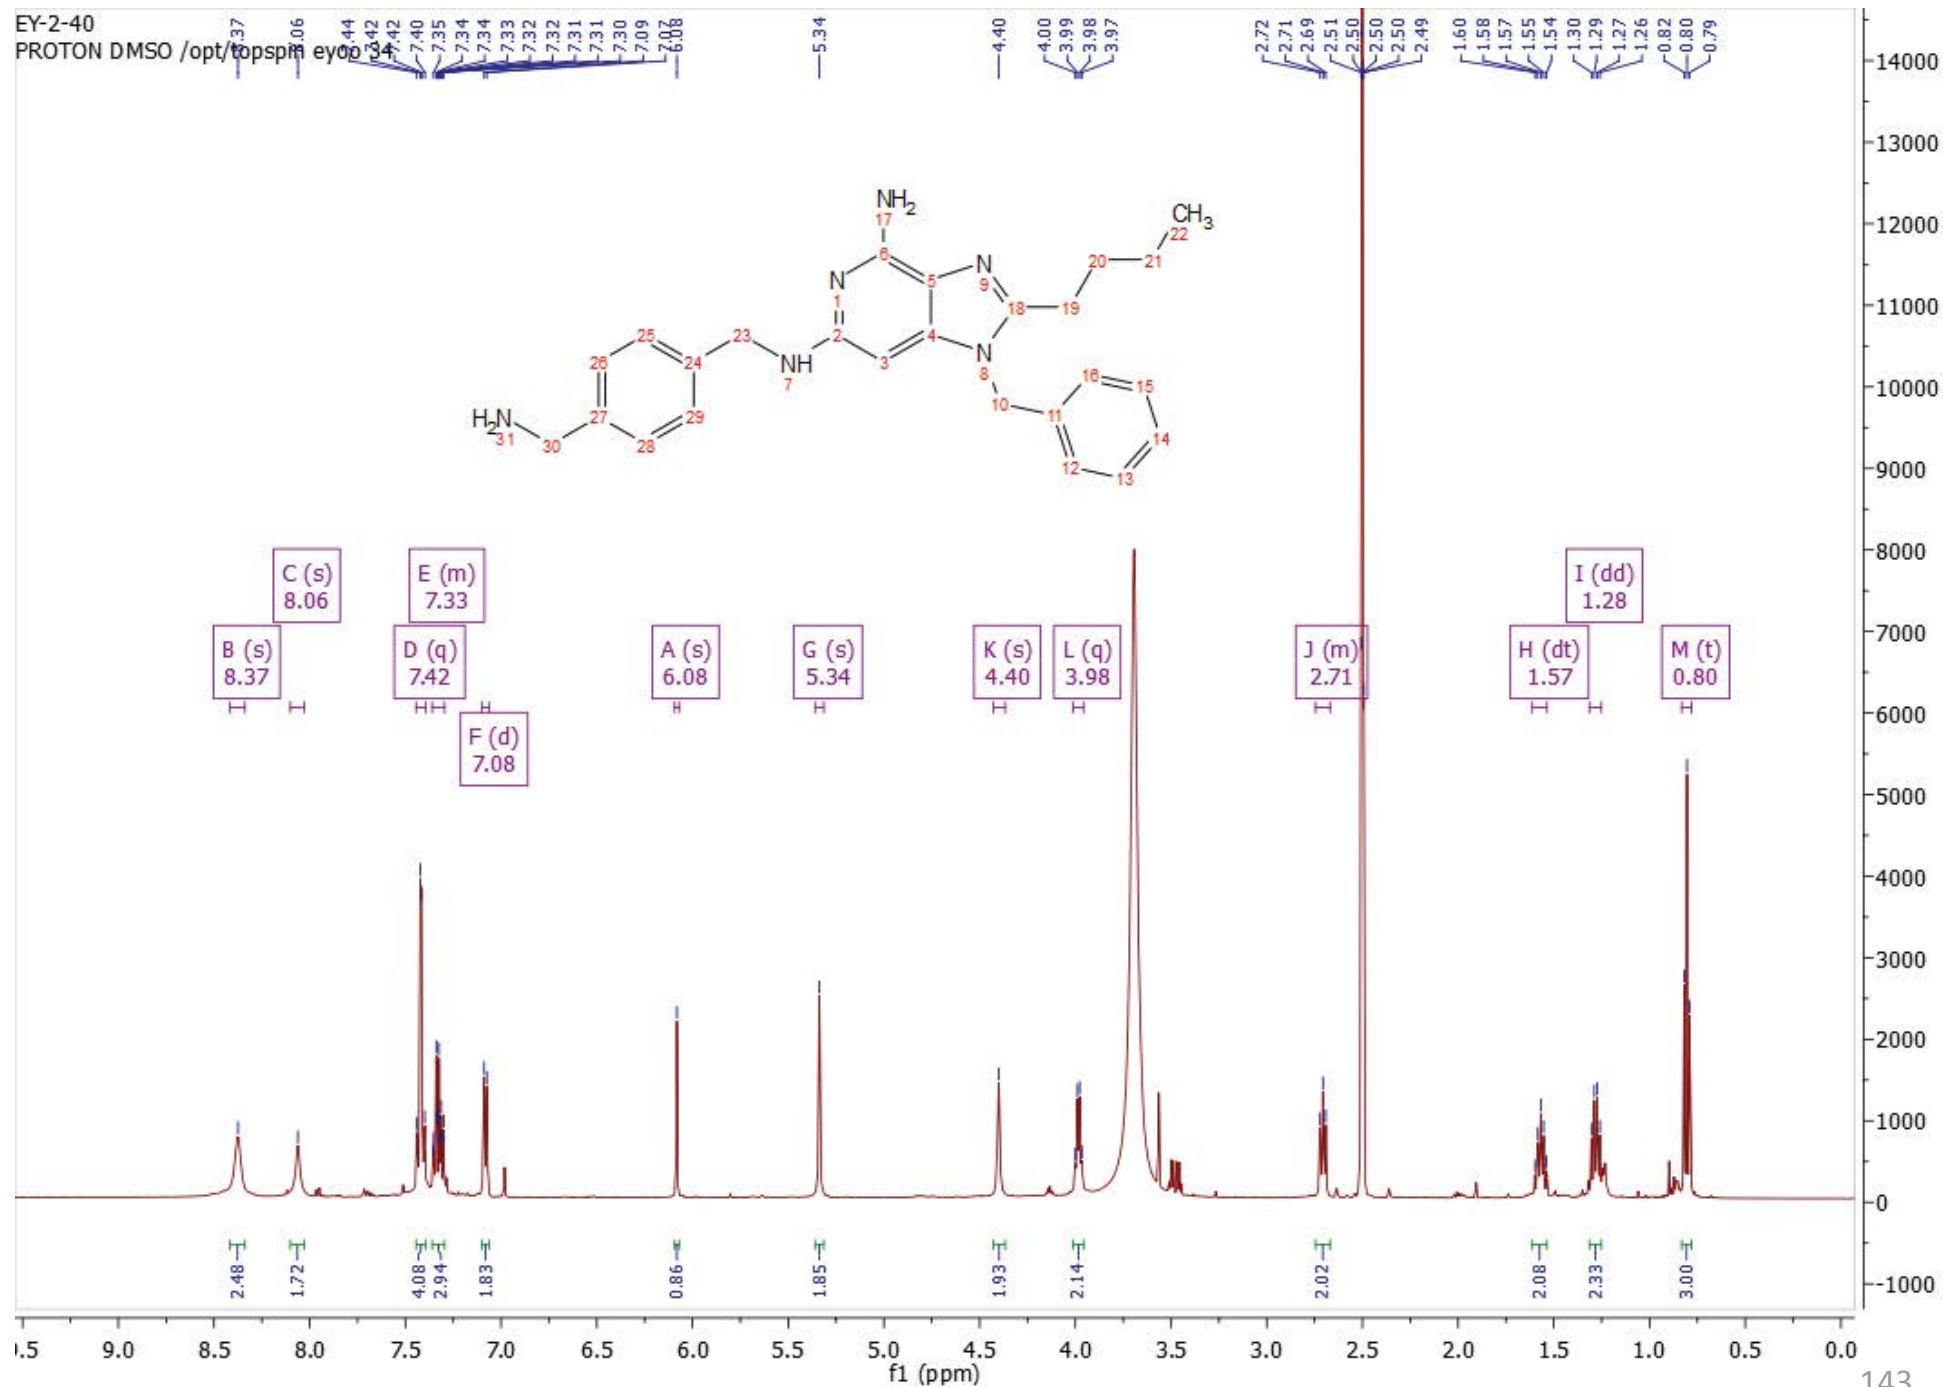

# 19p <sup>13</sup>C NMR

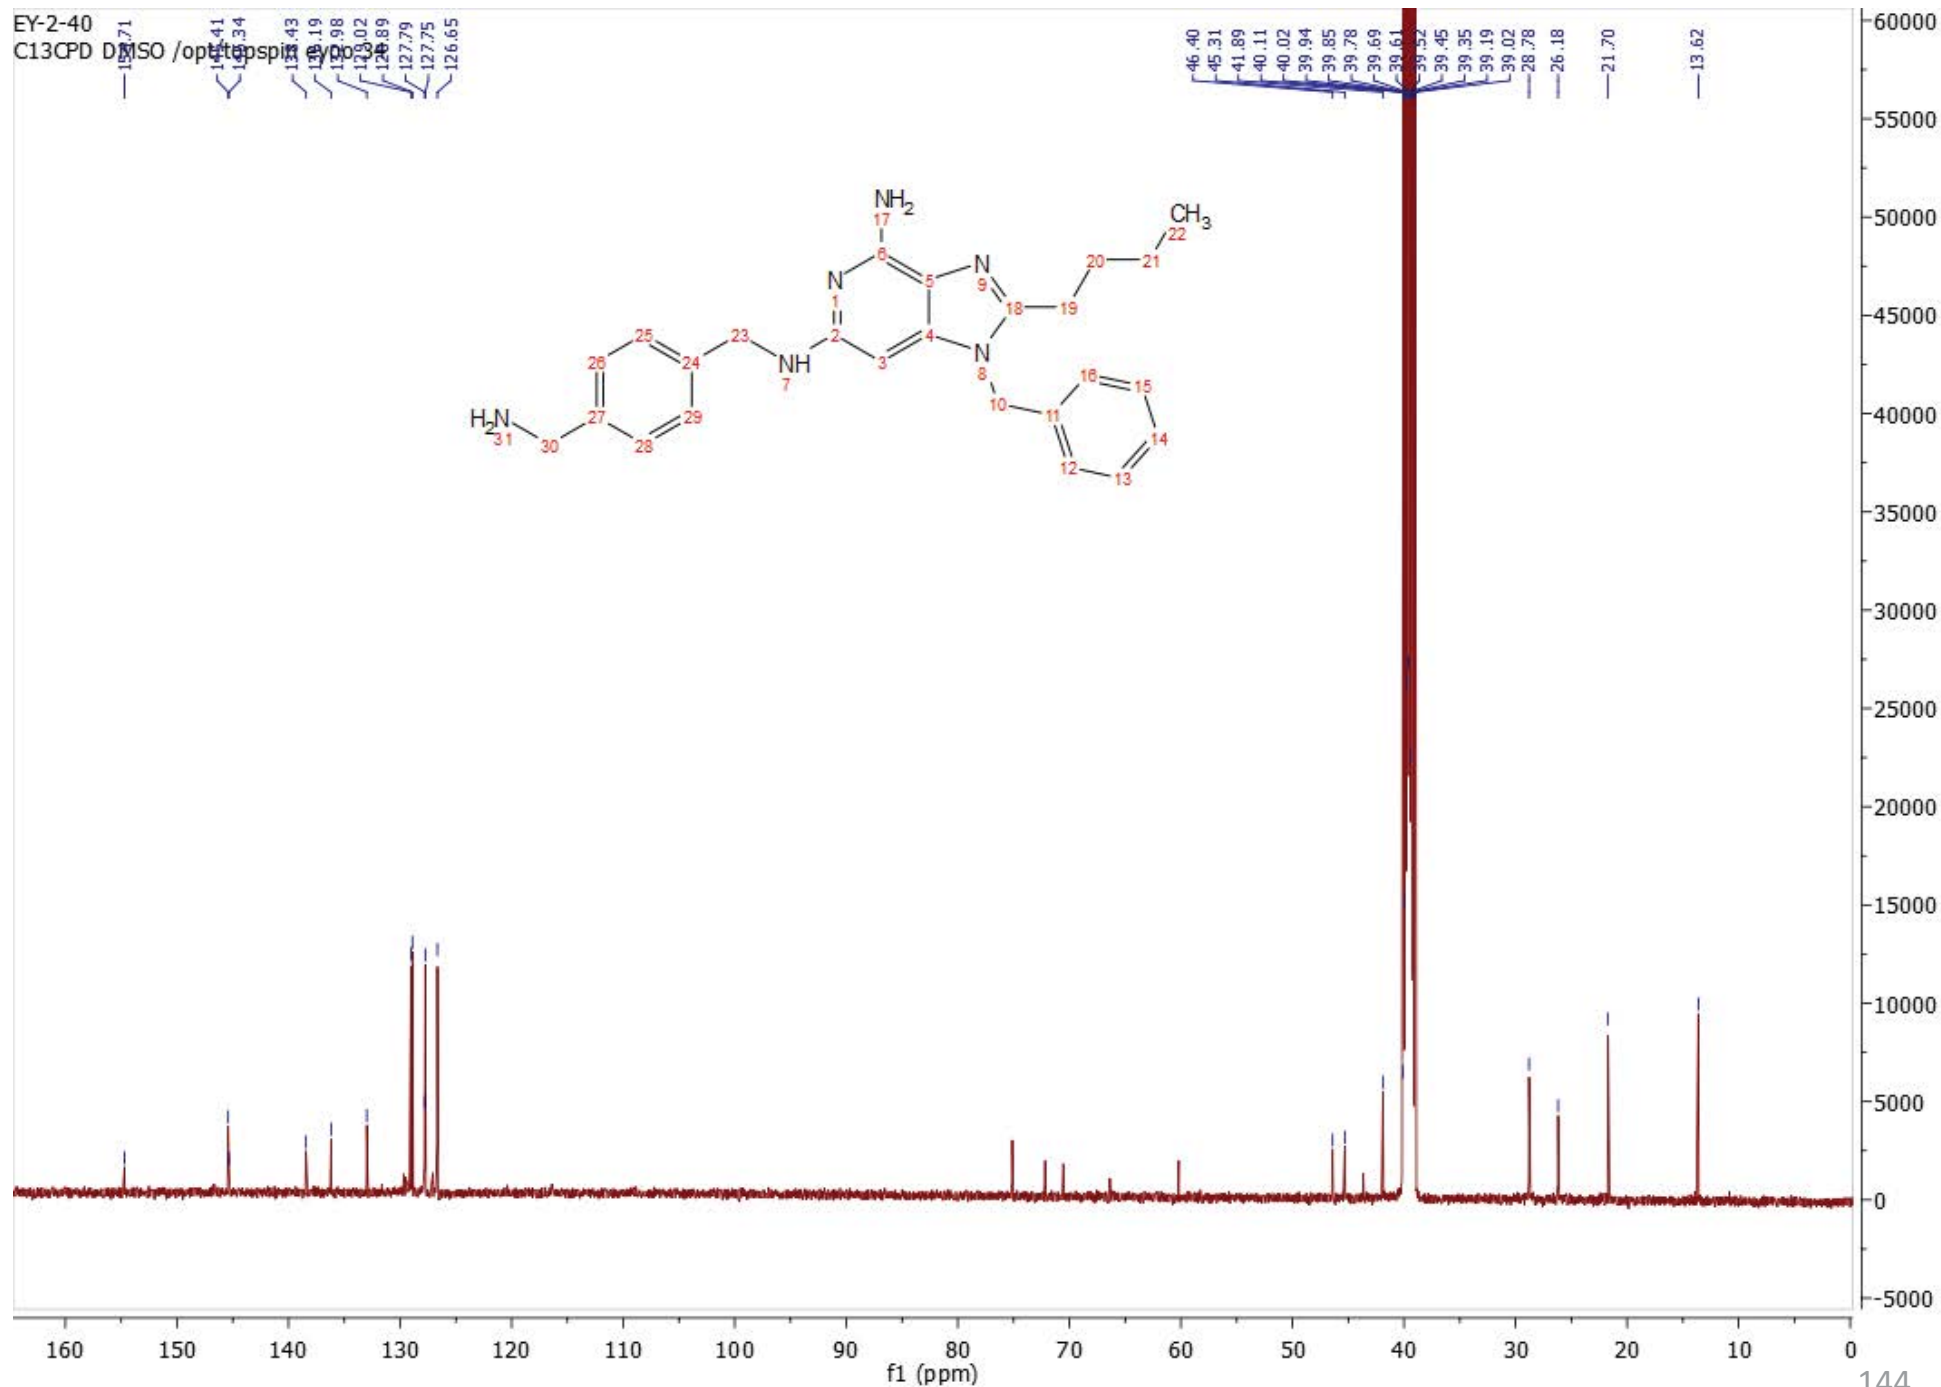

# 19p MS

|               |                    |             |                      |                 |              |                        |                       |
|---------------|--------------------|-------------|----------------------|-----------------|--------------|------------------------|-----------------------|
| Sample Name   | 05.17.12 EY-2-40   | Position    | Vial 1               | Instrument Name | Instrument 1 | User Name              |                       |
| Inj Vol       | -1                 | InjPosition |                      | SampleType      | Sample       | IRM Calibration Status | Success               |
| Data Filename | 05.17.12 EY-2-40.d | ACQ Method  | Water-ACN Infusion M | Comment         |              | Acquired Time          | 5/17/2012 11:06:05 AM |

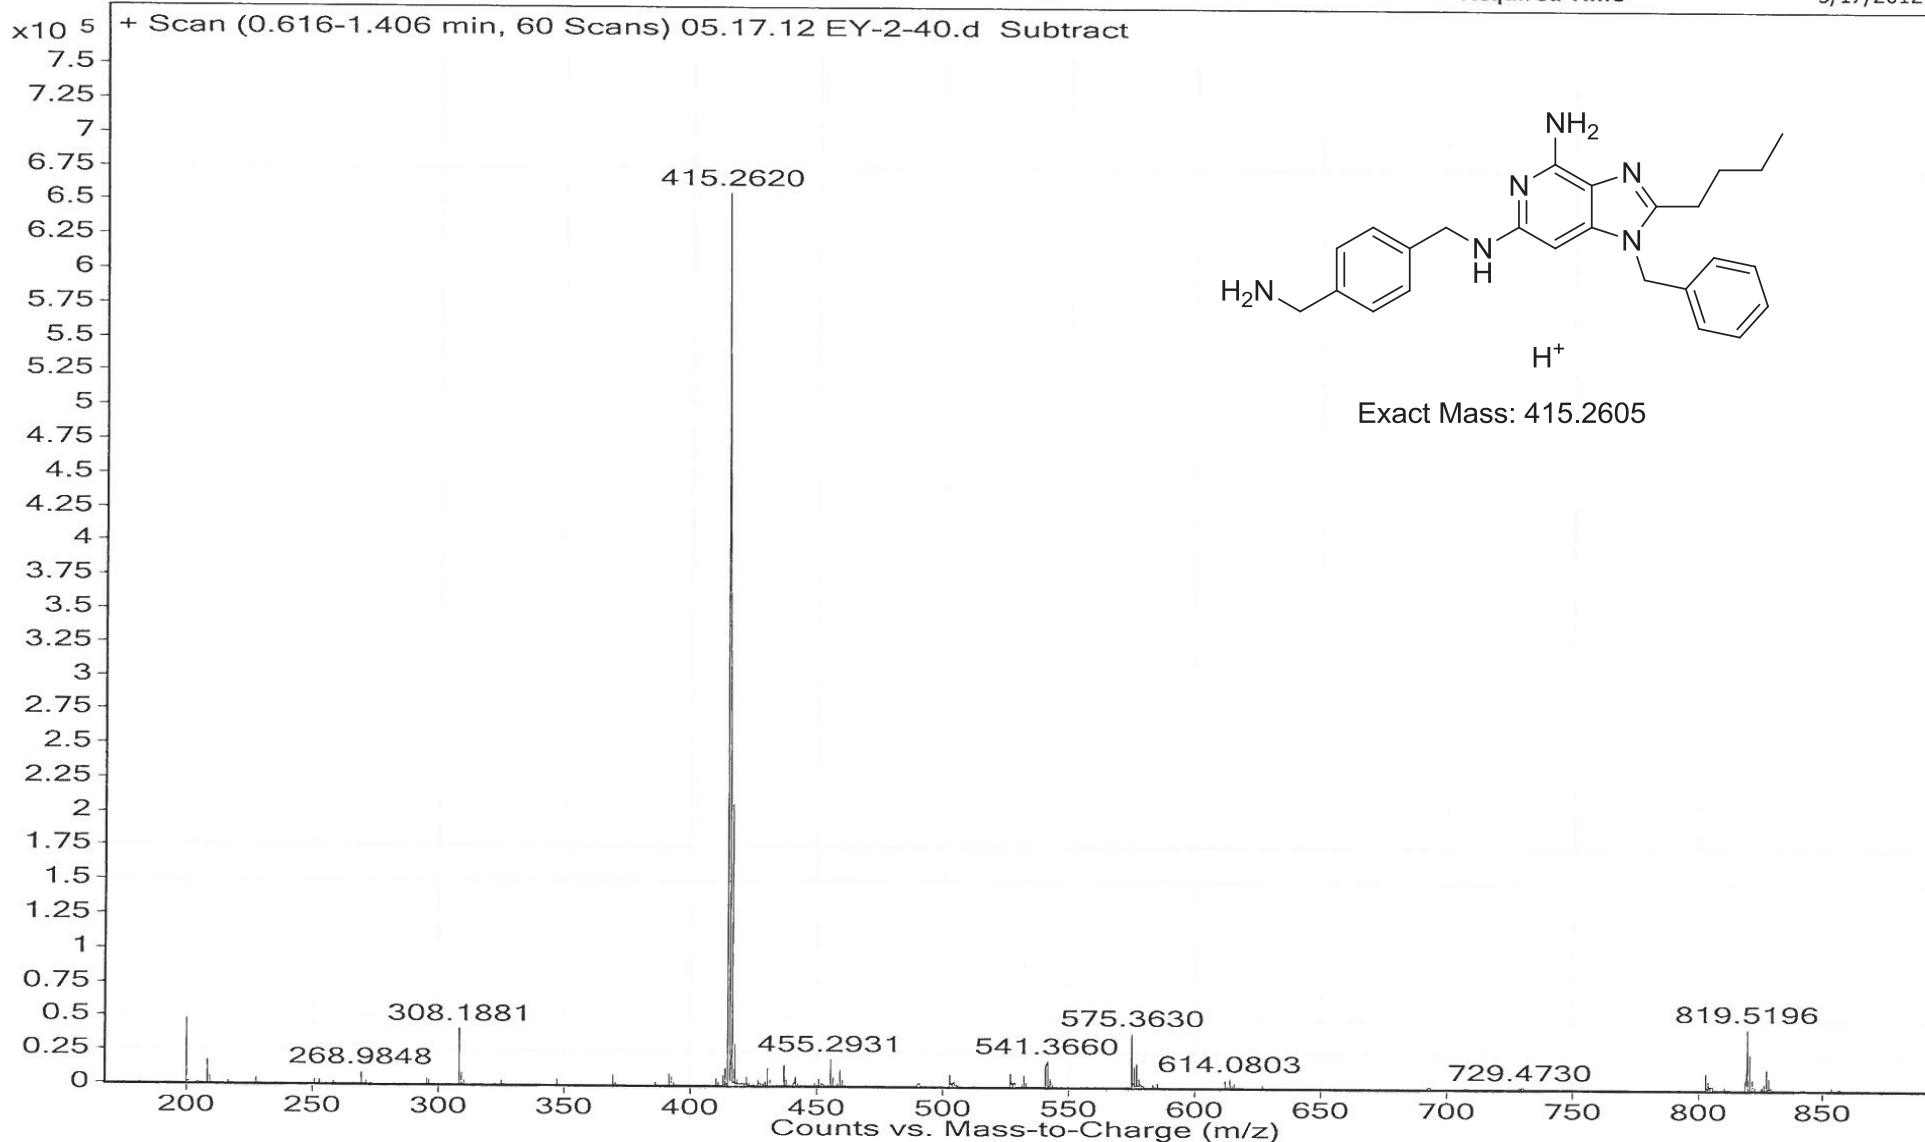



# 19p LC-MS

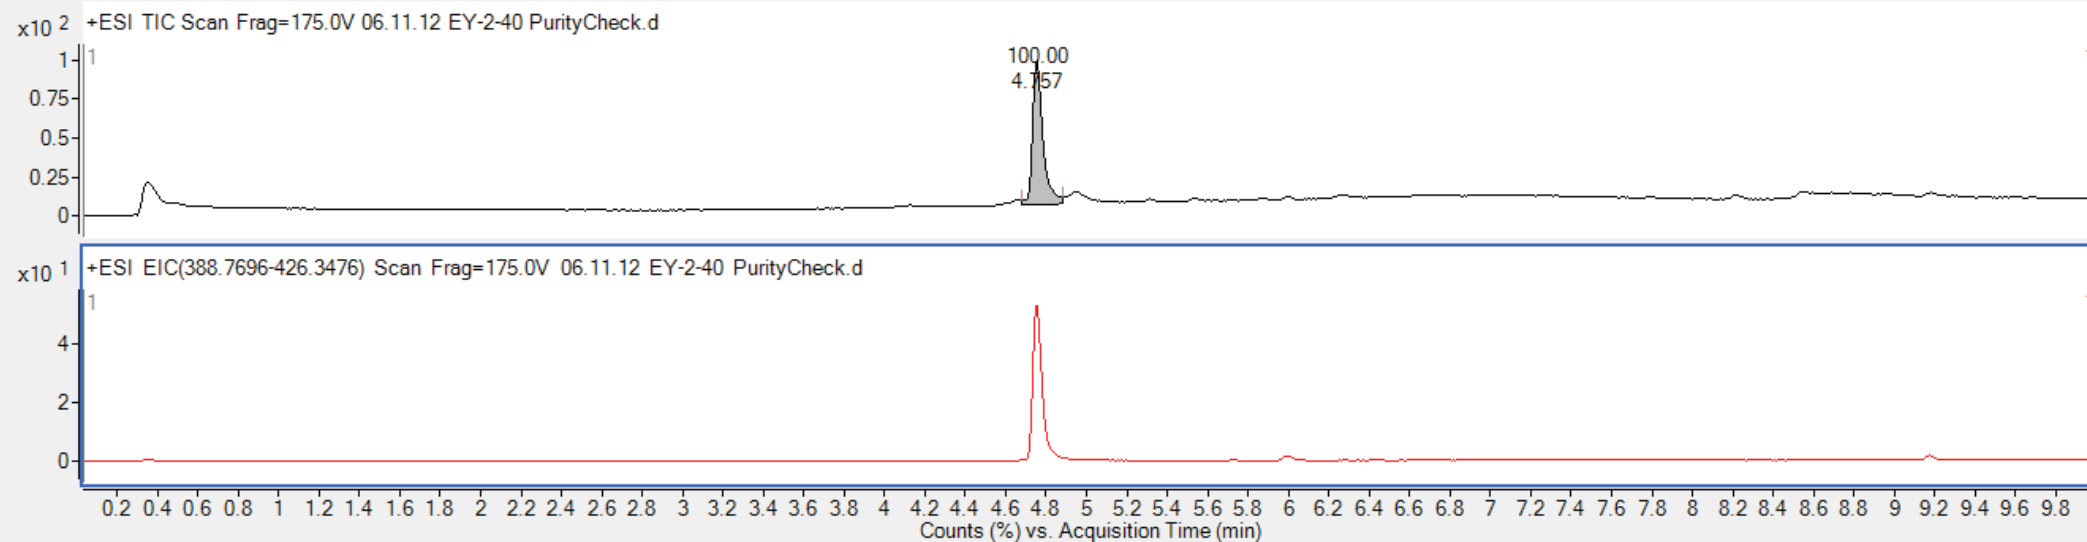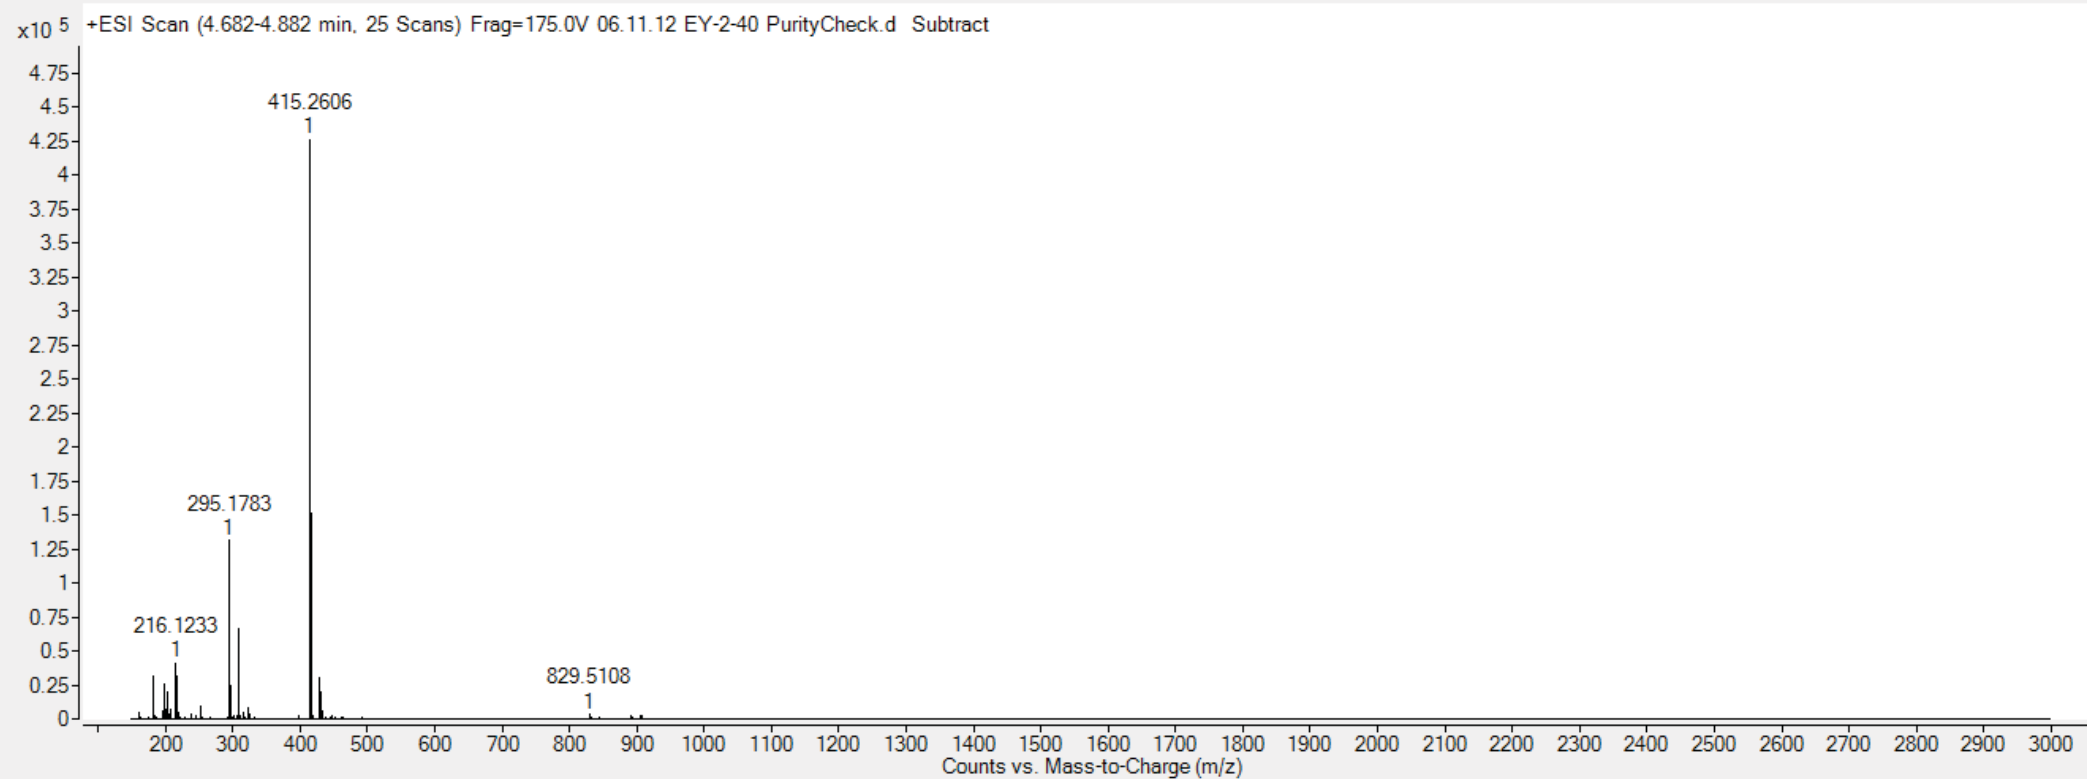

# 19q <sup>1</sup>H NMR

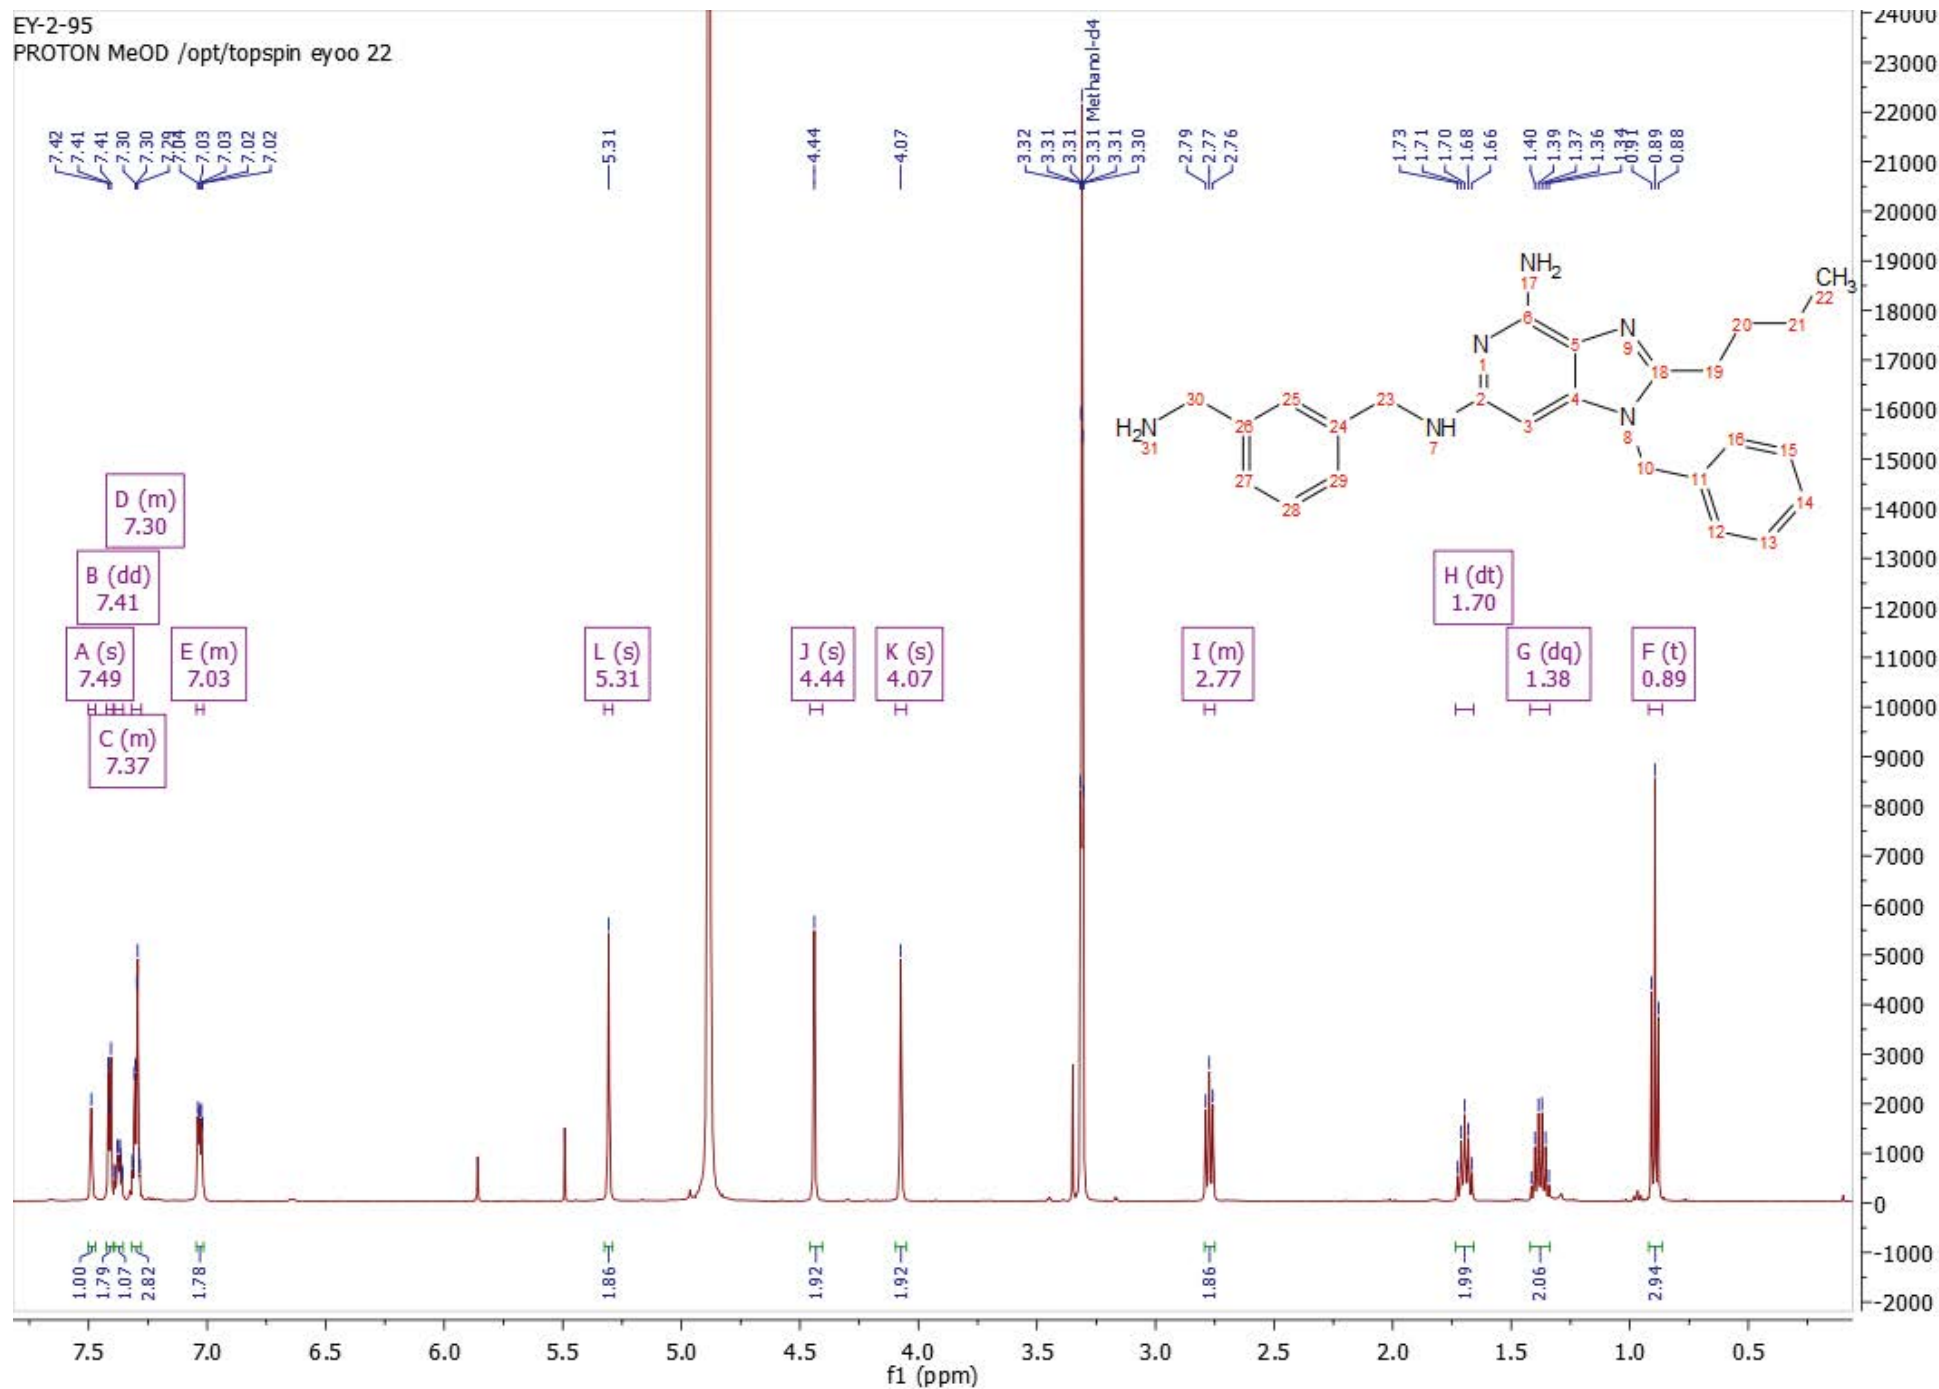

# 19q <sup>13</sup>C NMR

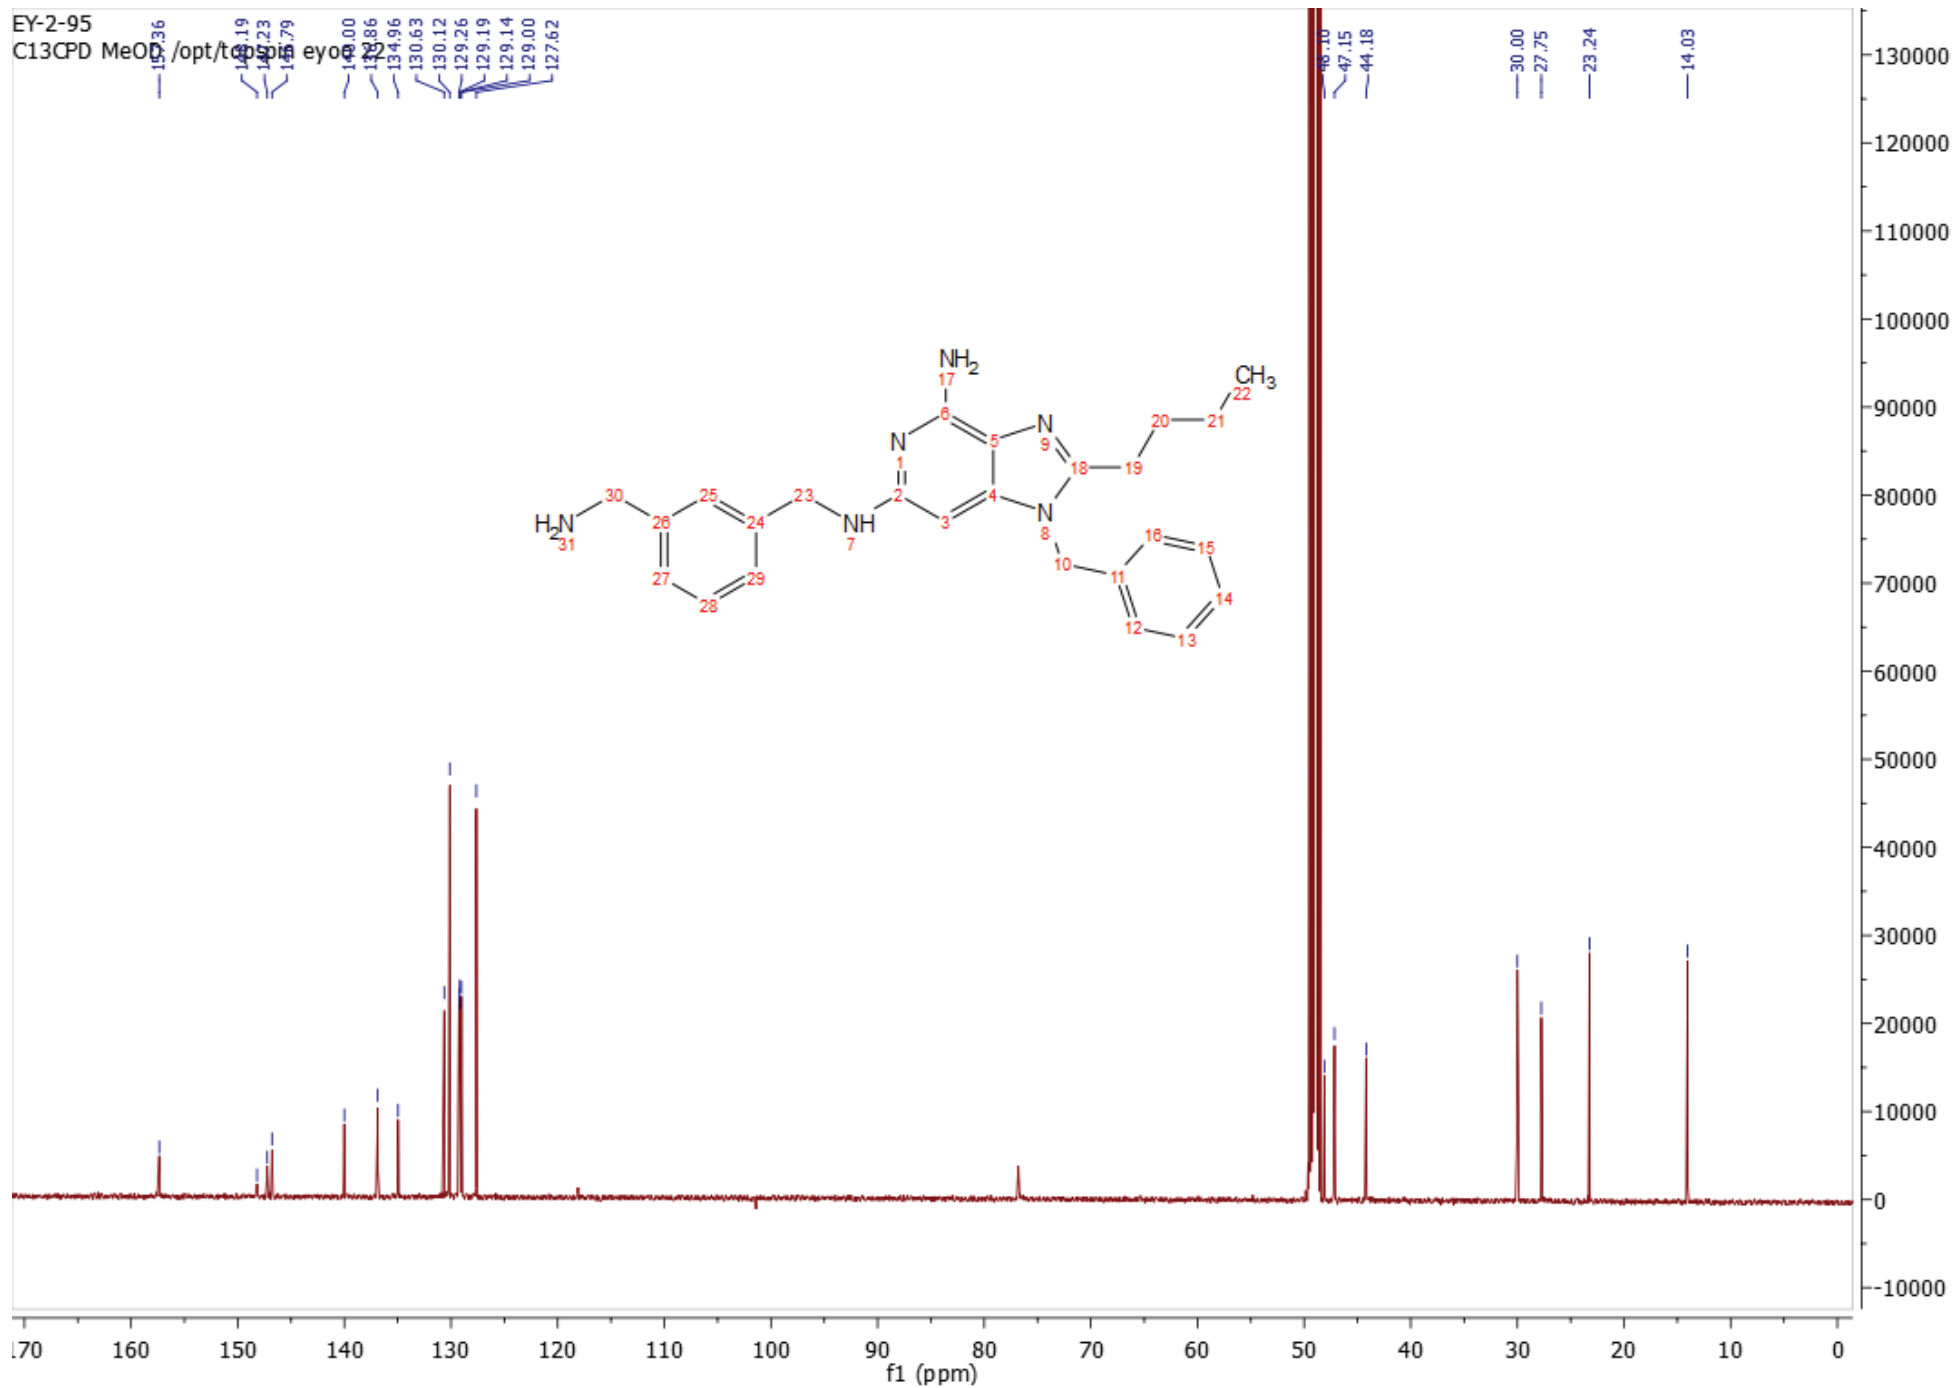

# 19q MS

|               |                      |             |                      |                 |              |                        |                       |
|---------------|----------------------|-------------|----------------------|-----------------|--------------|------------------------|-----------------------|
| Sample Name   | 07.18.12 EY-2-95 tub | Position    | Vial 1               | Instrument Name | Instrument 1 | User Name              |                       |
| Inj Vol       | -1                   | InjPosition |                      | SampleType      | Sample       | IRM Calibration Status | Success               |
| Data Filename | 07.18.12 EY-2-95 tub | ACQ Method  | Water-ACN Infusion M | Comment         |              | Acquired Time          | 7/18/2012 11:02:04 AM |

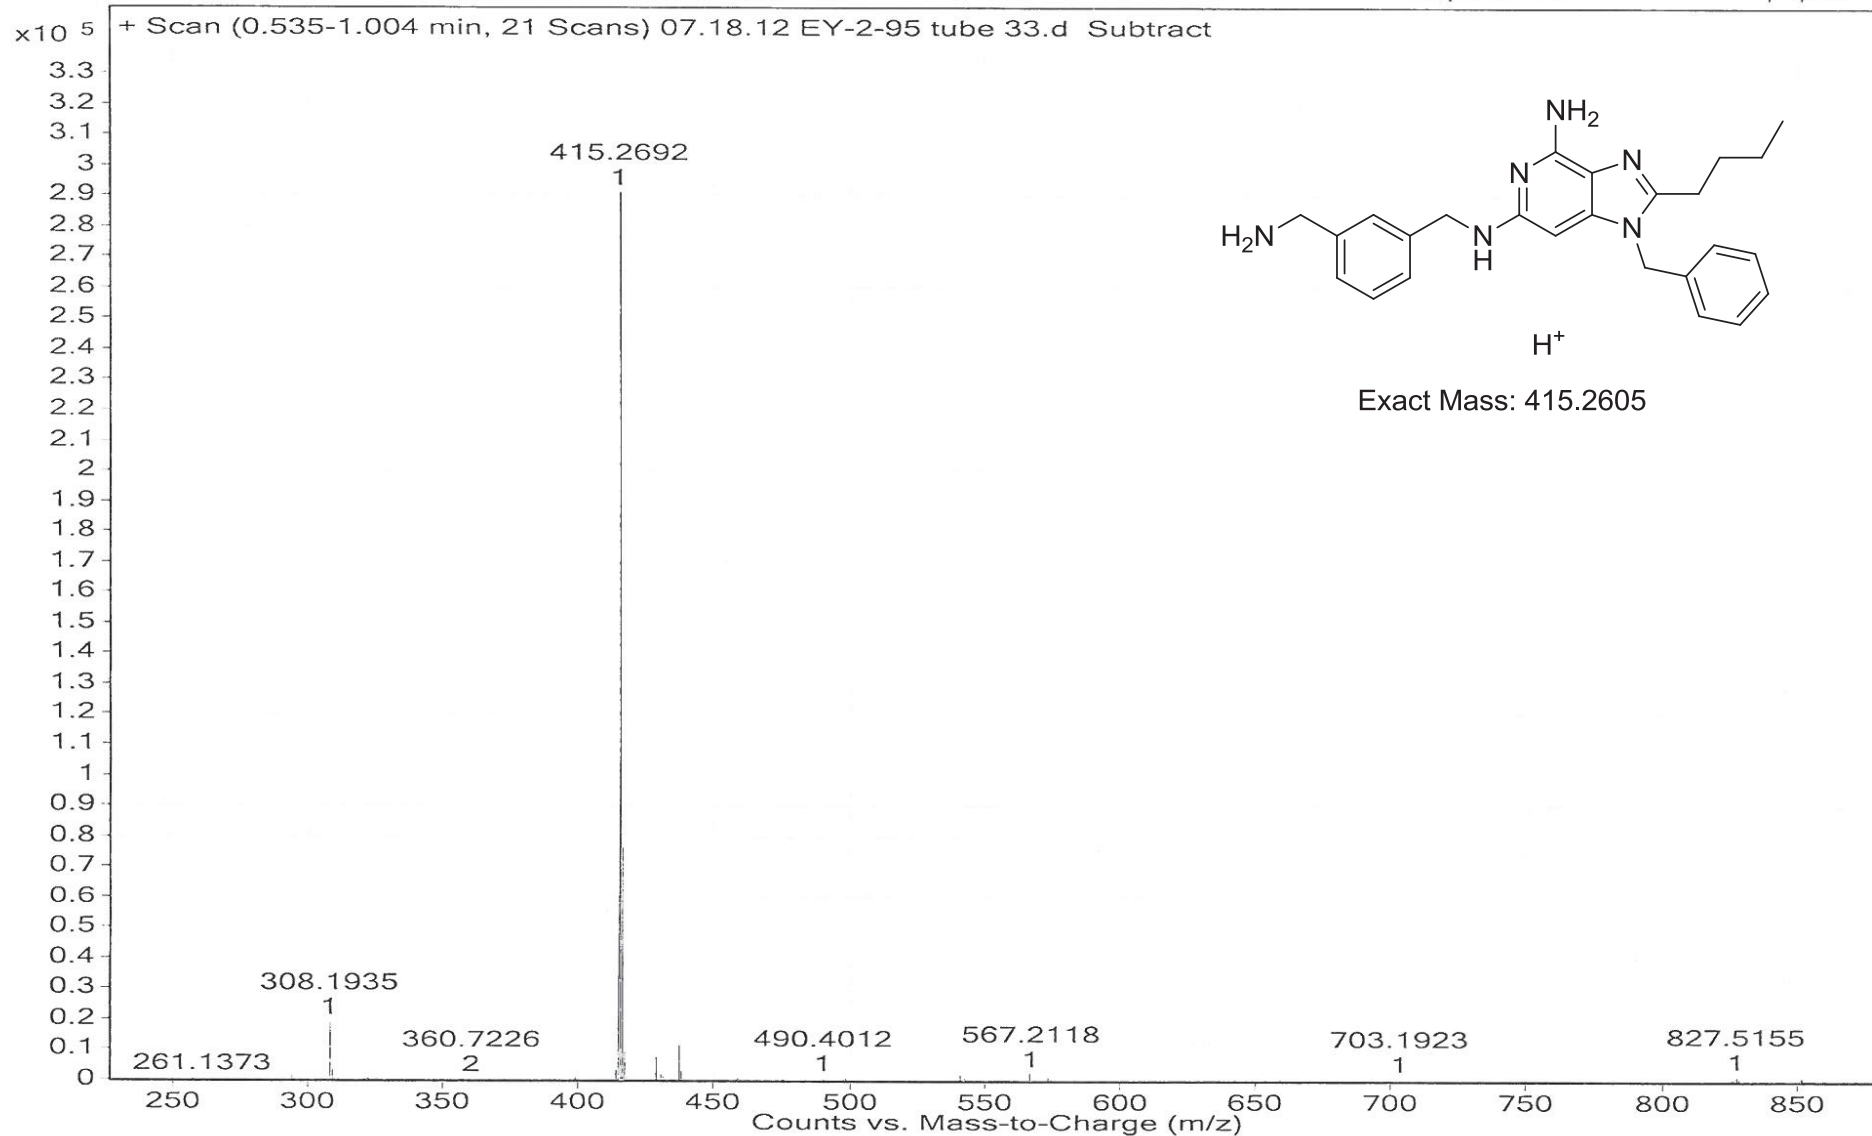

# 19q LC-MS

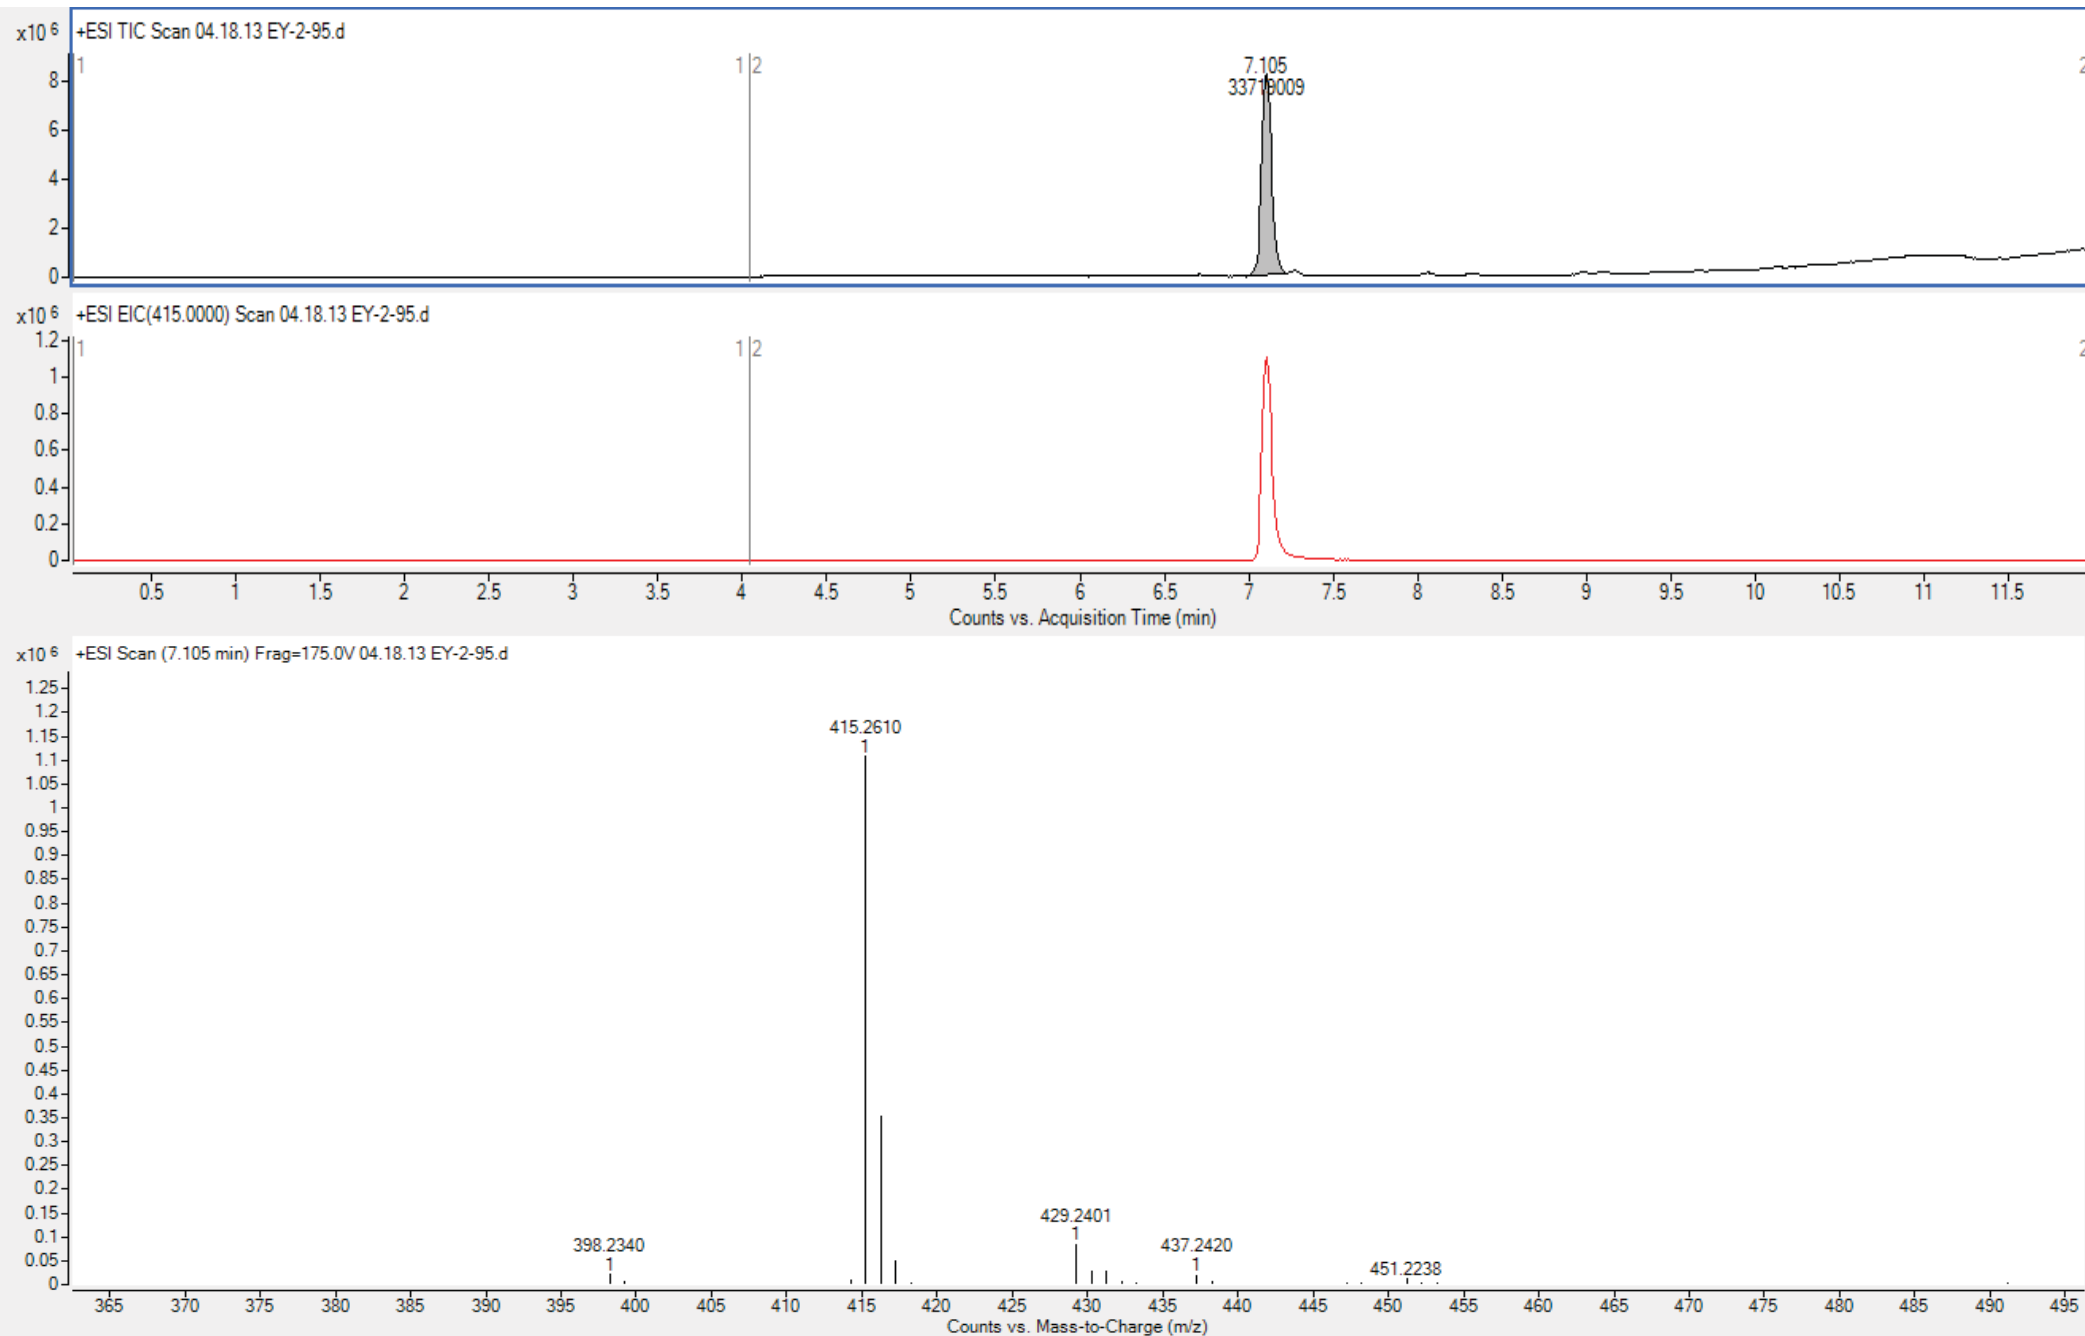

# 19r <sup>1</sup>H NMR

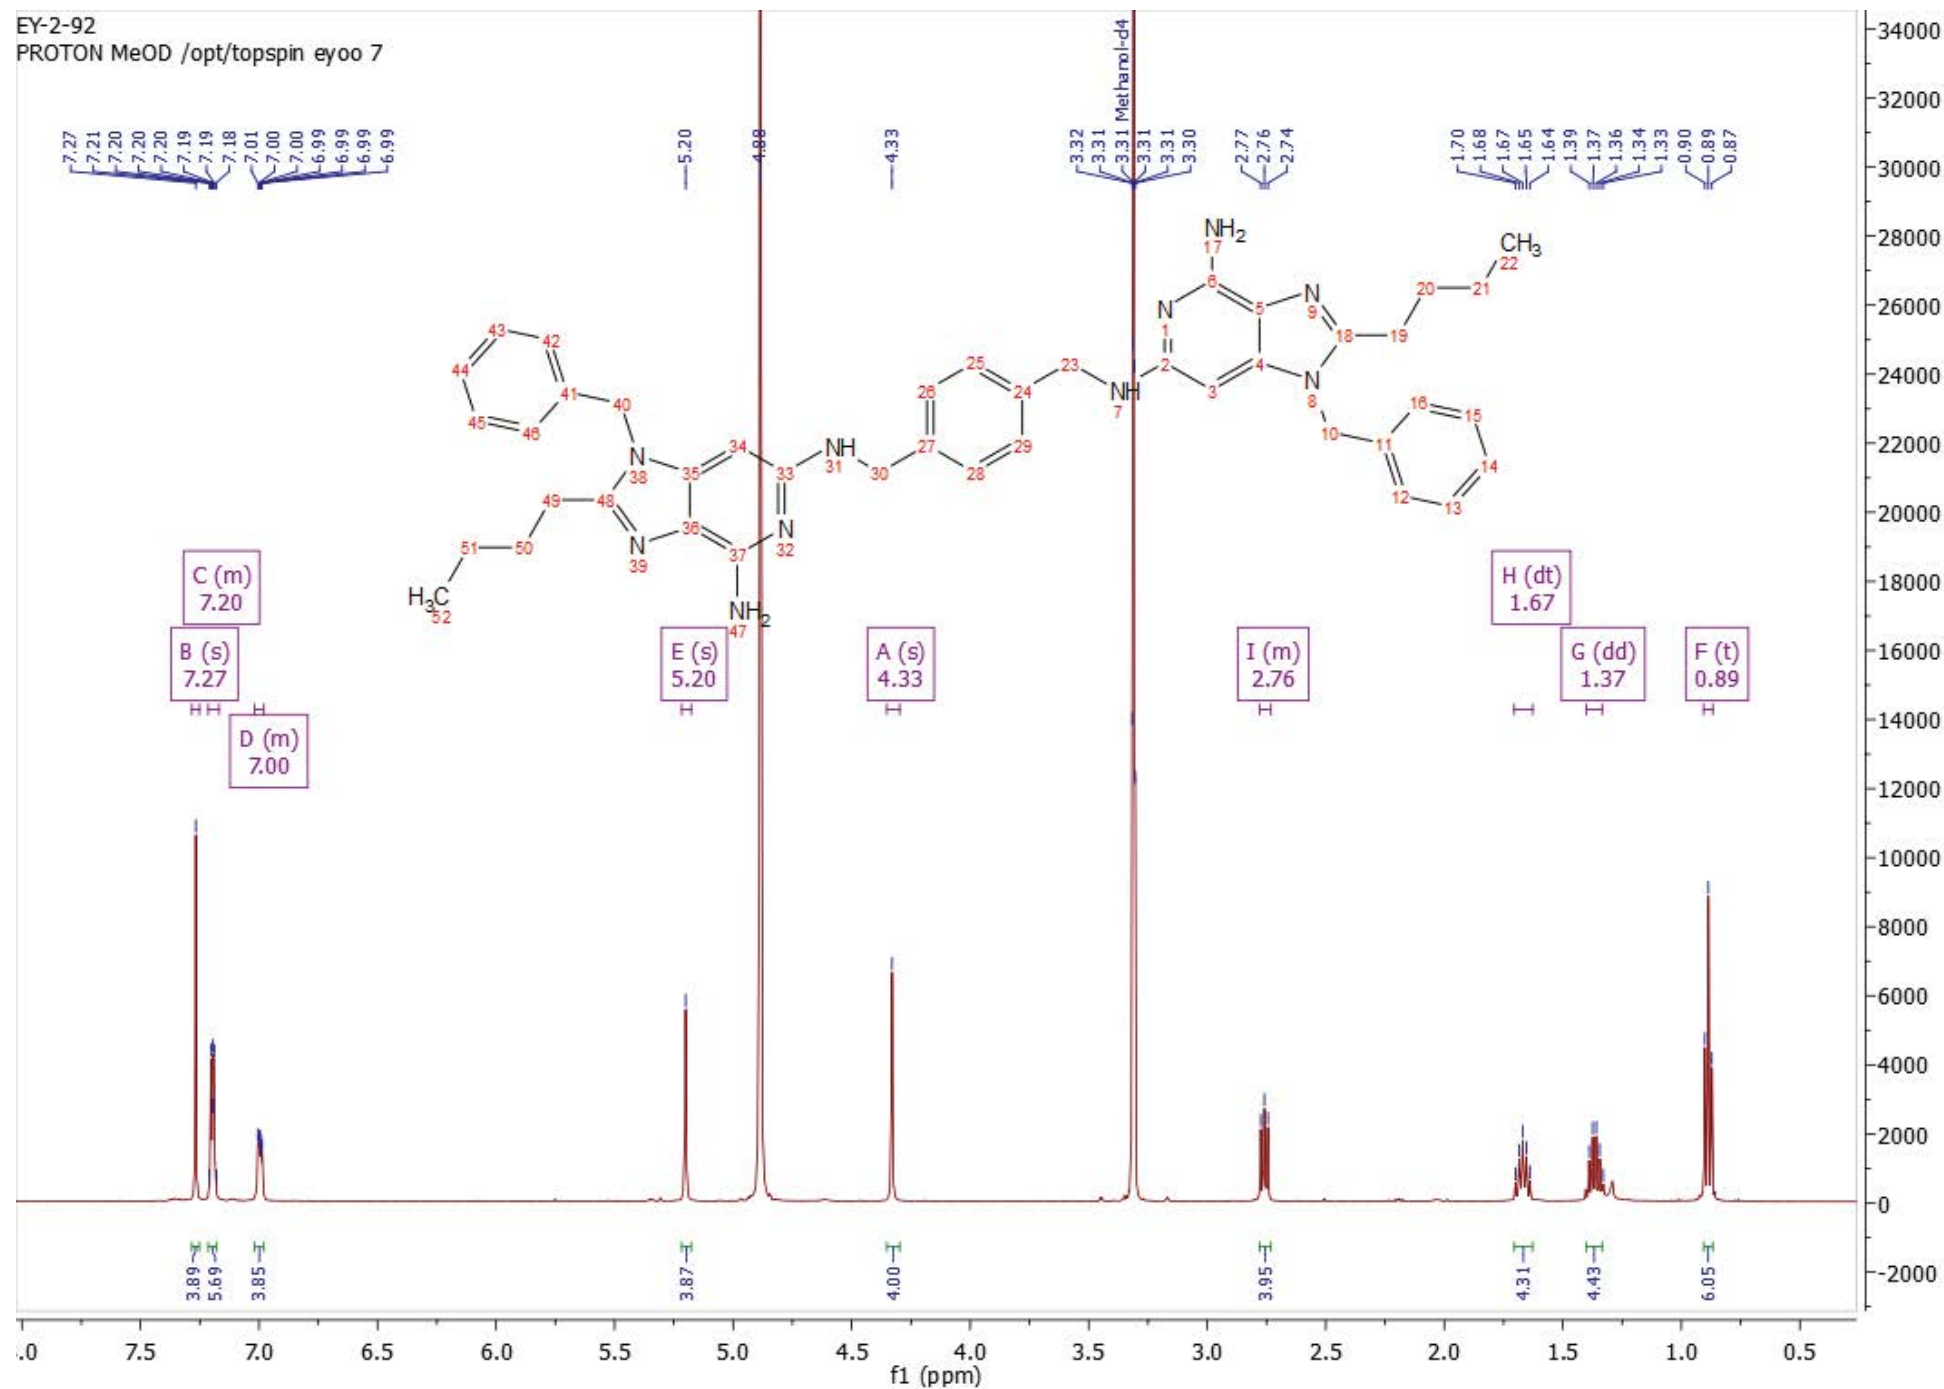

# 19r <sup>13</sup>C NMR

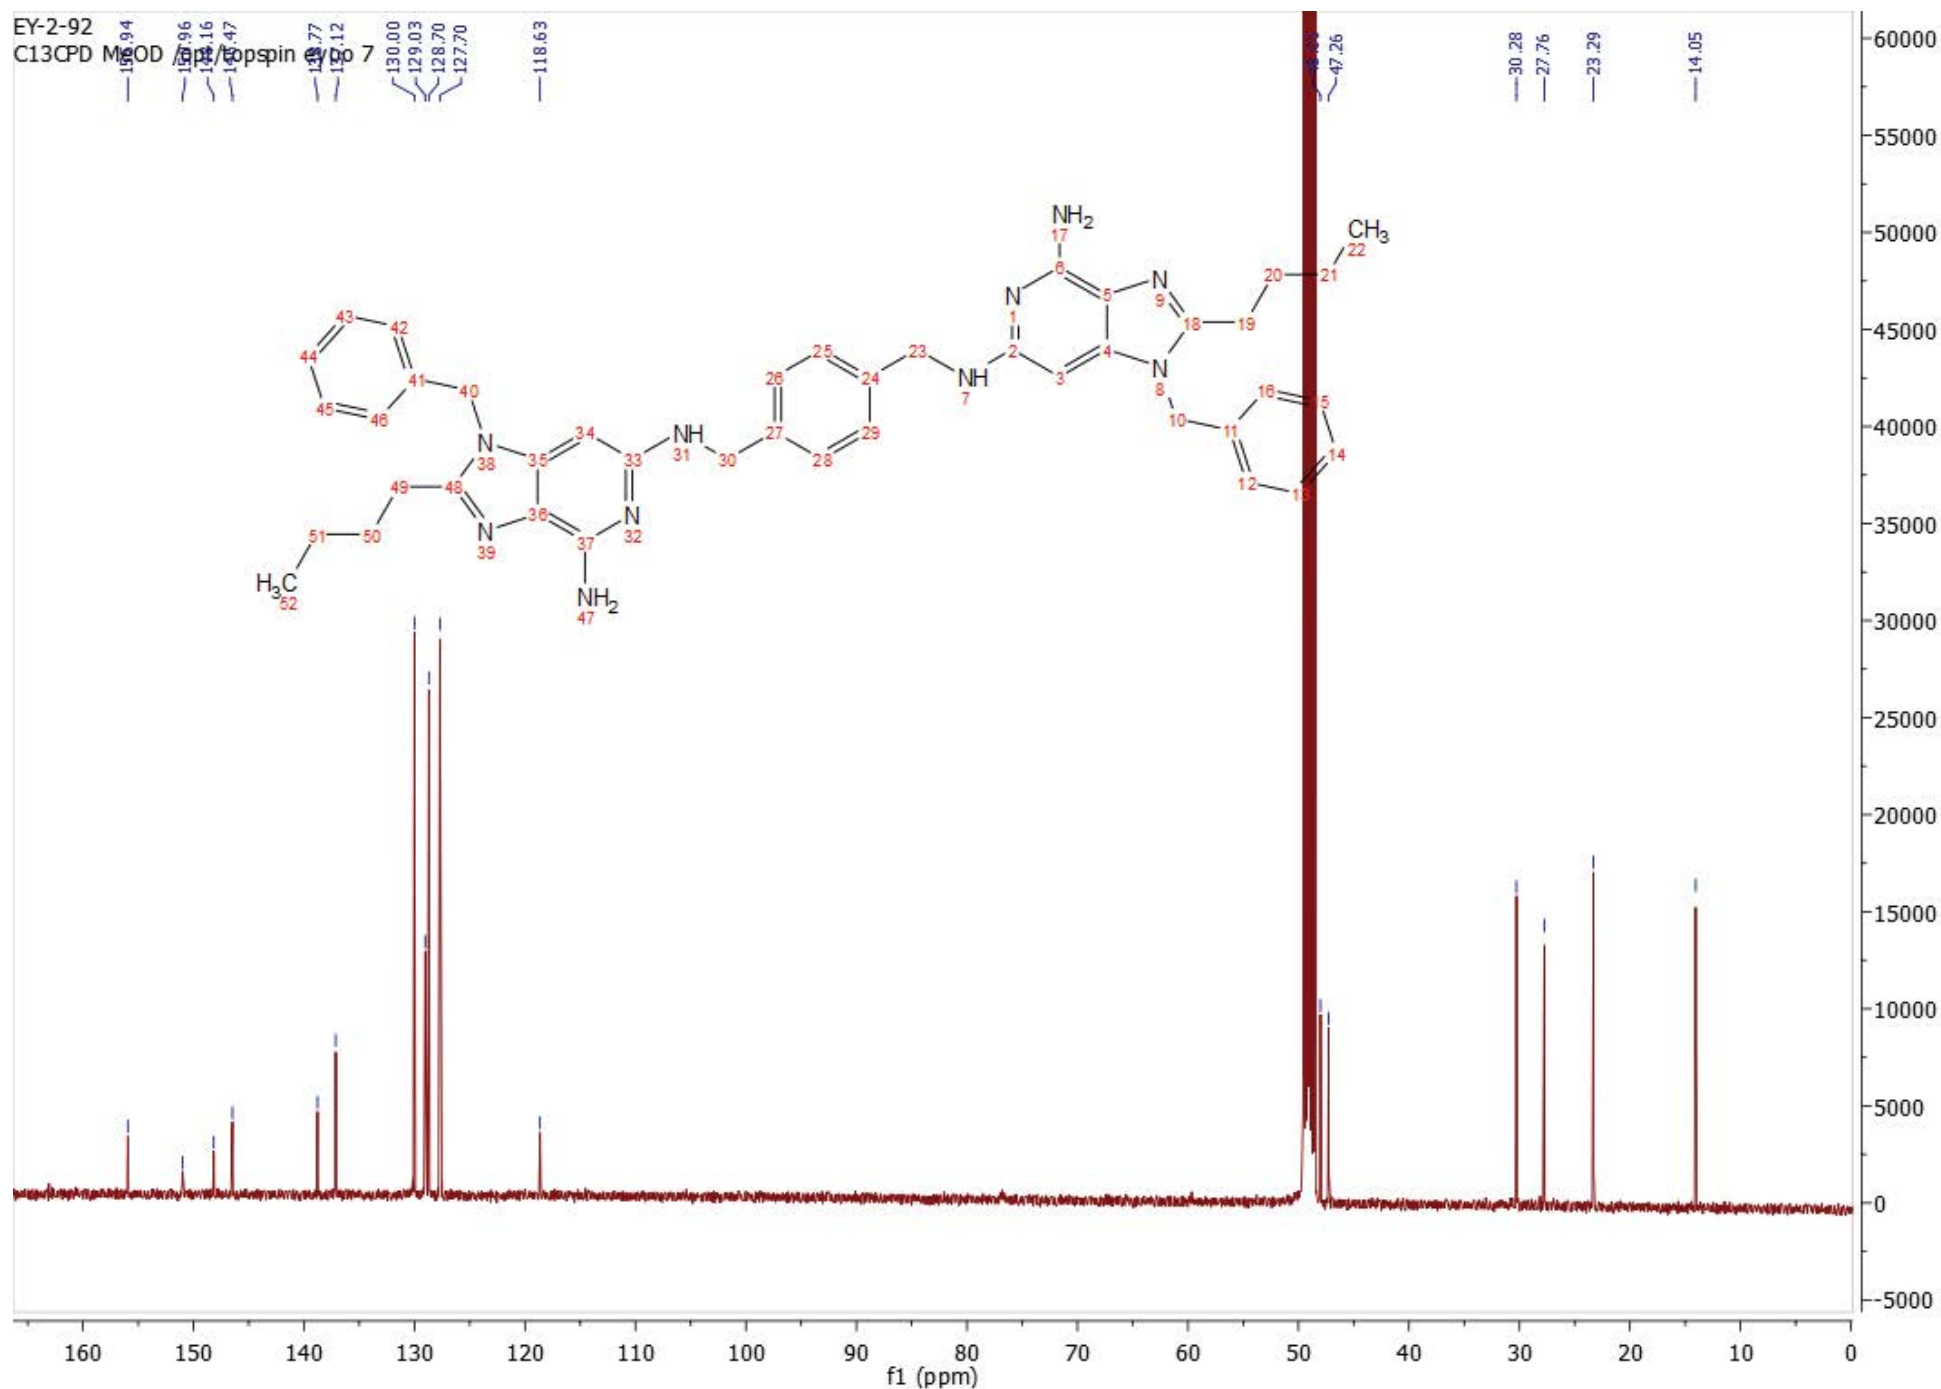



# 19r MS

|               |                      |             |                      |                 |              |                        |                      |
|---------------|----------------------|-------------|----------------------|-----------------|--------------|------------------------|----------------------|
| Sample Name   | 07.12.12 EY-2-92 tub | Position    | Vial 1               | Instrument Name | Instrument 1 | User Name              |                      |
| Inj Vol       | -1                   | InjPosition |                      | SampleType      | Sample       | IRM Calibration Status | Success              |
| Data Filename | 07.12.12 EY-2-92 tub | ACQ Method  | Water-ACN Infusion M | Comment         |              | Acquired Time          | 7/12/2012 1:08:33 PM |

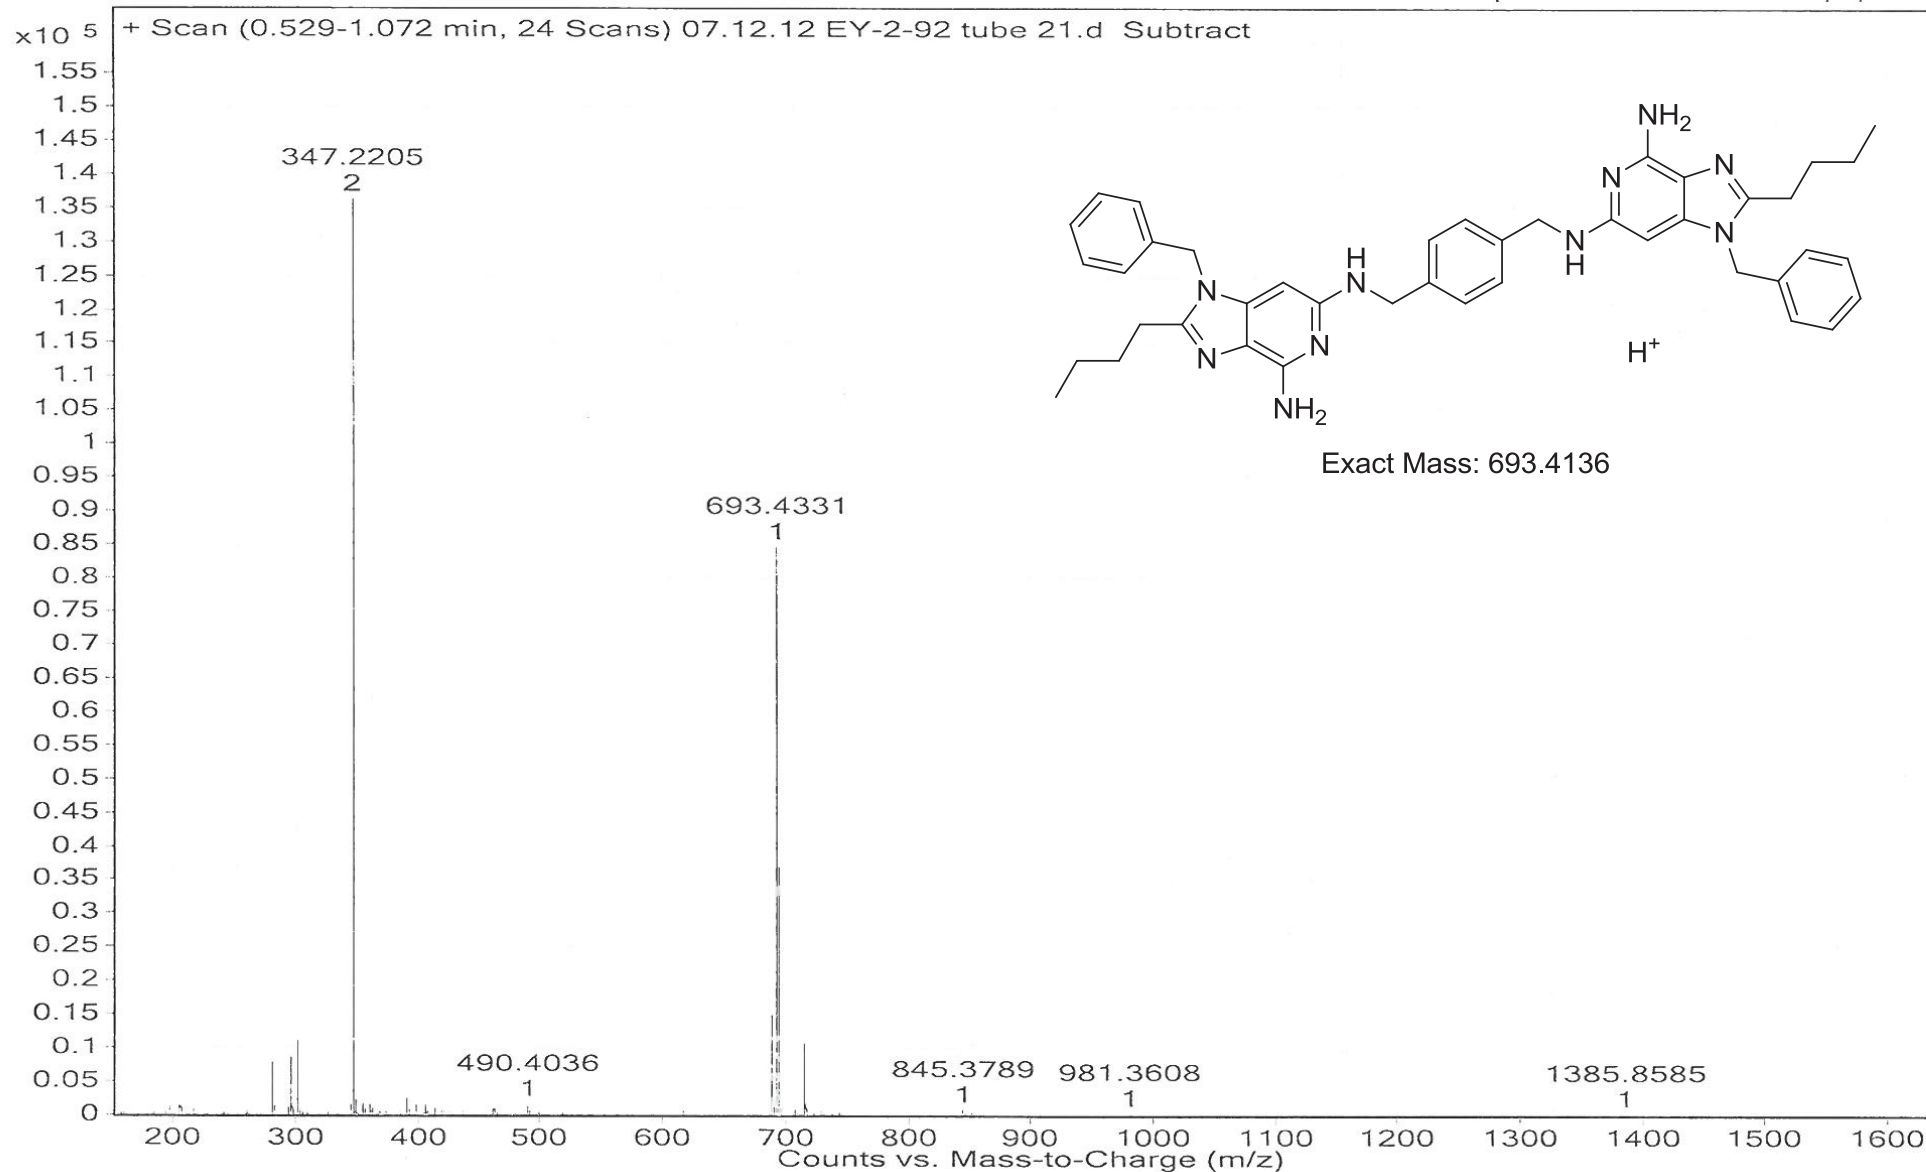

# 19s <sup>1</sup>H NMR

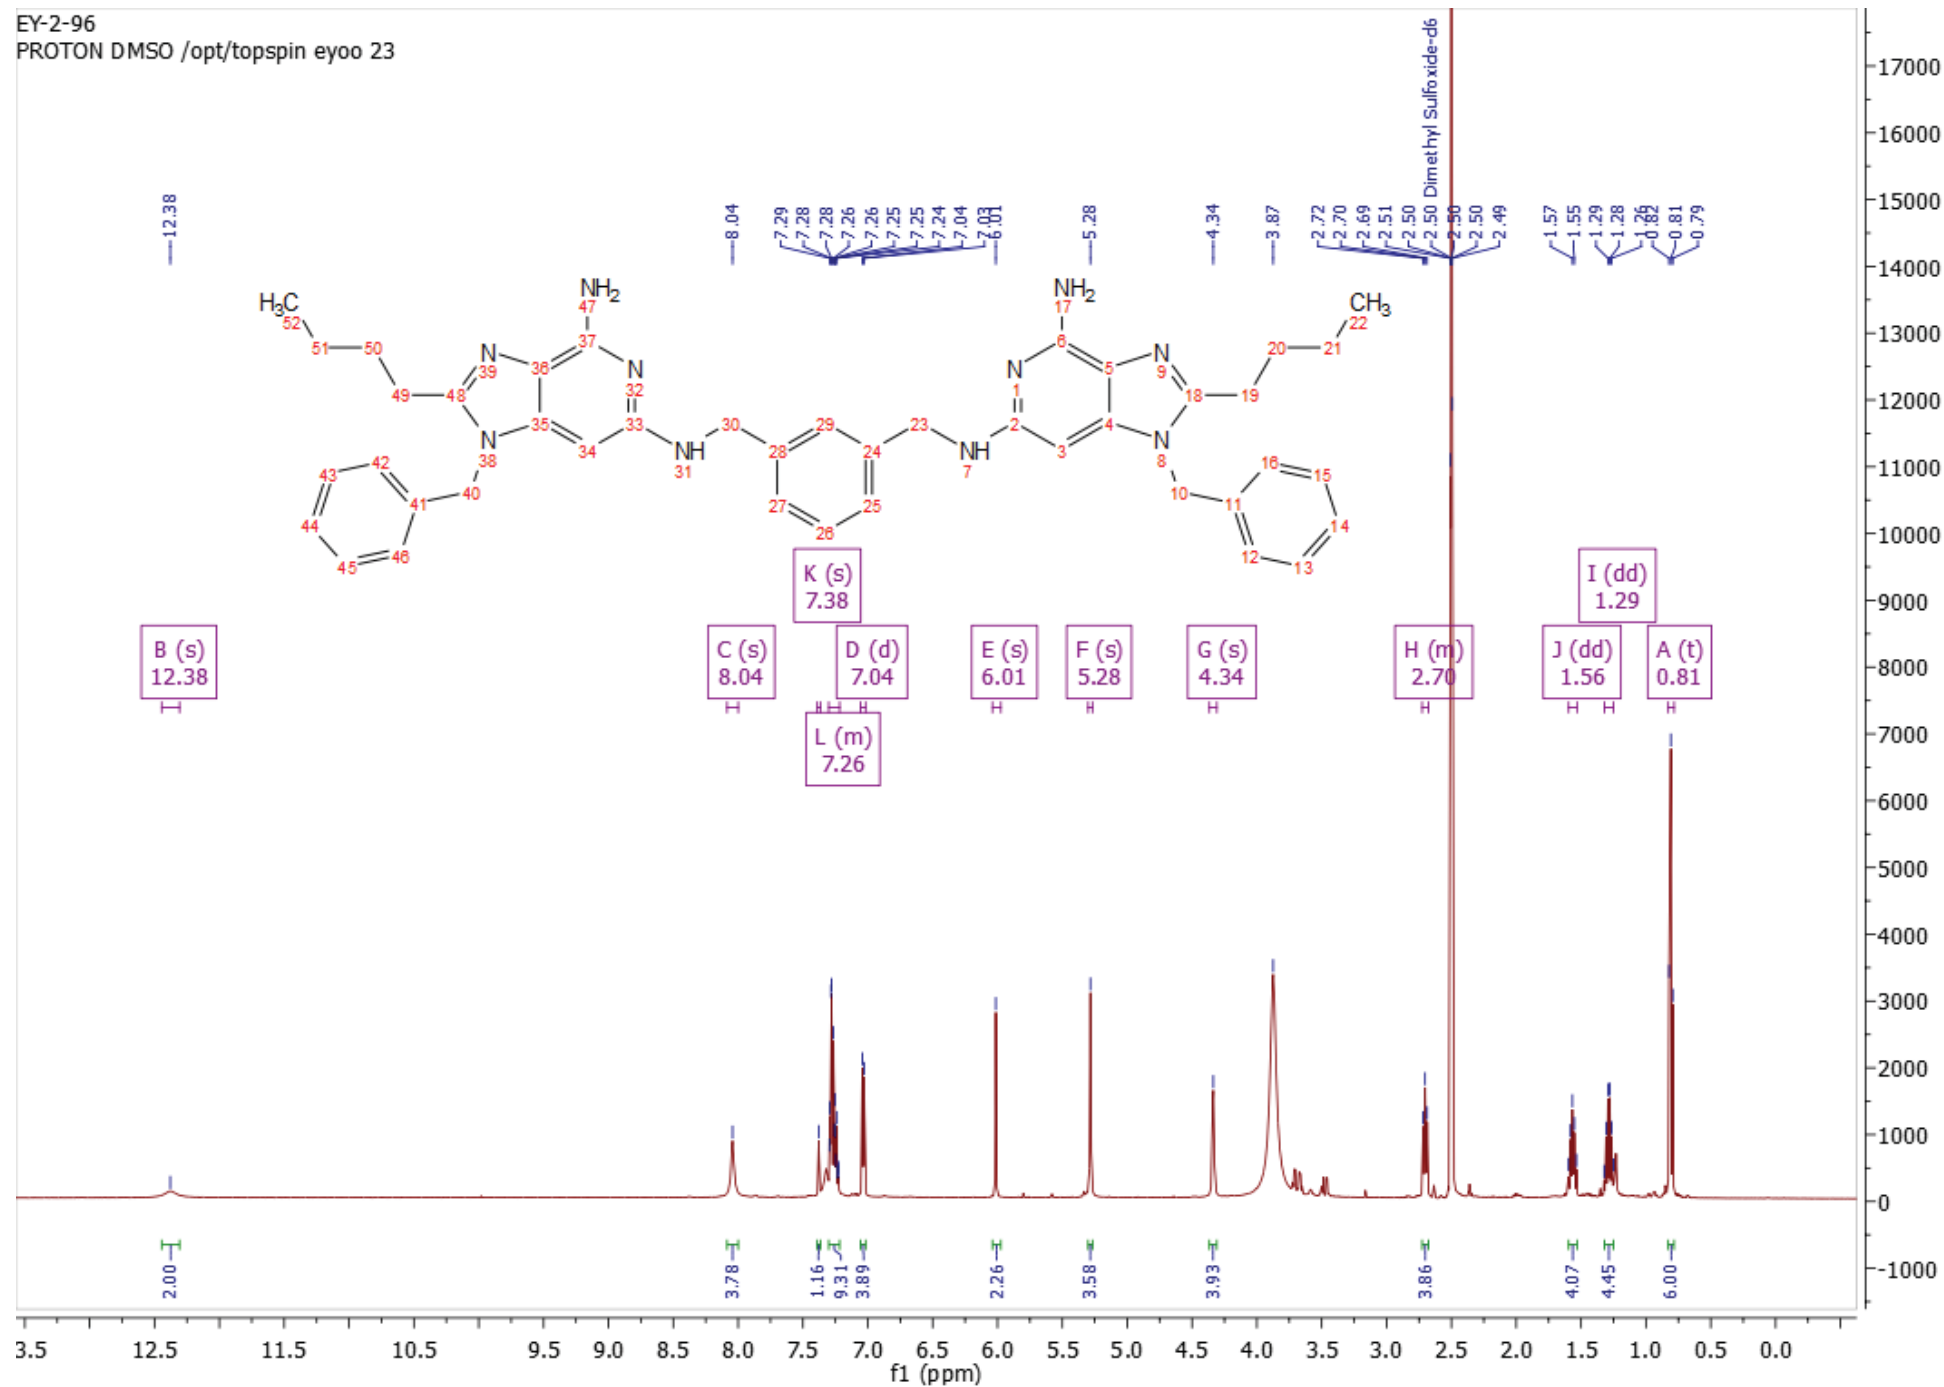

# **19s** <sup>13</sup>C NMR

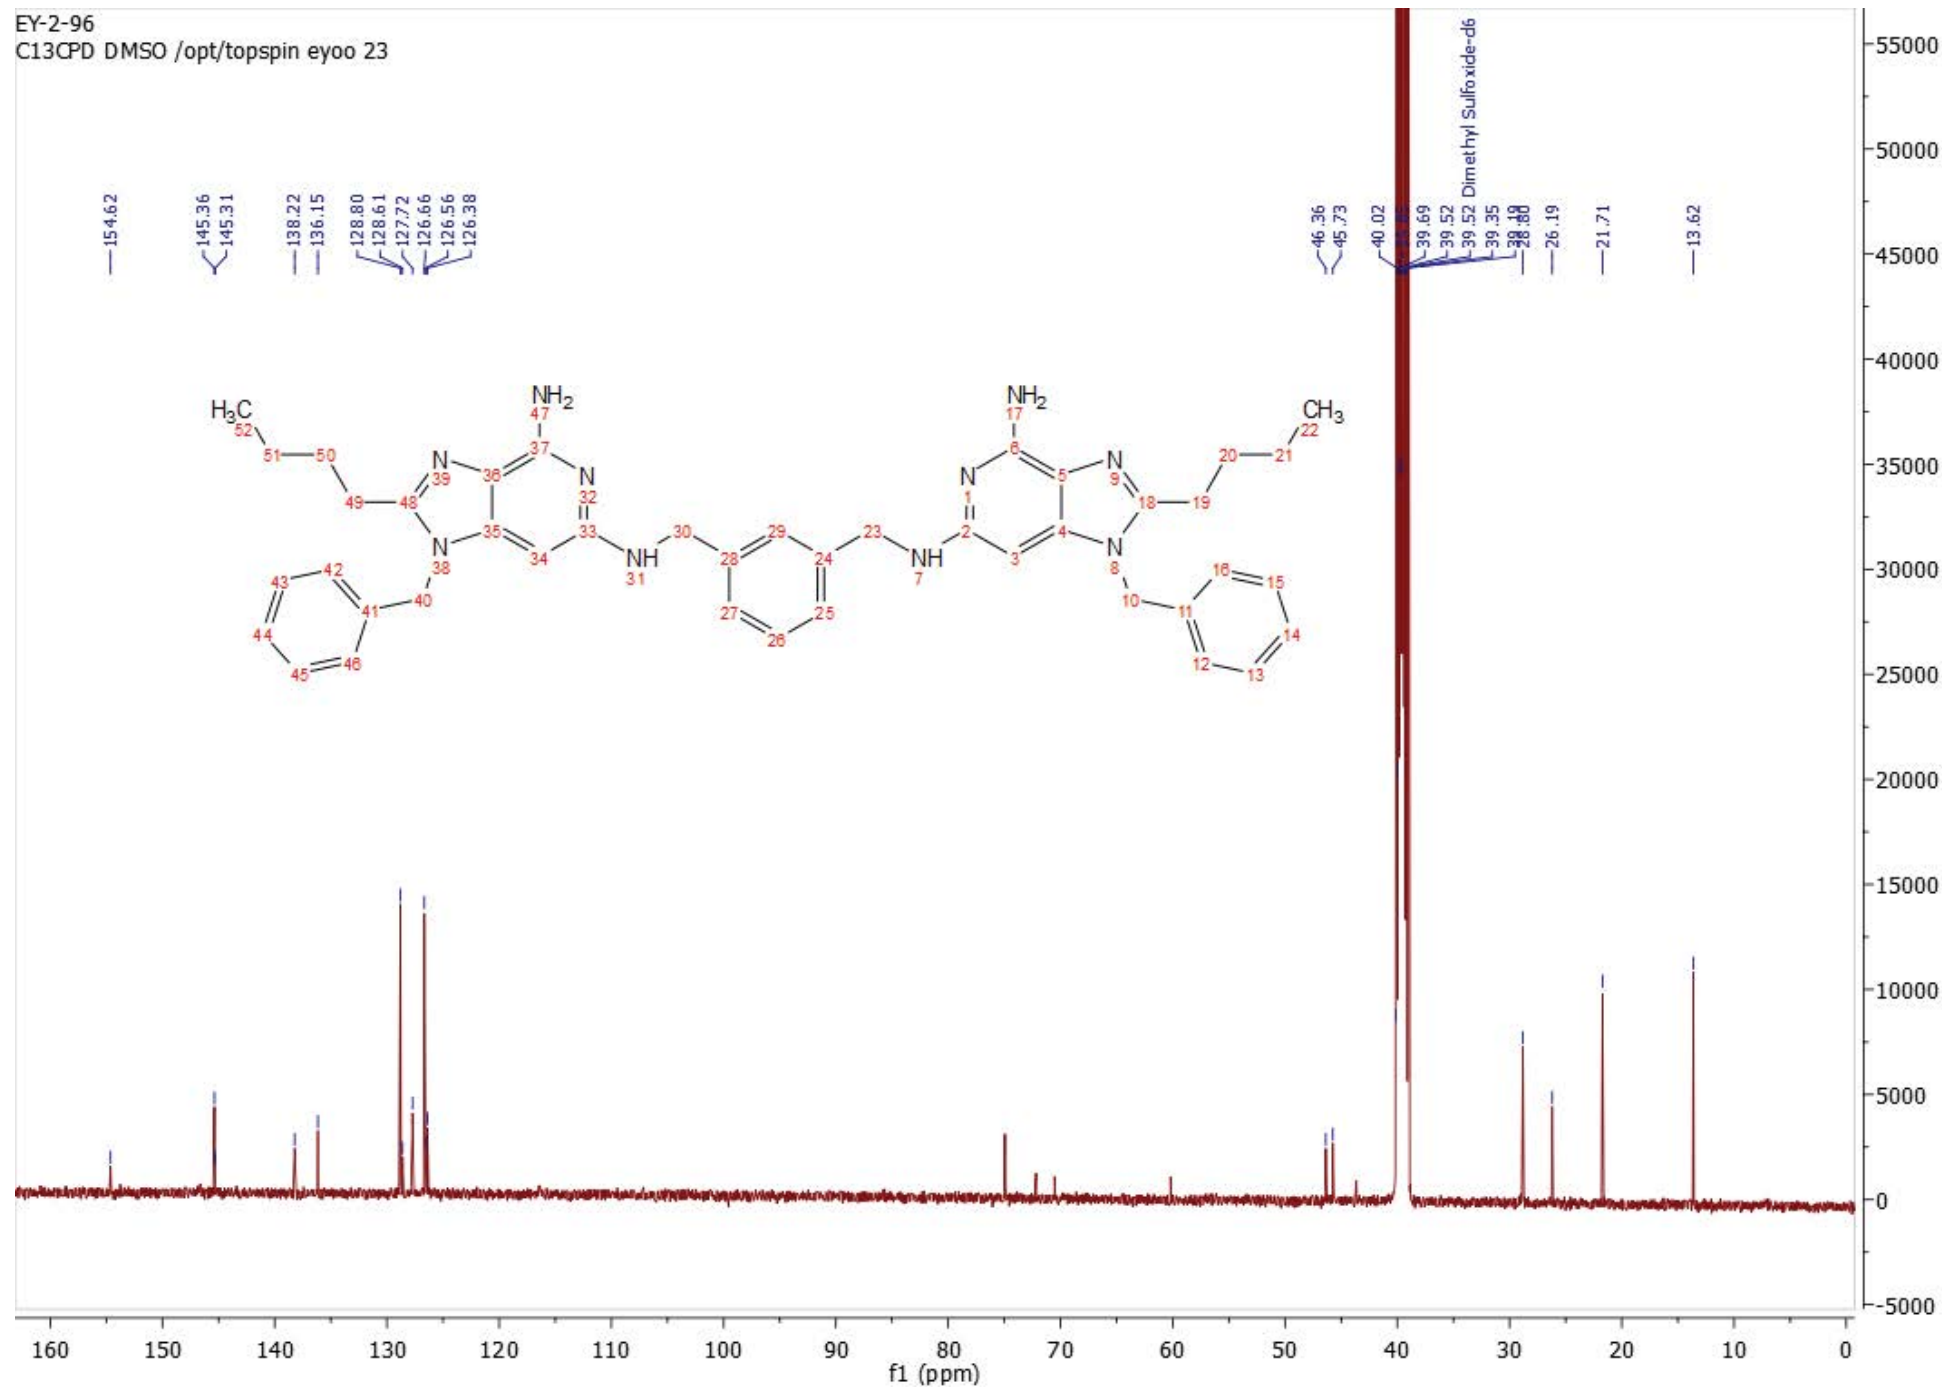

# 19s LC-MS

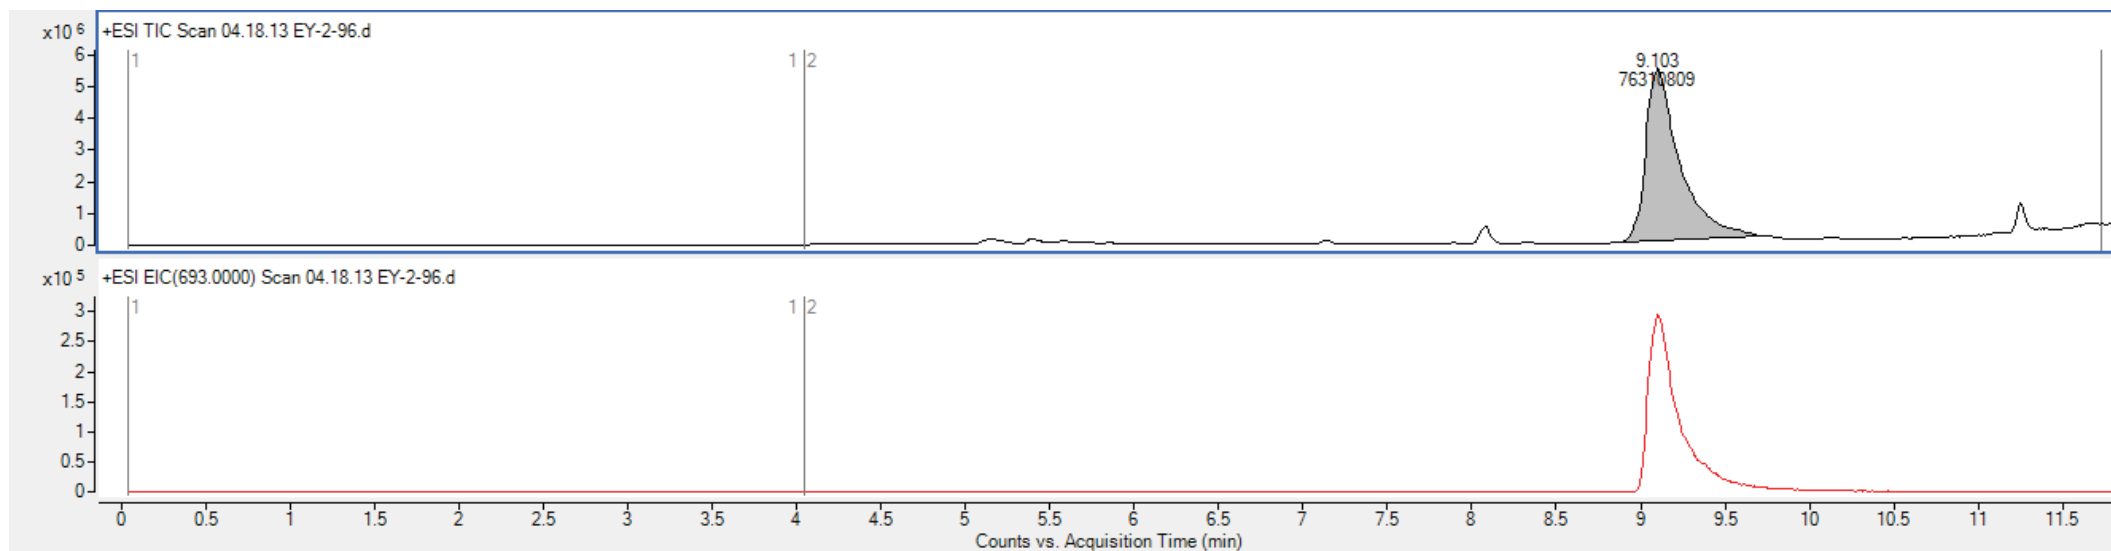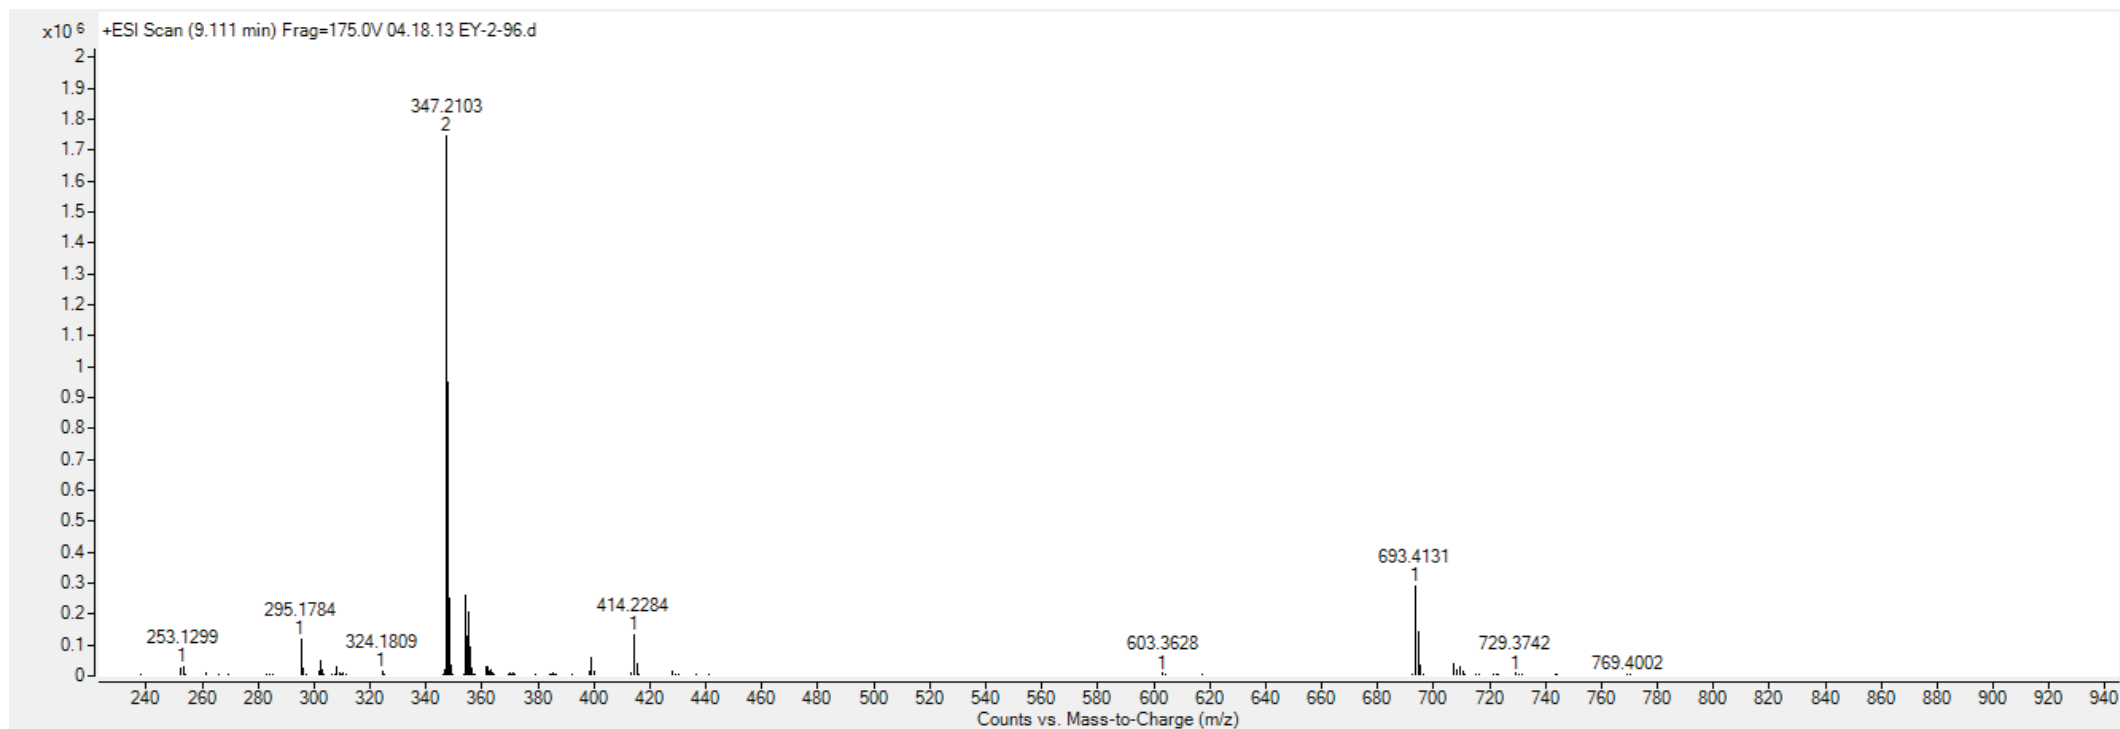

# 20a <sup>1</sup>H NMR

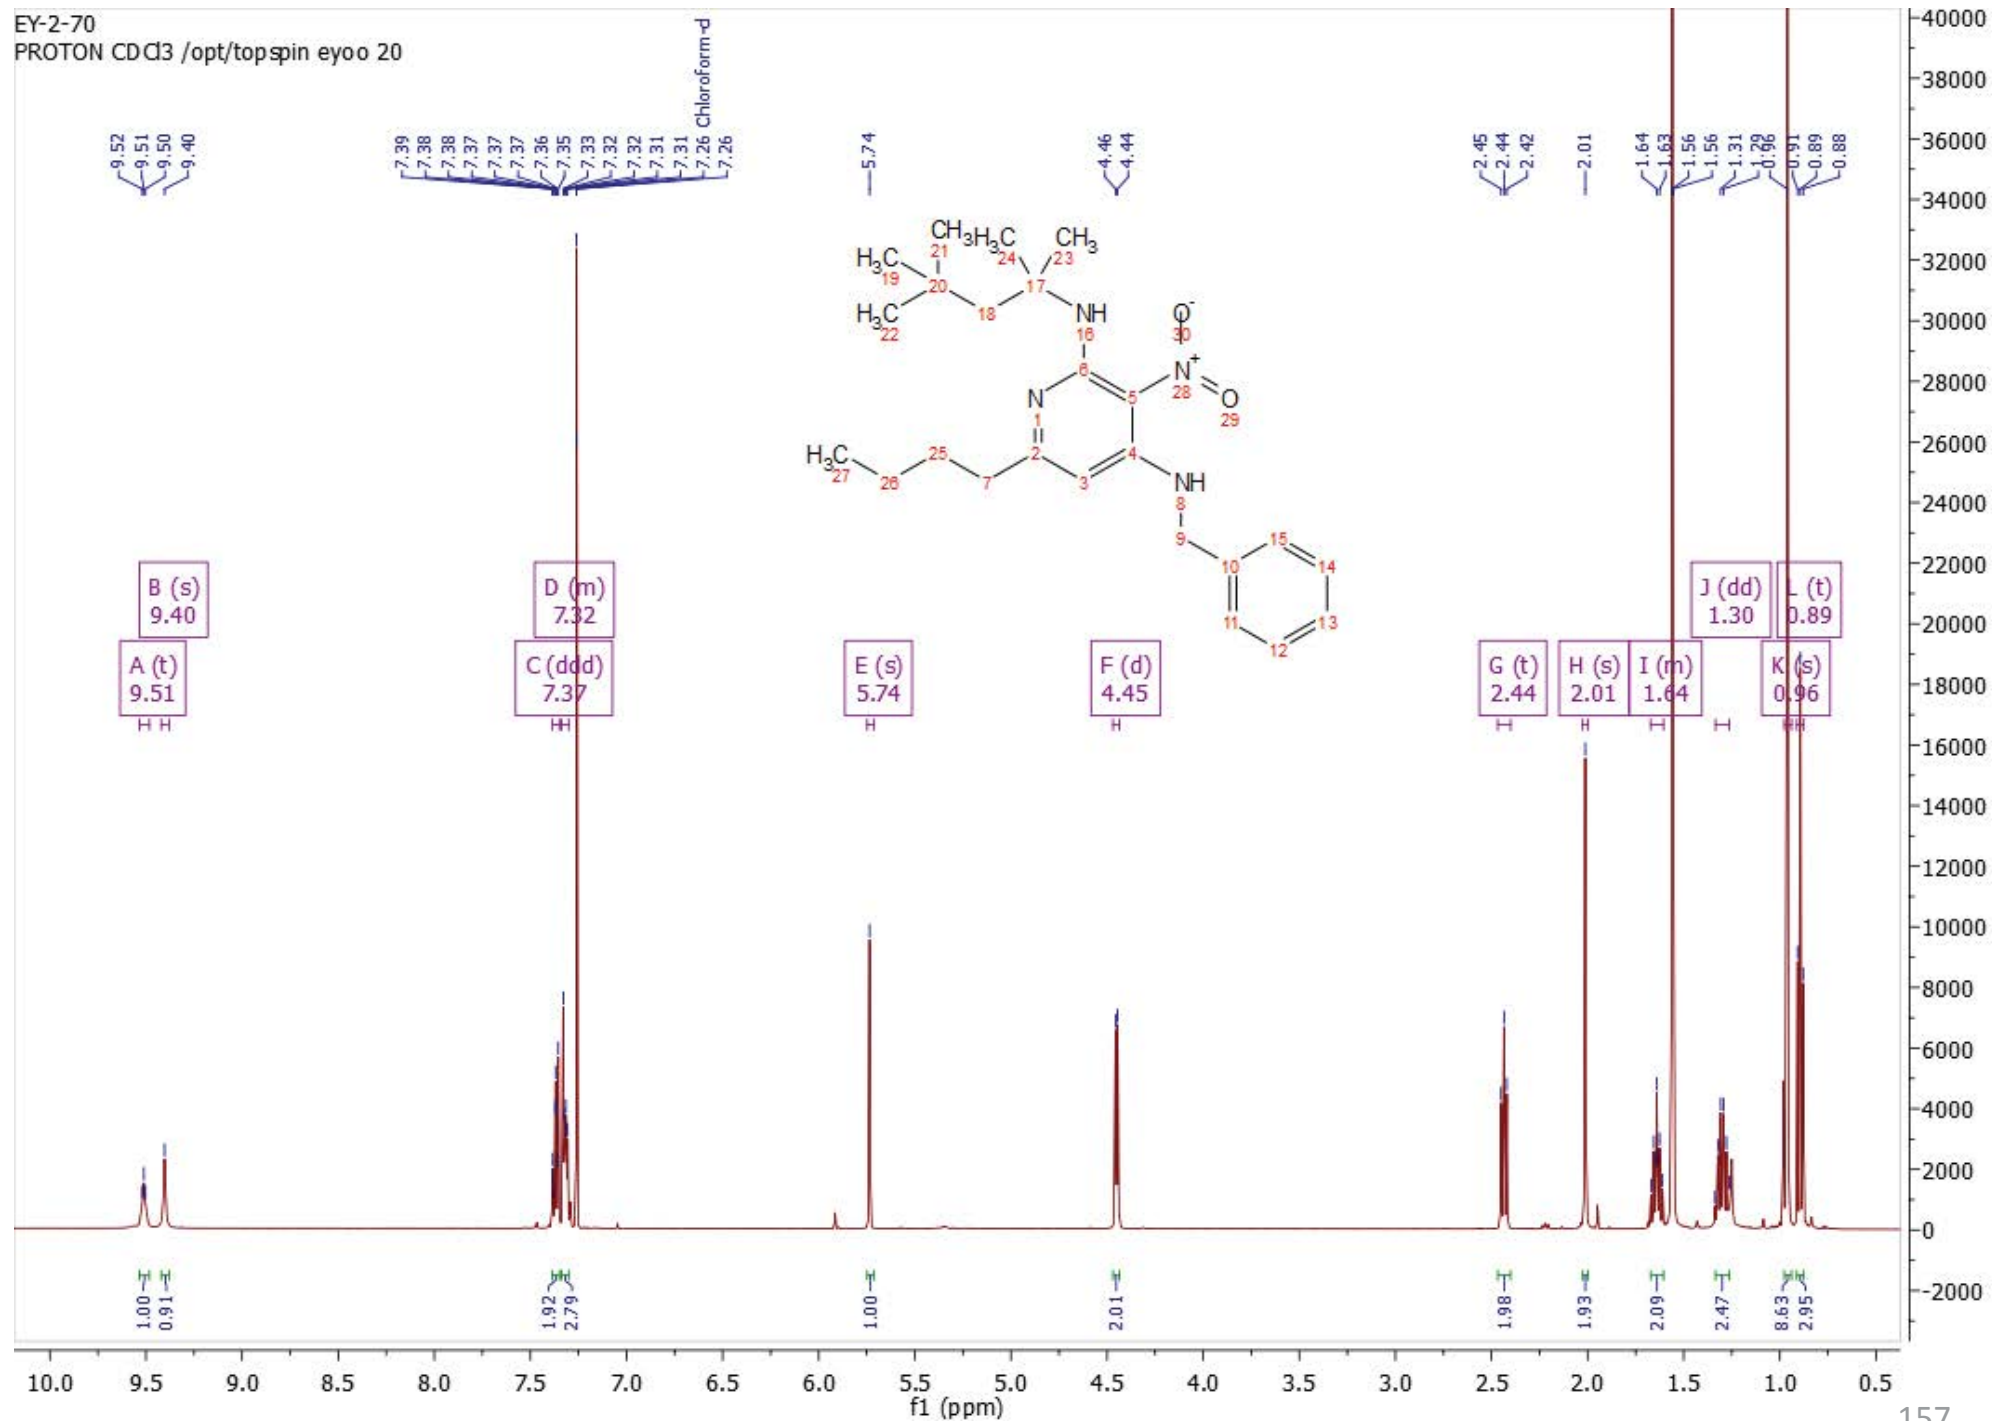

# 20a <sup>13</sup>C NMR

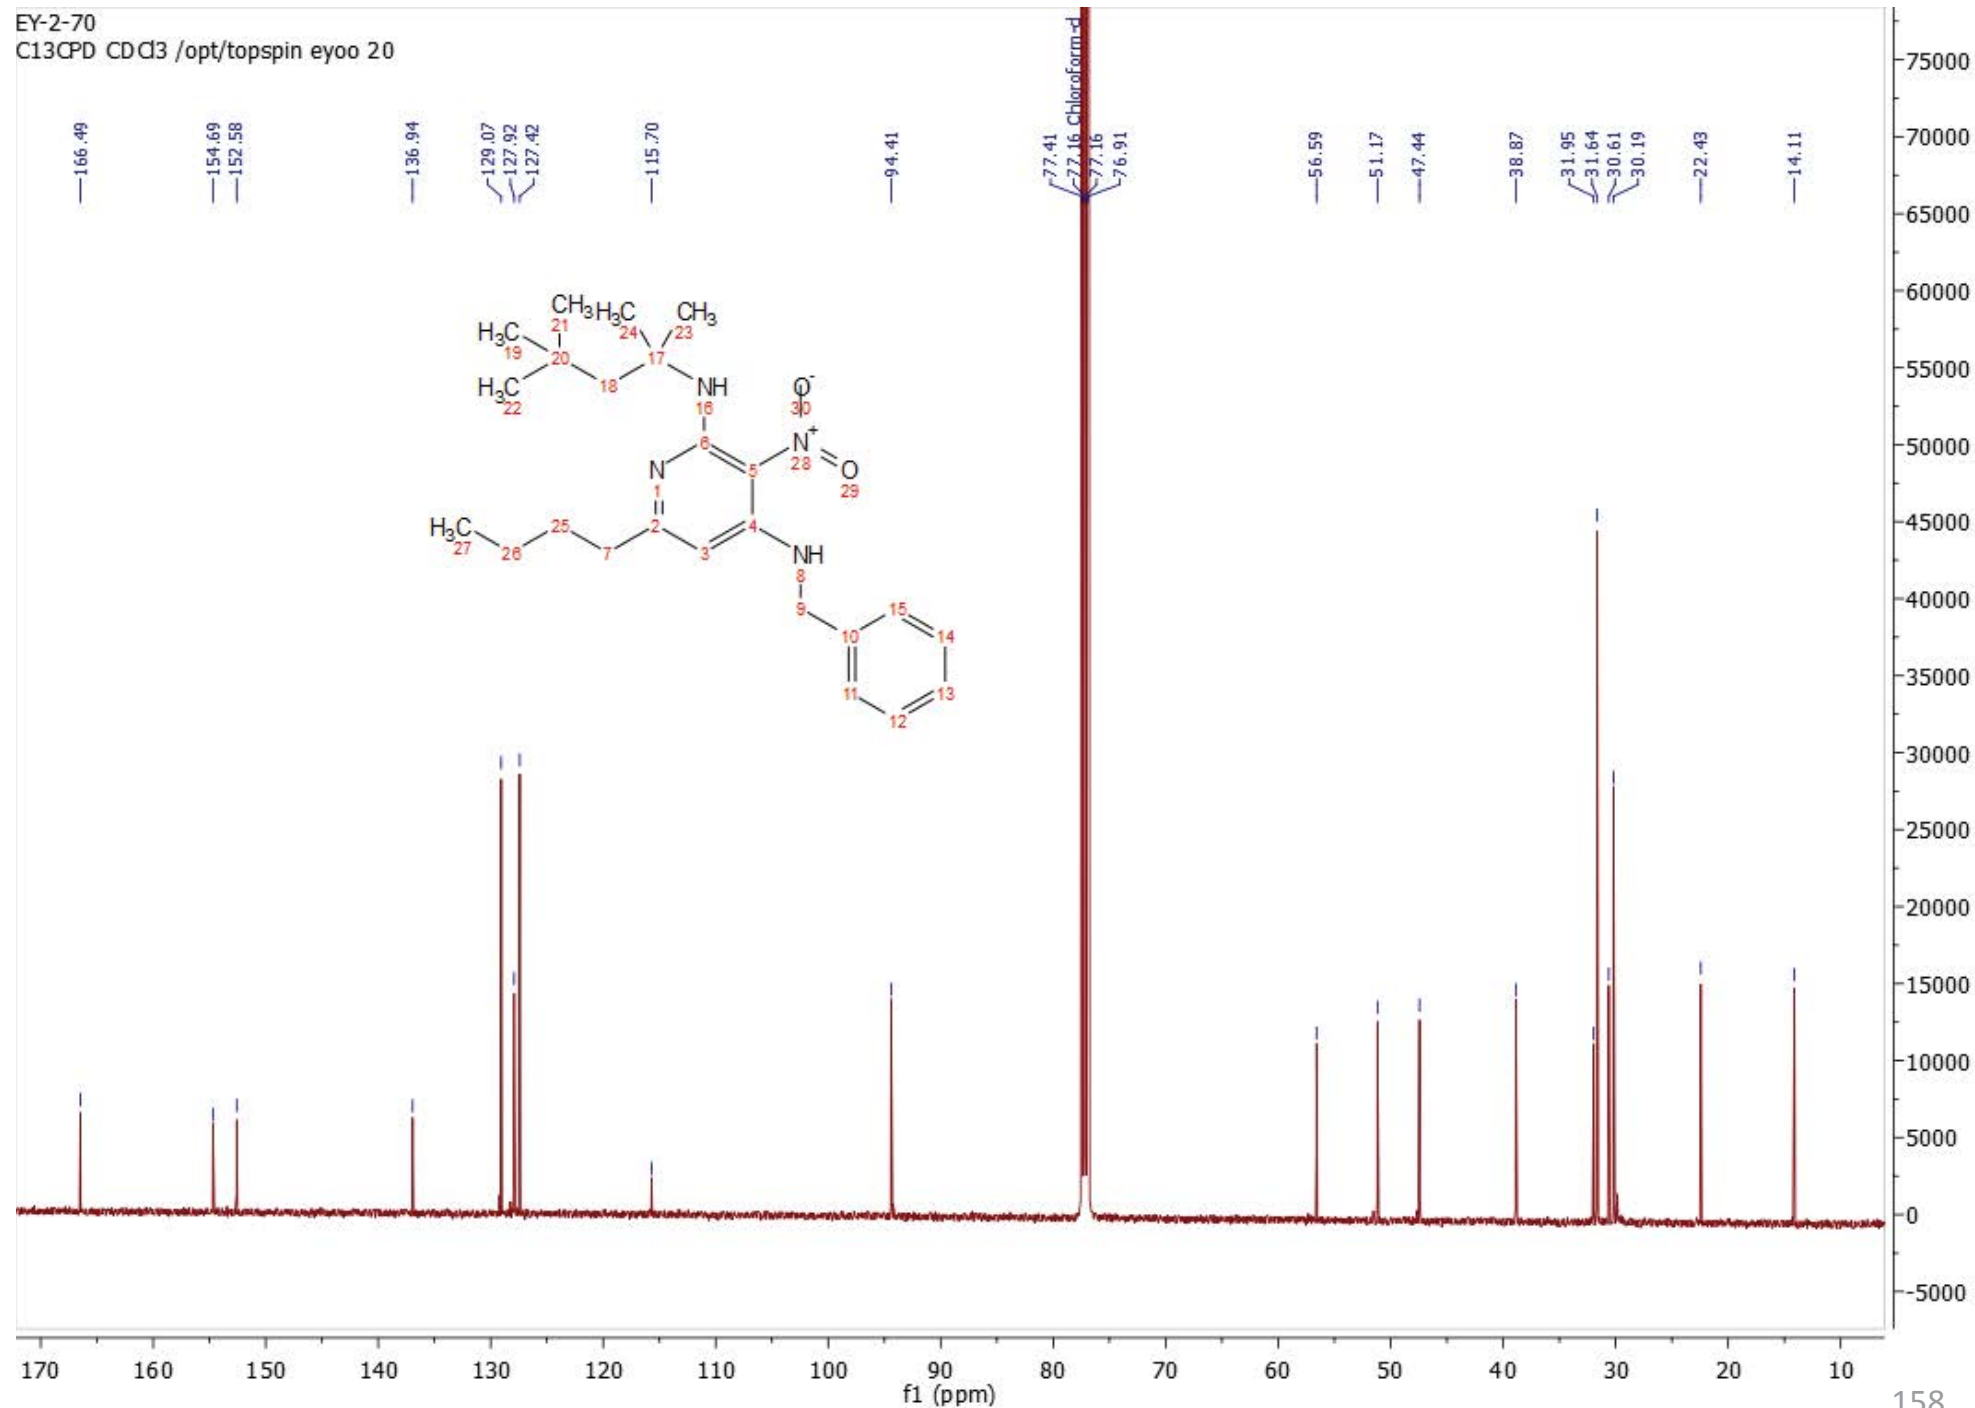

# 20a MS

| Sample Name   | 06.02.12 EY-2-70 tub | Position    | Vial 1               | Instrument Name | Instrument 1 | User Name              |                      |
|---------------|----------------------|-------------|----------------------|-----------------|--------------|------------------------|----------------------|
| Inj Vol       | -1                   | InjPosition |                      | SampleType      | Sample       | IRM Calibration Status | Success              |
| Data Filename | 06.02.12 EY-2-70 tub | ACQ Method  | Water-ACN Infusion M | Comment         |              | Acquired Time          | 6/2/2012 11:37:18 AM |

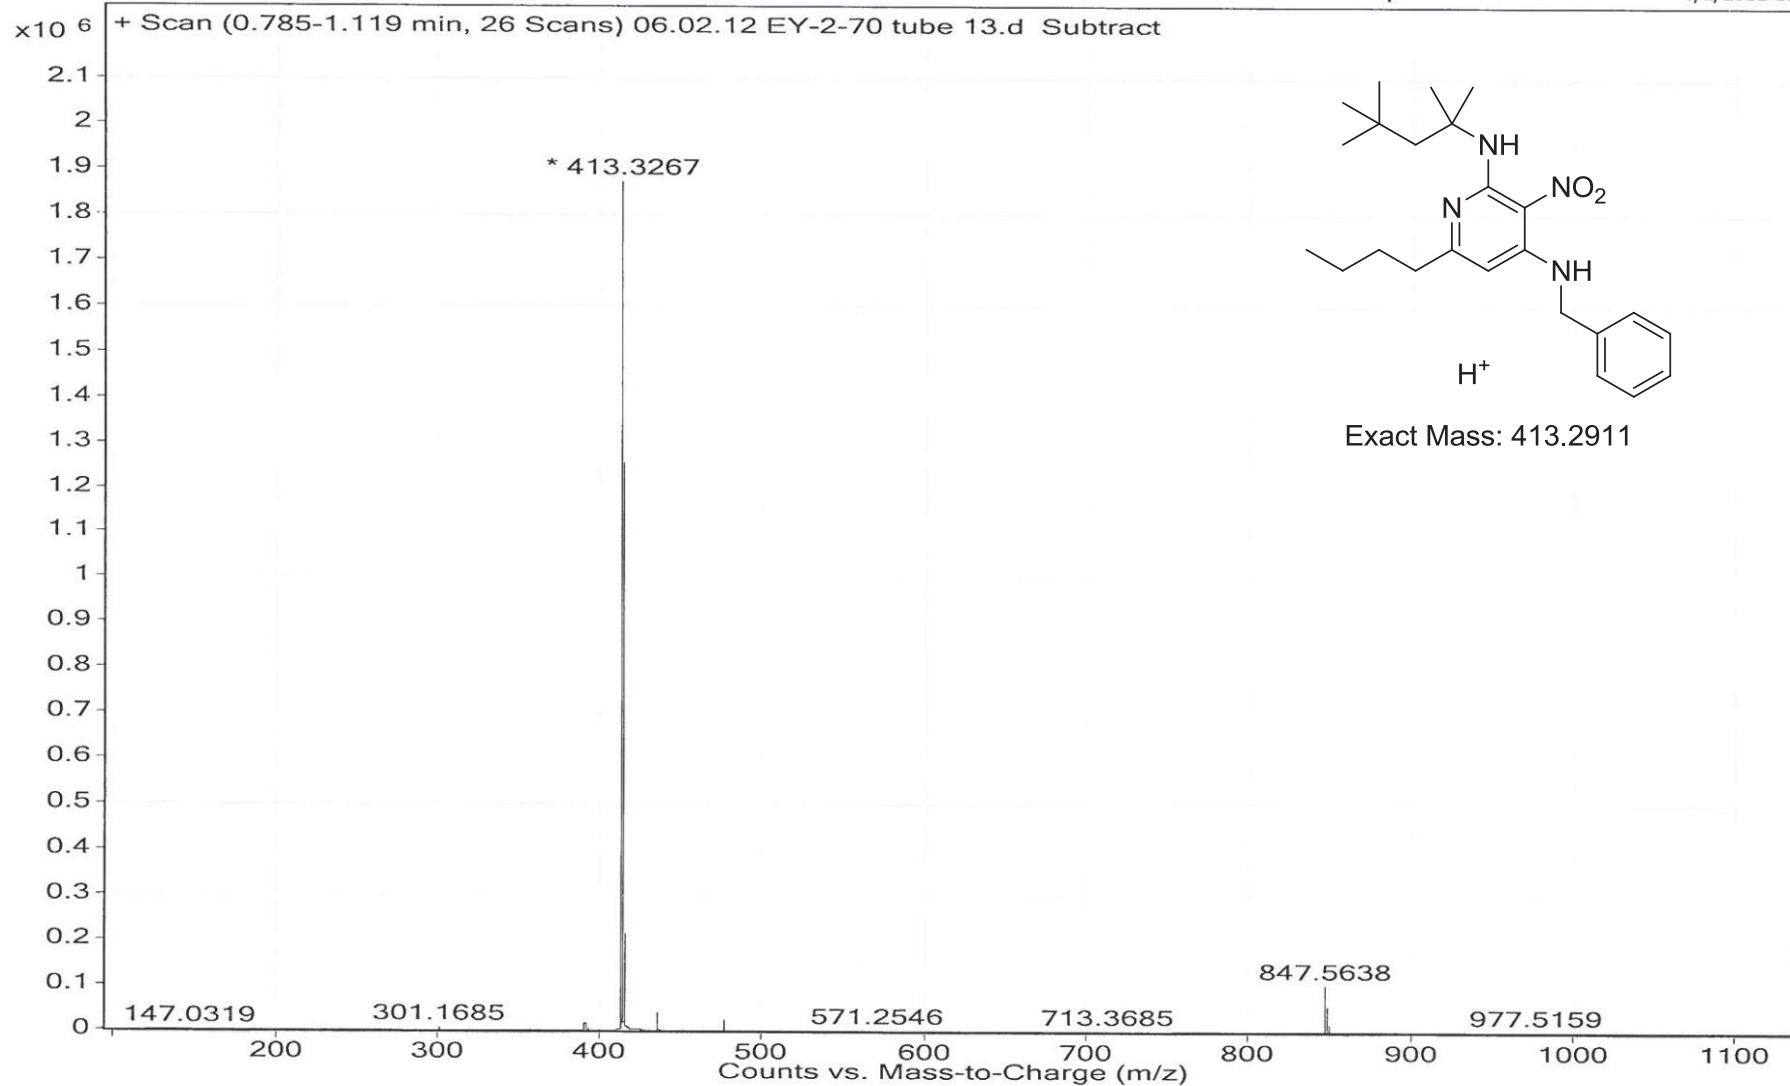



## 21a MS

|               |                    |             |                      |                 |              |                        |                      |
|---------------|--------------------|-------------|----------------------|-----------------|--------------|------------------------|----------------------|
| Sample Name   | 06.04.12 EY-2-71   | Position    | Vial 1               | Instrument Name | Instrument 1 | User Name              |                      |
| Inj Vol       | -1                 | InjPosition |                      | SampleType      | Sample       | IRM Calibration Status | Success              |
| Data Filename | 06.04.12 EY-2-71.d | ACQ Method  | Water-ACN Infusion M | Comment         |              | Acquired Time          | 6/4/2012 11:22:31 AM |

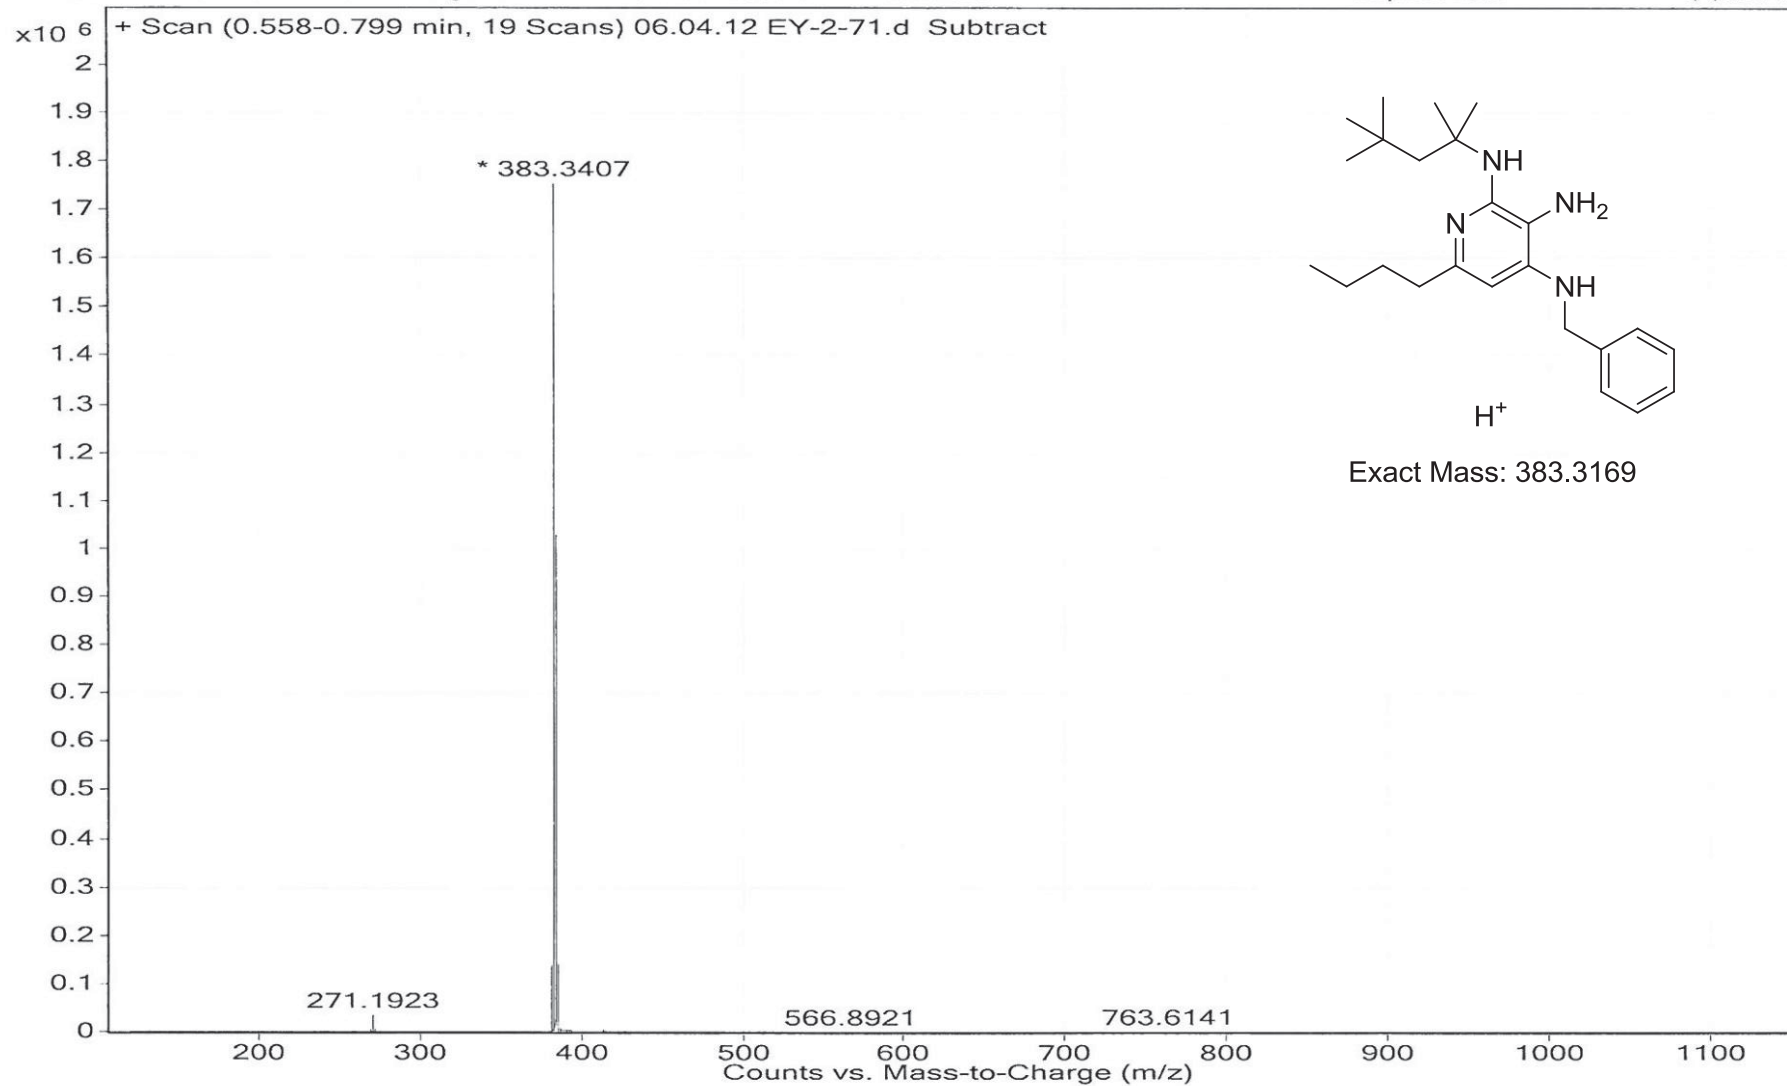

## 22a MS

|               |                      |             |                      |                 |              |                        |                     |
|---------------|----------------------|-------------|----------------------|-----------------|--------------|------------------------|---------------------|
| Sample Name   | 06.05.12 EY-2-72 tub | Position    | Vial 1               | Instrument Name | Instrument 1 | User Name              |                     |
| Inj Vol       | -1                   | InjPosition |                      | SampleType      | Sample       | IRM Calibration Status | Success             |
| Data Filename | 06.05.12 EY-2-72 tub | ACQ Method  | Water-ACN Infusion M | Comment         |              | Acquired Time          | 6/5/2012 1:40:46 PM |

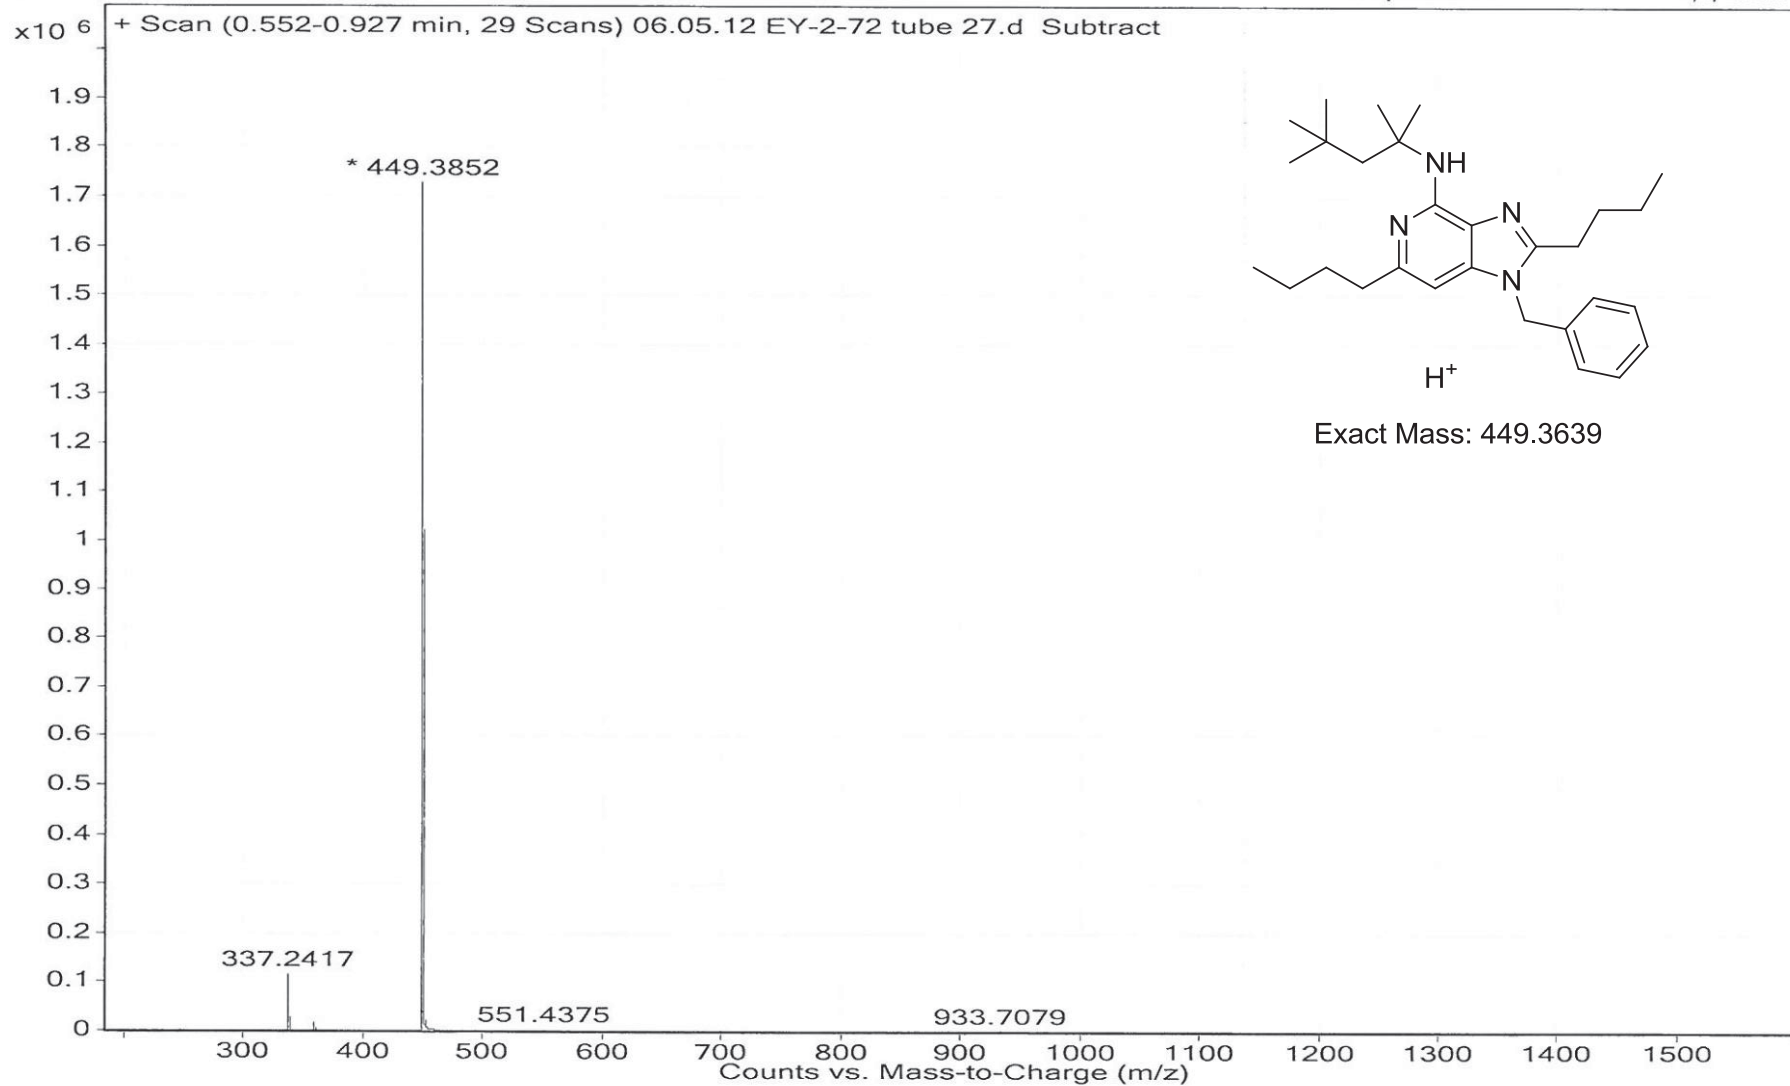

# 23a <sup>1</sup>H NMR

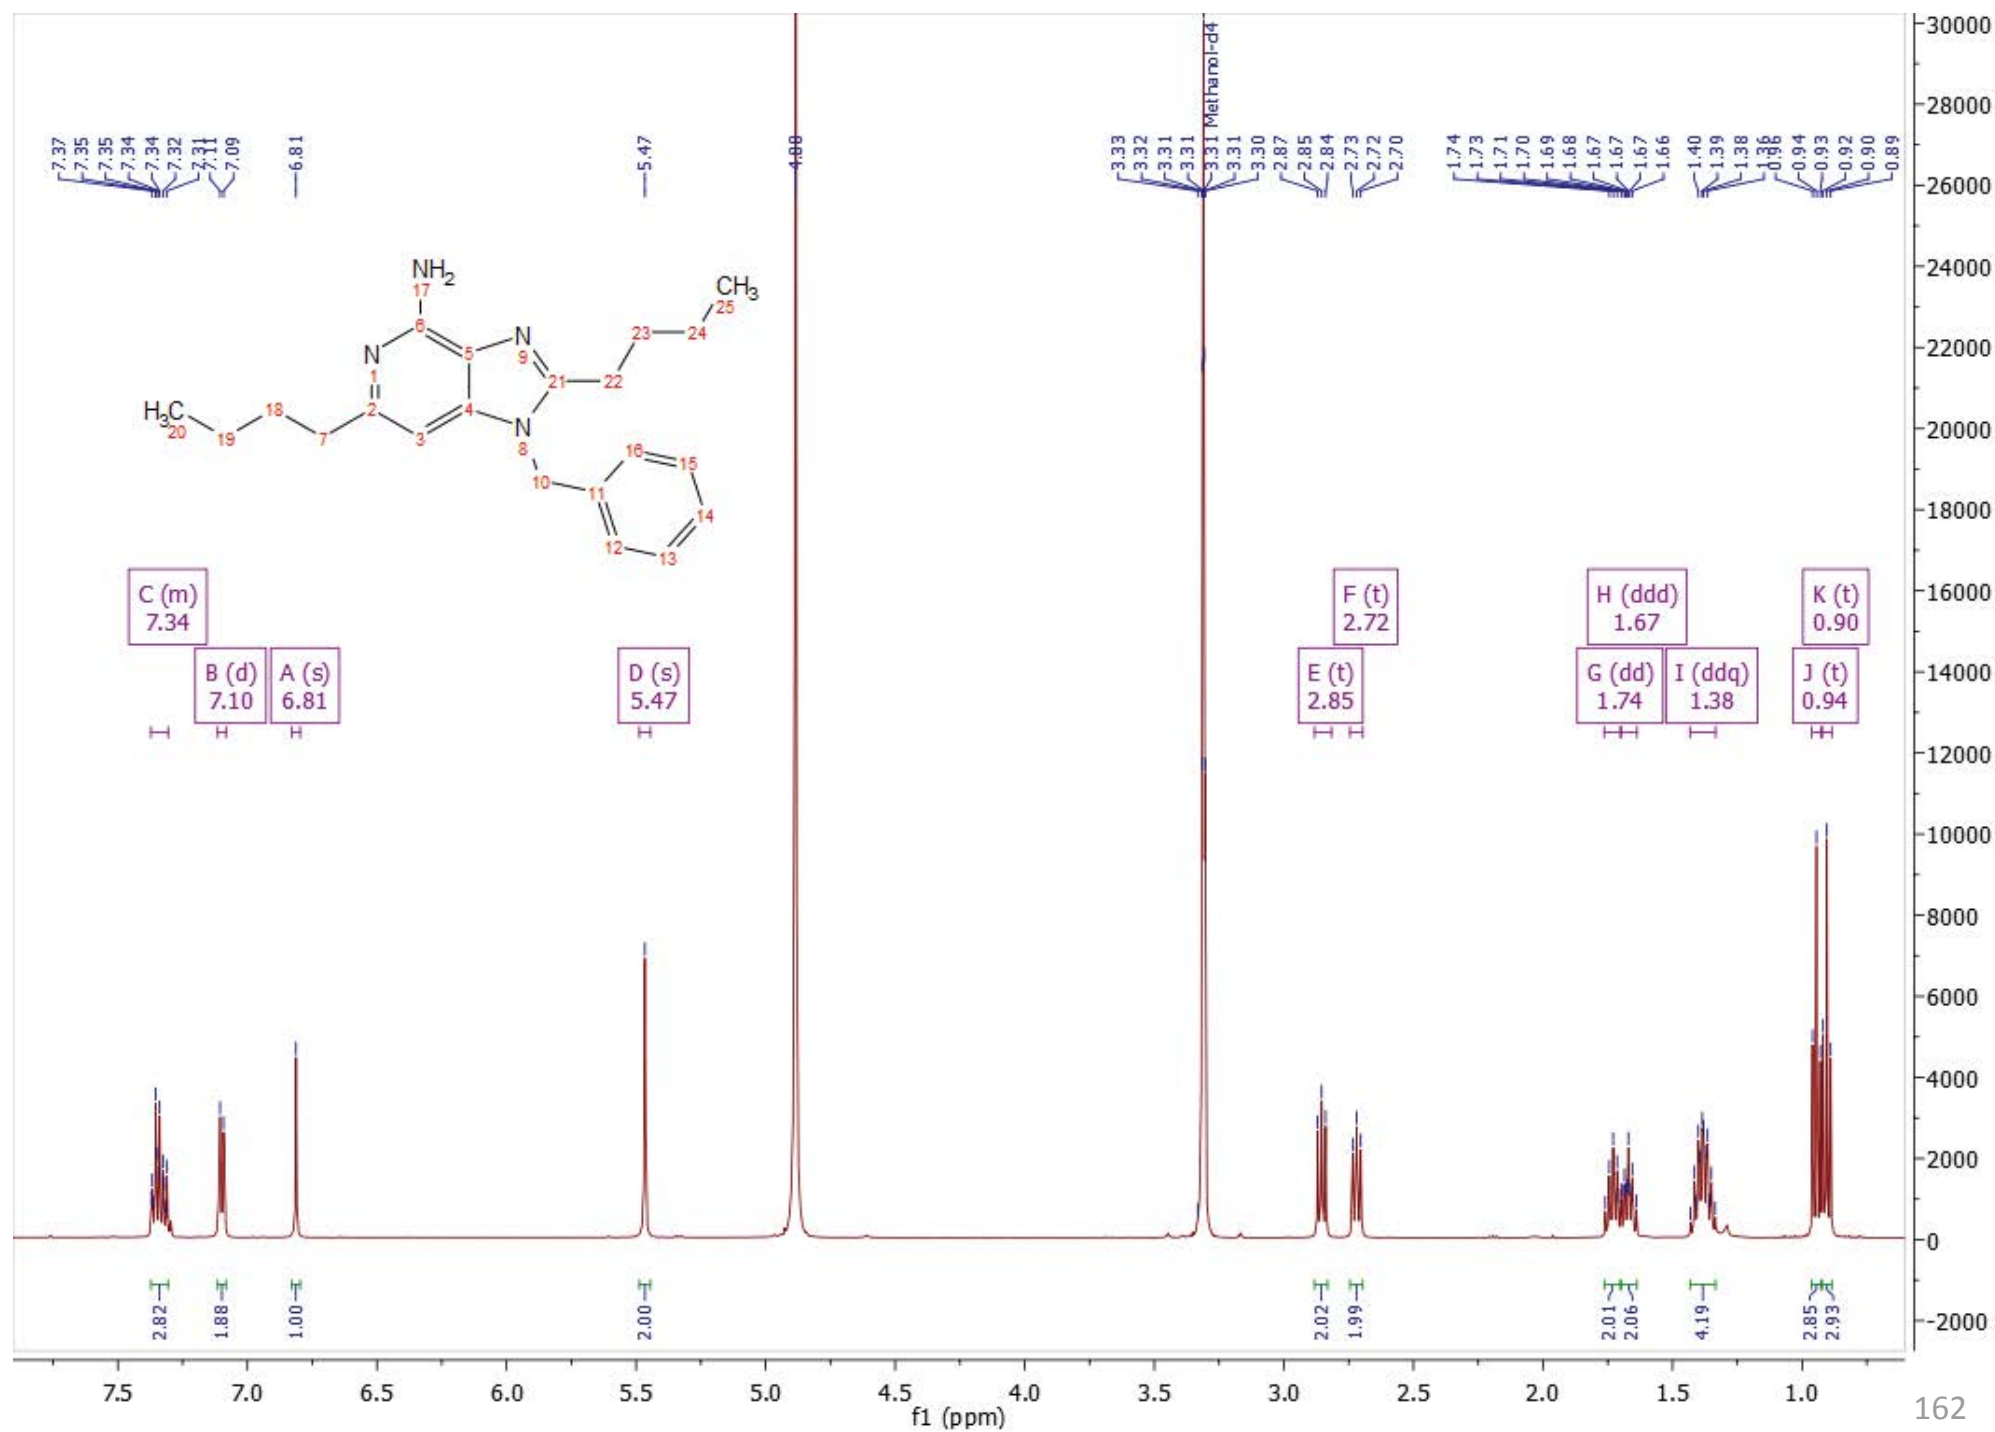

# 23a <sup>13</sup>C NMR

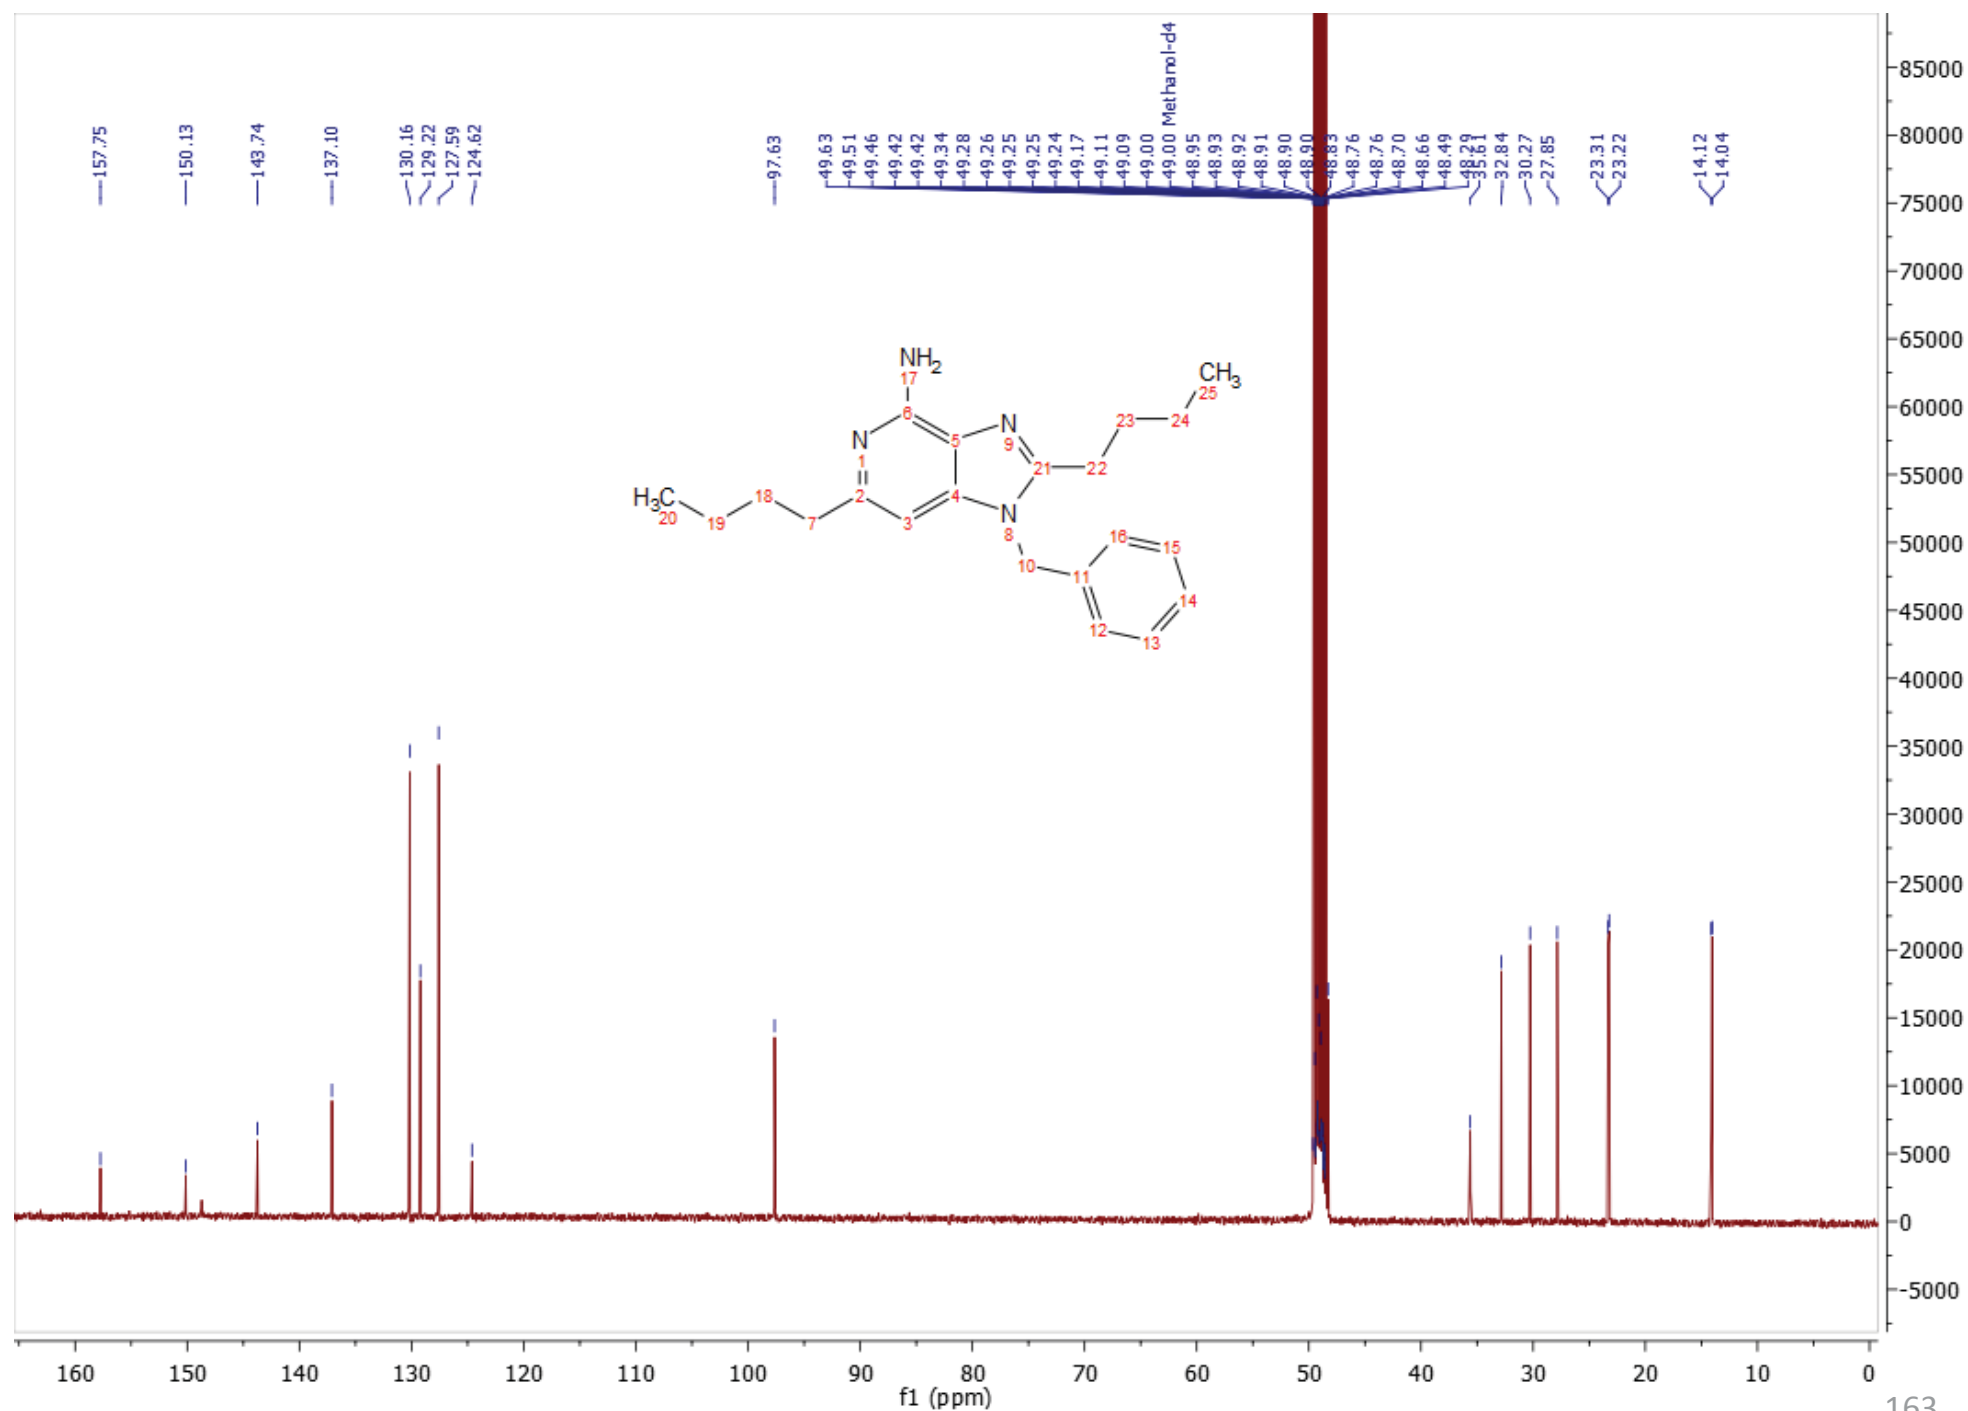

# 23a MS

|               |                      |             |                      |                 |              |                        |                     |
|---------------|----------------------|-------------|----------------------|-----------------|--------------|------------------------|---------------------|
| Sample Name   | 06.05.12 EY-2-77 tub | Position    | Vial 1               | Instrument Name | Instrument 1 | User Name              |                     |
| Inj Vol       | -1                   | InjPosition |                      | SampleType      | Sample       | IRM Calibration Status | Success             |
| Data Filename | 06.05.12 EY-2-77 tub | ACQ Method  | Water-ACN Infusion M | Comment         |              | Acquired Time          | 6/5/2012 4:51:04 PM |

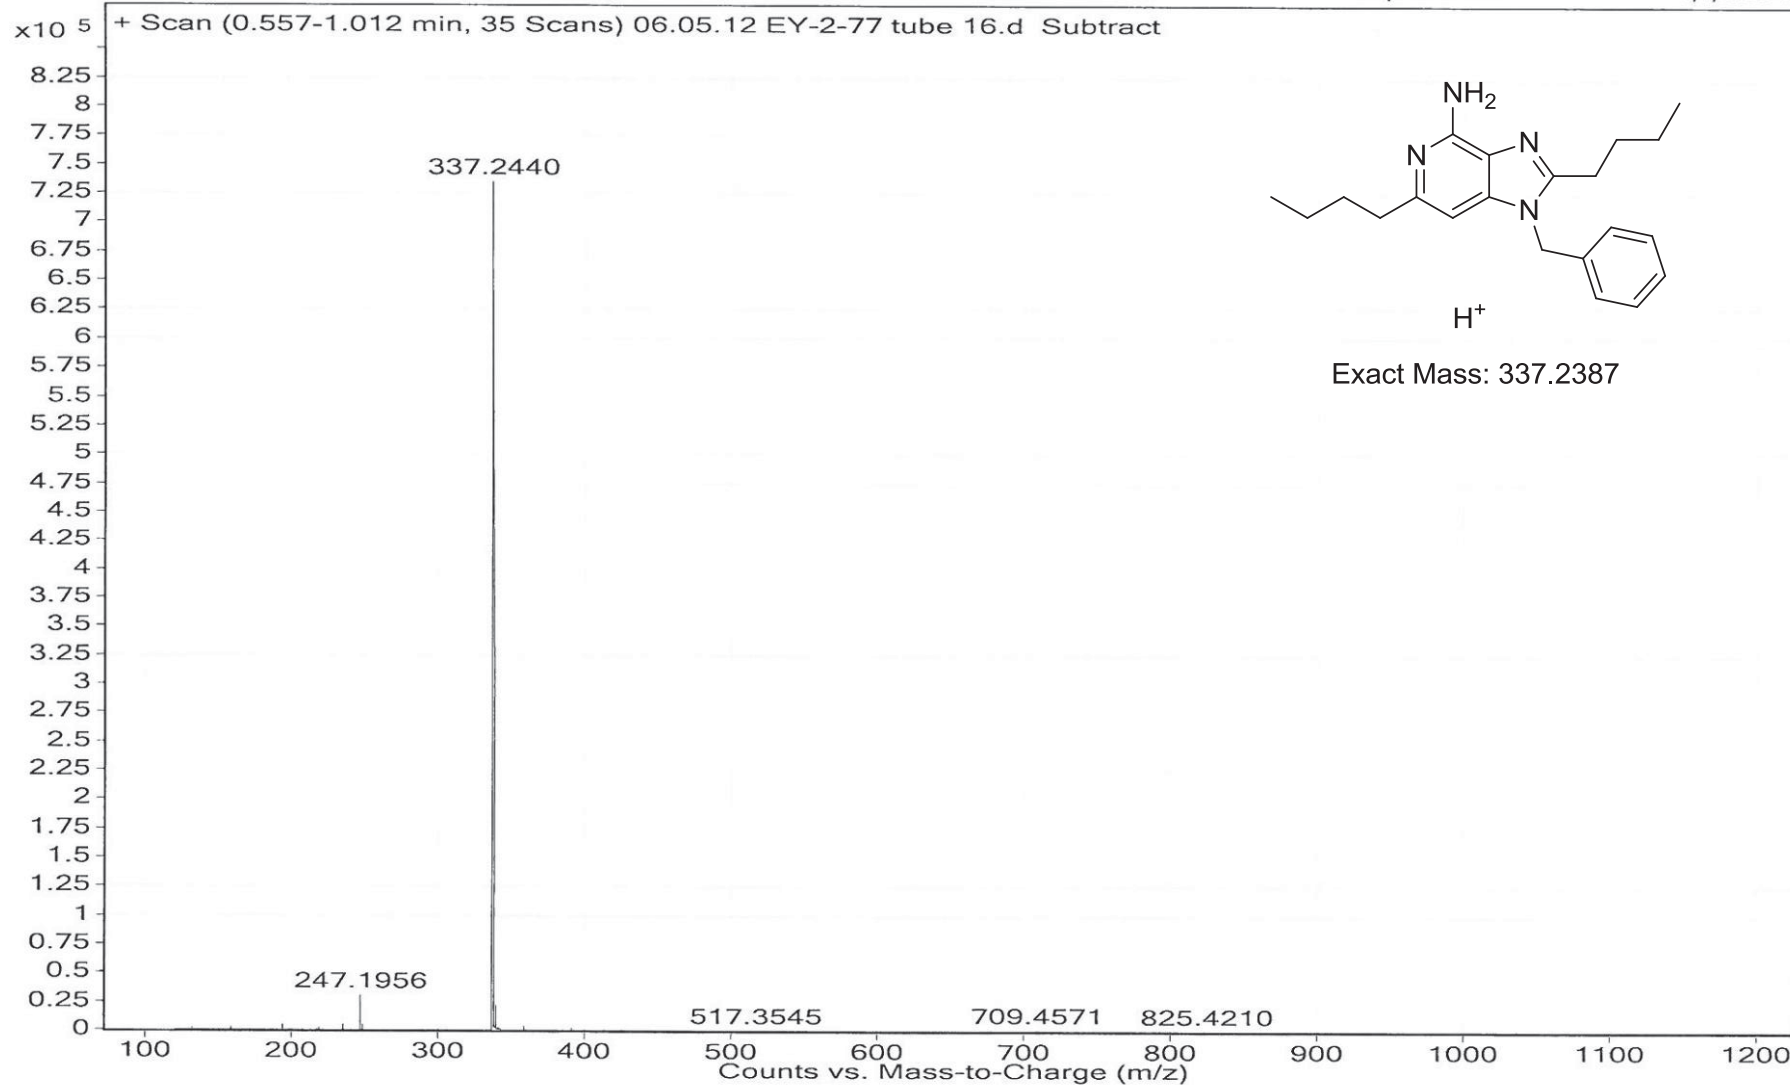

## 23a LC-MS

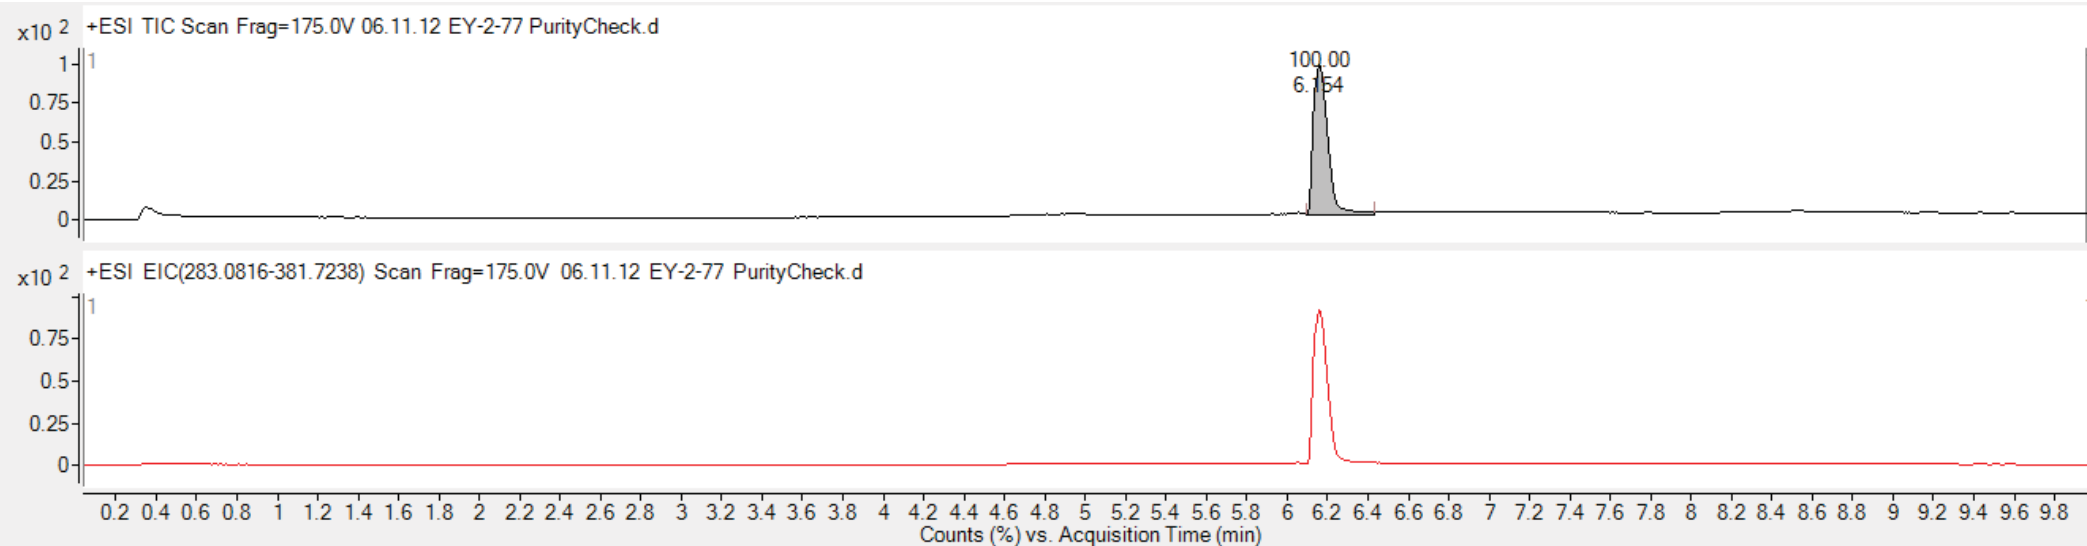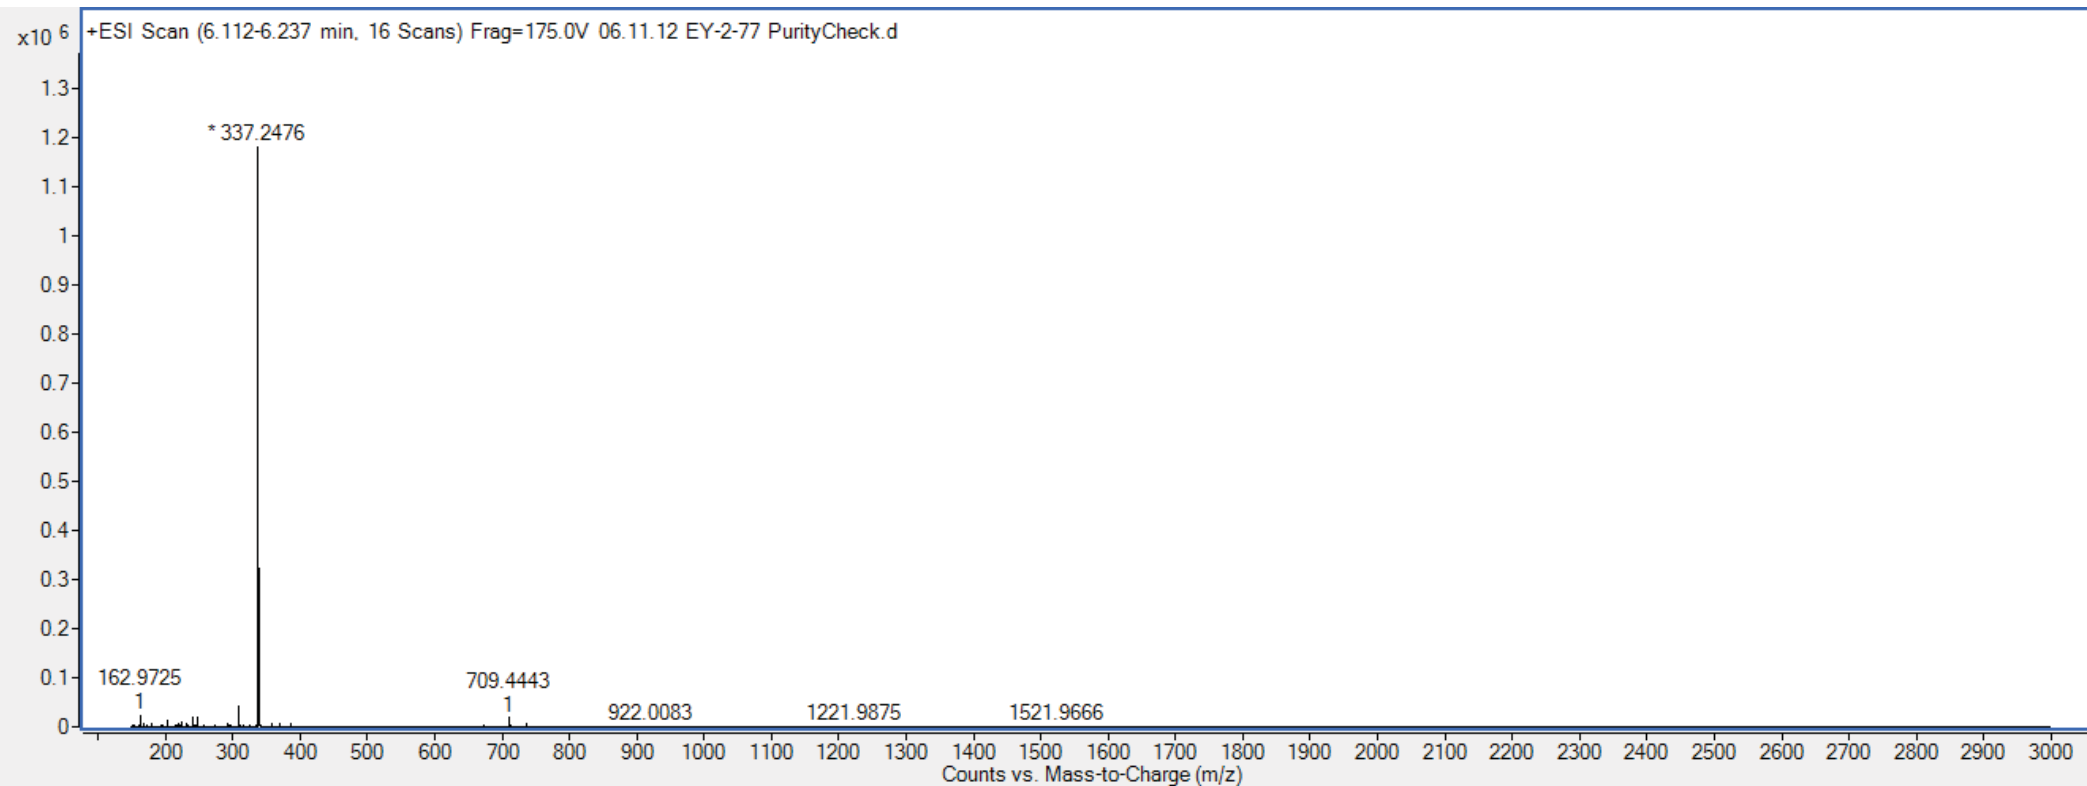

## 20b <sup>1</sup>H NMR

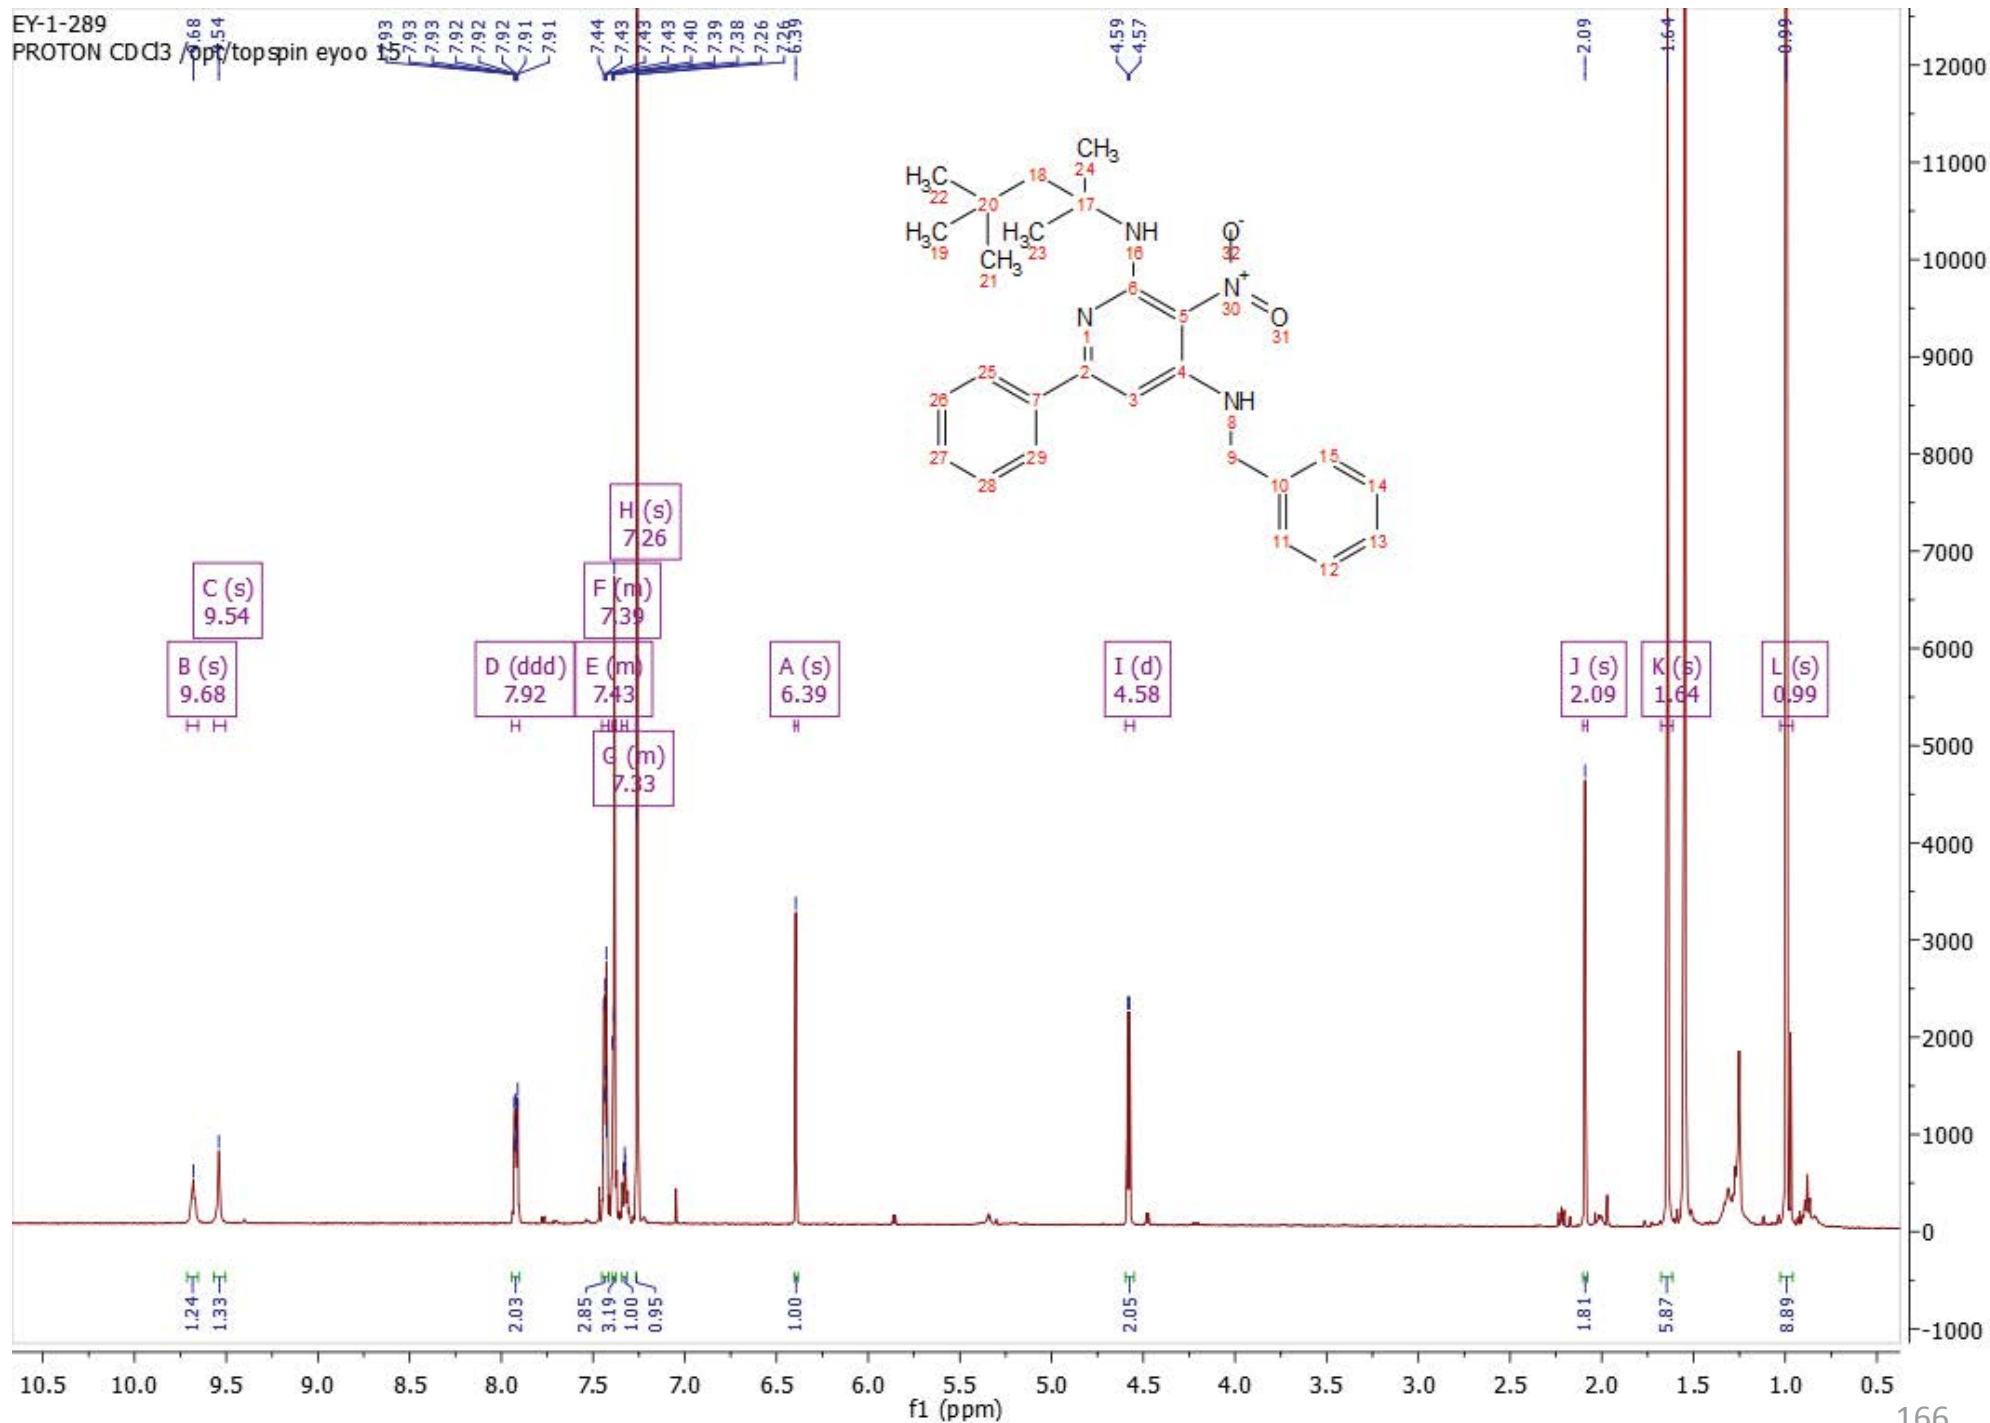



# 20b <sup>13</sup>C NMR

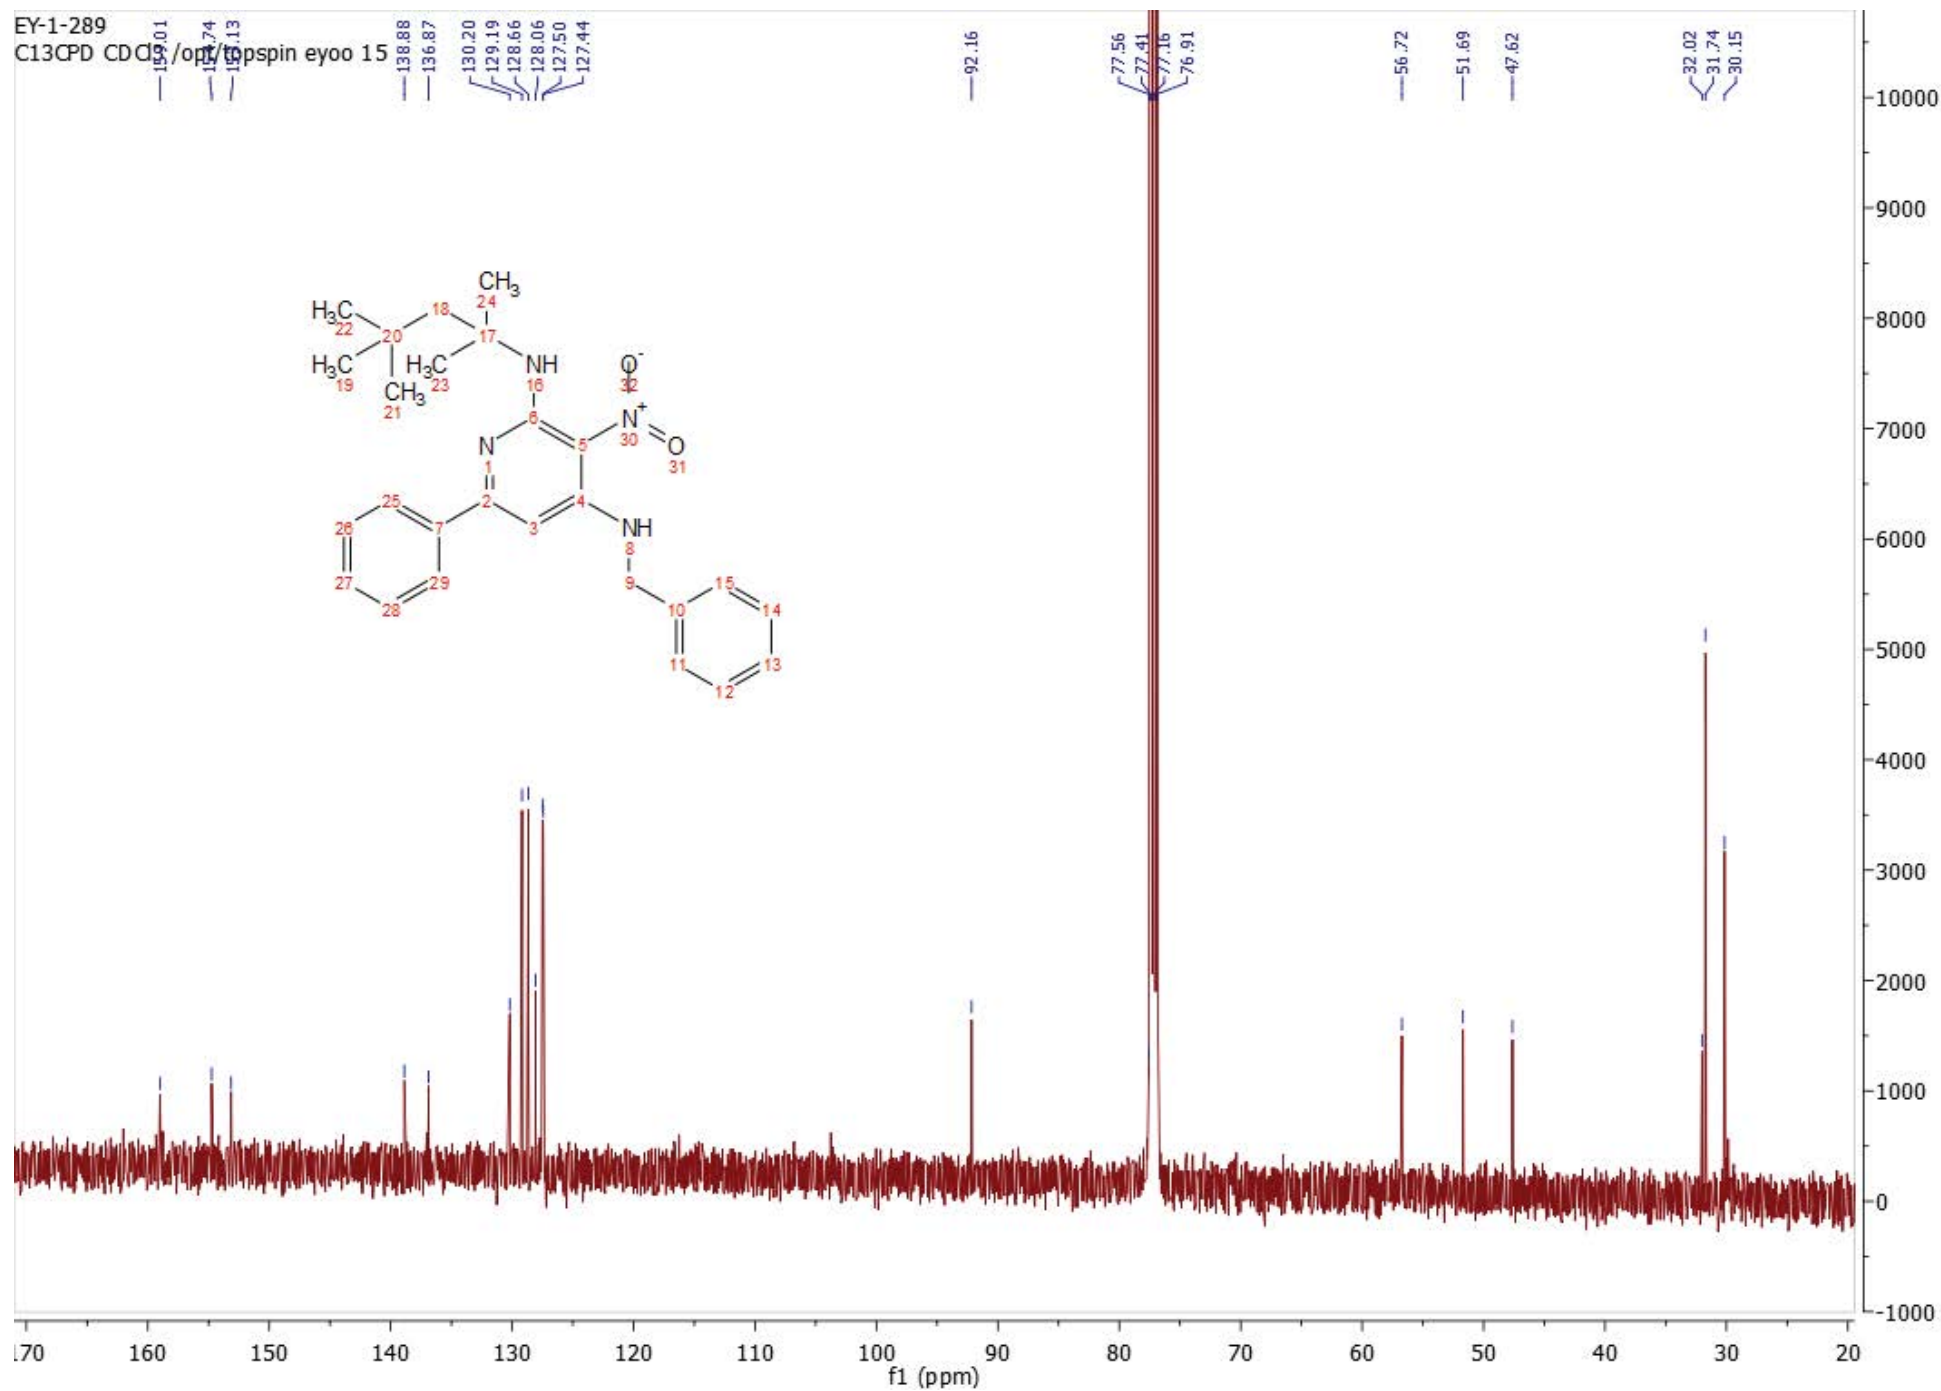

# 20b MS

|               |                      |             |                      |                 |              |                        |                       |
|---------------|----------------------|-------------|----------------------|-----------------|--------------|------------------------|-----------------------|
| Sample Name   | 04.11.12 EY-1-289 tu | Position    | Vial 1               | Instrument Name | Instrument 1 | User Name              |                       |
| Inj Vol       | -1                   | InjPosition |                      | SampleType      | Sample       | IRM Calibration Status | Success               |
| Data Filename | 04.11.12 EY-1-289 tu | ACQ Method  | Water-ACN Infusion M | Comment         |              | Acquired Time          | 4/11/2012 10:28:16 AM |

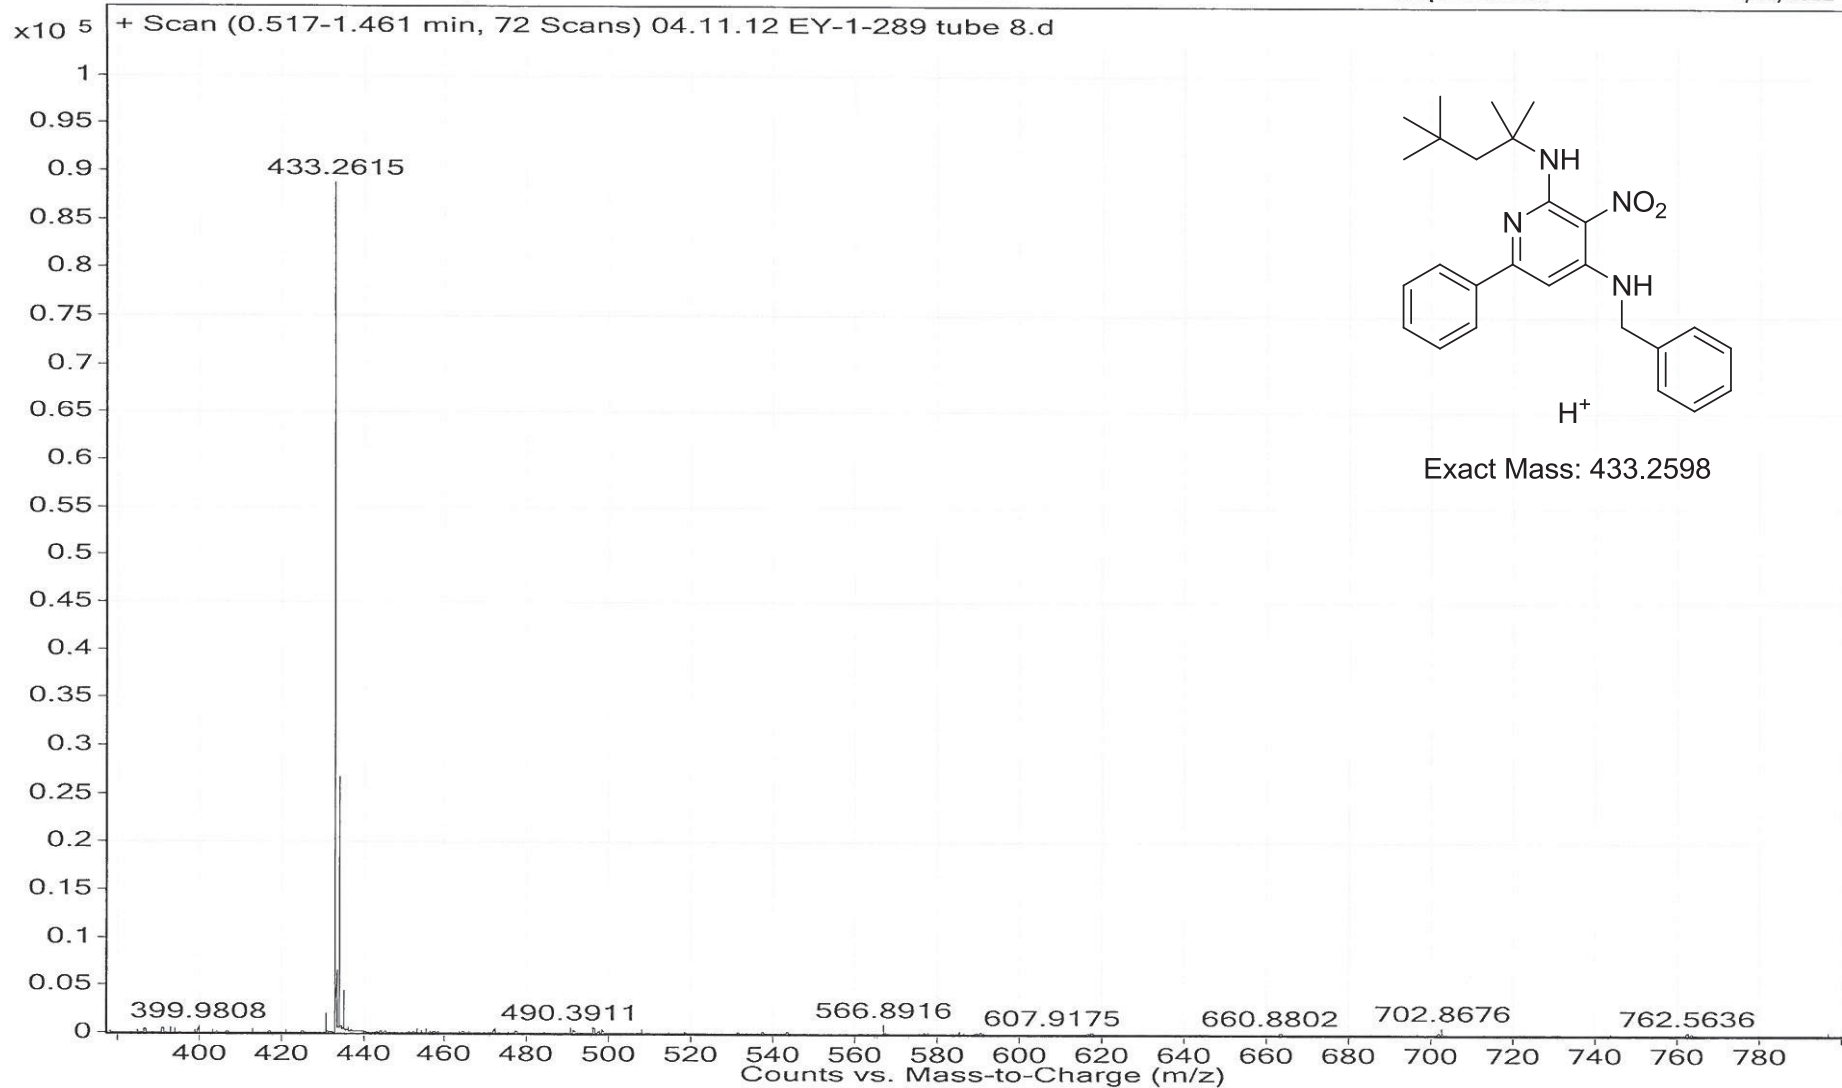

# 21b MS

|               |                      |             |                      |                 |              |                        |                      |
|---------------|----------------------|-------------|----------------------|-----------------|--------------|------------------------|----------------------|
| Sample Name   | 04.12.12 EY-1-291 tu | Position    | Vial 1               | Instrument Name | Instrument 1 | User Name              |                      |
| Inj Vol       | -1                   | InjPosition |                      | SampleType      | Sample       | IRM Calibration Status | Success              |
| Data Filename | 04.12.12 EY-1-291 tu | ACQ Method  | Water-ACN Infusion M | Comment         |              | Acquired Time          | 4/12/2012 2:19:57 PM |

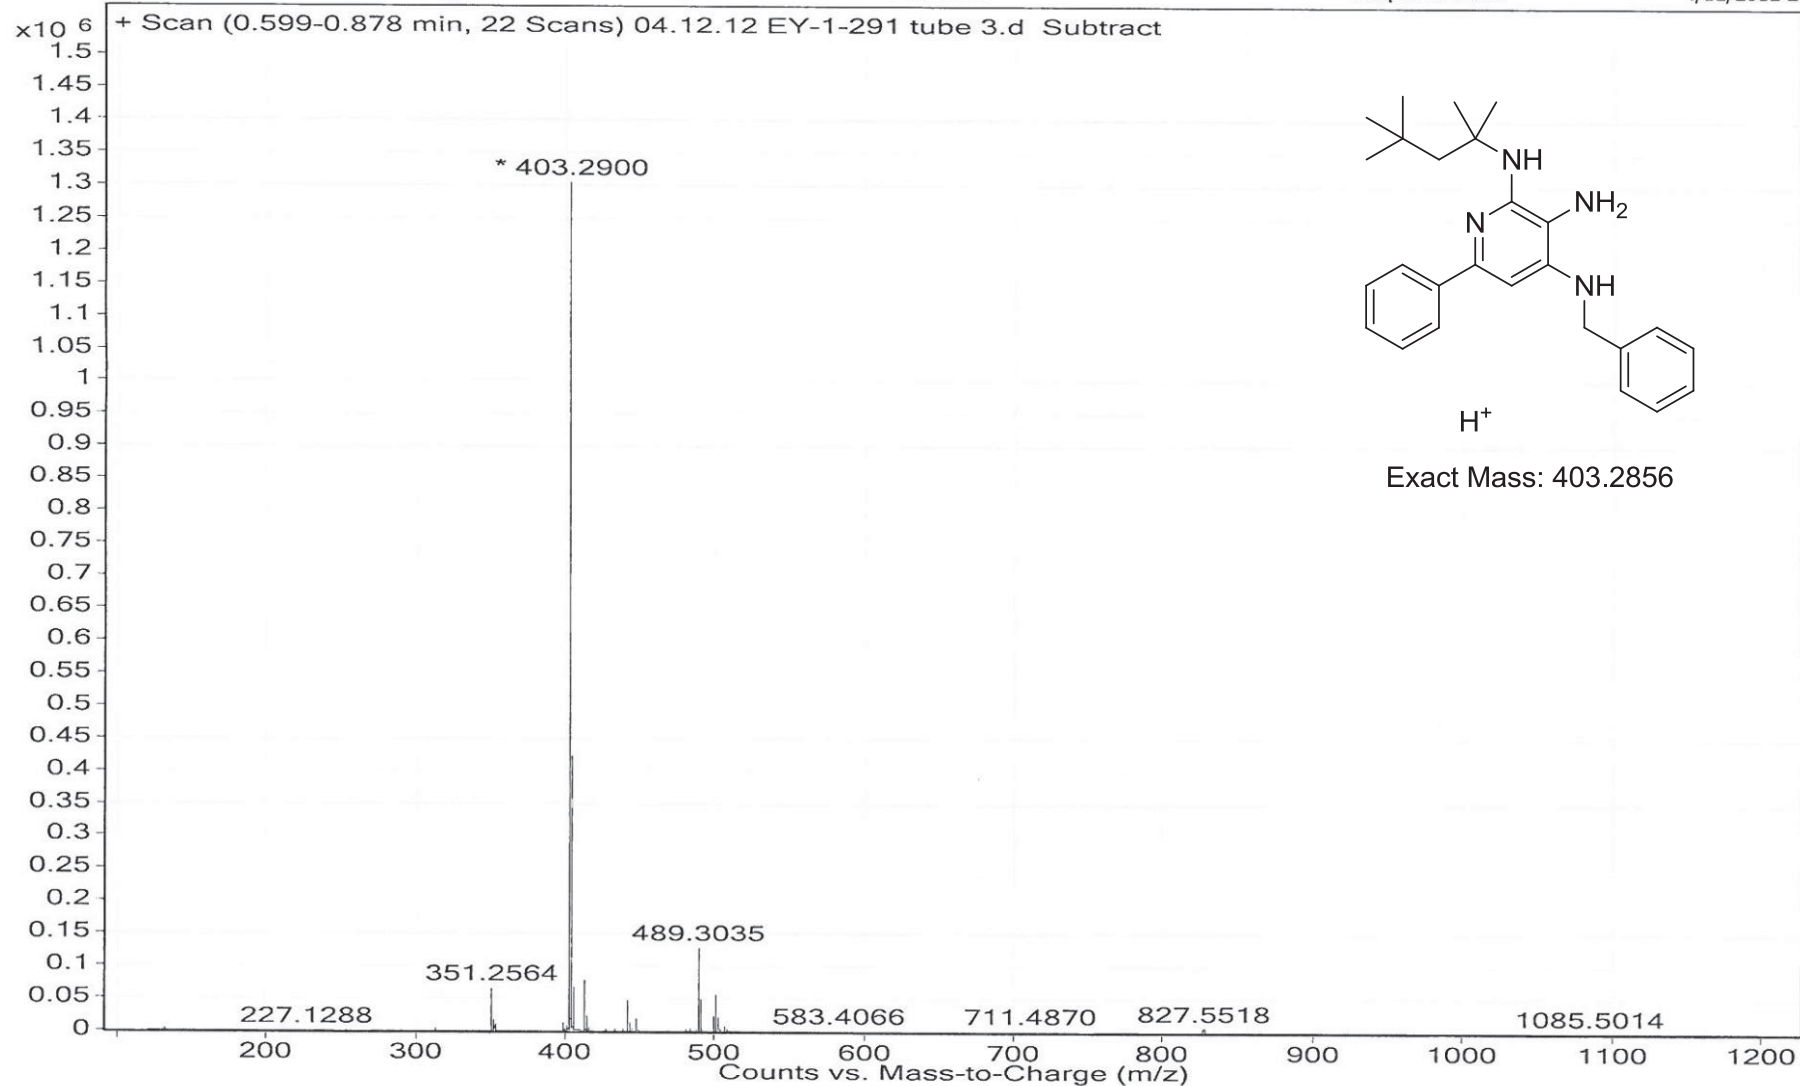

# 22b <sup>1</sup>H NMR

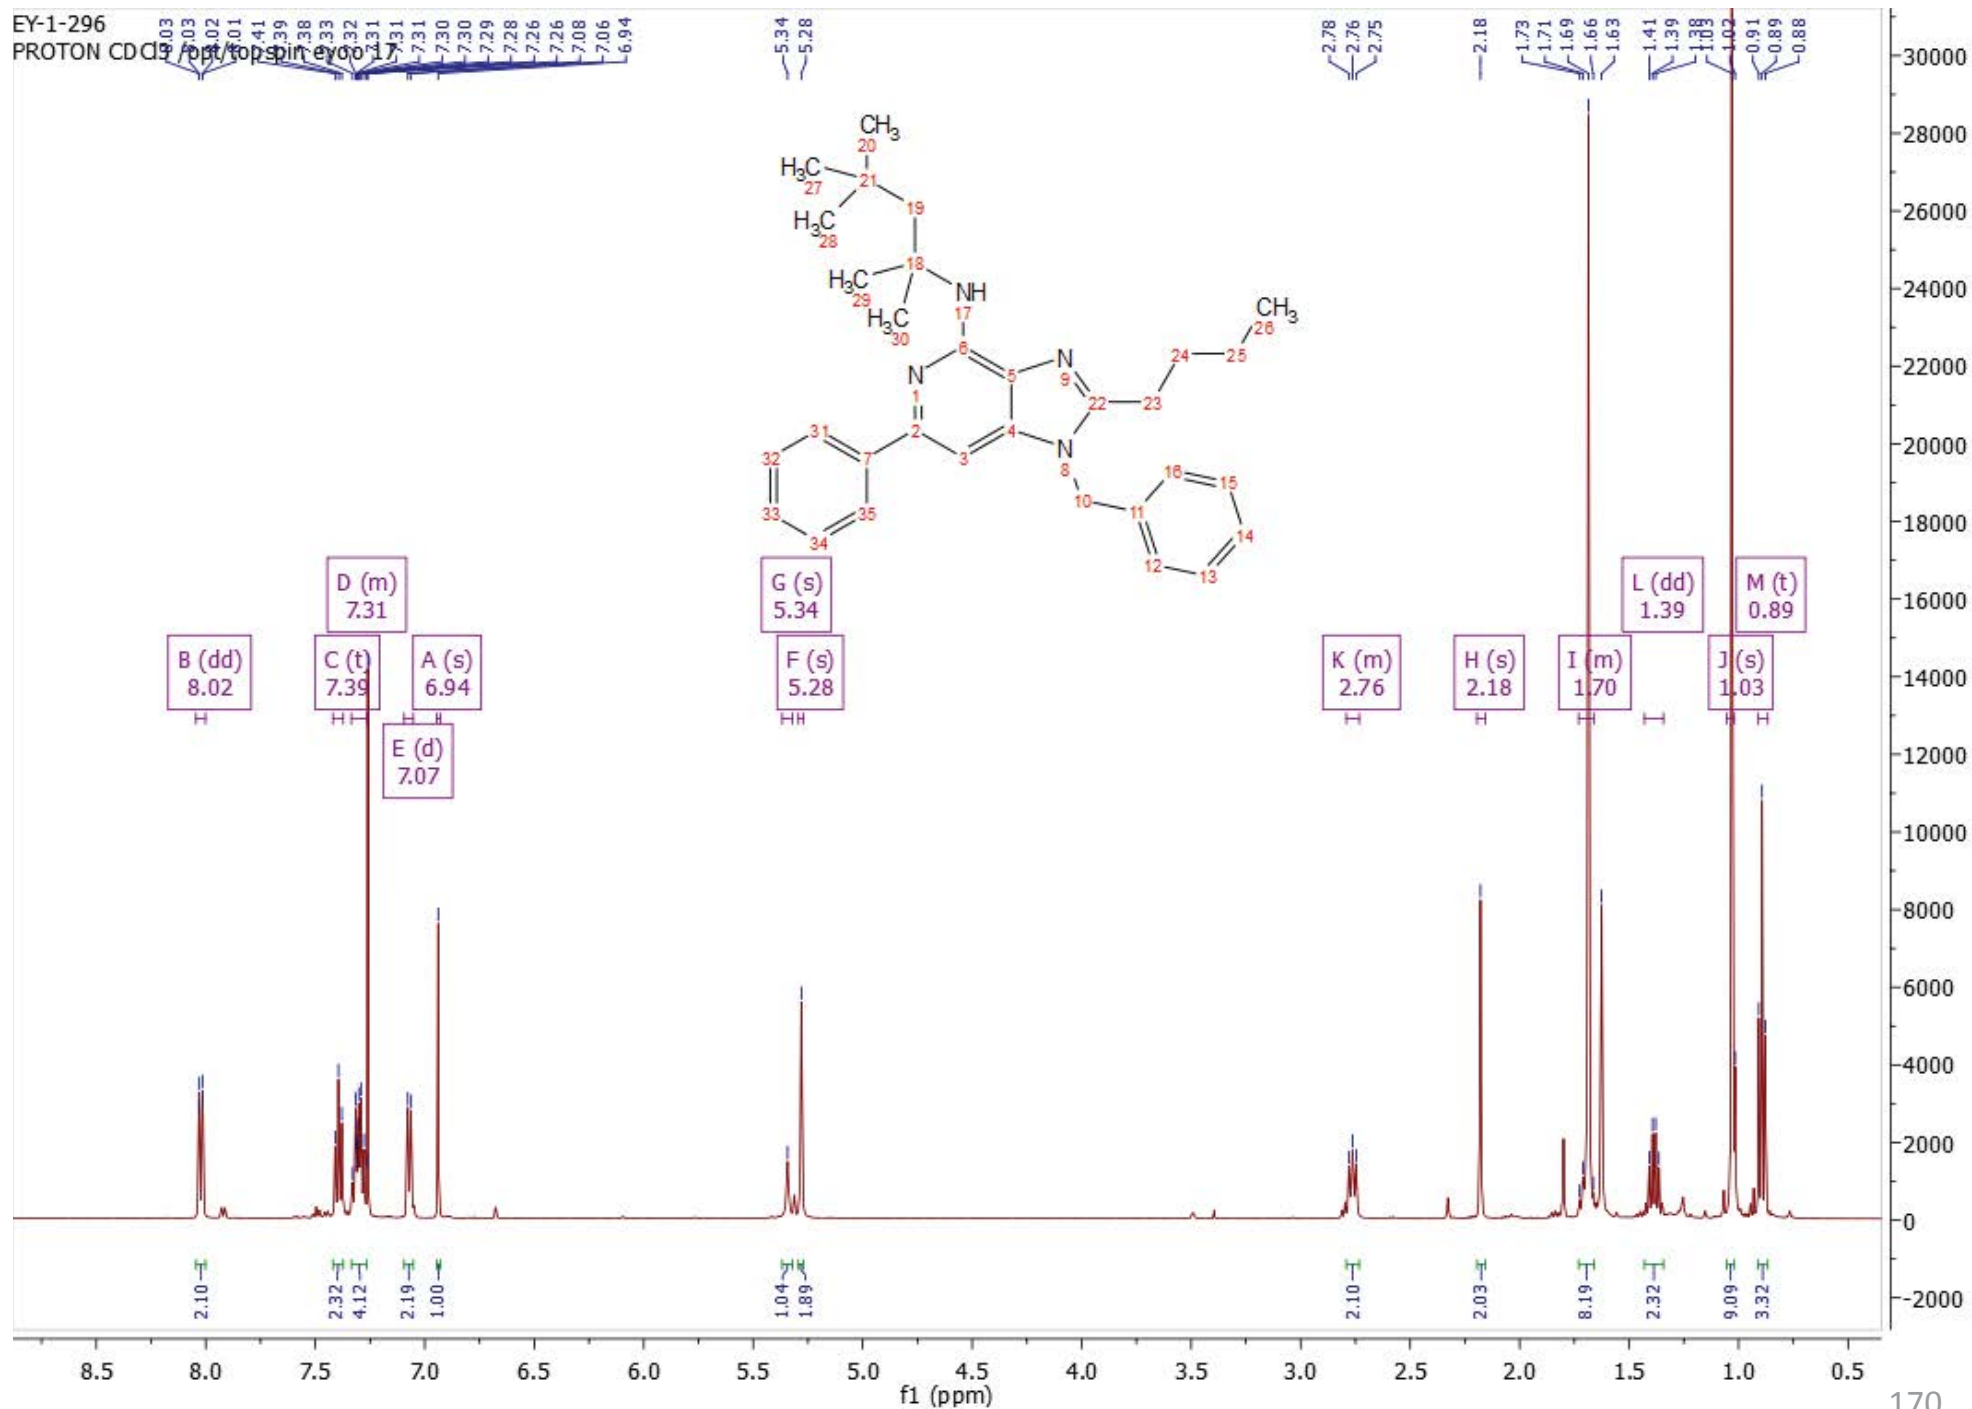

# 22b <sup>13</sup>C NMR

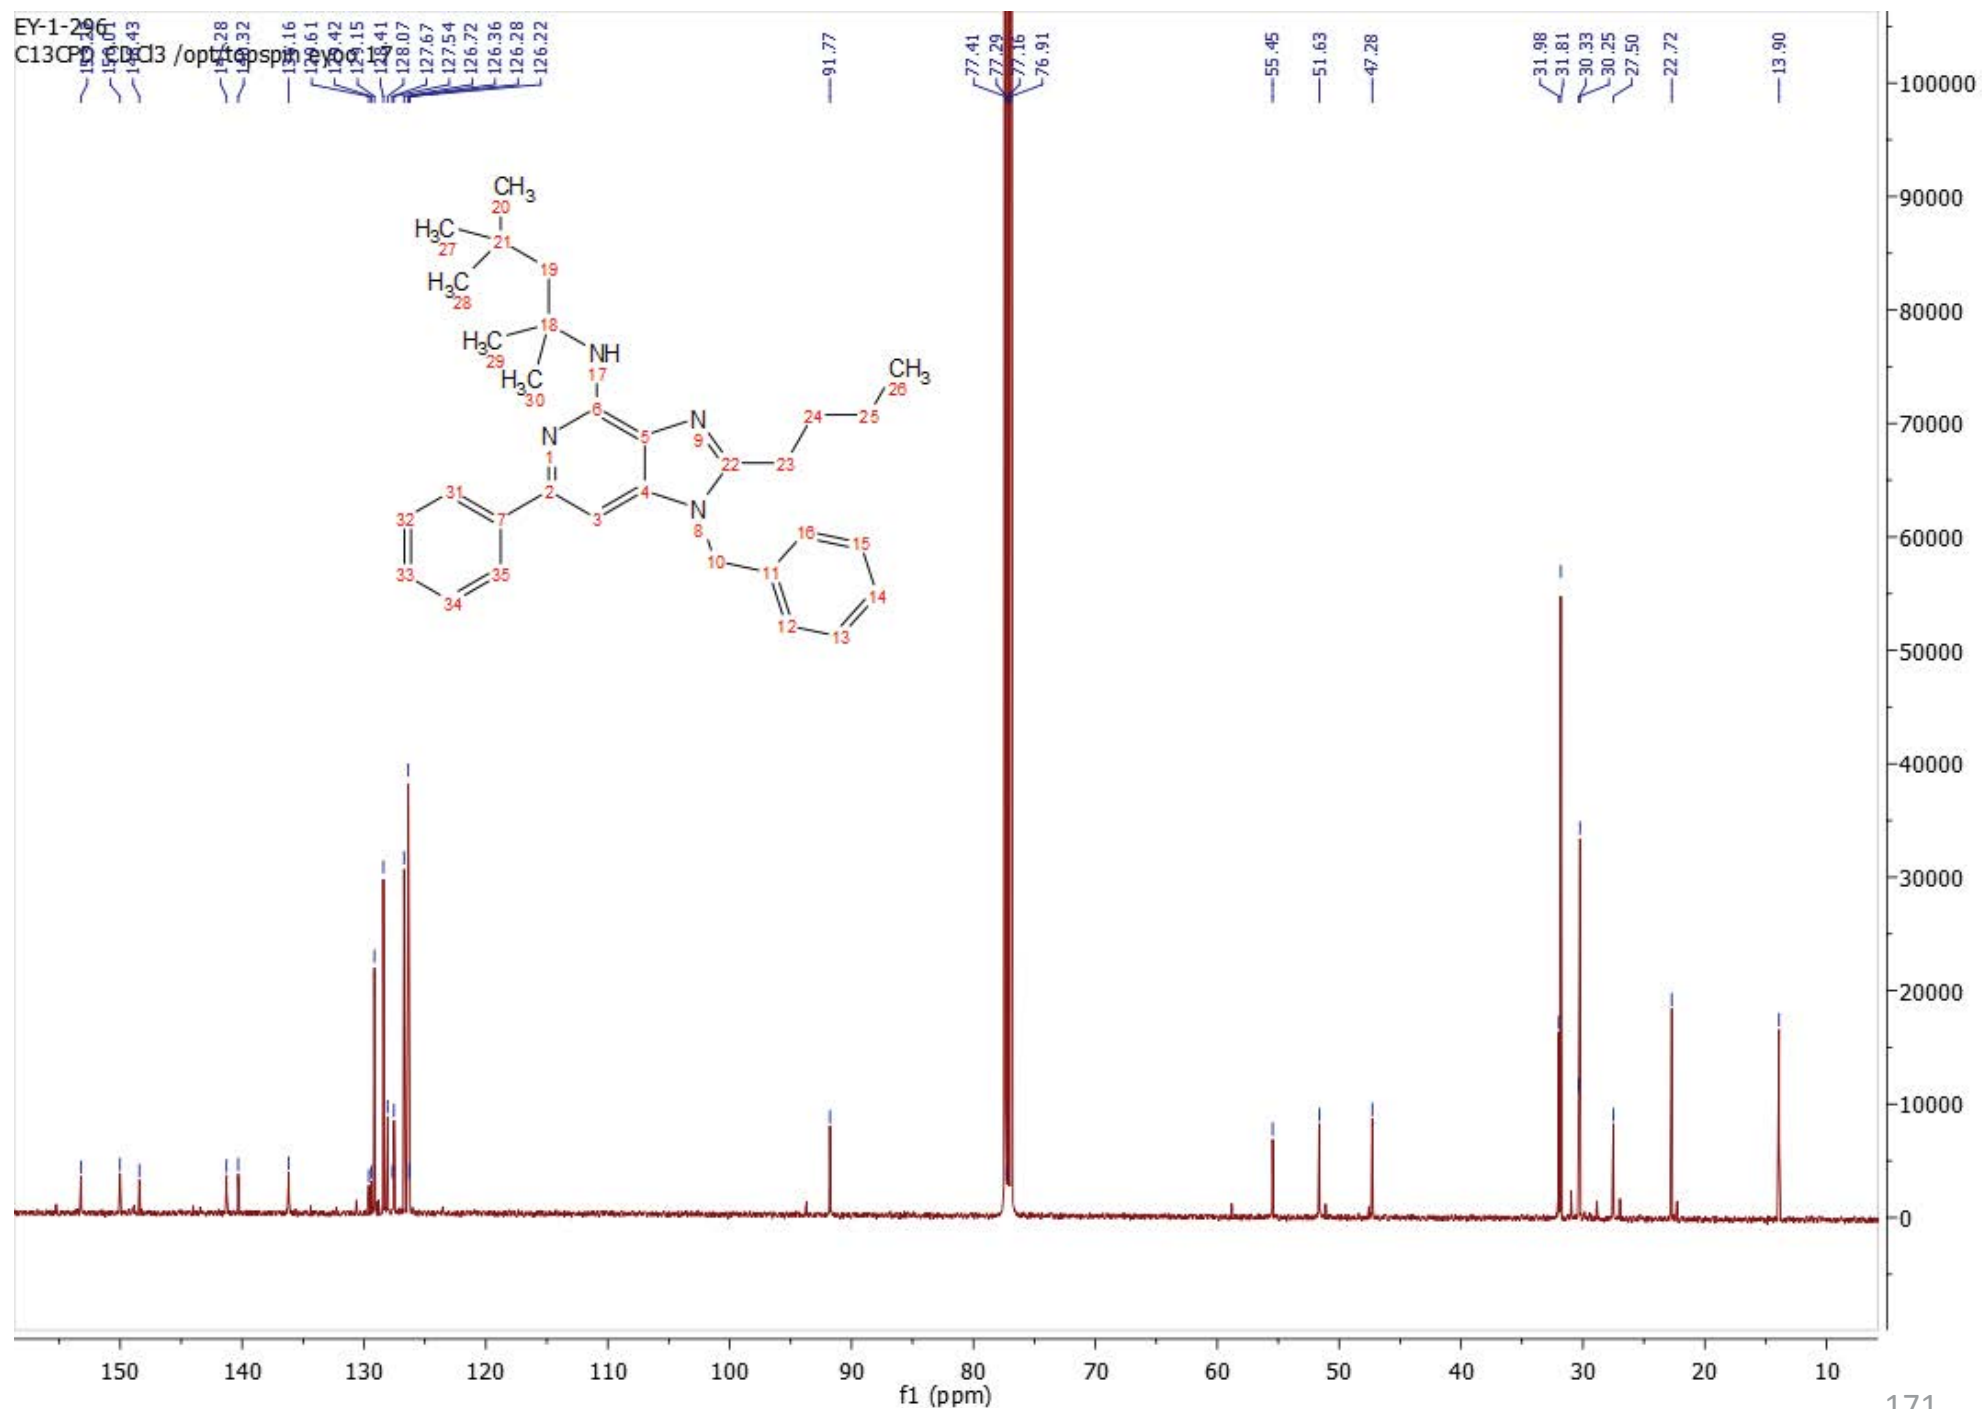

# 22b MS

|               |                      |             |                      |                 |              |                        |                   |
|---------------|----------------------|-------------|----------------------|-----------------|--------------|------------------------|-------------------|
| Sample Name   | 04.18.12 EY-1-296-2  | Position    | Vial 1               | Instrument Name | Instrument 1 | User Name              |                   |
| Inj Vol       | -1                   | InjPosition |                      | SampleType      | Sample       | IRM Calibration Status | Success           |
| Data Filename | 04.18.12 EY-1-296-2. | ACQ Method  | Water-ACN Infusion M | Comment         |              | Acquired Time          | 4/18/2012 4:42:34 |

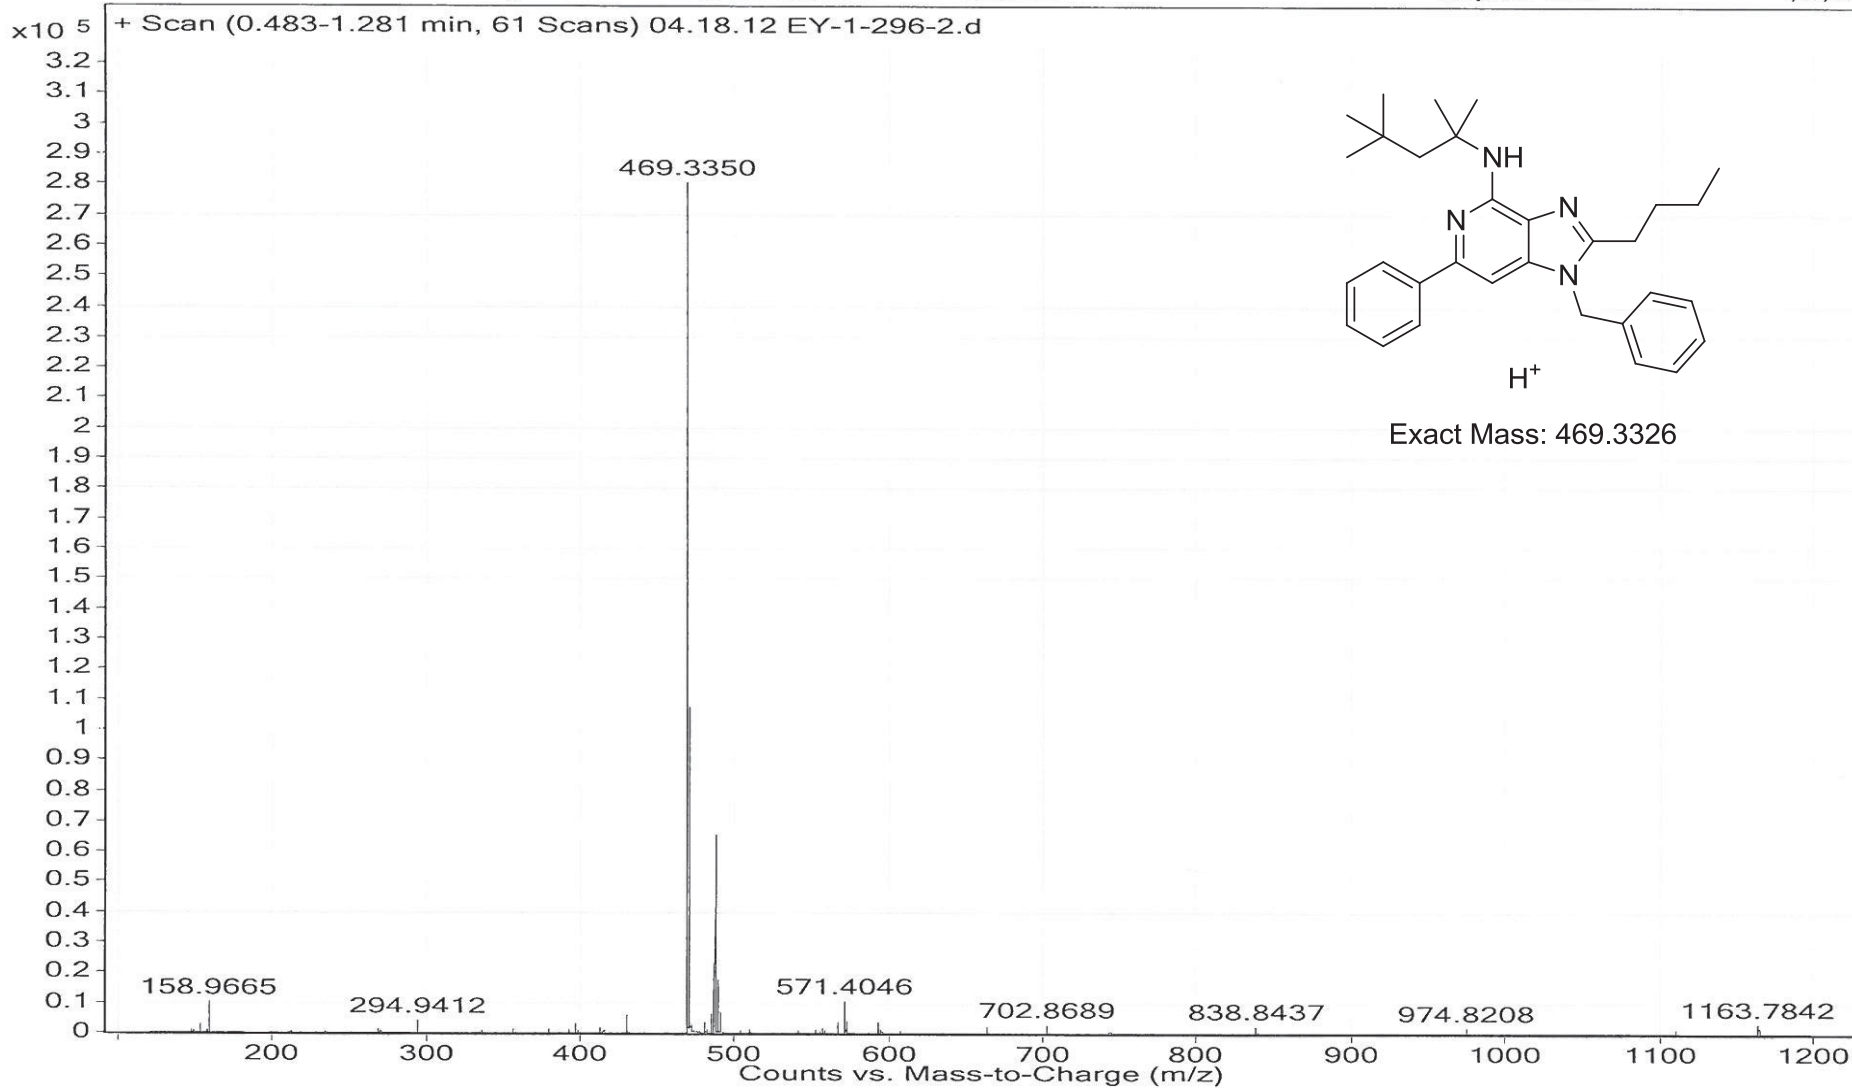



# 23b <sup>1</sup>H NMR

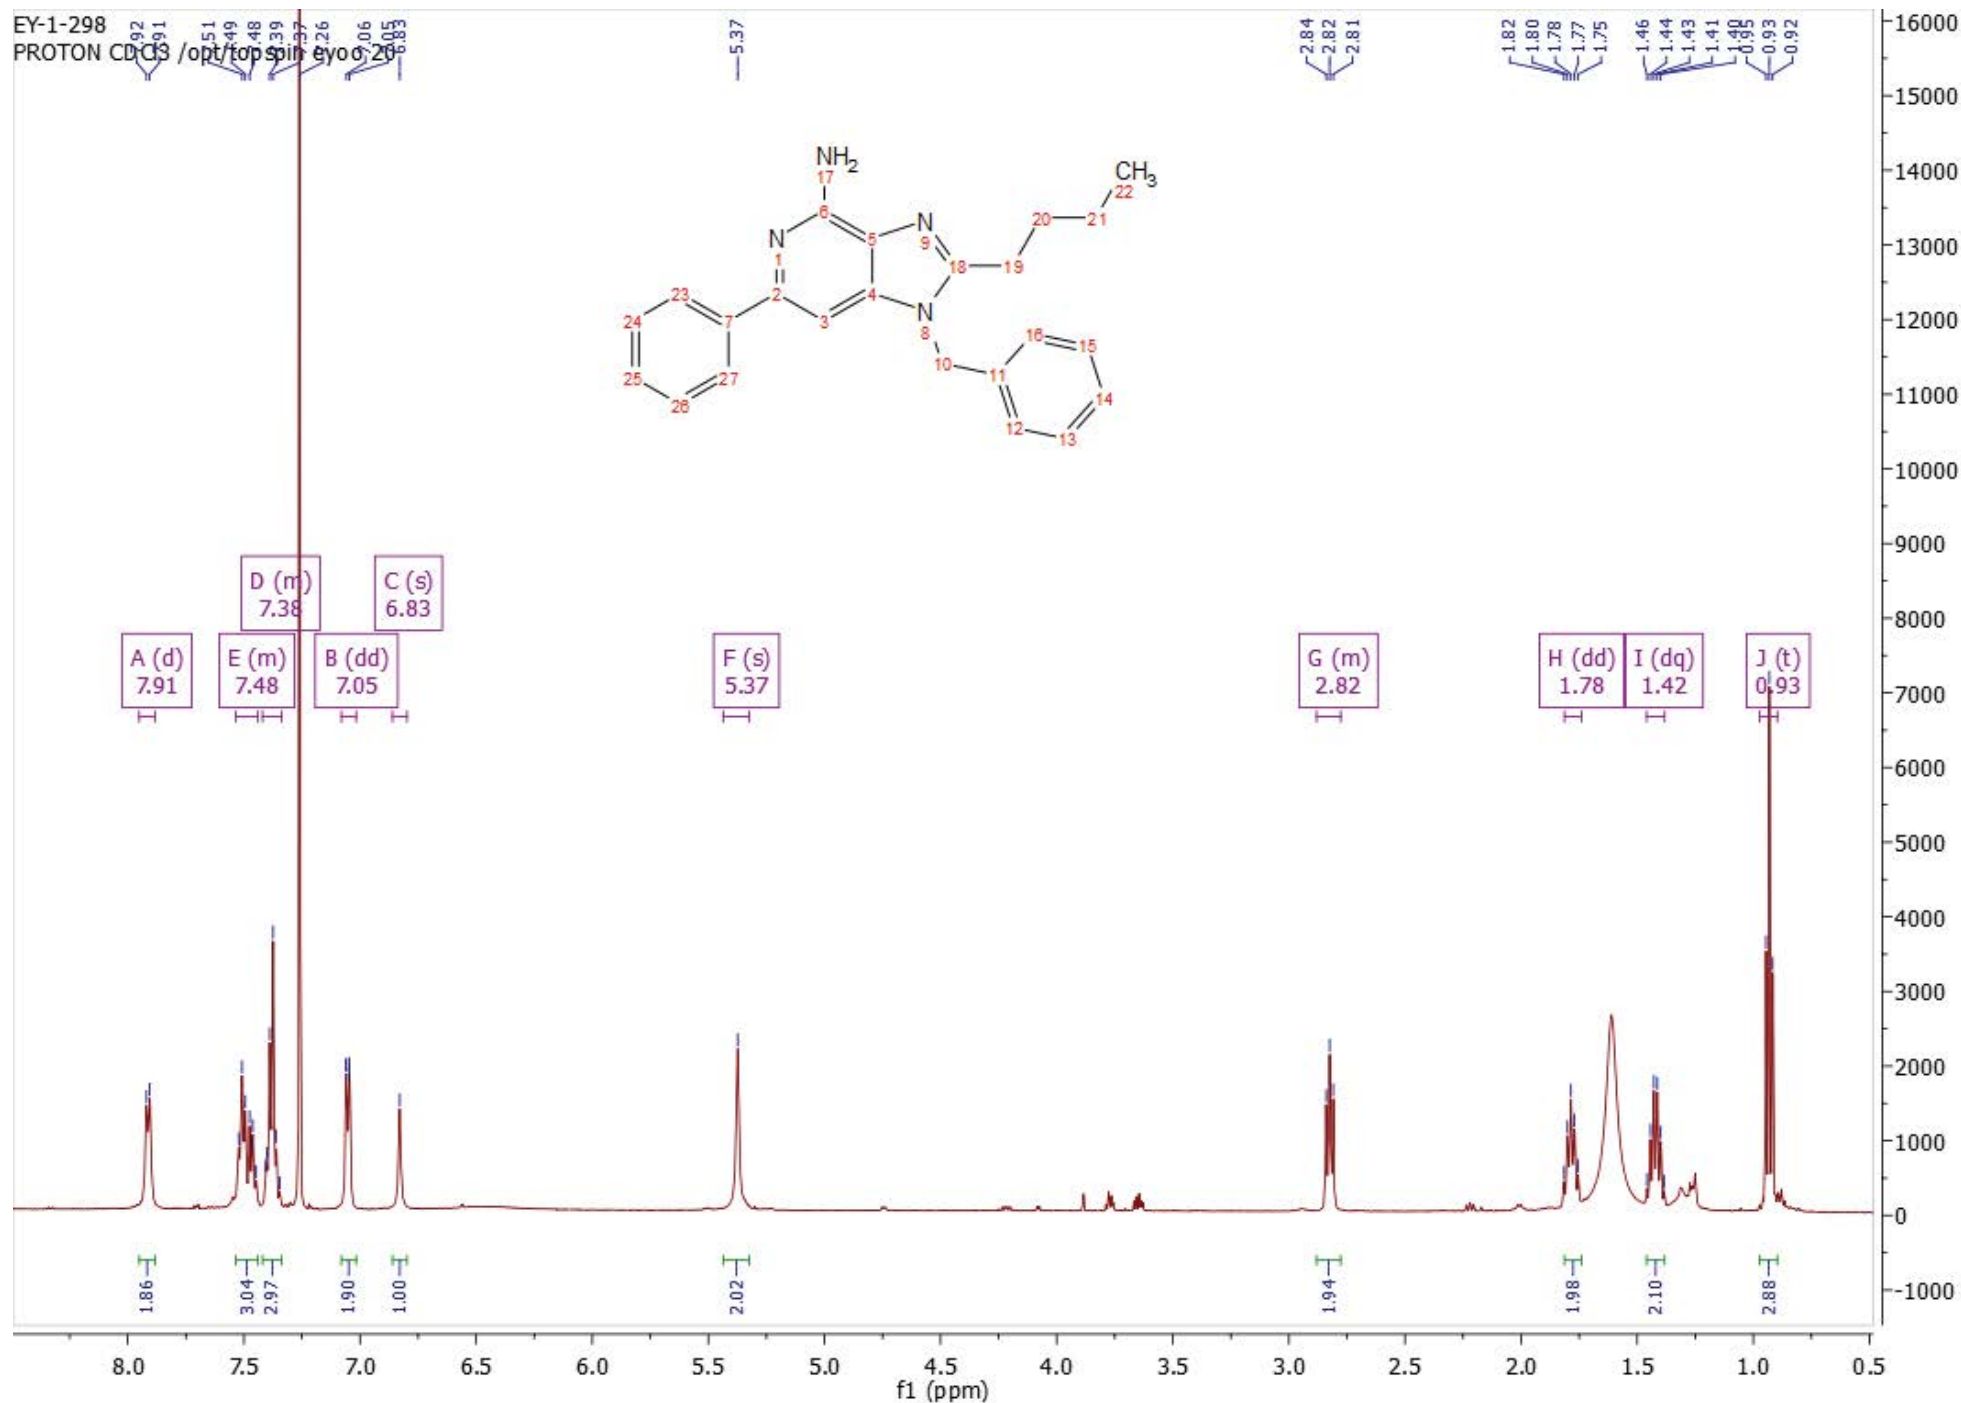



# 23b <sup>13</sup>C NMR

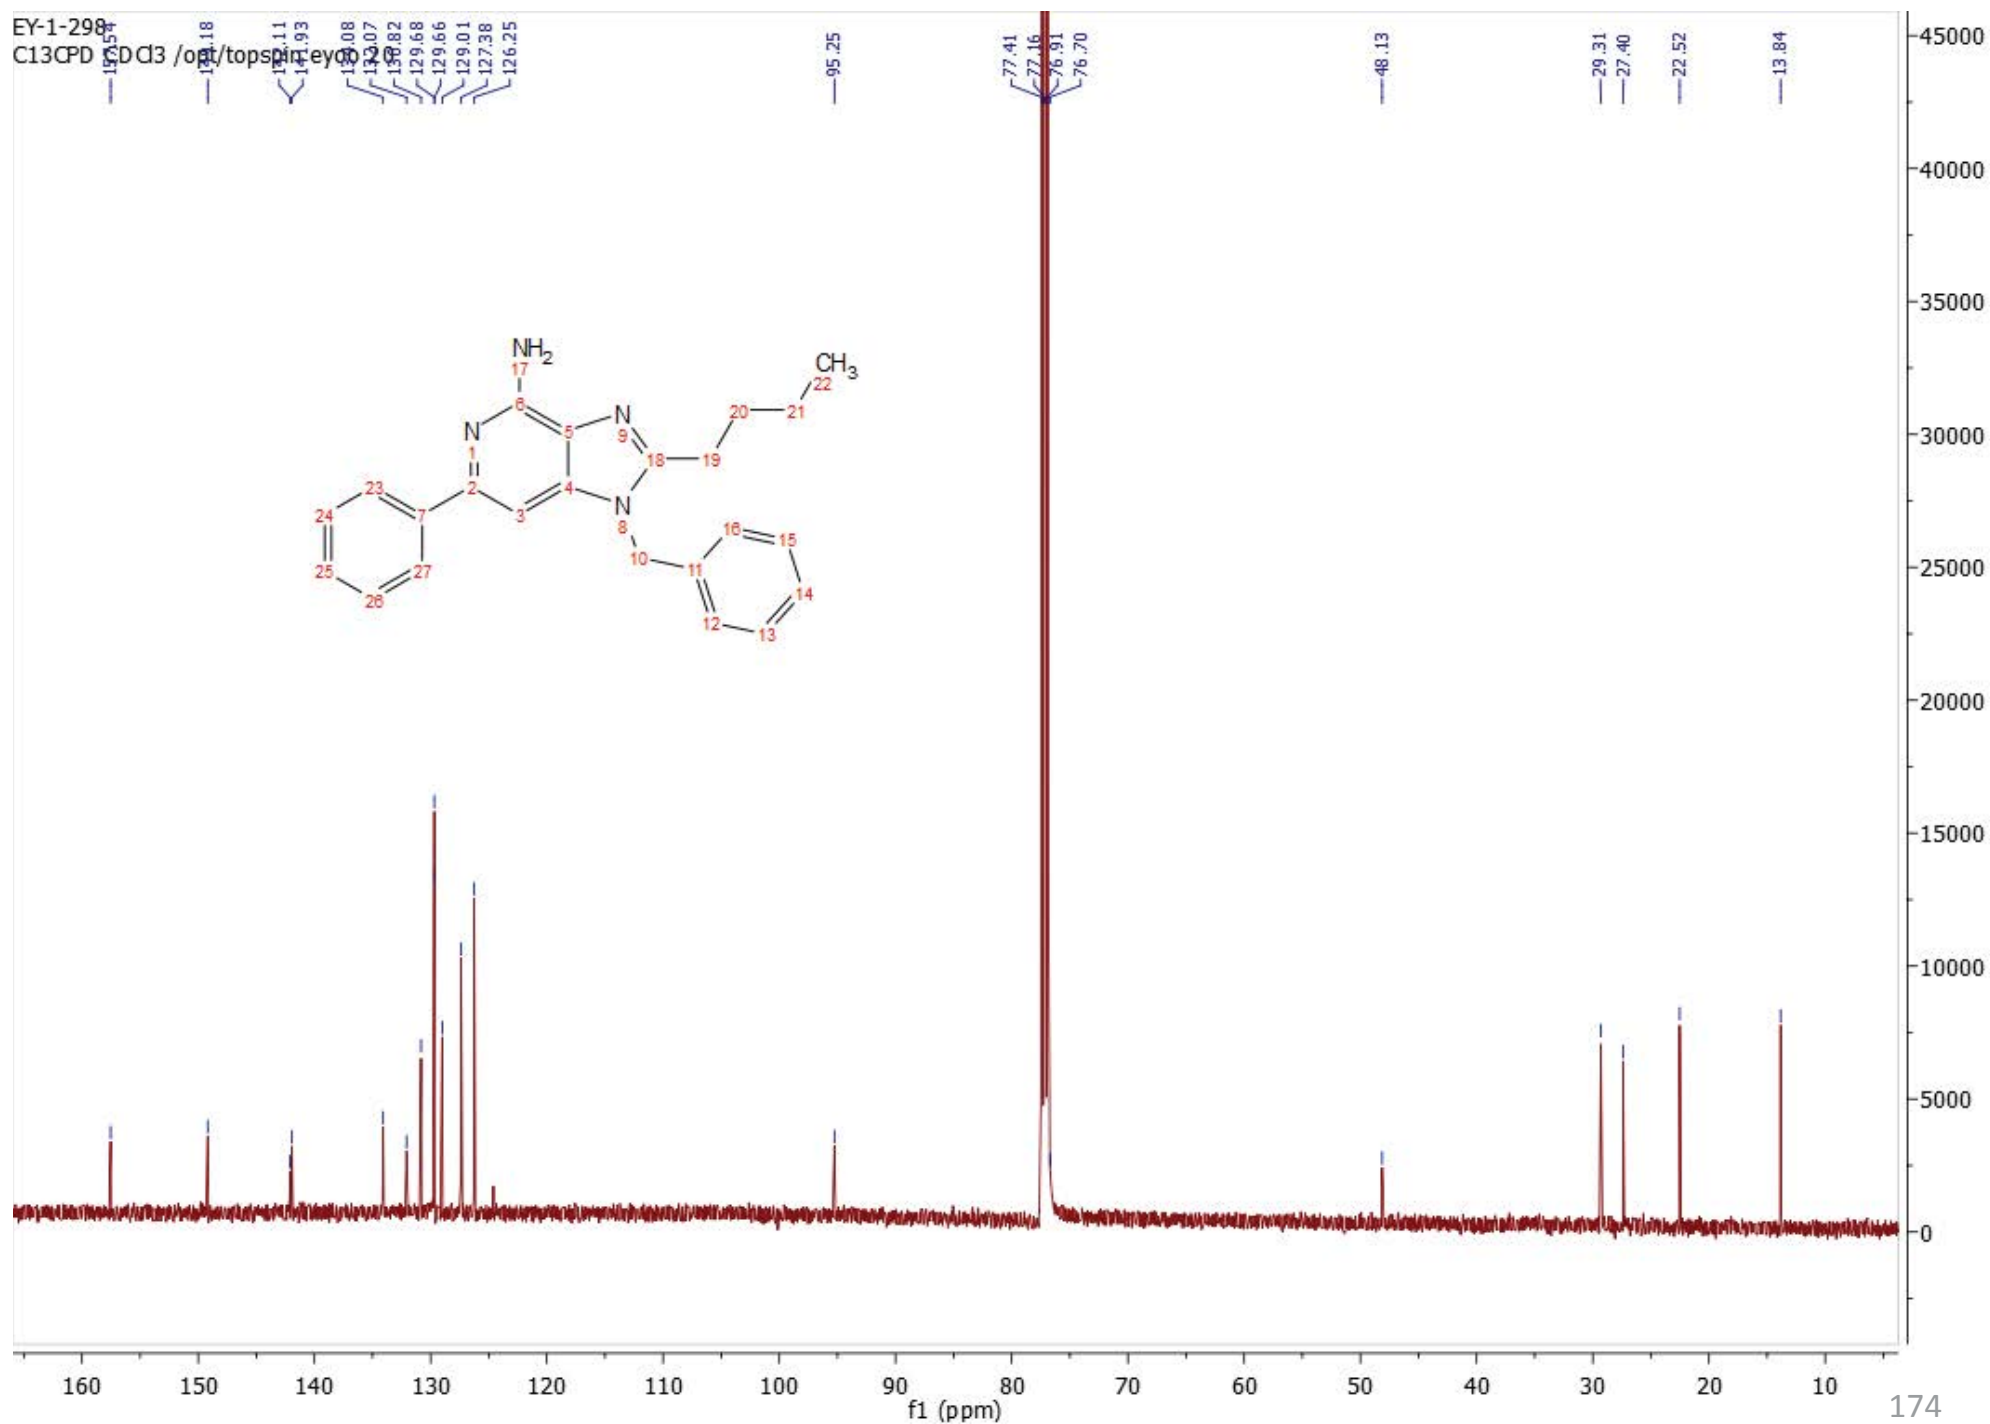

# 23b MS

|               |                     |             |                      |                 |              |                        |                      |
|---------------|---------------------|-------------|----------------------|-----------------|--------------|------------------------|----------------------|
| Sample Name   | 04.19.12 EY-1-298   | Position    | Vial 1               | Instrument Name | Instrument 1 | User Name              |                      |
| Inj Vol       | -1                  | InjPosition |                      | SampleType      | Sample       | IRM Calibration Status | Success              |
| Data Filename | 04.19.12 EY-1-298.d | ACQ Method  | Water-ACN Infusion M | Comment         |              | Acquired Time          | 4/19/2012 2:26:47 PM |

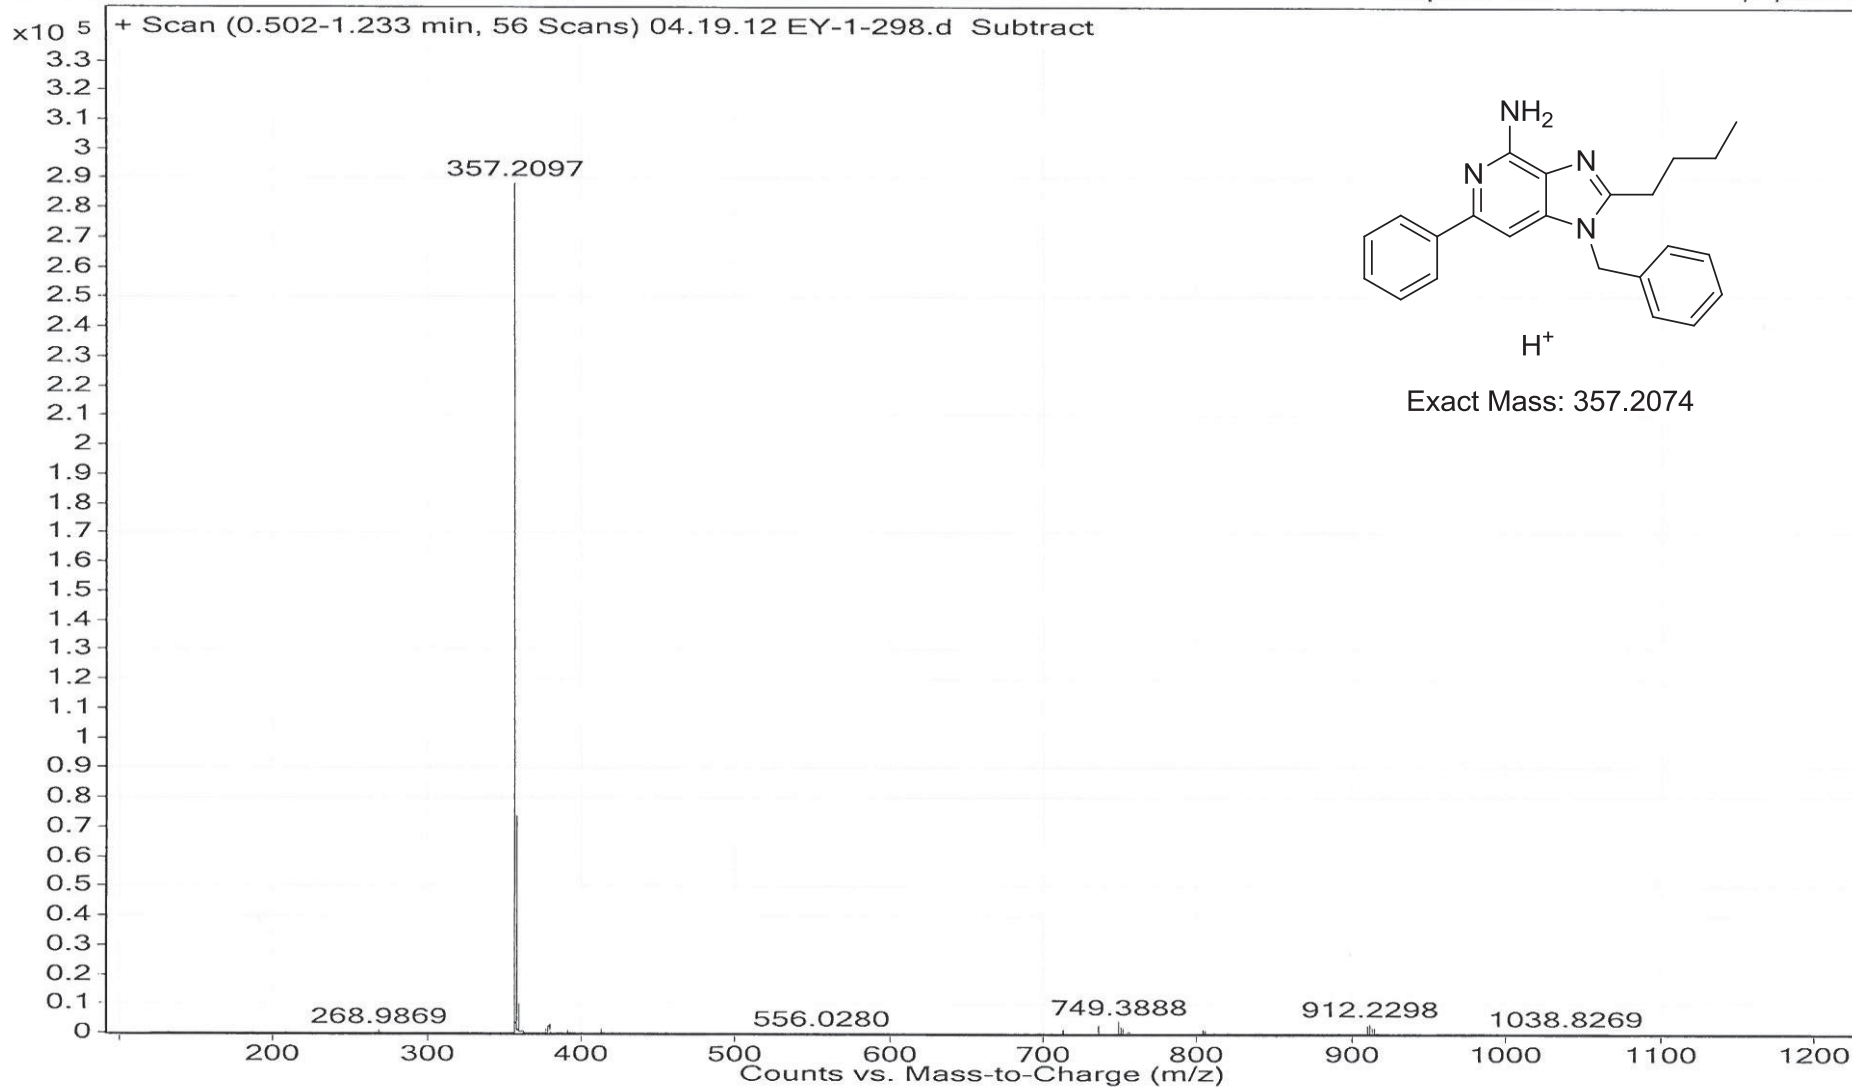

## 23b LC-MS

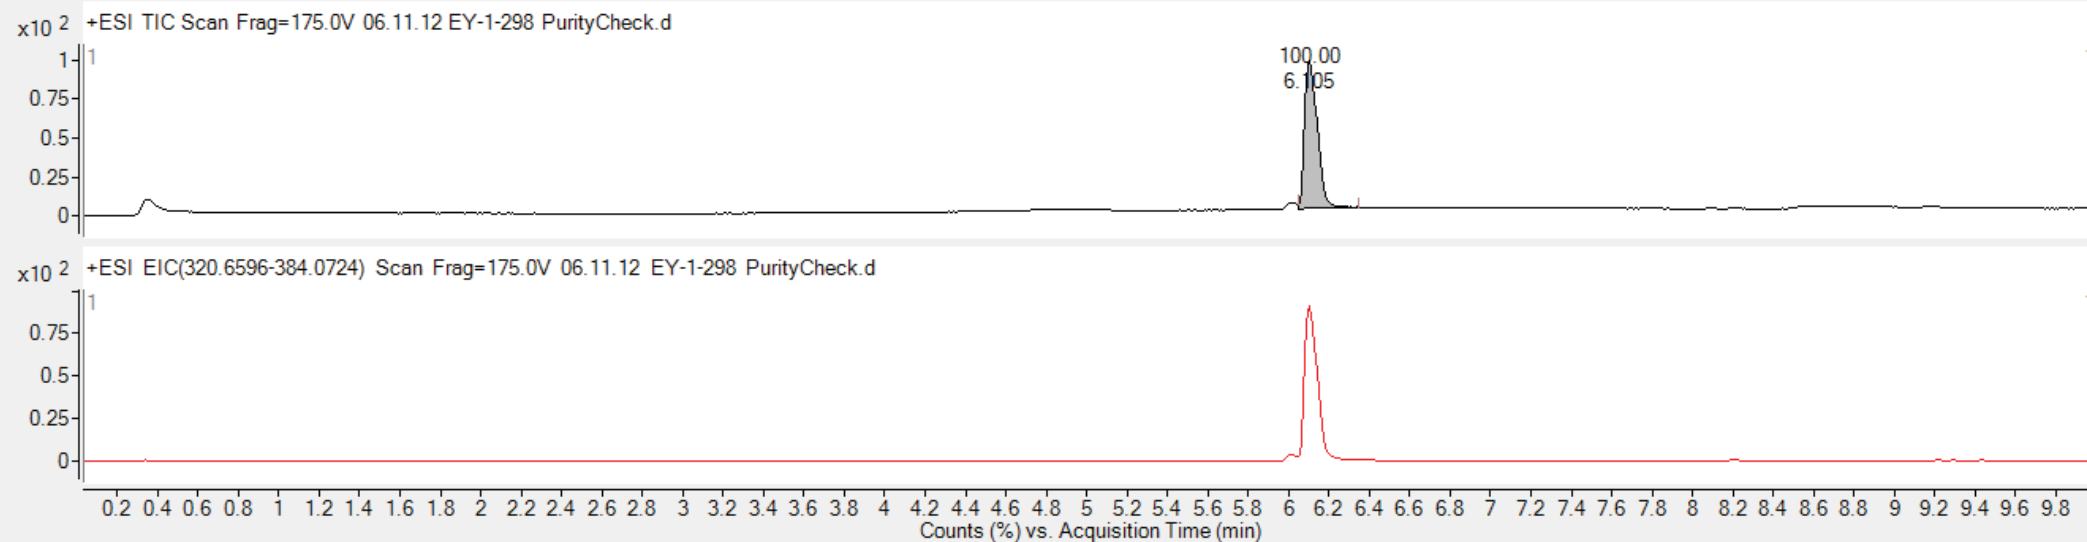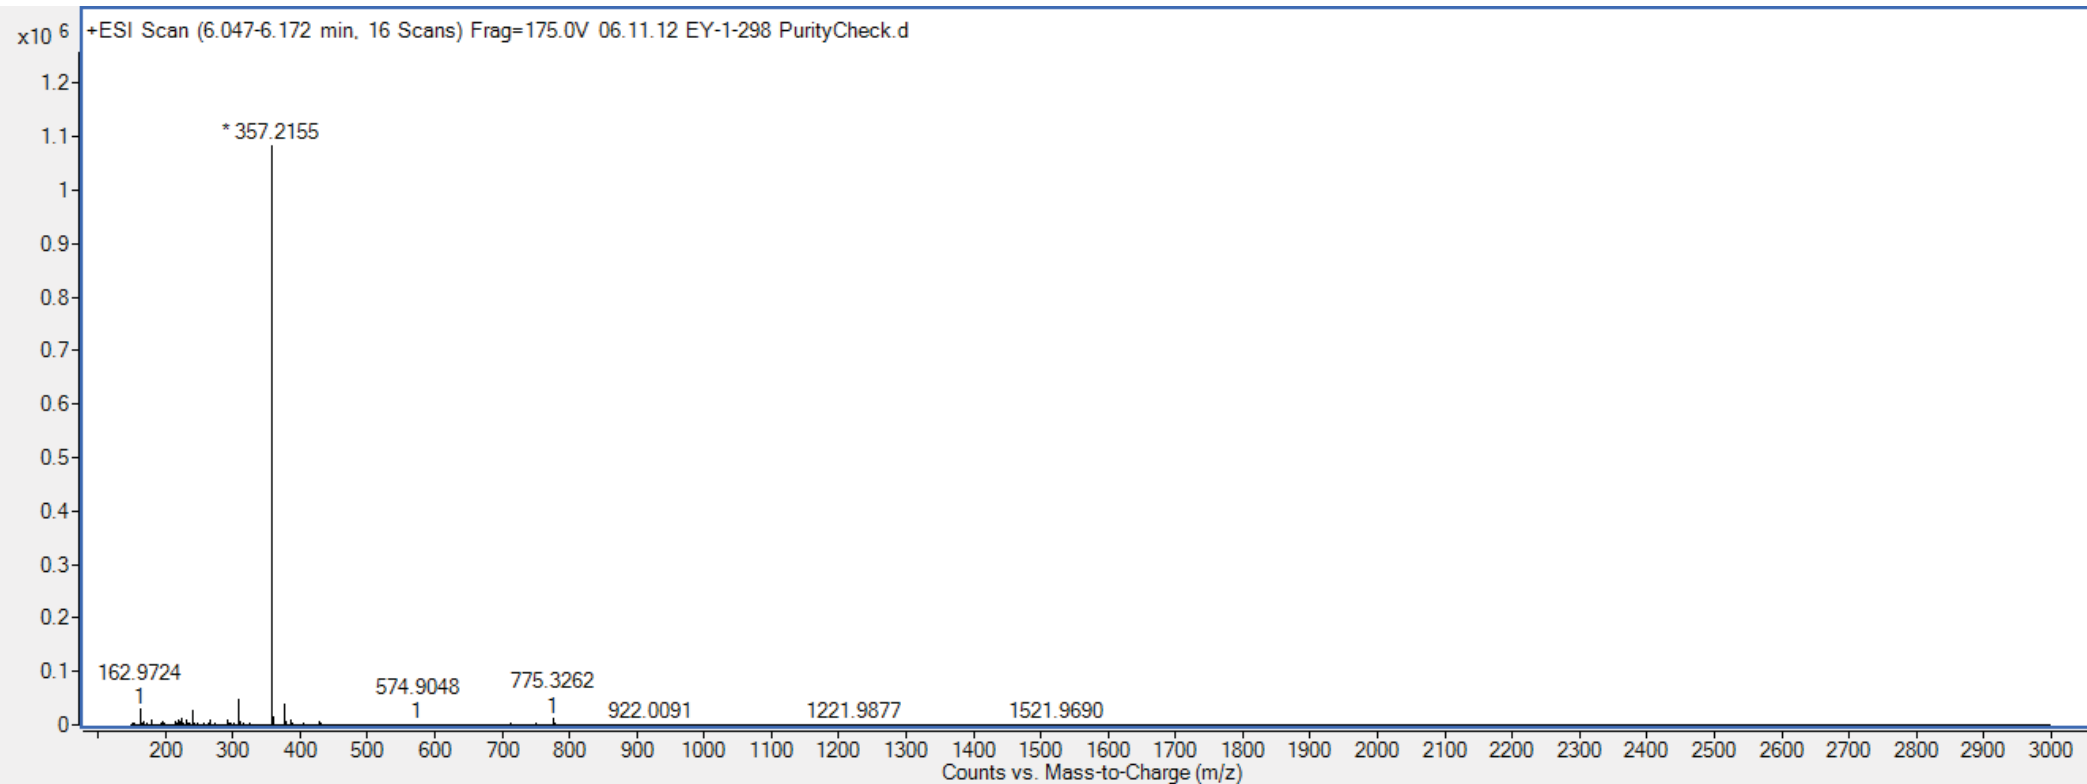

# 20c <sup>1</sup>H NMR

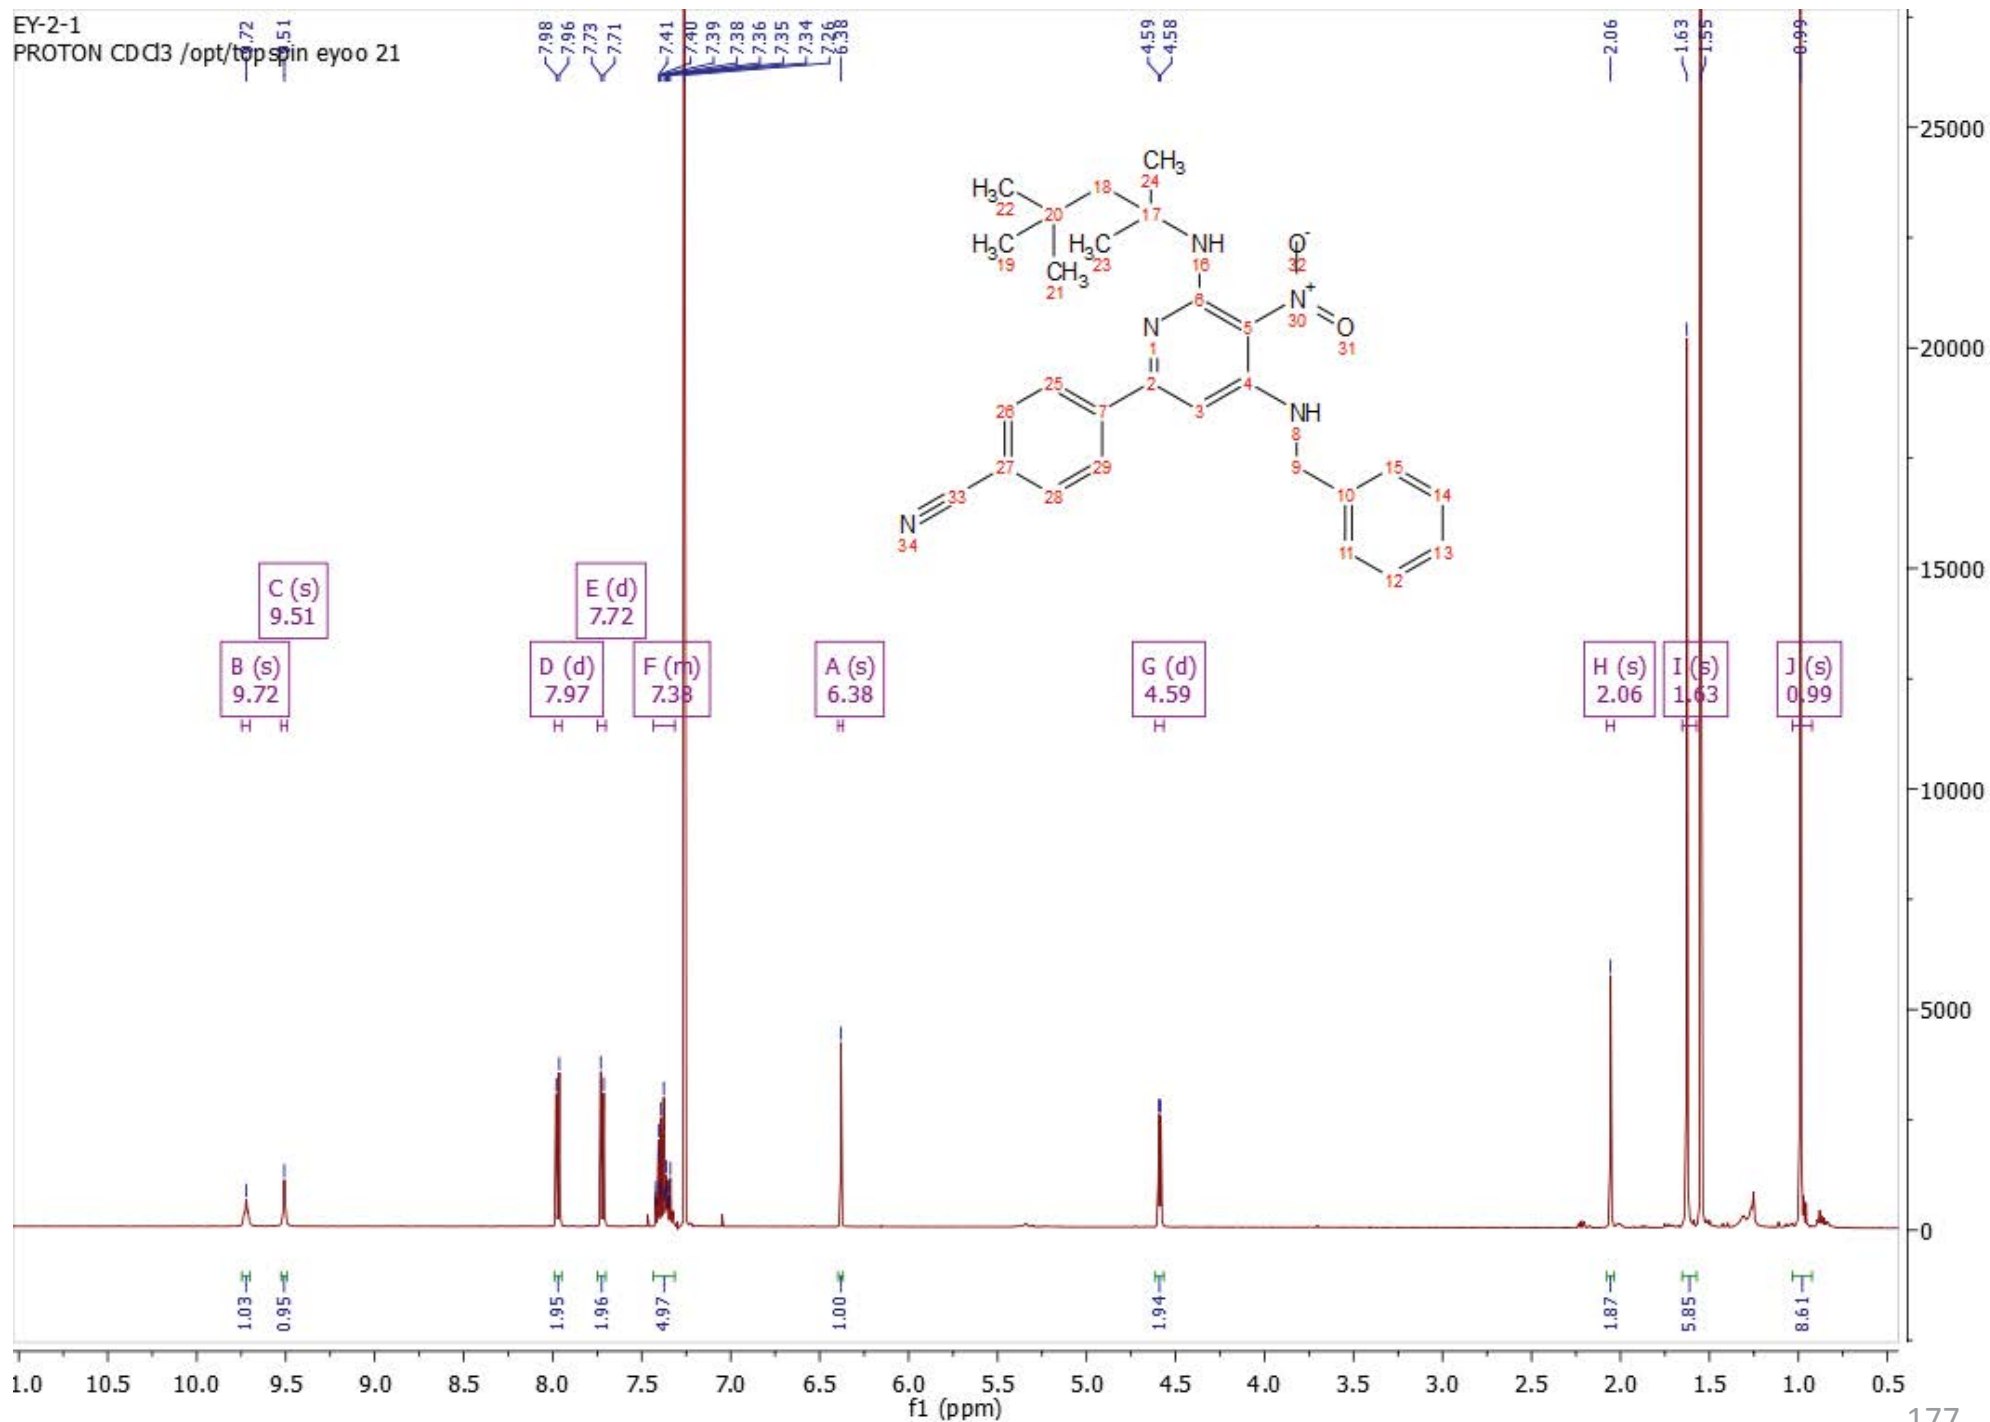

# 20c <sup>13</sup>C NMR

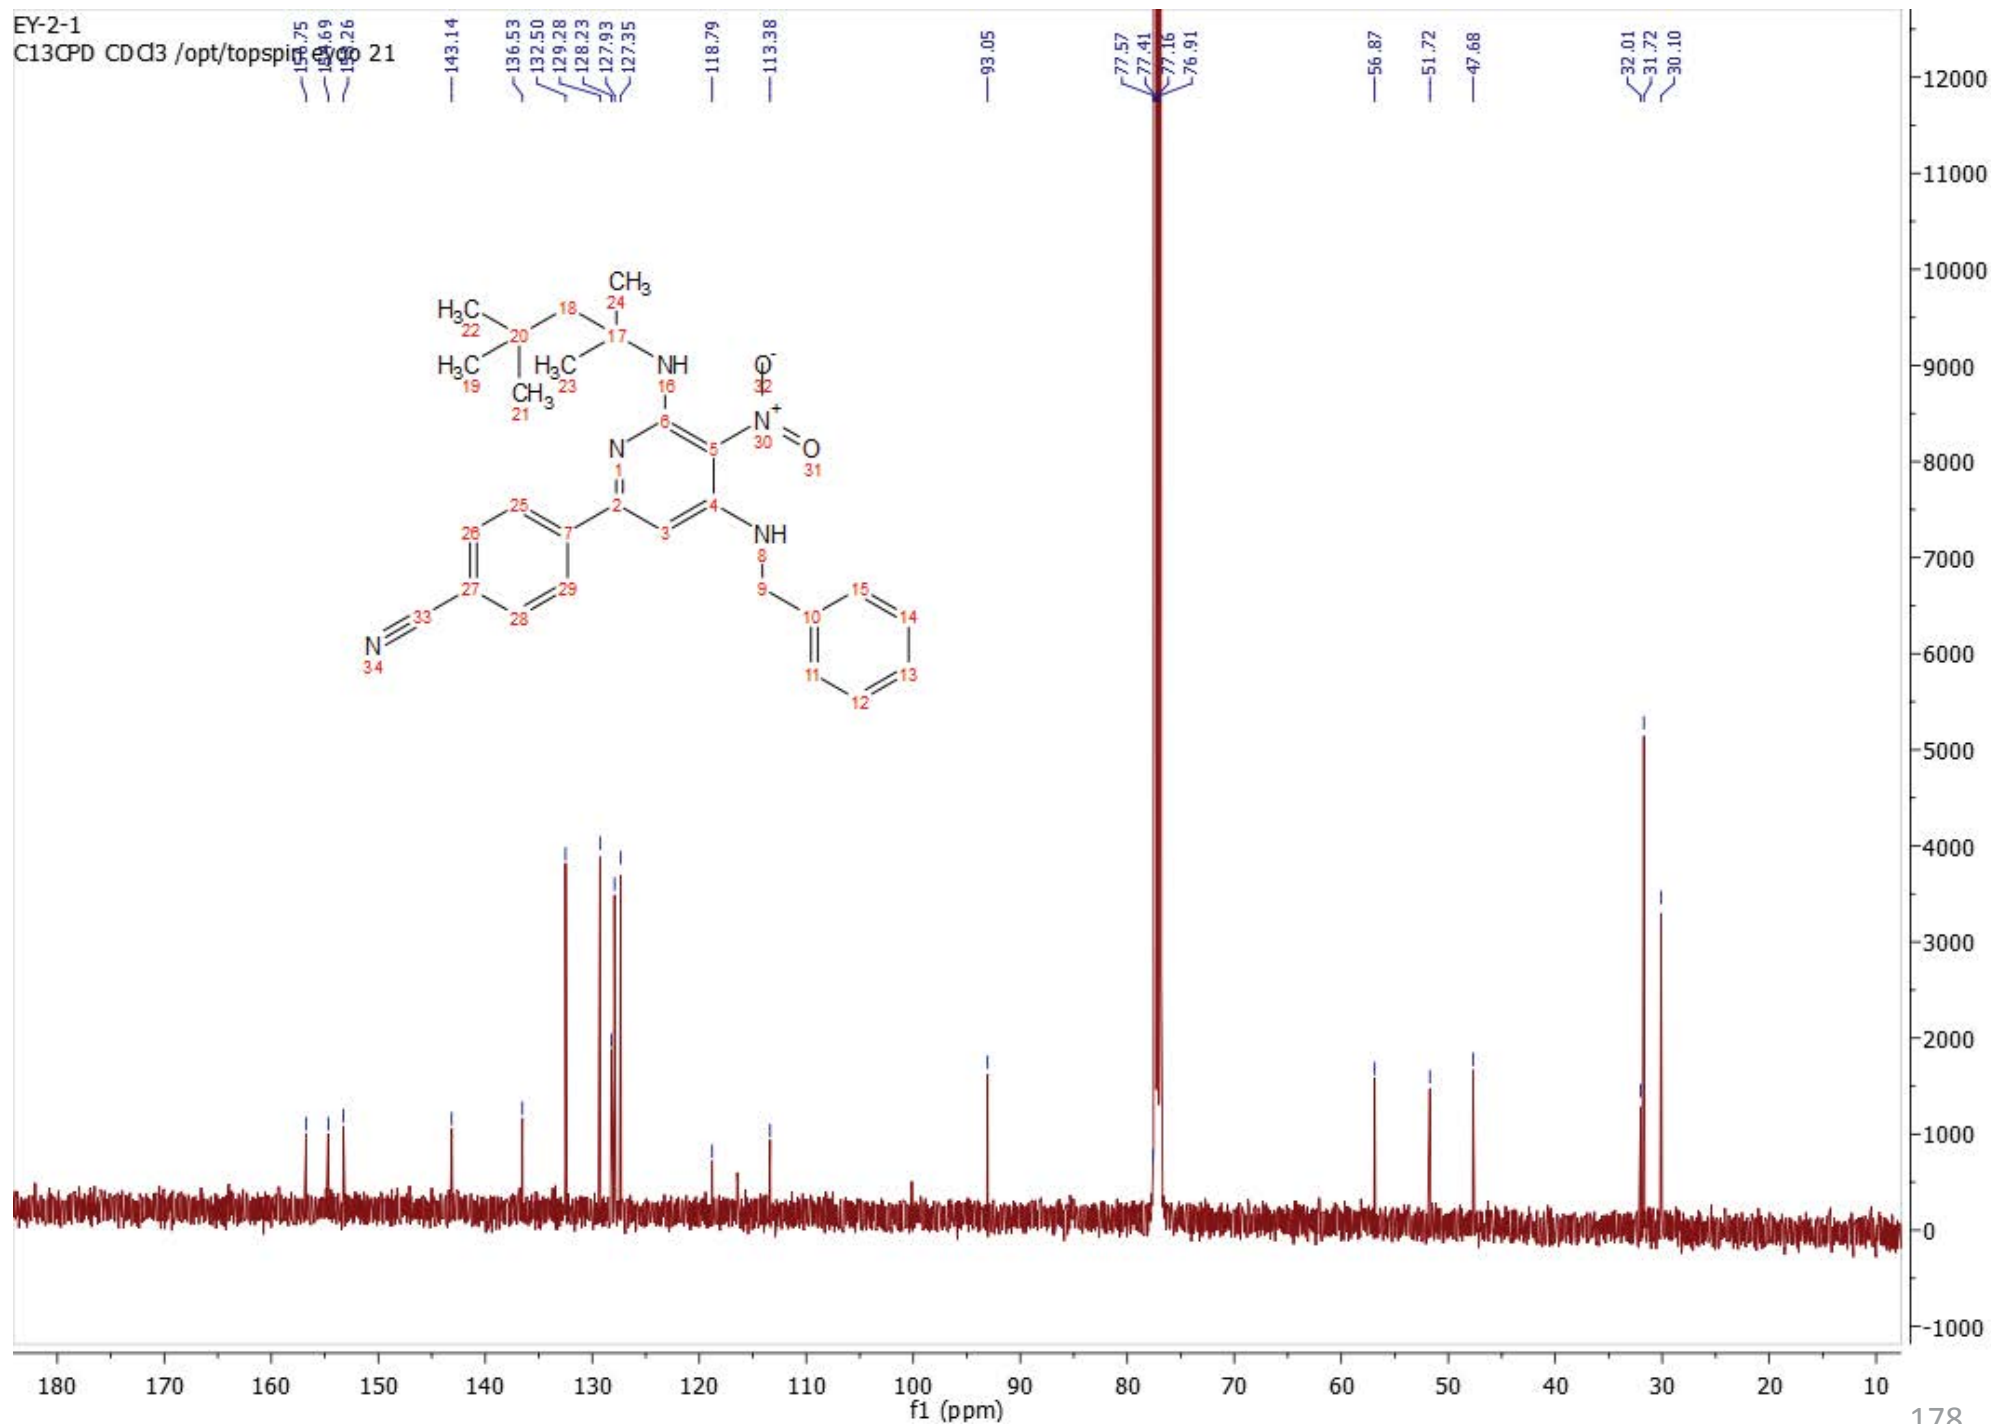

## 20c MS

|               |                      |             |                      |                 |              |                        |                       |
|---------------|----------------------|-------------|----------------------|-----------------|--------------|------------------------|-----------------------|
| Sample Name   | 04.20.12 EY-2-1 tube | Position    | Vial 1               | Instrument Name | Instrument 1 | User Name              |                       |
| Inj Vol       | -1                   | InjPosition |                      | SampleType      | Sample       | IRM Calibration Status | Success               |
| Data Filename | 04.20.12 EY-2-1 tube | ACQ Method  | Water-ACN Infusion M | Comment         |              | Acquired Time          | 4/20/2012 10:44:50 AM |

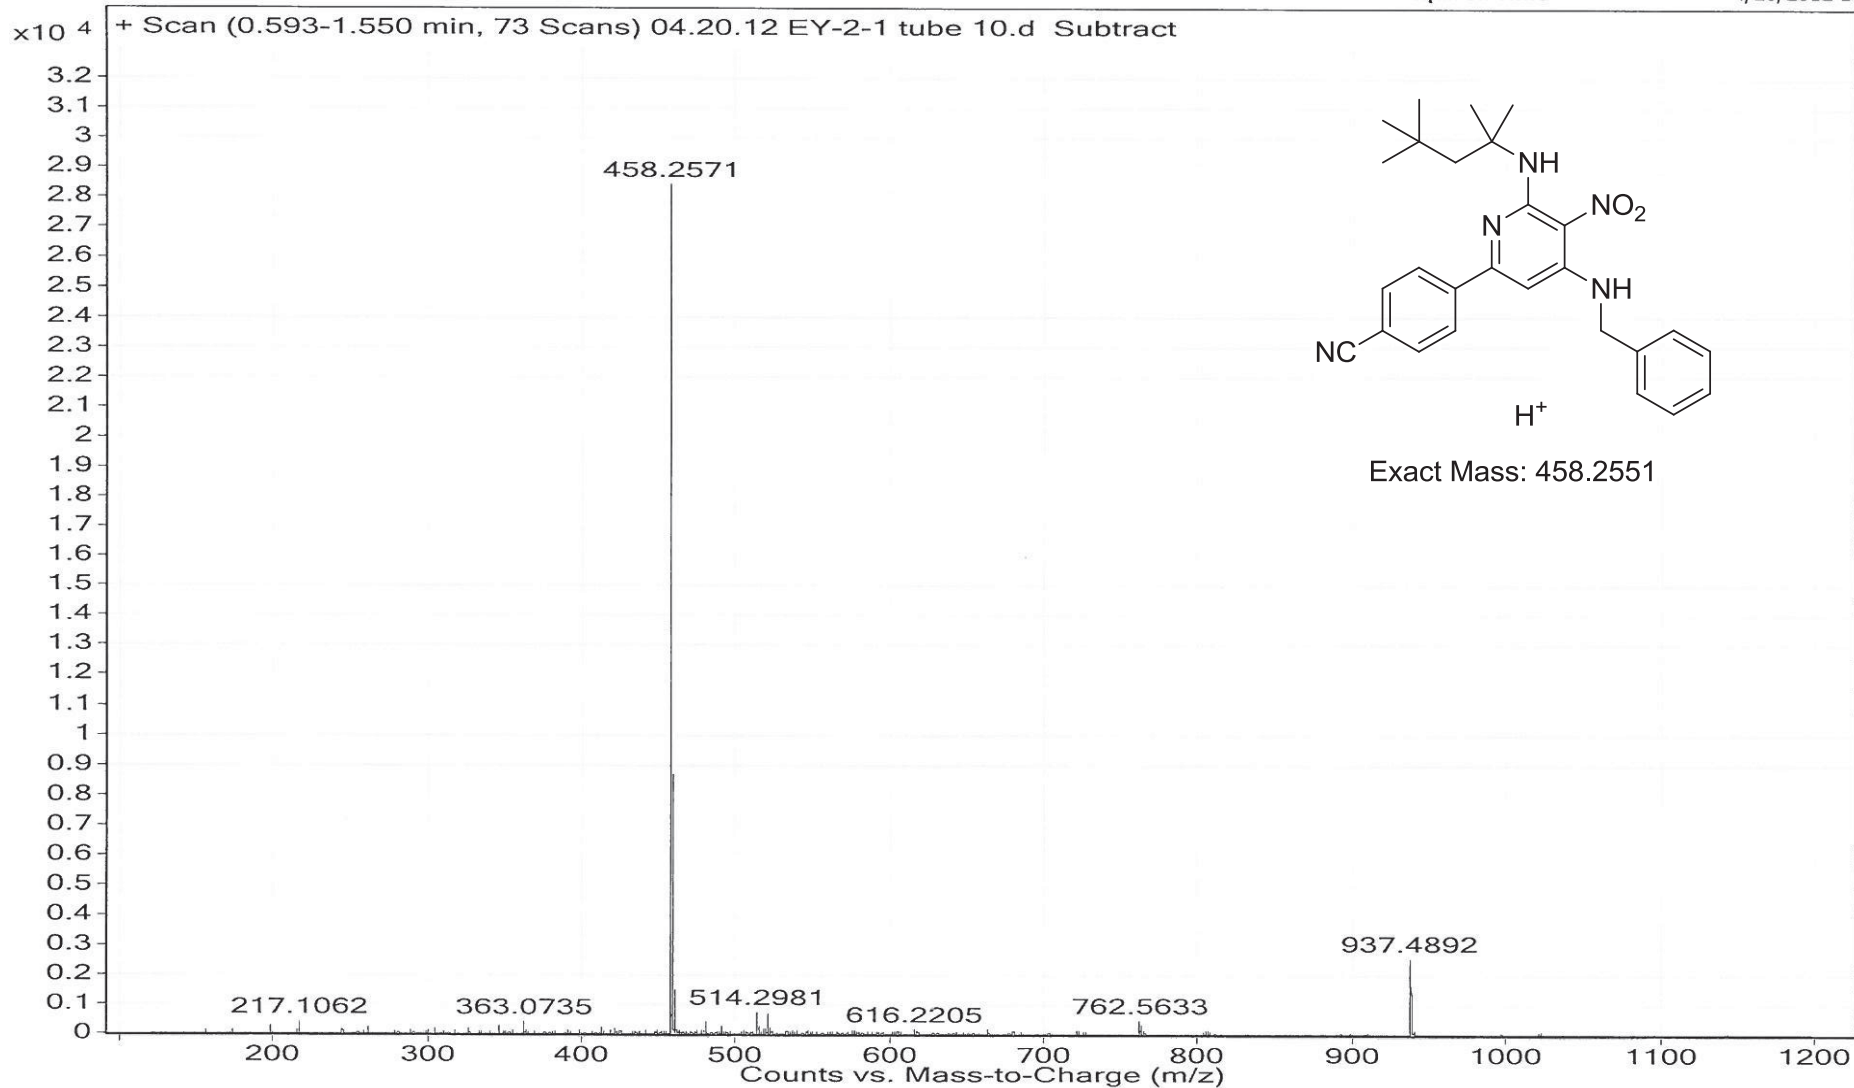

# 21c MS

|               |                      |             |                      |                 |              |                        |                      |
|---------------|----------------------|-------------|----------------------|-----------------|--------------|------------------------|----------------------|
| Sample Name   | 04.20.12 EY-2-3 tube | Position    | Vial 1               | Instrument Name | Instrument 1 | User Name              |                      |
| Inj Vol       | -1                   | InjPosition |                      | SampleType      | Sample       | IRM Calibration Status | Success              |
| Data Filename | 04.20.12 EY-2-3 tube | ACQ Method  | Water-ACN Infusion M | Comment         |              | Acquired Time          | 4/20/2012 2:29:52 PM |

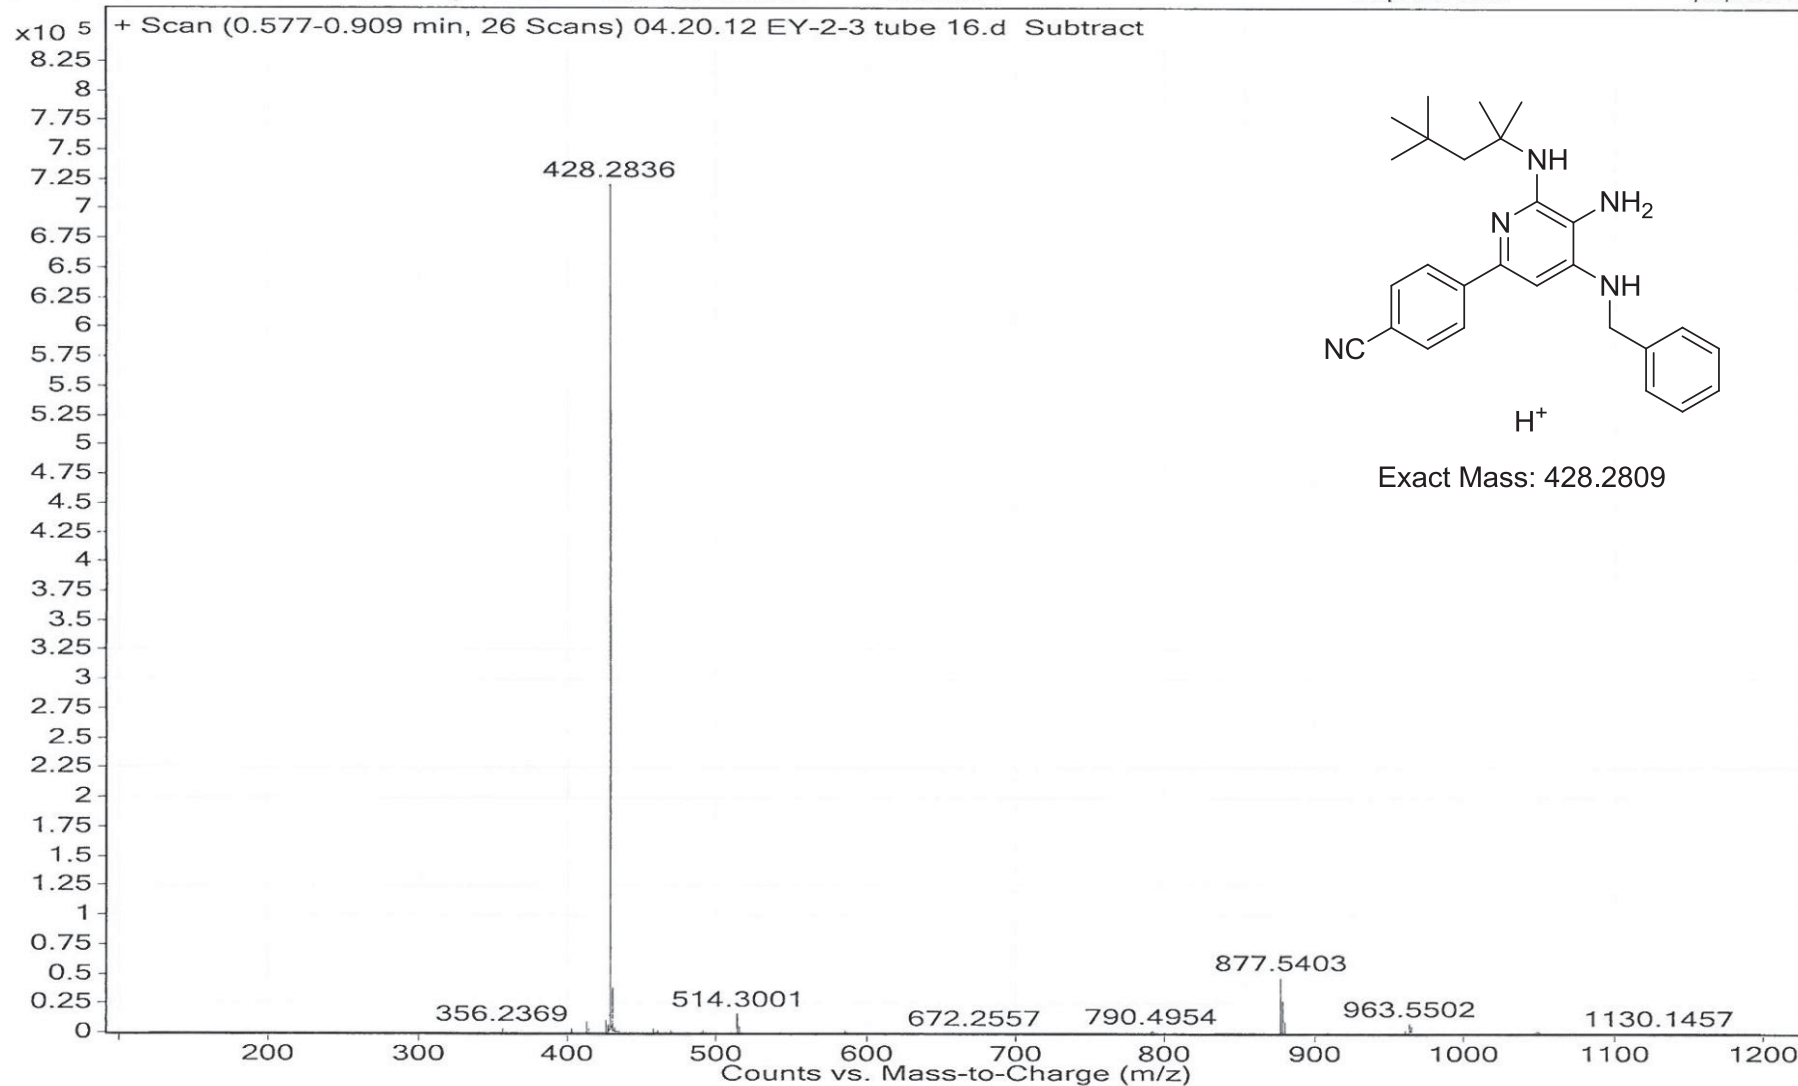



# 22c <sup>1</sup>H NMR

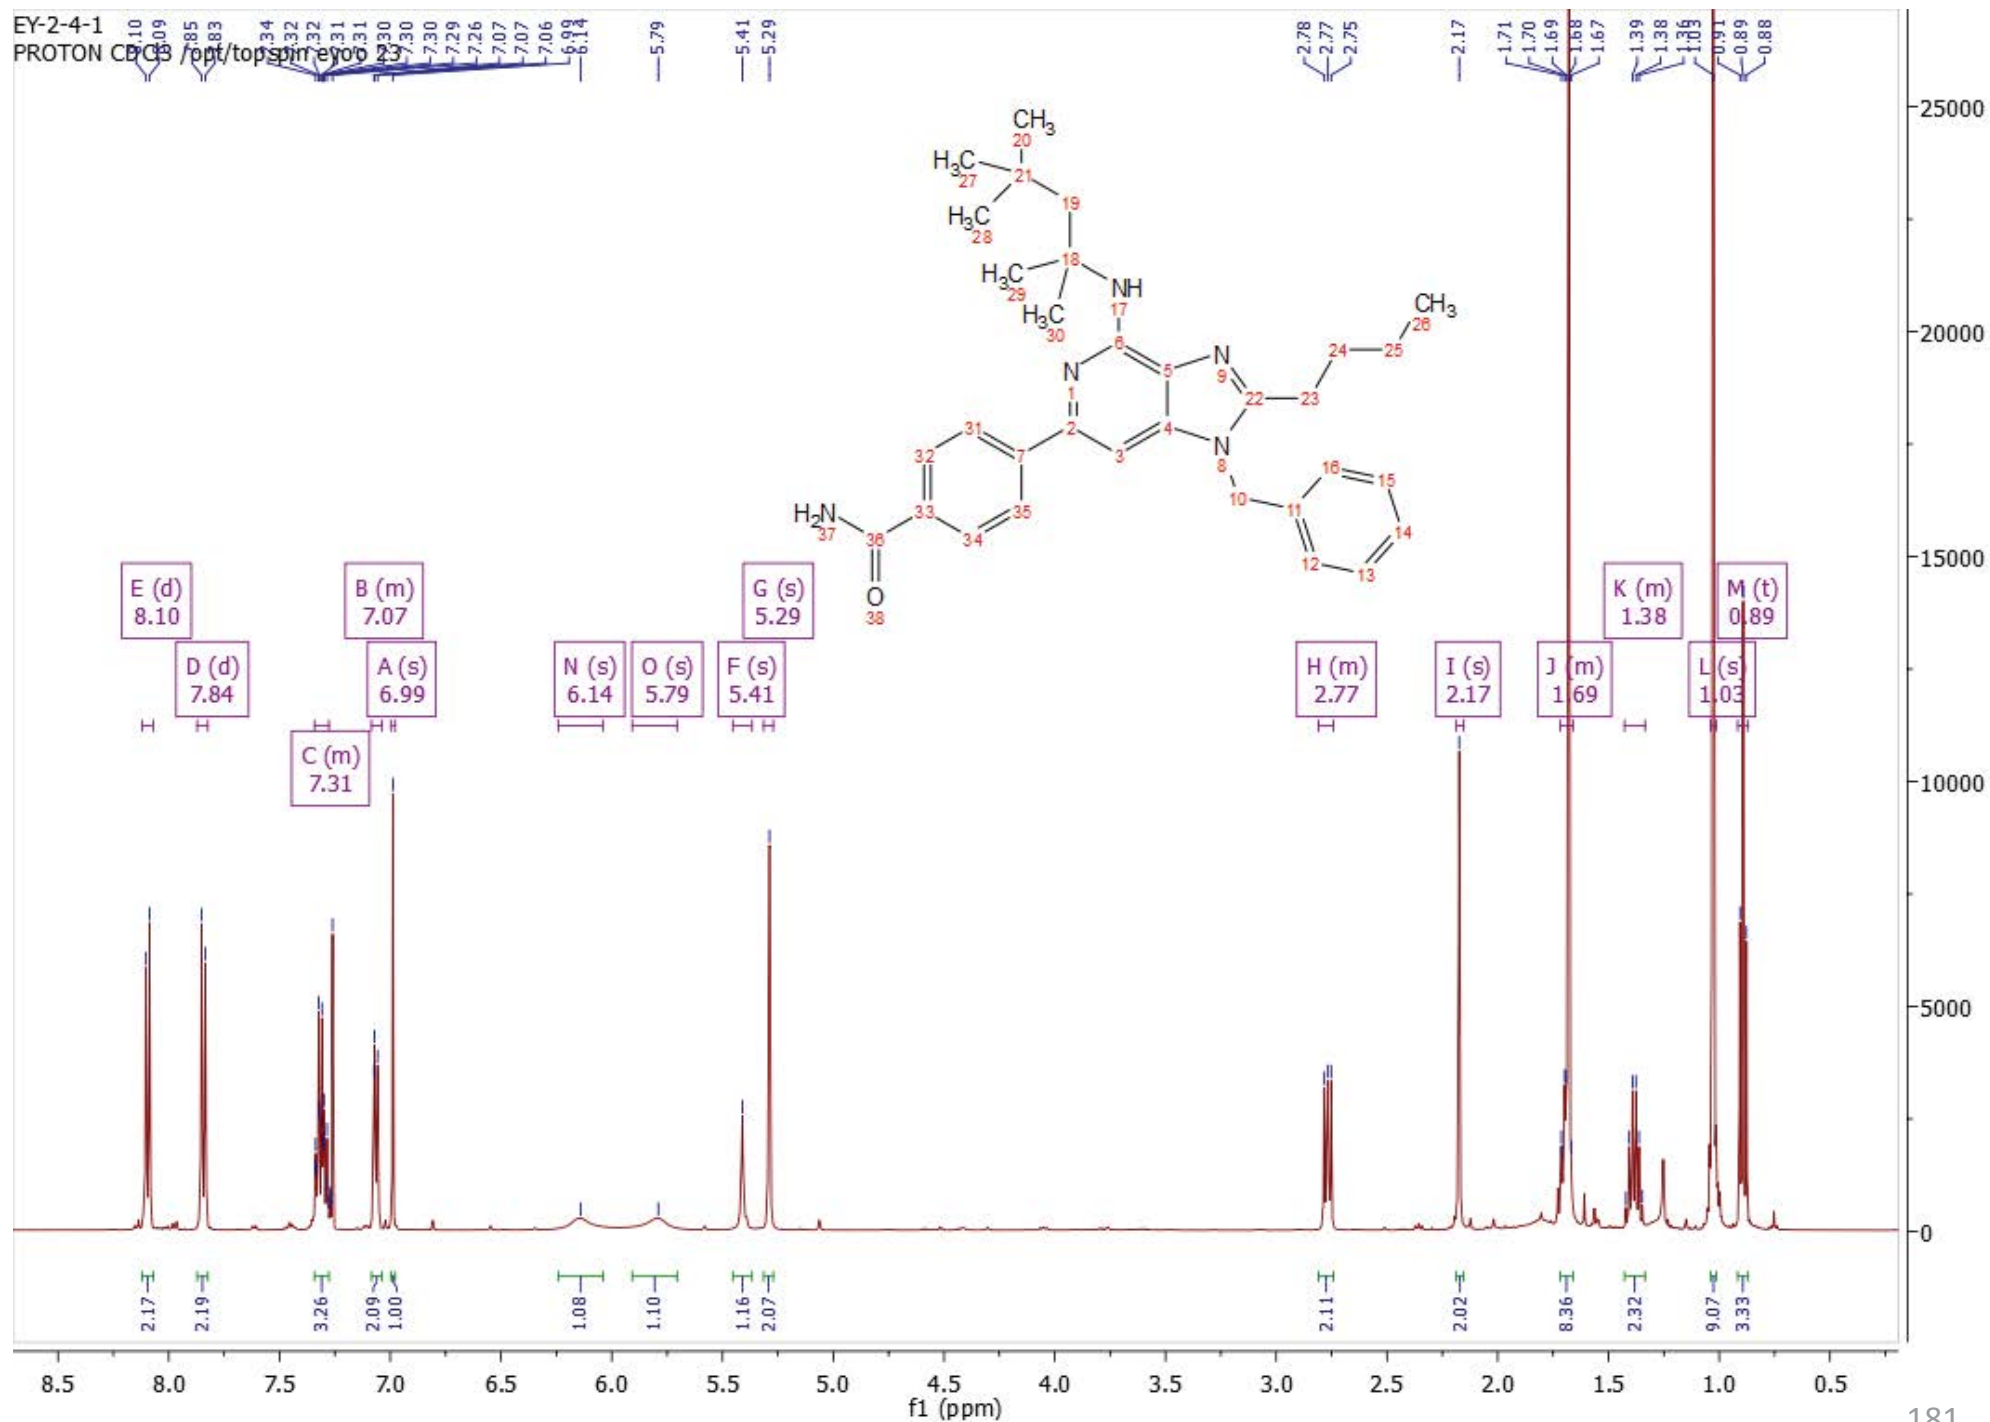

# 22c <sup>13</sup>C NMR

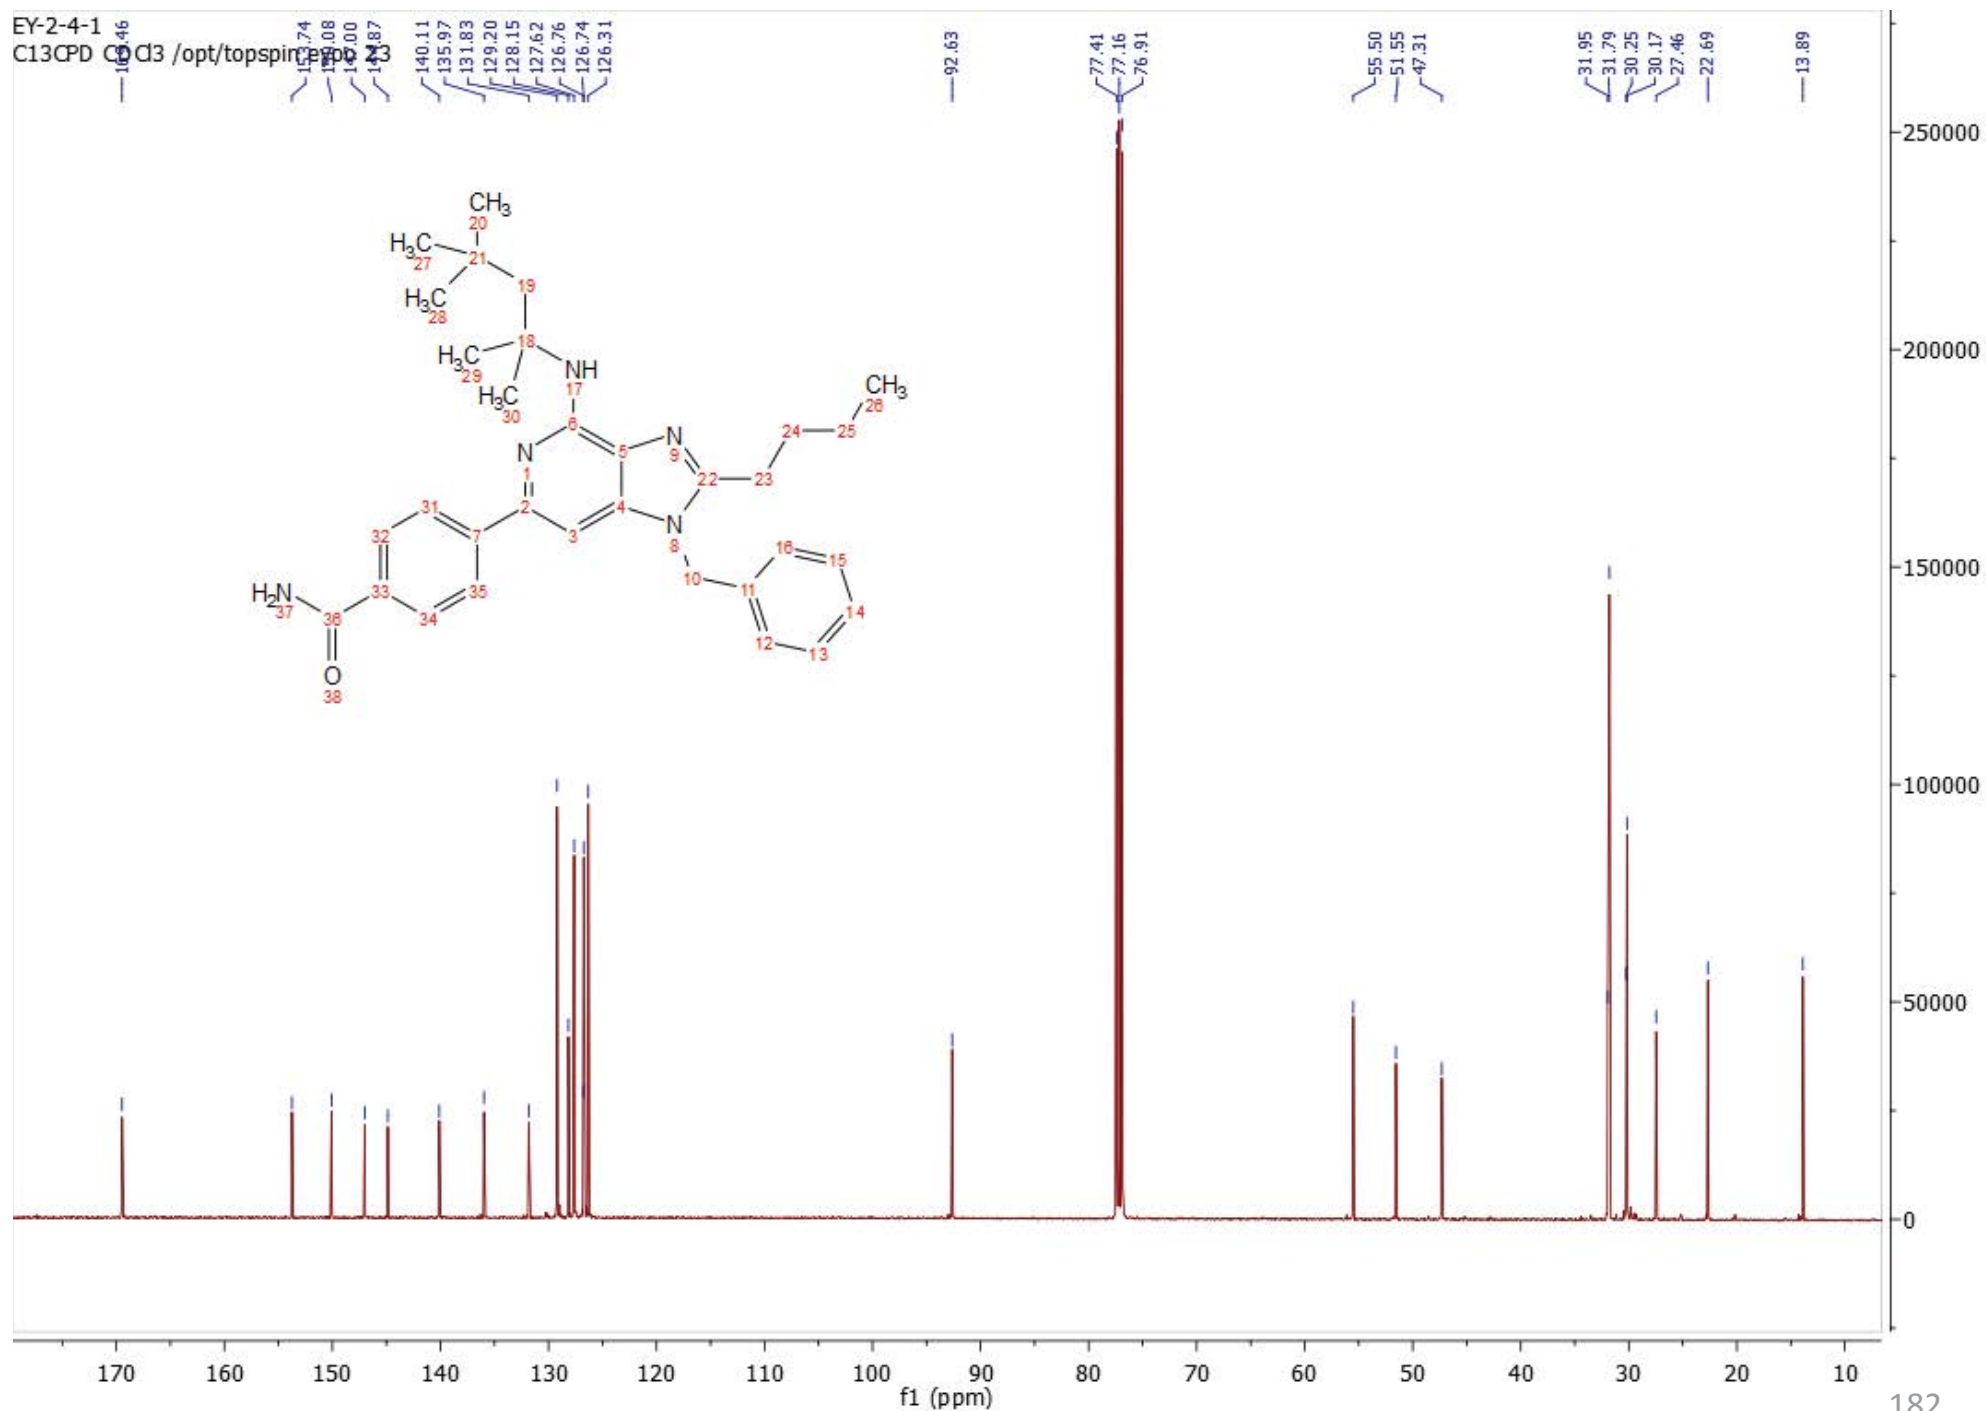

## 22c MS

|               |                      |             |                      |                 |              |                        |                       |
|---------------|----------------------|-------------|----------------------|-----------------|--------------|------------------------|-----------------------|
| Sample Name   | 04.25.12 EY-2-4 tube | Position    | Vial 1               | Instrument Name | Instrument 1 | User Name              |                       |
| Inj Vol       | -1                   | InjPosition |                      | SampleType      | Sample       | IRM Calibration Status | Success               |
| Data Filename | 04.25.12 EY-2-4 tube | ACQ Method  | Water-ACN Infusion M | Comment         |              | Acquired Time          | 4/25/2012 12:28:30 PM |

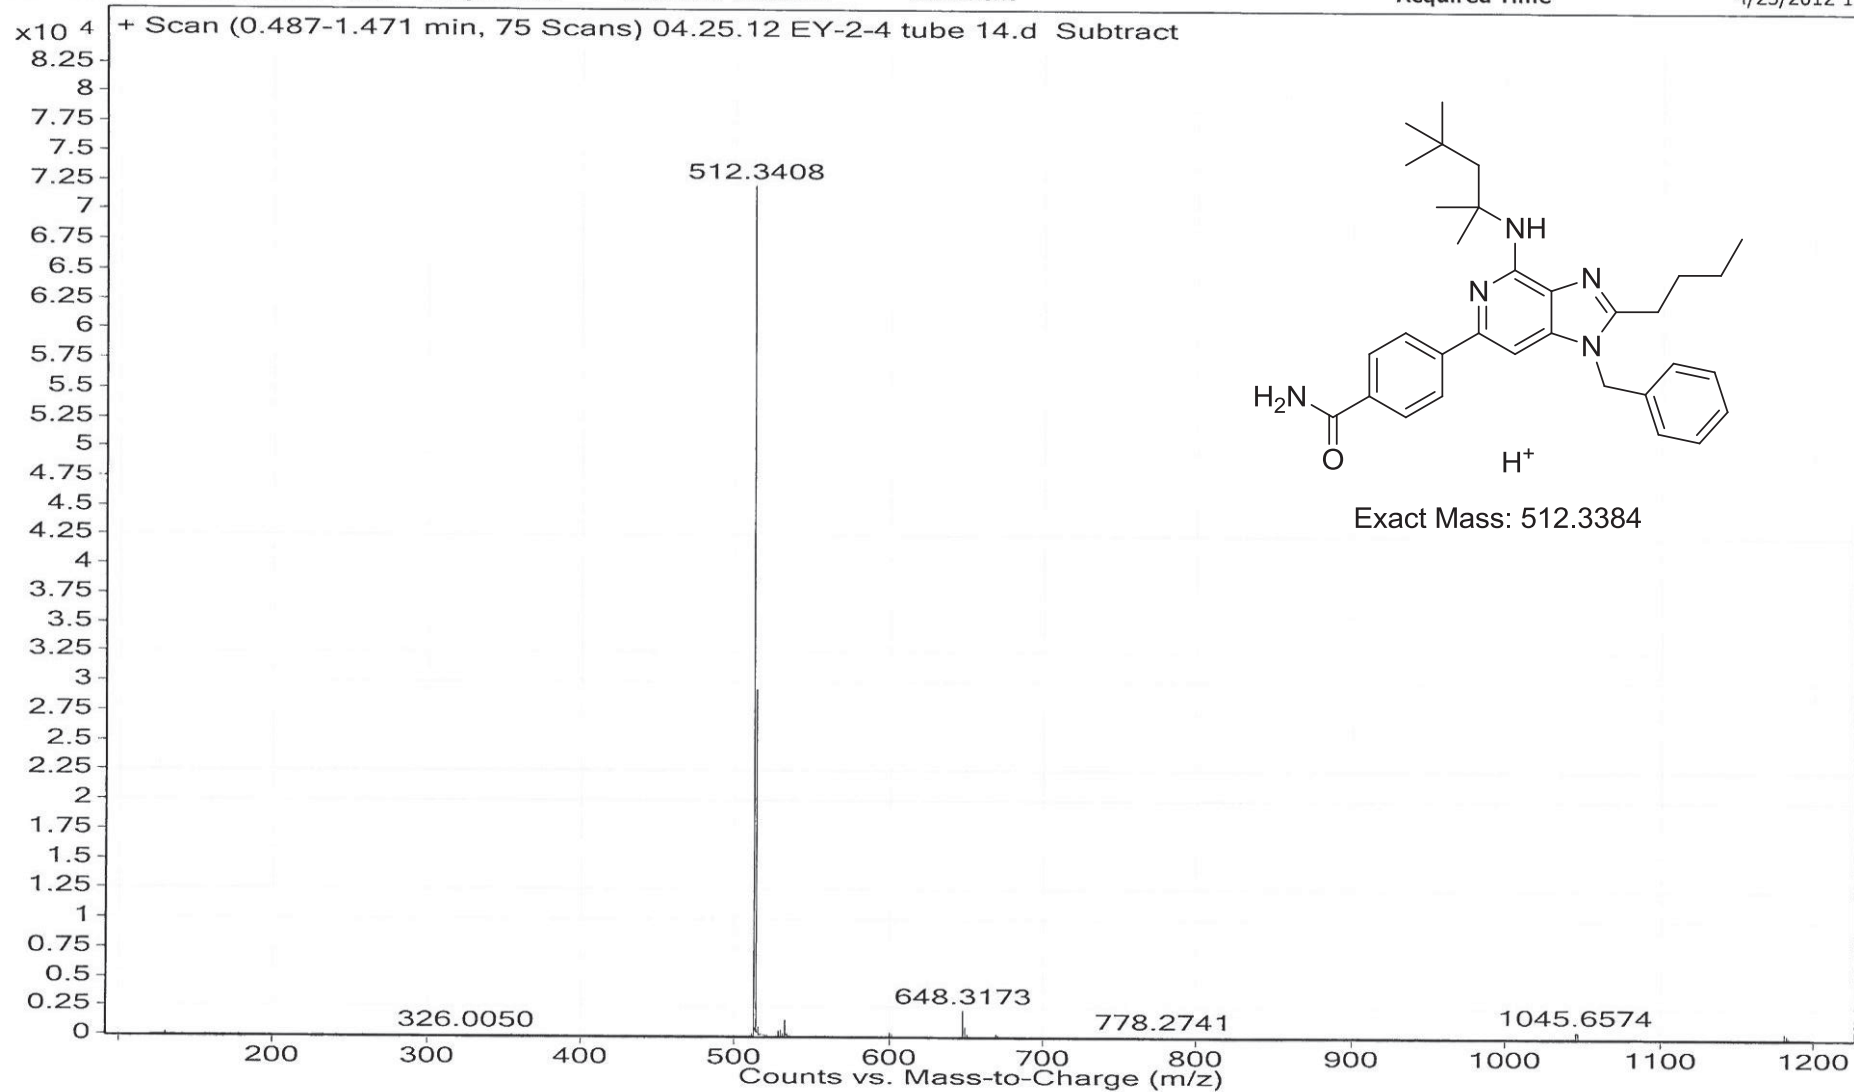

# 23c <sup>1</sup>H NMR

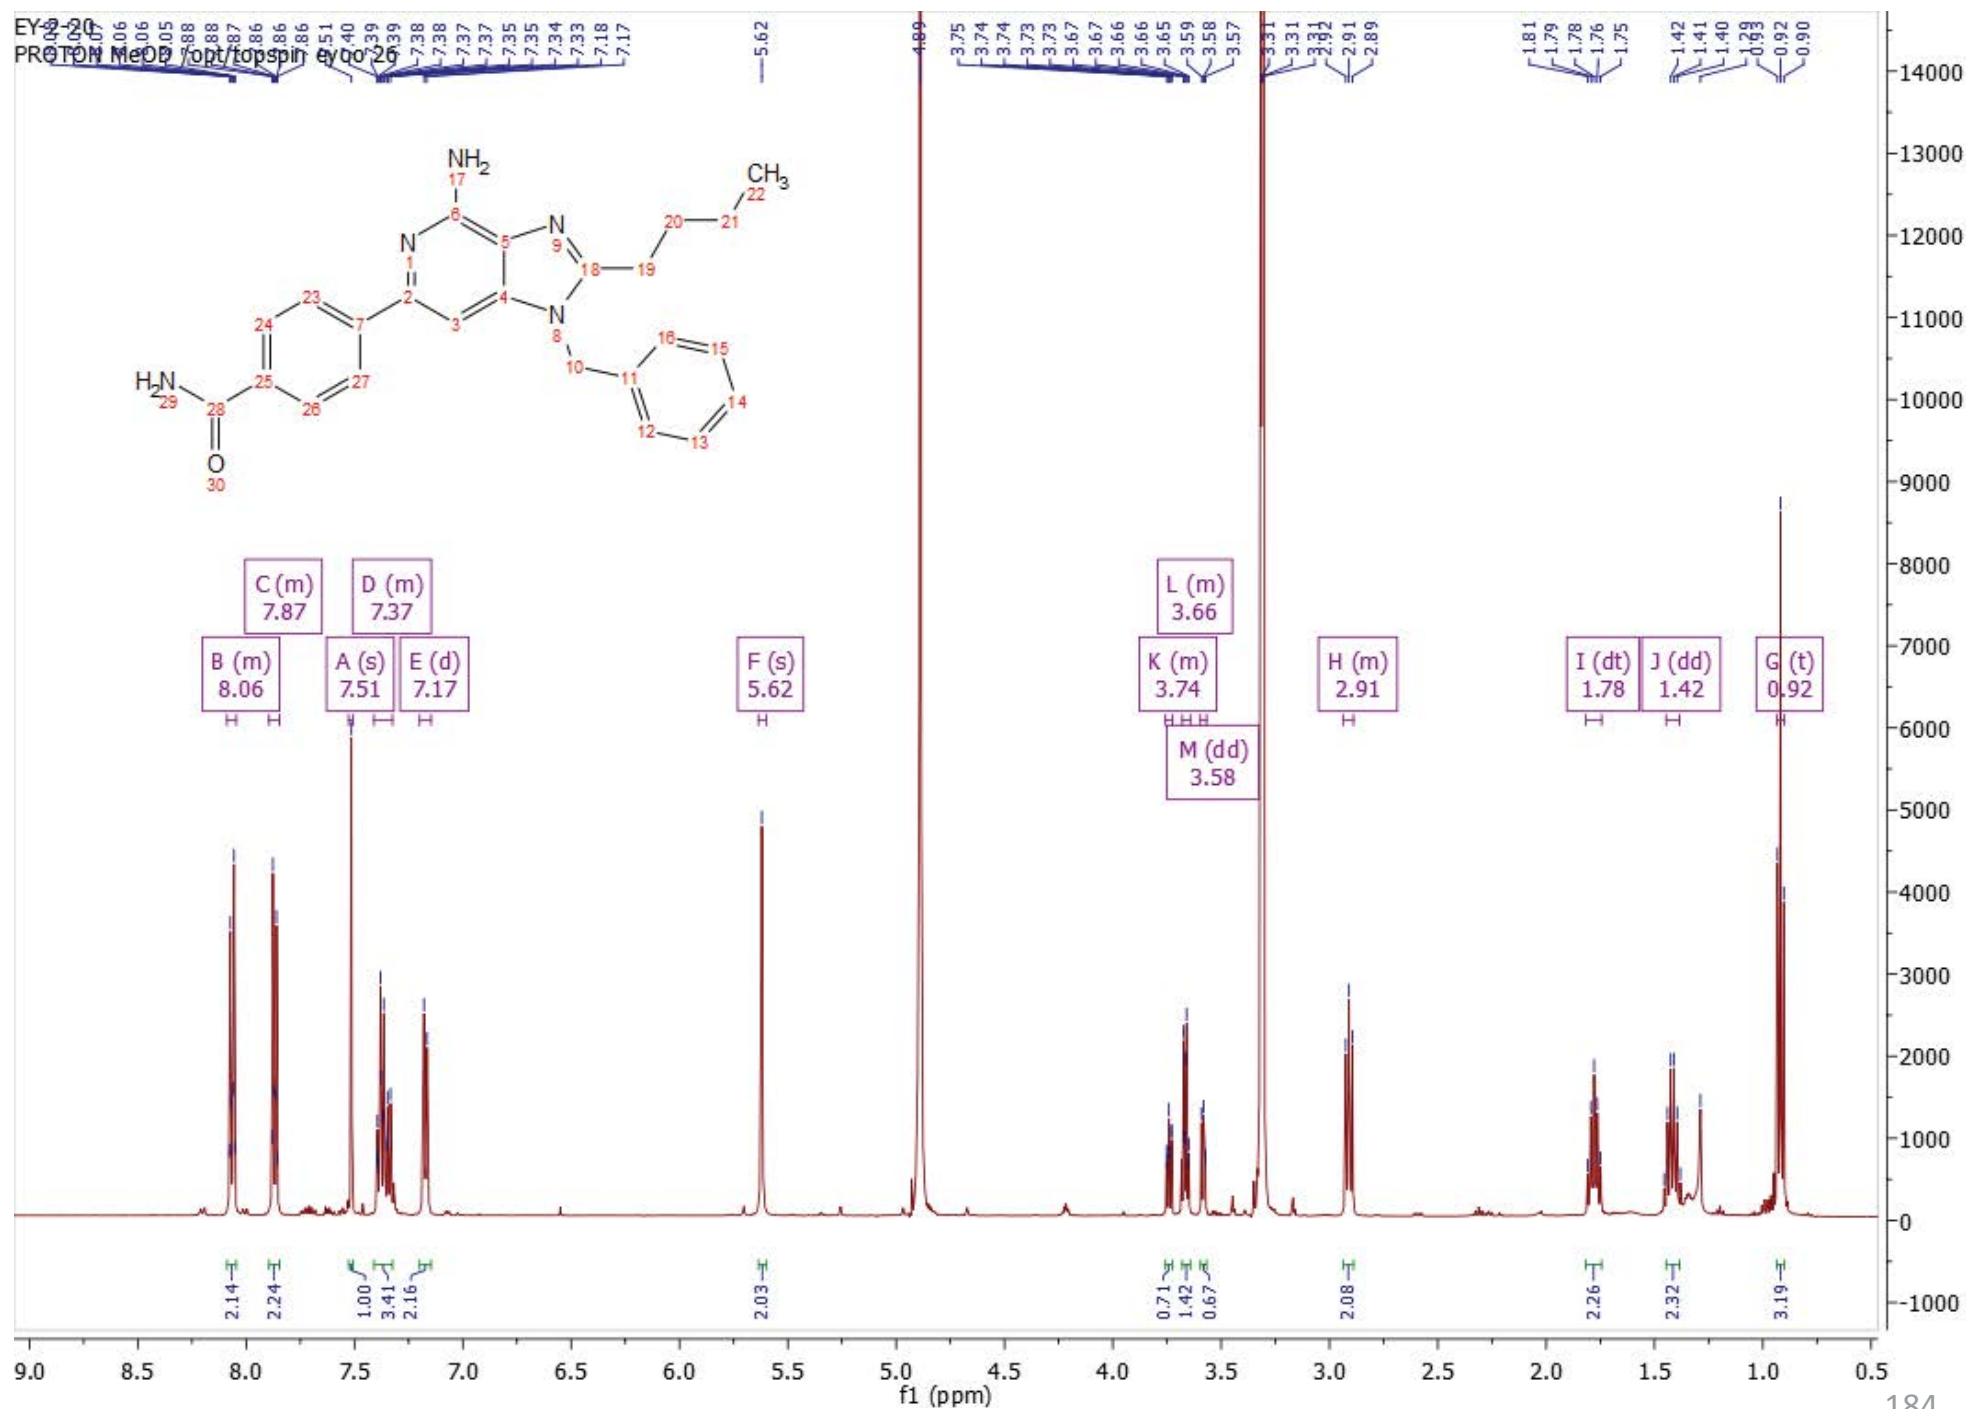

# **23c** <sup>13</sup>C NMR

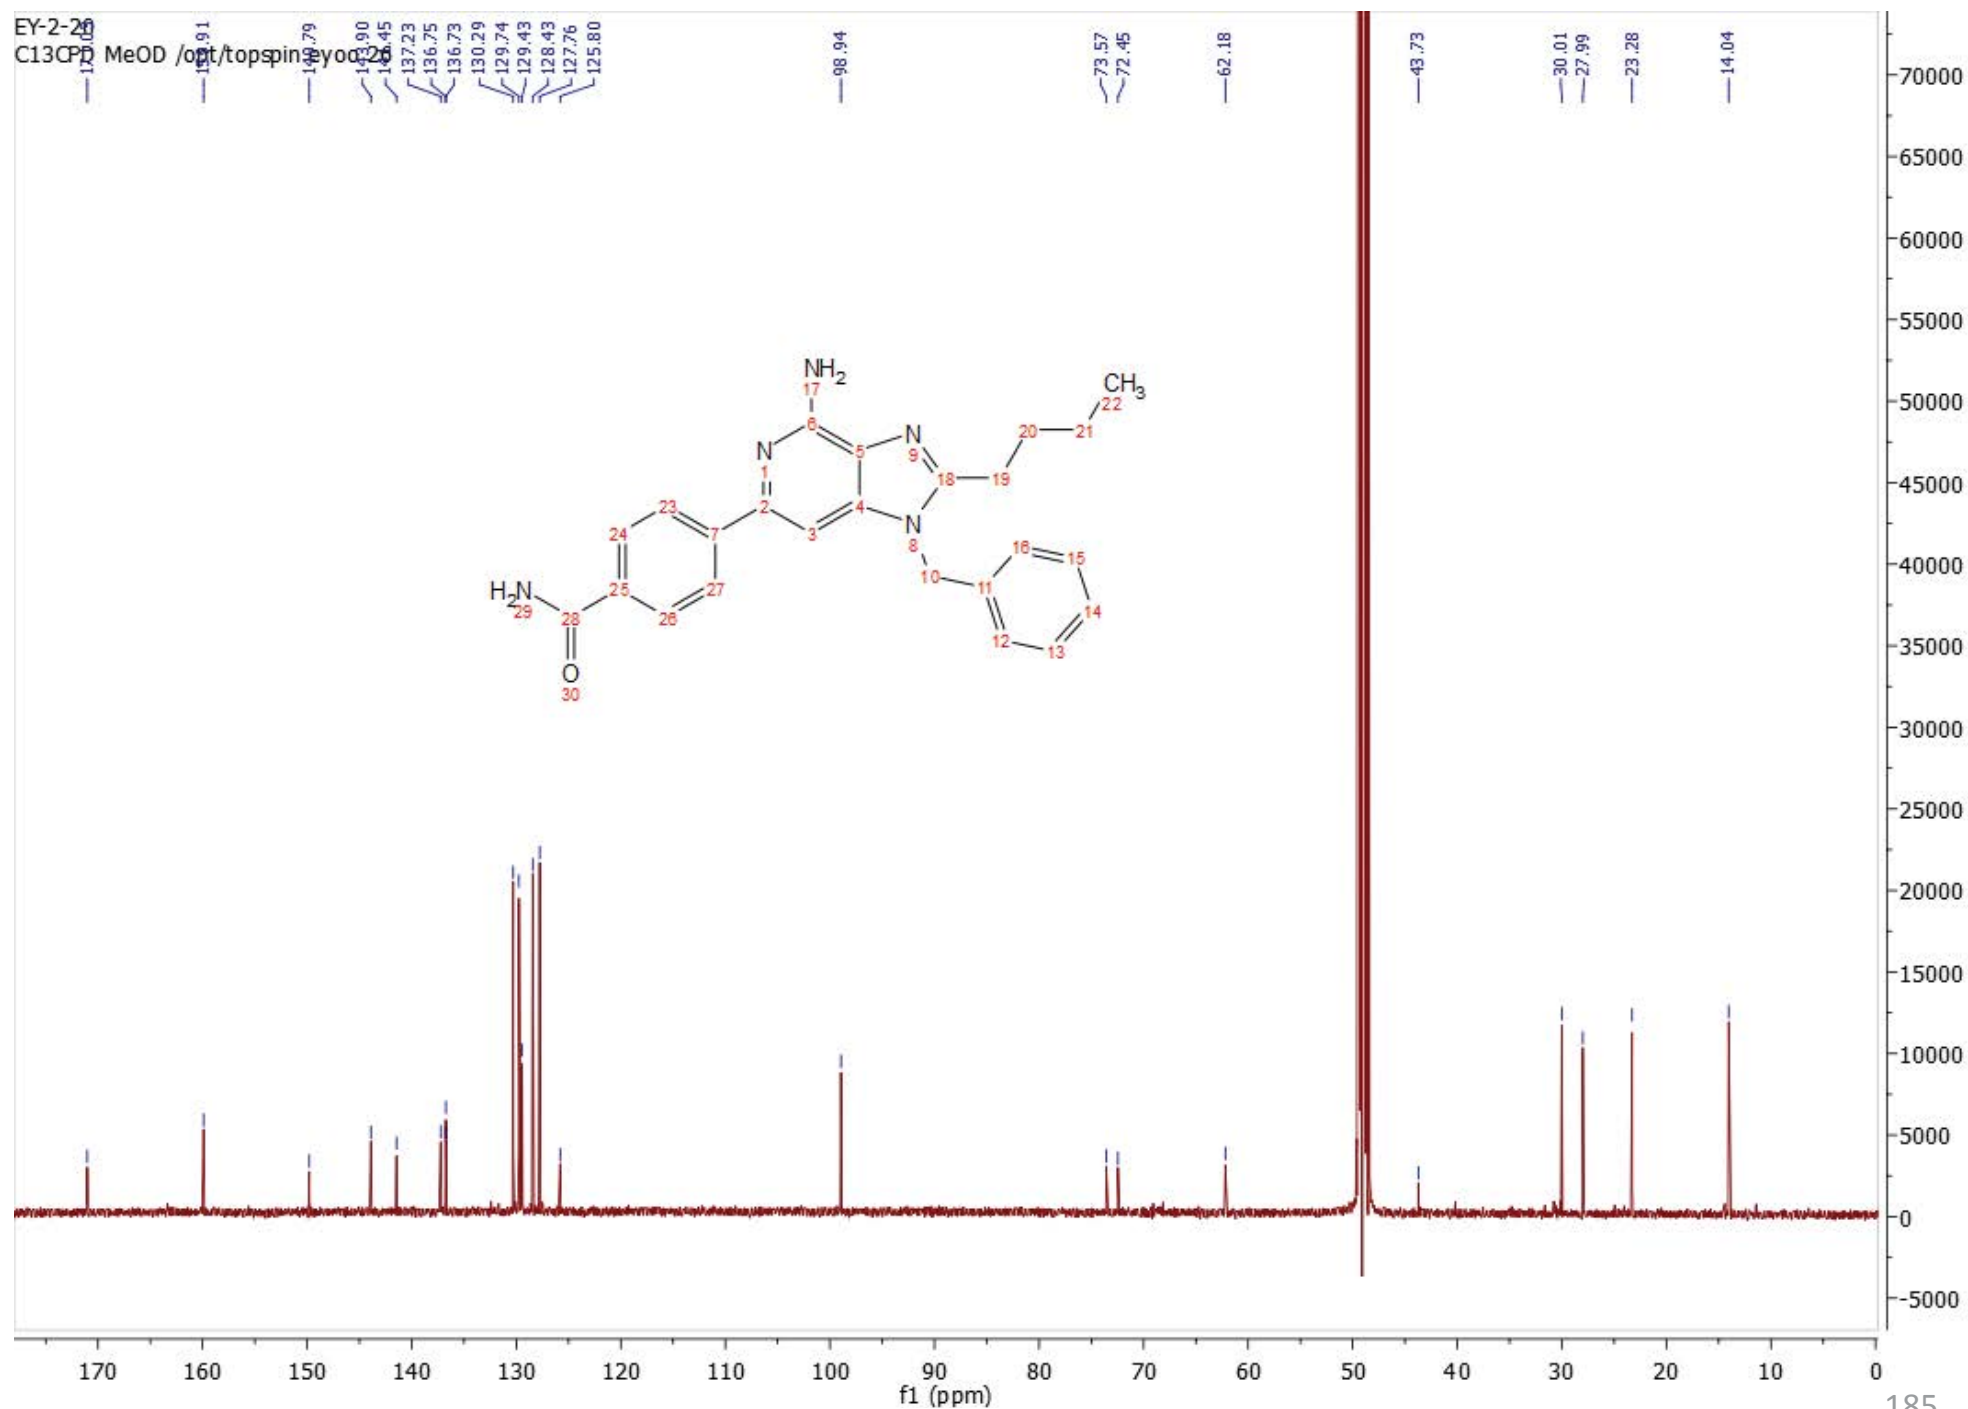

## 23c MS

|               |                    |             |                      |                 |              |                        |                     |
|---------------|--------------------|-------------|----------------------|-----------------|--------------|------------------------|---------------------|
| Sample Name   | 05.01.12 EY-2-20   | Position    | Vial 1               | Instrument Name | Instrument 1 | User Name              |                     |
| Inj Vol       | -1                 | InjPosition |                      | SampleType      | Sample       | IRM Calibration Status | Success             |
| Data Filename | 05.01.12 EY-2-20.d | ACQ Method  | Water-ACN Infusion M | Comment         |              | Acquired Time          | 5/1/2012 5:43:06 PM |

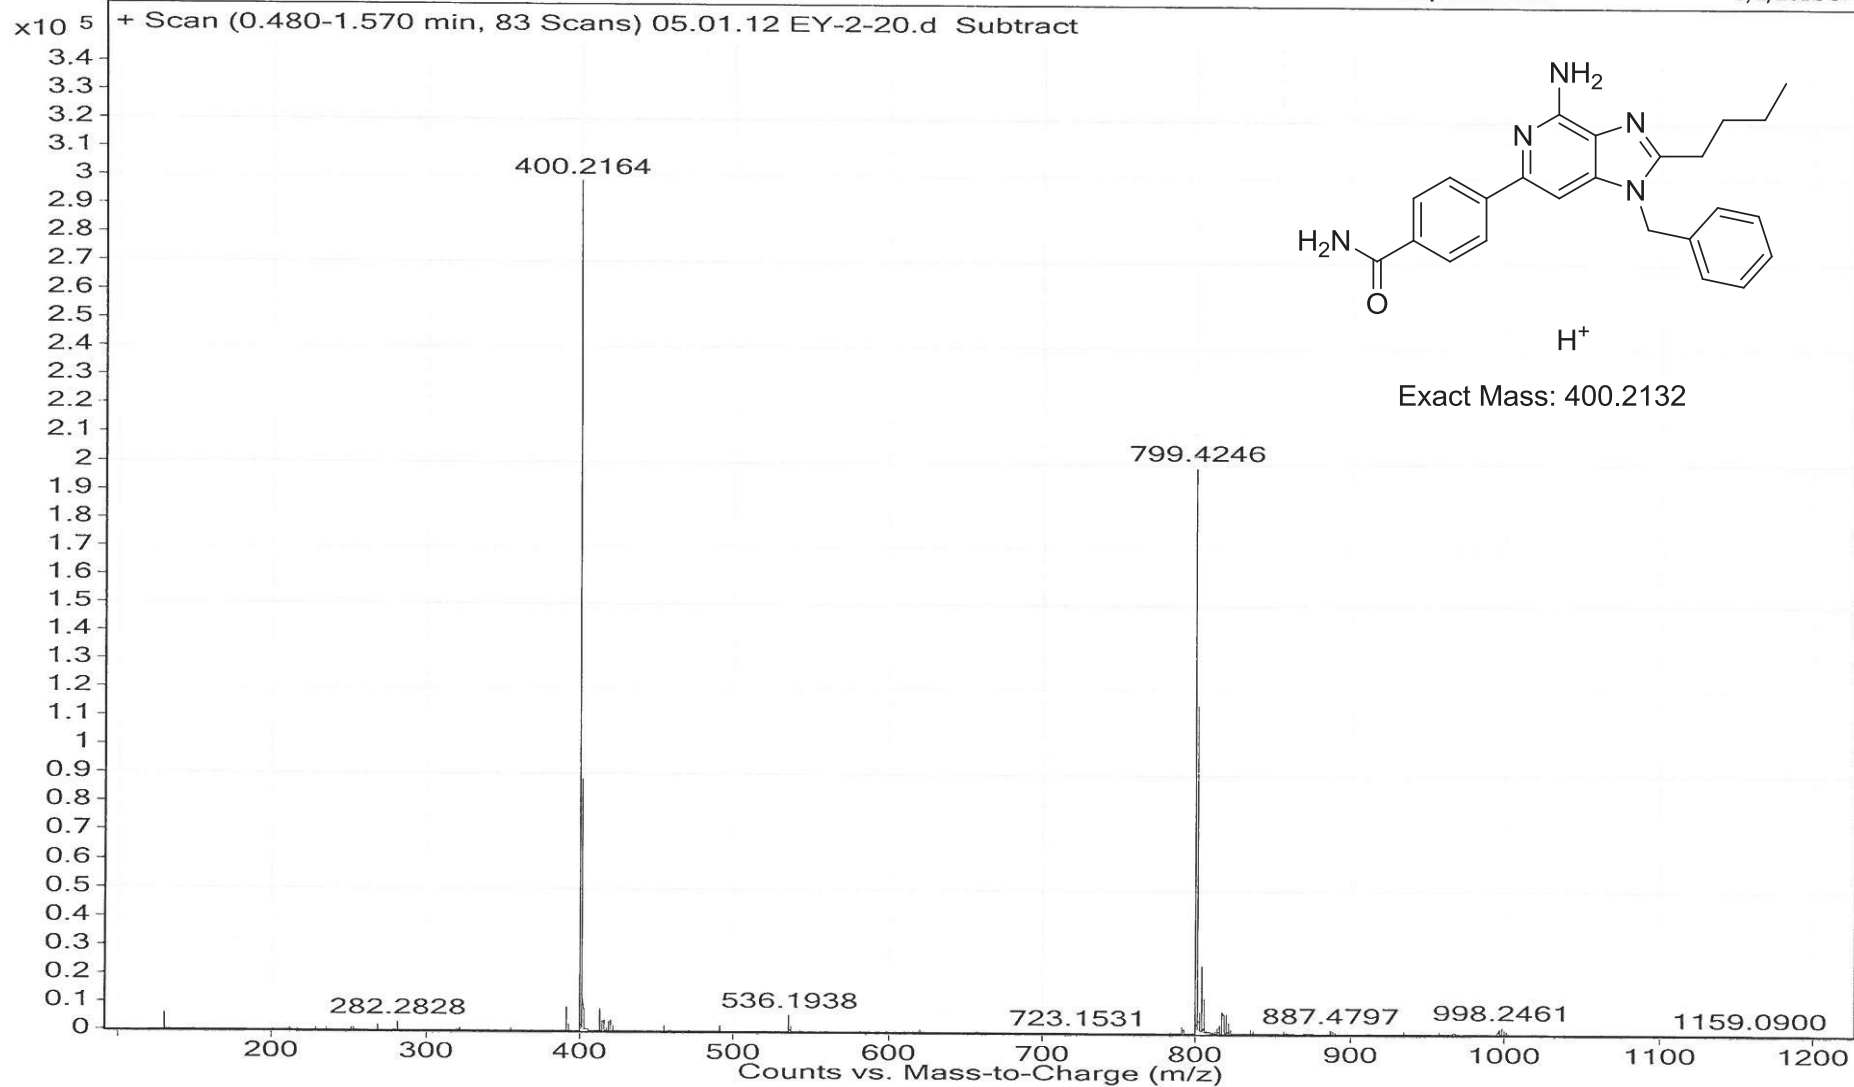



## 23c LC-MS

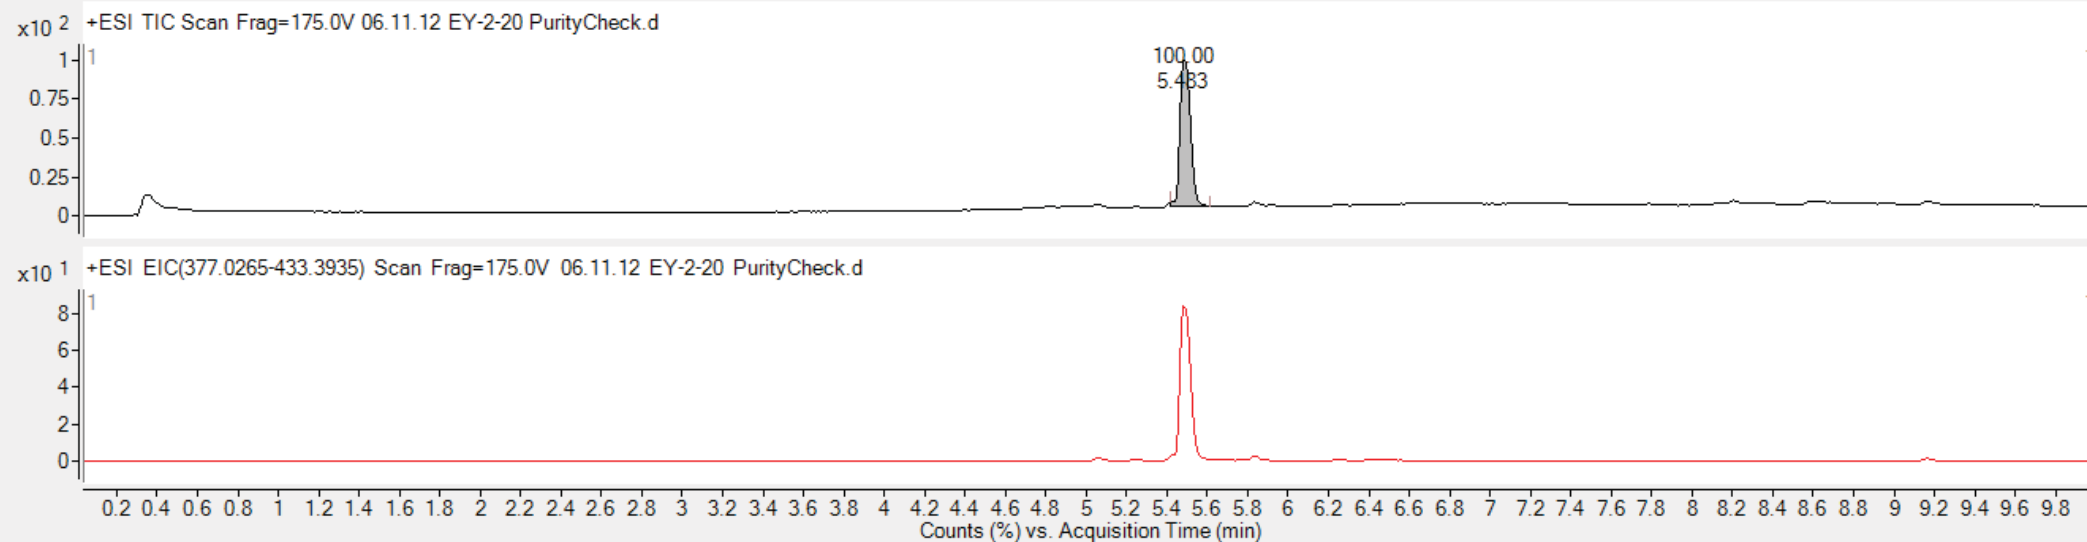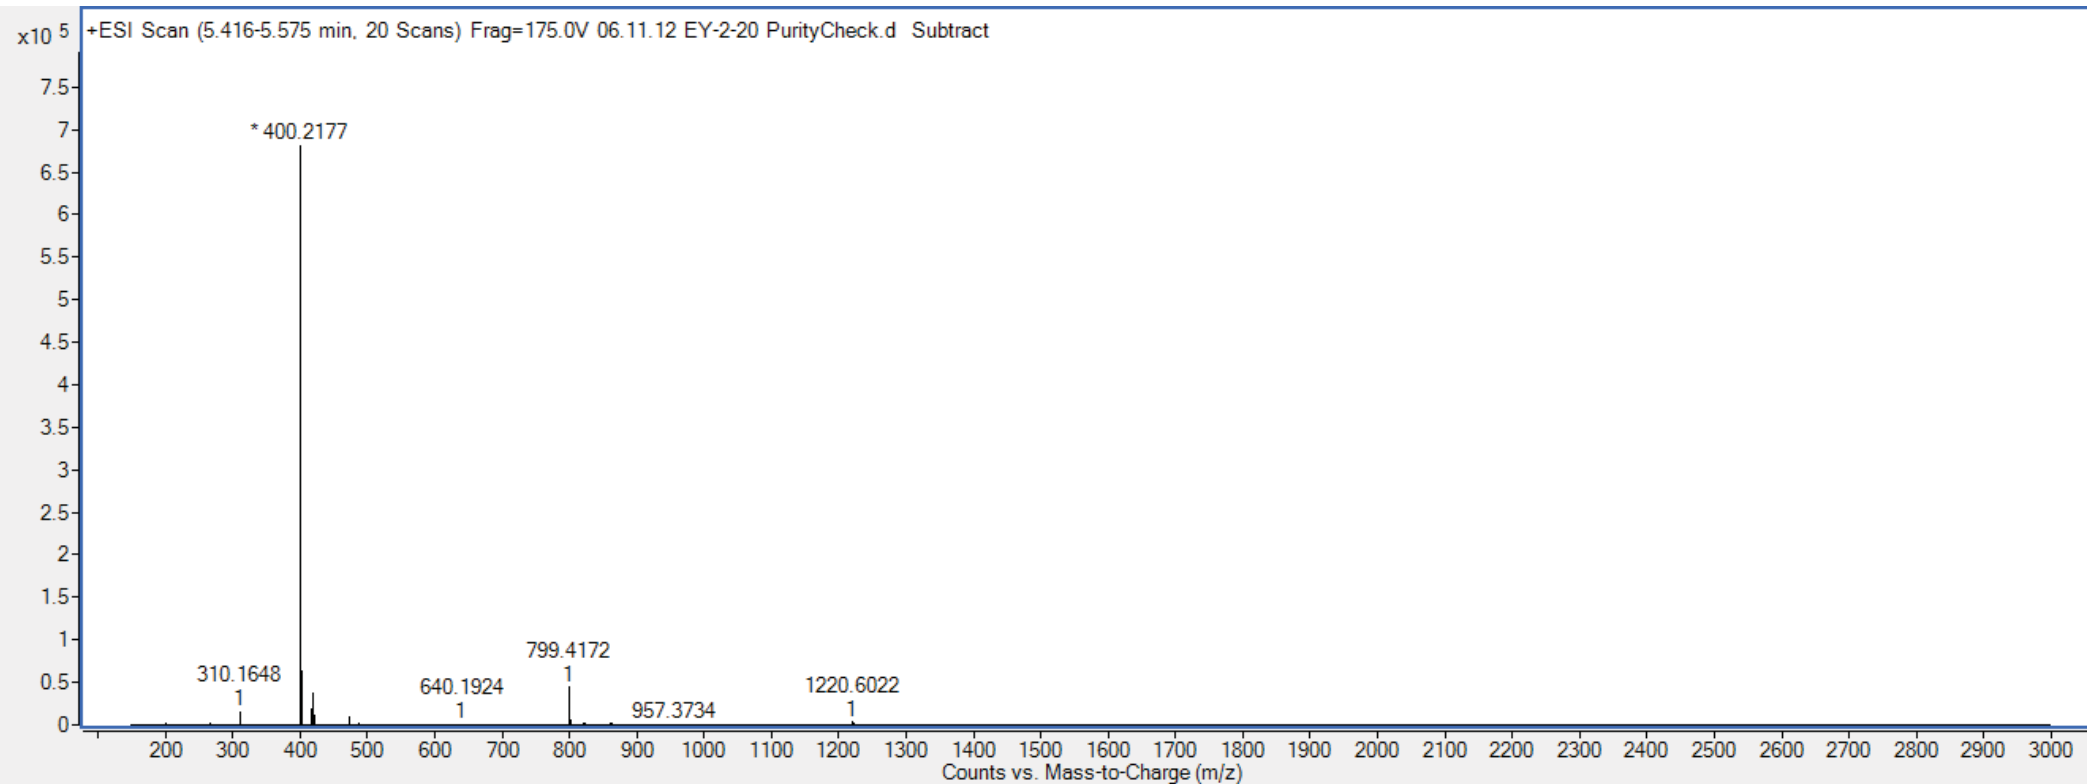



# 20d <sup>1</sup>H NMR

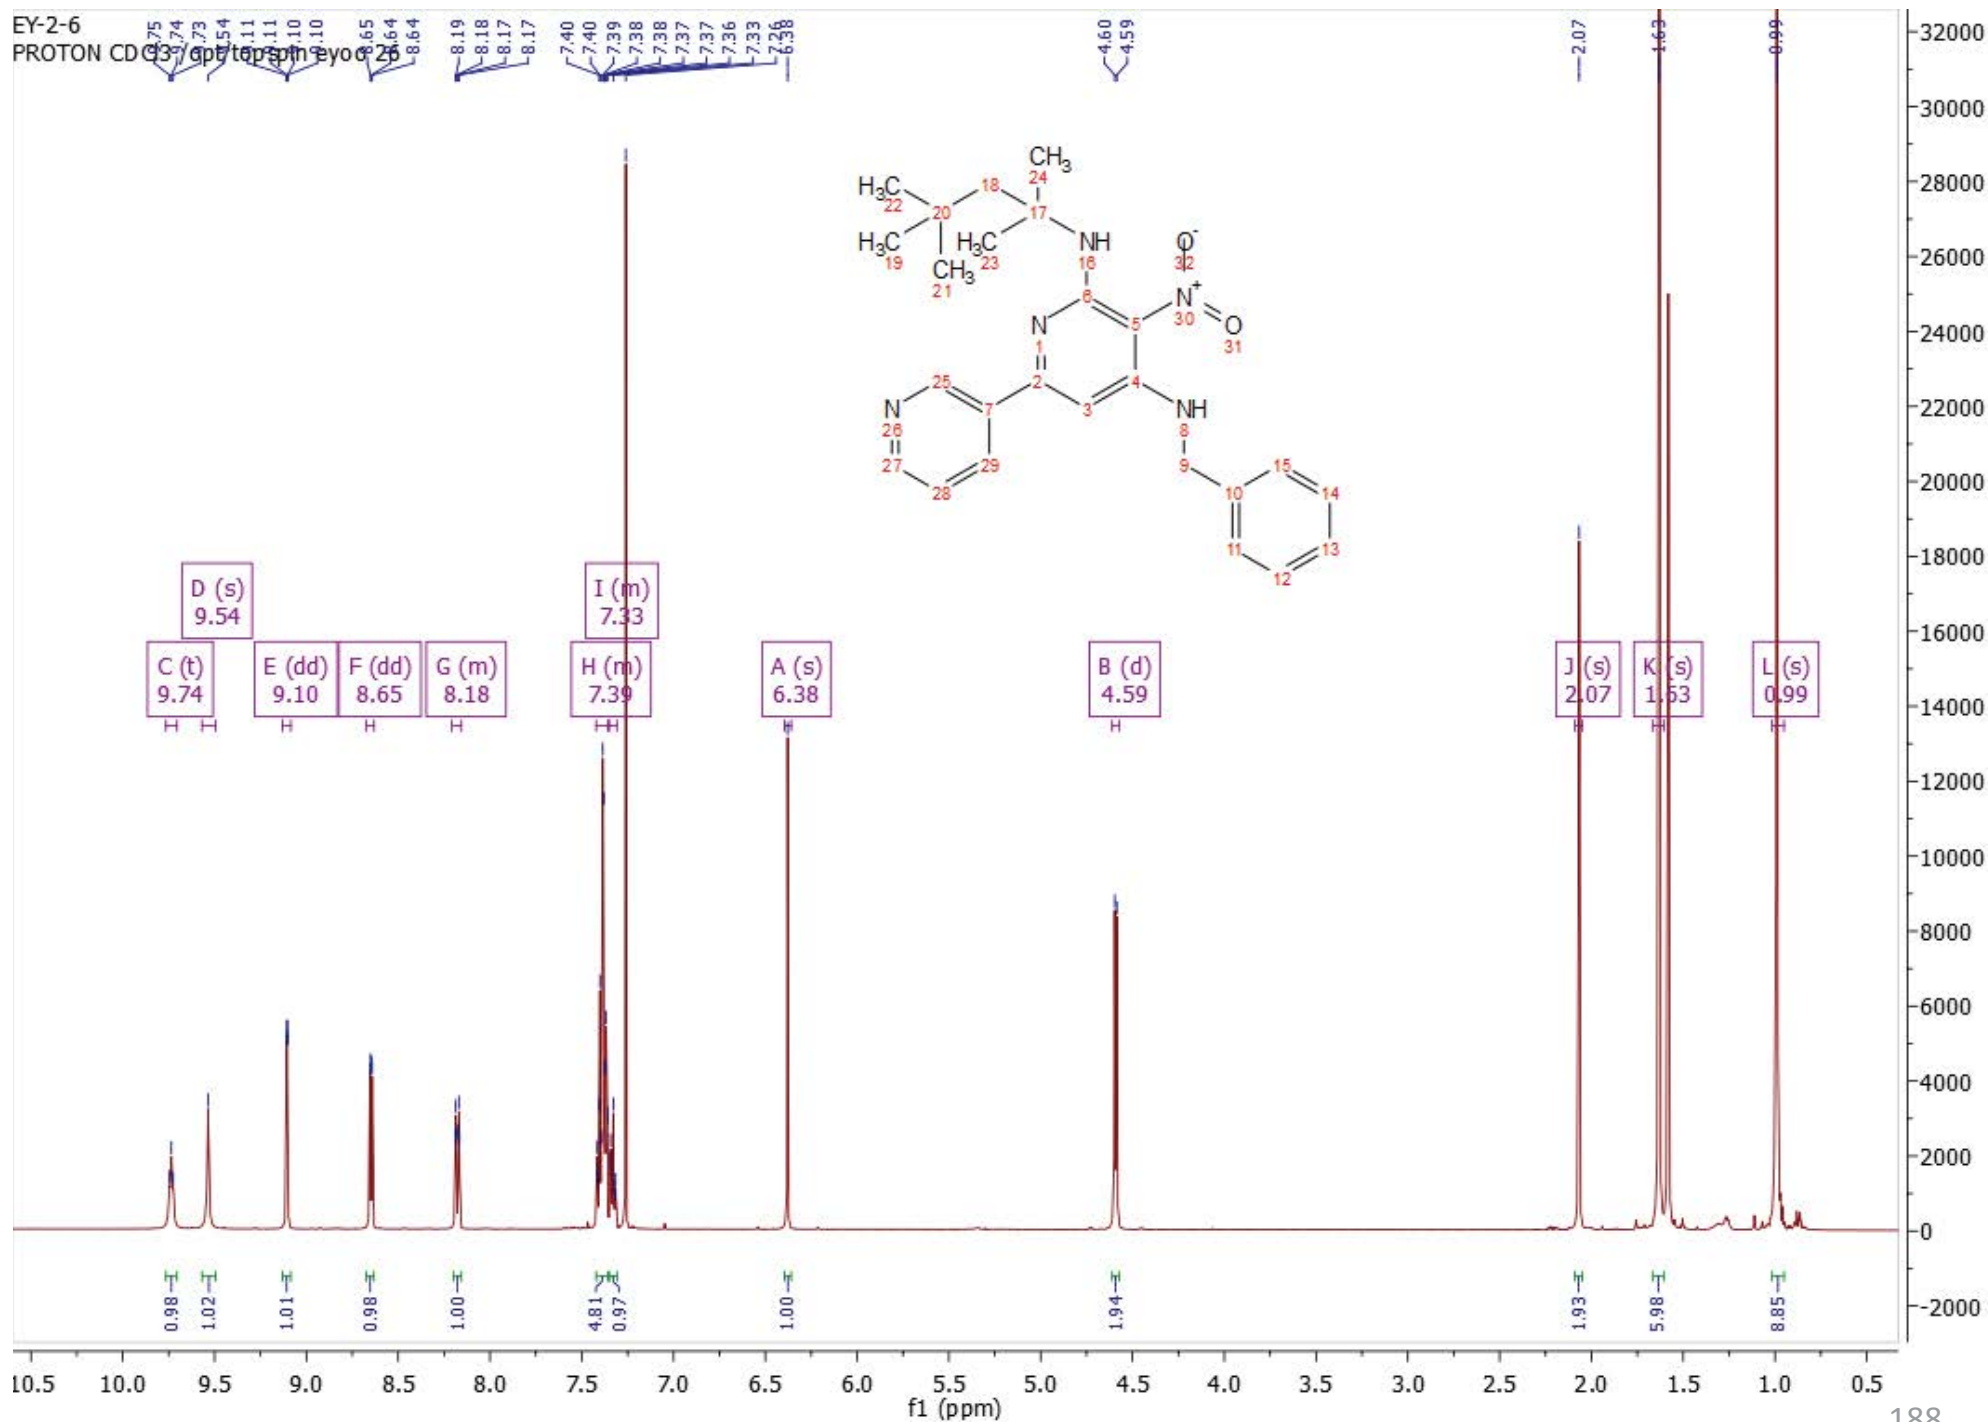

# 20d <sup>13</sup>C NMR

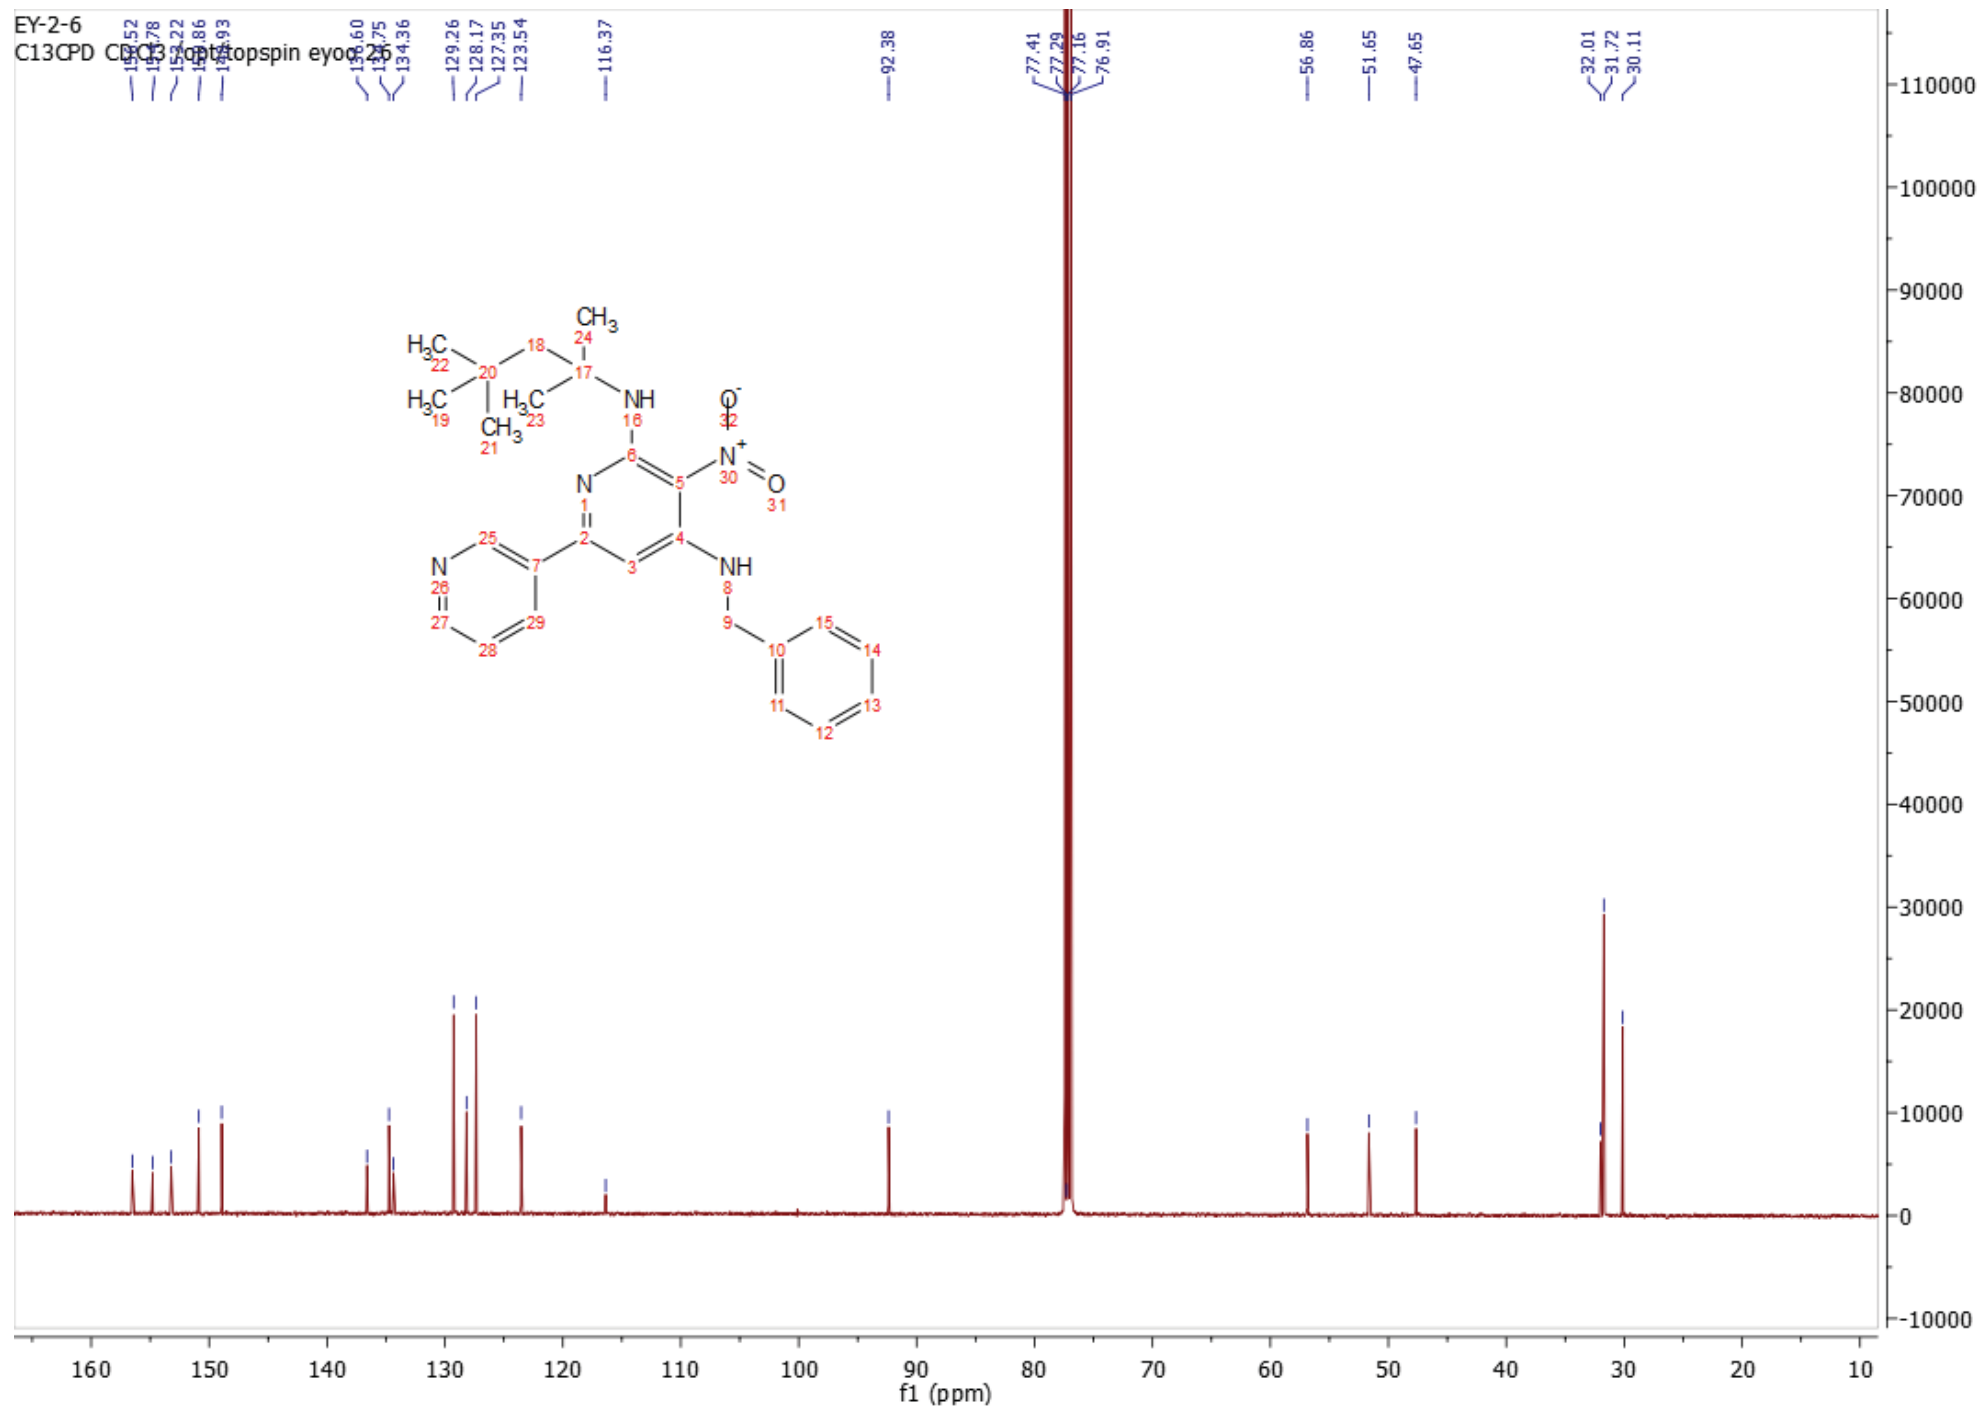

## 20d MS

|               |                   |             |                      |                 |              |                        |                       |
|---------------|-------------------|-------------|----------------------|-----------------|--------------|------------------------|-----------------------|
| Sample Name   | 04.26.12 EY-2-6   | Position    | Vial 1               | Instrument Name | Instrument 1 | User Name              |                       |
| Inj Vol       | -1                | InjPosition |                      | SampleType      | Sample       | IRM Calibration Status | Success               |
| Data Filename | 04.26.12 EY-2-6.d | ACQ Method  | Water-ACN Infusion M | Comment         |              | Acquired Time          | 4/26/2012 11:01:09 AM |

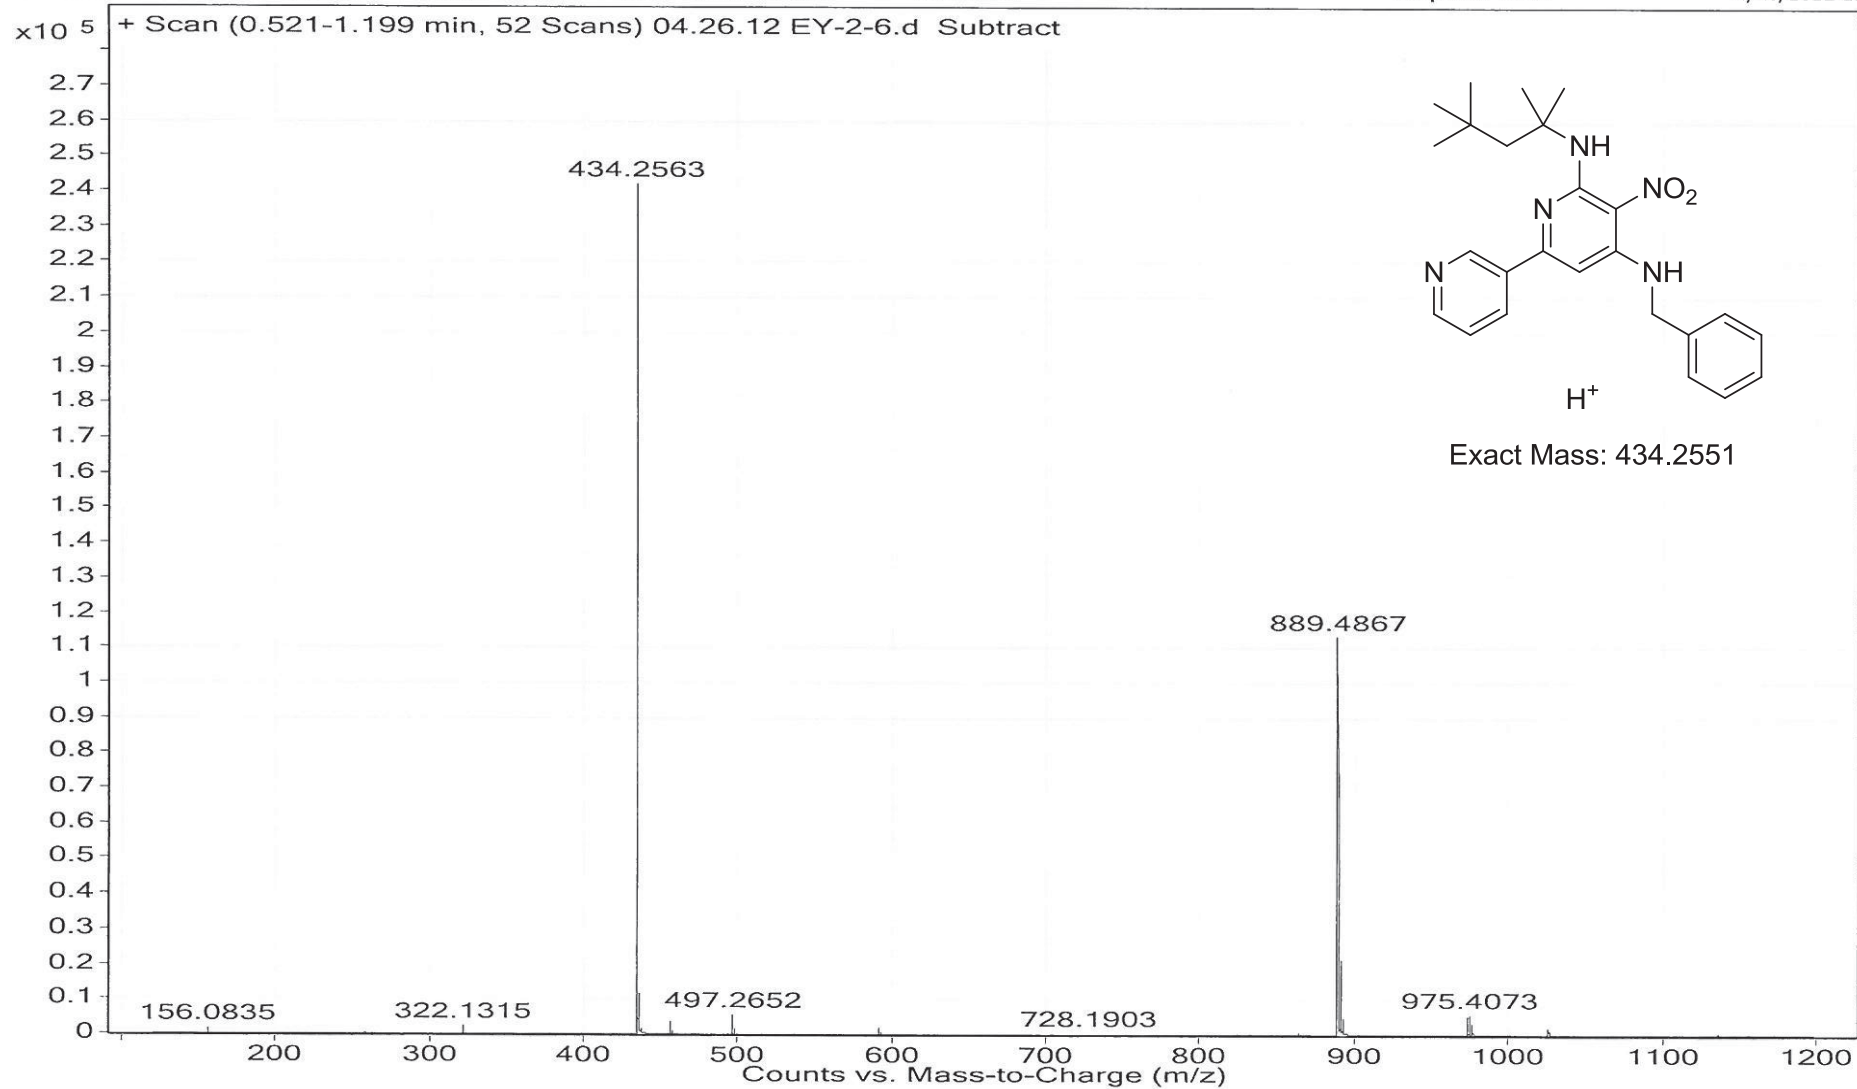

# 21d MS

|               |                   |             |                      |                 |              |                        |                      |
|---------------|-------------------|-------------|----------------------|-----------------|--------------|------------------------|----------------------|
| Sample Name   | 04.26.12 EY-2-7   | Position    | Vial 1               | Instrument Name | Instrument 1 | User Name              |                      |
| Inj Vol       | -1                | InjPosition |                      | SampleType      | Sample       | IRM Calibration Status | Success              |
| Data Filename | 04.26.12 EY-2-7.d | ACQ Method  | Water-ACN Infusion M | Comment         |              | Acquired Time          | 4/26/2012 1:11:22 PM |

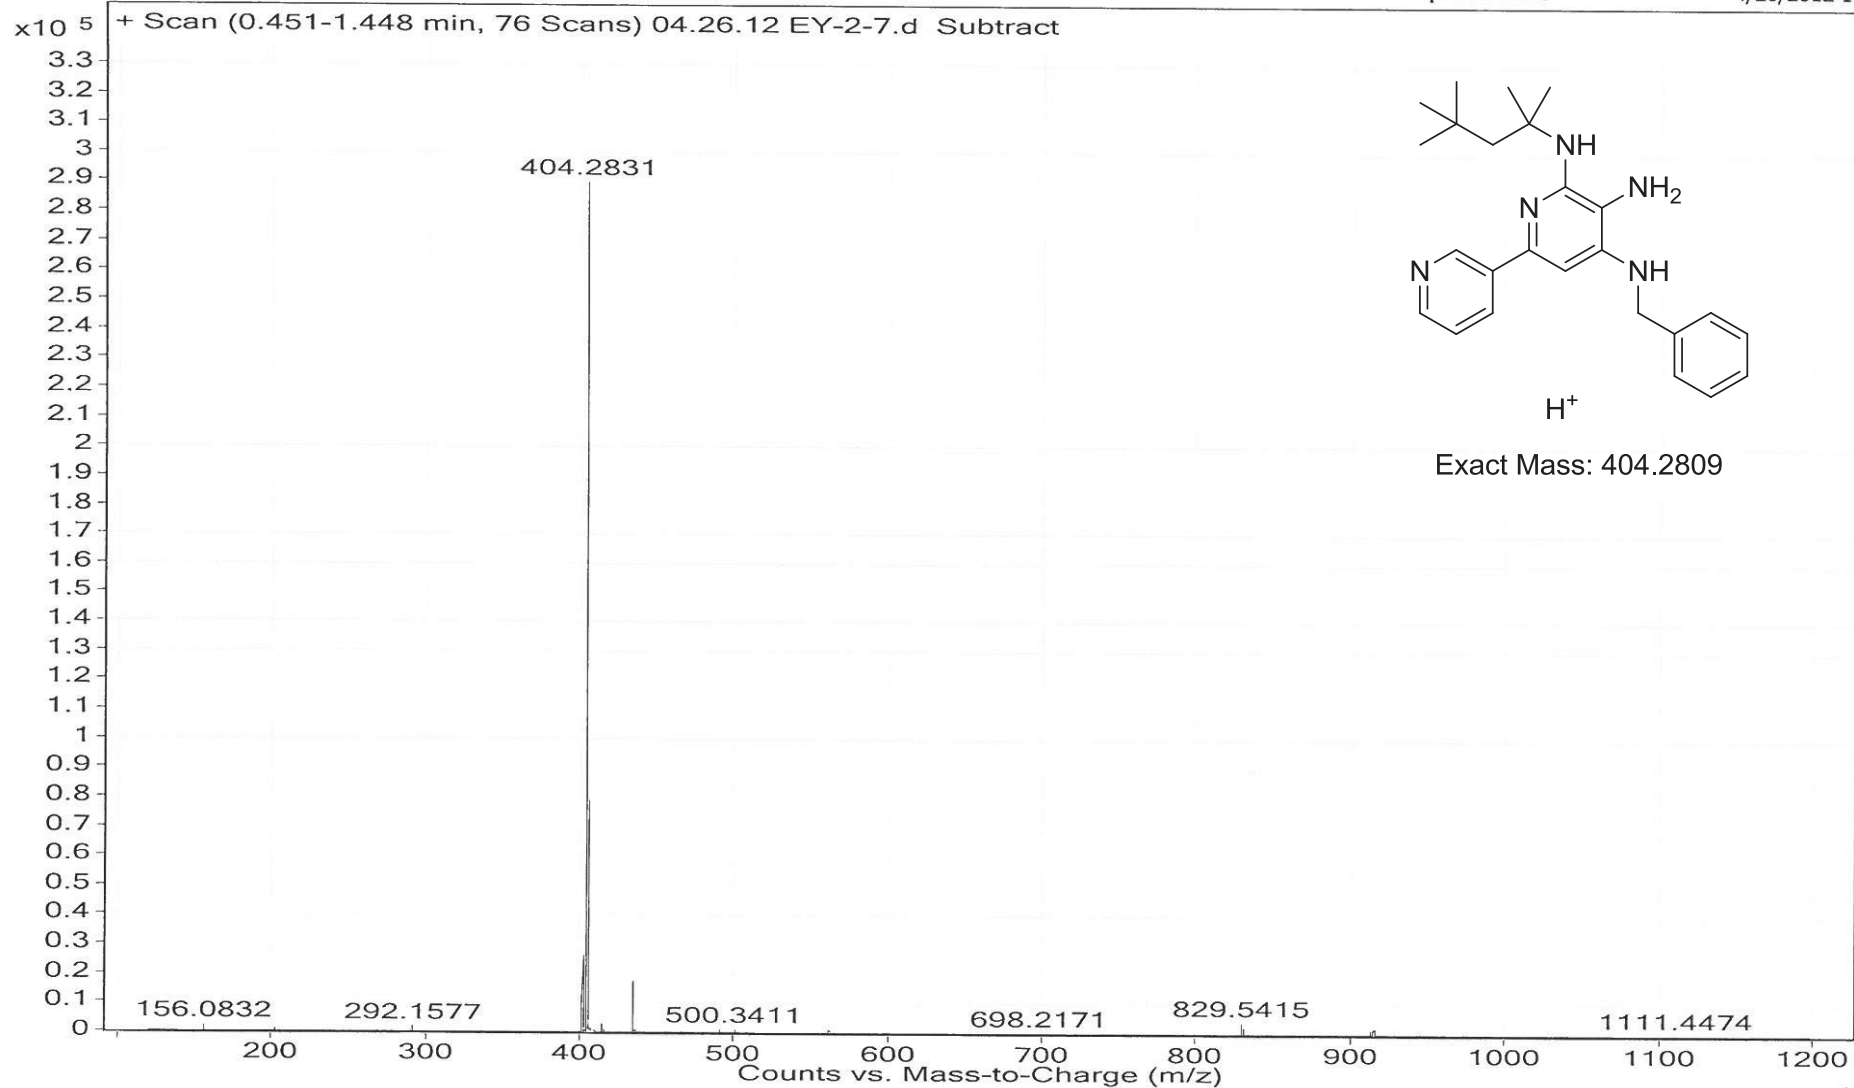

## 22d MS

|               |                      |             |                      |                 |              |                        |                       |
|---------------|----------------------|-------------|----------------------|-----------------|--------------|------------------------|-----------------------|
| Sample Name   | 04.27.12 EY-2-8 tube | Position    | Vial 1               | Instrument Name | Instrument 1 | User Name              |                       |
| Inj Vol       | -1                   | InjPosition |                      | SampleType      | Sample       | IRM Calibration Status | Success               |
| Data Filename | 04.27.12 EY-2-8 tube | ACQ Method  | Water-ACN Infusion M | Comment         |              | Acquired Time          | 4/27/2012 11:01:33 AM |

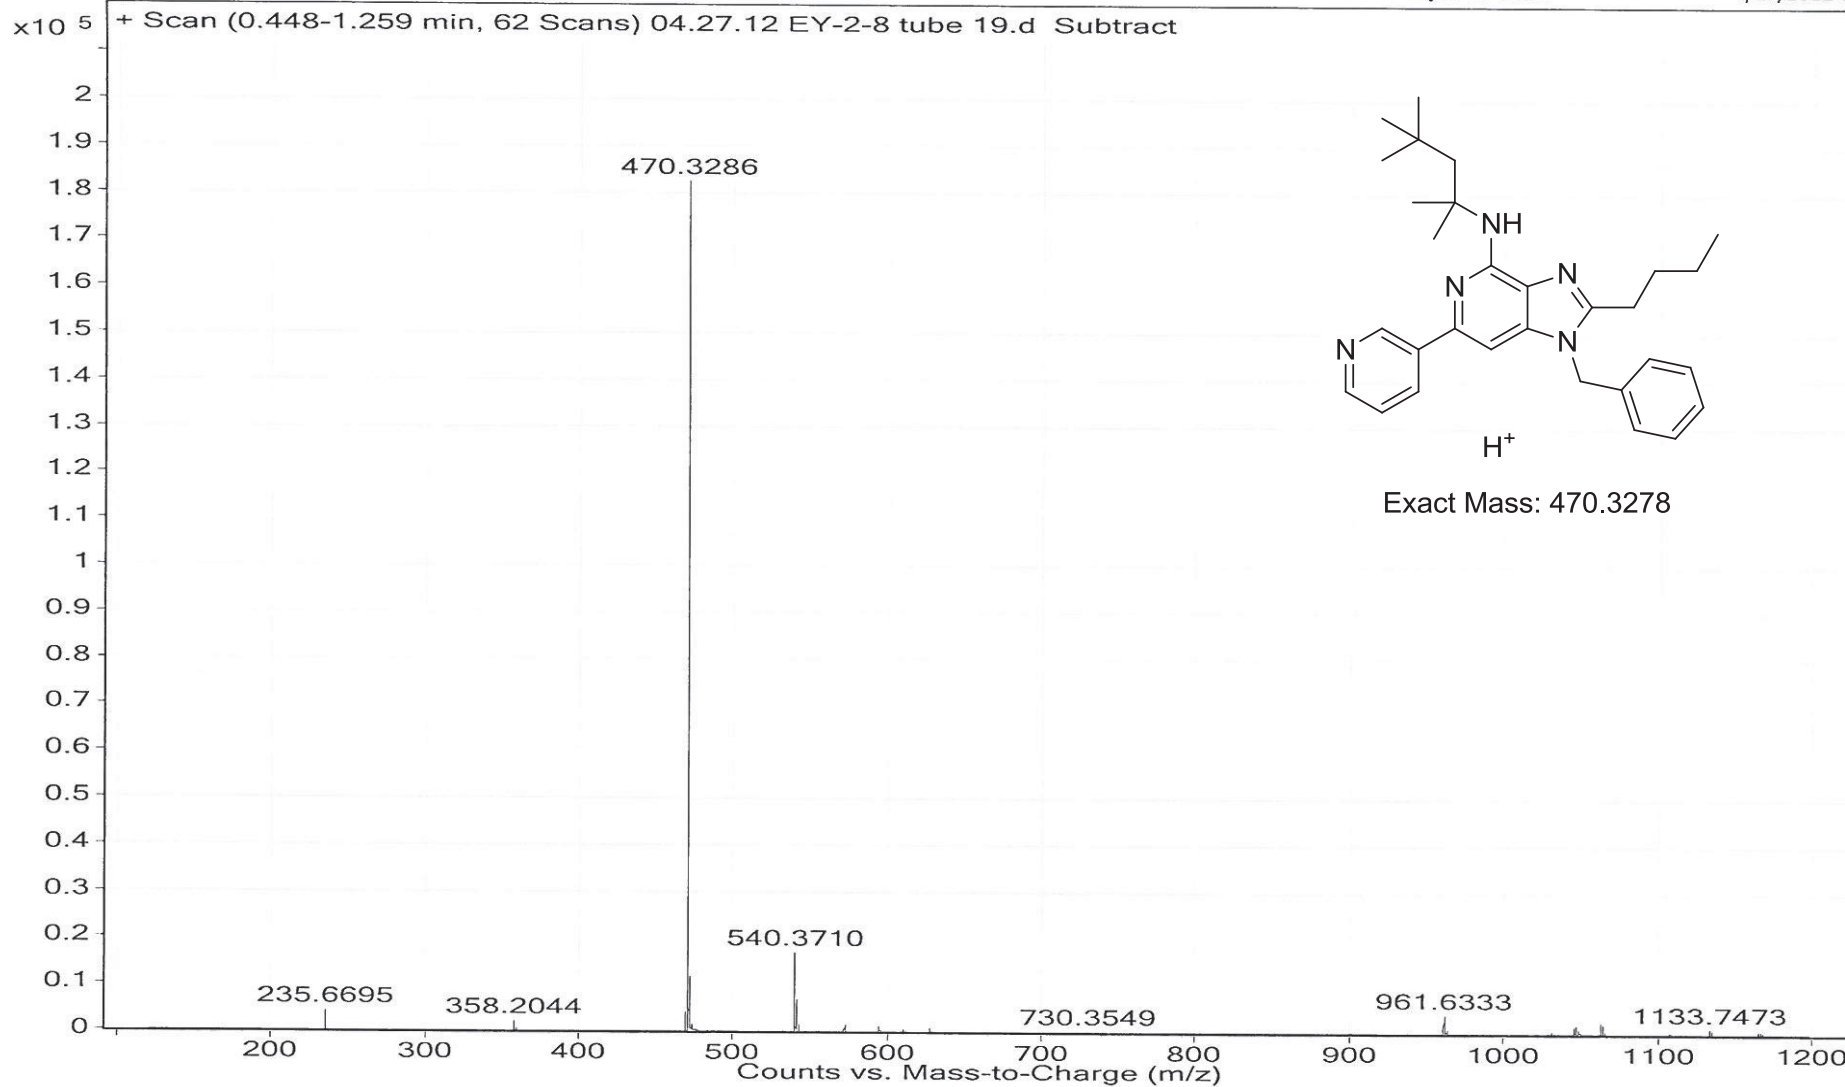

# 23d <sup>1</sup>H NMR

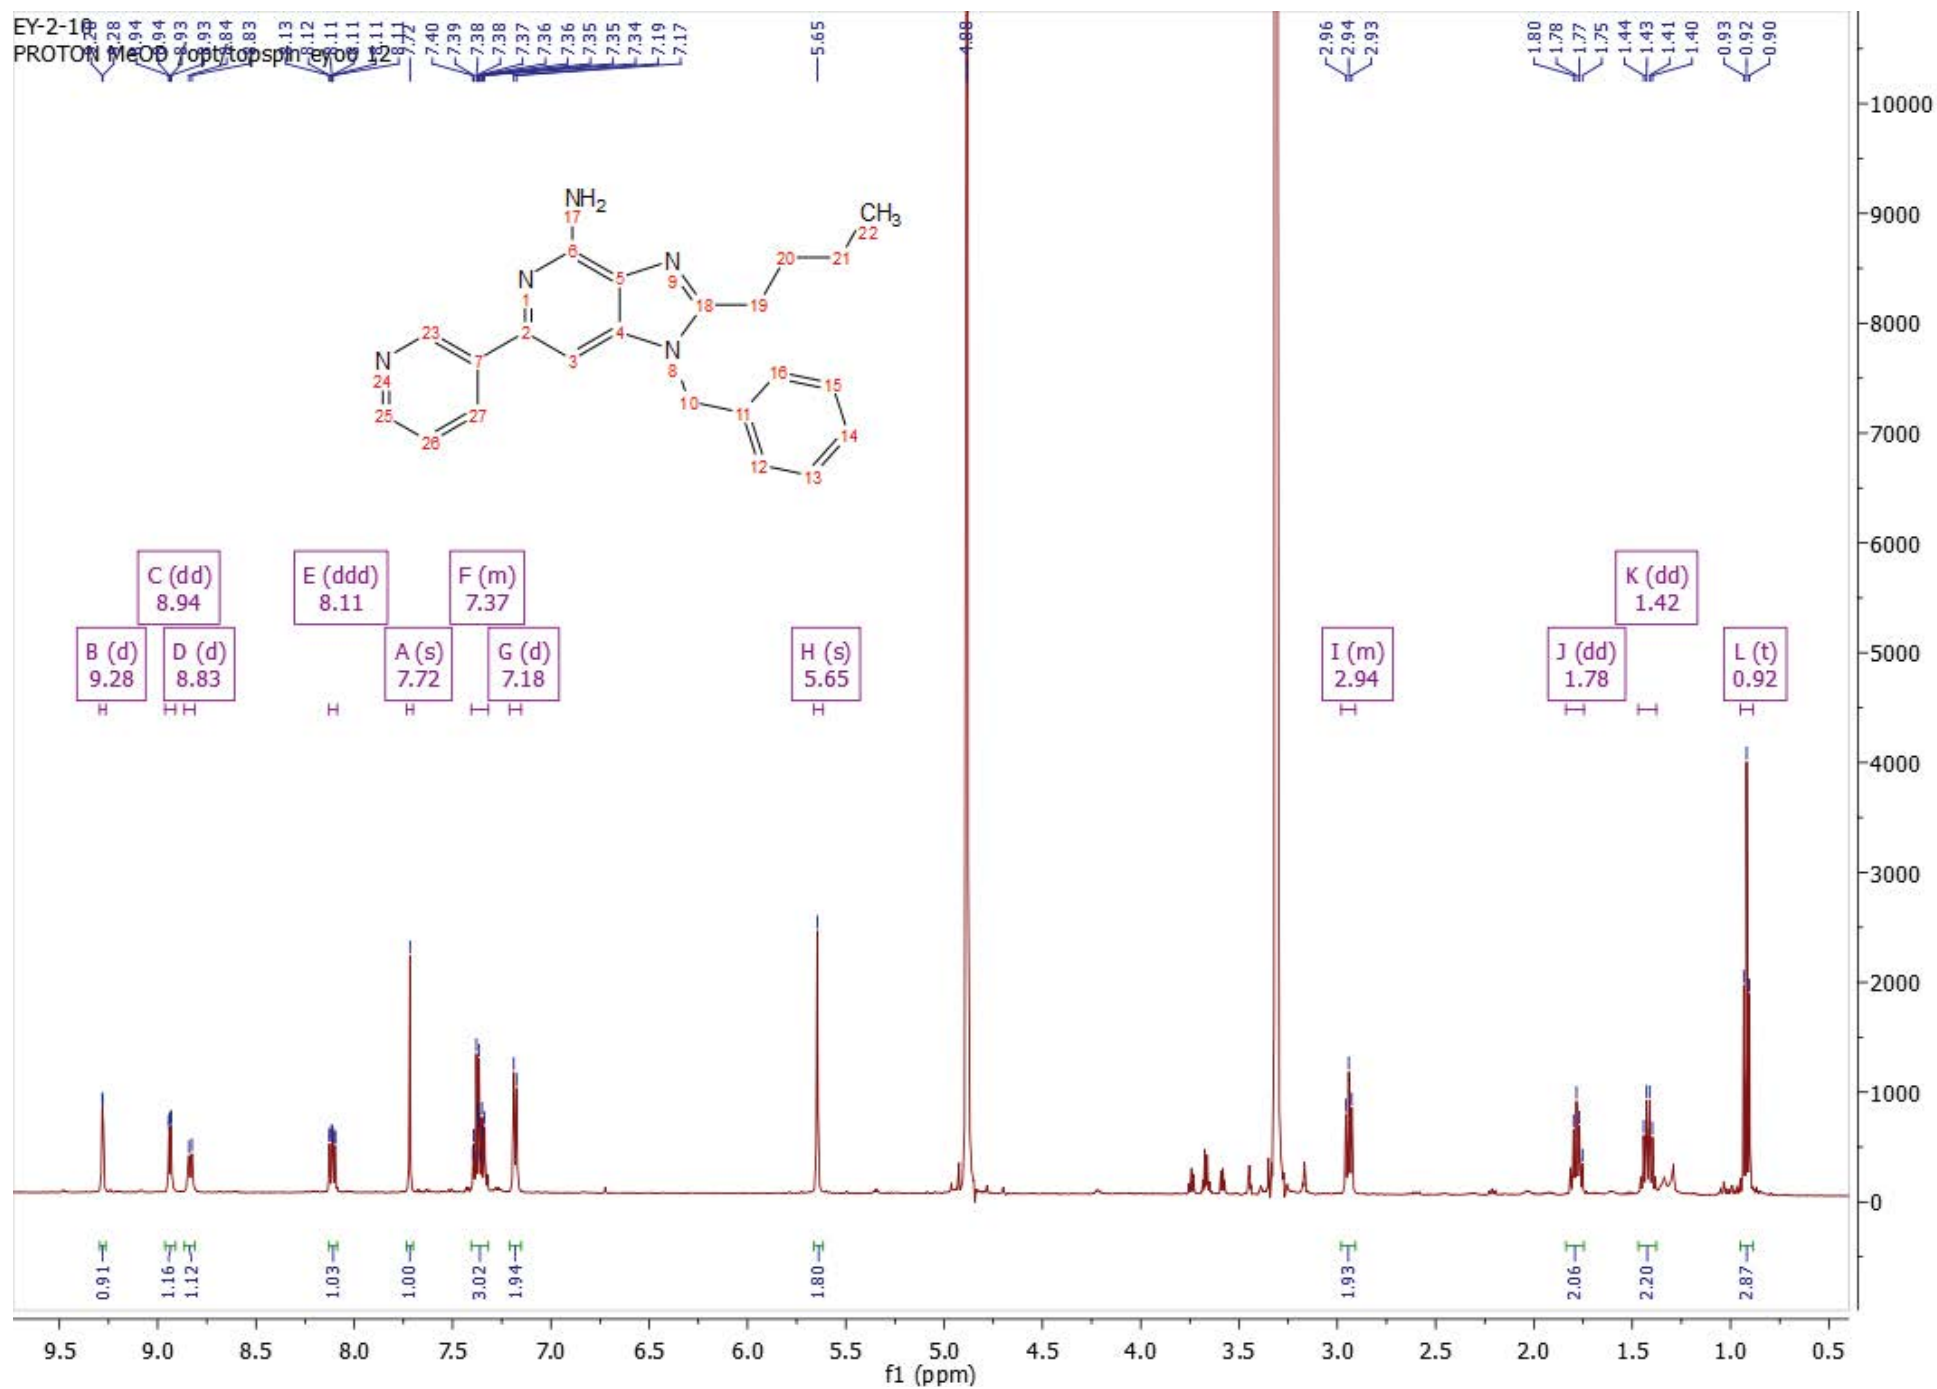

# 23d <sup>13</sup>C NMR

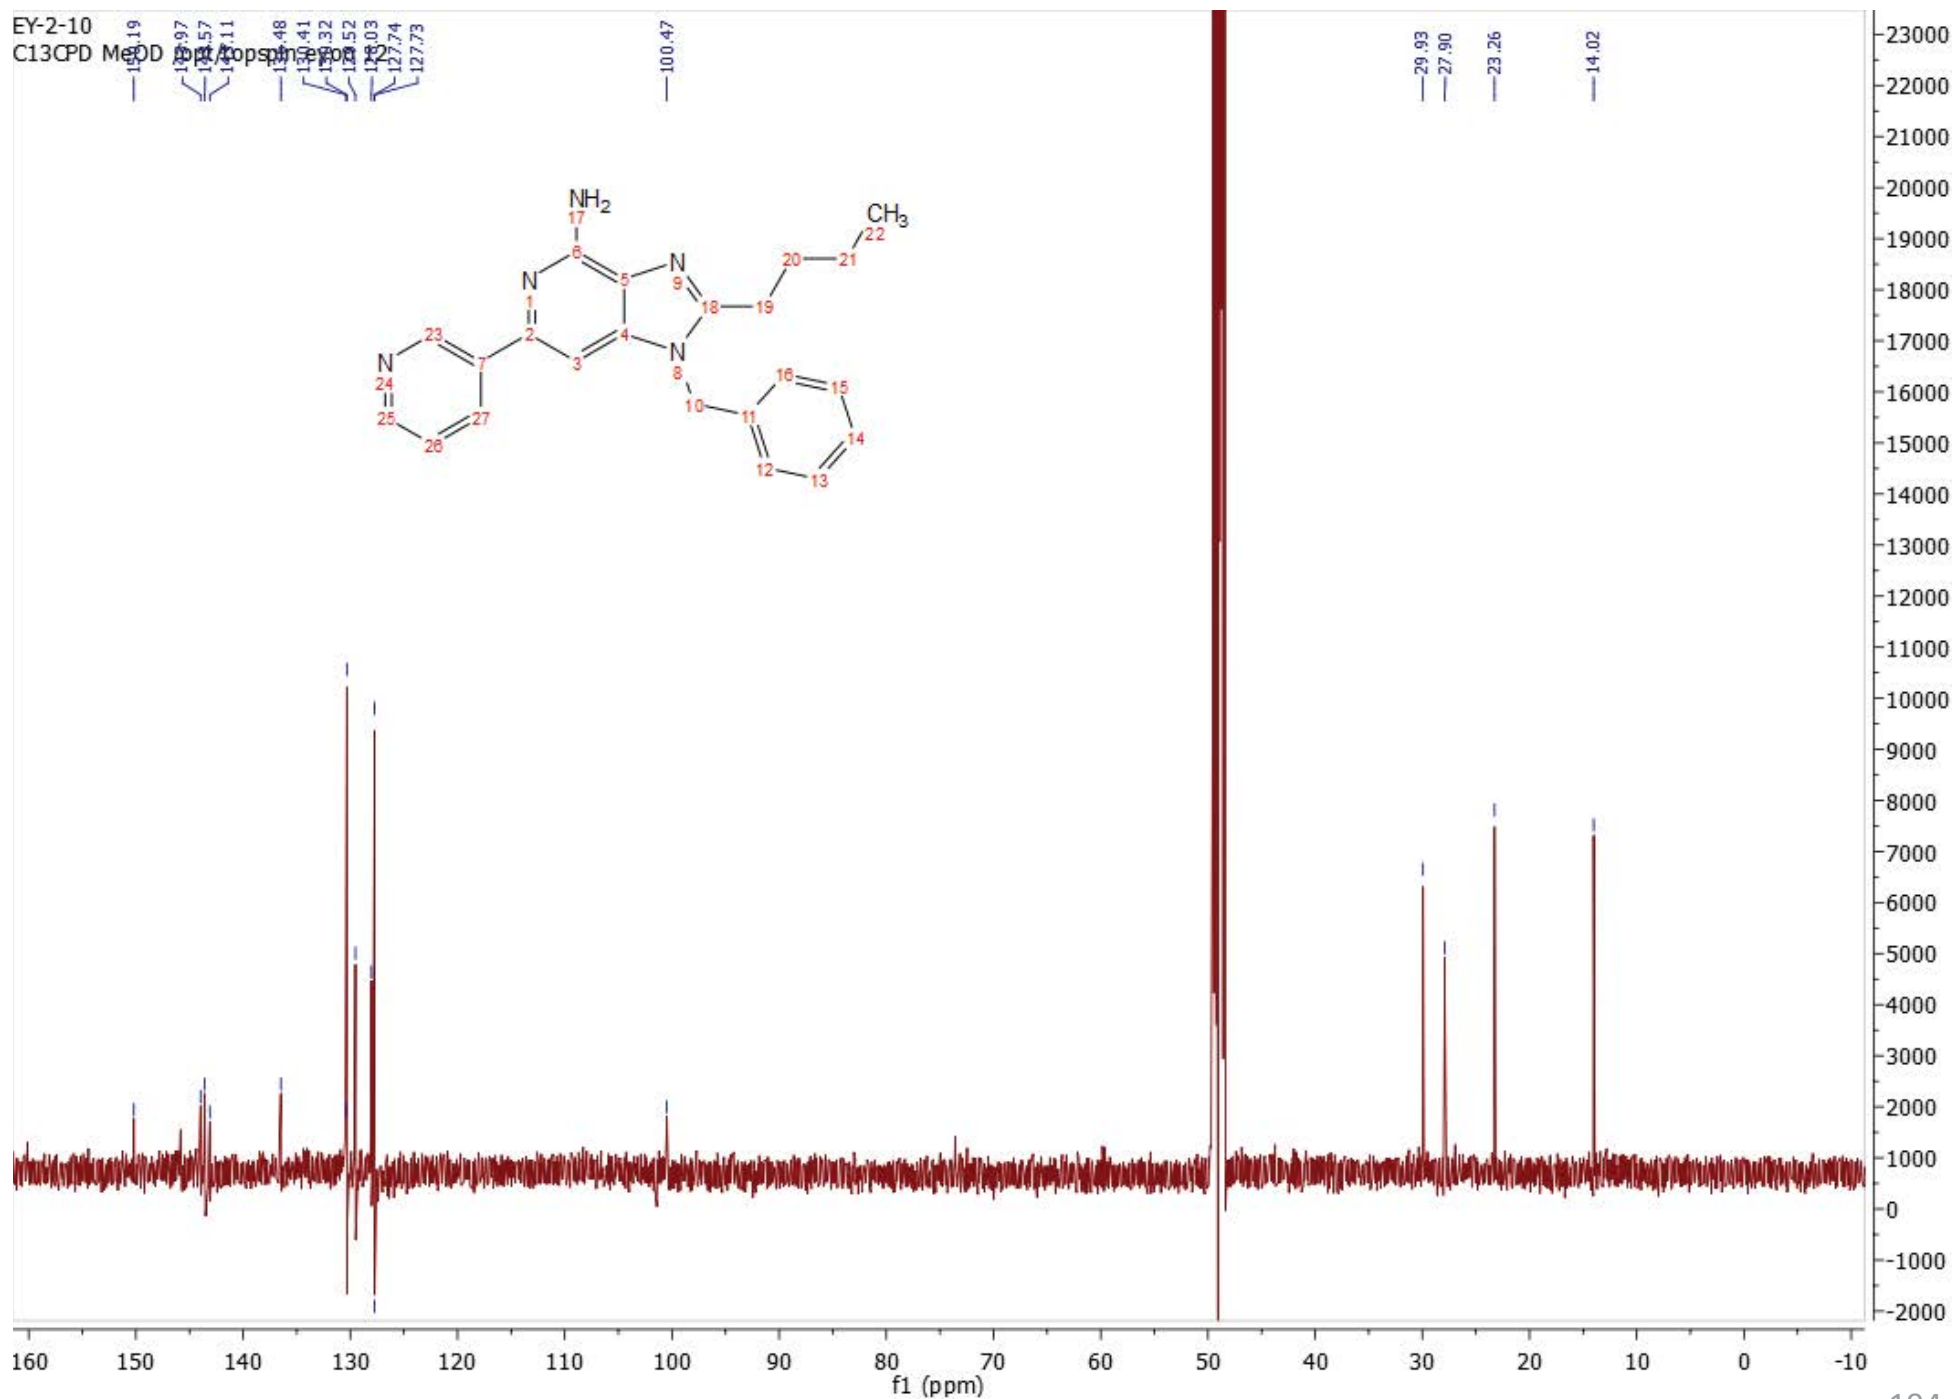



# 23d MS

|               |                    |             |                      |                 |              |                        |                       |
|---------------|--------------------|-------------|----------------------|-----------------|--------------|------------------------|-----------------------|
| Sample Name   | 04.27.12 EY-2-10   | Position    | Vial 1               | Instrument Name | Instrument 1 | User Name              |                       |
| Inj Vol       | -1                 | InjPosition |                      | SampleType      | Sample       | IRM Calibration Status | Success               |
| Data Filename | 04.27.12 EY-2-10.d | ACQ Method  | Water-ACN Infusion M | Comment         |              | Acquired Time          | 4/27/2012 12:49:58 PM |

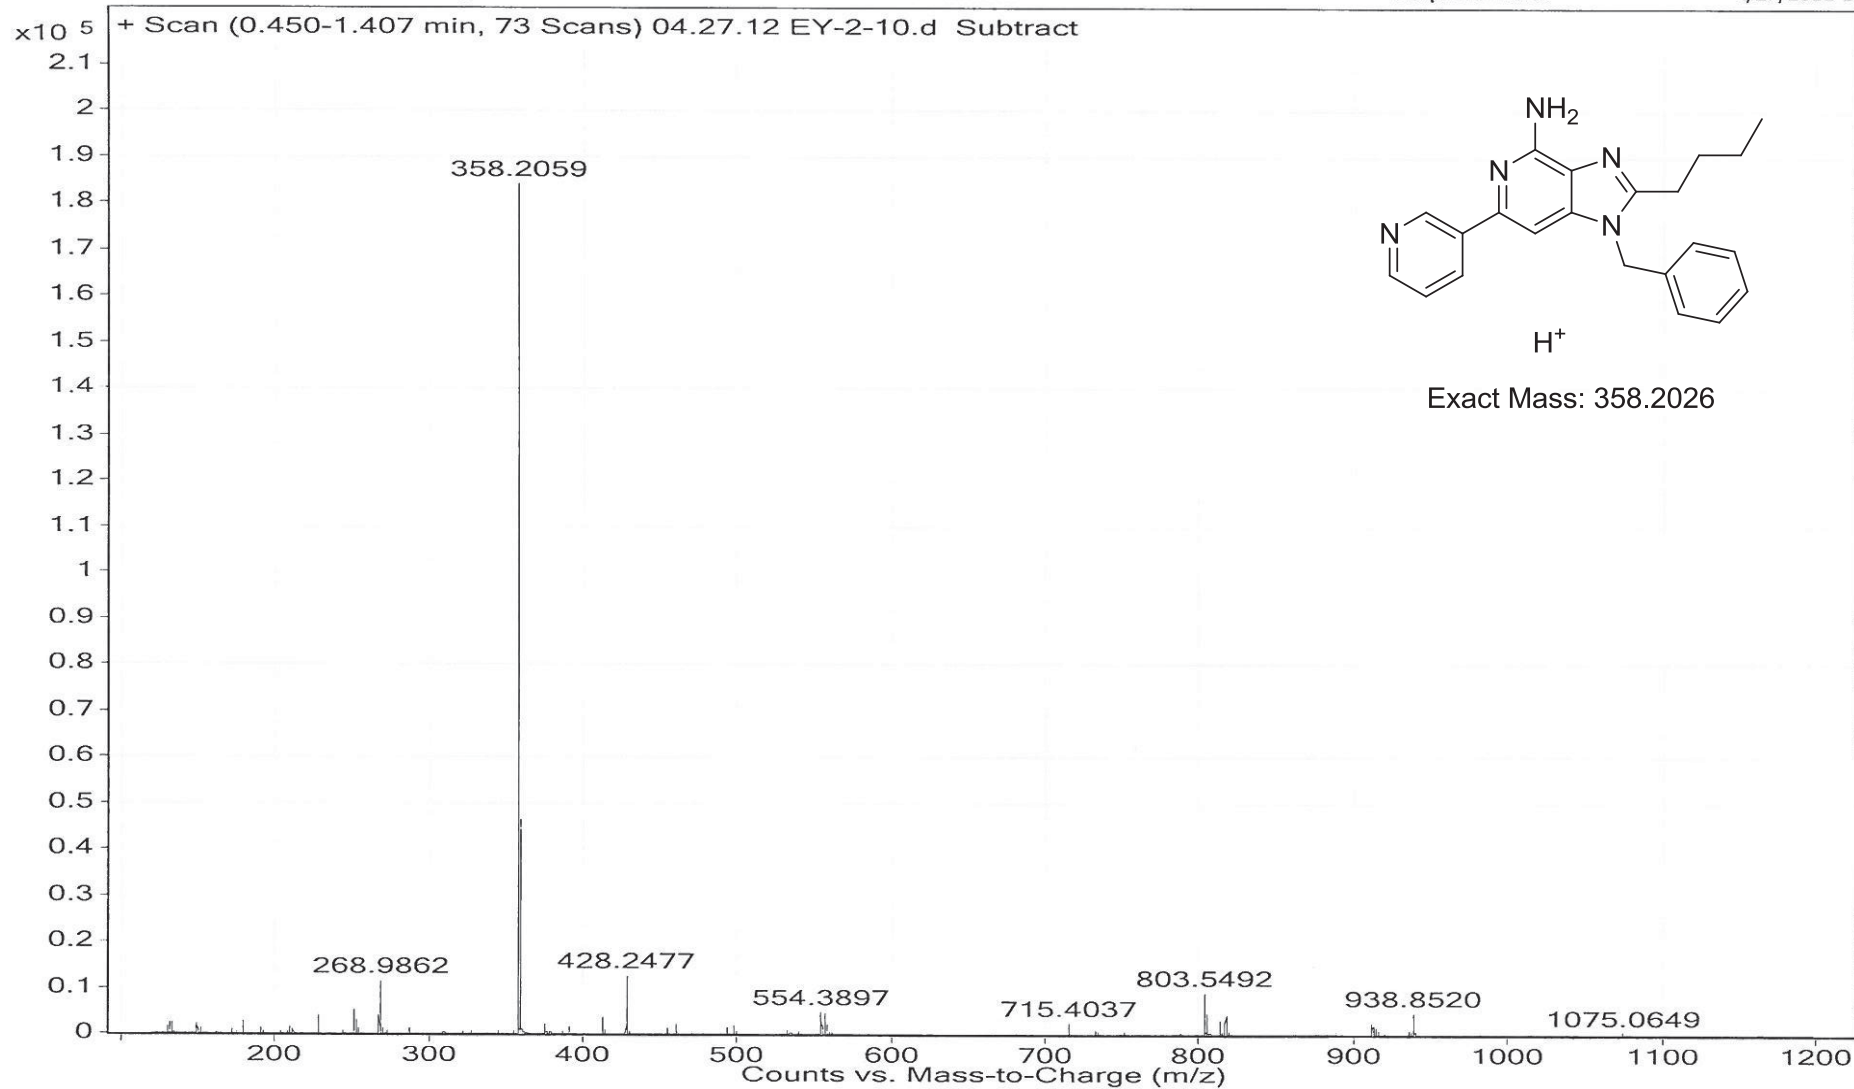

## 23d LC-MS

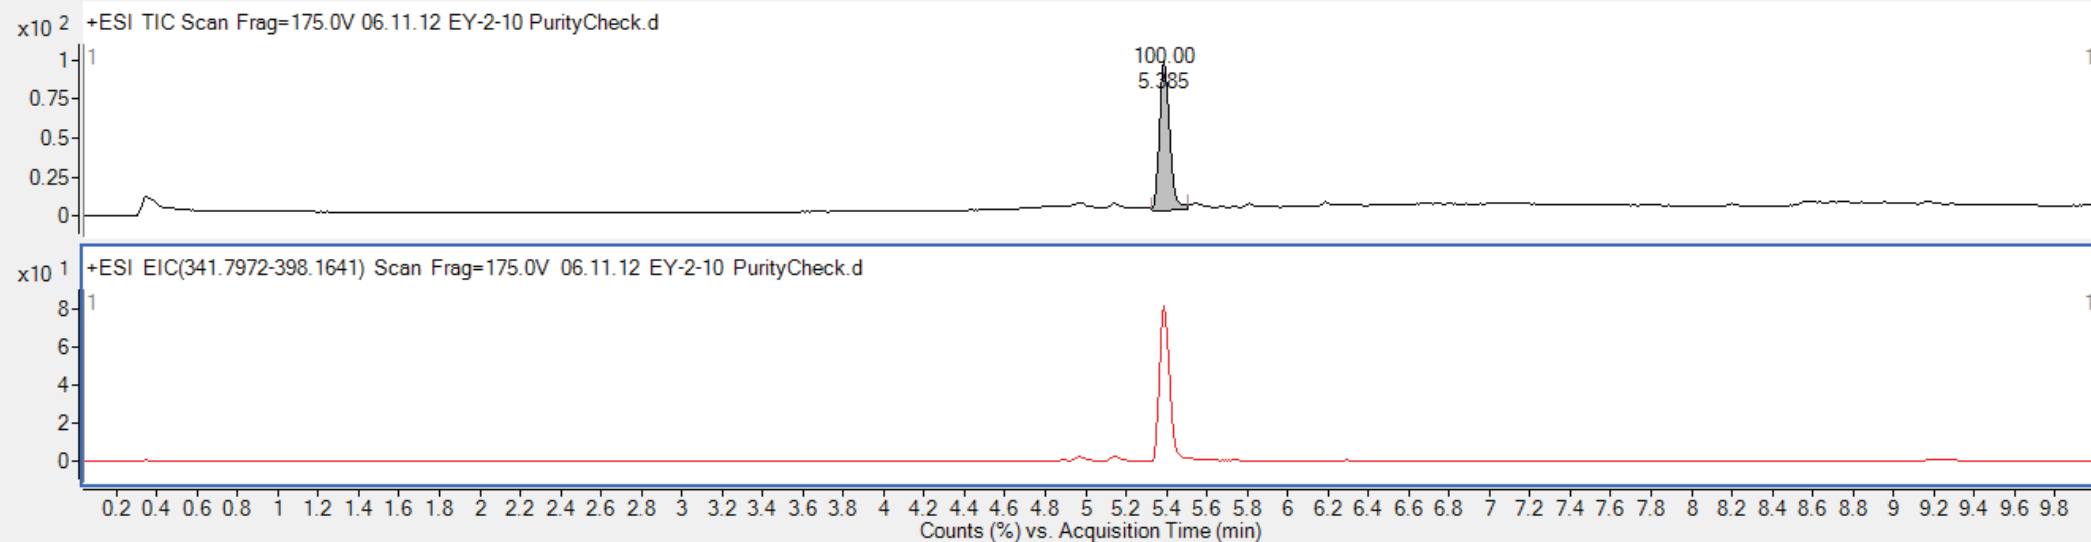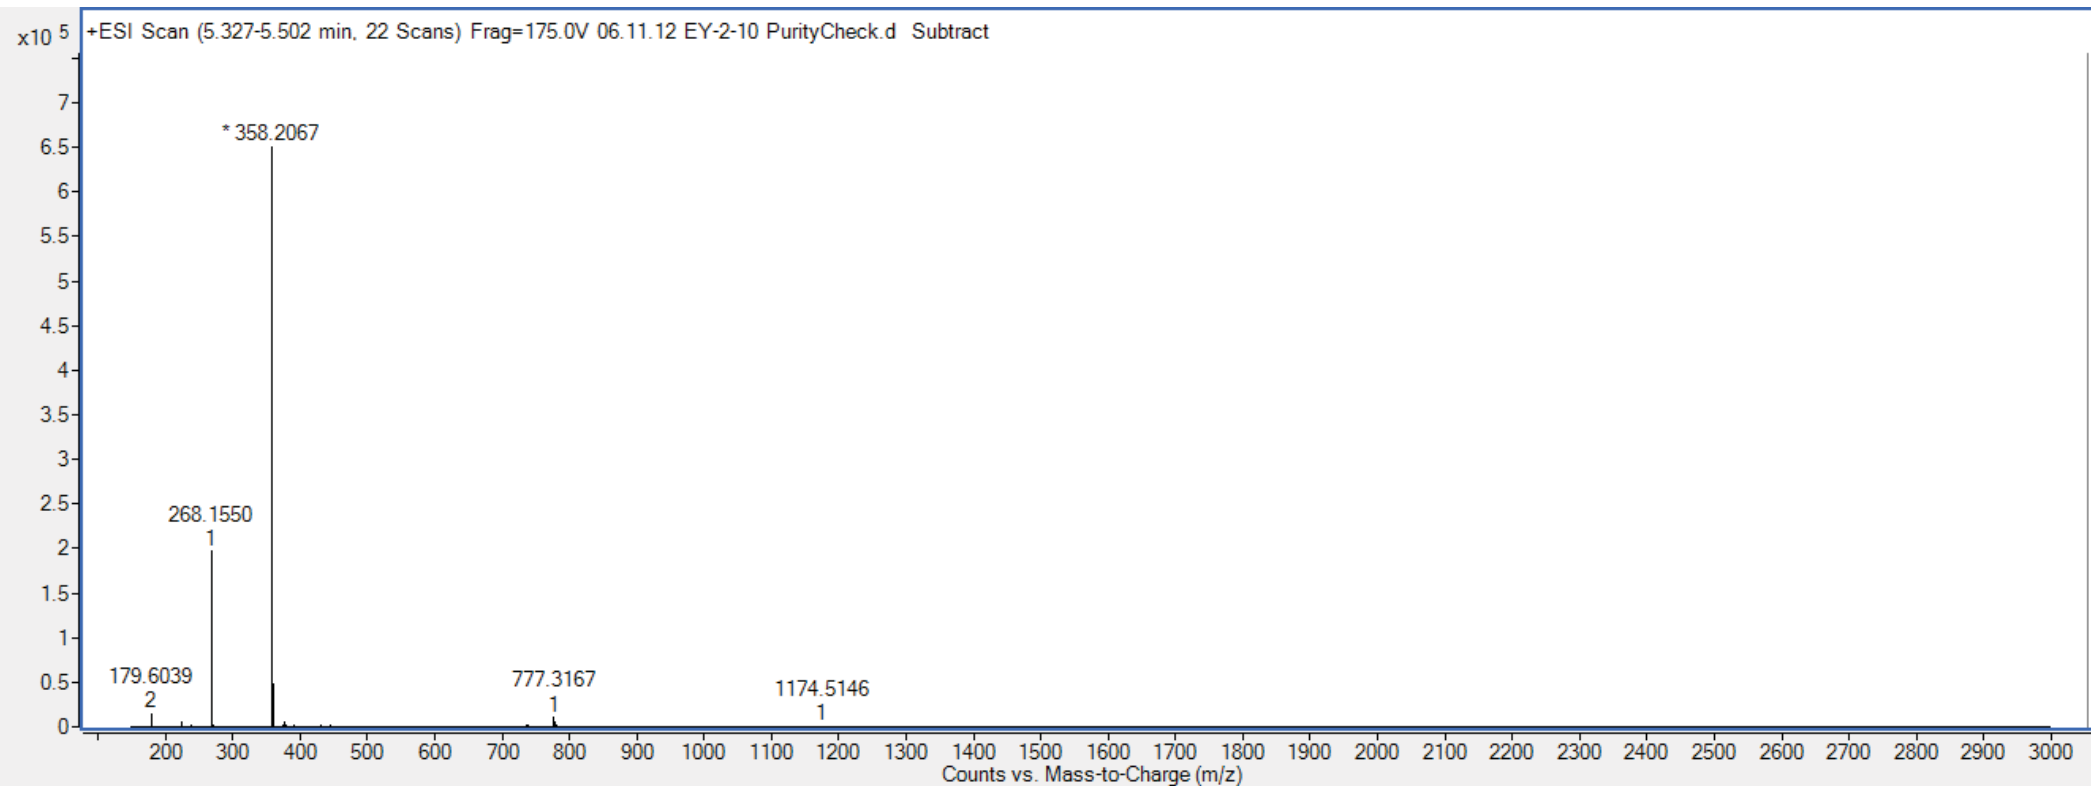

# 20e <sup>1</sup>H NMR

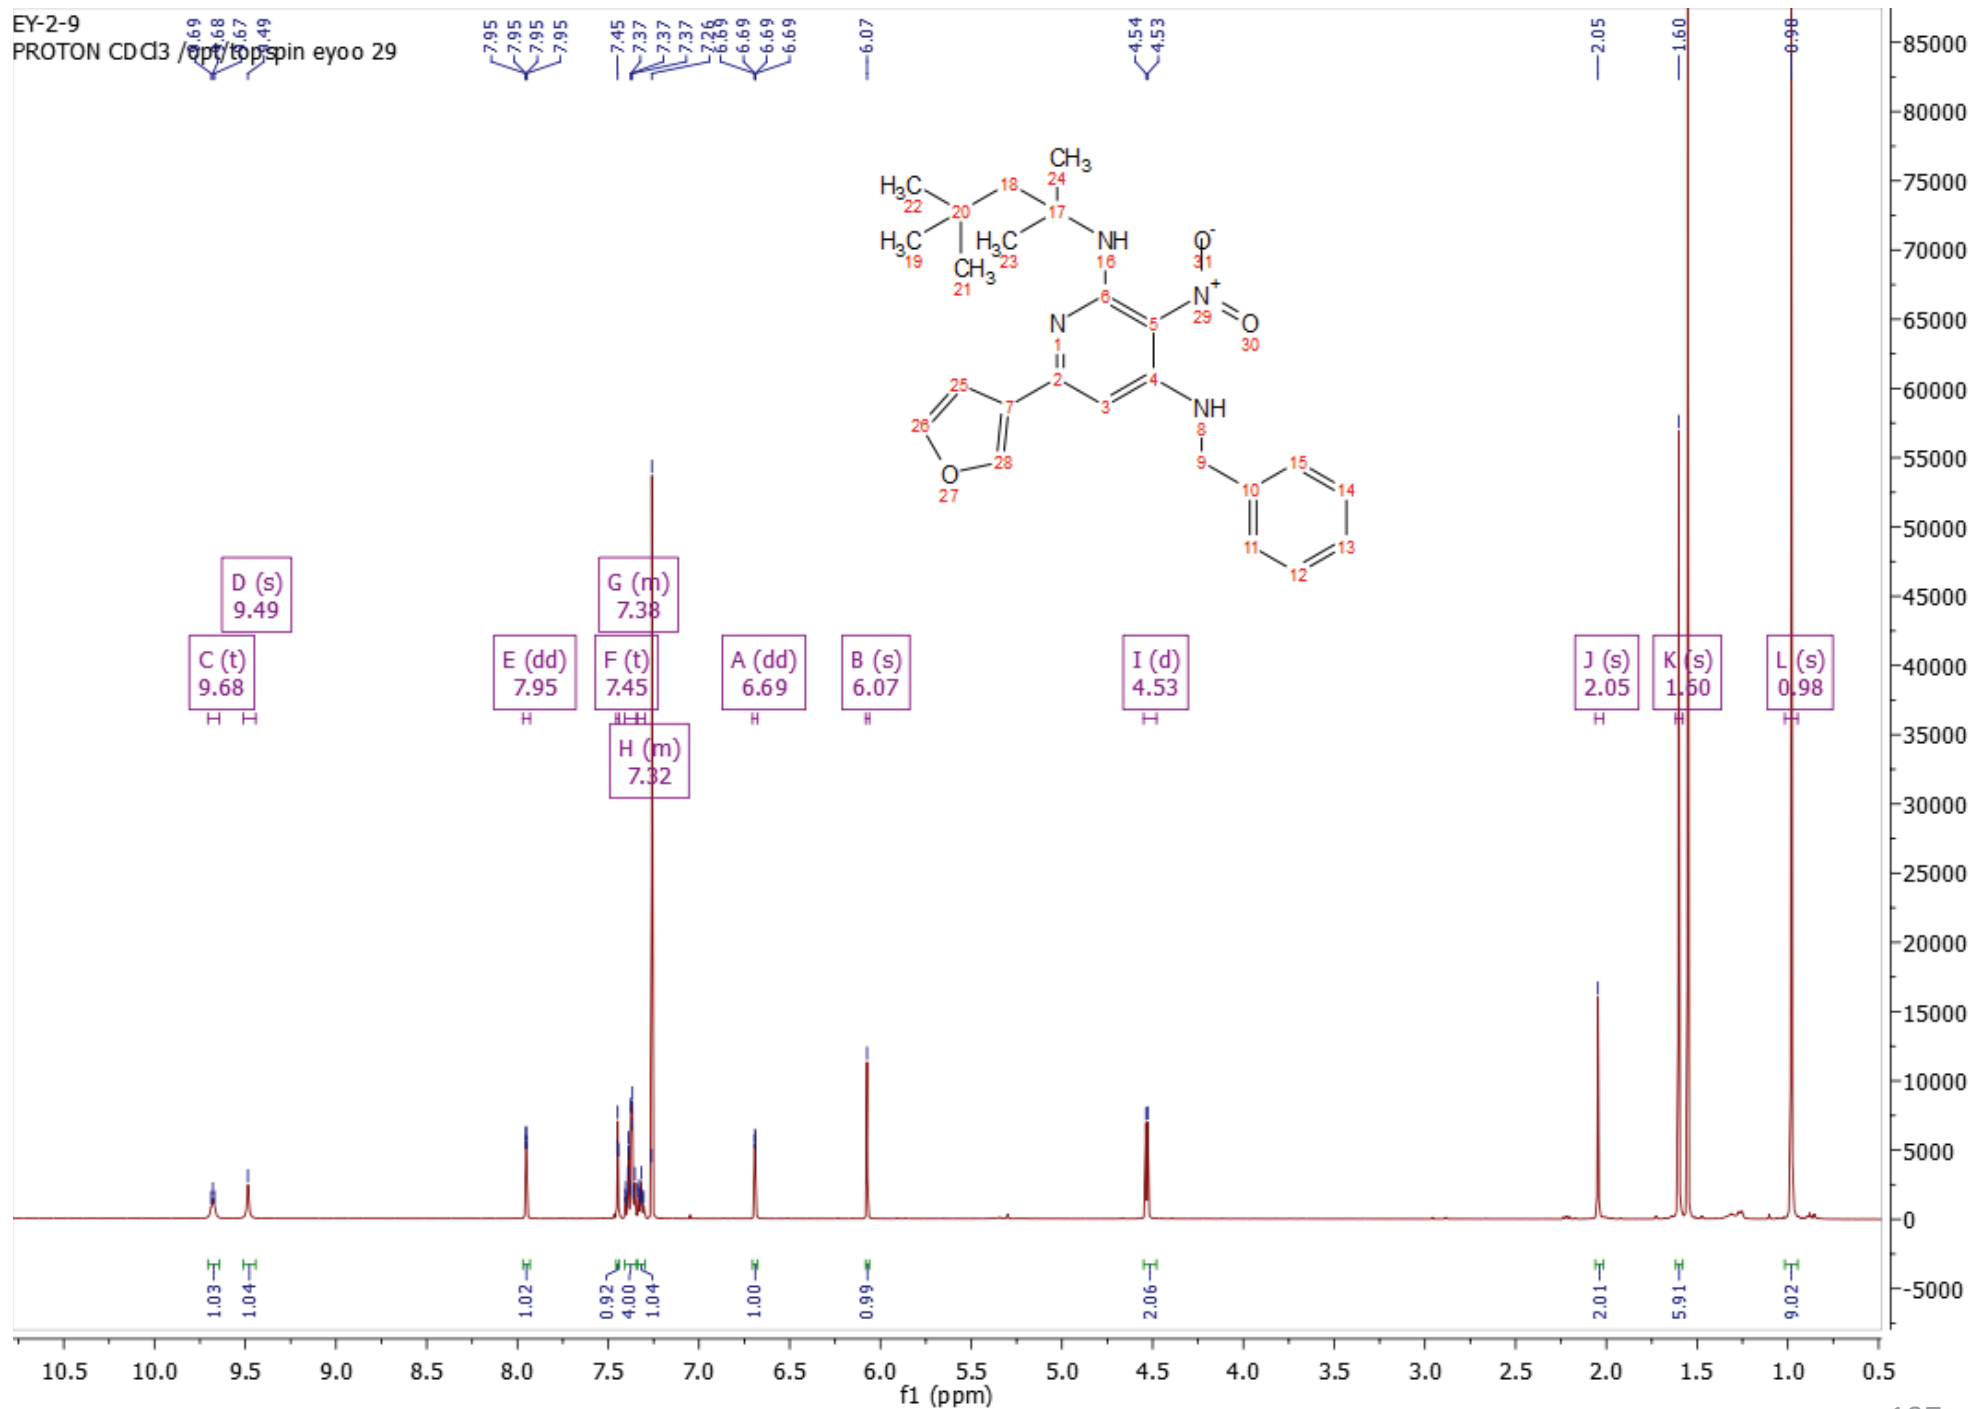

# 20e <sup>13</sup>C NMR

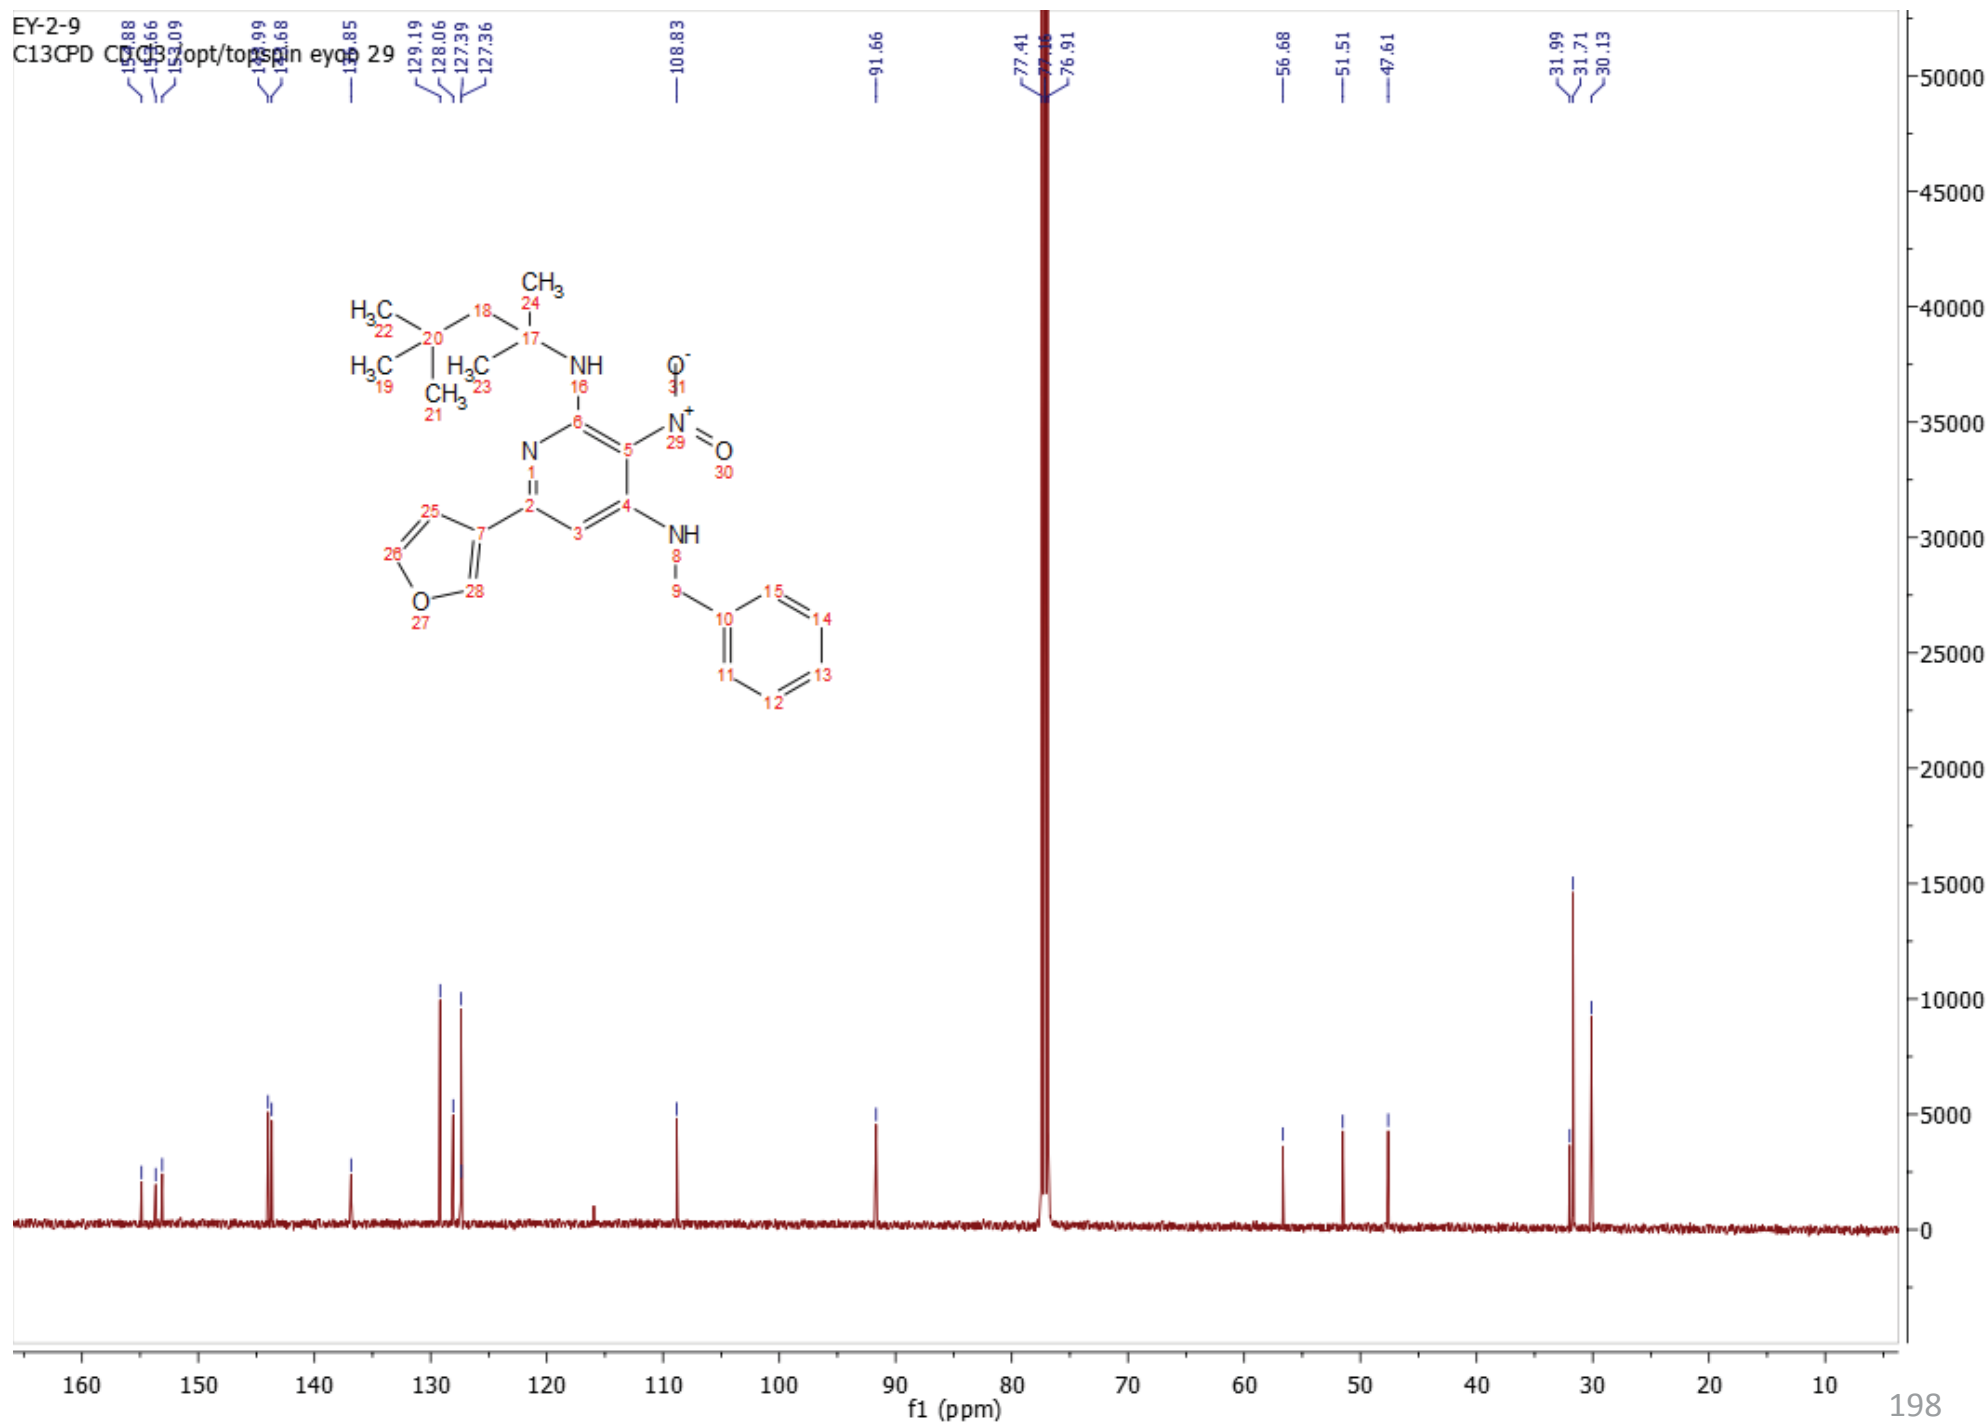

## 20e MS

|               |                      |             |                      |                 |              |                        |                       |
|---------------|----------------------|-------------|----------------------|-----------------|--------------|------------------------|-----------------------|
| Sample Name   | 04.27.12 EY-2-9 tube | Position    | Vial 1               | Instrument Name | Instrument 1 | User Name              |                       |
| Inj Vol       | -1                   | InjPosition |                      | SampleType      | Sample       | IRM Calibration Status | Success               |
| Data Filename | 04.27.12 EY-2-9 tube | ACQ Method  | Water-ACN Infusion M | Comment         |              | Acquired Time          | 4/27/2012 12:19:15 PM |

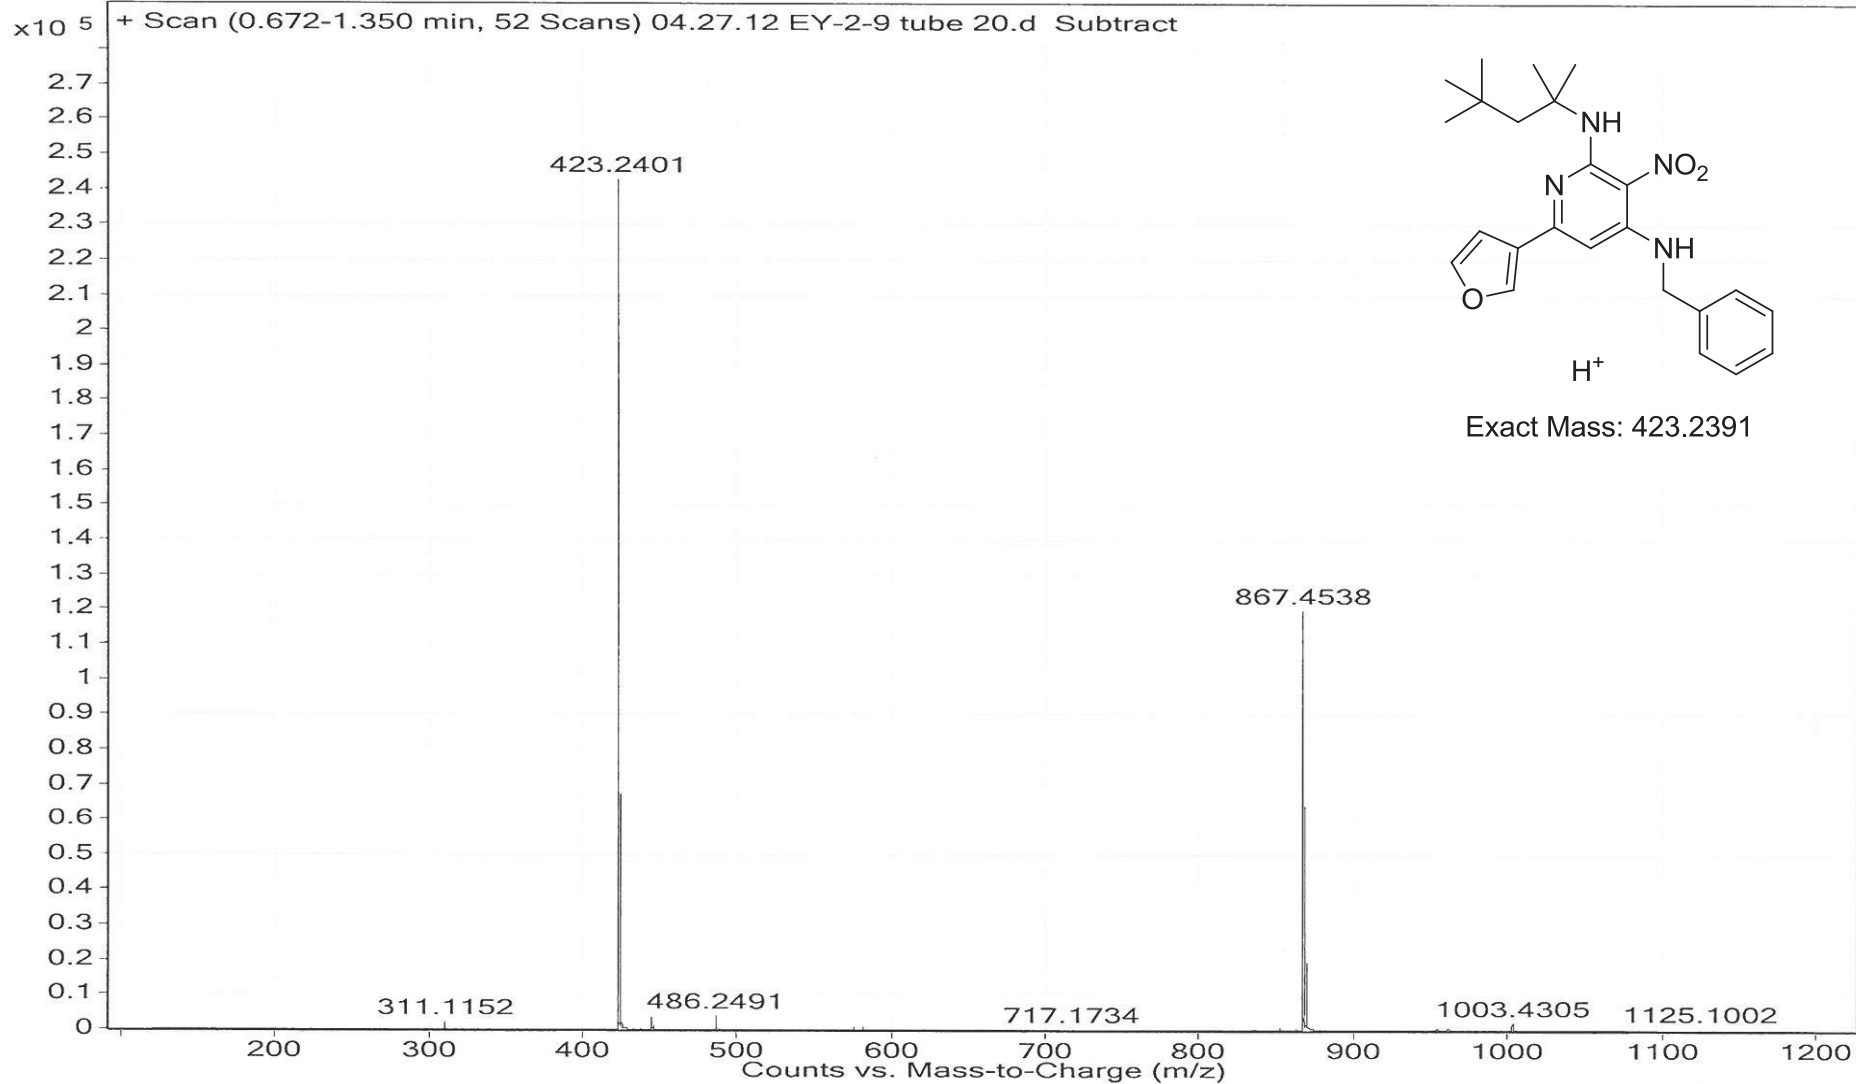

# 21e MS

|               |                    |             |                      |                 |              |                        |                      |
|---------------|--------------------|-------------|----------------------|-----------------|--------------|------------------------|----------------------|
| Sample Name   | 04.27.12 EY-2-11   | Position    | Vial 1               | Instrument Name | Instrument 1 | User Name              |                      |
| Inj Vol       | -1                 | InjPosition |                      | SampleType      | Sample       | IRM Calibration Status | Success              |
| Data Filename | 04.27.12 EY-2-11.d | ACQ Method  | Water-ACN Infusion M | Comment         |              | Acquired Time          | 4/27/2012 3:15:09 PM |

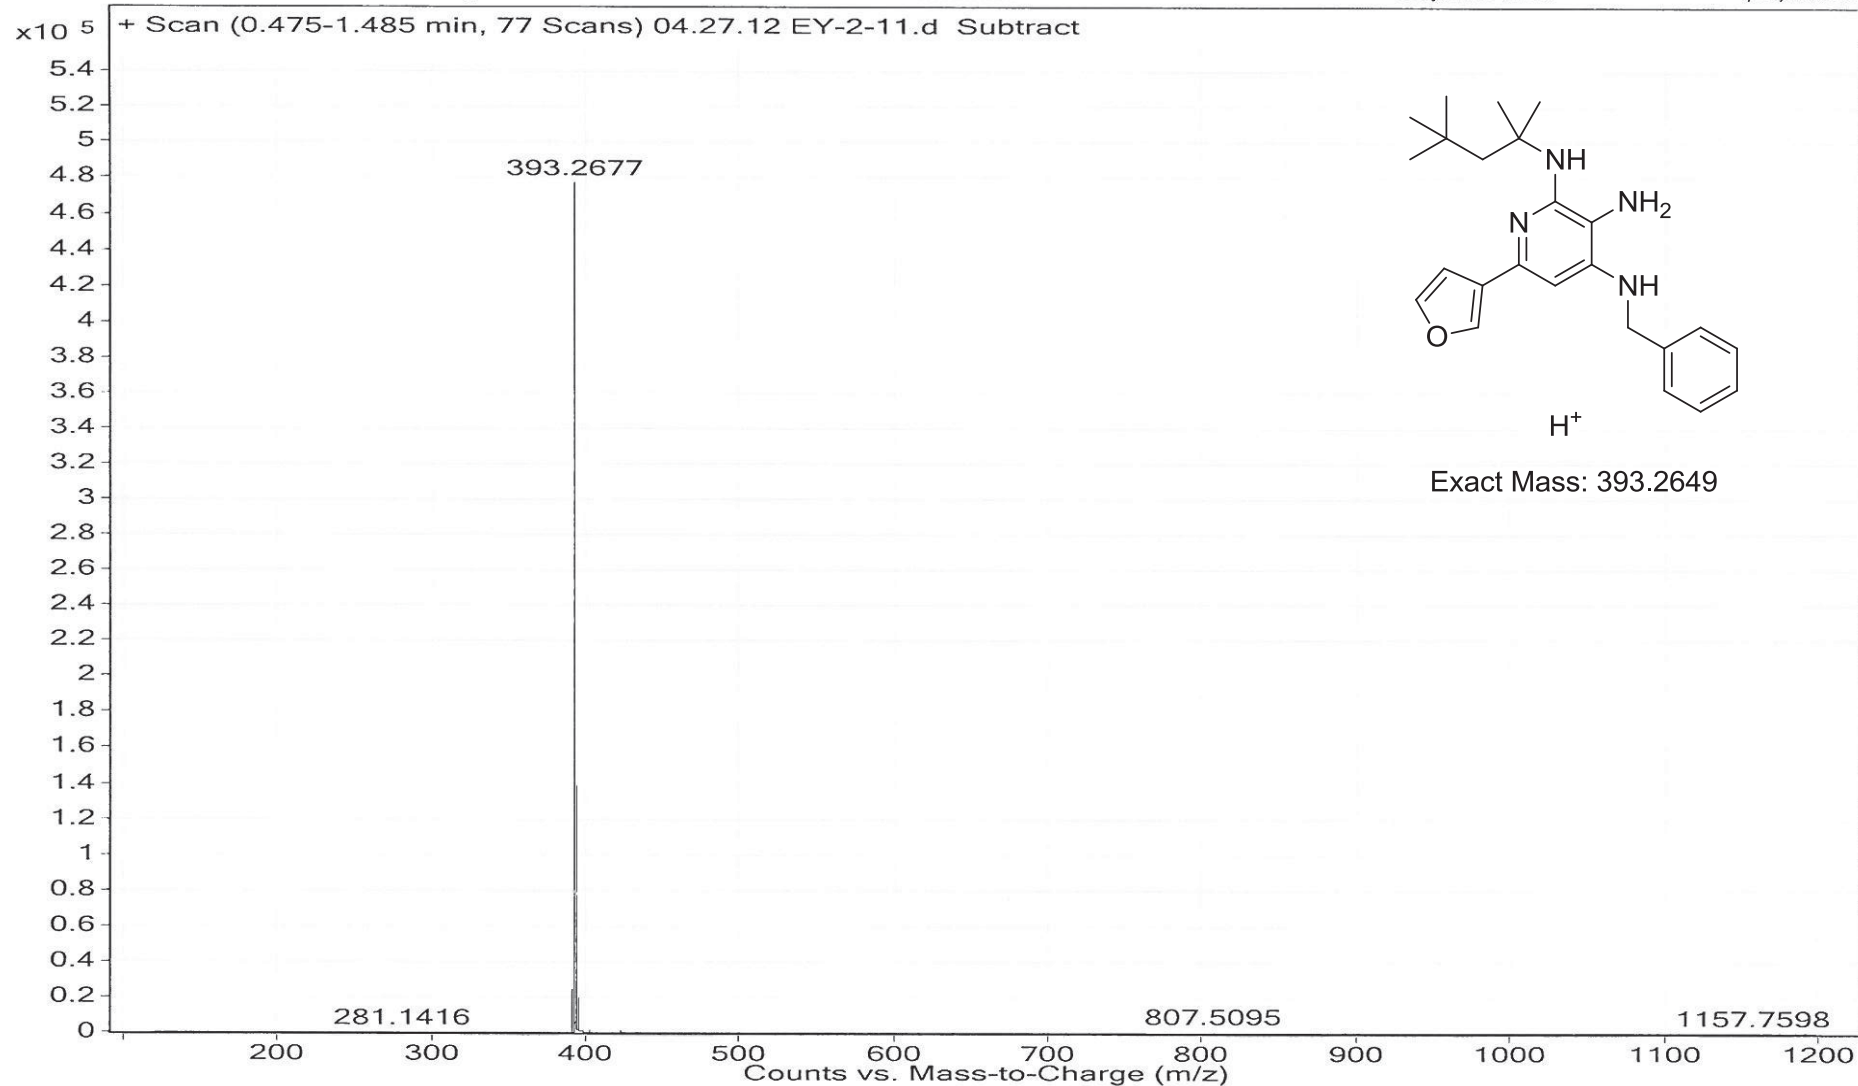

# 22e <sup>1</sup>H NMR

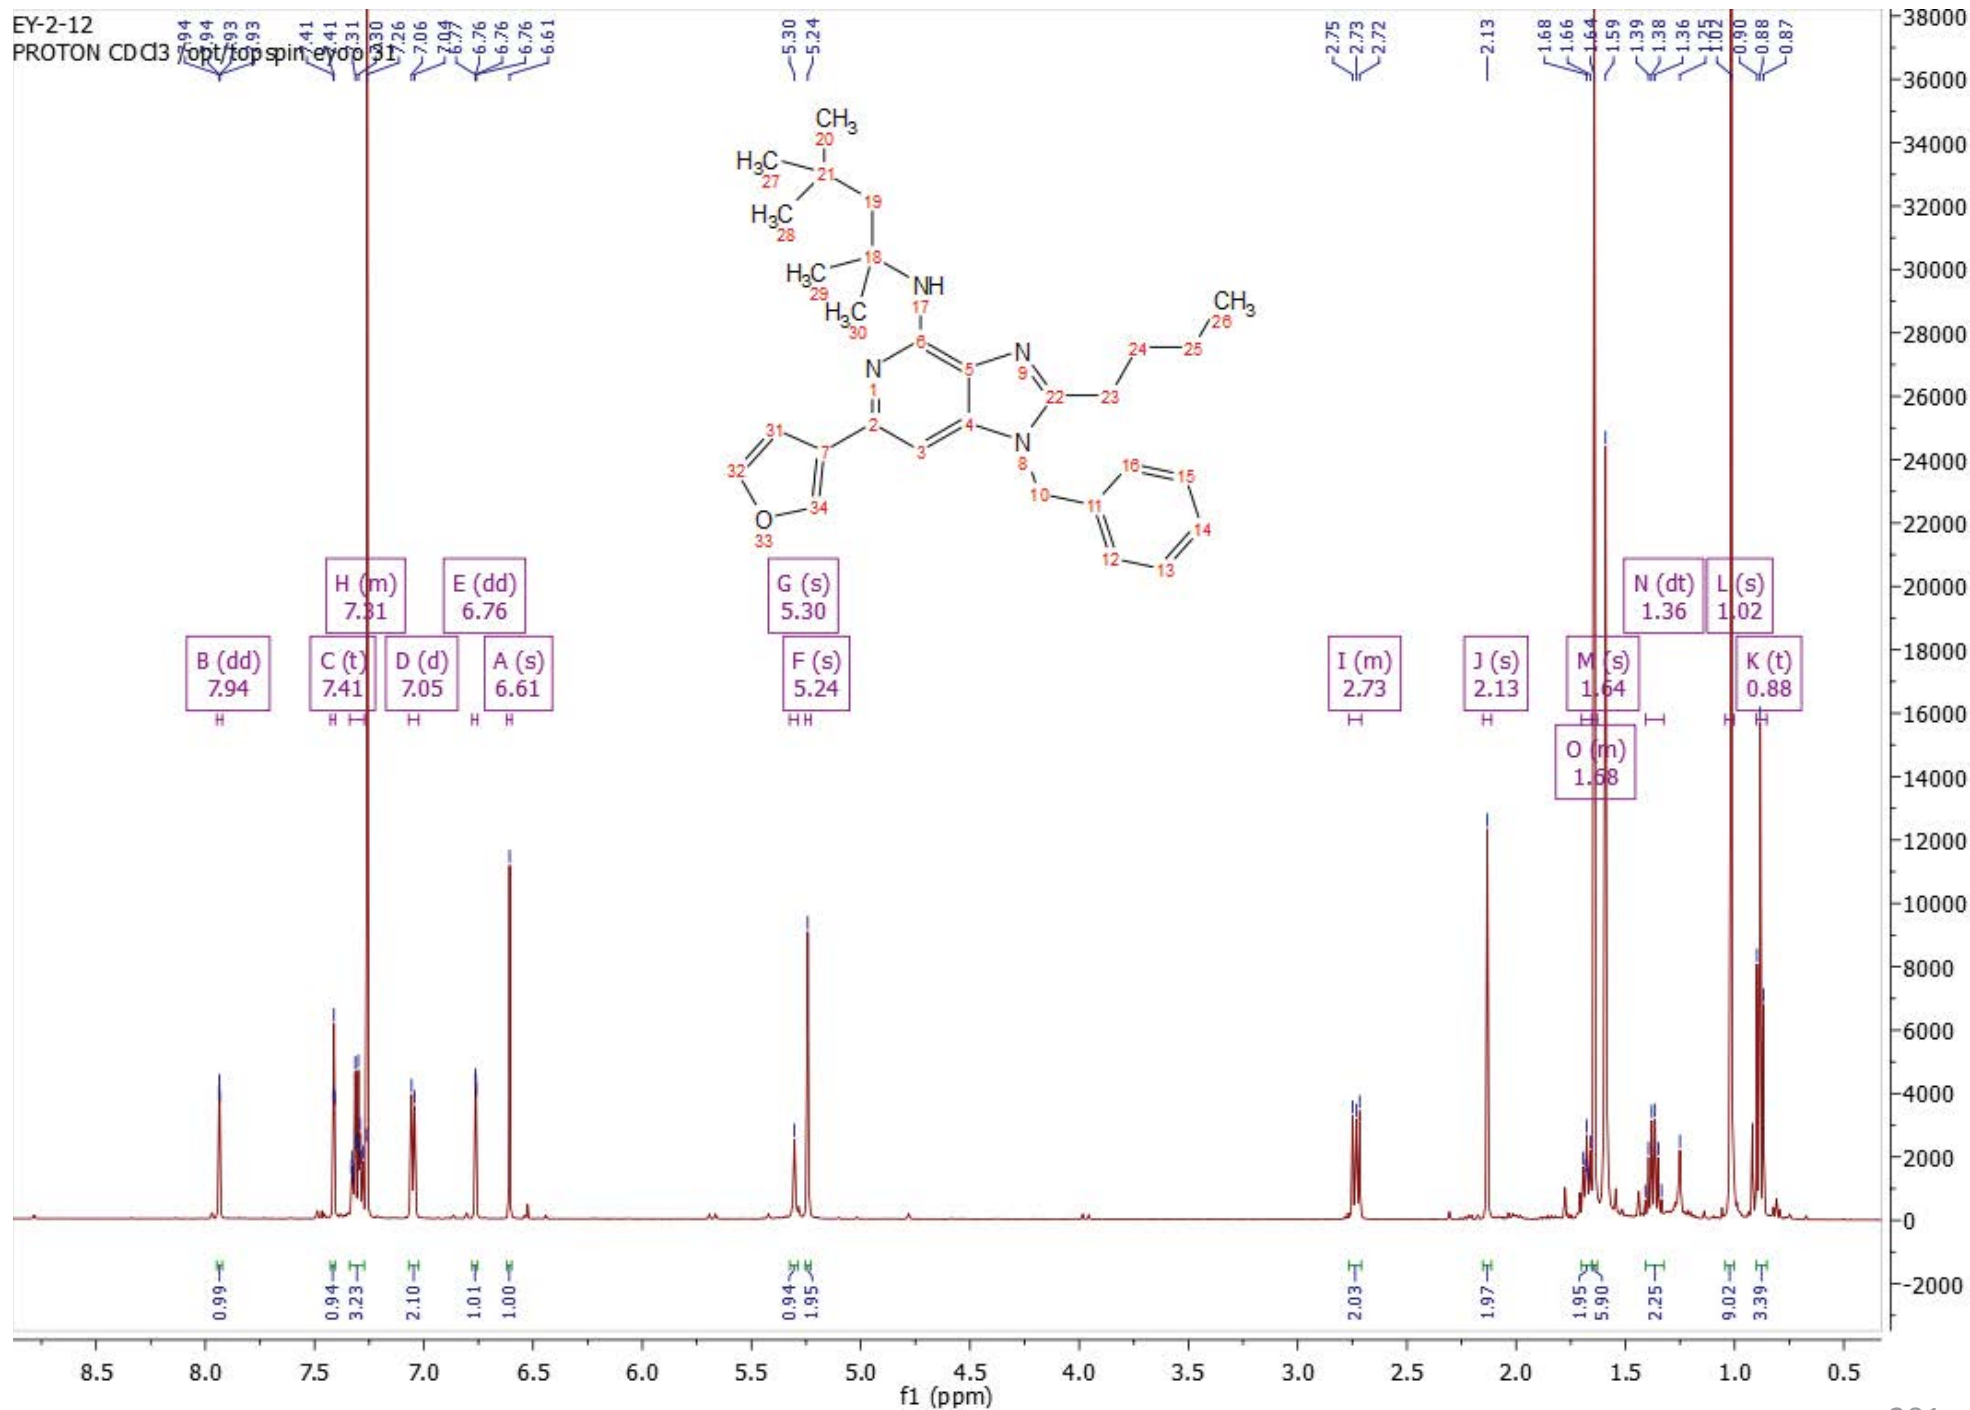



# 22e <sup>13</sup>C NMR

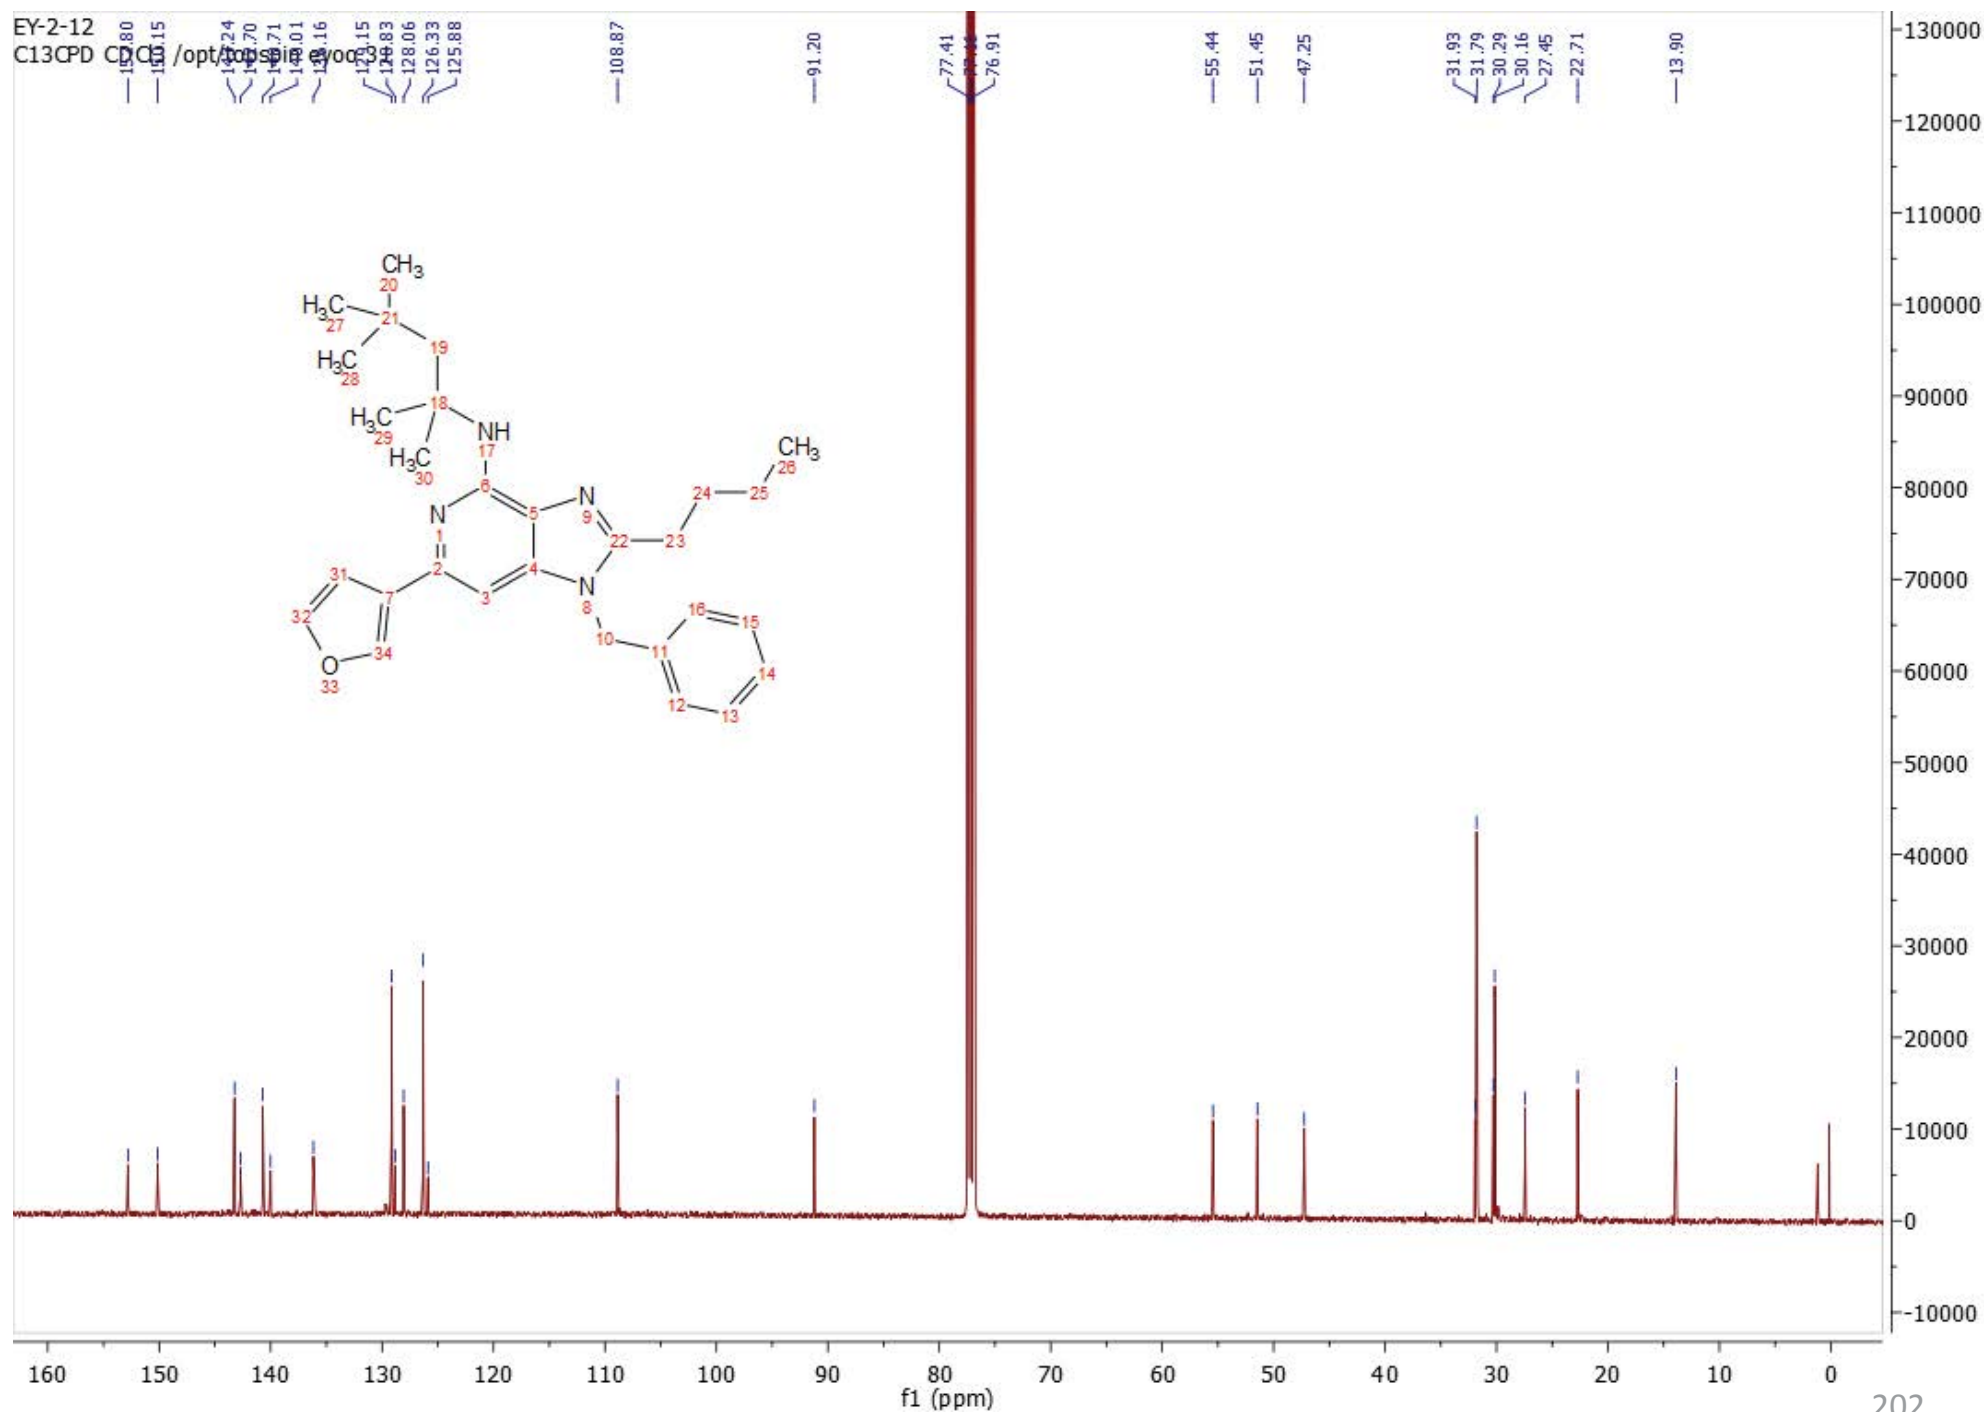

## 22e MS

|               |                      |             |                      |                 |              |                        |                      |
|---------------|----------------------|-------------|----------------------|-----------------|--------------|------------------------|----------------------|
| Sample Name   | 04.28.12 EY-2-12 tub | Position    | Vial 1               | Instrument Name | Instrument 1 | User Name              |                      |
| Inj Vol       | -1                   | InjPosition |                      | SampleType      | Sample       | IRM Calibration Status | Success              |
| Data Filename | 04.28.12 EY-2-12 tub | ACQ Method  | Water-ACN Infusion M | Comment         |              | Acquired Time          | 4/28/2012 2:35:52 PM |

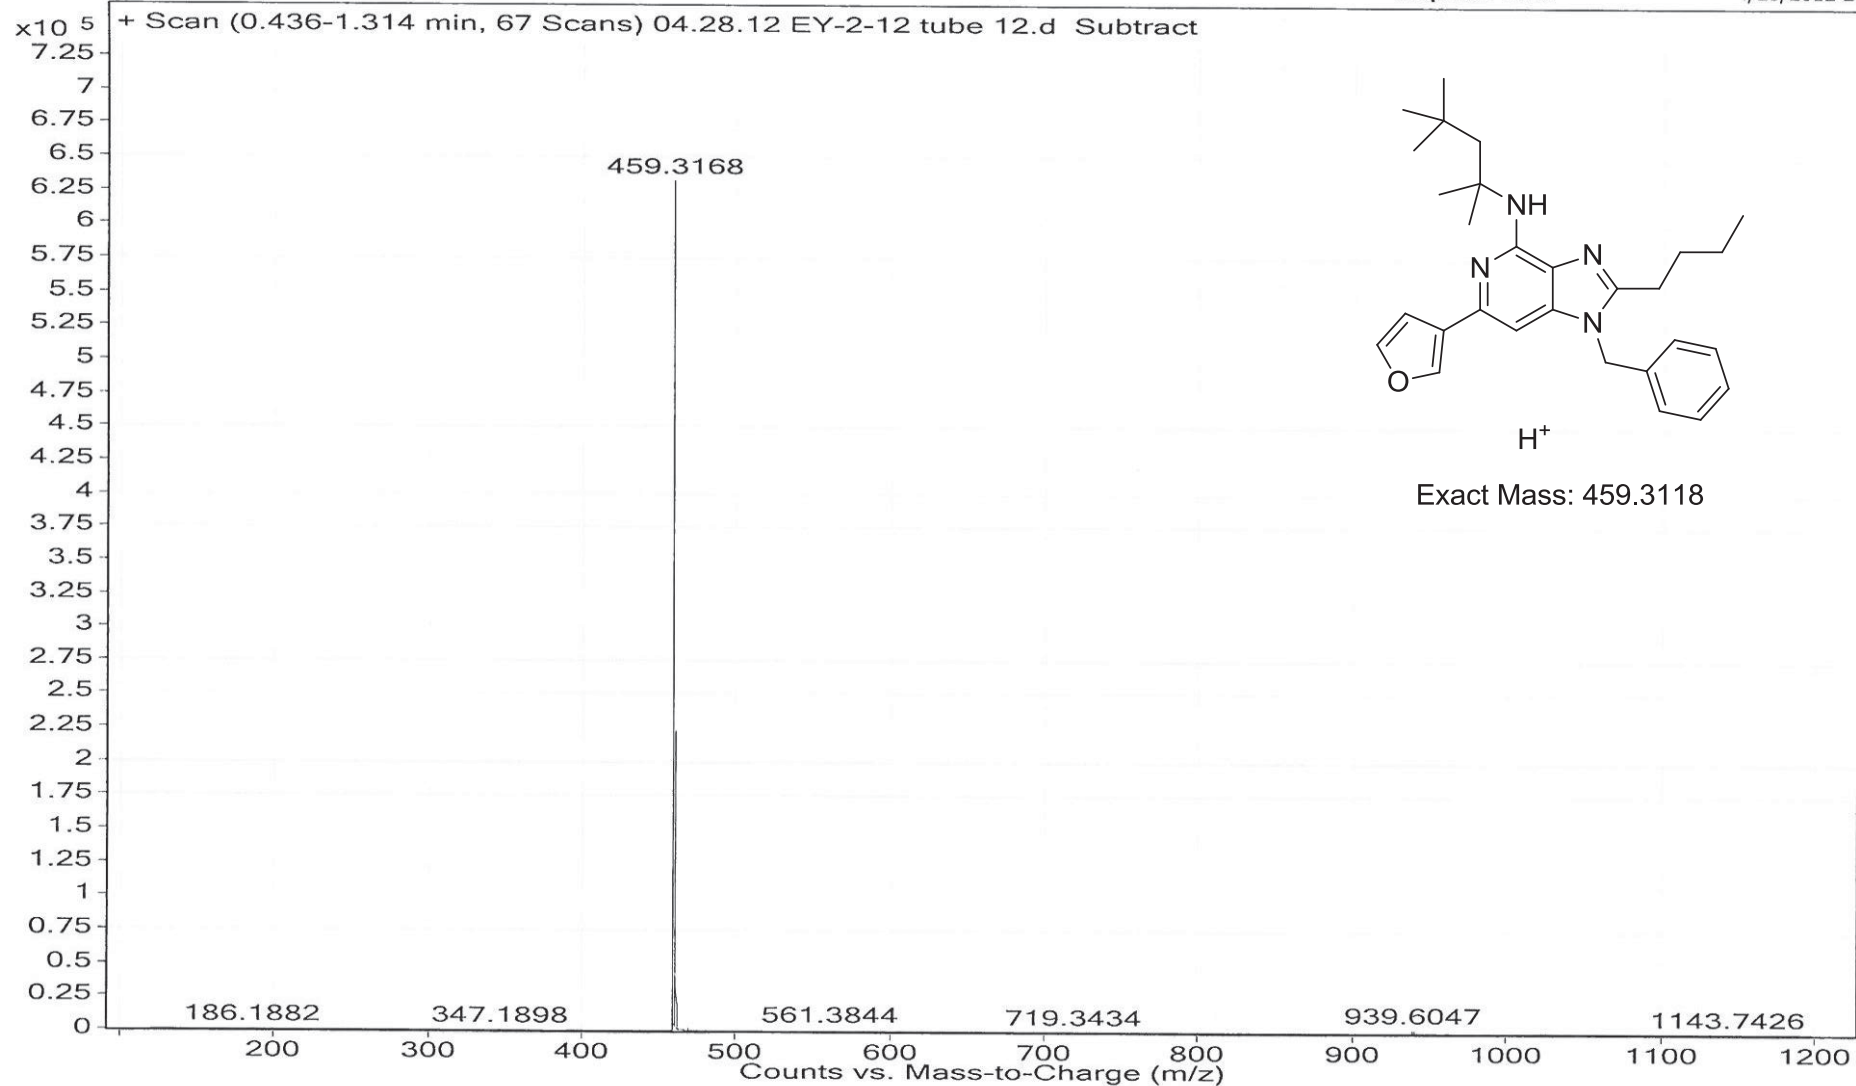

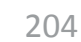

## 23e <sup>13</sup>C NMR

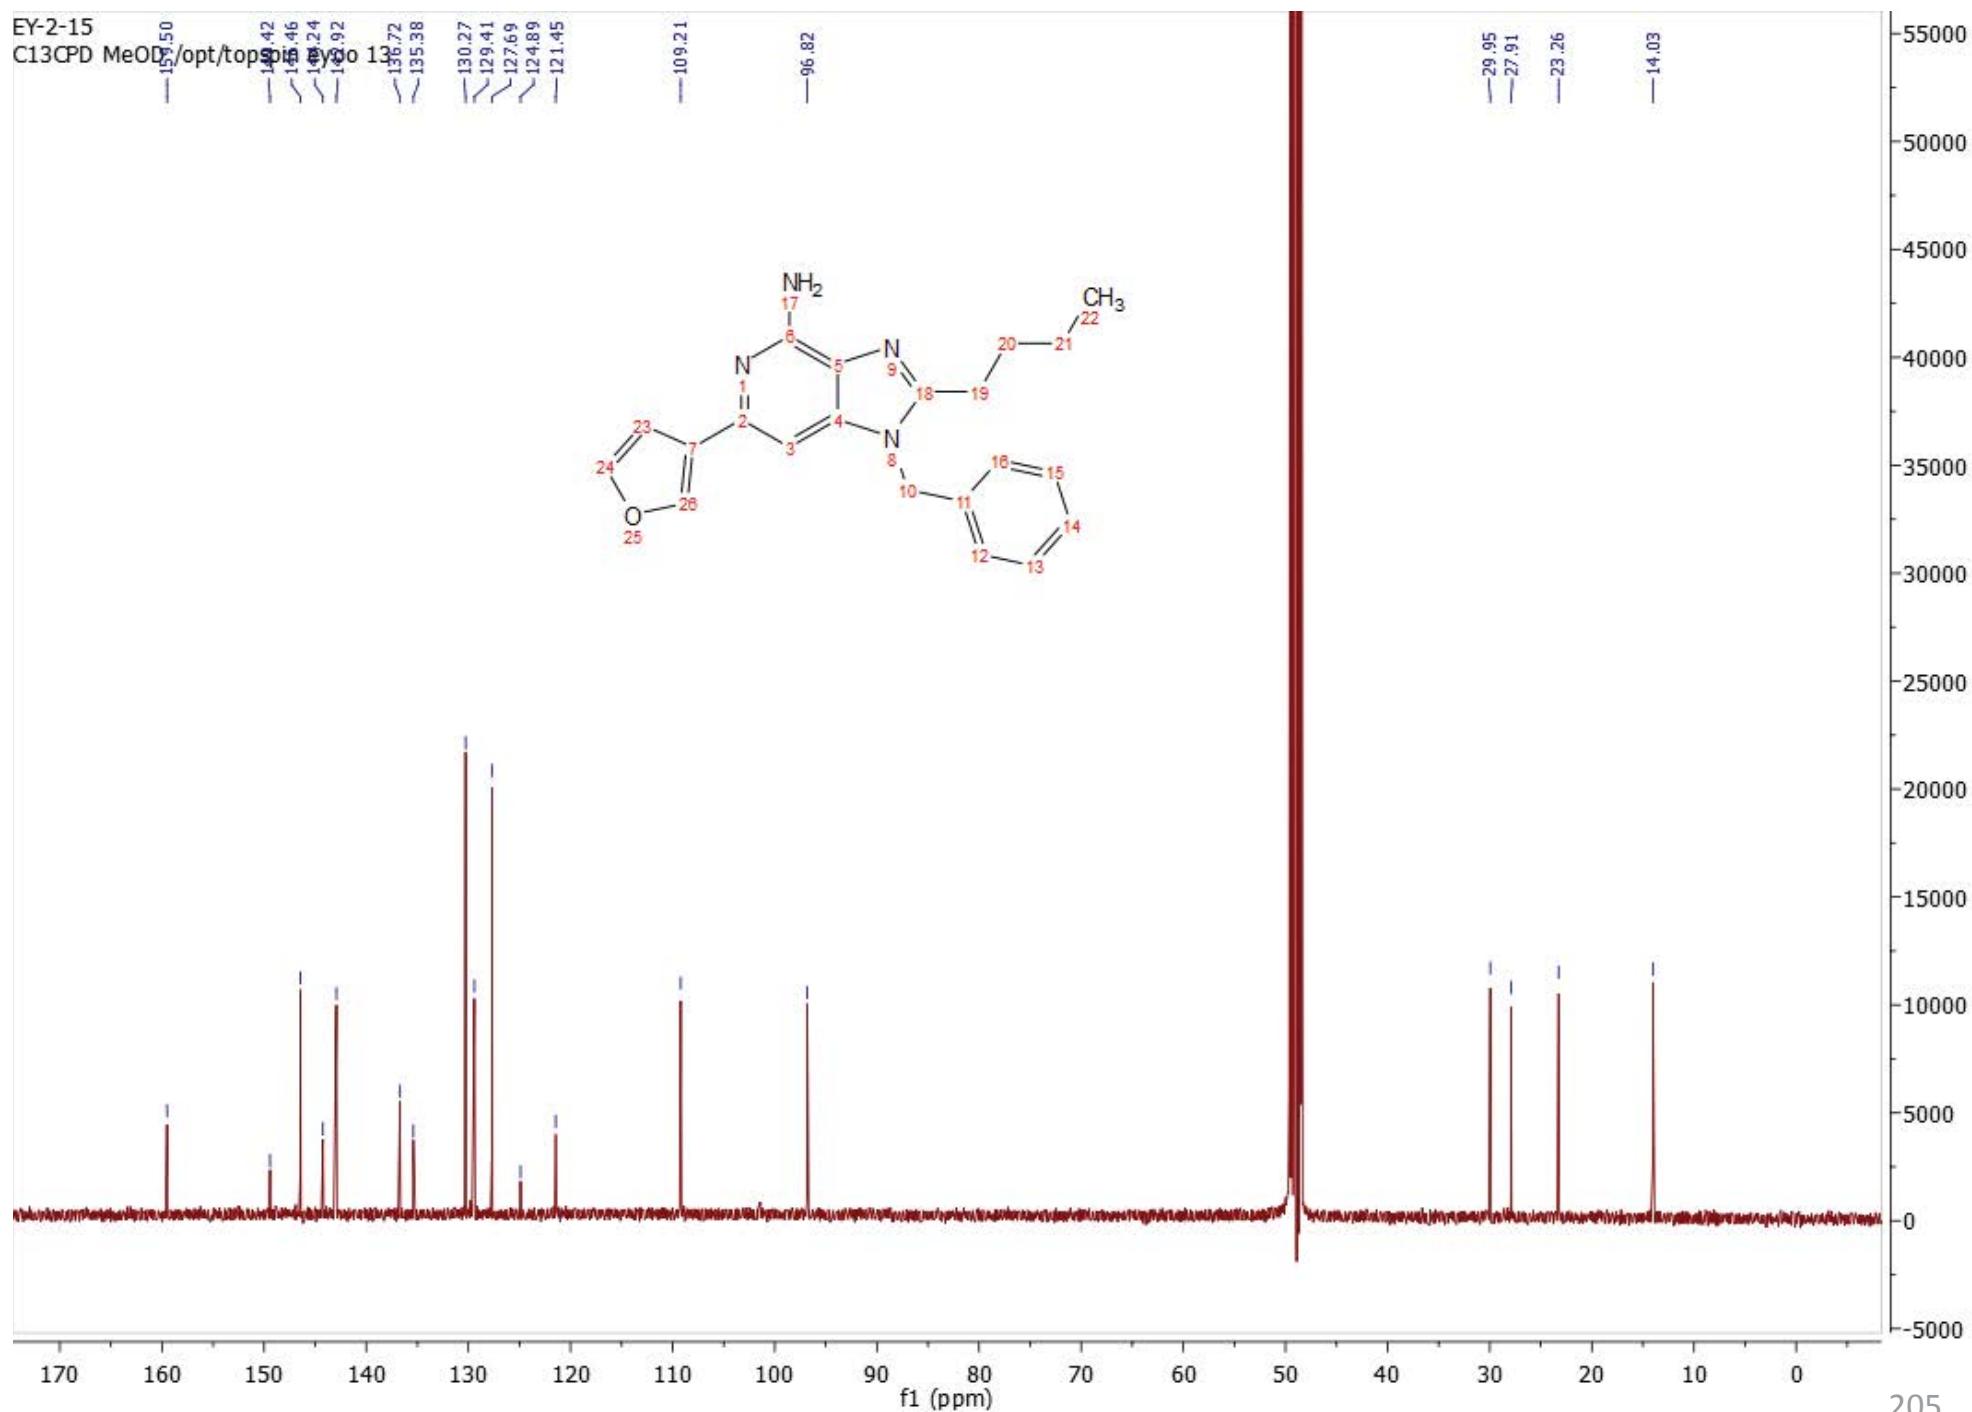

# 23e MS

|               |                    |             |             |                 |                                   |                        |             |
|---------------|--------------------|-------------|-------------|-----------------|-----------------------------------|------------------------|-------------|
| Sample Name   | Unavailable        | Position    | Unavailable | Instrument Name | Unavailable                       | User Name              | Unavailable |
| Inj Vol       | Unavailable        | InjPosition | Unavailable | SampleType      | Unavailable                       | IRM Calibration Status | Success     |
| Data Filename | 04.30.12 EY-2-15.d | ACQ Method  |             | Comment         | Sample information is unavailable | Acquired Time          | Unavailable |

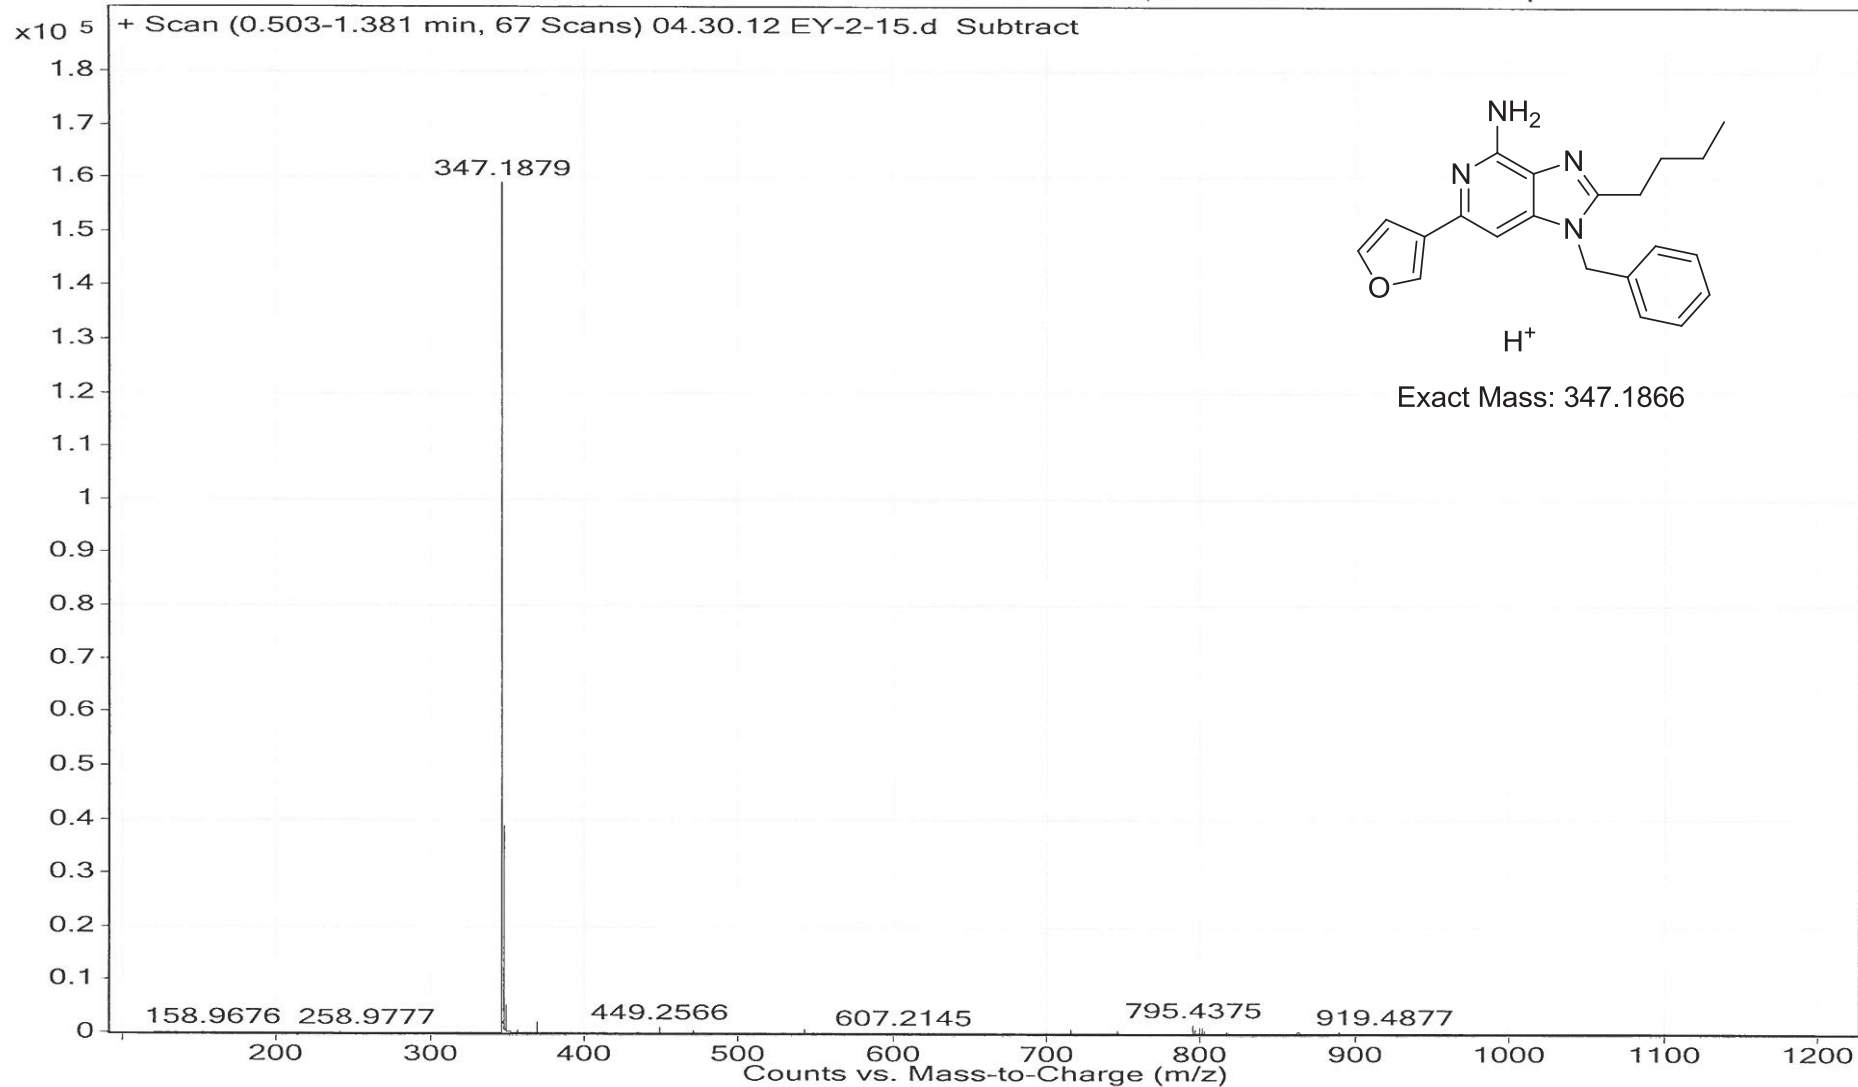

## 23e LC-MS

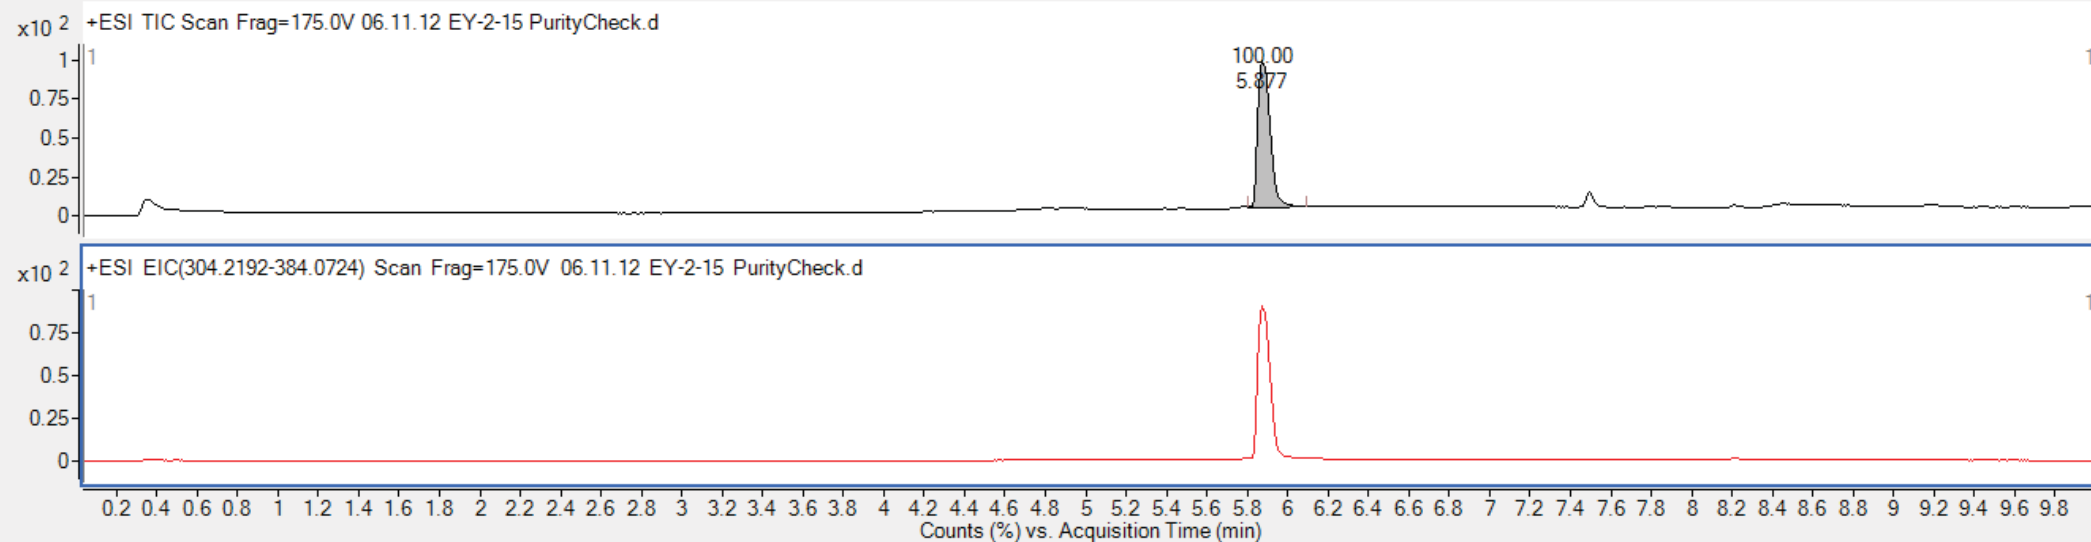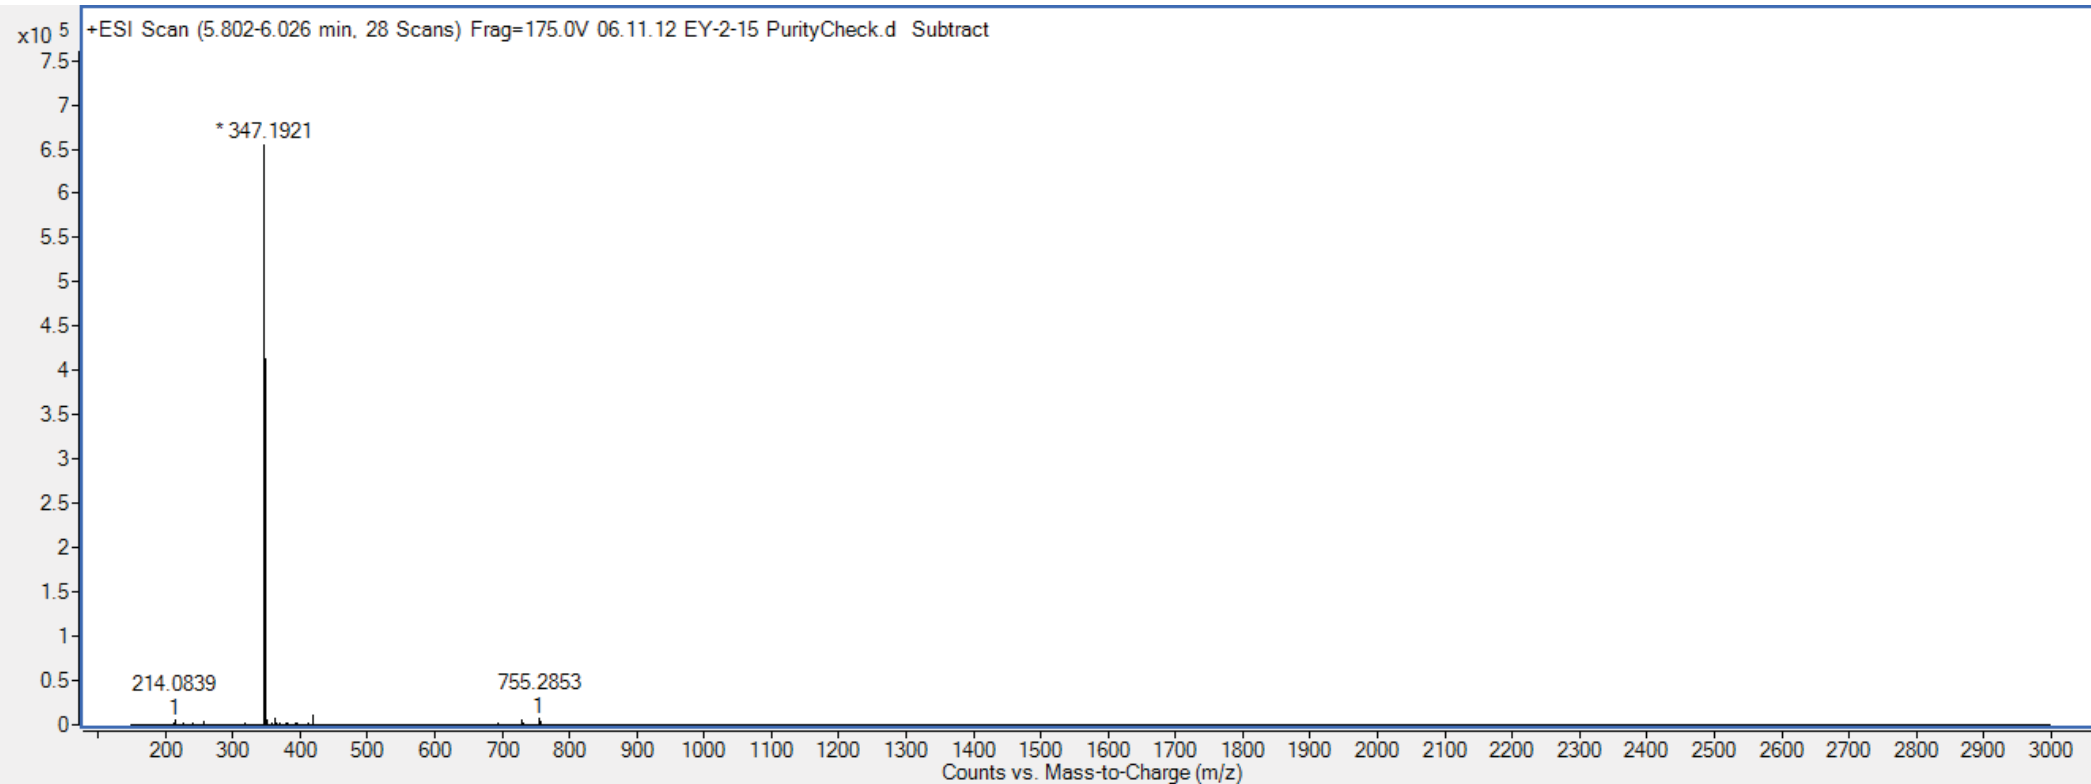

# **20f** <sup>1</sup>H NMR

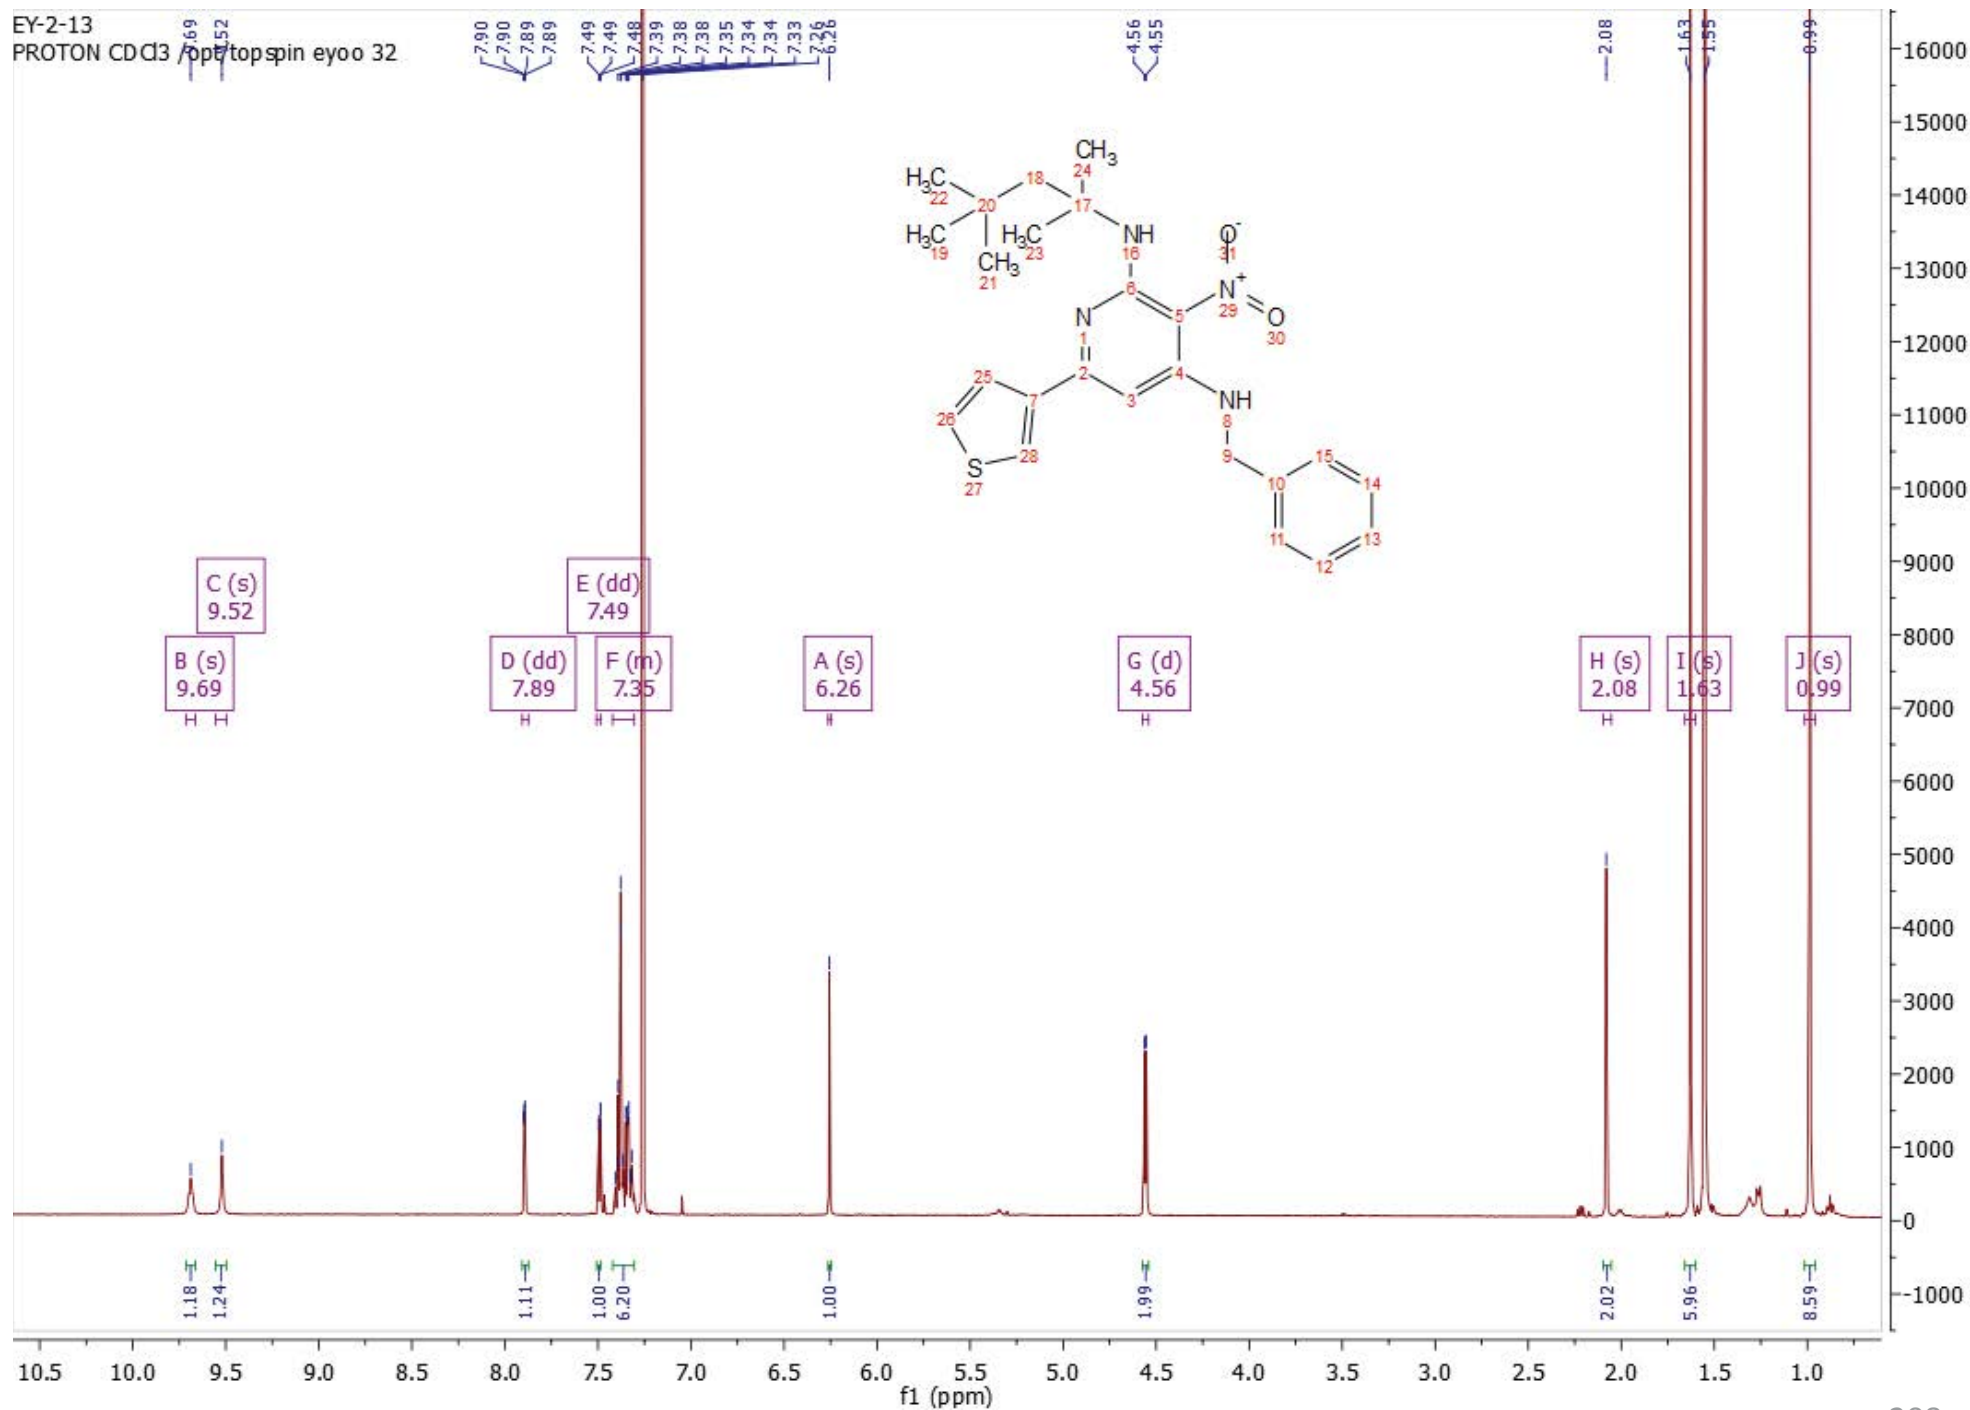



# 20f <sup>13</sup>C NMR

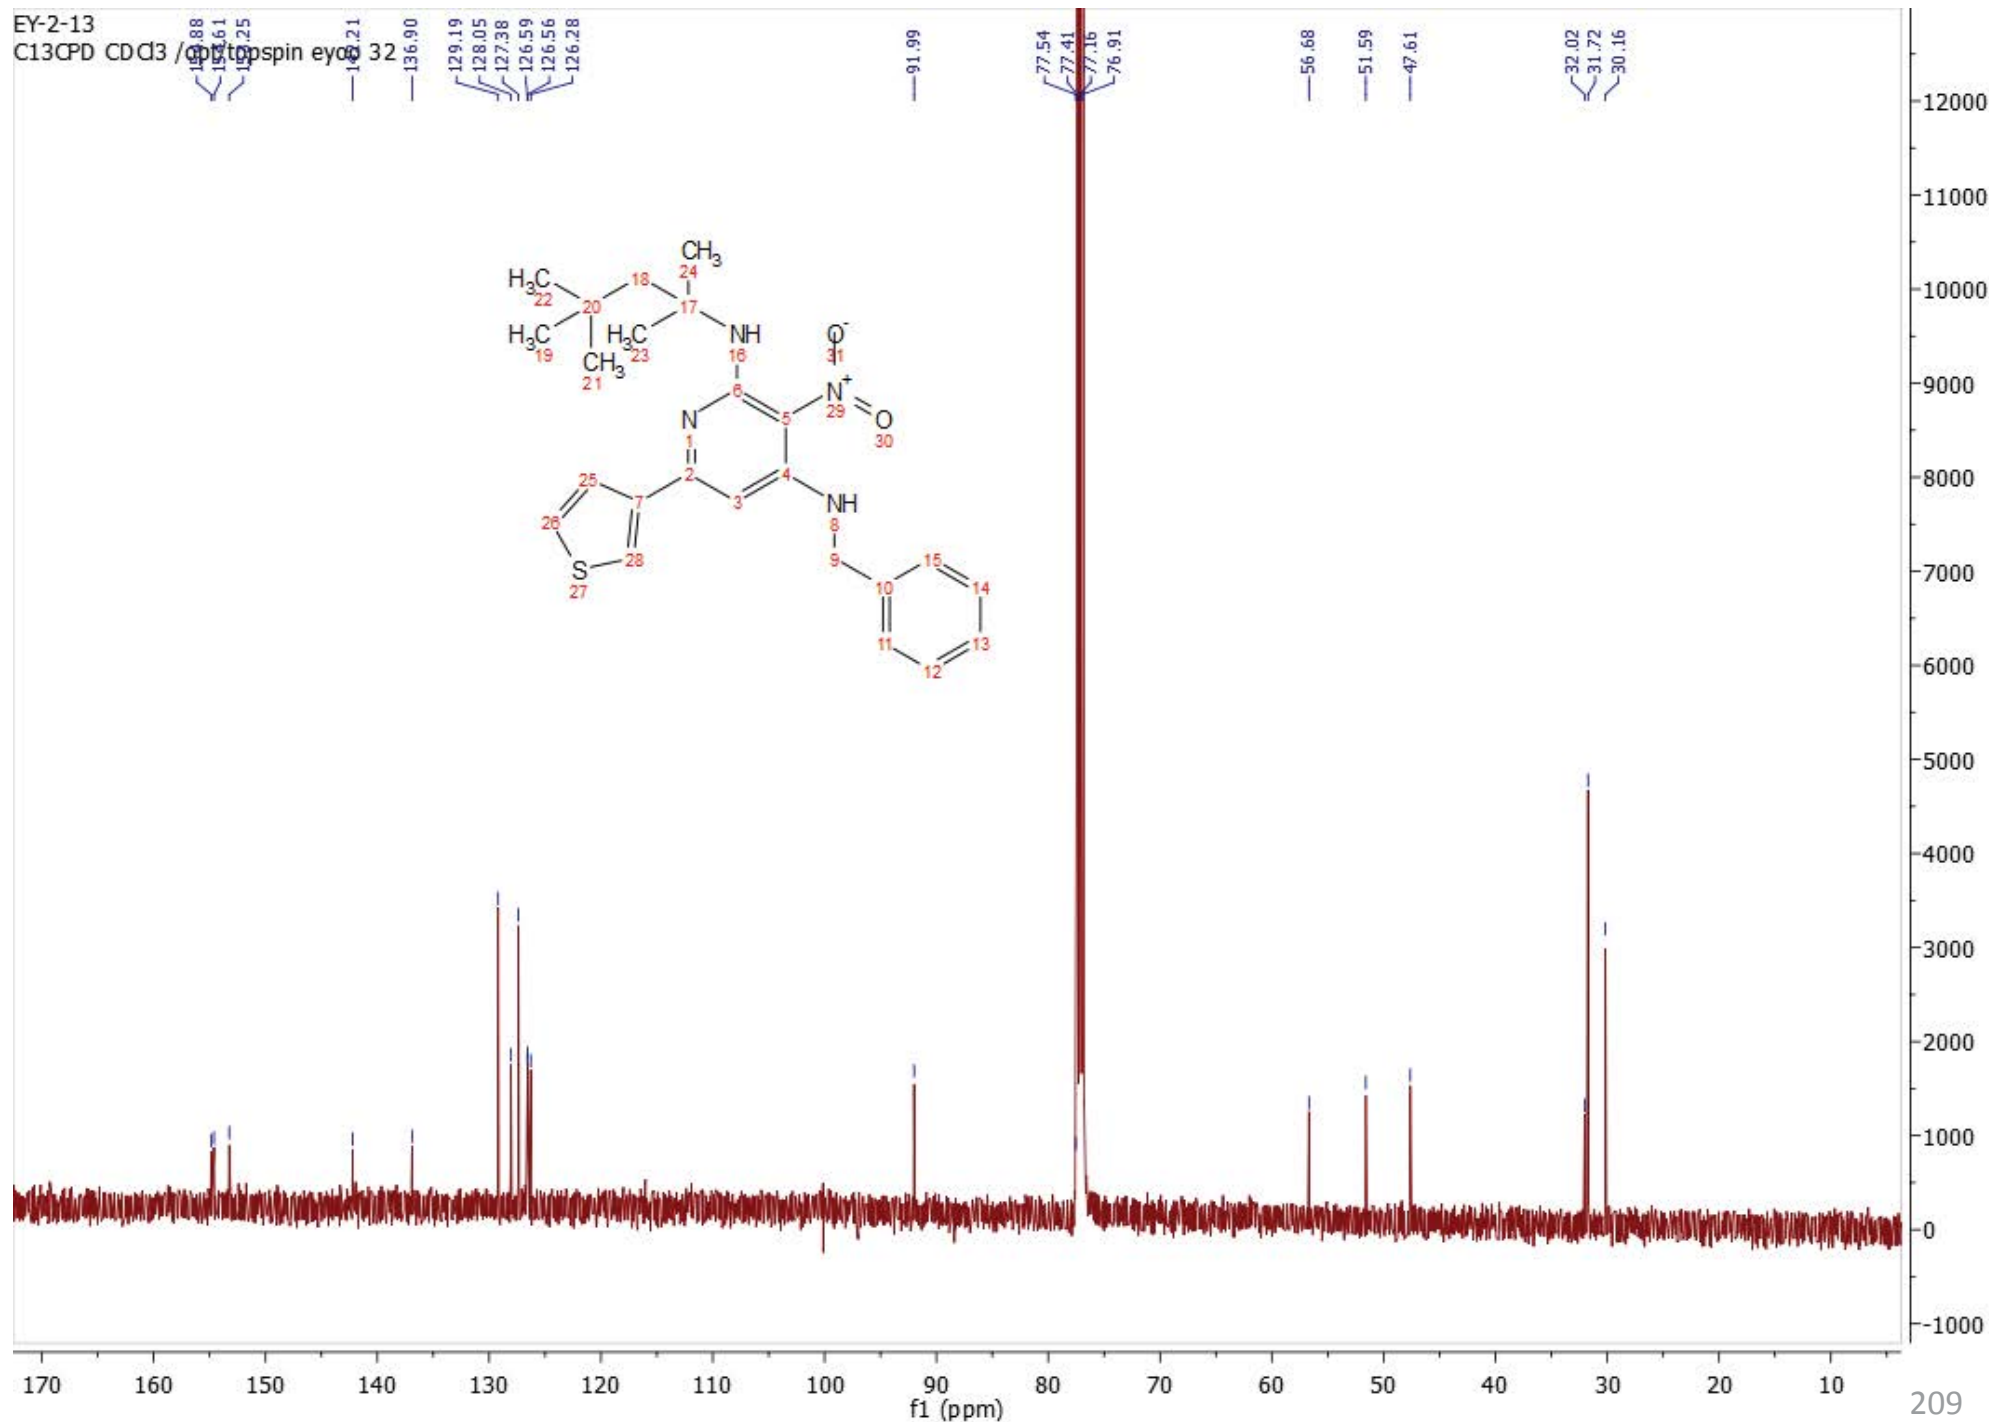

# 20f MS

|               |                    |             |                      |                 |              |                        |                       |
|---------------|--------------------|-------------|----------------------|-----------------|--------------|------------------------|-----------------------|
| Sample Name   | 04.28.12 EY-2-13   | Position    | Vial 1               | Instrument Name | Instrument 1 | User Name              |                       |
| Inj Vol       | -1                 | InjPosition |                      | SampleType      | Sample       | IRM Calibration Status | Success               |
| Data Filename | 04.28.12 EY-2-13.d | ACQ Method  | Water-ACN Infusion M | Comment         |              | Acquired Time          | 4/28/2012 12:52:05 PM |

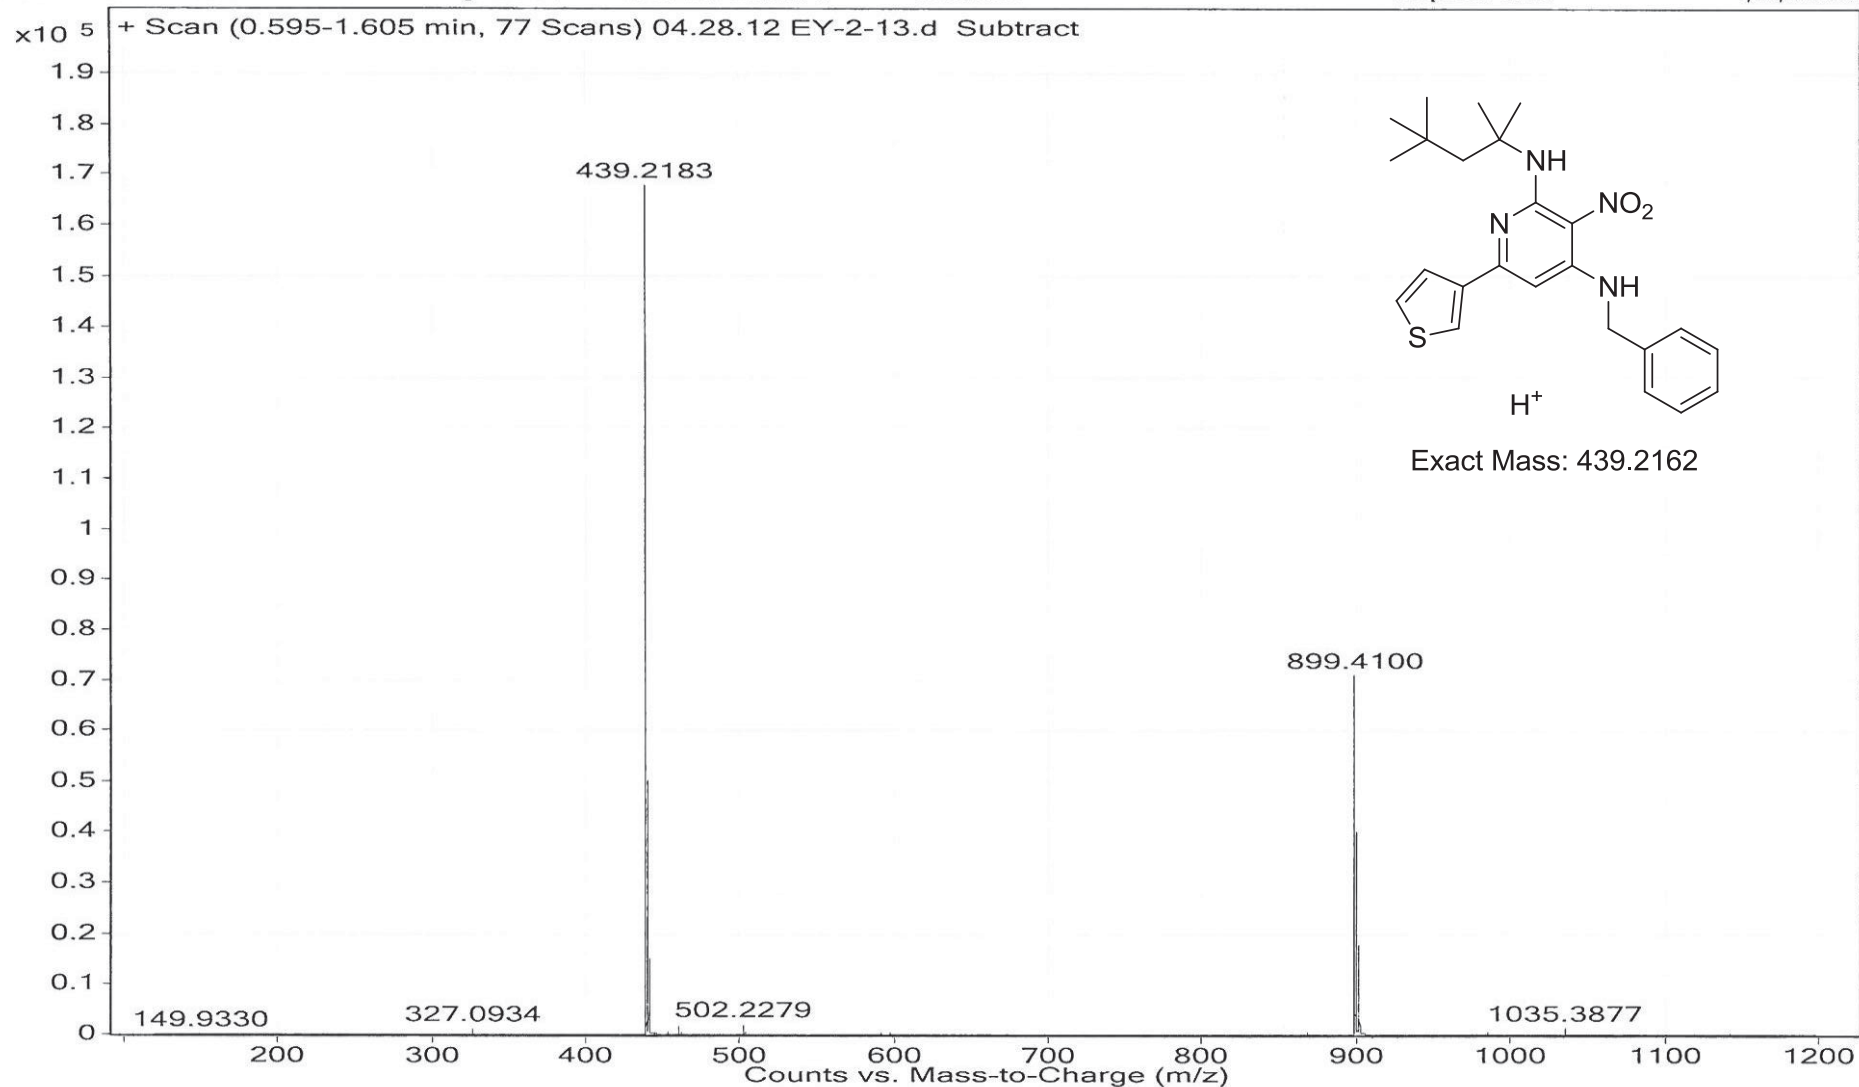

# 21f MS

|               |                      |             |                      |                 |              |                        |                       |
|---------------|----------------------|-------------|----------------------|-----------------|--------------|------------------------|-----------------------|
| Sample Name   | 04.30.12 EY-2-14 tub | Position    | Vial 1               | Instrument Name | Instrument 1 | User Name              |                       |
| Inj Vol       | -1                   | InjPosition |                      | SampleType      | Sample       | IRM Calibration Status | Success               |
| Data Filename | 04.30.12 EY-2-14 tub | ACQ Method  | Water-ACN Infusion M | Comment         |              | Acquired Time          | 4/30/2012 10:17:17 AM |

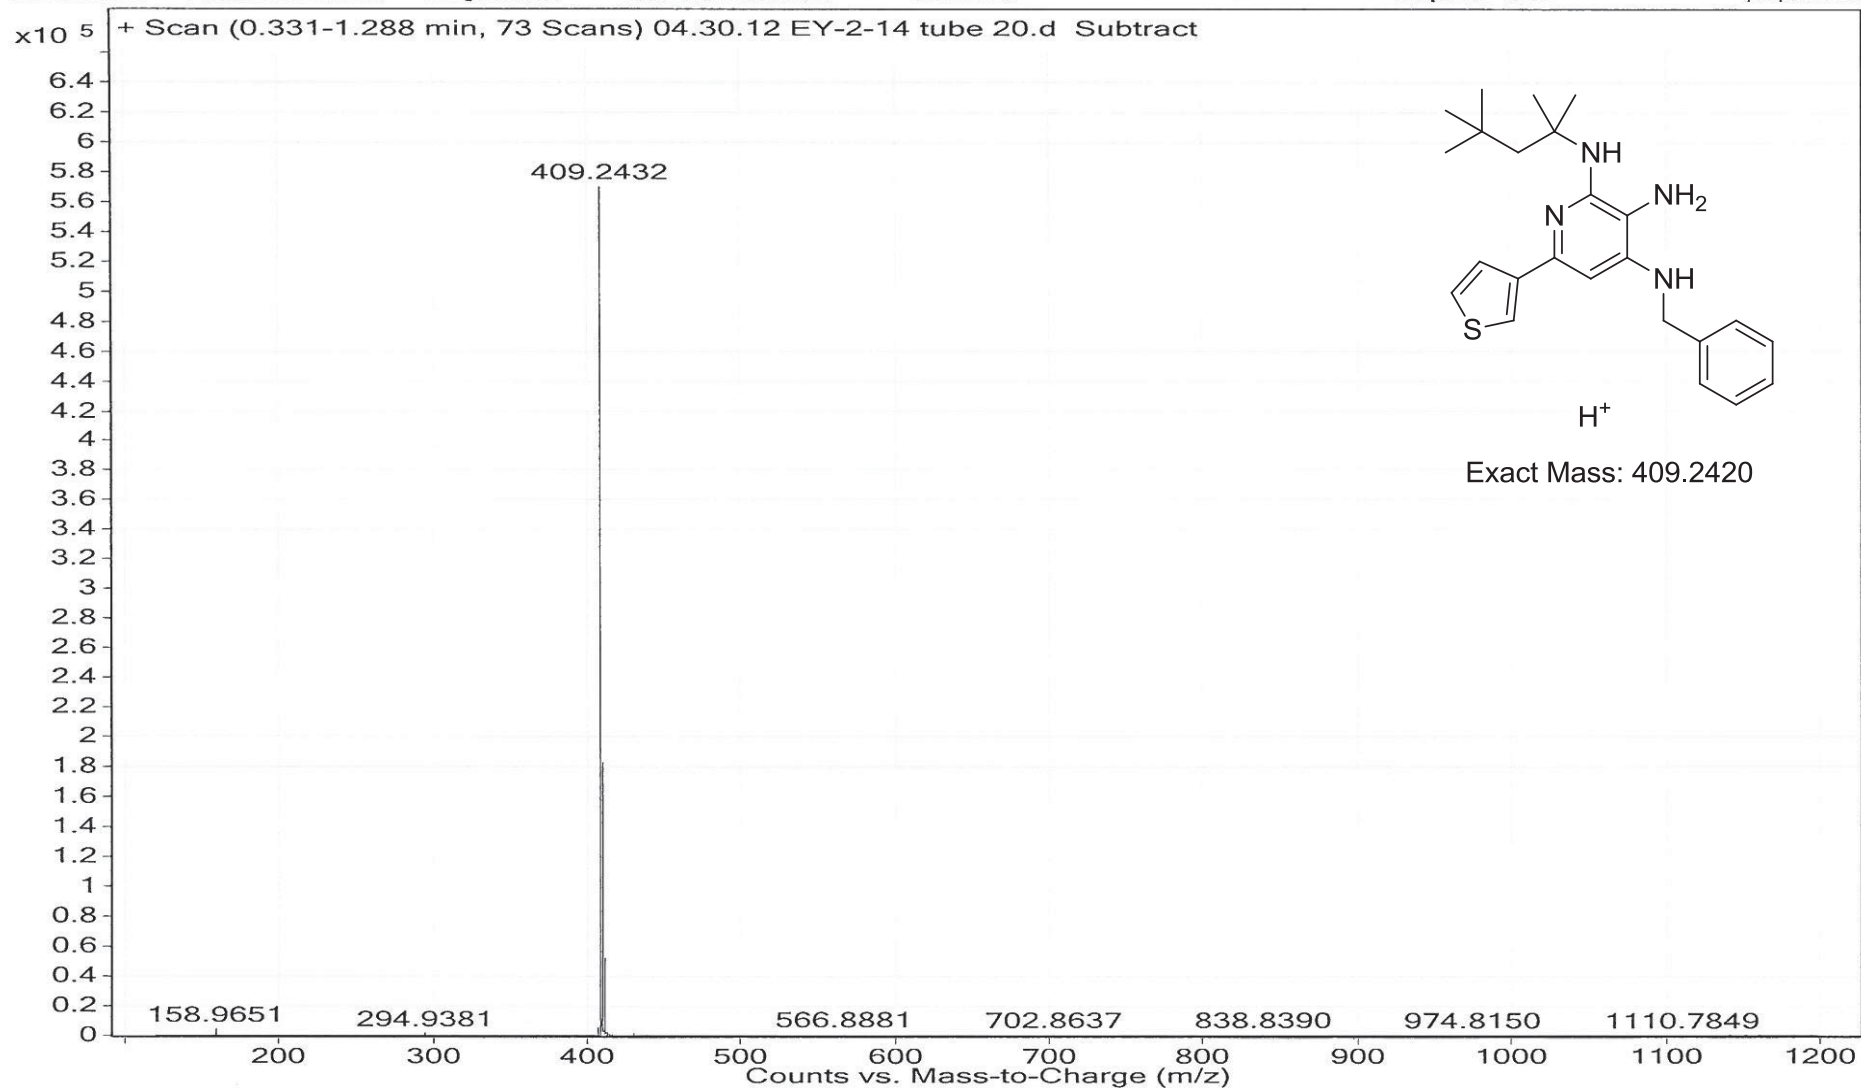

# **22f** <sup>1</sup>H NMR

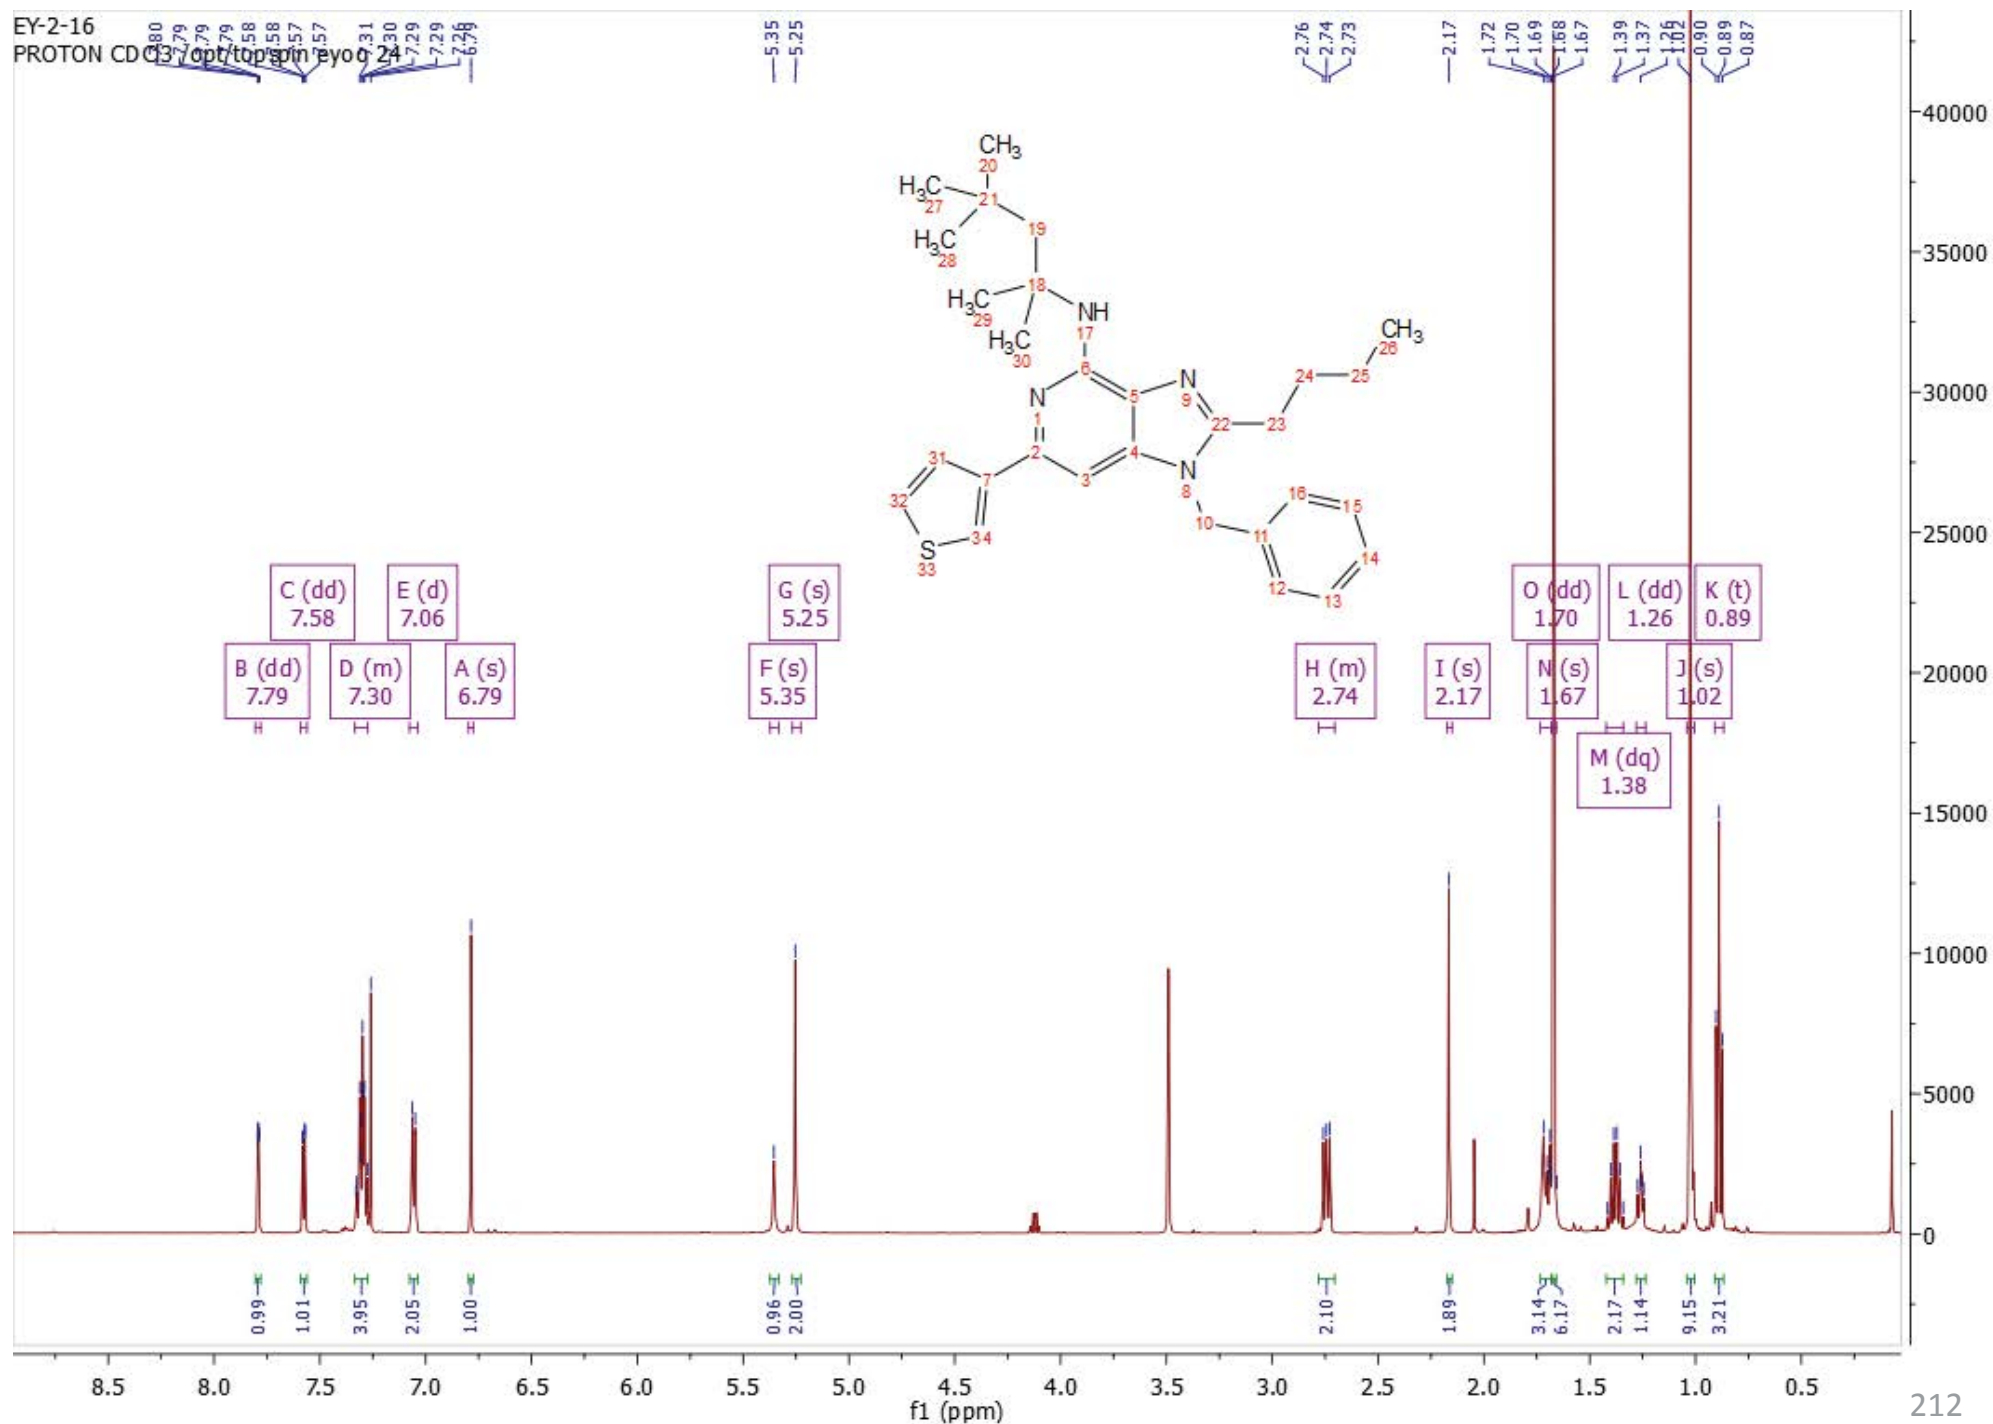

# **22f** <sup>13</sup>C NMR

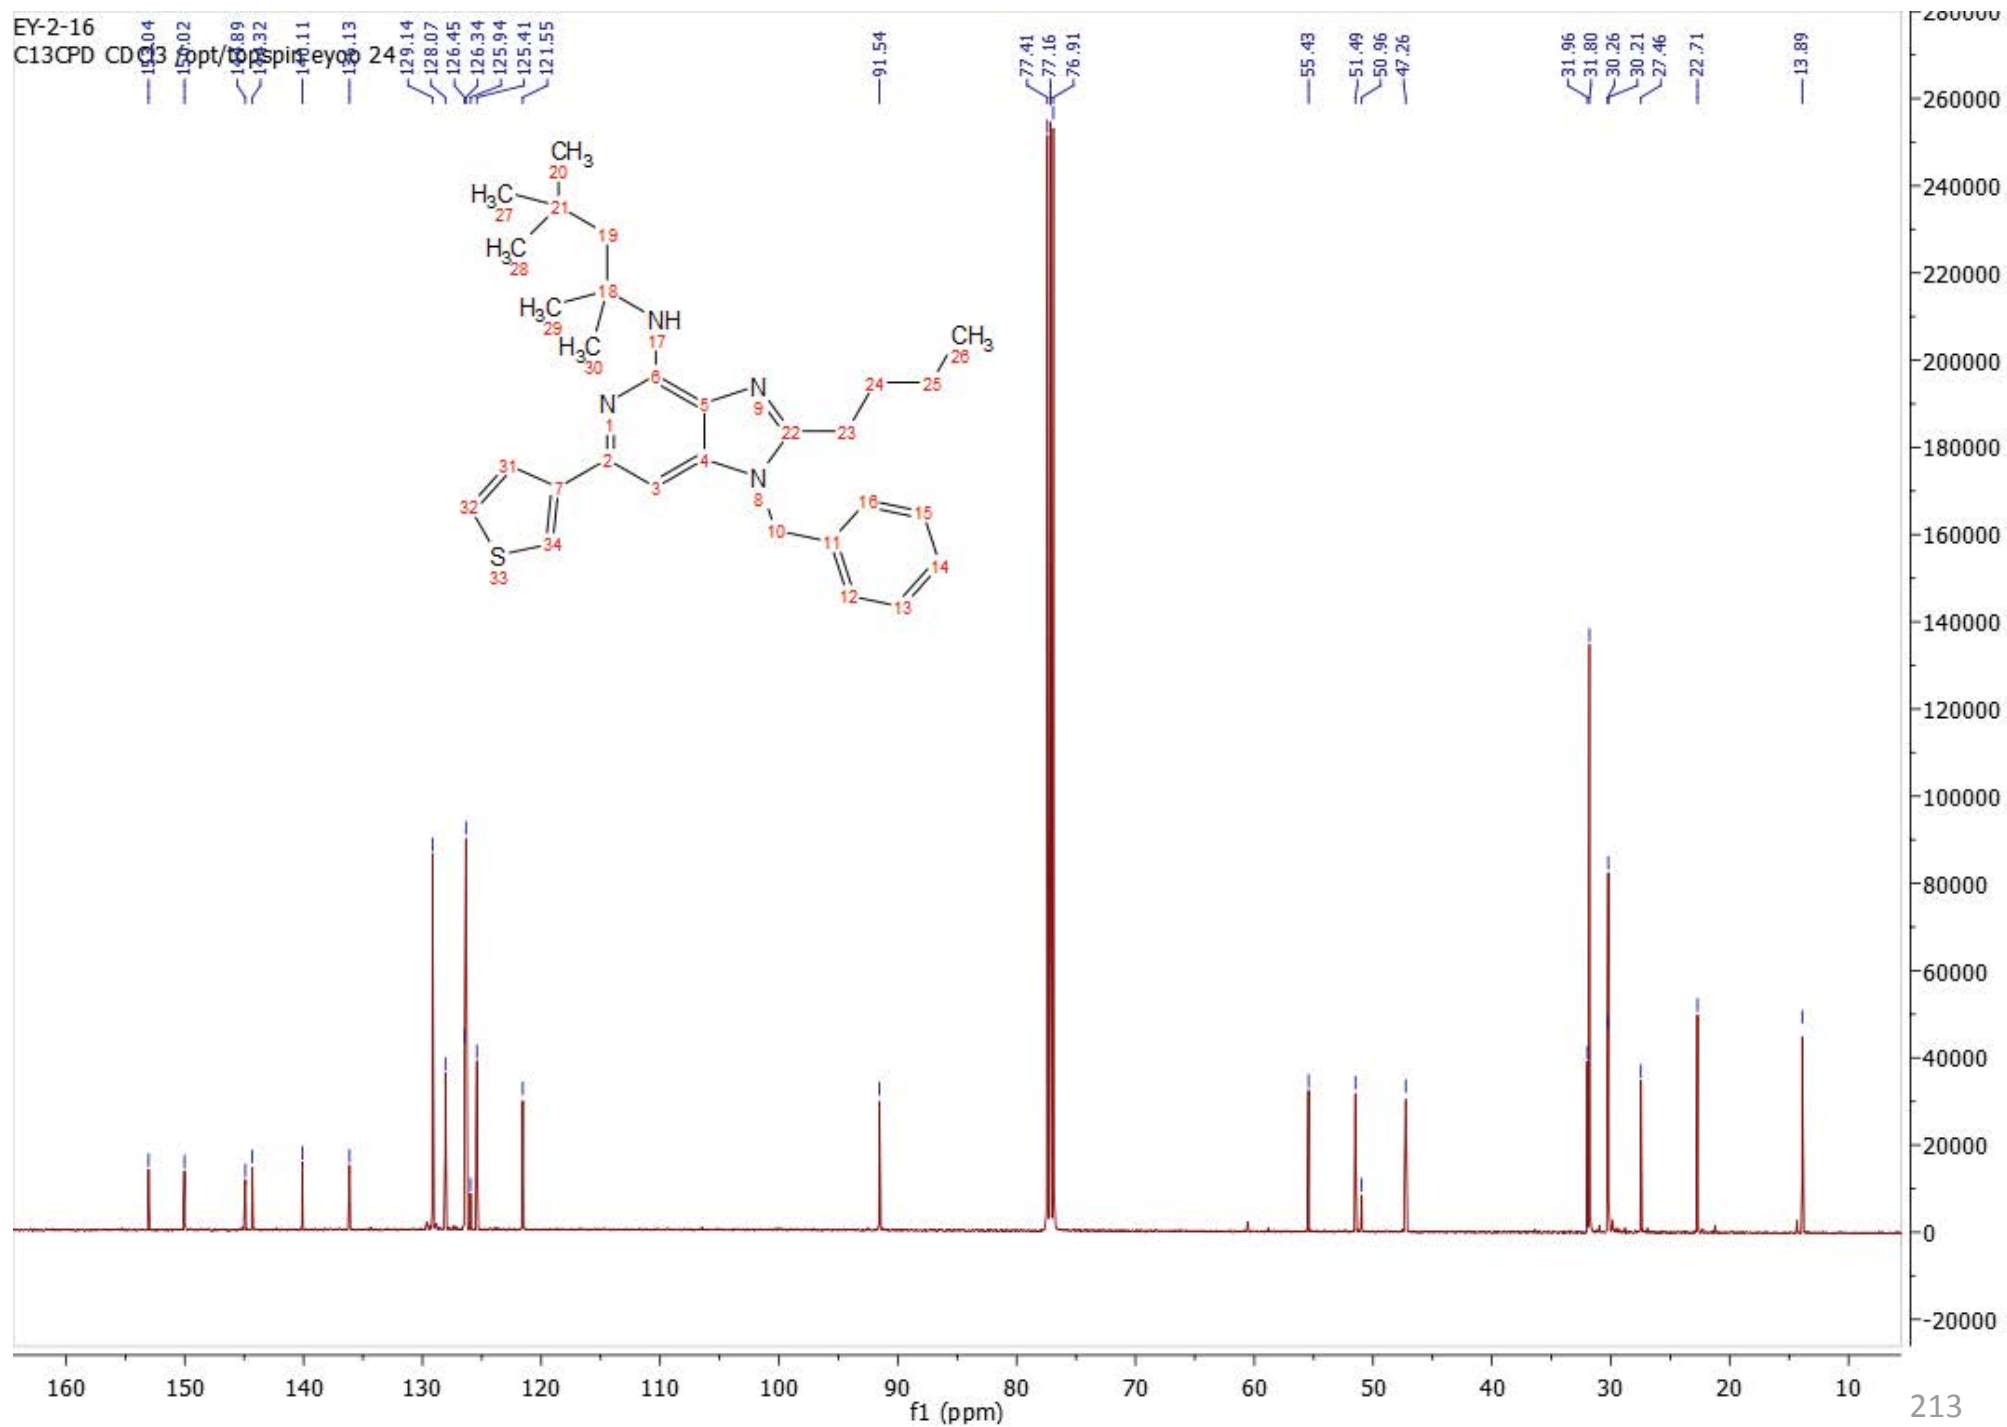

## 22f MS

|               |                      |             |                      |                 |              |                        |                     |
|---------------|----------------------|-------------|----------------------|-----------------|--------------|------------------------|---------------------|
| Sample Name   | 05.01.12 EY-2-16 tub | Position    | Vial 1               | Instrument Name | Instrument 1 | User Name              |                     |
| Inj Vol       | -1                   | InjPosition |                      | SampleType      | Sample       | IRM Calibration Status | Success             |
| Data Filename | 05.01.12 EY-2-16 tub | ACQ Method  | Water-ACN Infusion M | Comment         |              | Acquired Time          | 5/1/2012 2:48:02 PM |

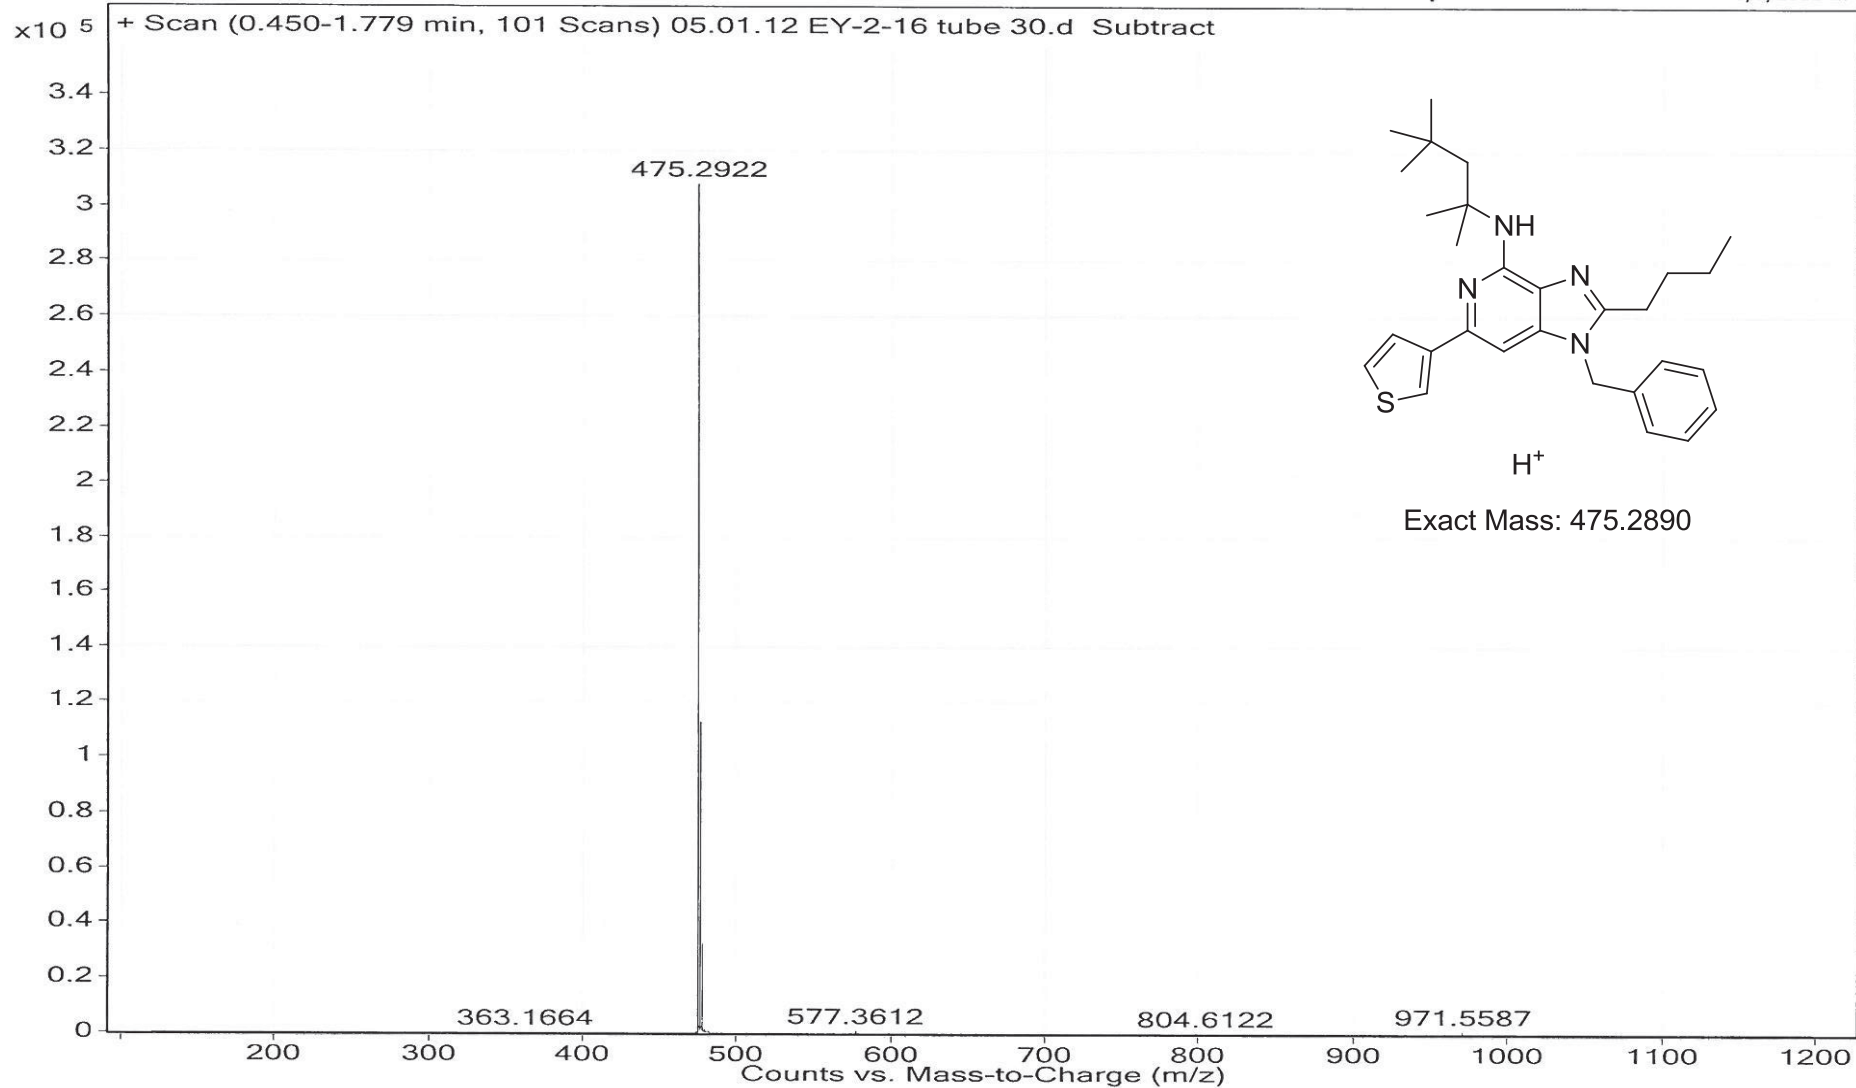



# 23f <sup>1</sup>H NMR

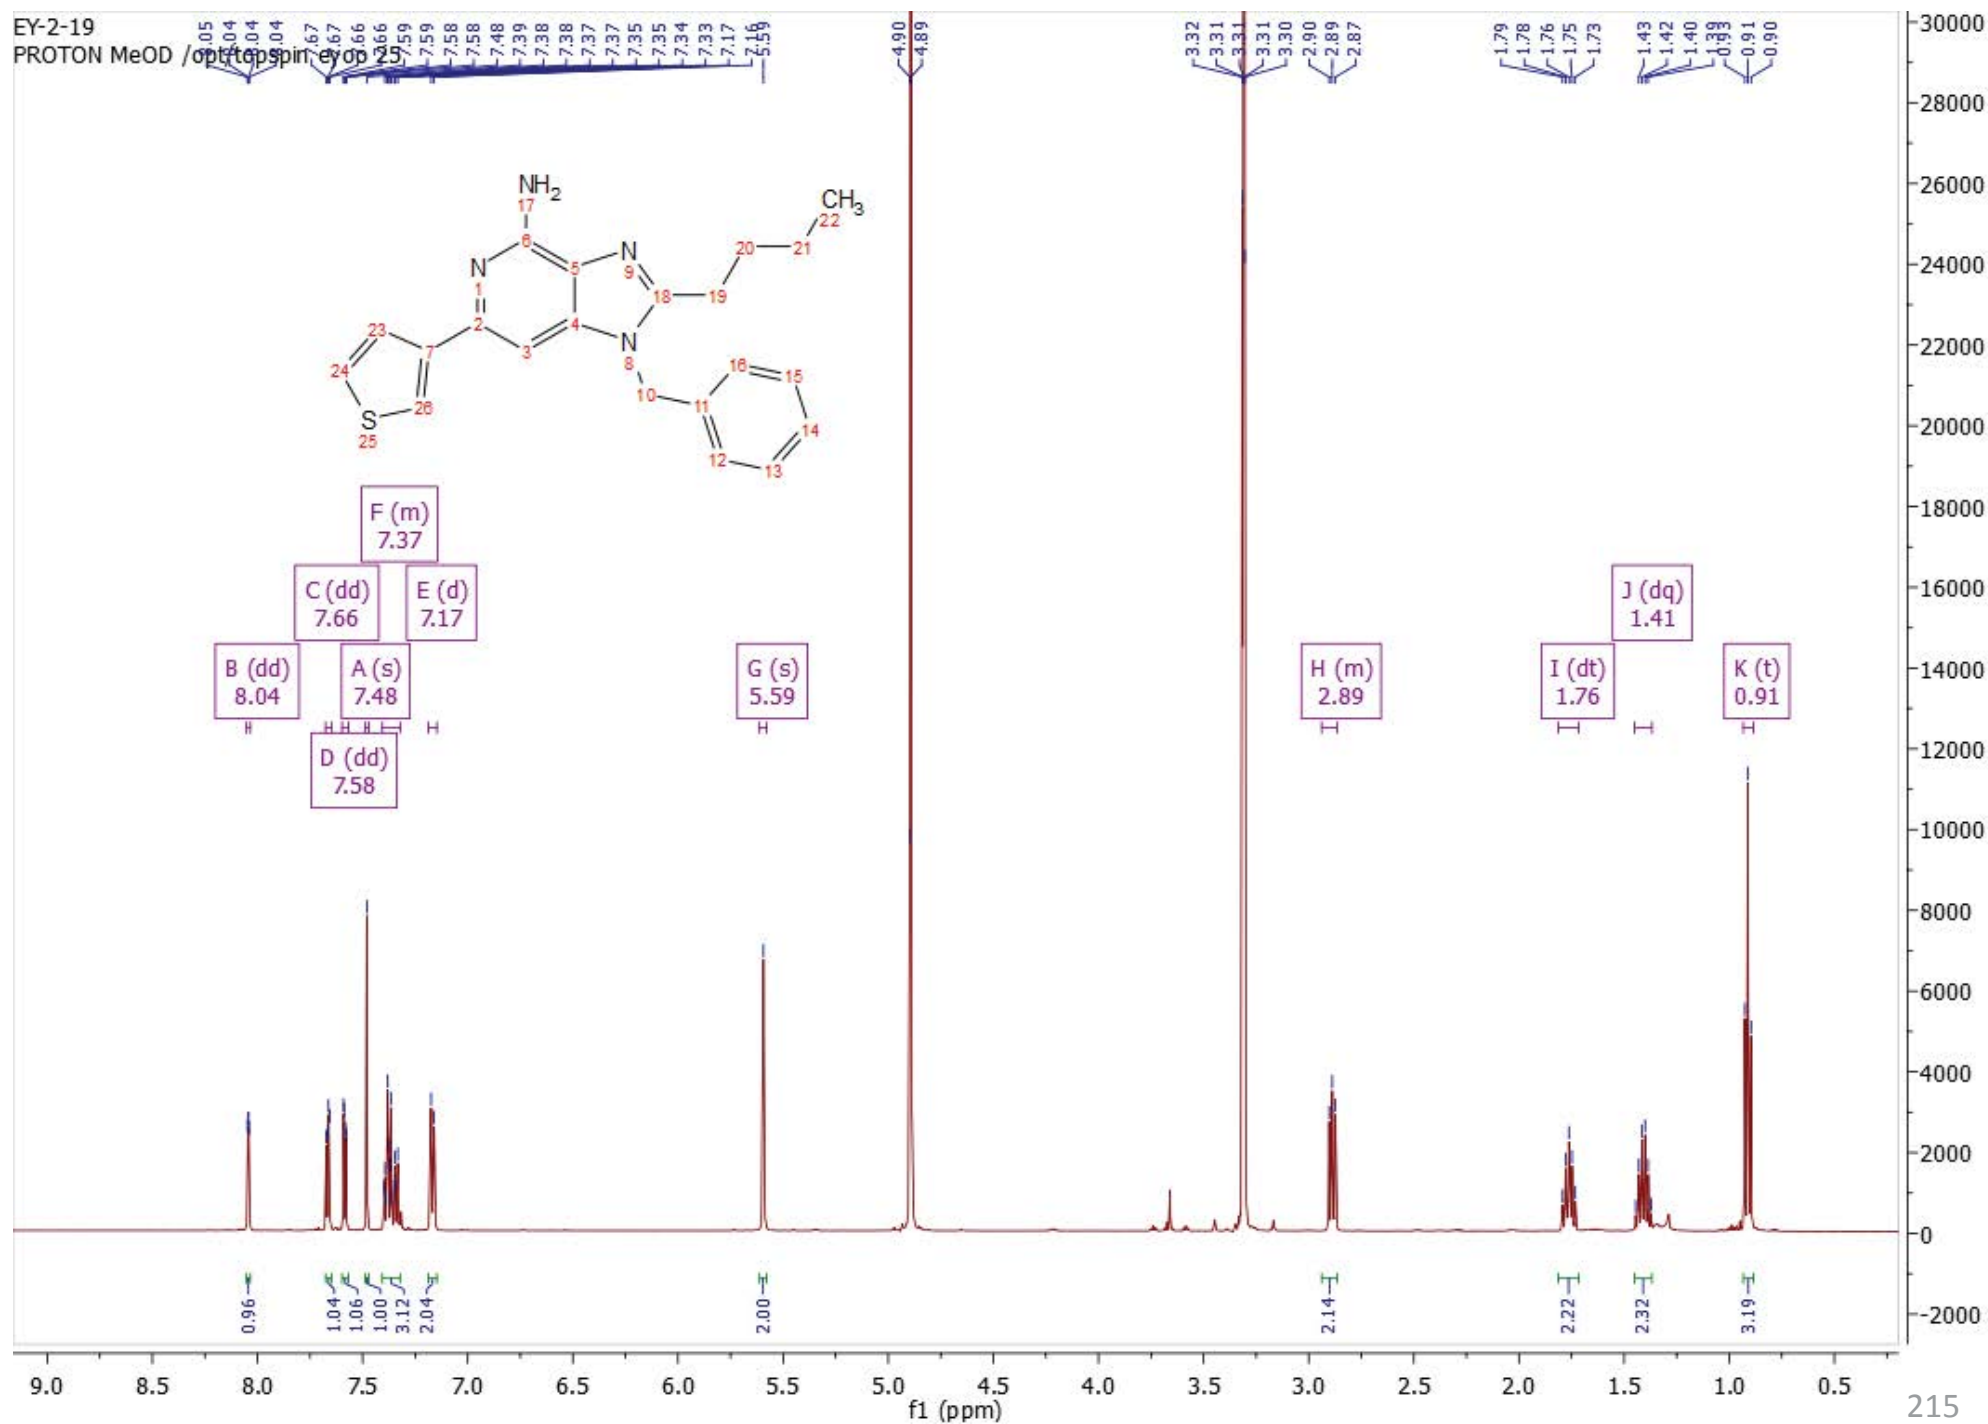



# **23f** <sup>13</sup>C NMR

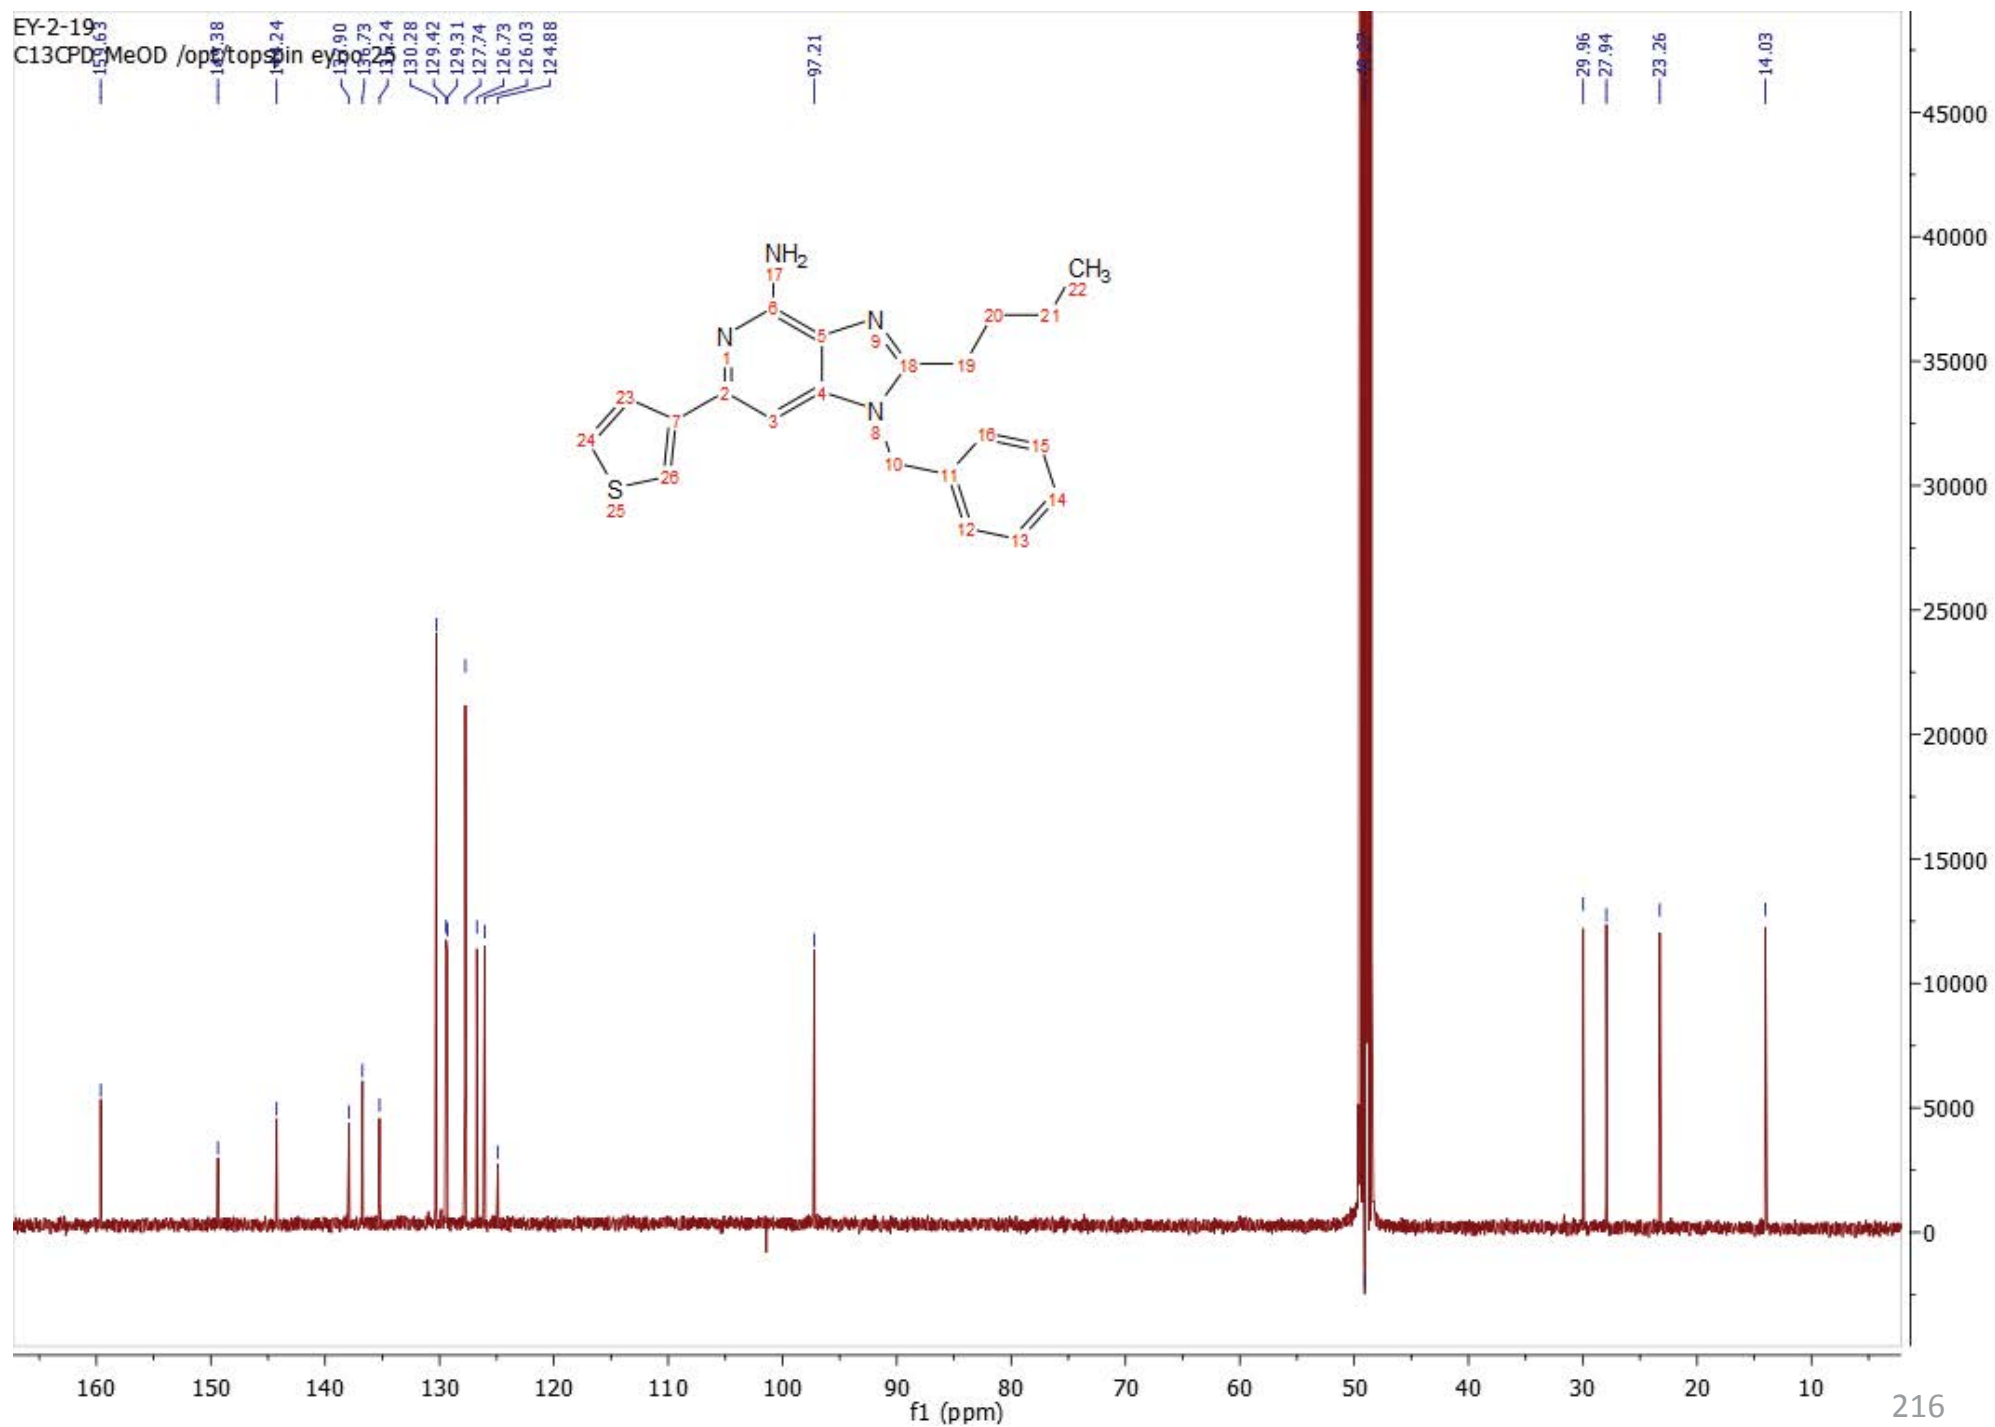

# 23f MS

|               |                    |             |                      |                 |              |                        |                     |
|---------------|--------------------|-------------|----------------------|-----------------|--------------|------------------------|---------------------|
| Sample Name   | 05.01.12 EY-2-19   | Position    | Vial 1               | Instrument Name | Instrument 1 | User Name              |                     |
| Inj Vol       | -1                 | InjPosition |                      | SampleType      | Sample       | IRM Calibration Status | Success             |
| Data Filename | 05.01.12 EY-2-19.d | ACQ Method  | Water-ACN Infusion M | Comment         |              | Acquired Time          | 5/1/2012 5:14:50 PM |

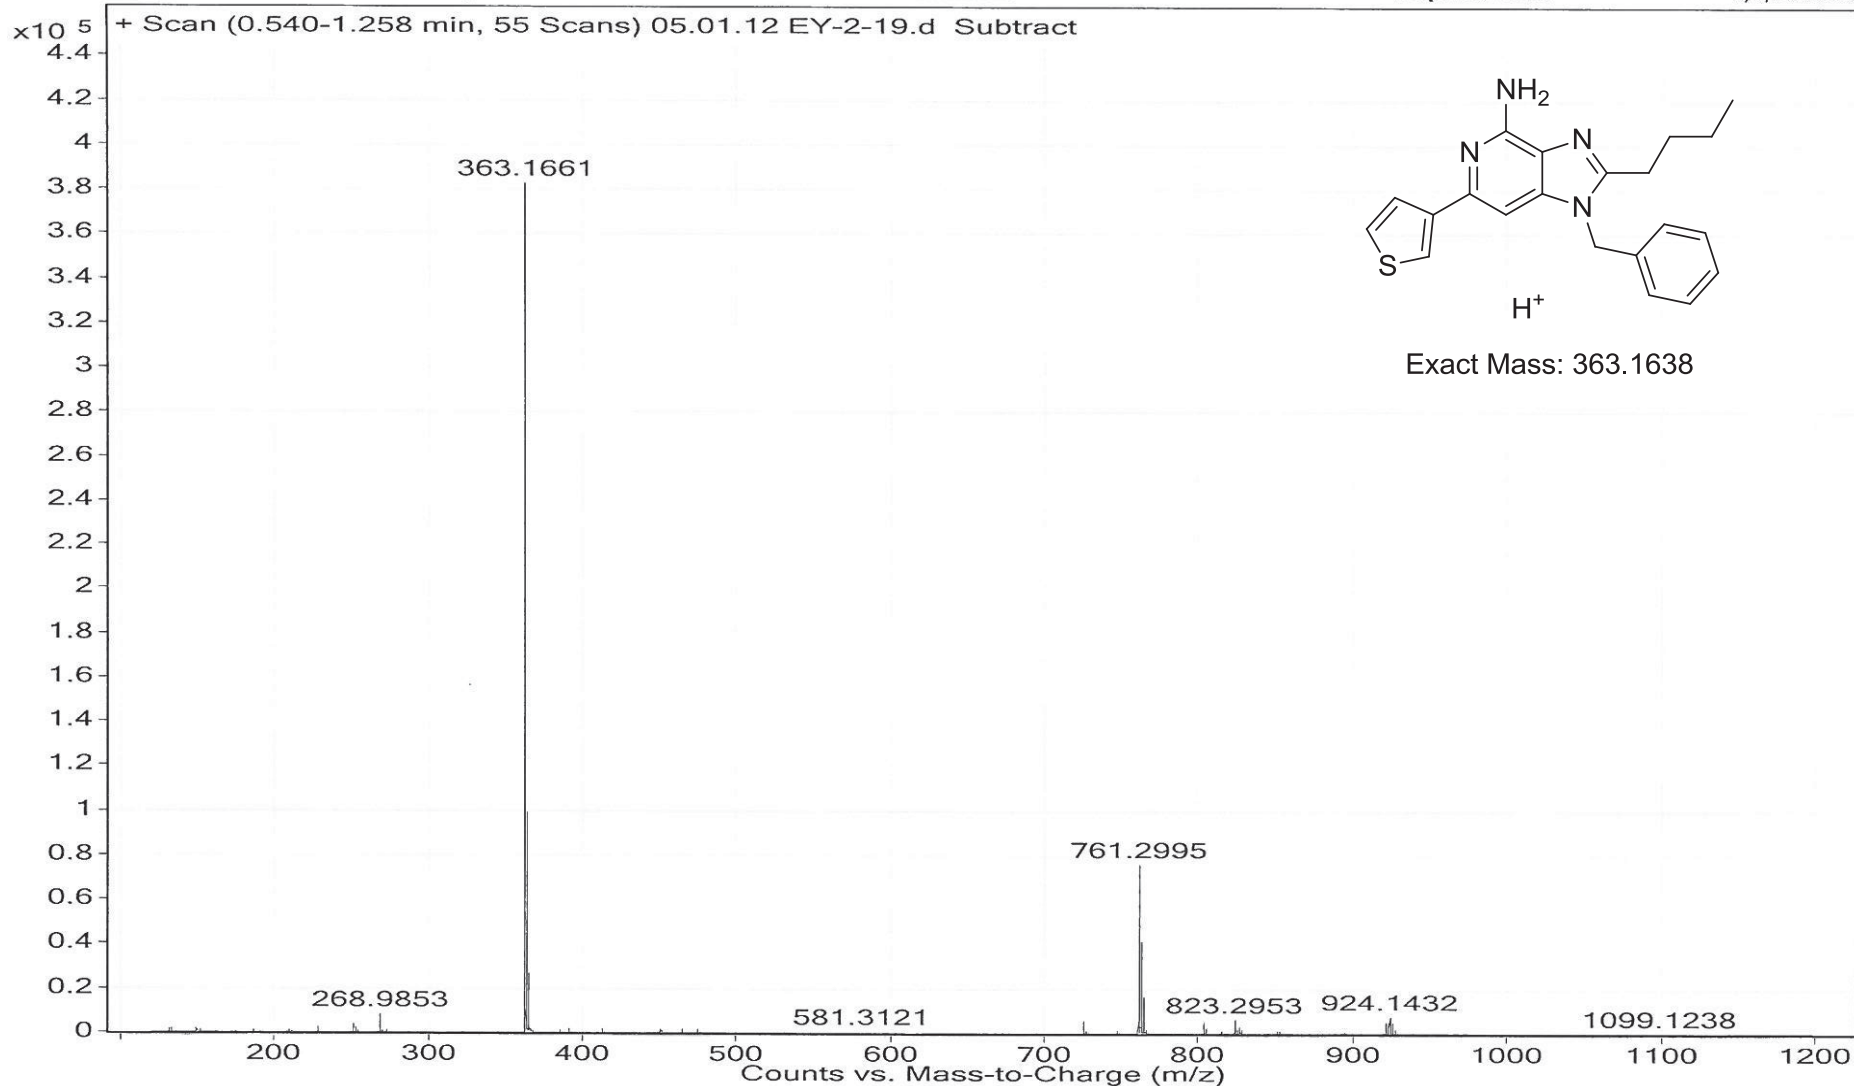

## 23f LC-MS

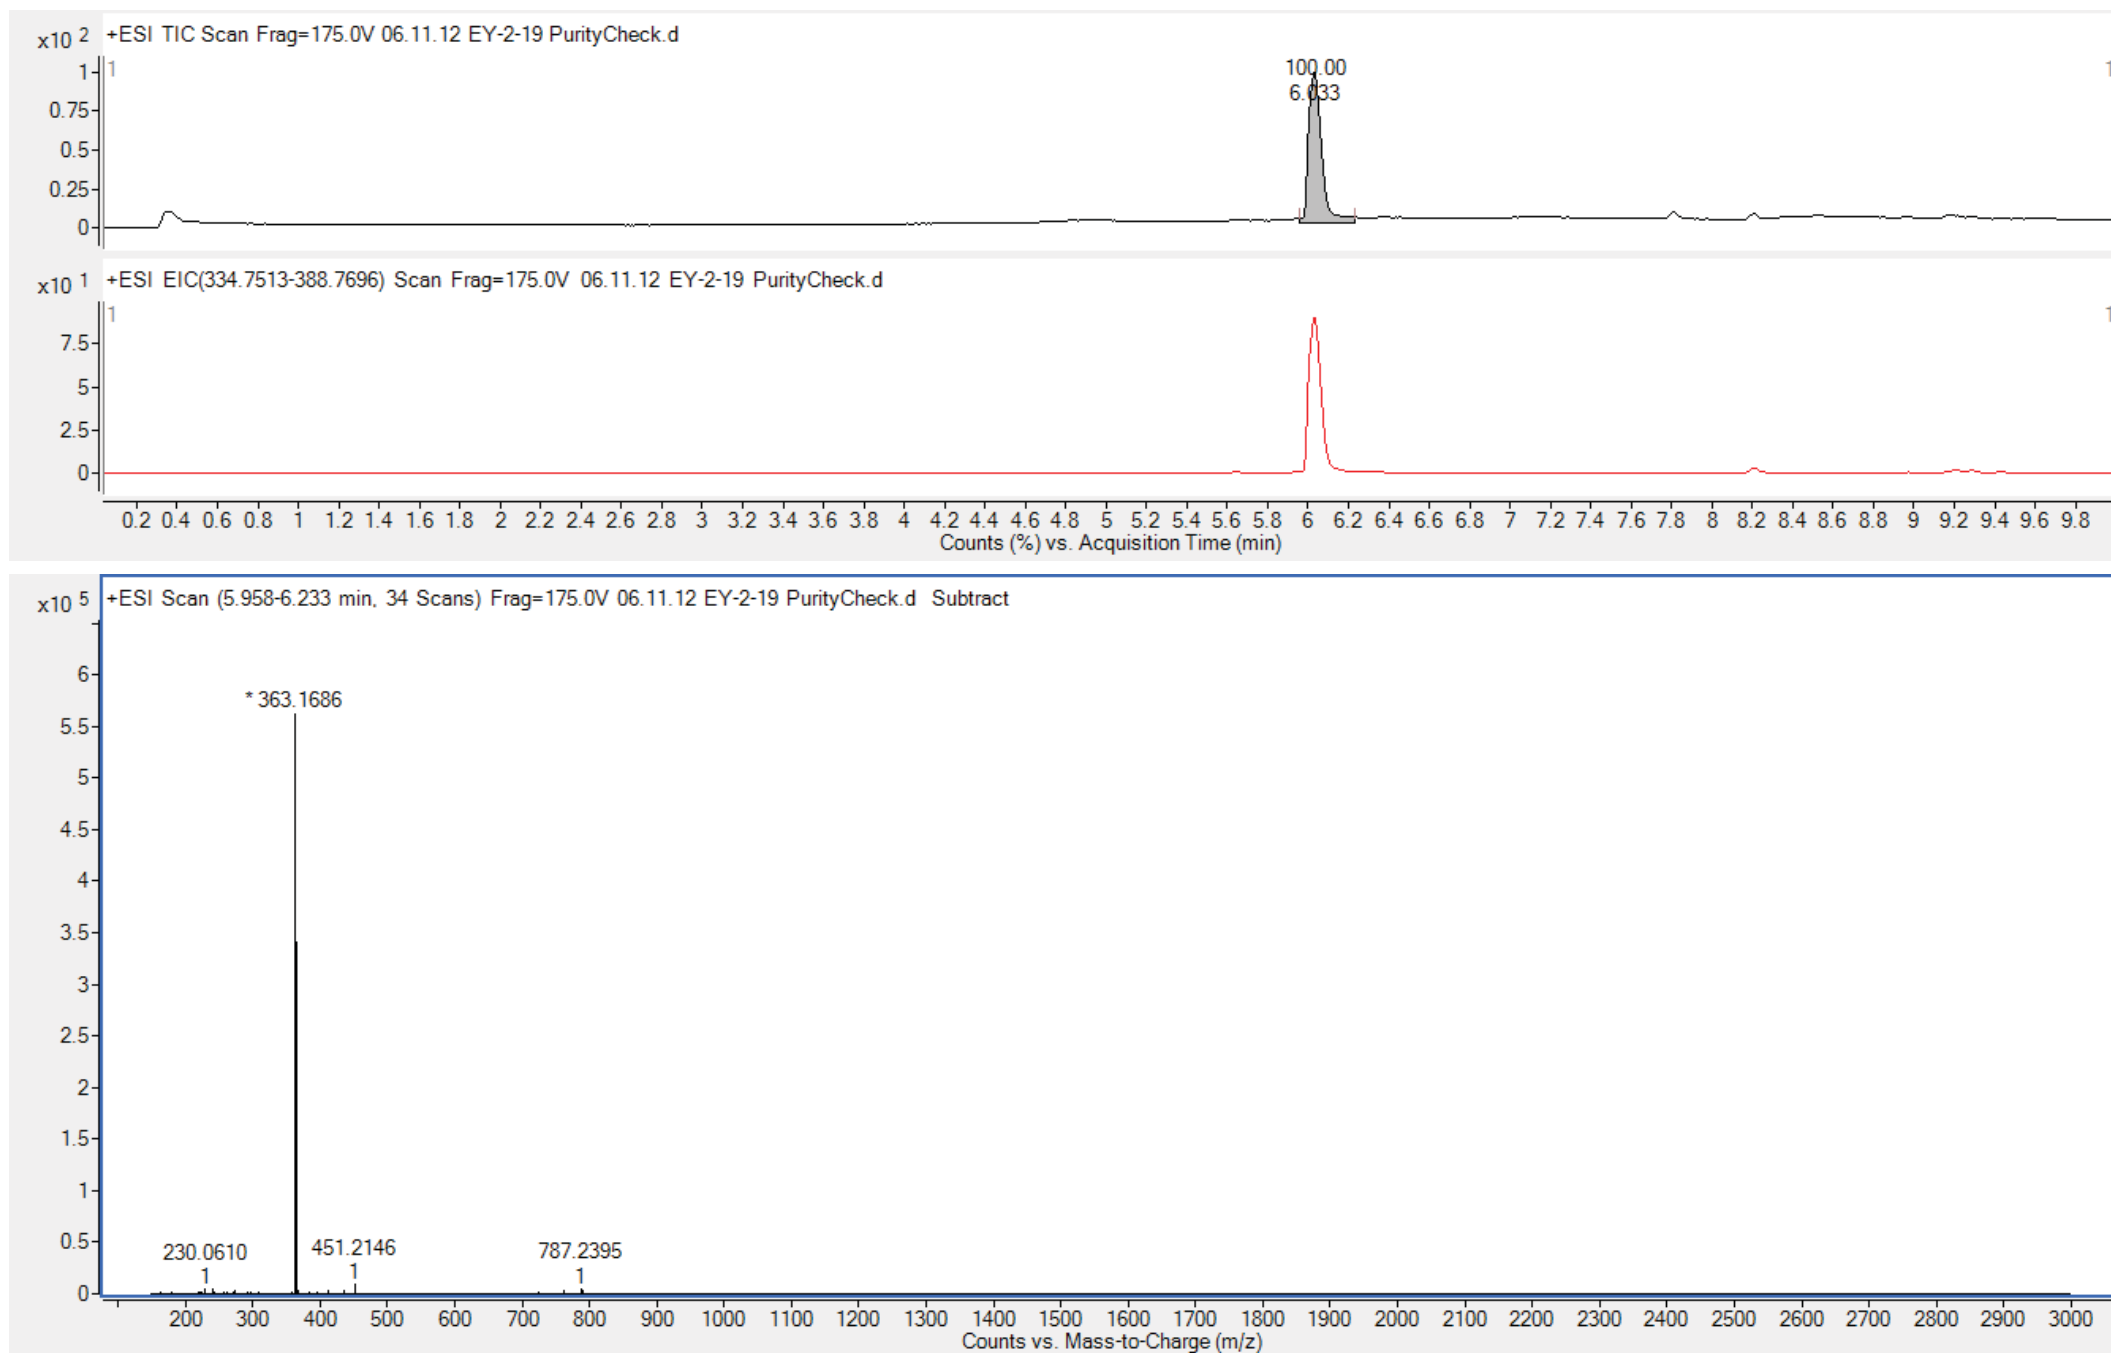

# 20g <sup>1</sup>H NMR

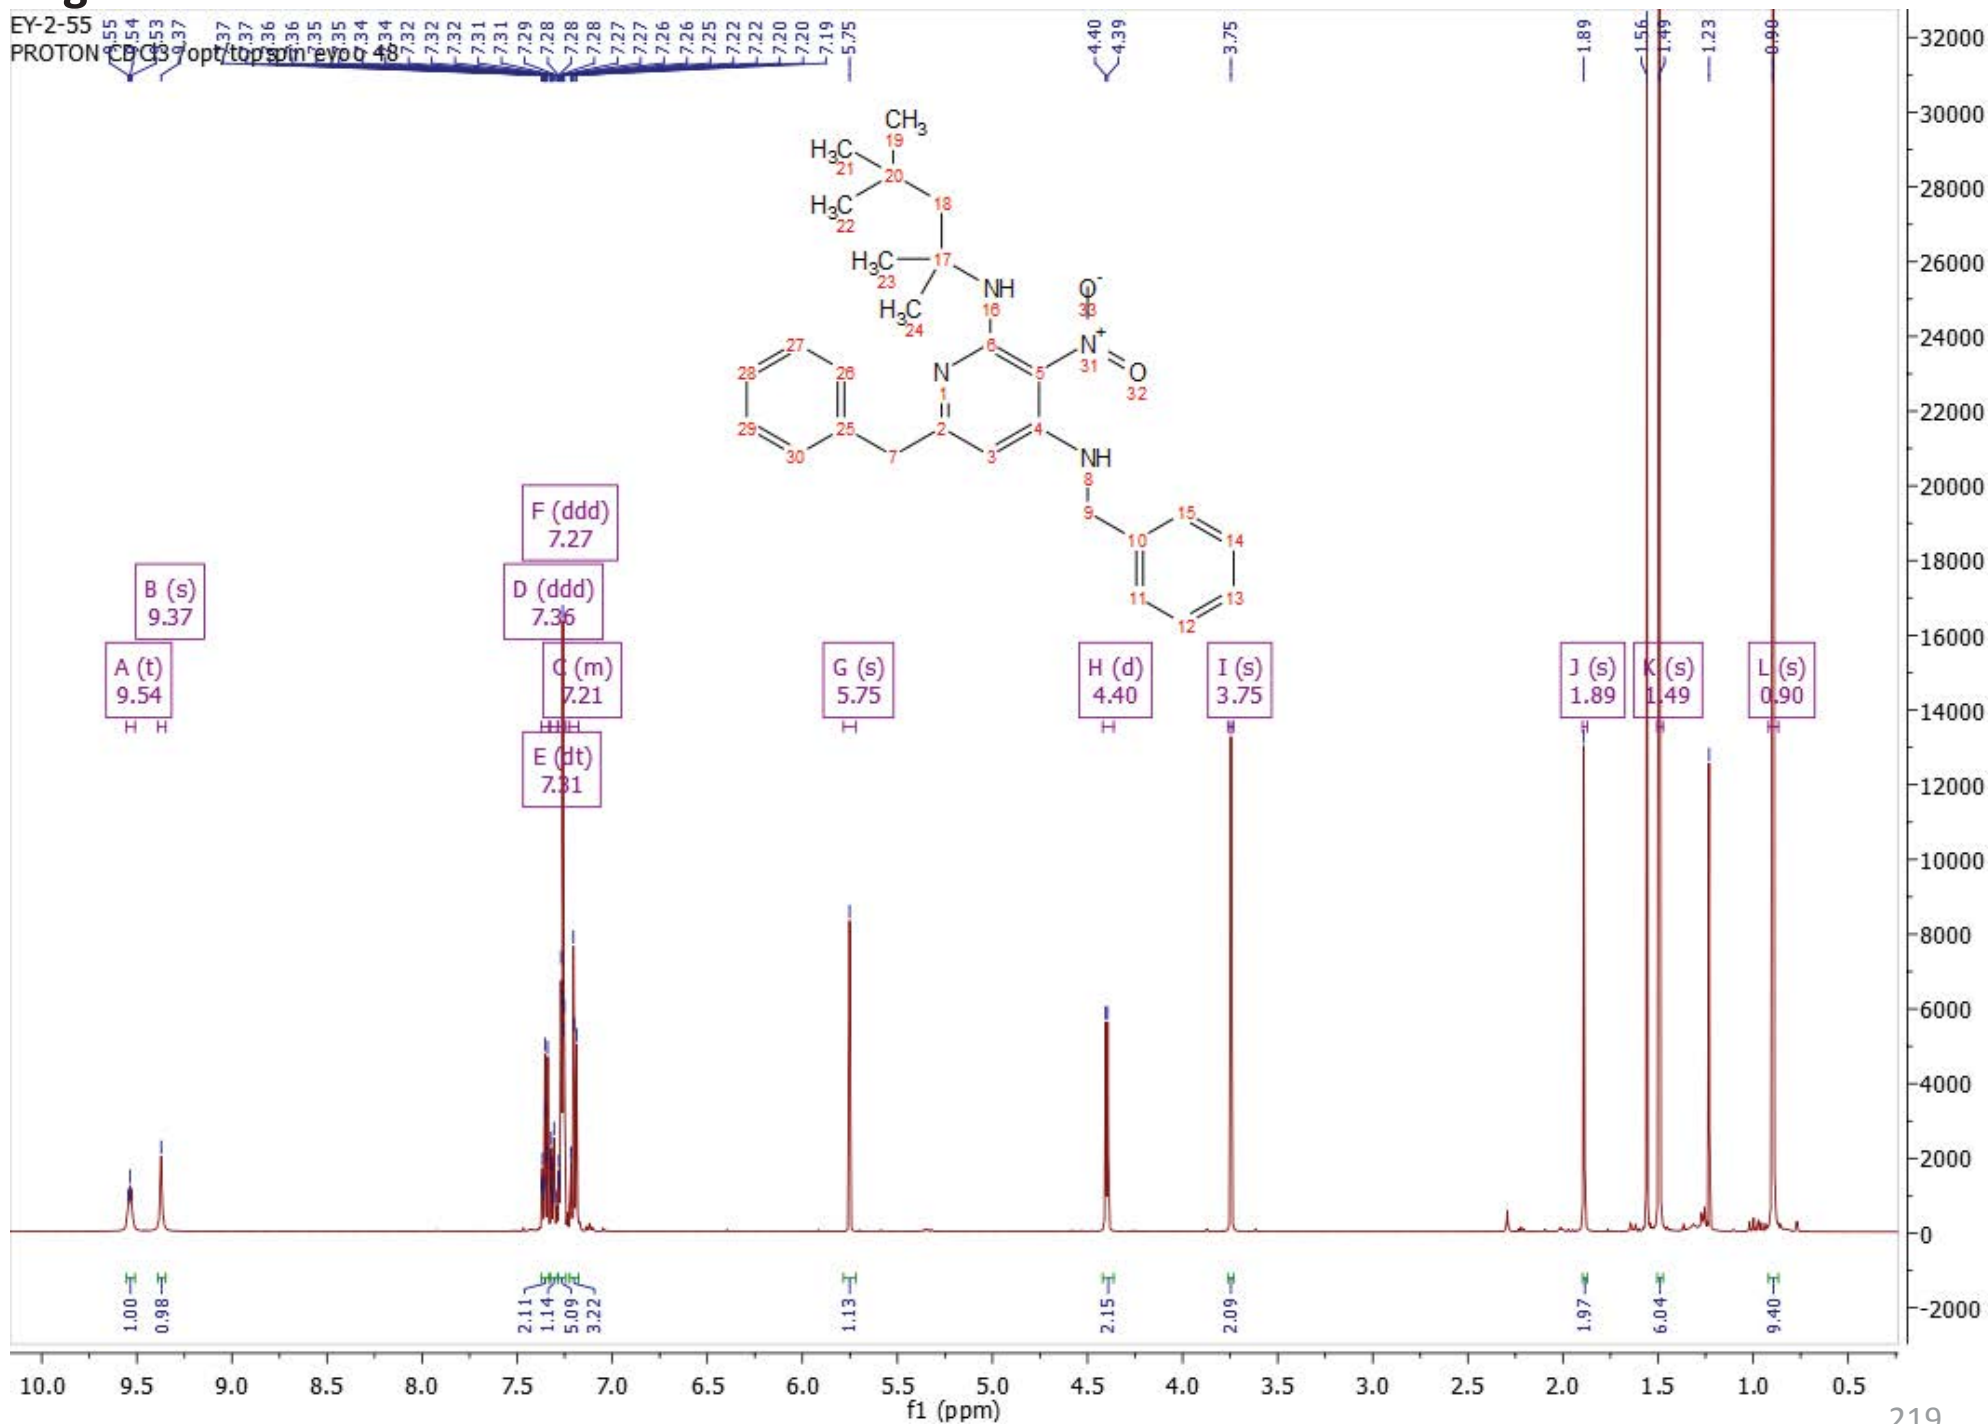

# 20g <sup>13</sup>C NMR

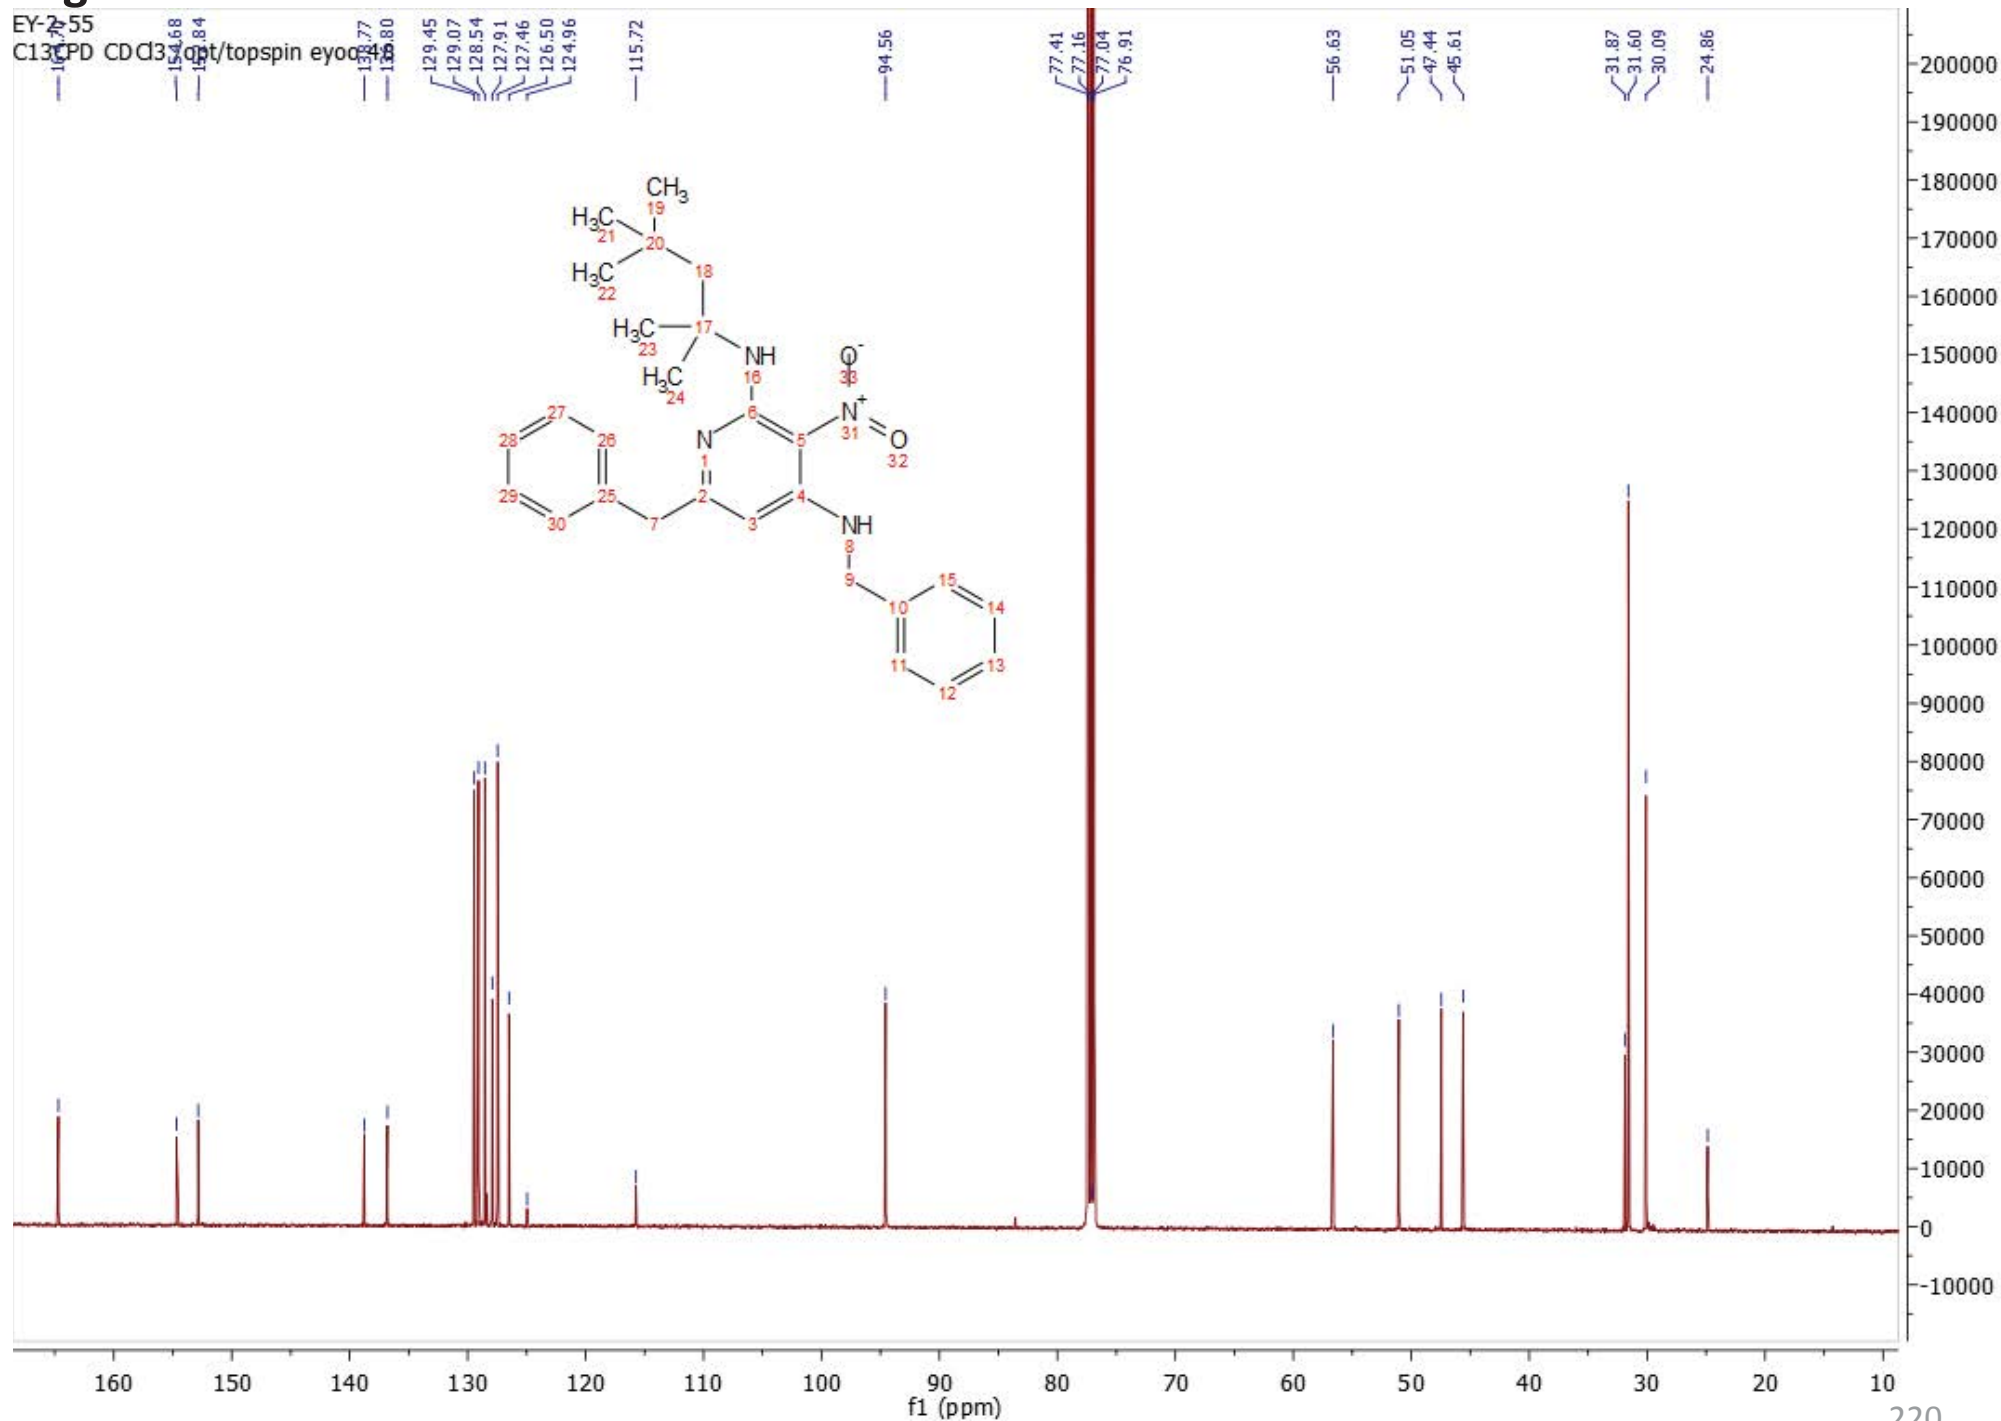

# 20g MS

|               |                      |             |                      |                 |              |                        |                       |
|---------------|----------------------|-------------|----------------------|-----------------|--------------|------------------------|-----------------------|
| Sample Name   | 05.24.12 EY-2-55 tub | Position    | Vial 1               | Instrument Name | Instrument 1 | User Name              |                       |
| Inj Vol       | -1                   | InjPosition |                      | SampleType      | Sample       | IRM Calibration Status | Success               |
| Data Filename | 05.24.12 EY-2-55 tub | ACQ Method  | Water-ACN Infusion M | Comment         |              | Acquired Time          | 5/24/2012 10:42:08 AM |

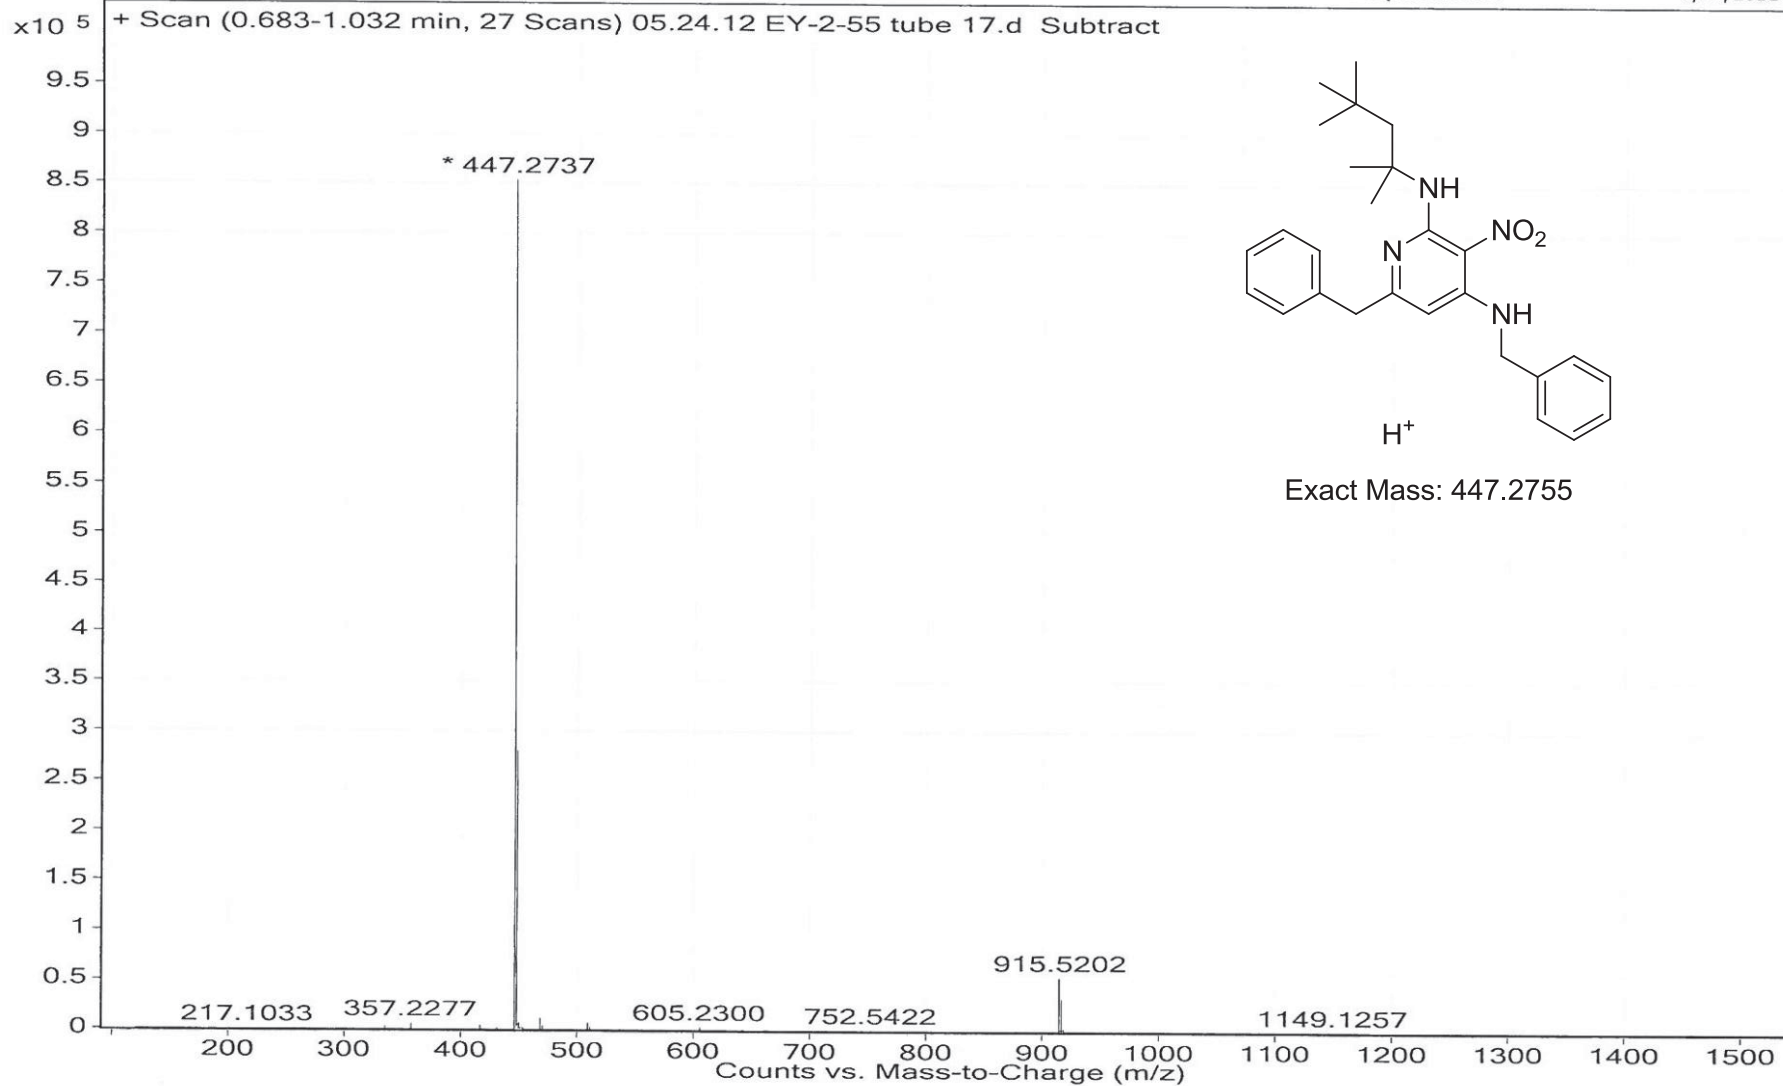

# 21g MS

|               |                      |             |                      |                 |              |                        |                       |
|---------------|----------------------|-------------|----------------------|-----------------|--------------|------------------------|-----------------------|
| Sample Name   | 05.24.12 EY-2-57 tub | Position    | Vial 1               | Instrument Name | Instrument 1 | User Name              |                       |
| Inj Vol       | -1                   | InjPosition |                      | SampleType      | Sample       | IRM Calibration Status | Success               |
| Data Filename | 05.24.12 EY-2-57 tub | ACQ Method  | Water-ACN Infusion M | Comment         |              | Acquired Time          | 5/24/2012 12:47:58 PM |

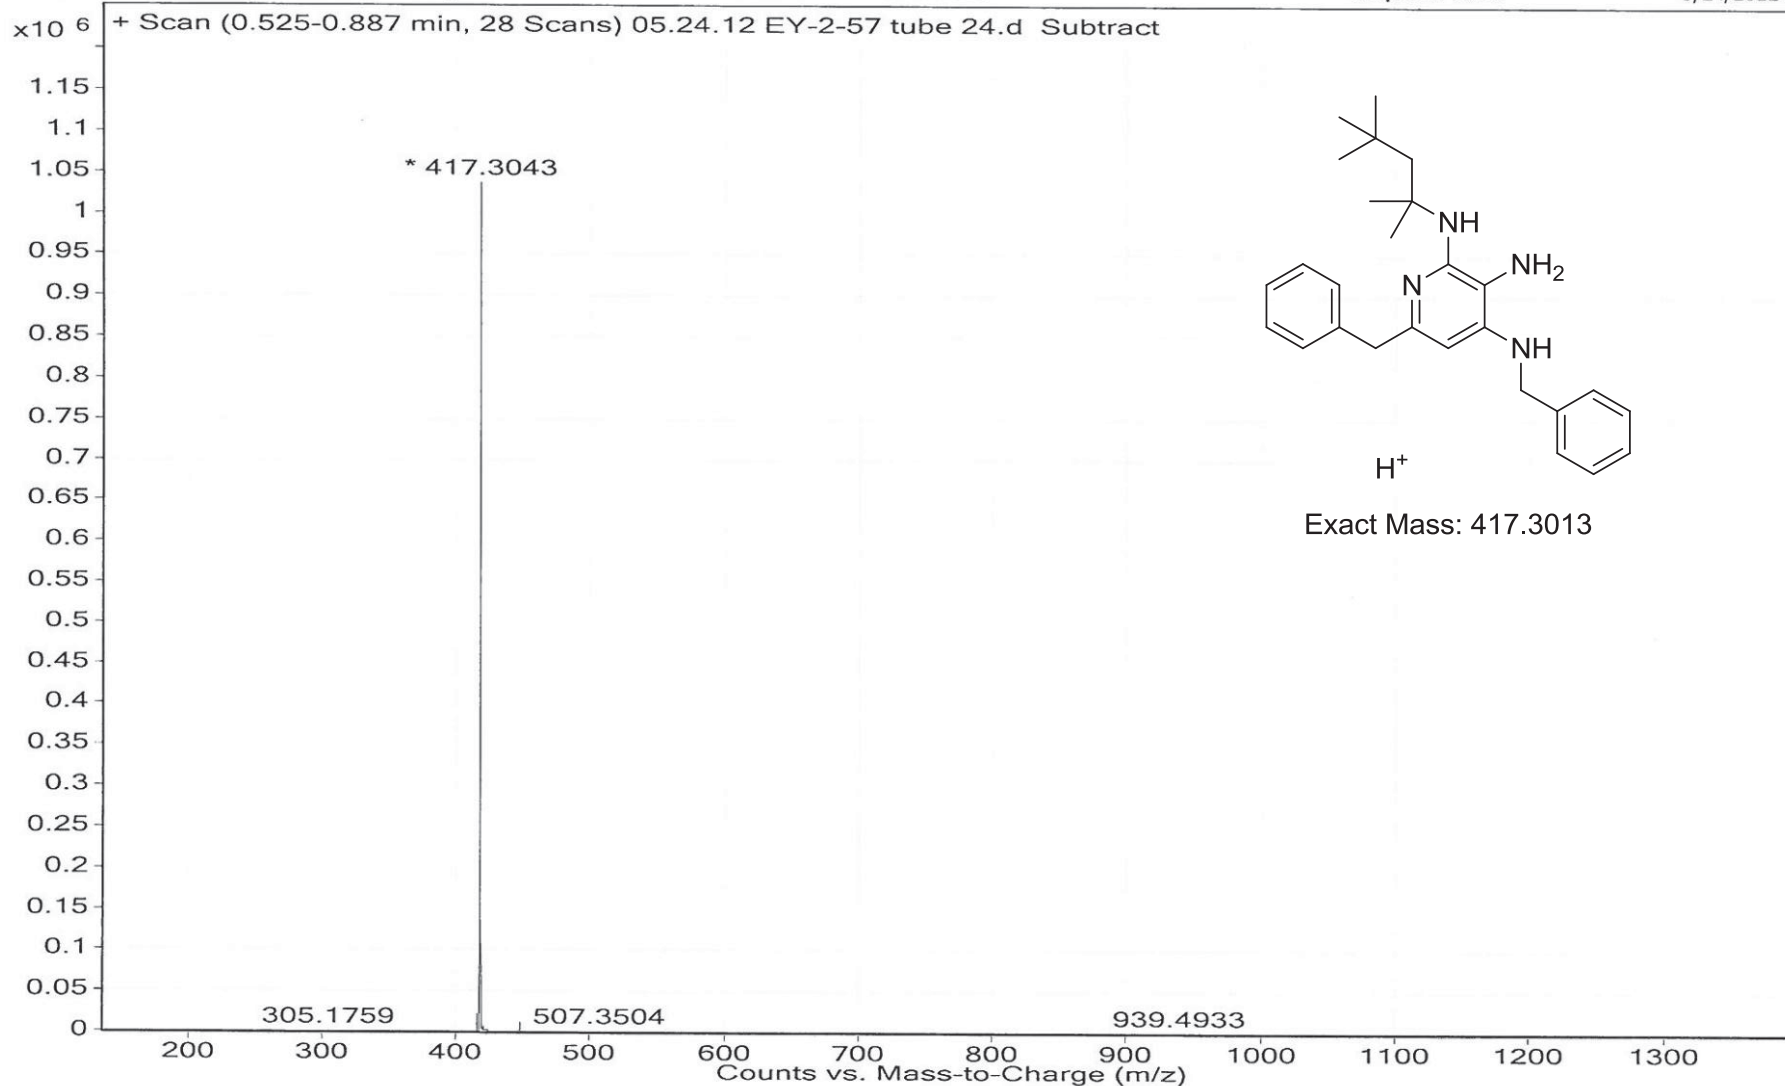



# 22g <sup>1</sup>H NMR

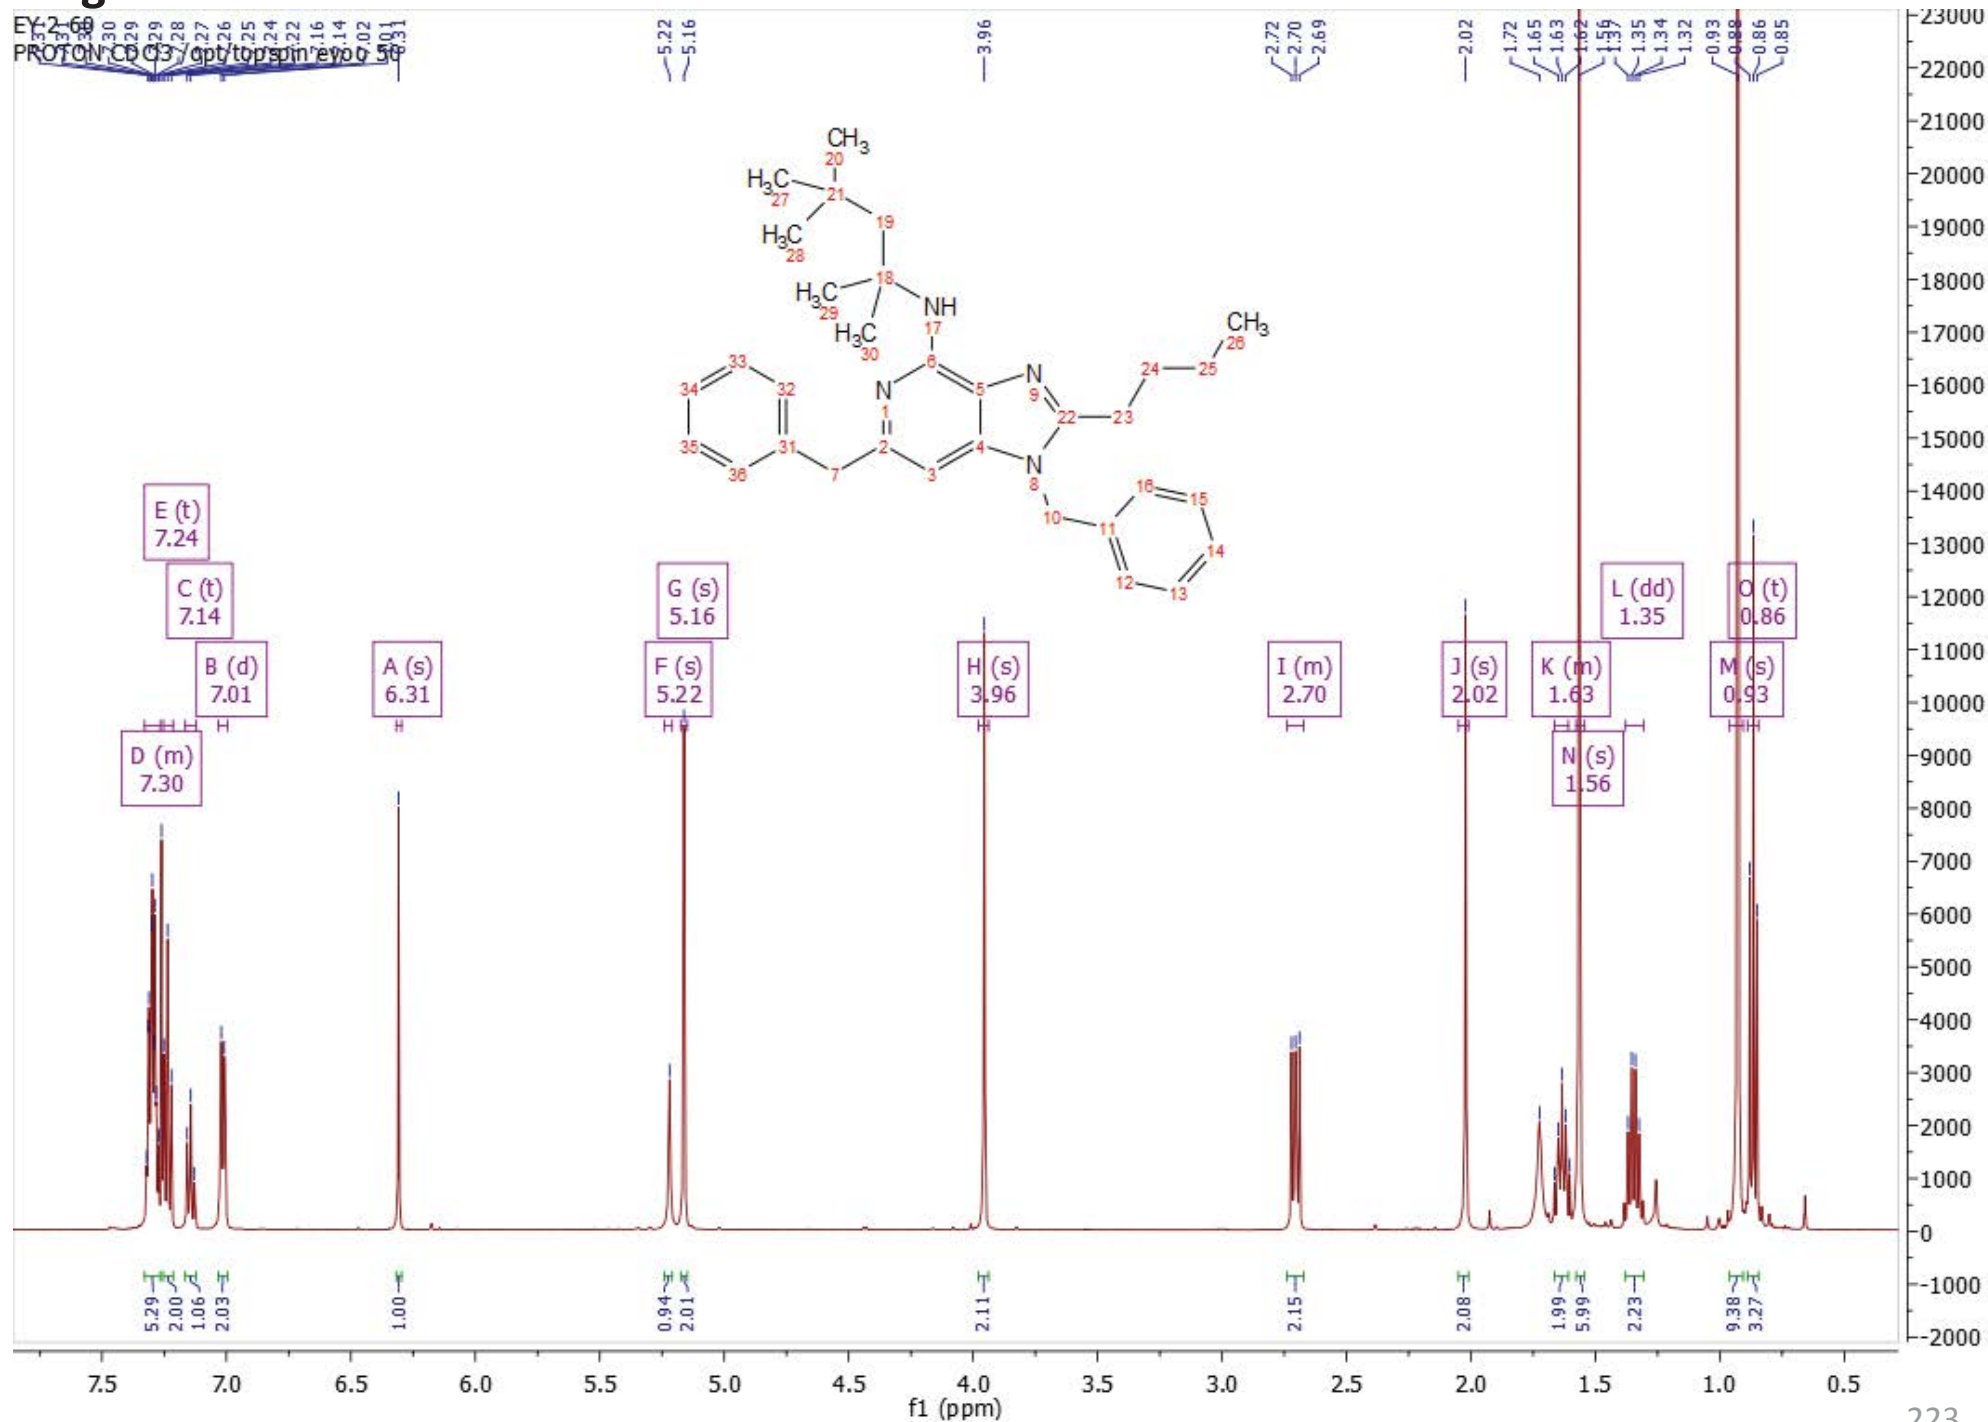

# 22g <sup>13</sup>C NMR

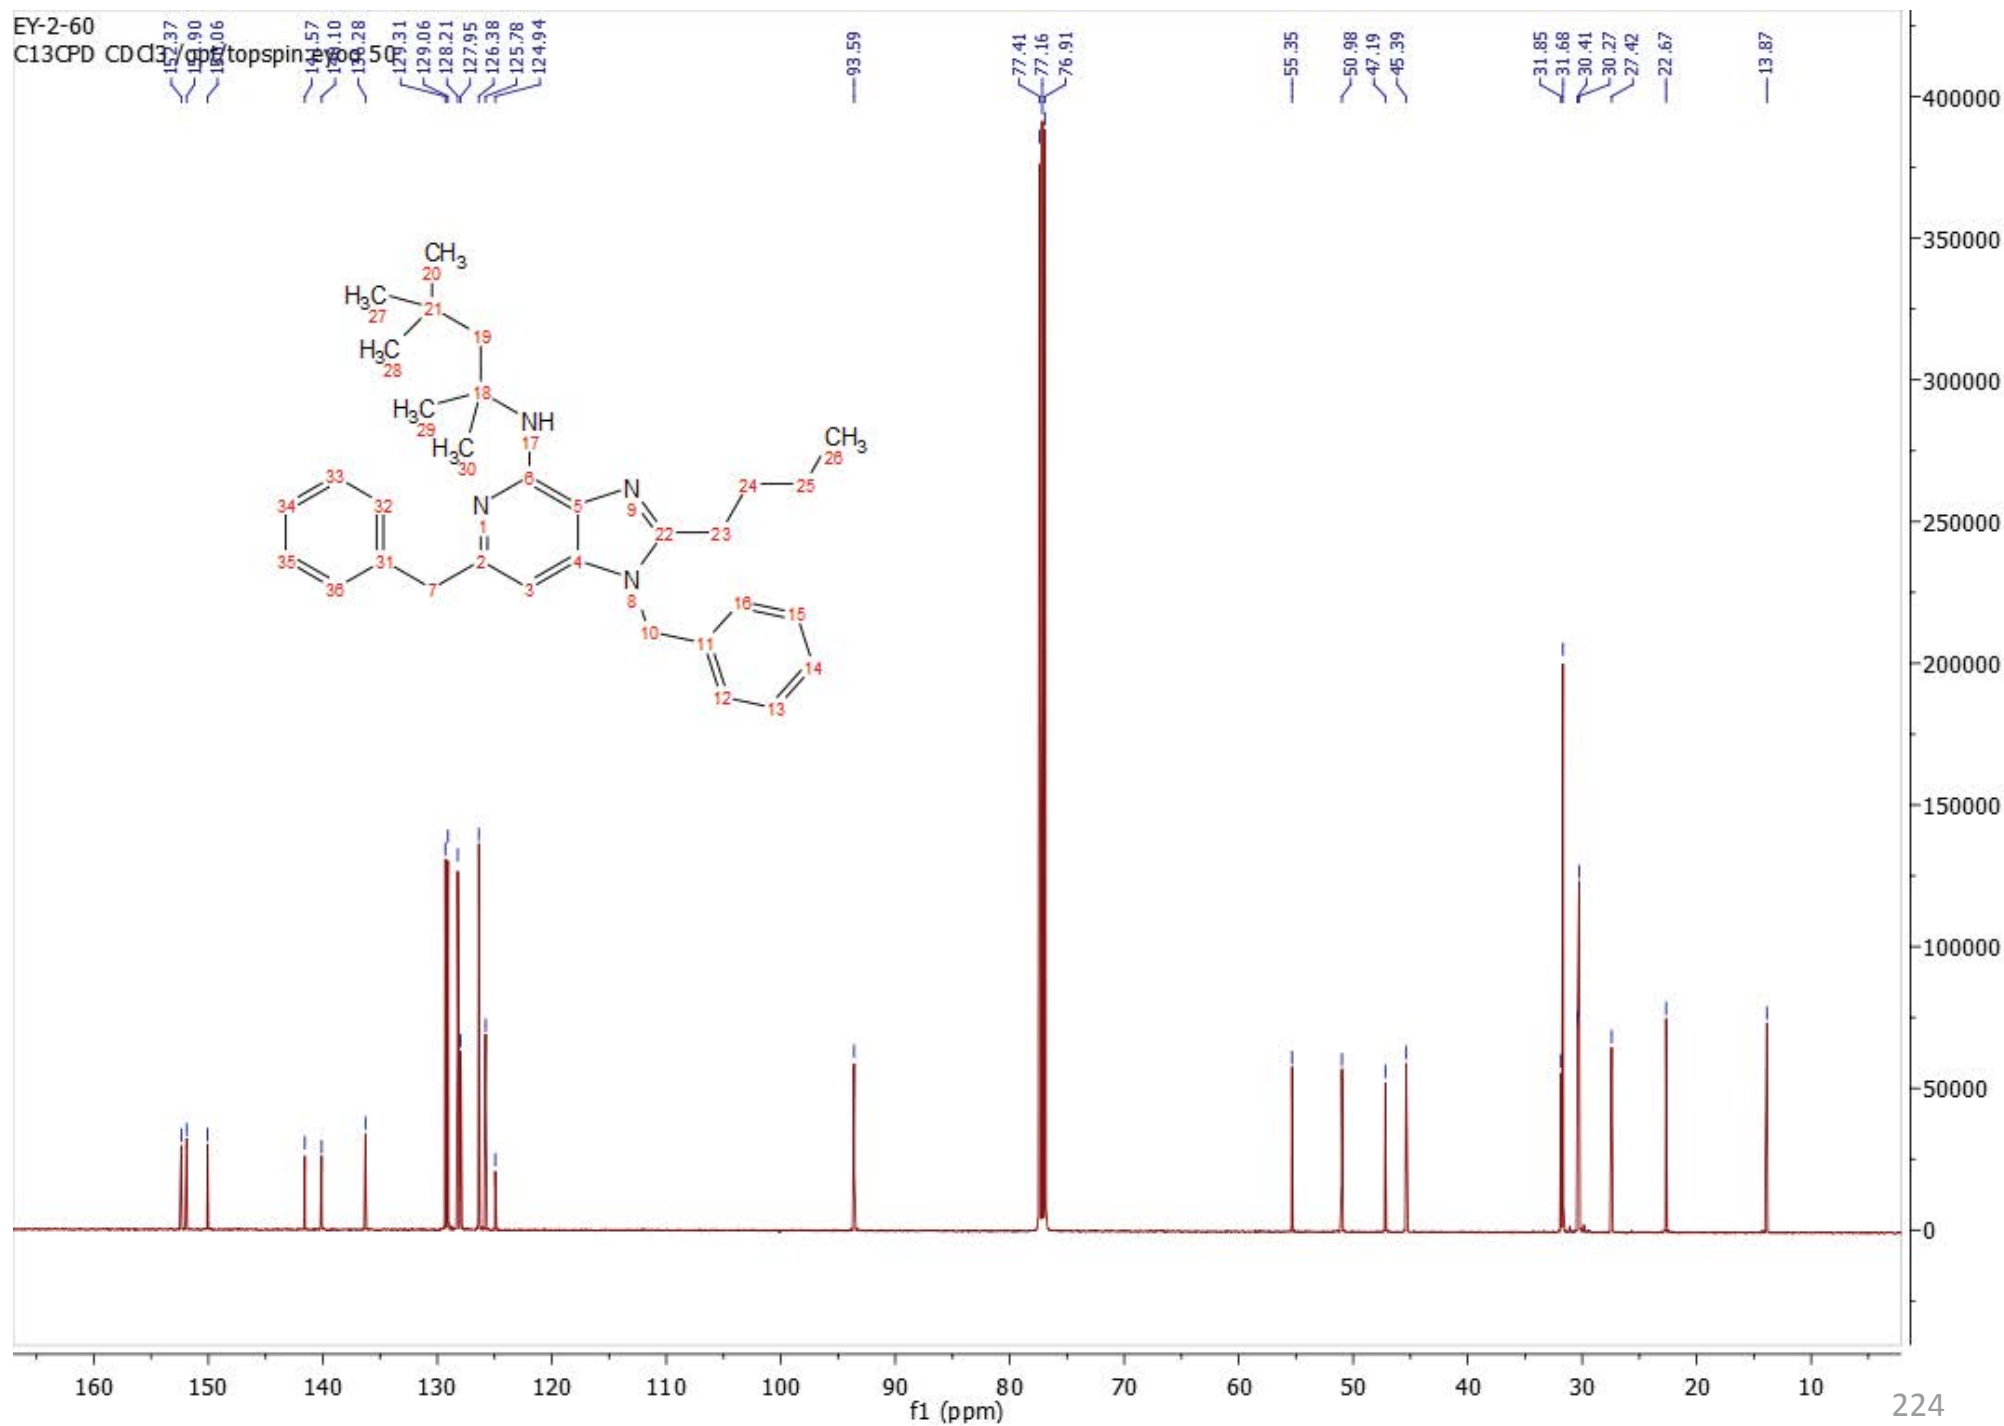

# 22g MS

|               |                      |             |                      |                 |              |                        |                       |
|---------------|----------------------|-------------|----------------------|-----------------|--------------|------------------------|-----------------------|
| Sample Name   | 05.25.12 EY-2-60 tub | Position    | Vial 1               | Instrument Name | Instrument 1 | User Name              |                       |
| Inj Vol       | -1                   | InjPosition |                      | SampleType      | Sample       | IRM Calibration Status | Success               |
| Data Filename | 05.25.12 EY-2-60 tub | ACQ Method  | Water-ACN Infusion M | Comment         |              | Acquired Time          | 5/25/2012 12:48:32 PM |

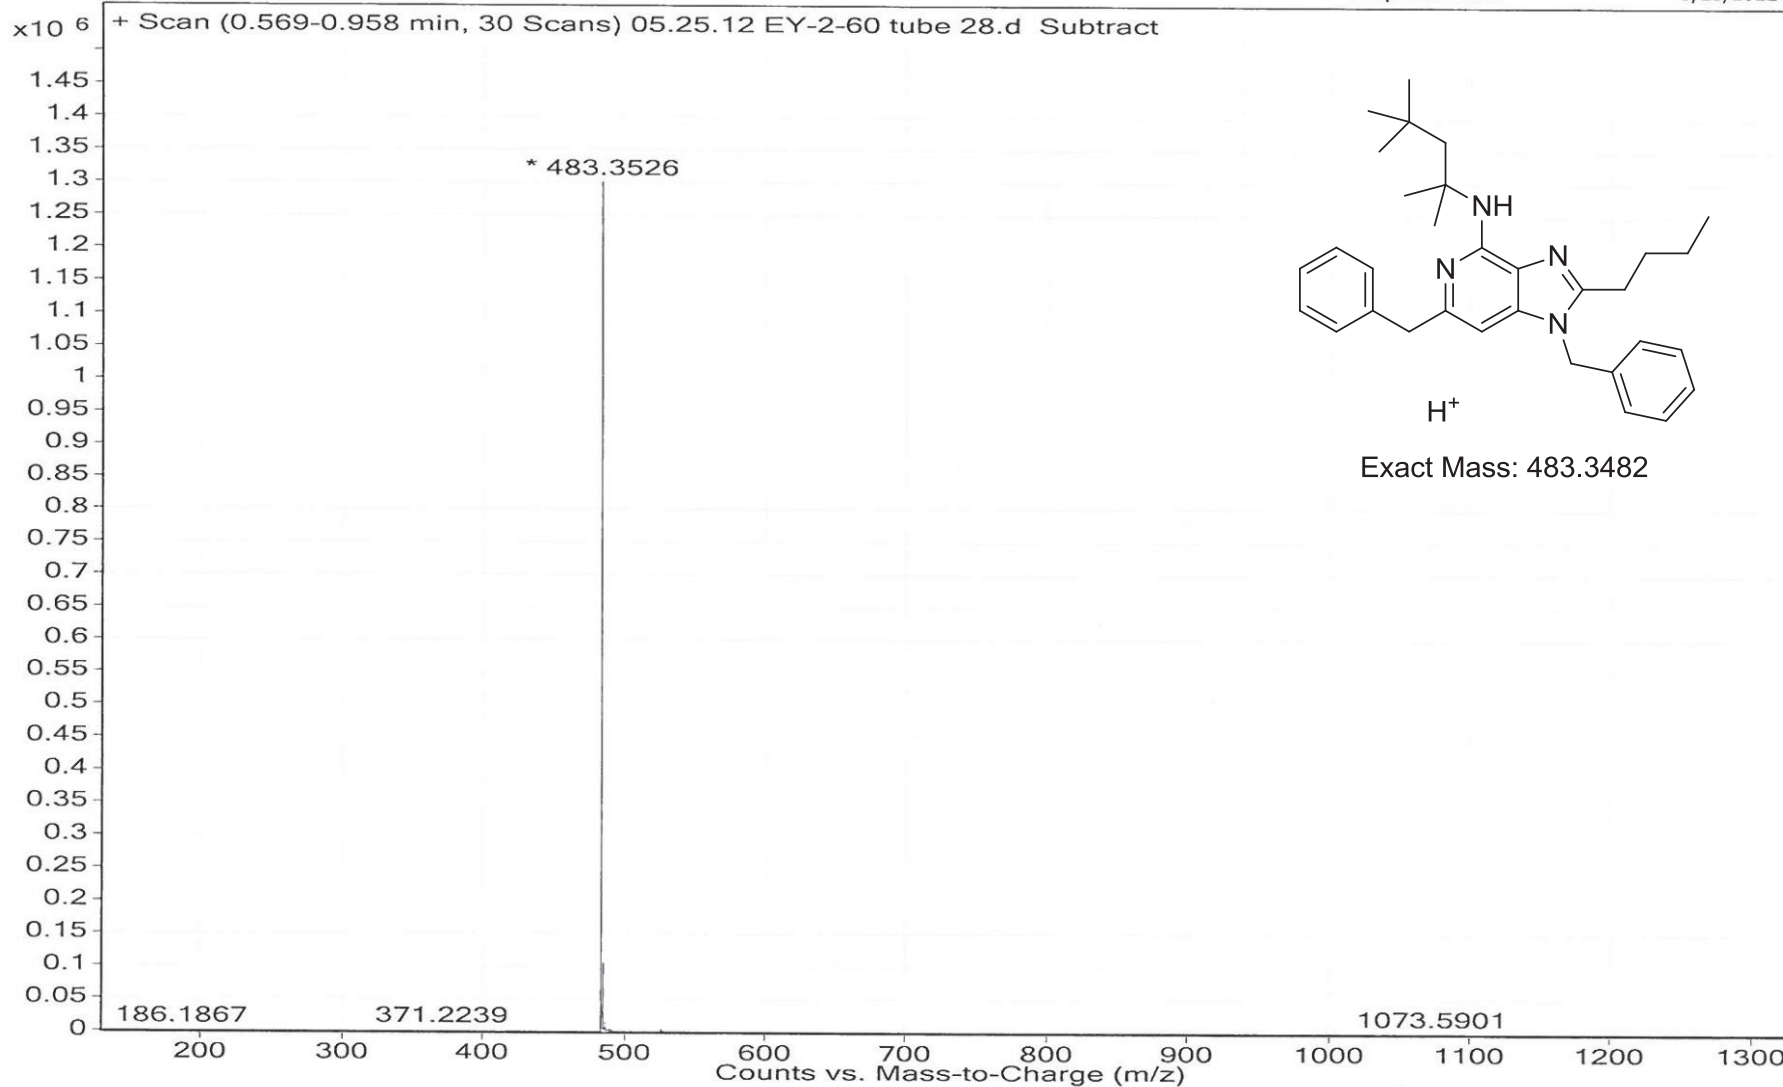

# 23g <sup>1</sup>H NMR

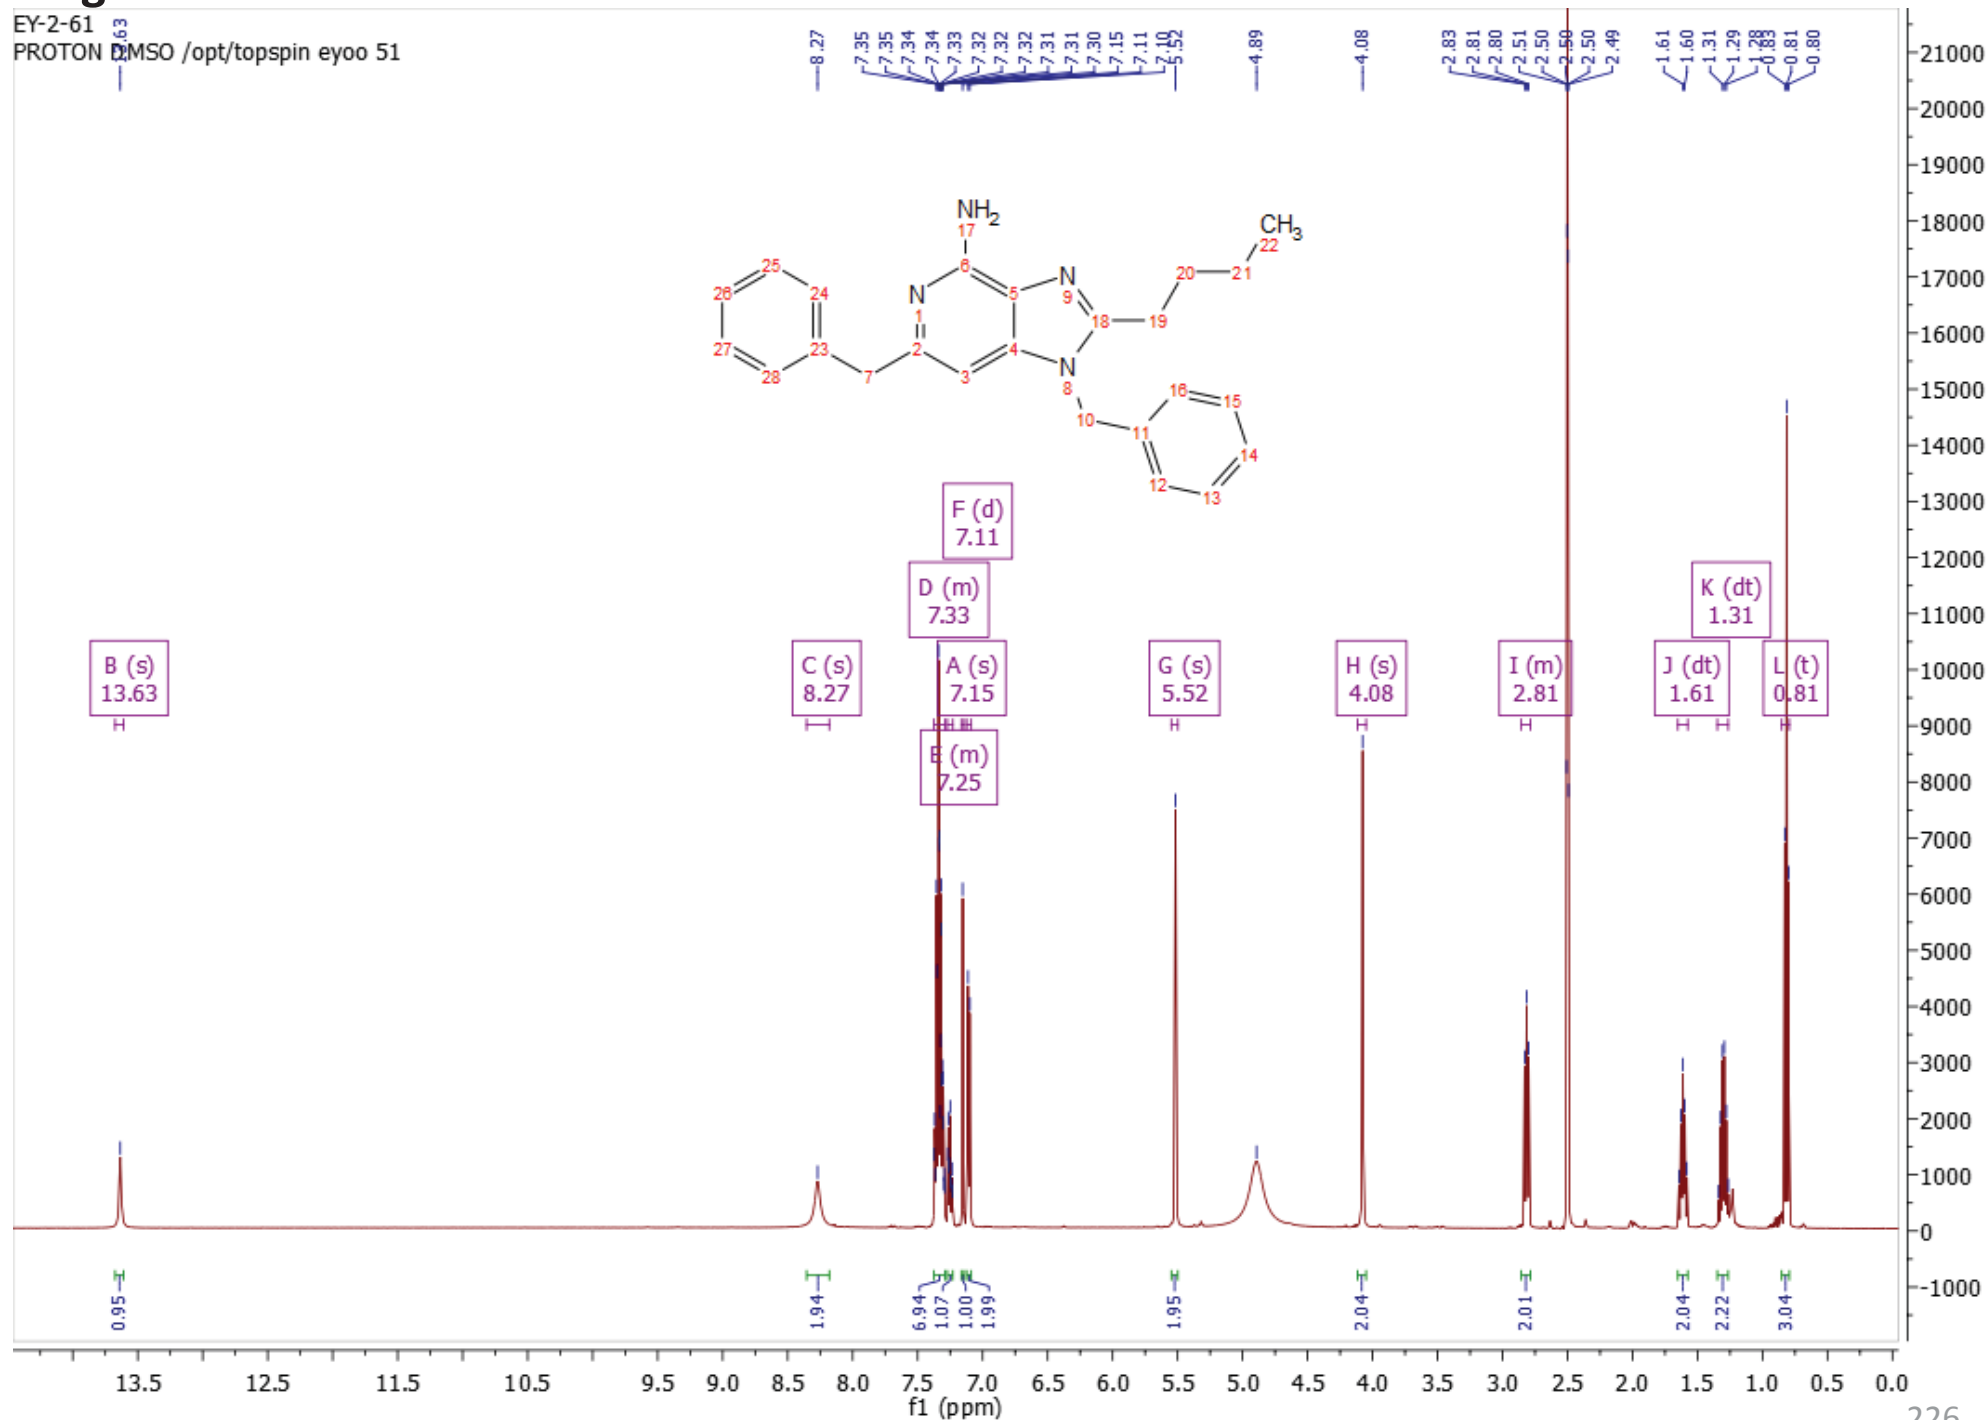

# 23g <sup>13</sup>C NMR

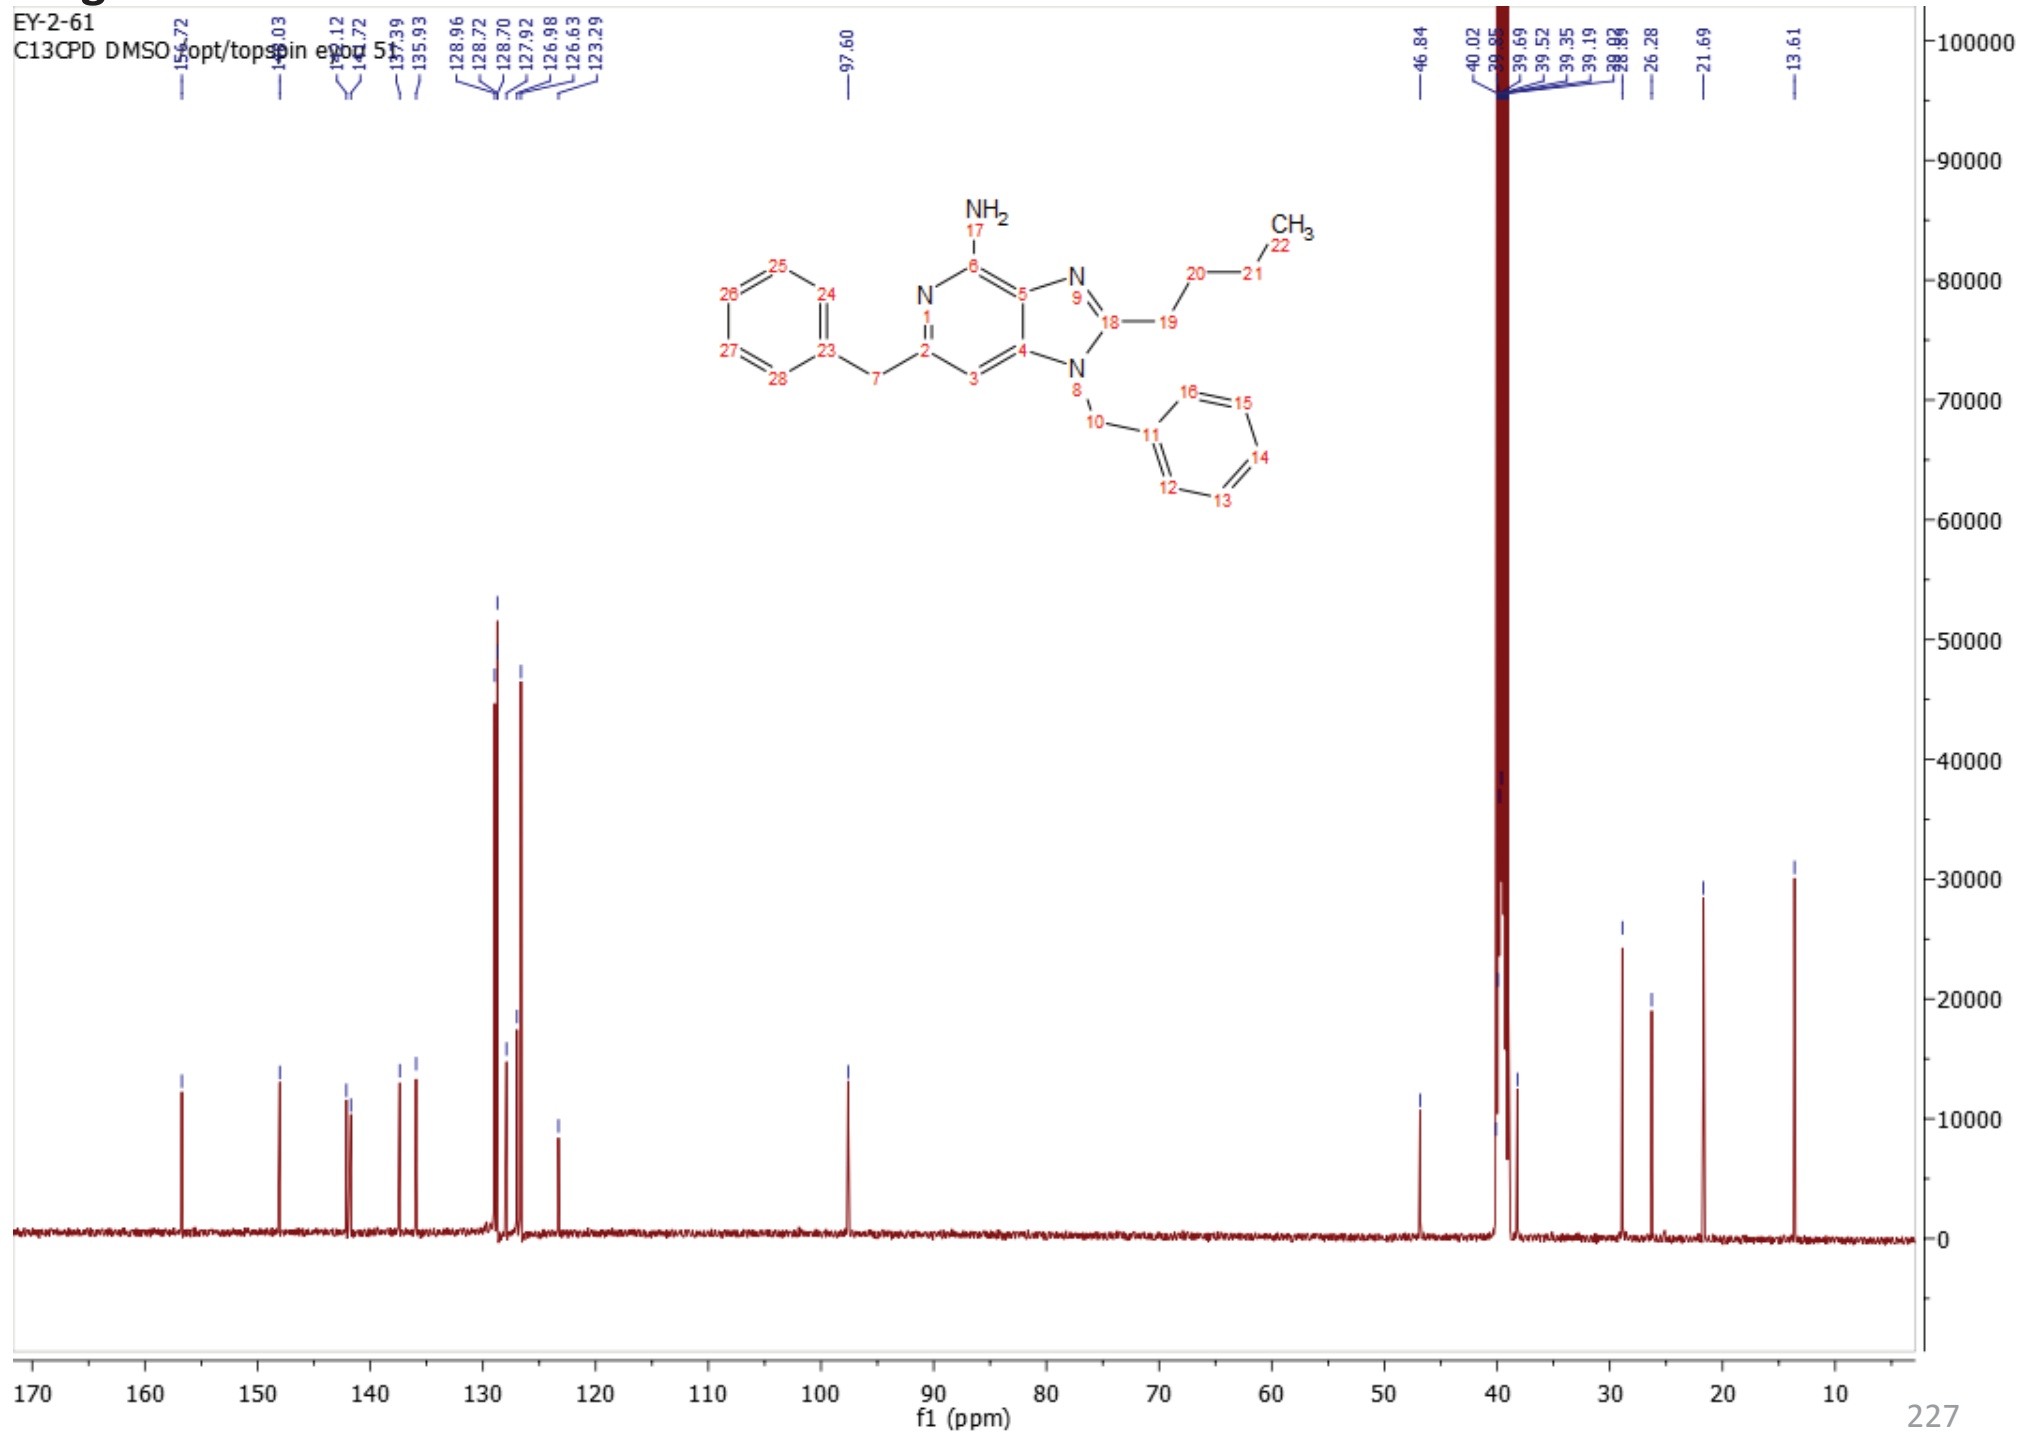

# 23g MS

|               |                    |             |                      |                 |              |                        |                      |
|---------------|--------------------|-------------|----------------------|-----------------|--------------|------------------------|----------------------|
| Sample Name   | 05.25.12 EY-2-61   | Position    | Vial 1               | Instrument Name | Instrument 1 | User Name              |                      |
| Inj Vol       | -1                 | InjPosition |                      | SampleType      | Sample       | IRM Calibration Status | Success              |
| Data Filename | 05.25.12 EY-2-61.d | ACQ Method  | Water-ACN Infusion M | Comment         |              | Acquired Time          | 5/25/2012 1:59:22 PM |

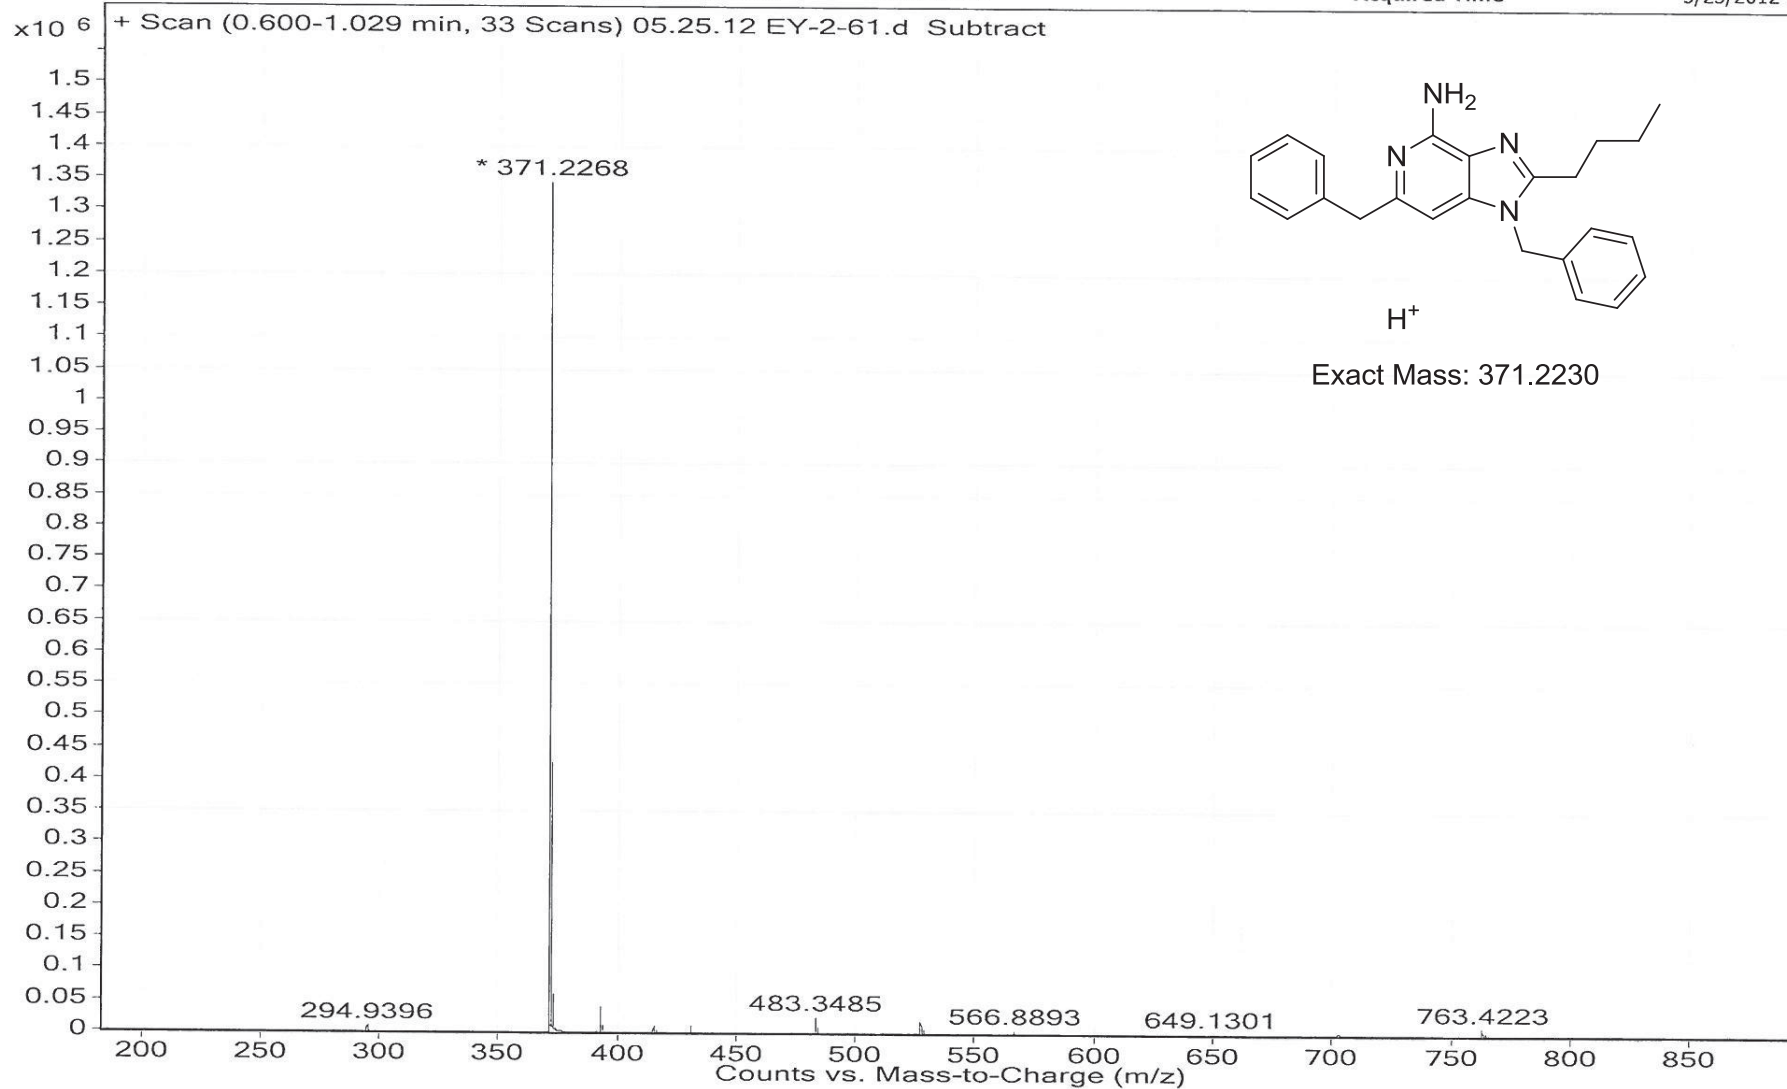

## 23g LC-MS

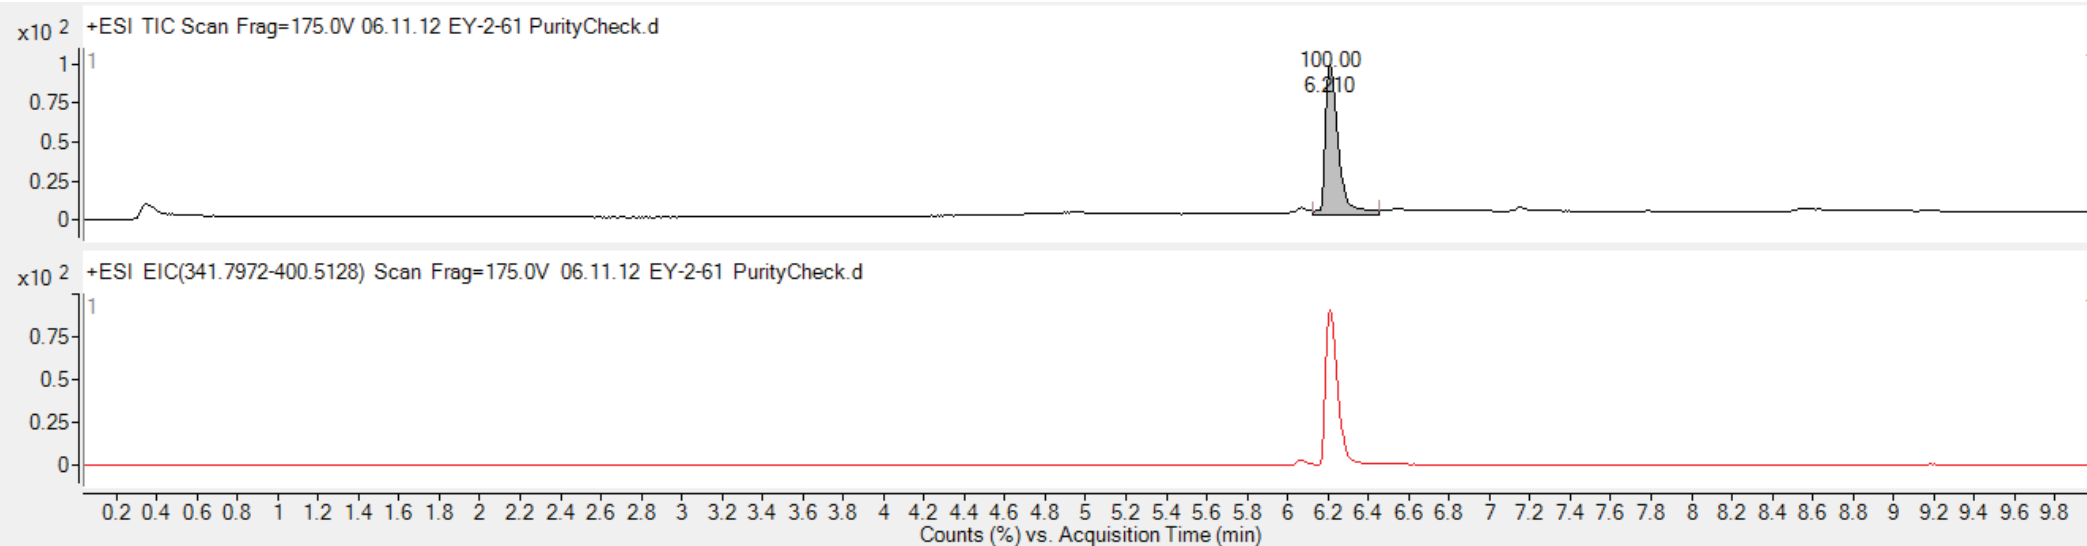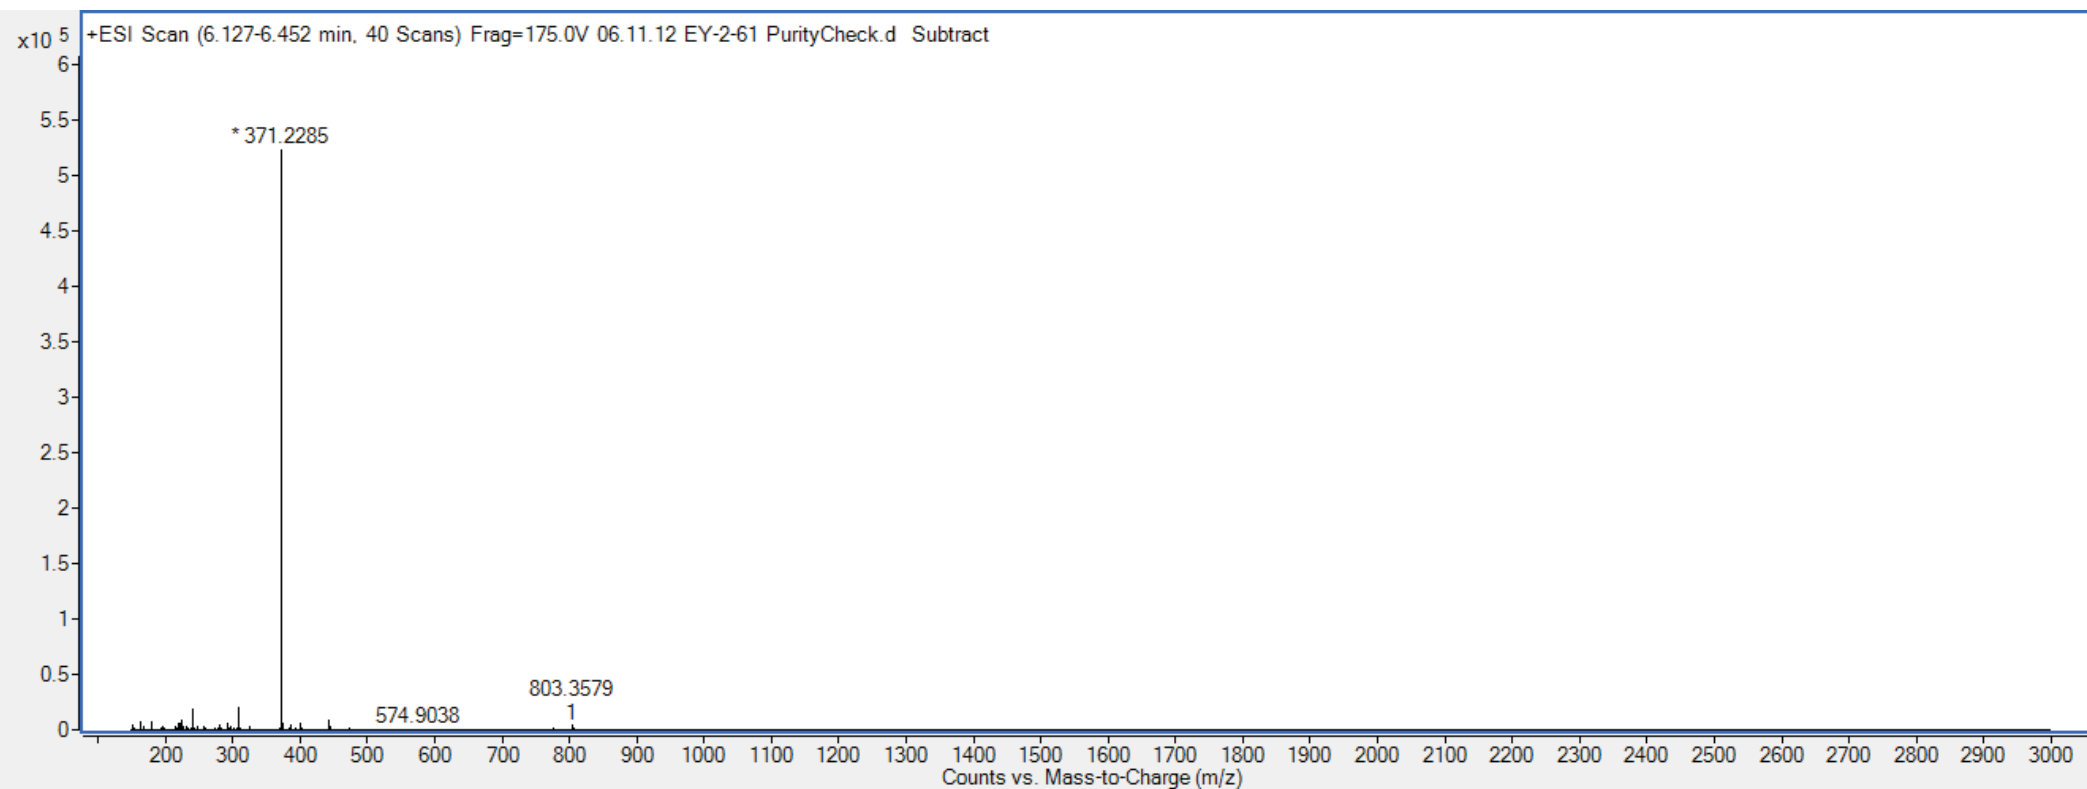



# 20h <sup>1</sup>H NMR

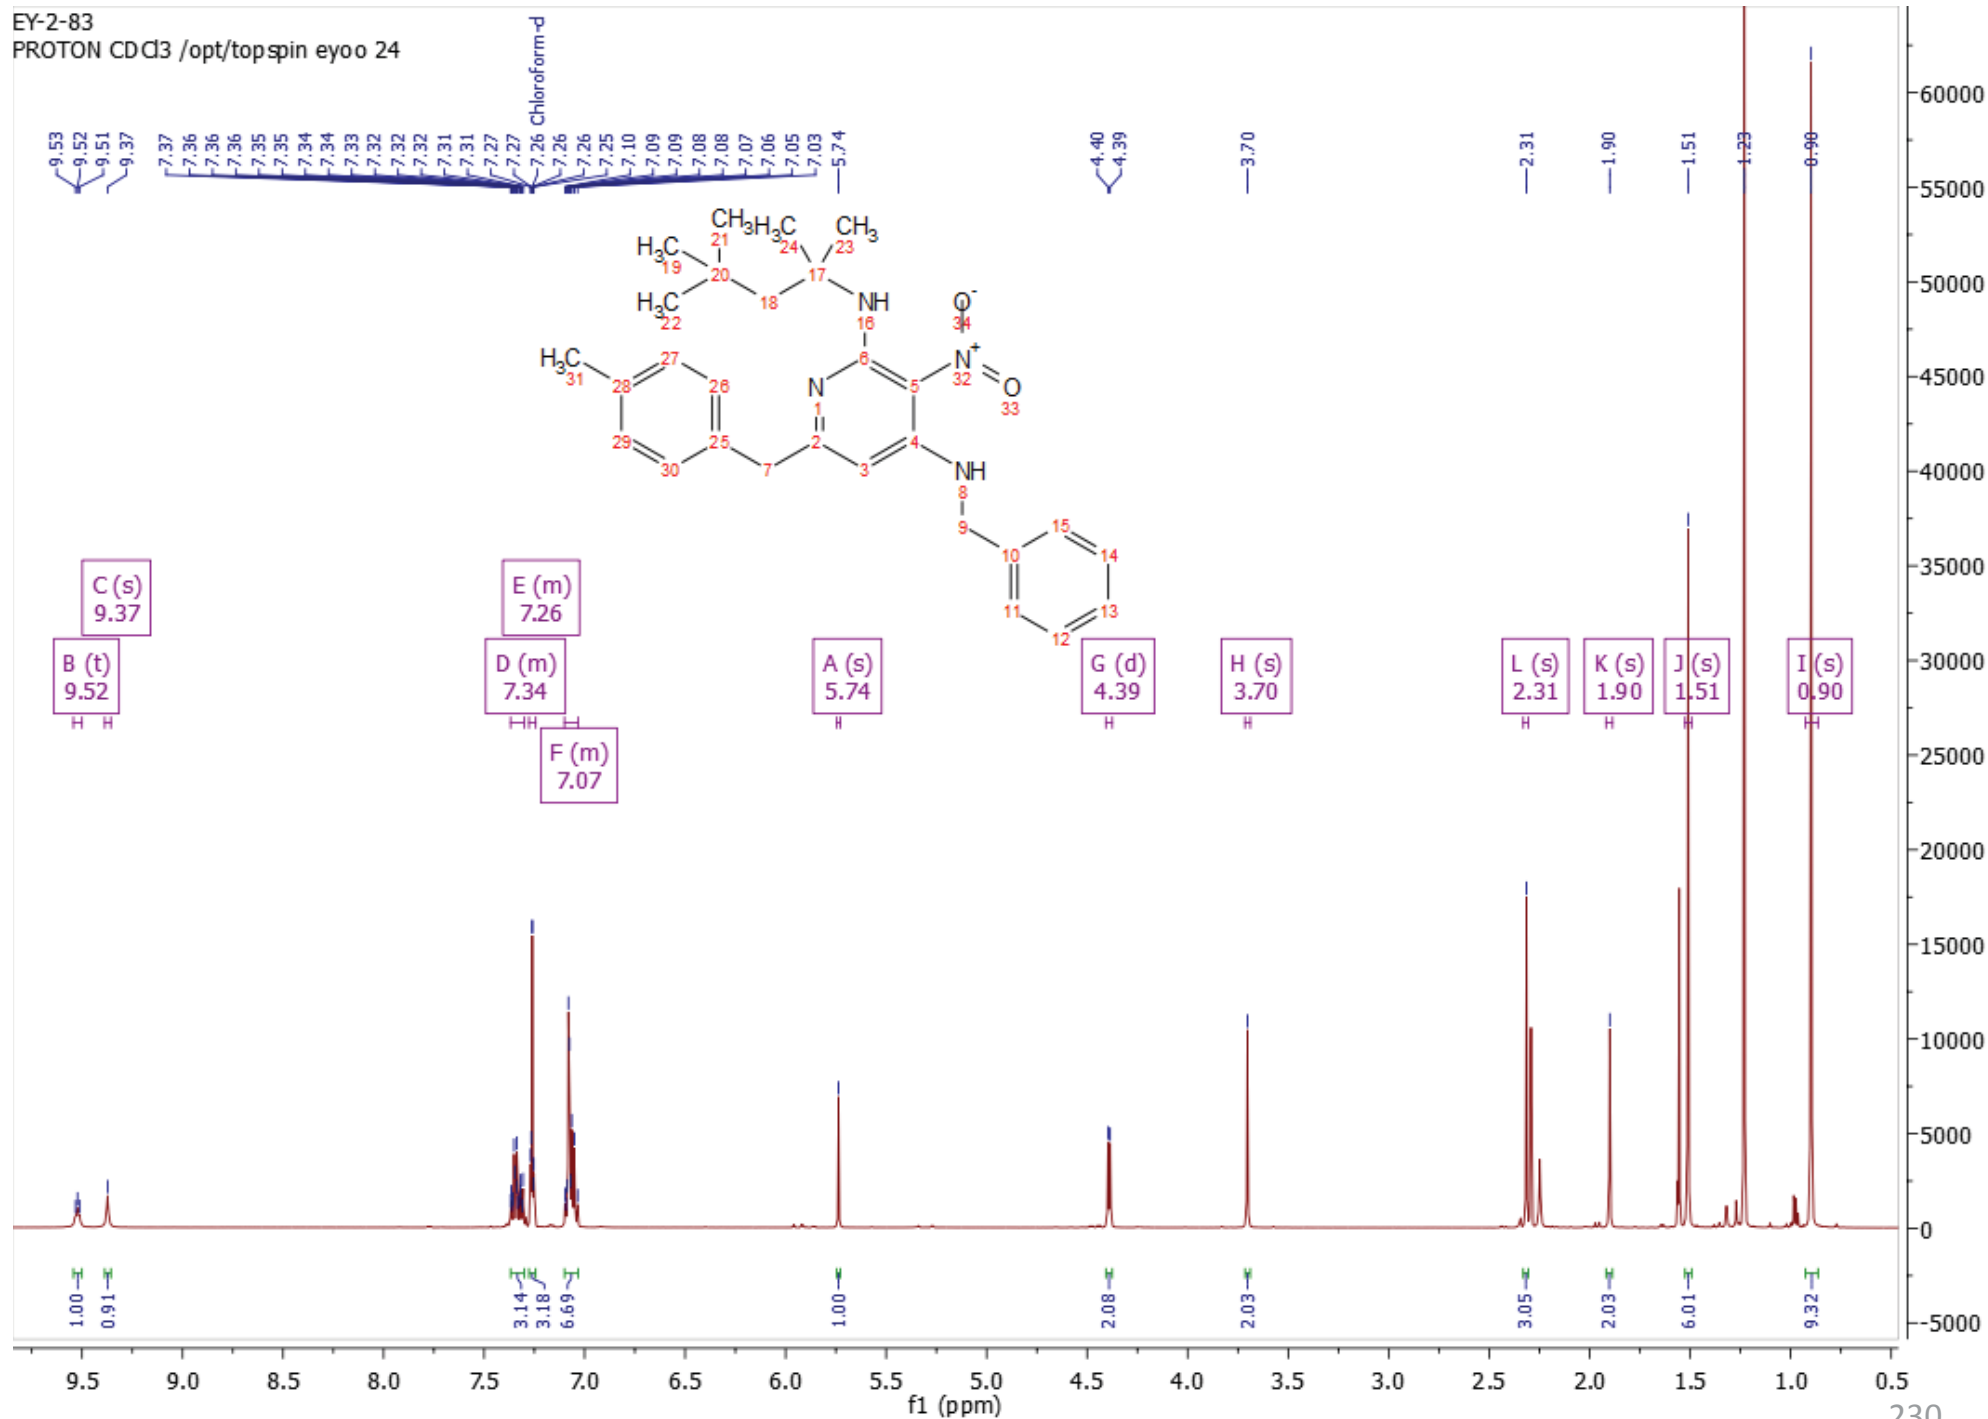

# 20h <sup>13</sup>C NMR

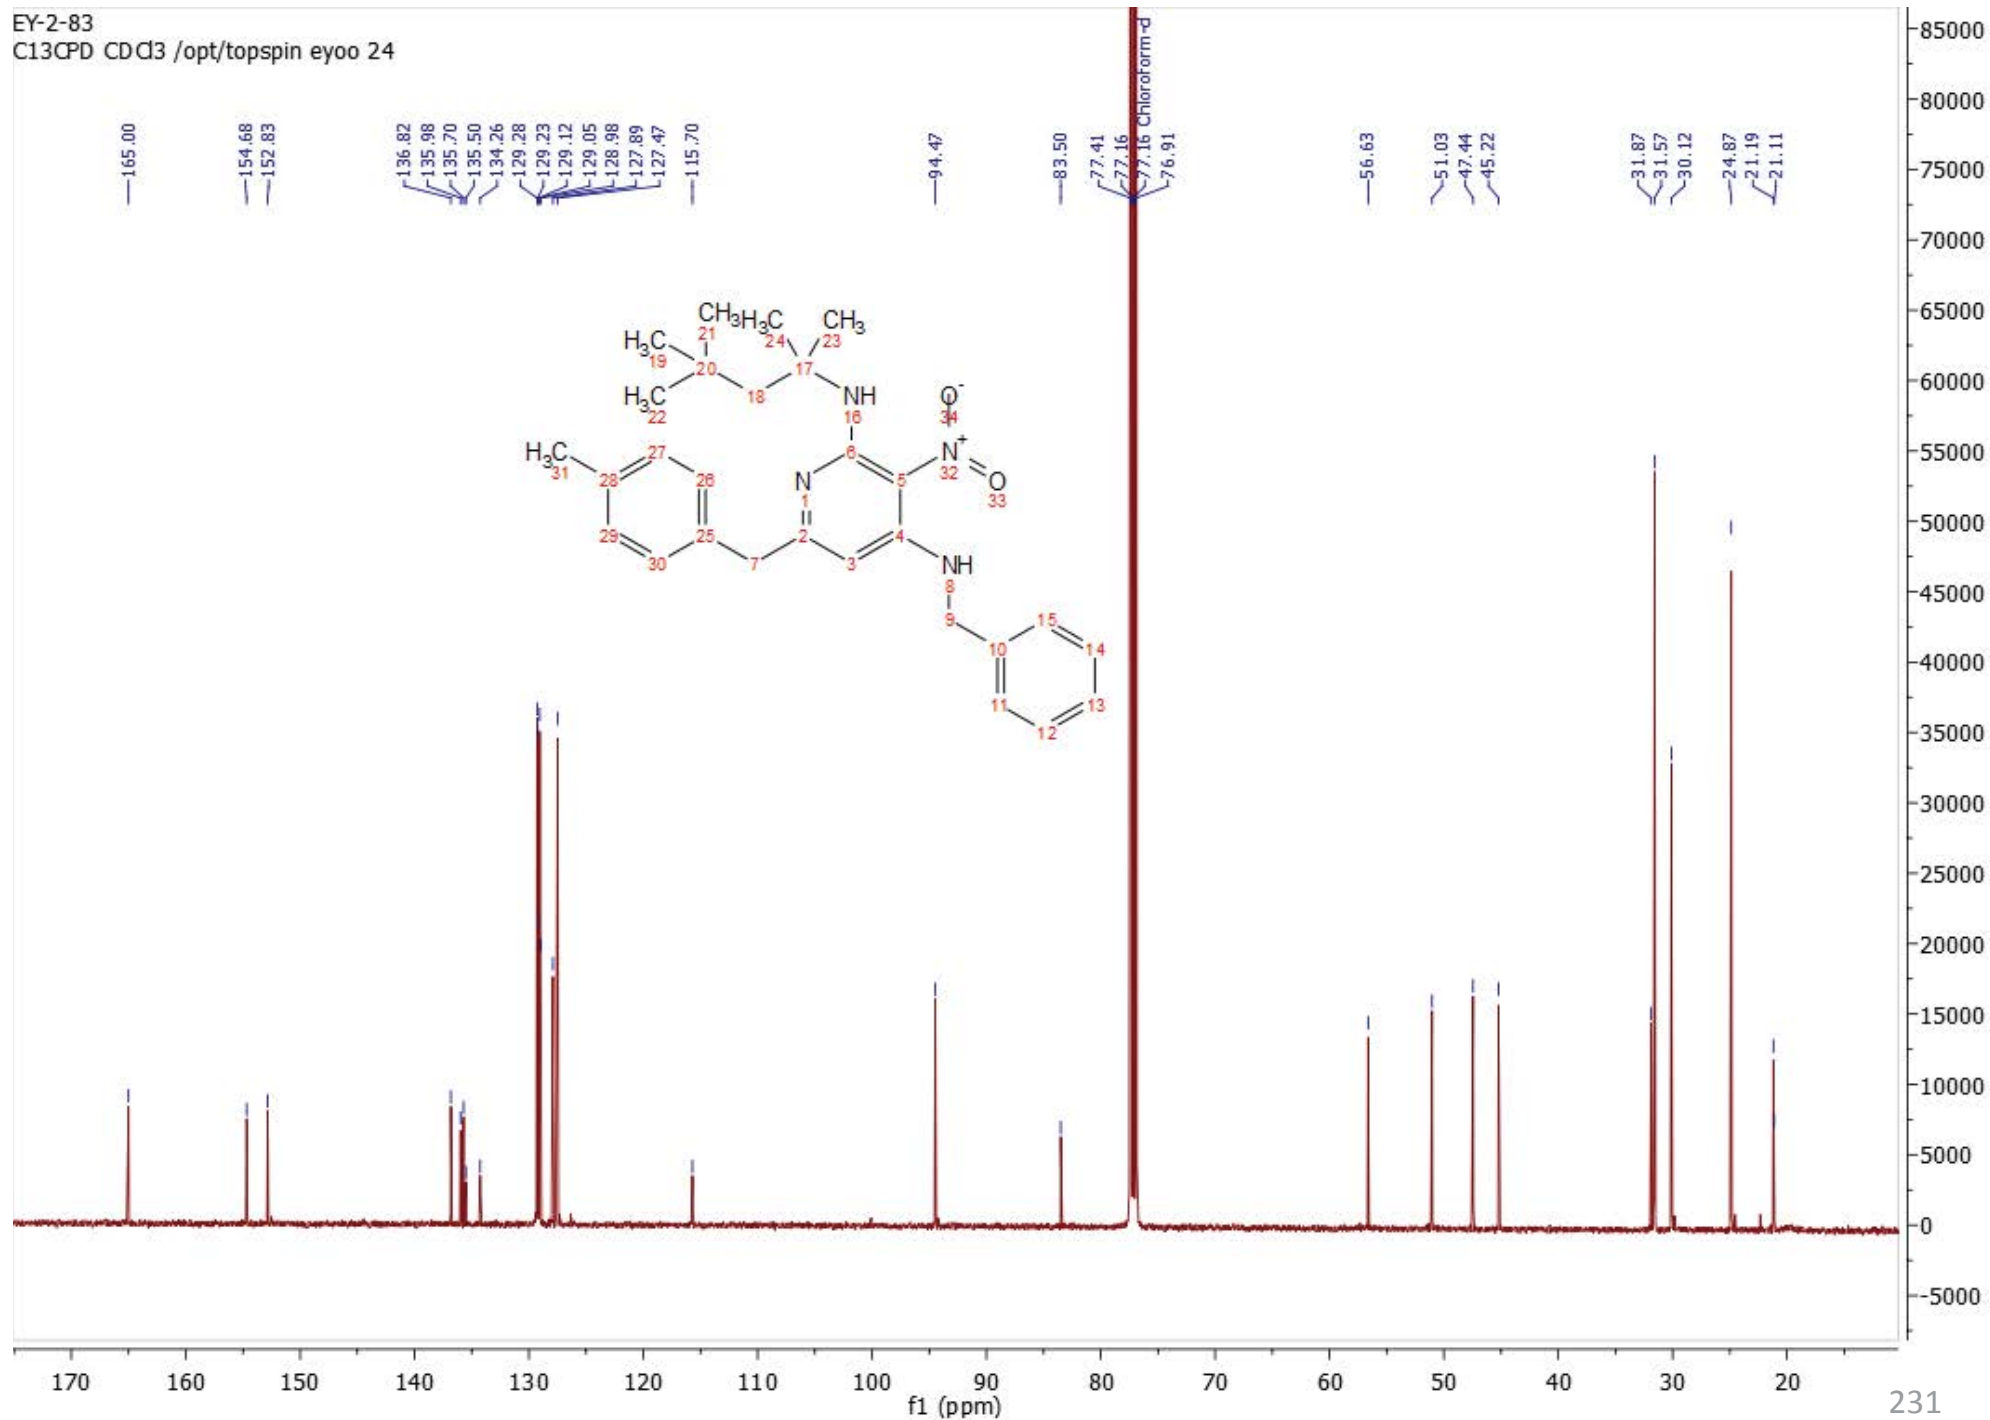

20h MS

|               |                      |             |                      |                 |              |                        |                      |
|---------------|----------------------|-------------|----------------------|-----------------|--------------|------------------------|----------------------|
| Sample Name   | 06.09.12 EY-2-83 tub | Position    | Vial 1               | Instrument Name | Instrument 1 | User Name              |                      |
| Inj Vol       | -1                   | InjPosition |                      | SampleType      | Sample       | IRM Calibration Status | Success              |
| Data Filename | 06.09.12 EY-2-83 tub | ACQ Method  | Water-ACN Infusion M | Comment         |              | Acquired Time          | 6/9/2012 10:30:28 AM |

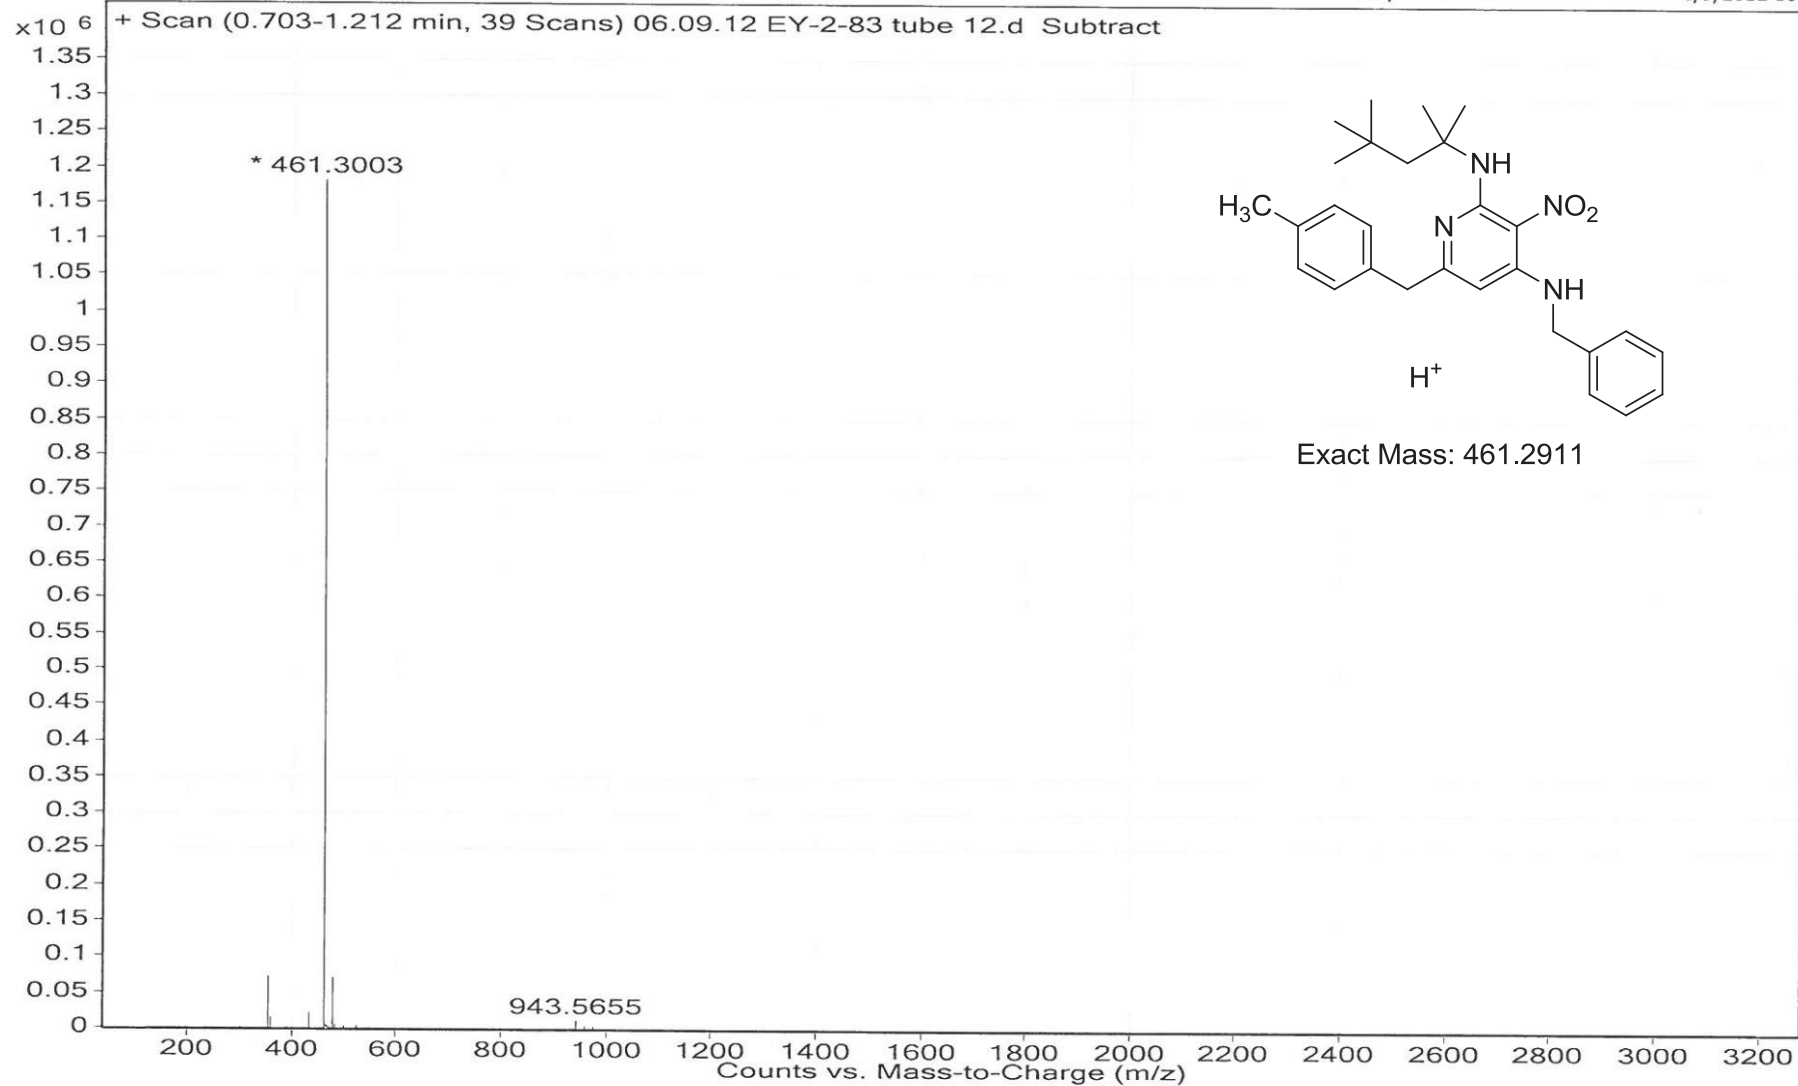

# 21h MS

| Sample Name   | 06.09.12 EY-2-84   | Position    | Vial 1               | Instrument Name | Instrument 1 | User Name              |                     |
|---------------|--------------------|-------------|----------------------|-----------------|--------------|------------------------|---------------------|
| Inj Vol       | -1                 | InjPosition |                      | SampleType      | Sample       | IRM Calibration Status | Success             |
| Data Filename | 06.09.12 EY-2-84.d | ACQ Method  | Water-ACN Infusion M | Comment         |              | Acquired Time          | 6/9/2012 1:02:08 PM |

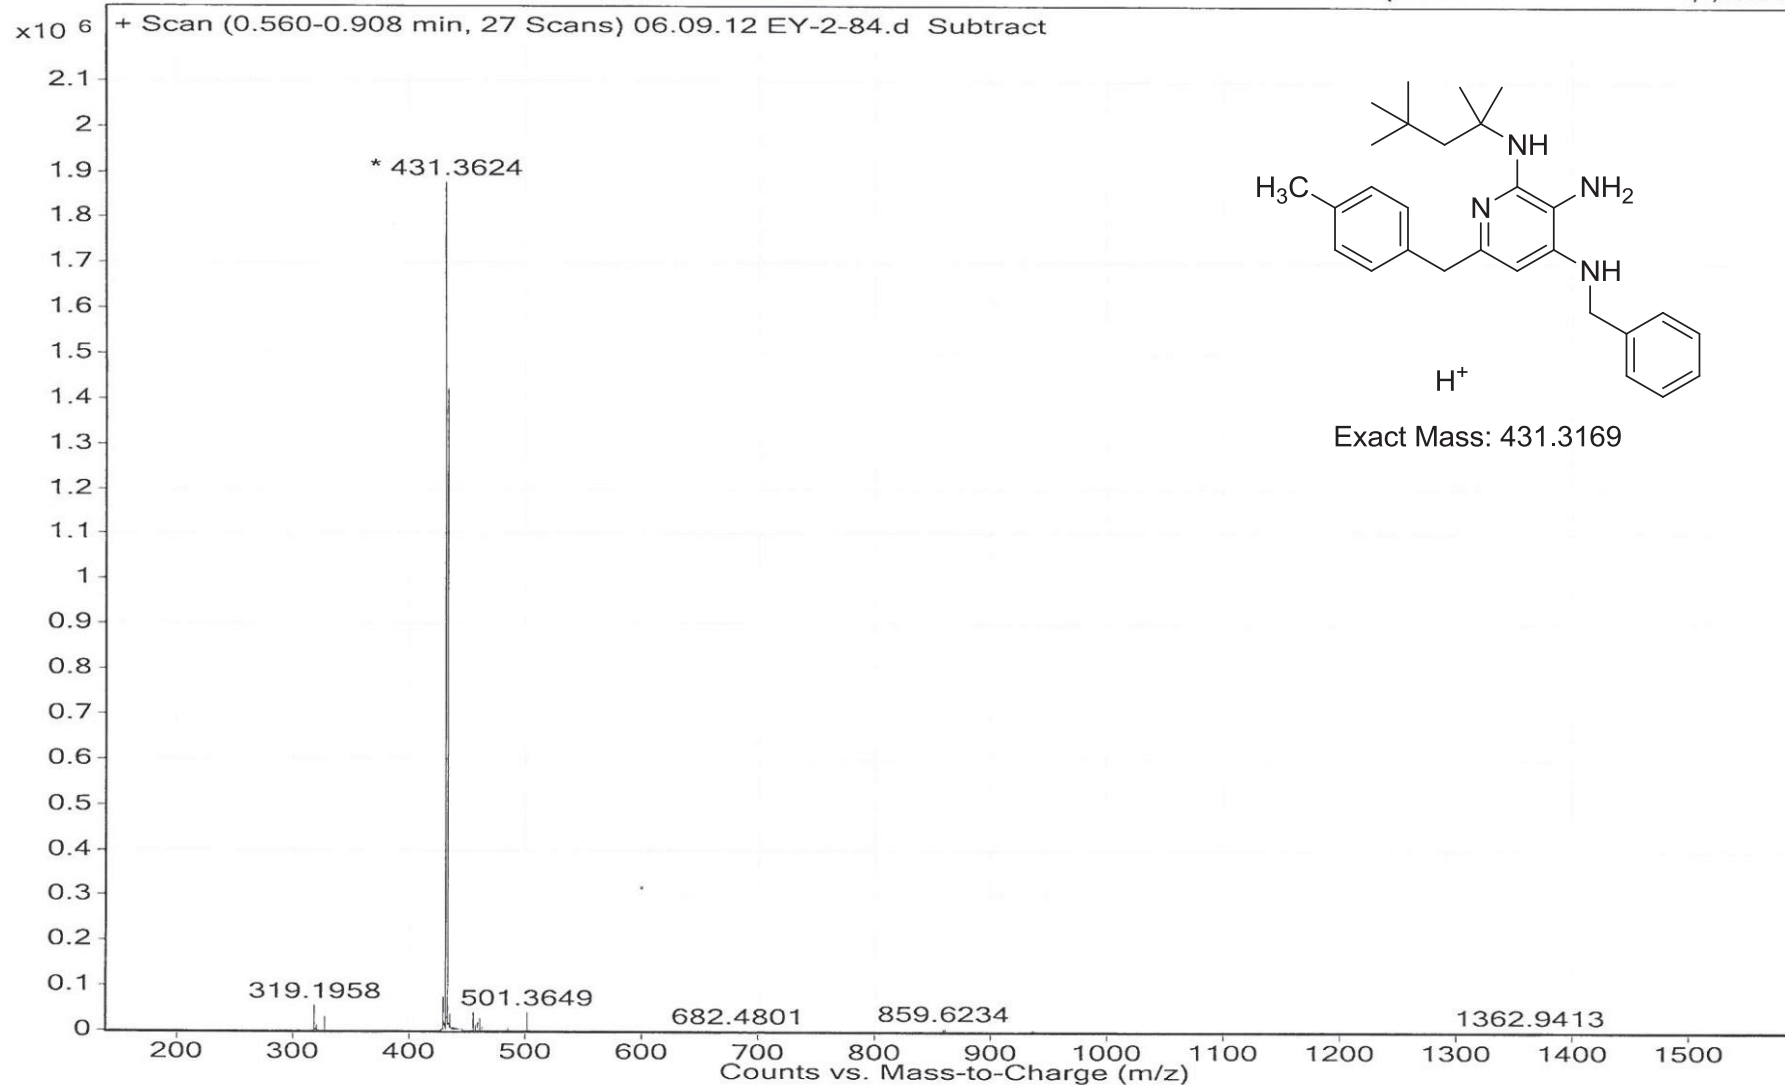

22h MS

|               |                    |             |                      |                 |              |                        |                      |
|---------------|--------------------|-------------|----------------------|-----------------|--------------|------------------------|----------------------|
| Sample Name   | 06.11.12 EY-2-85   | Position    | Vial 2               | Instrument Name | Instrument 1 | User Name              |                      |
| Inj Vol       | -1                 | InjPosition |                      | SampleType      | Sample       | IRM Calibration Status | Success              |
| Data Filename | 06.11.12 EY-2-85.d | ACQ Method  | Water-ACN Infusion M | Comment         |              | Acquired Time          | 6/11/2012 9:31:28 AM |

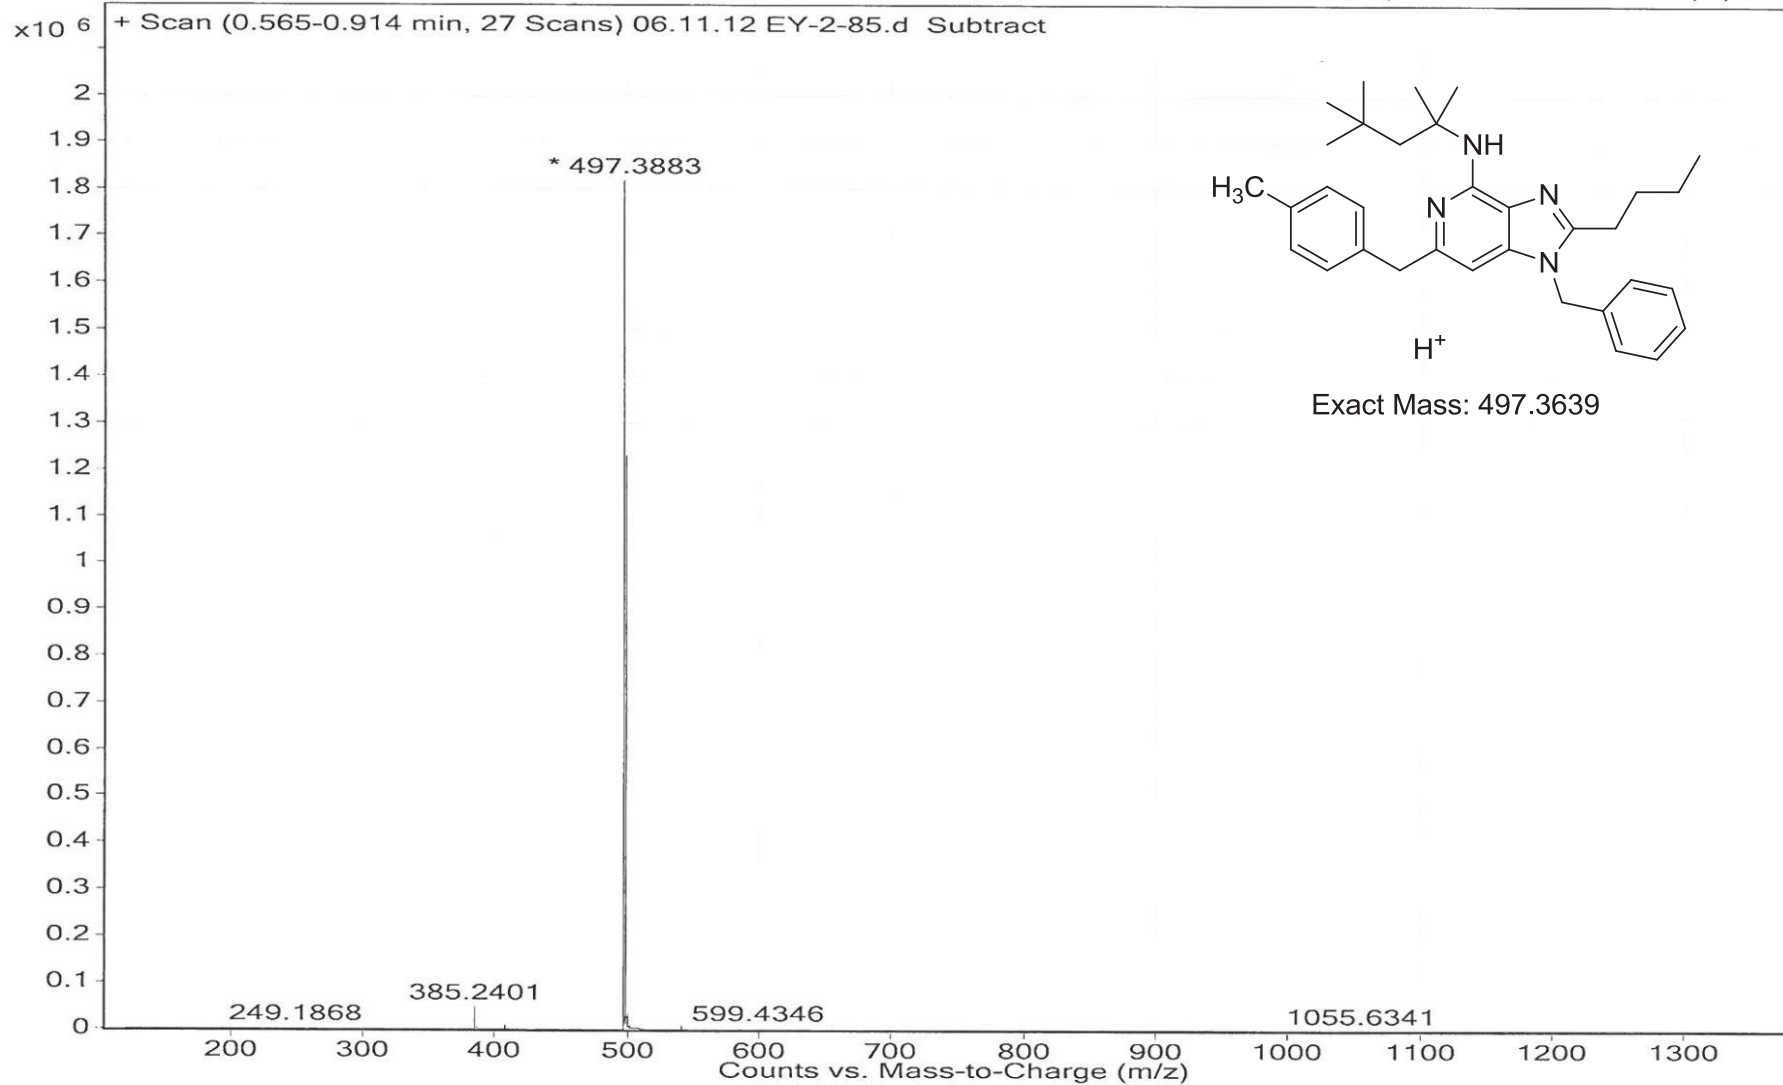

# 23h <sup>1</sup>H NMR

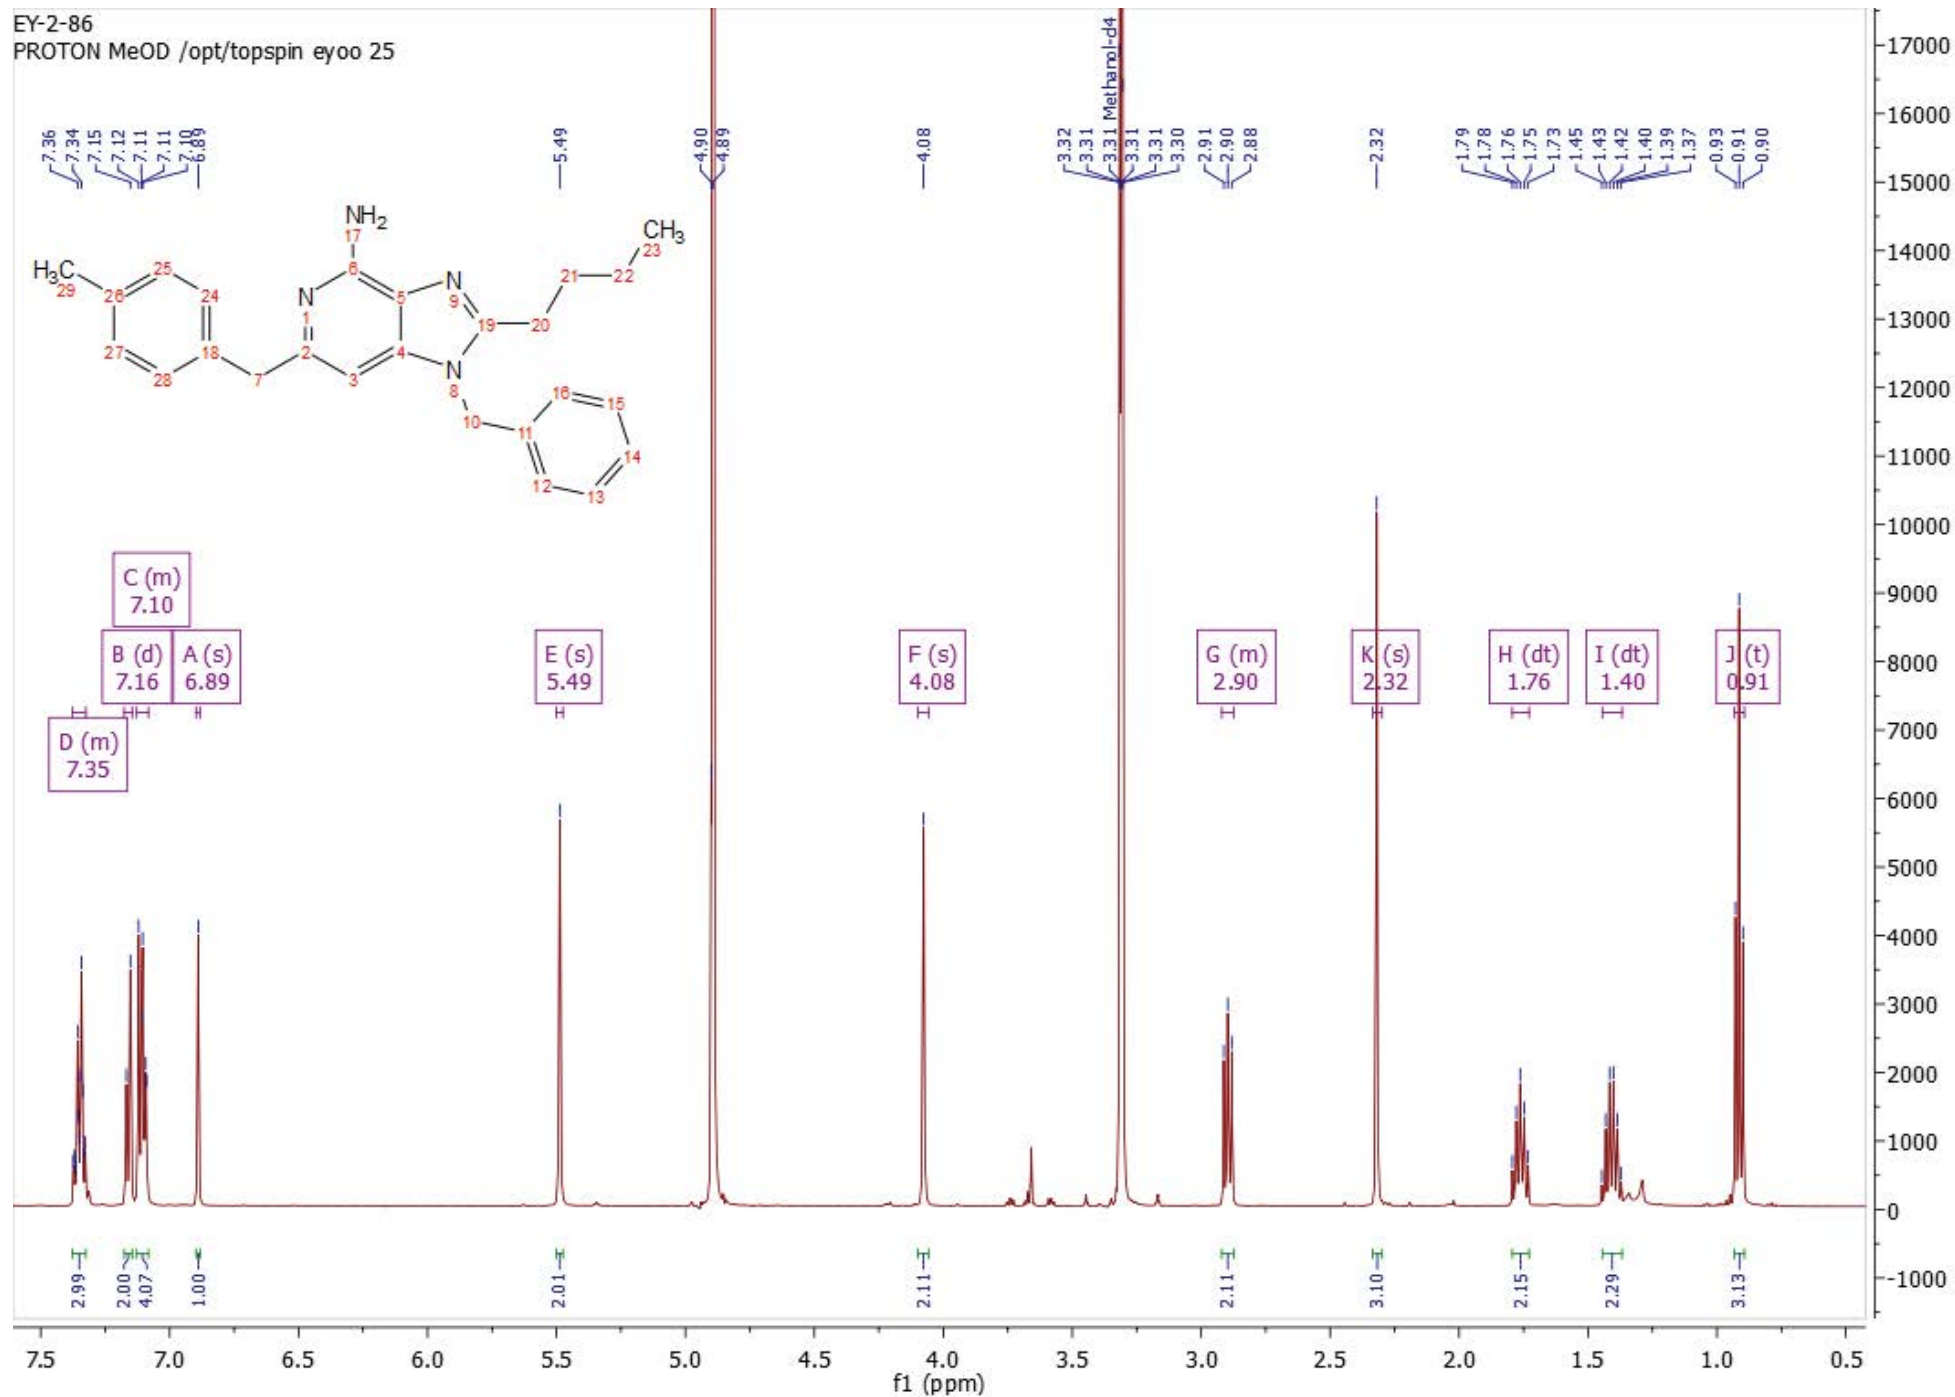

# <sup>23</sup>h <sup>13</sup>C NMR

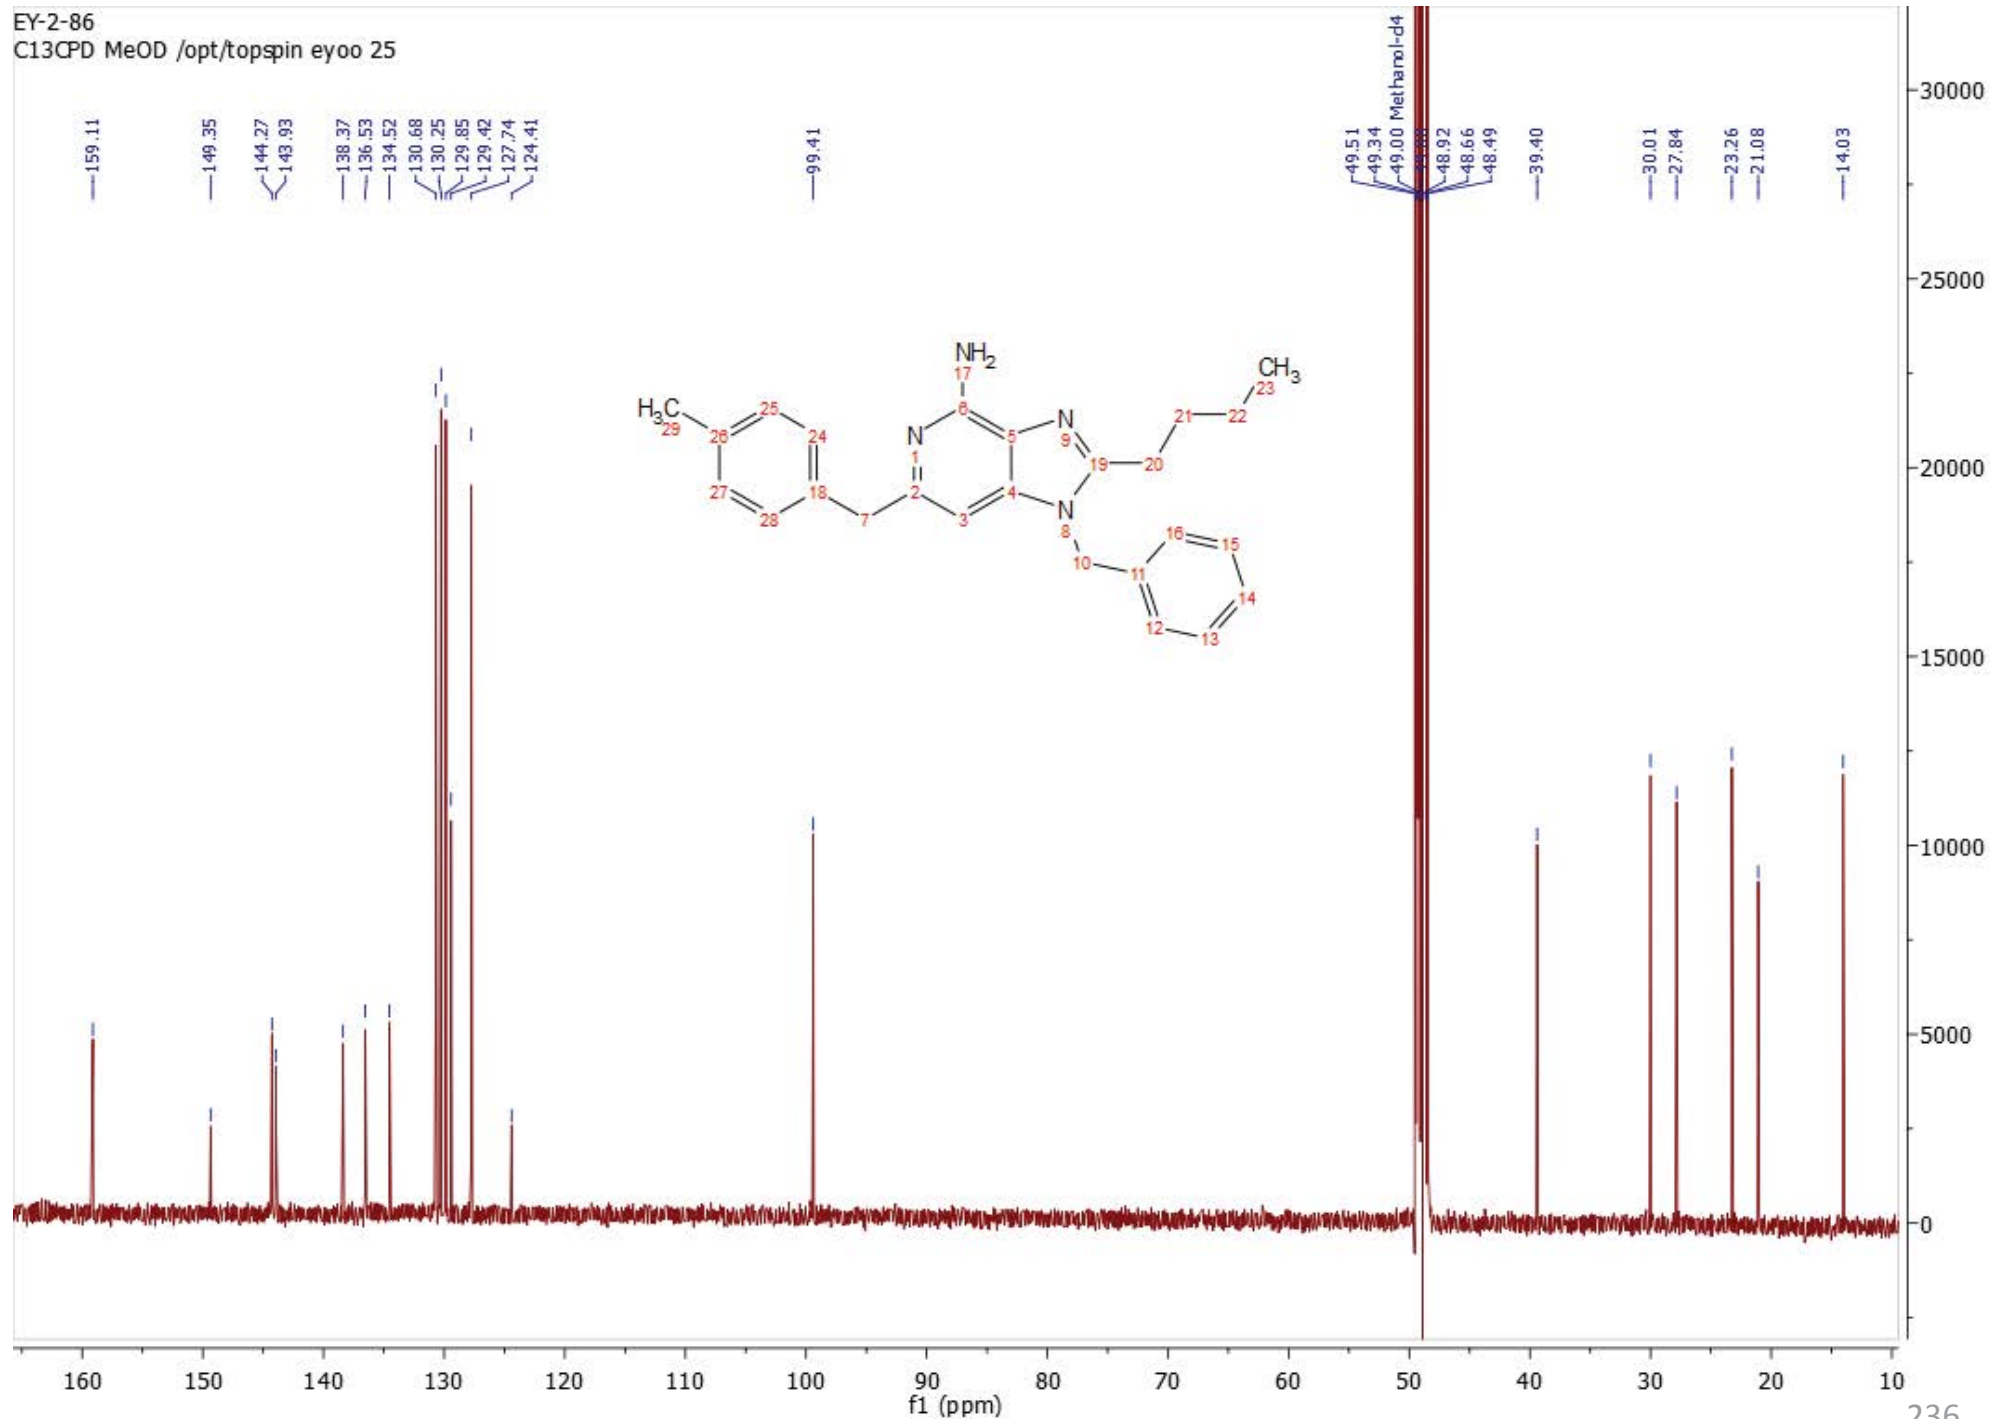



23h MS

| Sample Name   | 06.11.12 EY-2-86   | Position    | Vial 1               | Instrument Name | Instrument 1 | User Name              |                      |
|---------------|--------------------|-------------|----------------------|-----------------|--------------|------------------------|----------------------|
| Inj Vol       | -1                 | InjPosition |                      | SampleType      | Sample       | IRM Calibration Status | Success              |
| Data Filename | 06.11.12 EY-2-86.d | ACQ Method  | Water-ACN Infusion M | Comment         |              | Acquired Time          | 6/11/2012 9:27:21 AM |

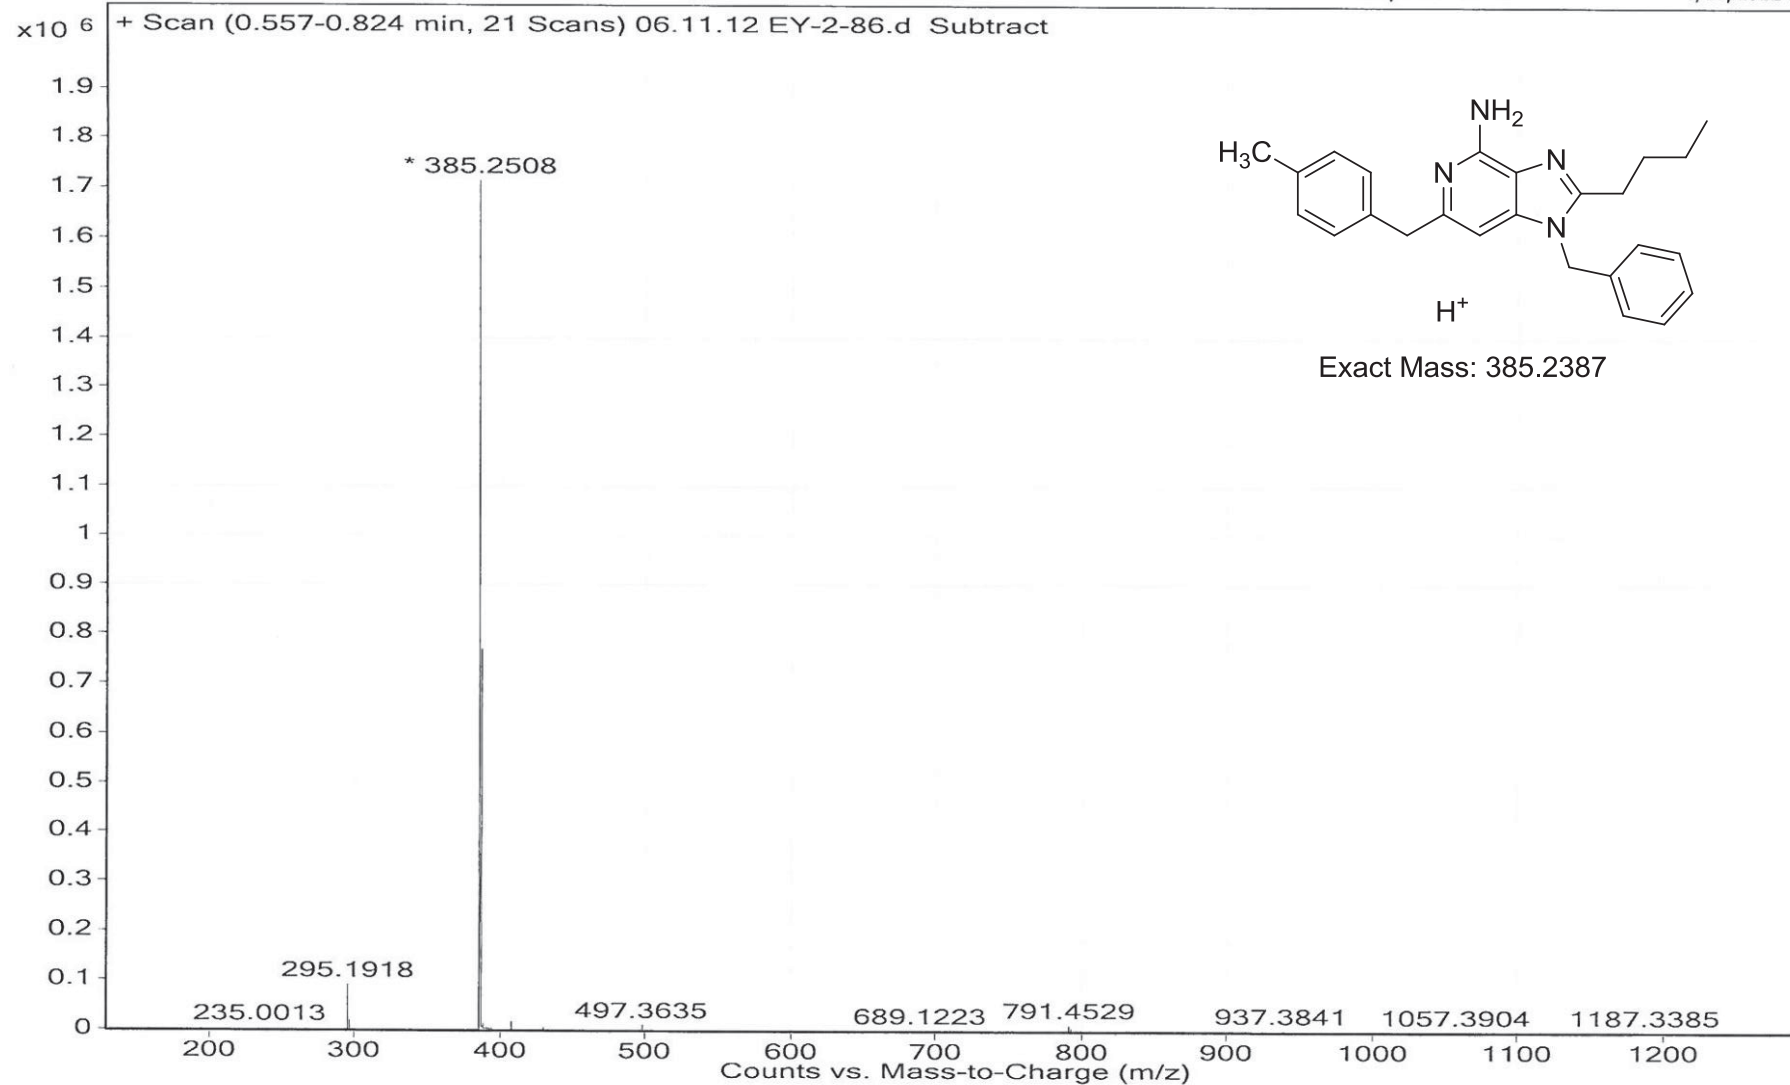

## 23h LC-MS

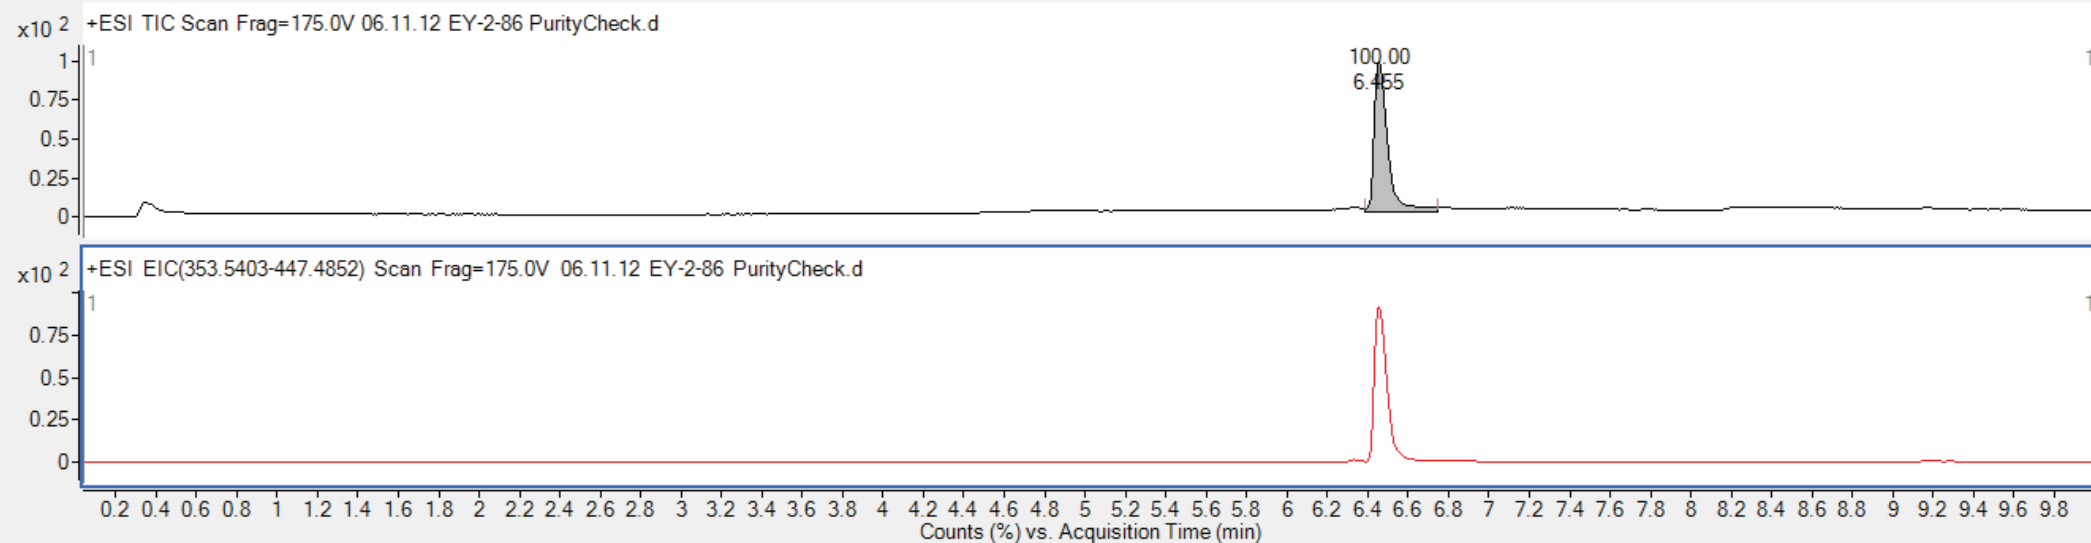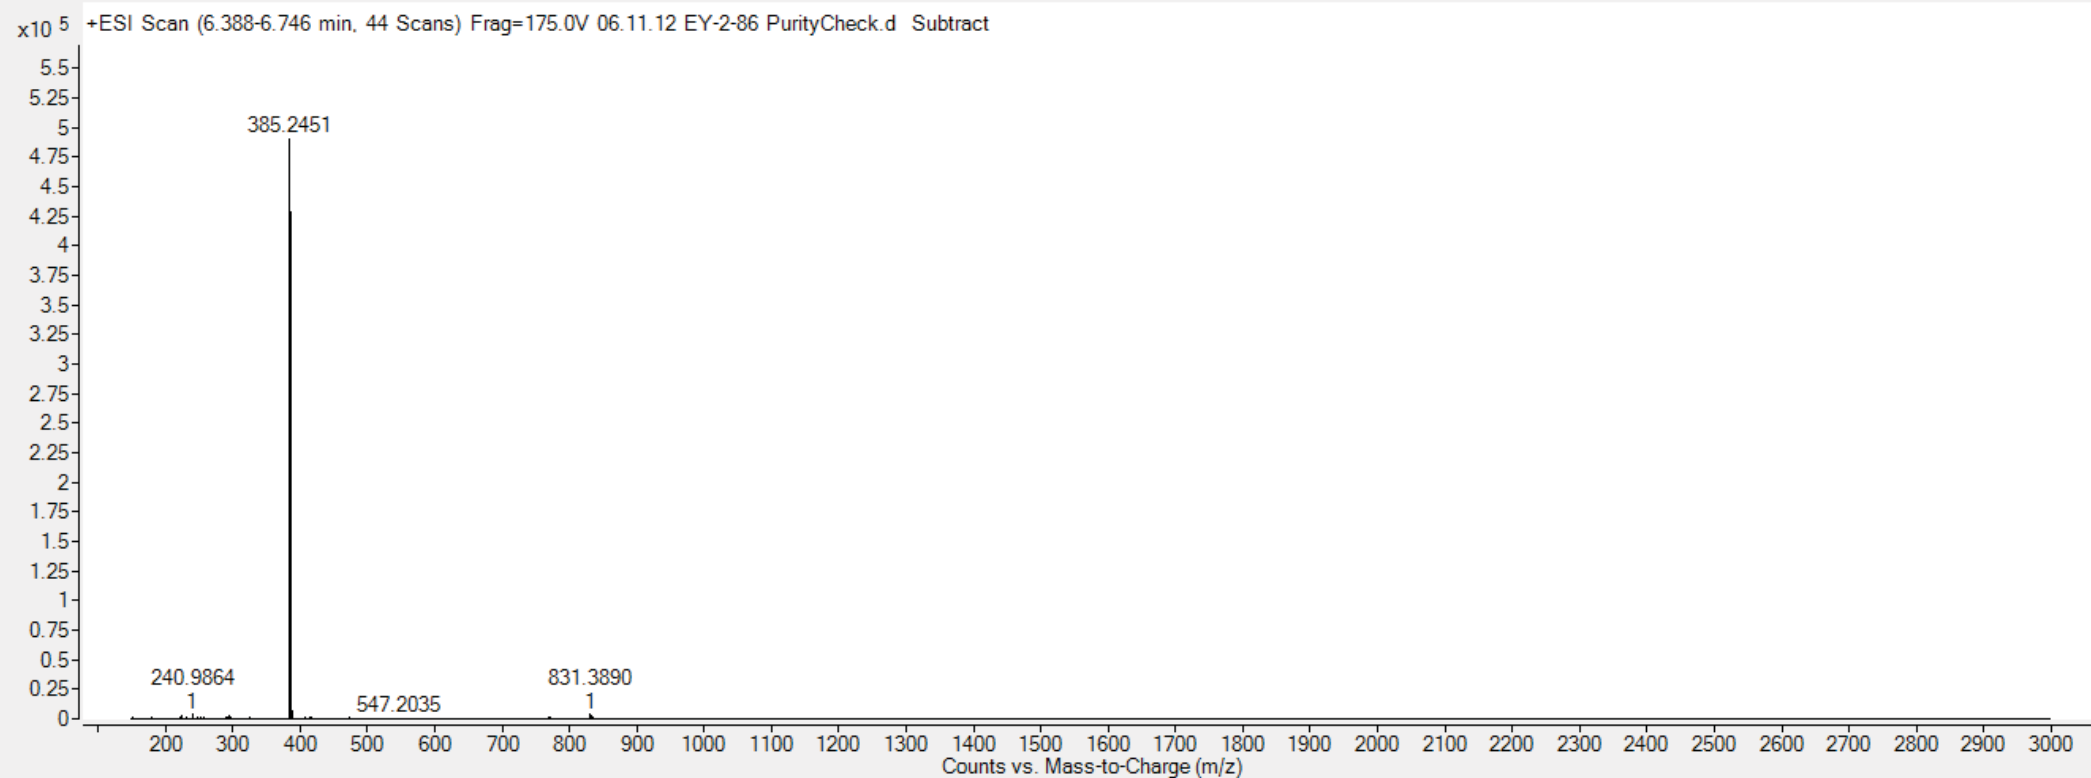

# <sup>201</sup>H NMR

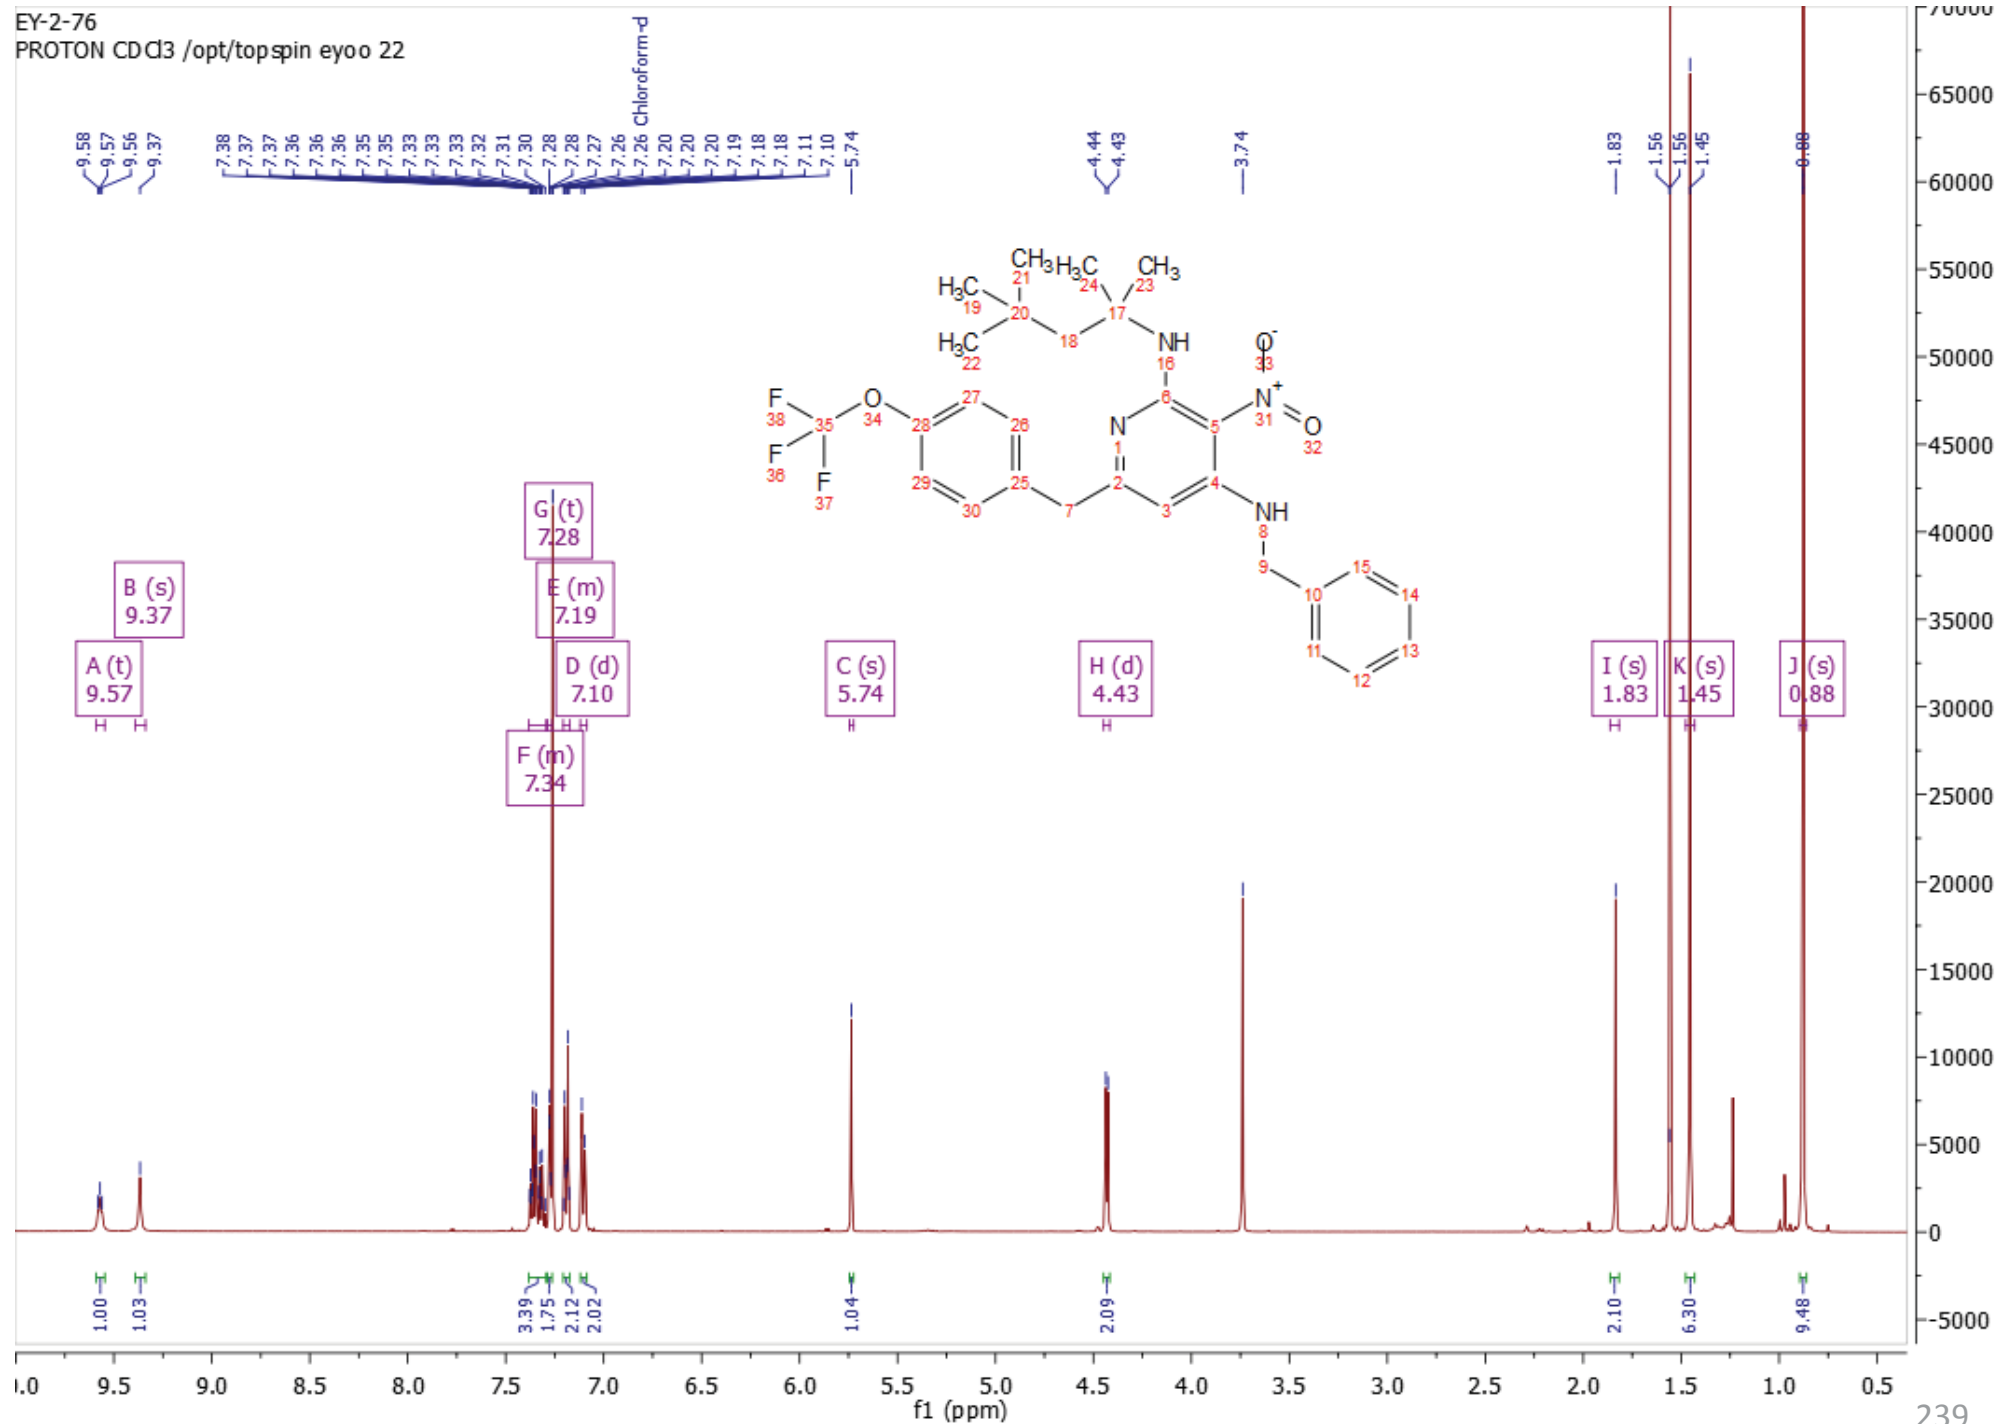

# <sup>20</sup>F <sup>13</sup>C NMR

EY-2-76

C13CPD CDCl<sub>3</sub> /opt/topspin eyoo 22

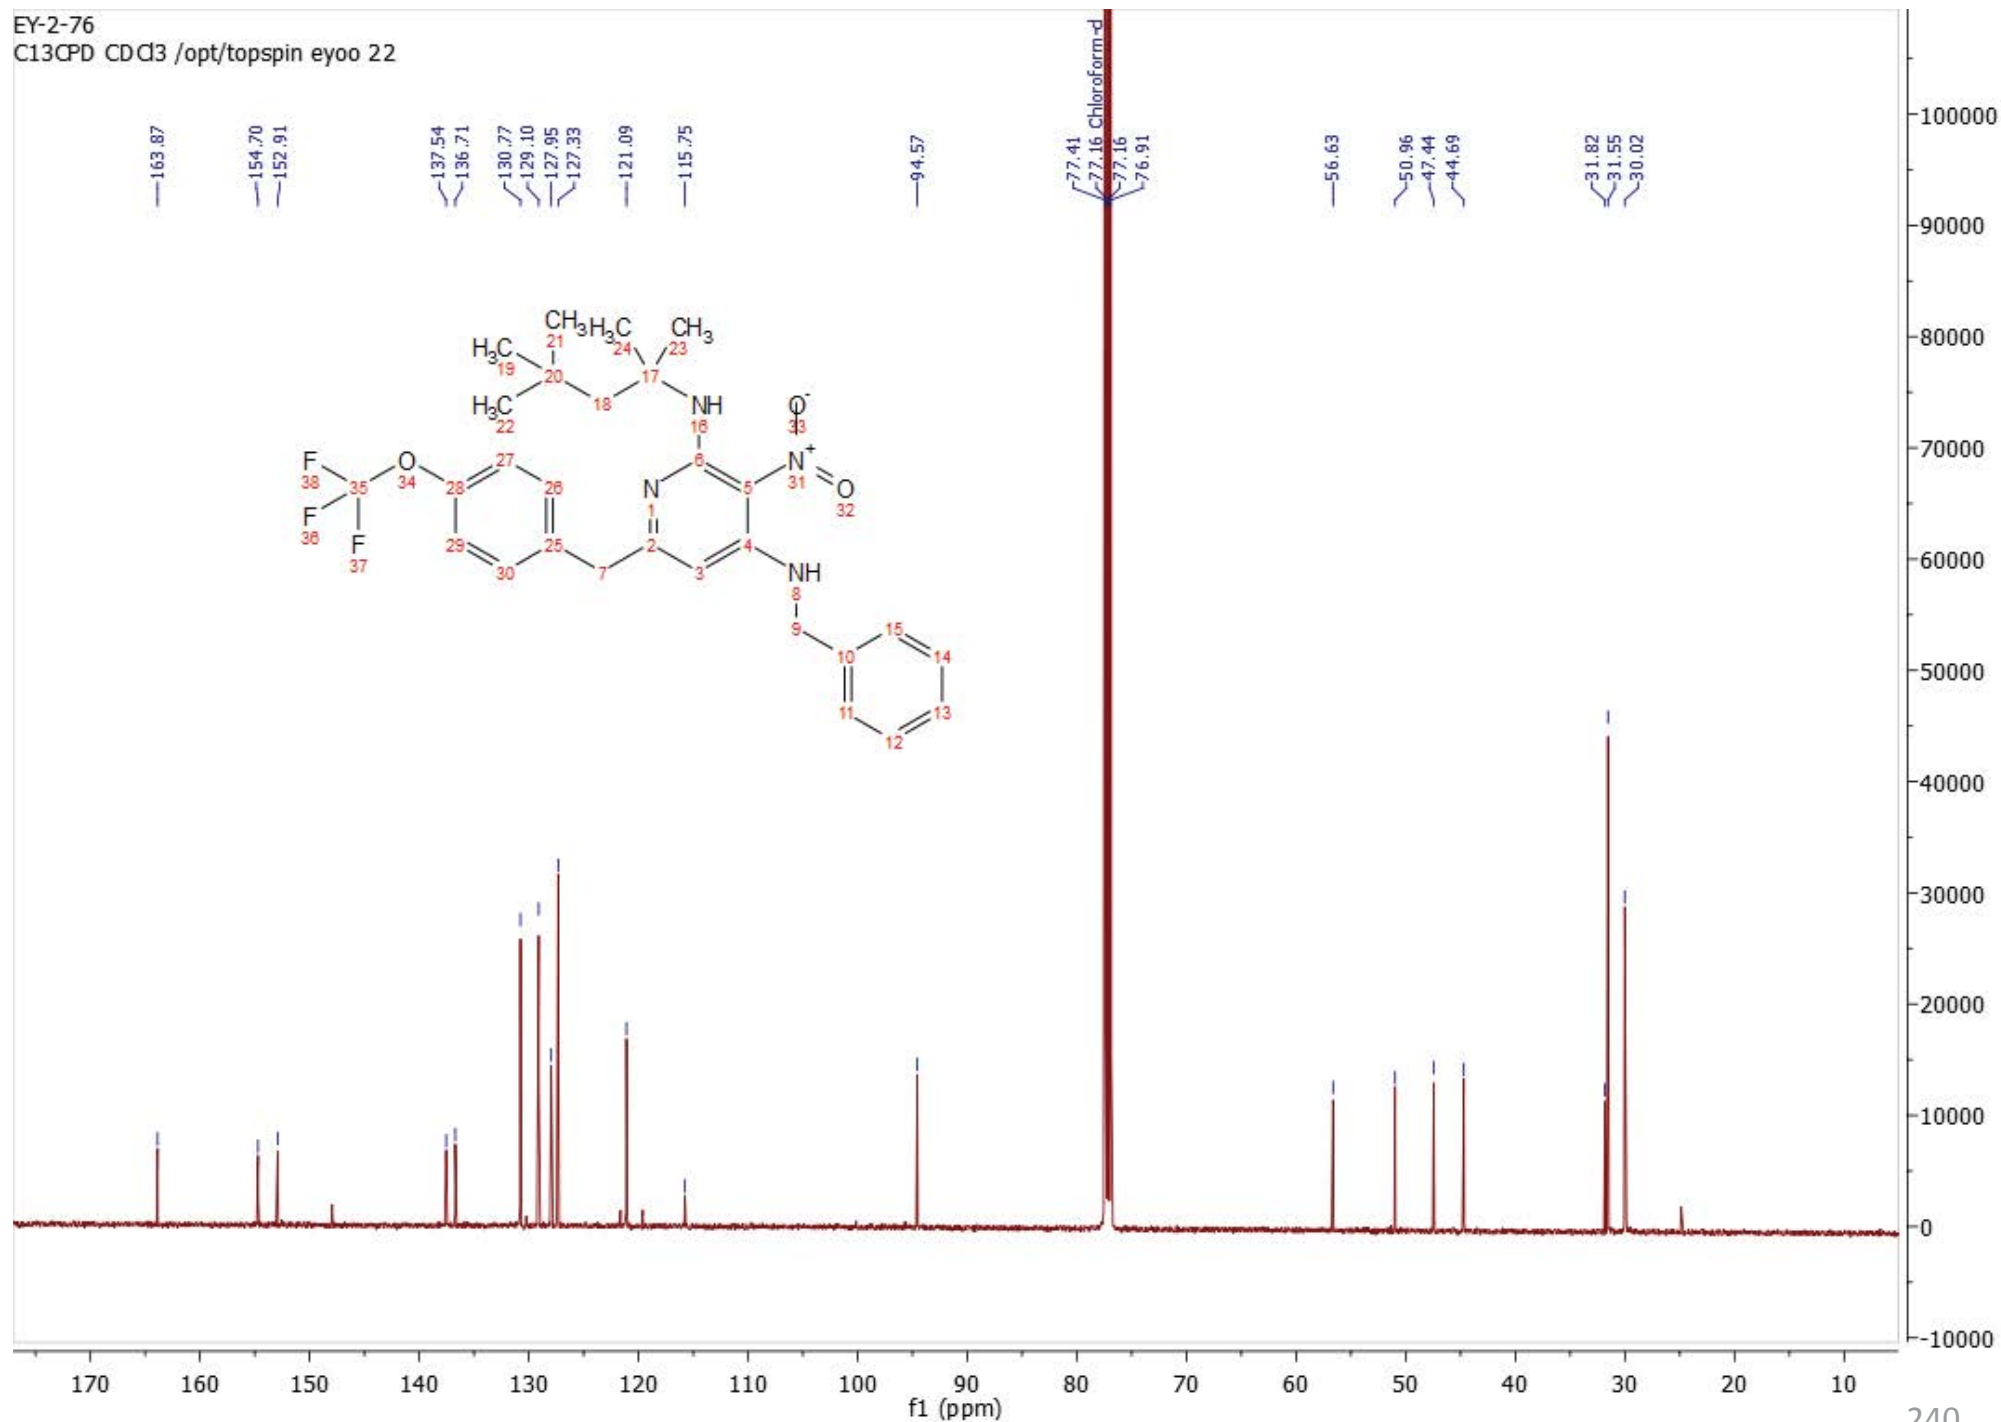

# 201 MS

| Sample Name   | 06.06.12 EY-2-76 tub | Position    | Vial 2               | Instrument Name | Instrument 1 | User Name              |                      |
|---------------|----------------------|-------------|----------------------|-----------------|--------------|------------------------|----------------------|
| Inj Vol       | -1                   | InjPosition |                      | SampleType      | Sample       | IRM Calibration Status | Success              |
| Data Filename | 06.06.12 EY-2-76 tub | ACQ Method  | Water-ACN Infusion M | Comment         |              | Acquired Time          | 6/6/2012 11:10:31 AM |

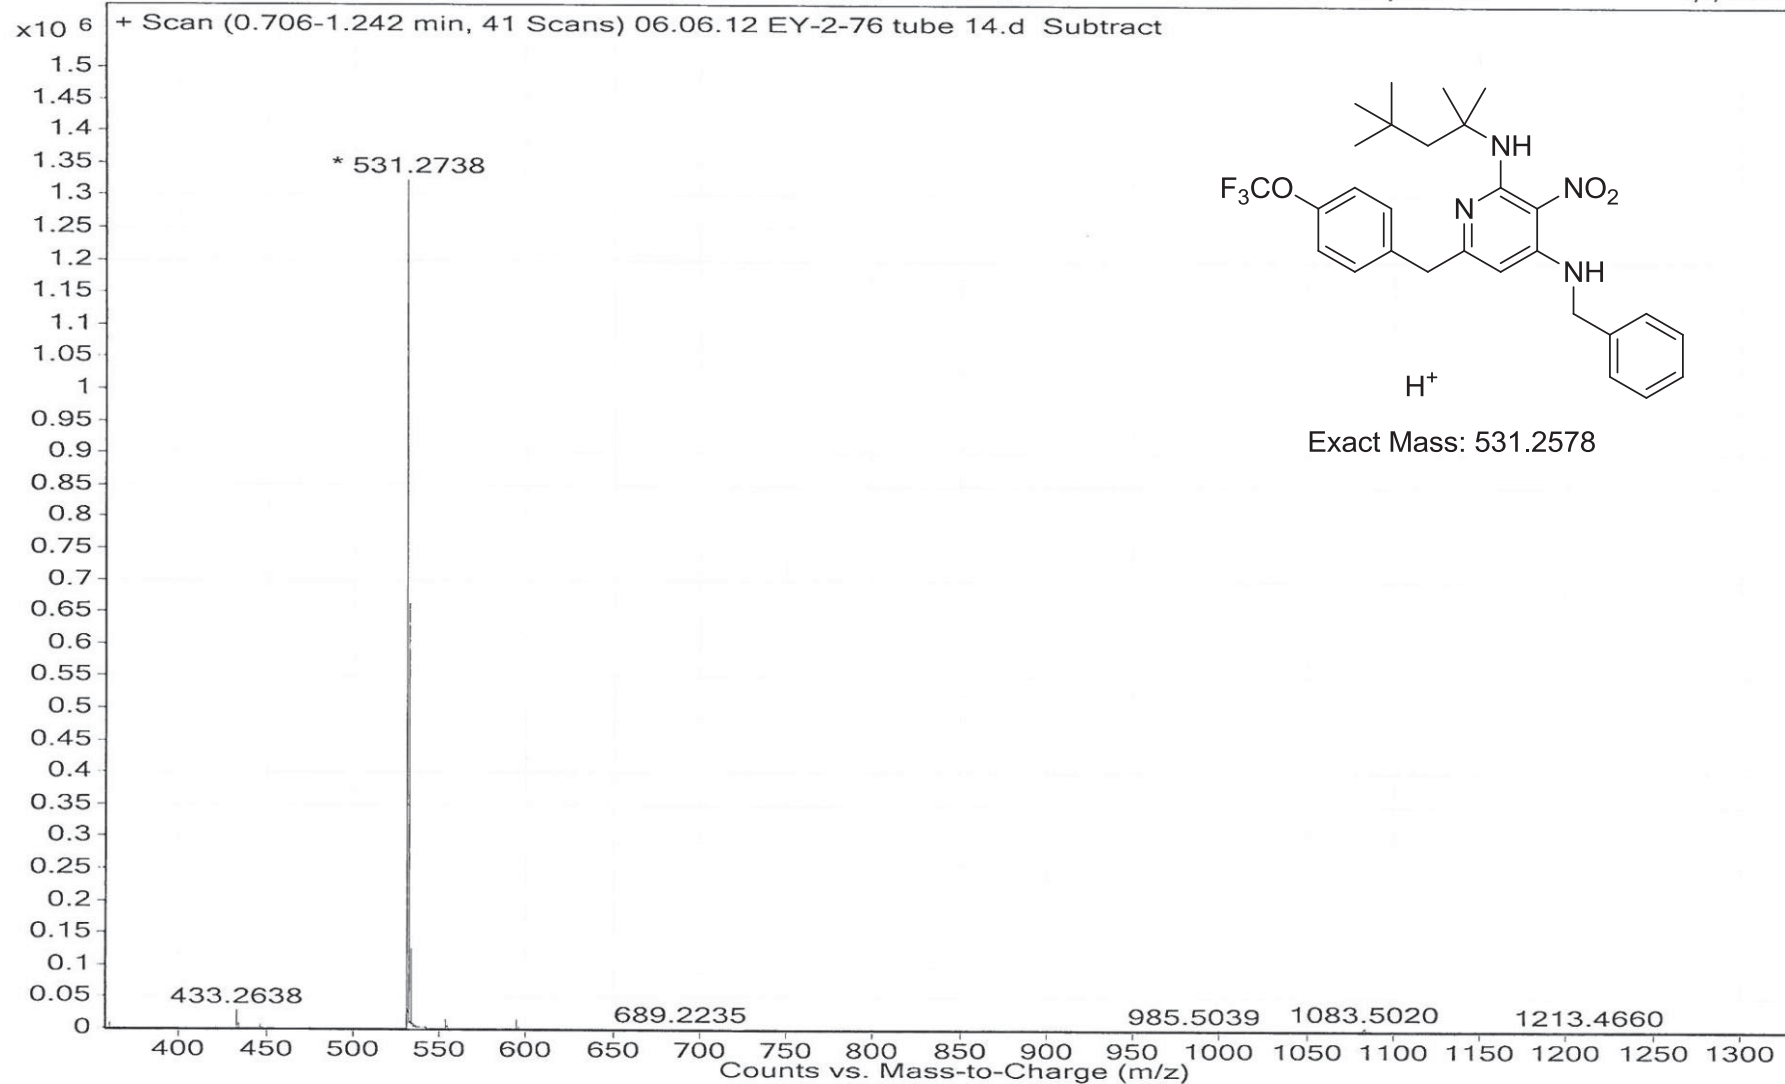

# 211 MS

|               |                    |             |                      |                 |              |                        |                     |
|---------------|--------------------|-------------|----------------------|-----------------|--------------|------------------------|---------------------|
| Sample Name   | 06.06.12 EY-2-79   | Position    | Vial 1               | Instrument Name | Instrument 1 | User Name              |                     |
| Inj Vol       | -1                 | InjPosition |                      | SampleType      | Sample       | IRM Calibration Status | Success             |
| Data Filename | 06.06.12 EY-2-79.d | ACQ Method  | Water-ACN Infusion M | Comment         |              | Acquired Time          | 6/6/2012 5:10:26 PM |

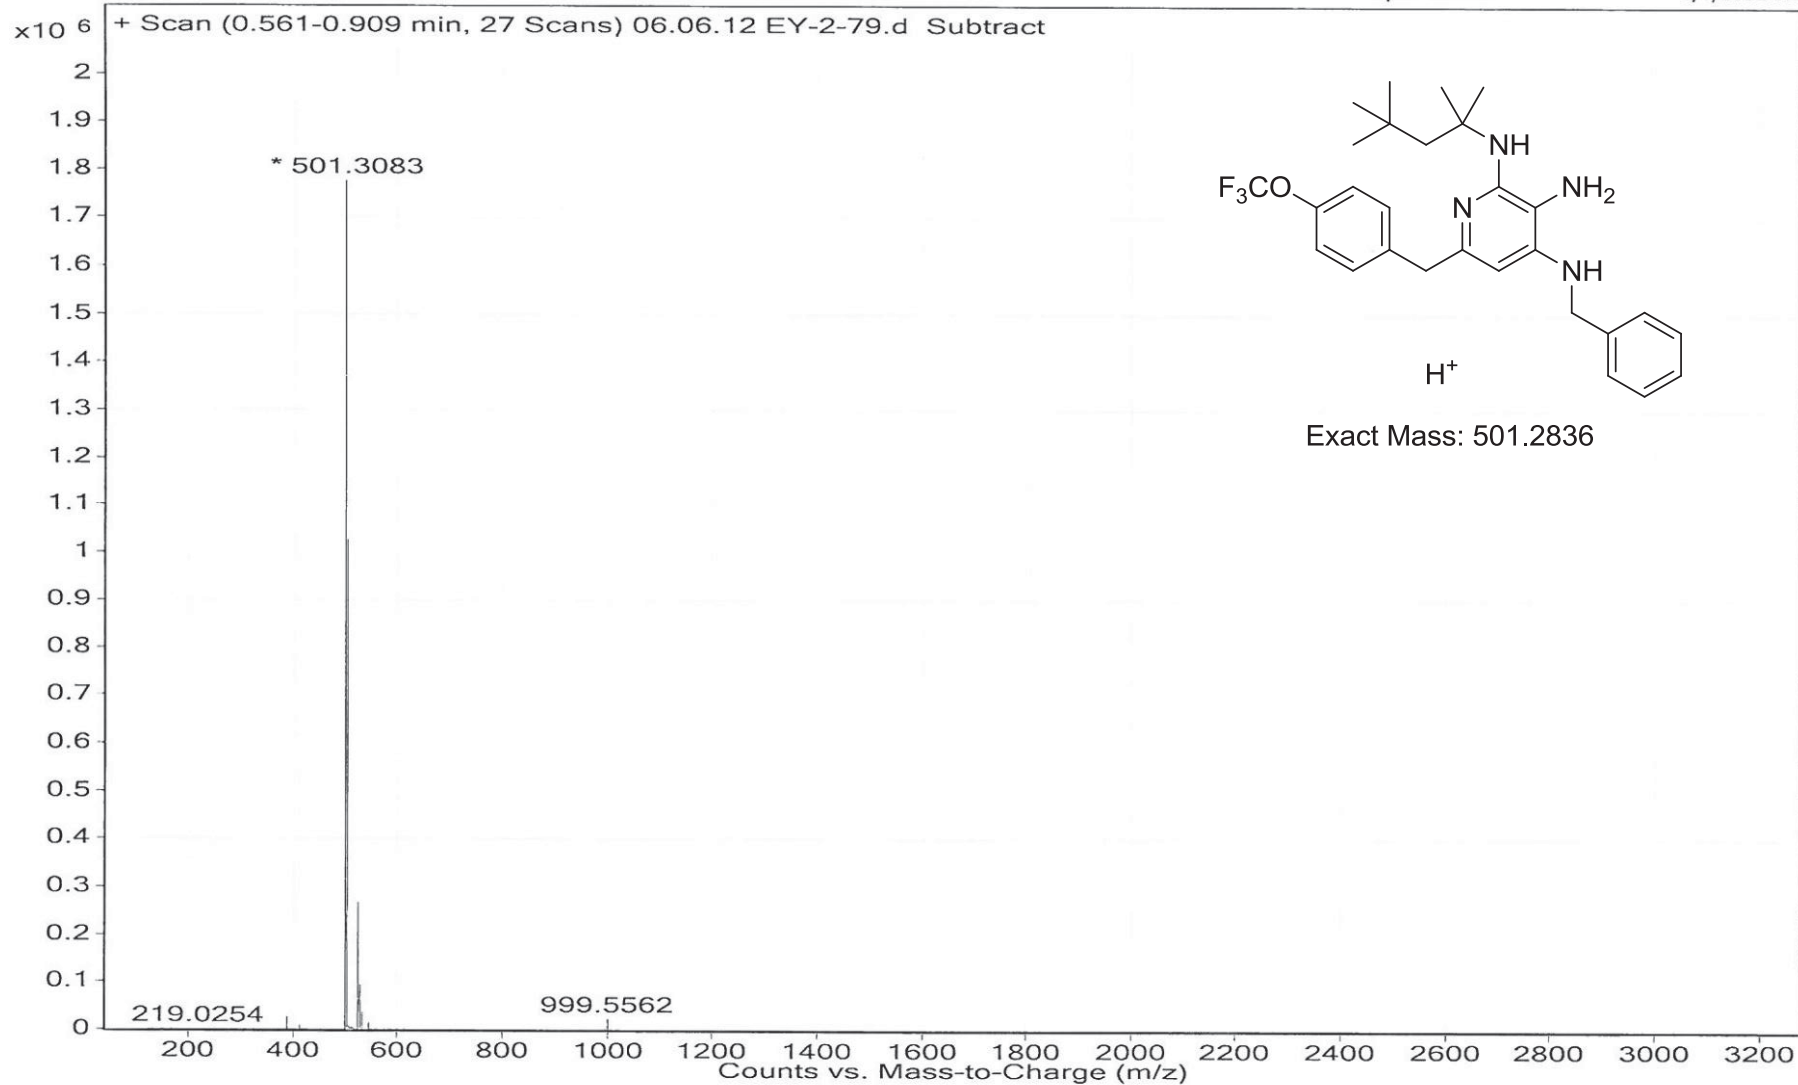

# 22i MS

|               |                    |             |                      |                 |              |                        |                      |
|---------------|--------------------|-------------|----------------------|-----------------|--------------|------------------------|----------------------|
| Sample Name   | 06.07.12 EY-2-81   | Position    | Vial 1               | Instrument Name | Instrument 1 | User Name              |                      |
| Inj Vol       | -1                 | InjPosition |                      | SampleType      | Sample       | IRM Calibration Status | Success              |
| Data Filename | 06.07.12 EY-2-81.d | ACQ Method  | Water-ACN Infusion M | Comment         |              | Acquired Time          | 6/7/2012 12:03:13 PM |

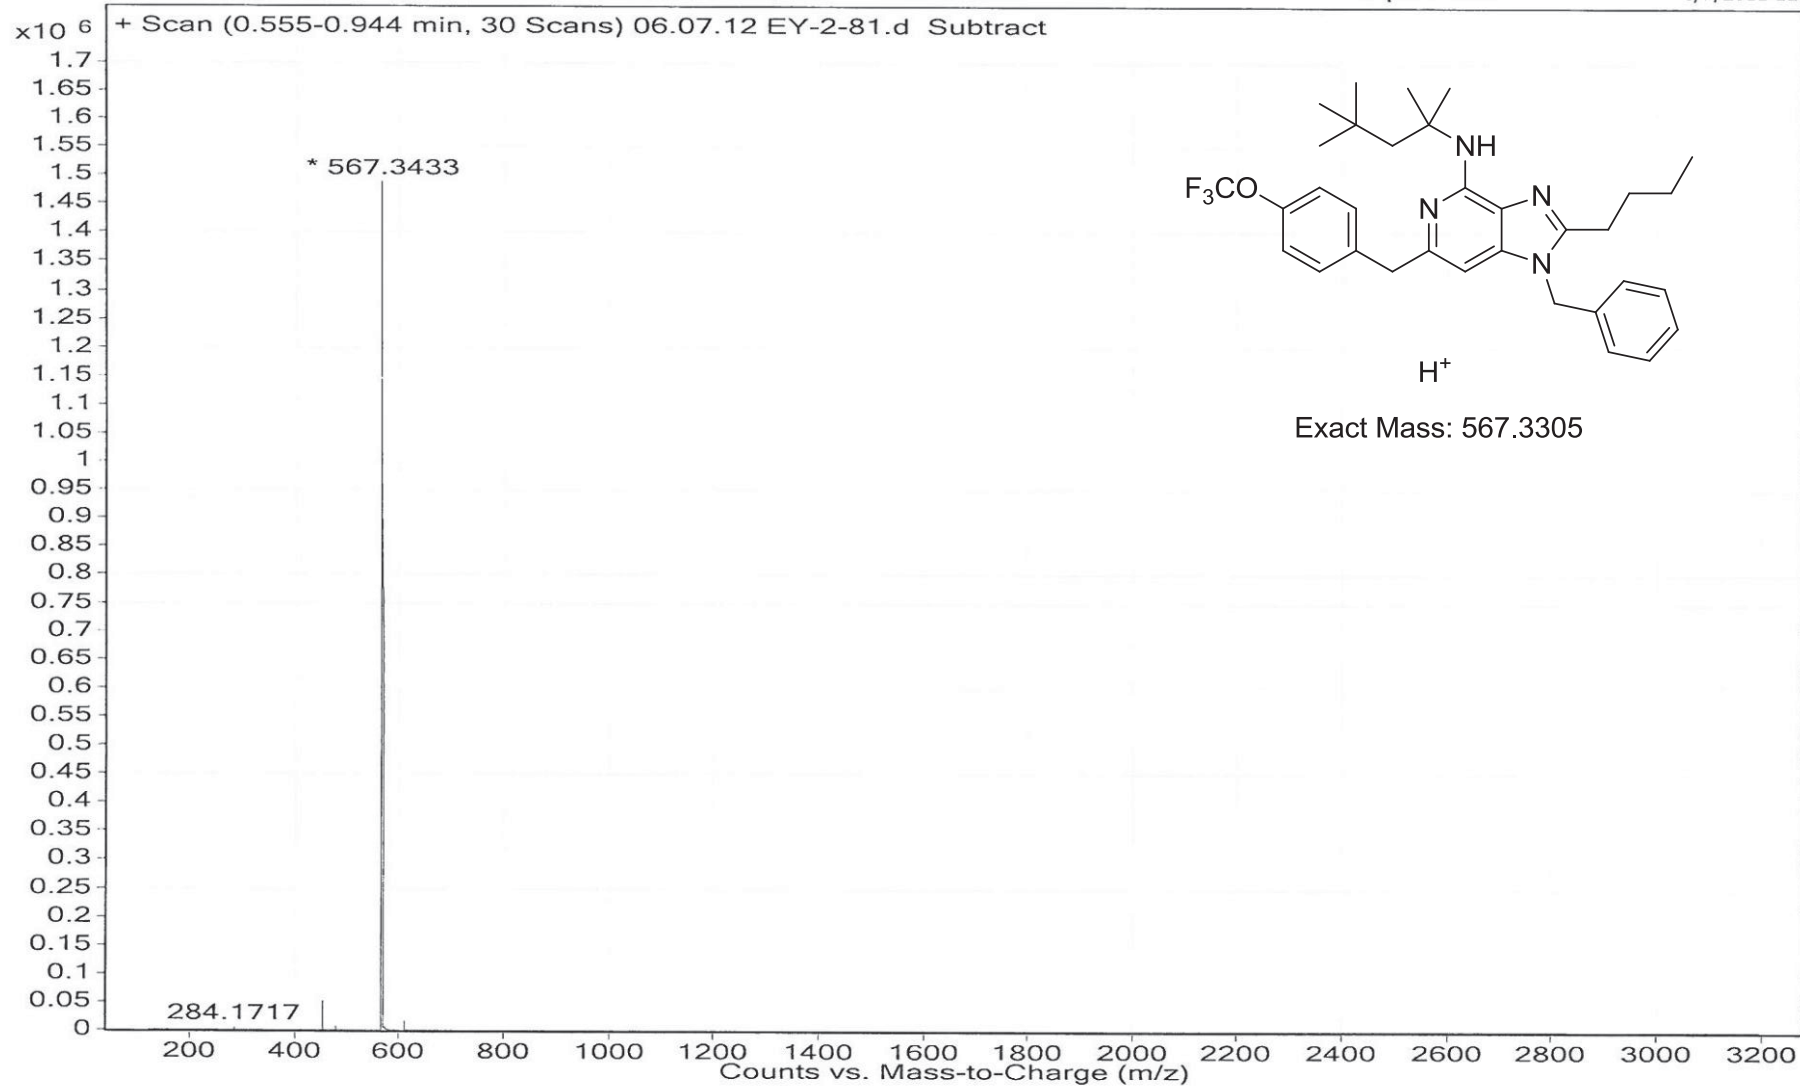



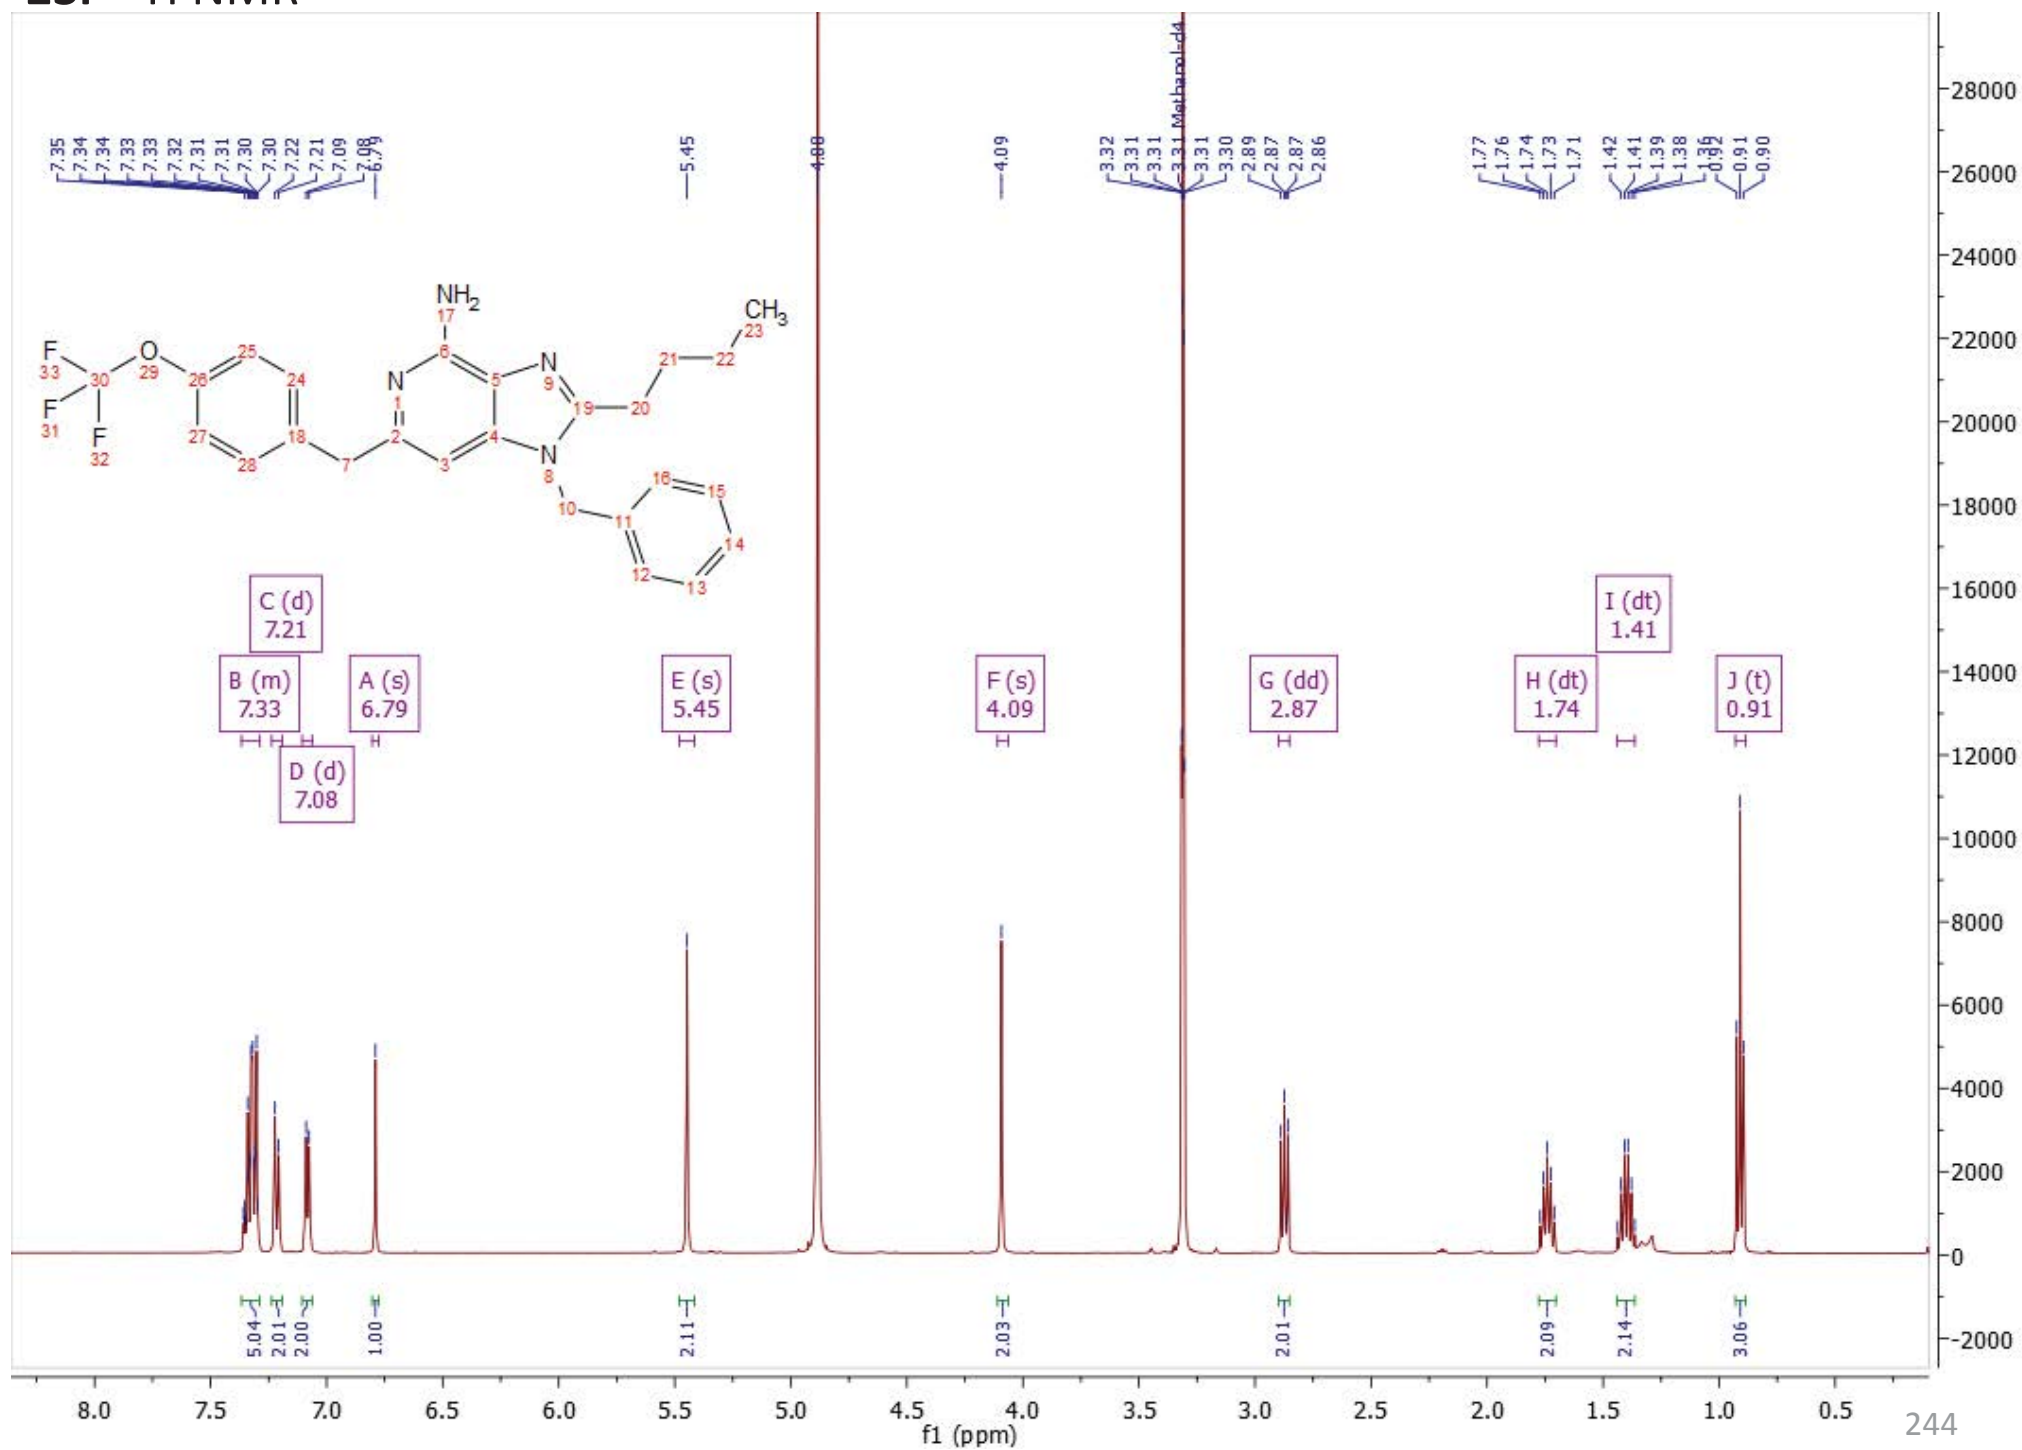

# <sup>23</sup>F <sup>13</sup>C NMR

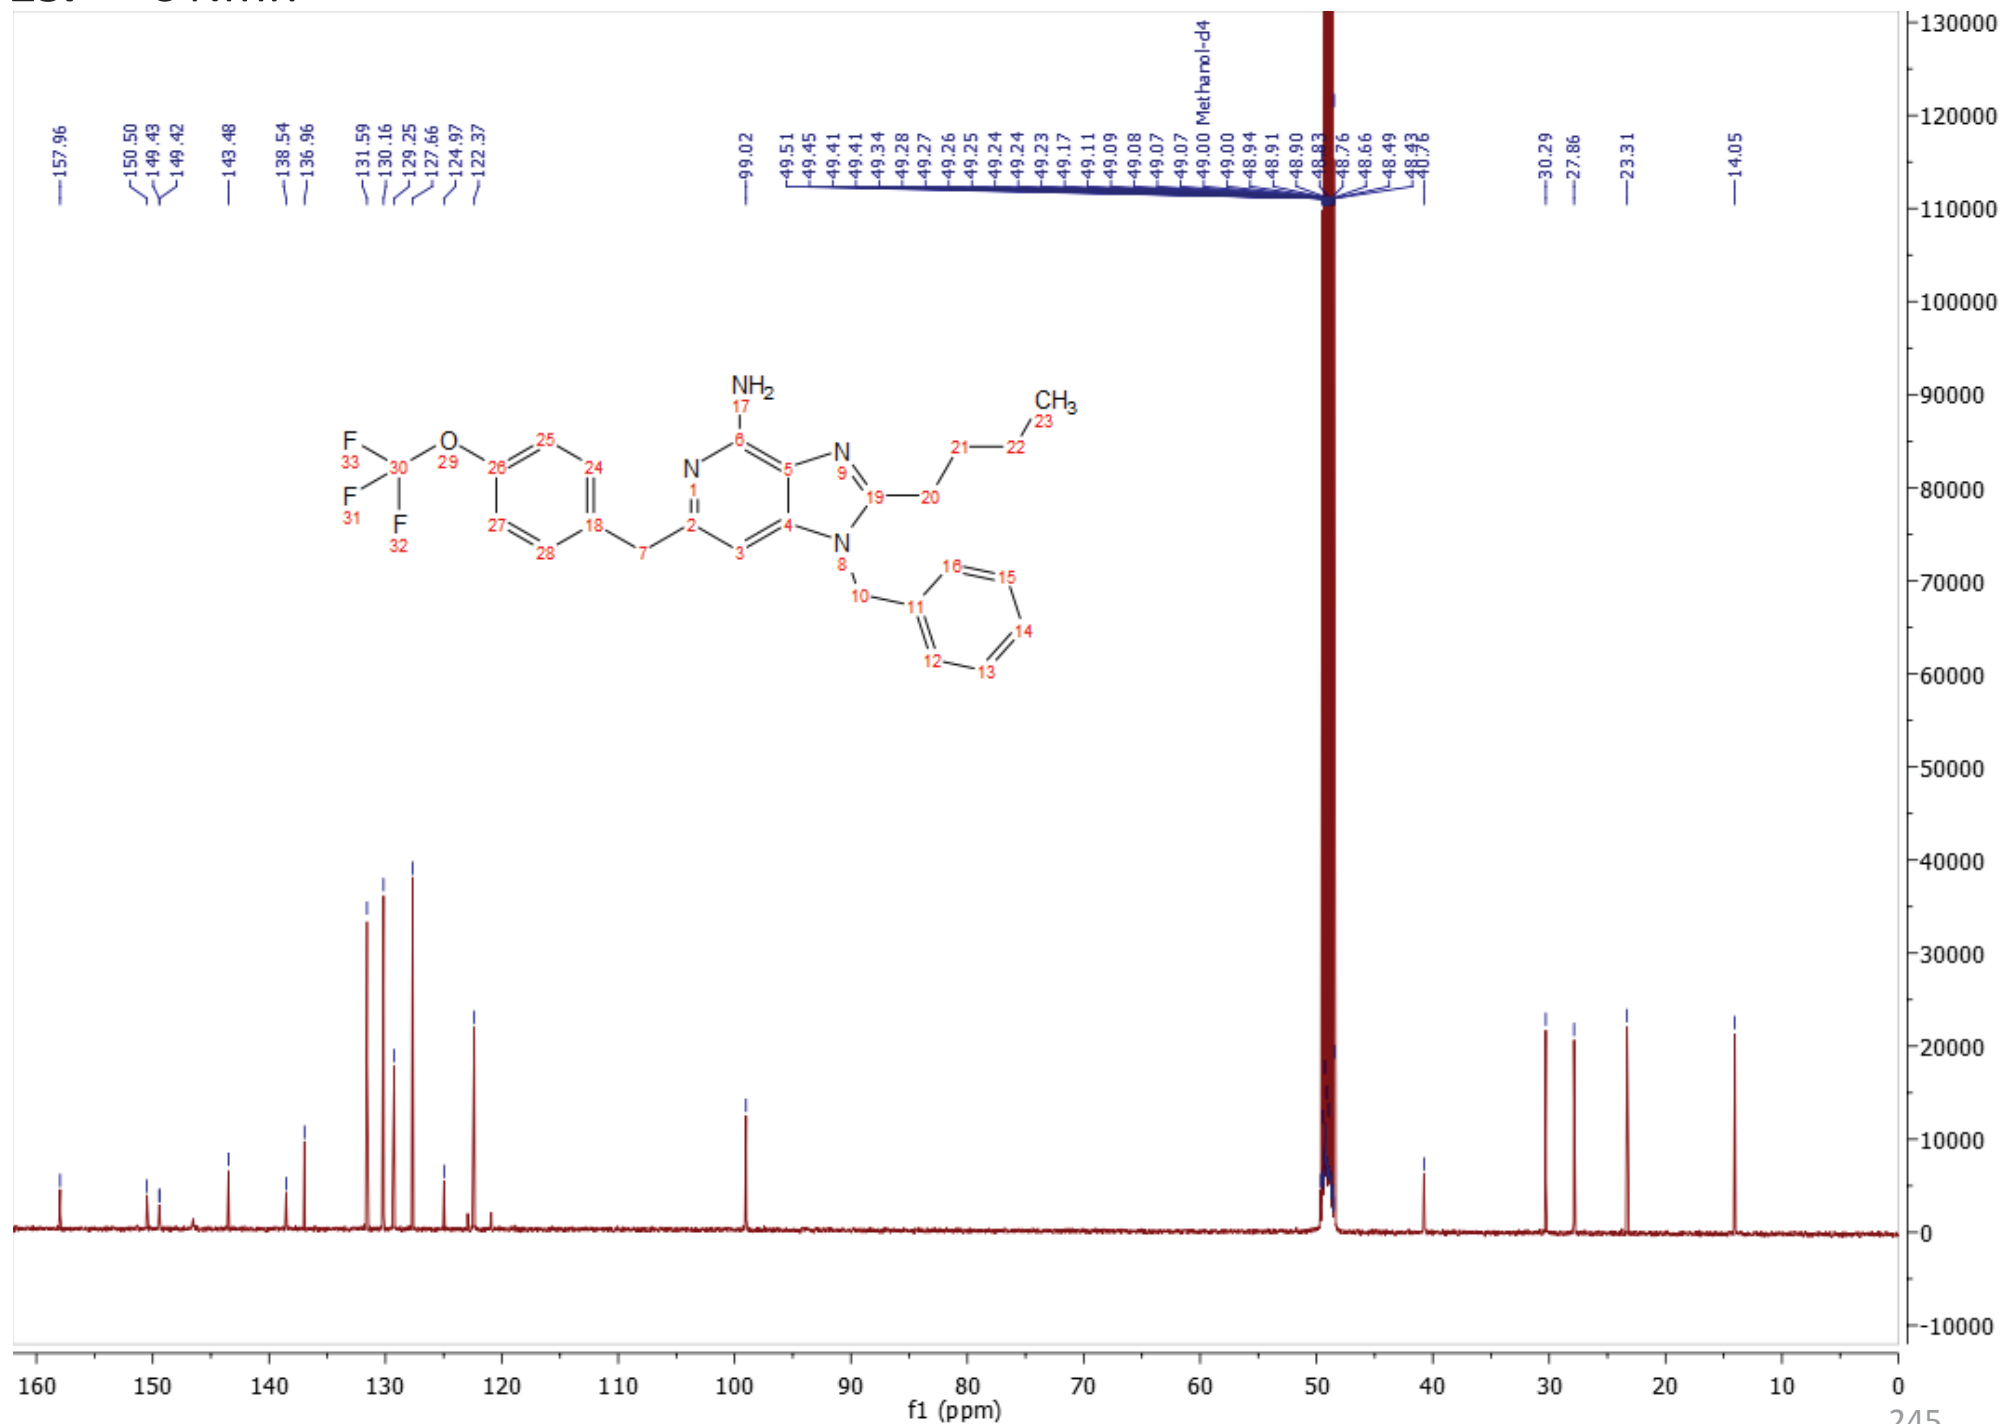

# 231 MS

|               |                    |             |                      |                 |              |                        |                     |
|---------------|--------------------|-------------|----------------------|-----------------|--------------|------------------------|---------------------|
| Sample Name   | 06.07.12 EY-2-82   | Position    | Vial 1               | Instrument Name | Instrument 1 | User Name              |                     |
| Inj Vol       | -1                 | InjPosition |                      | SampleType      | Sample       | IRM Calibration Status | Success             |
| Data Filename | 06.07.12 EY-2-82.d | ACQ Method  | Water-ACN Infusion M | Comment         |              | Acquired Time          | 6/7/2012 2:24:19 PM |

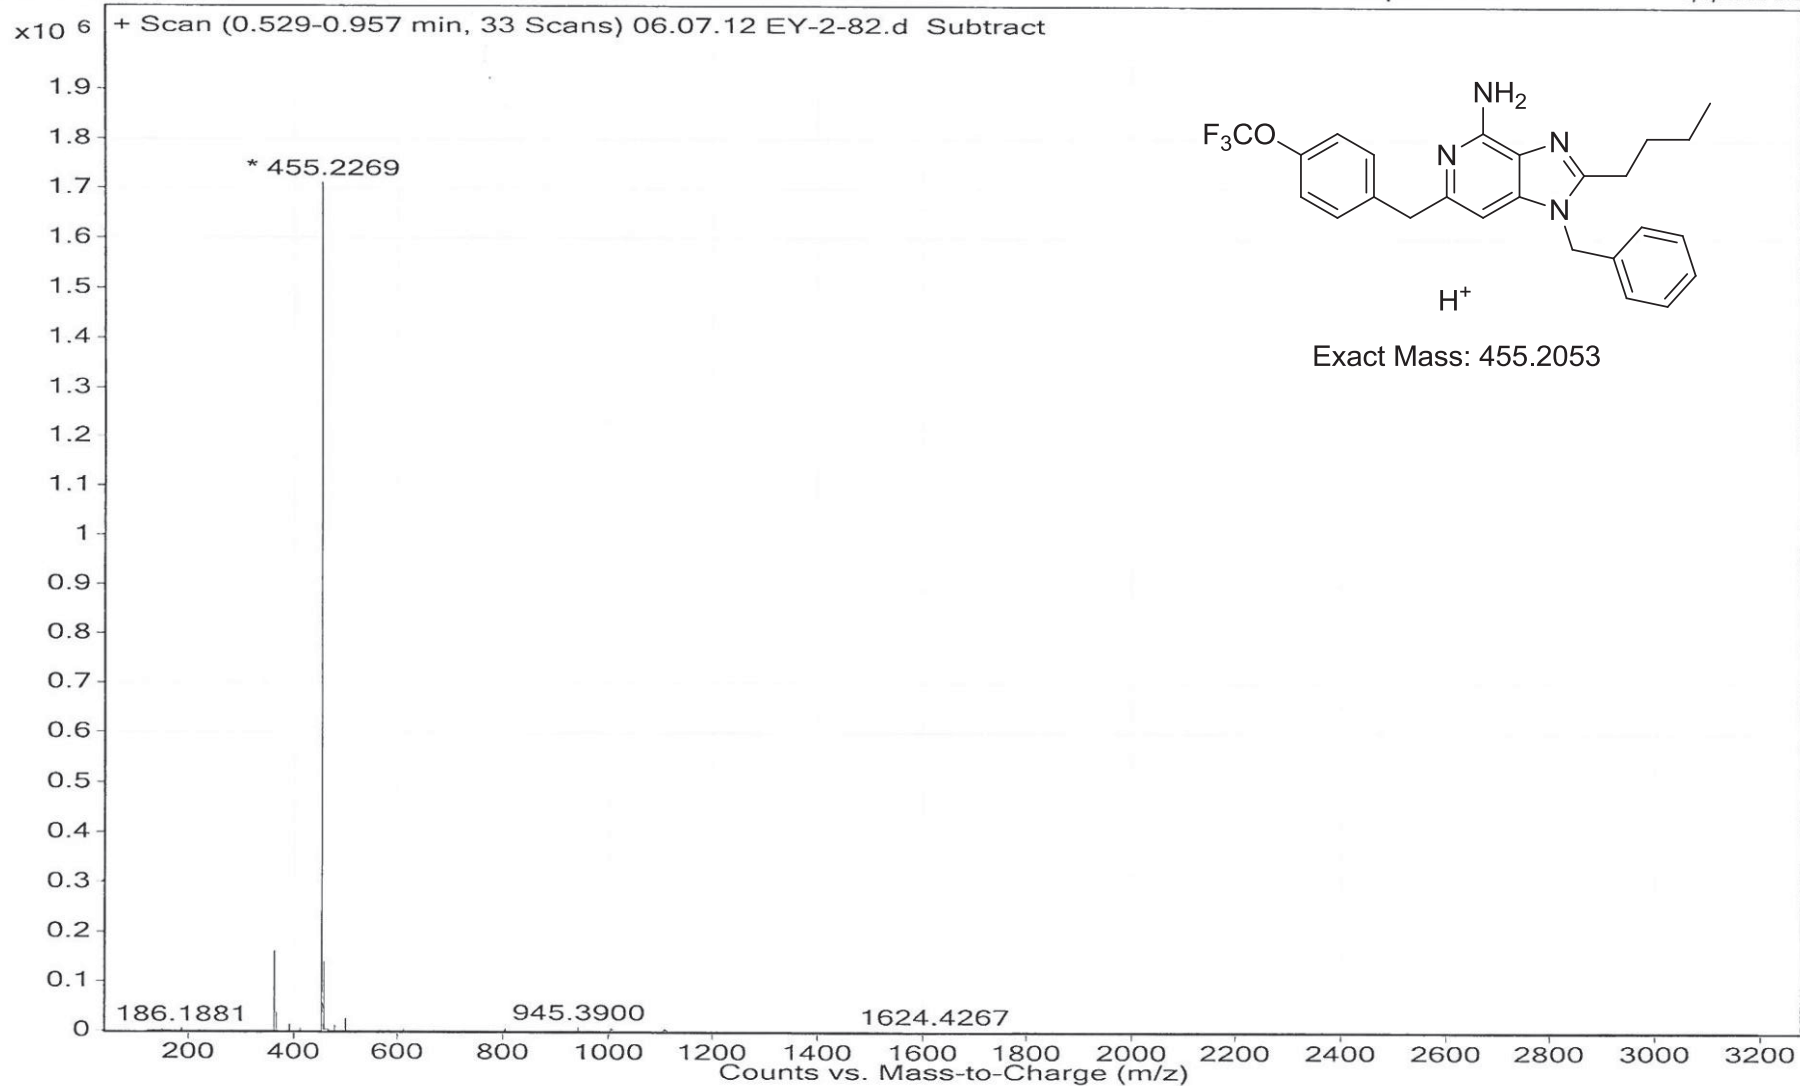

## 231 LC-MS

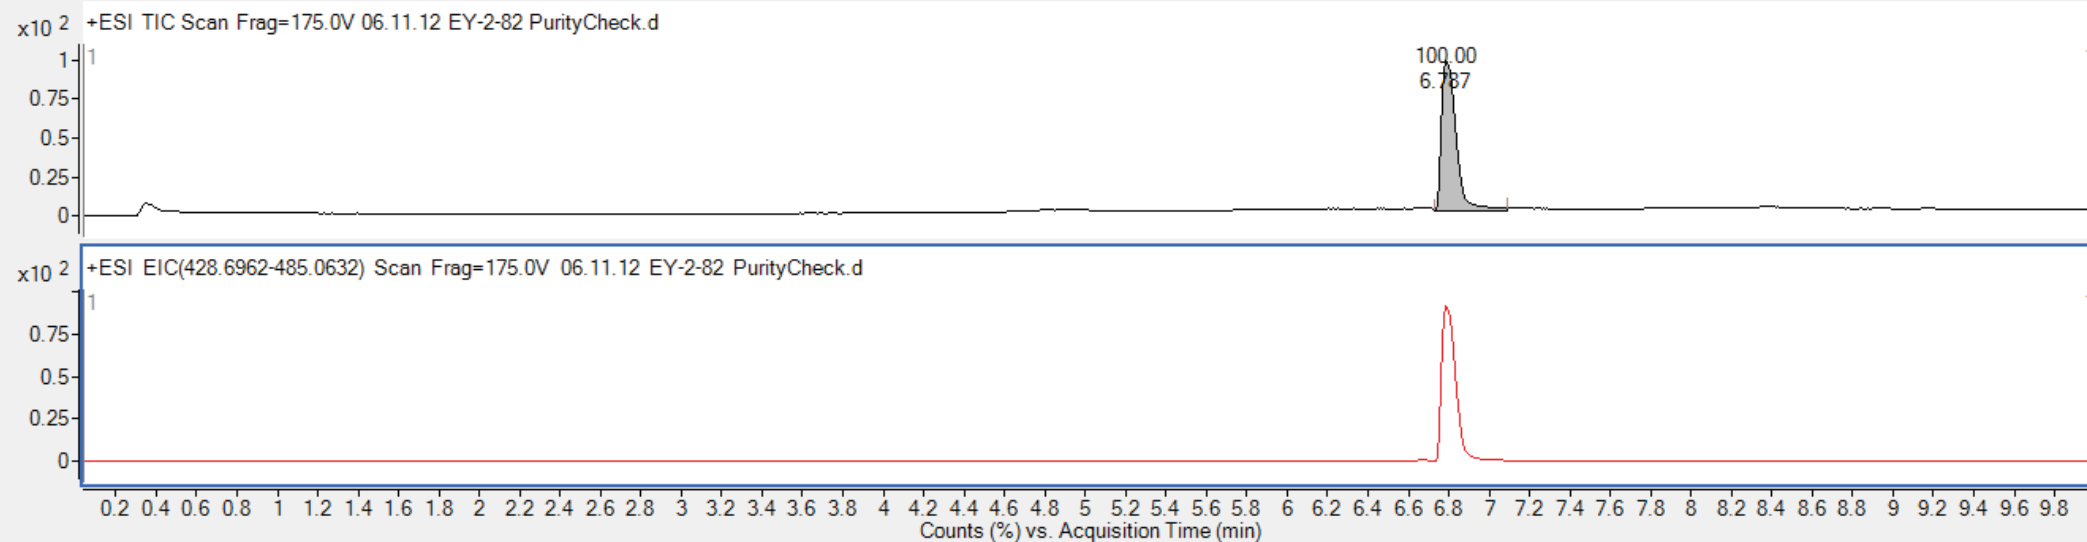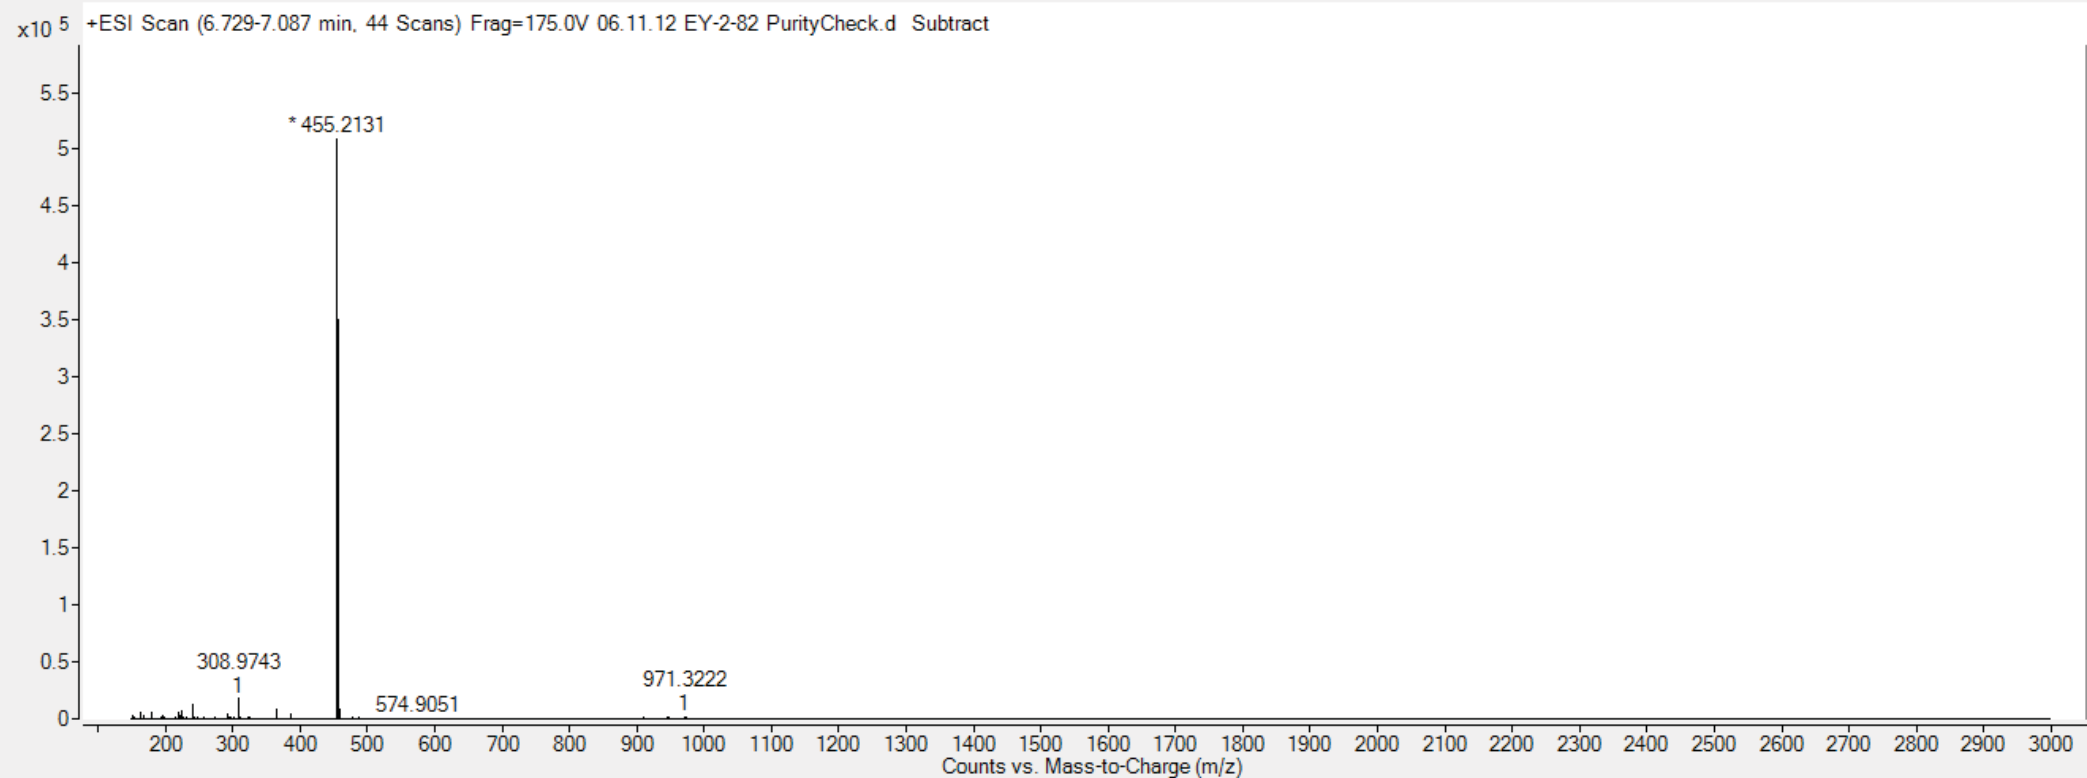

# 20j <sup>1</sup>H NMR

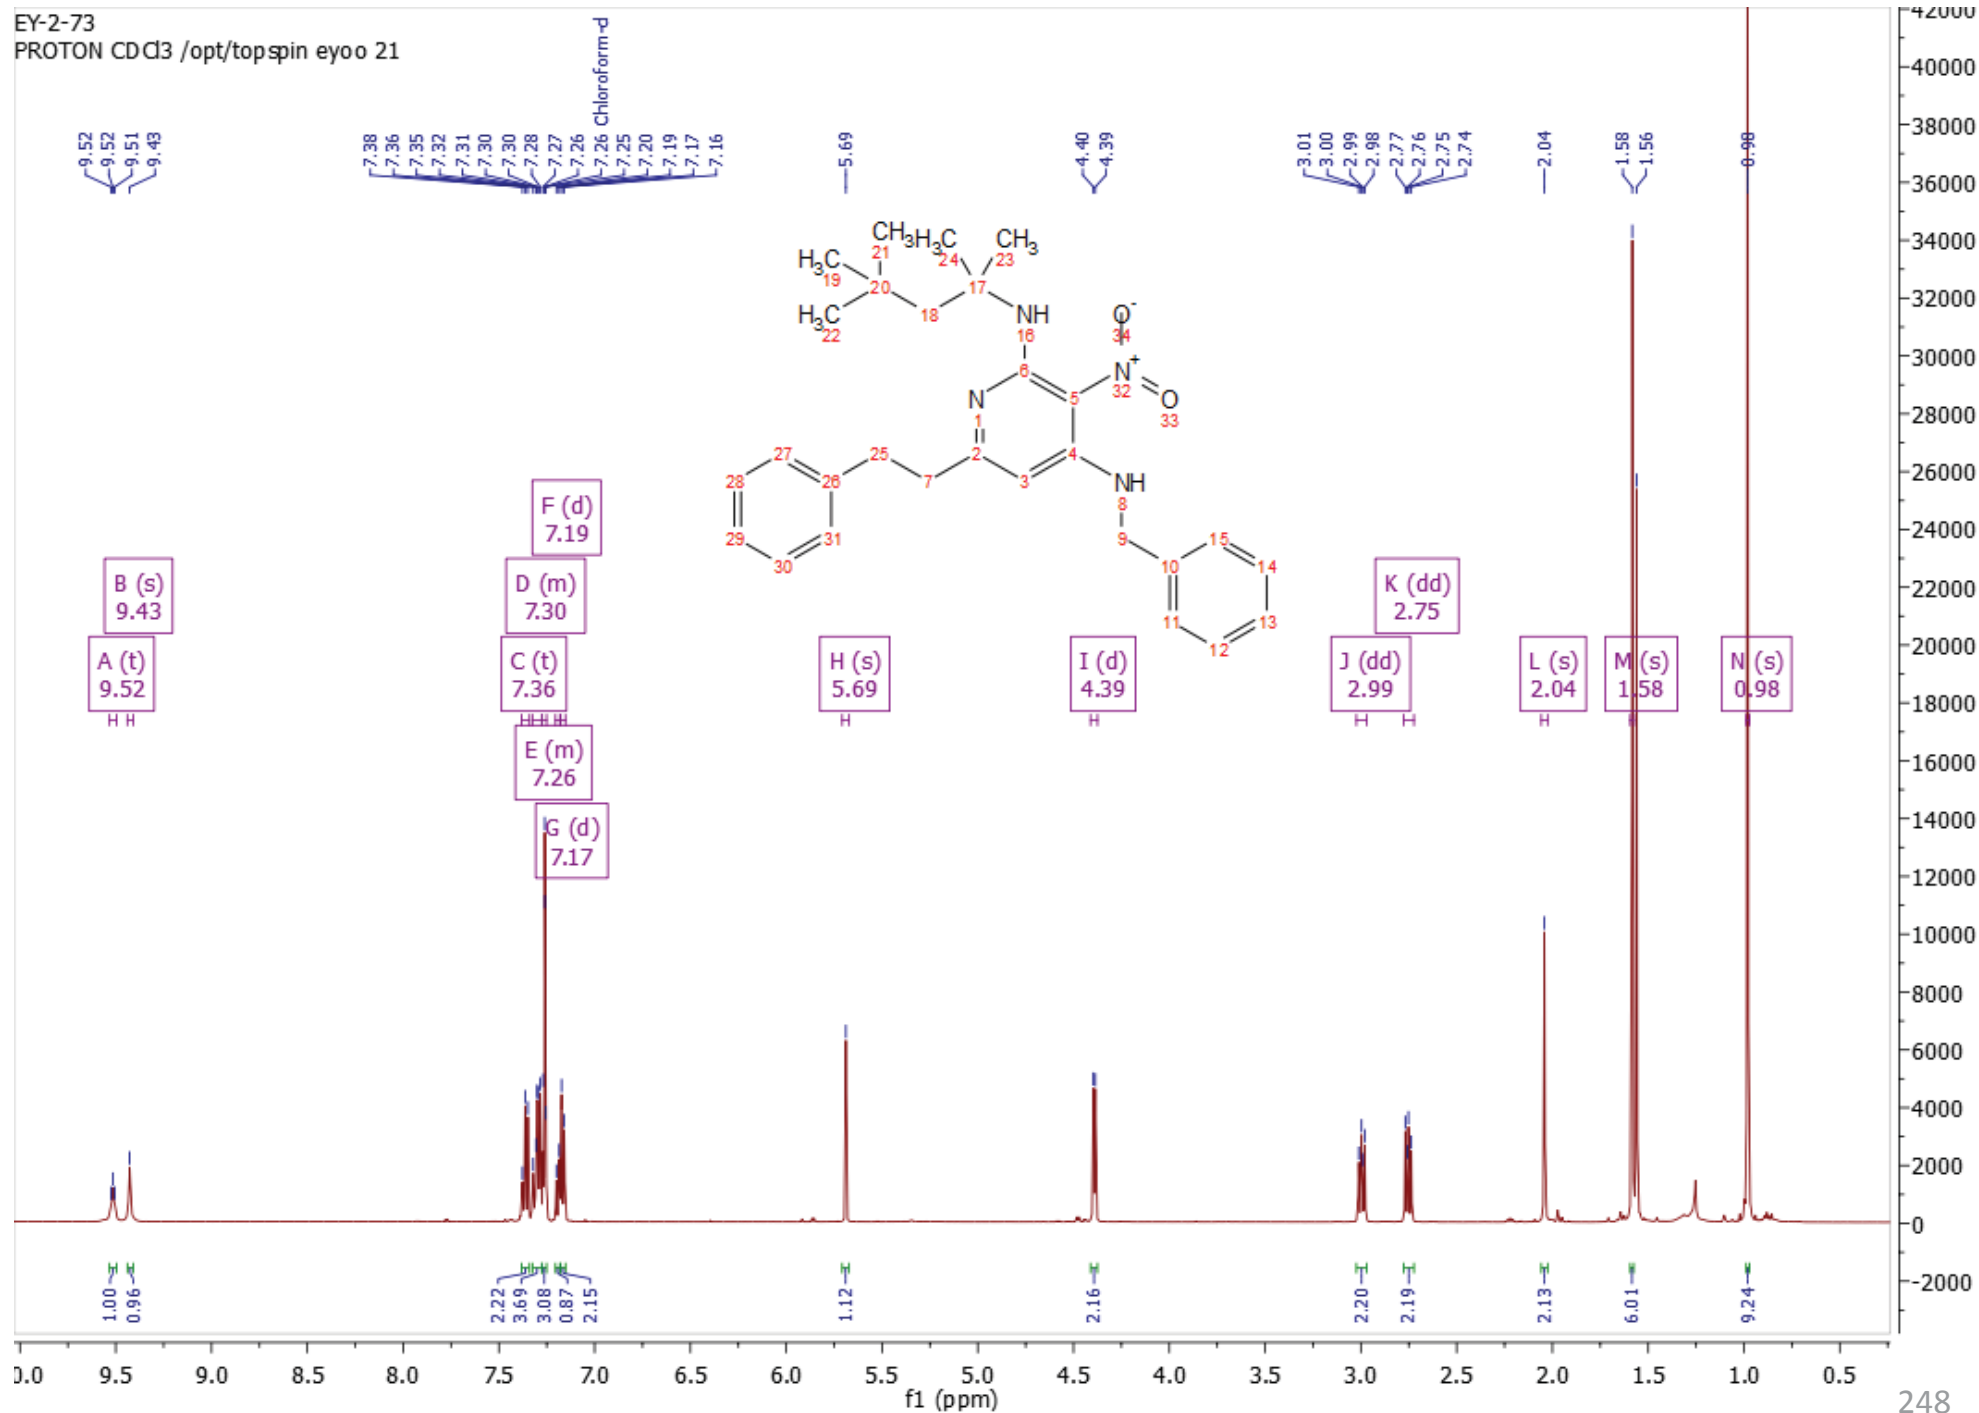

# <sup>20</sup>J <sup>13</sup>C NMR

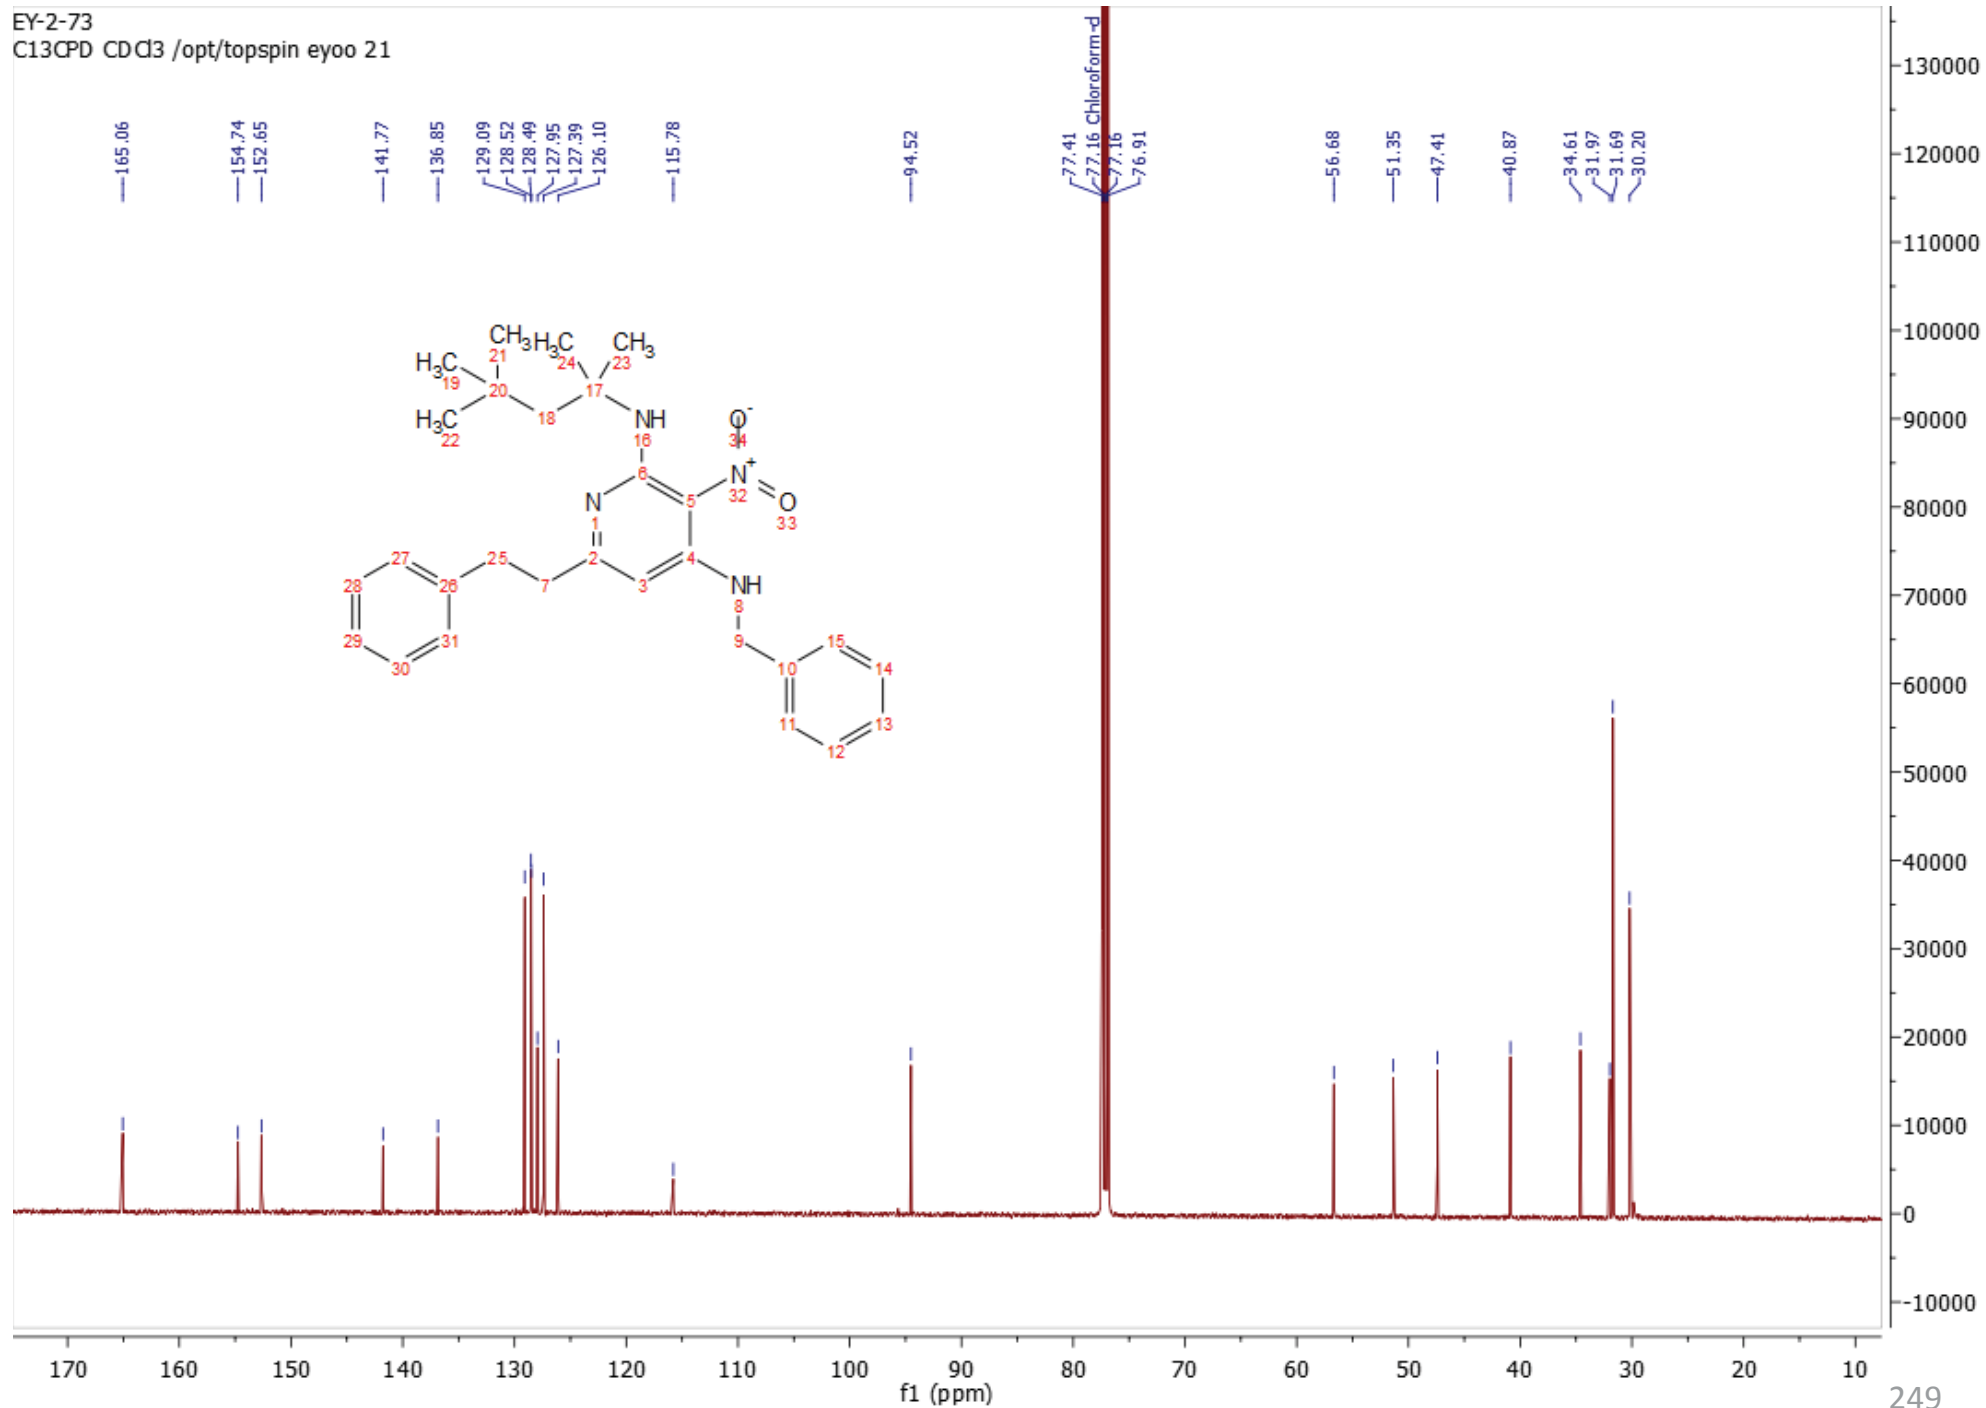

20j MS

| Sample Name   | 06.05.12 EY-2-73 tub | Position    | Vial 2               | Instrument Name | Instrument 1 | User Name              |                      |
|---------------|----------------------|-------------|----------------------|-----------------|--------------|------------------------|----------------------|
| Inj Vol       | -1                   | InjPosition |                      | SampleType      | Sample       | IRM Calibration Status | Success              |
| Data Filename | 06.05.12 EY-2-73 tub | ACQ Method  | Water-ACN Infusion M | Comment         |              | Acquired Time          | 6/5/2012 11:15:15 AM |

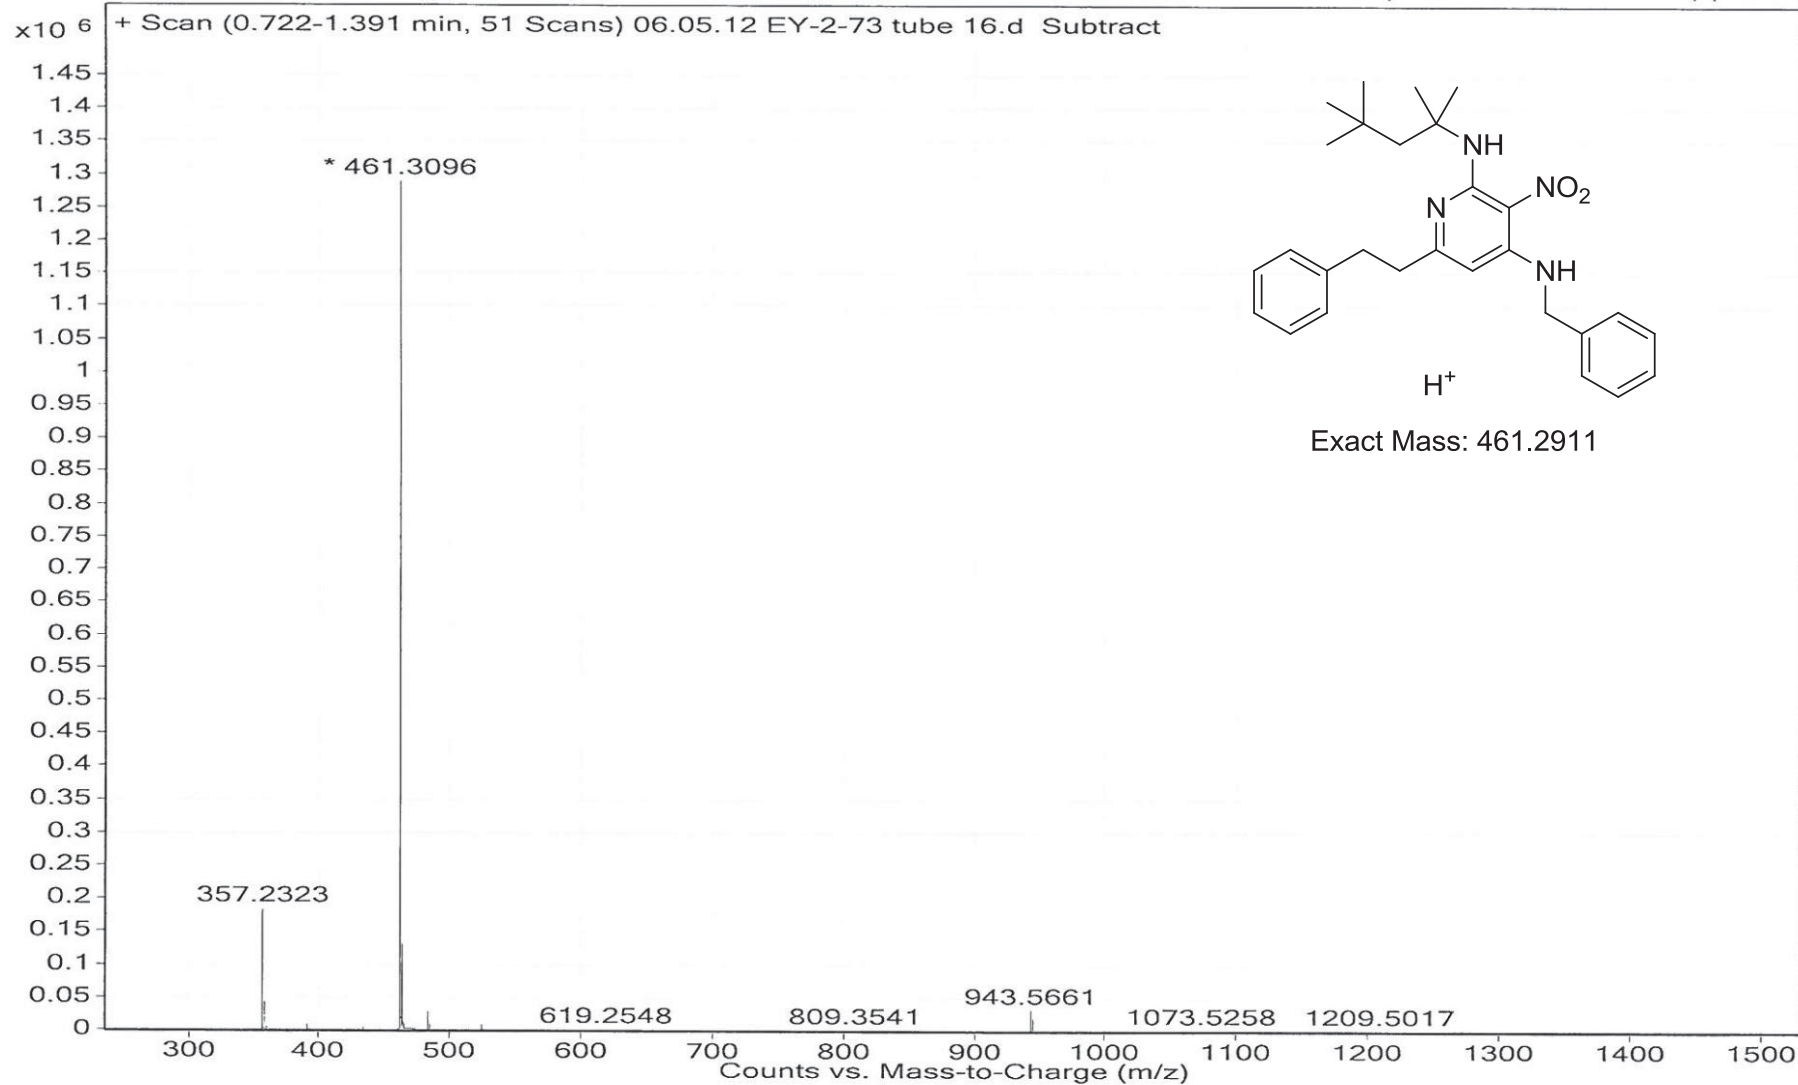



21j MS

|               |                      |             |                      |                 |              |                        |                     |
|---------------|----------------------|-------------|----------------------|-----------------|--------------|------------------------|---------------------|
| Sample Name   | 06.05.12 EY-2-75 tub | Position    | Vial 1               | Instrument Name | Instrument 1 | User Name              |                     |
| Inj Vol       | -1                   | InjPosition |                      | SampleType      | Sample       | IRM Calibration Status | Success             |
| Data Filename | 06.05.12 EY-2-75 tub | ACQ Method  | Water-ACN Infusion M | Comment         |              | Acquired Time          | 6/5/2012 3:41:23 PM |

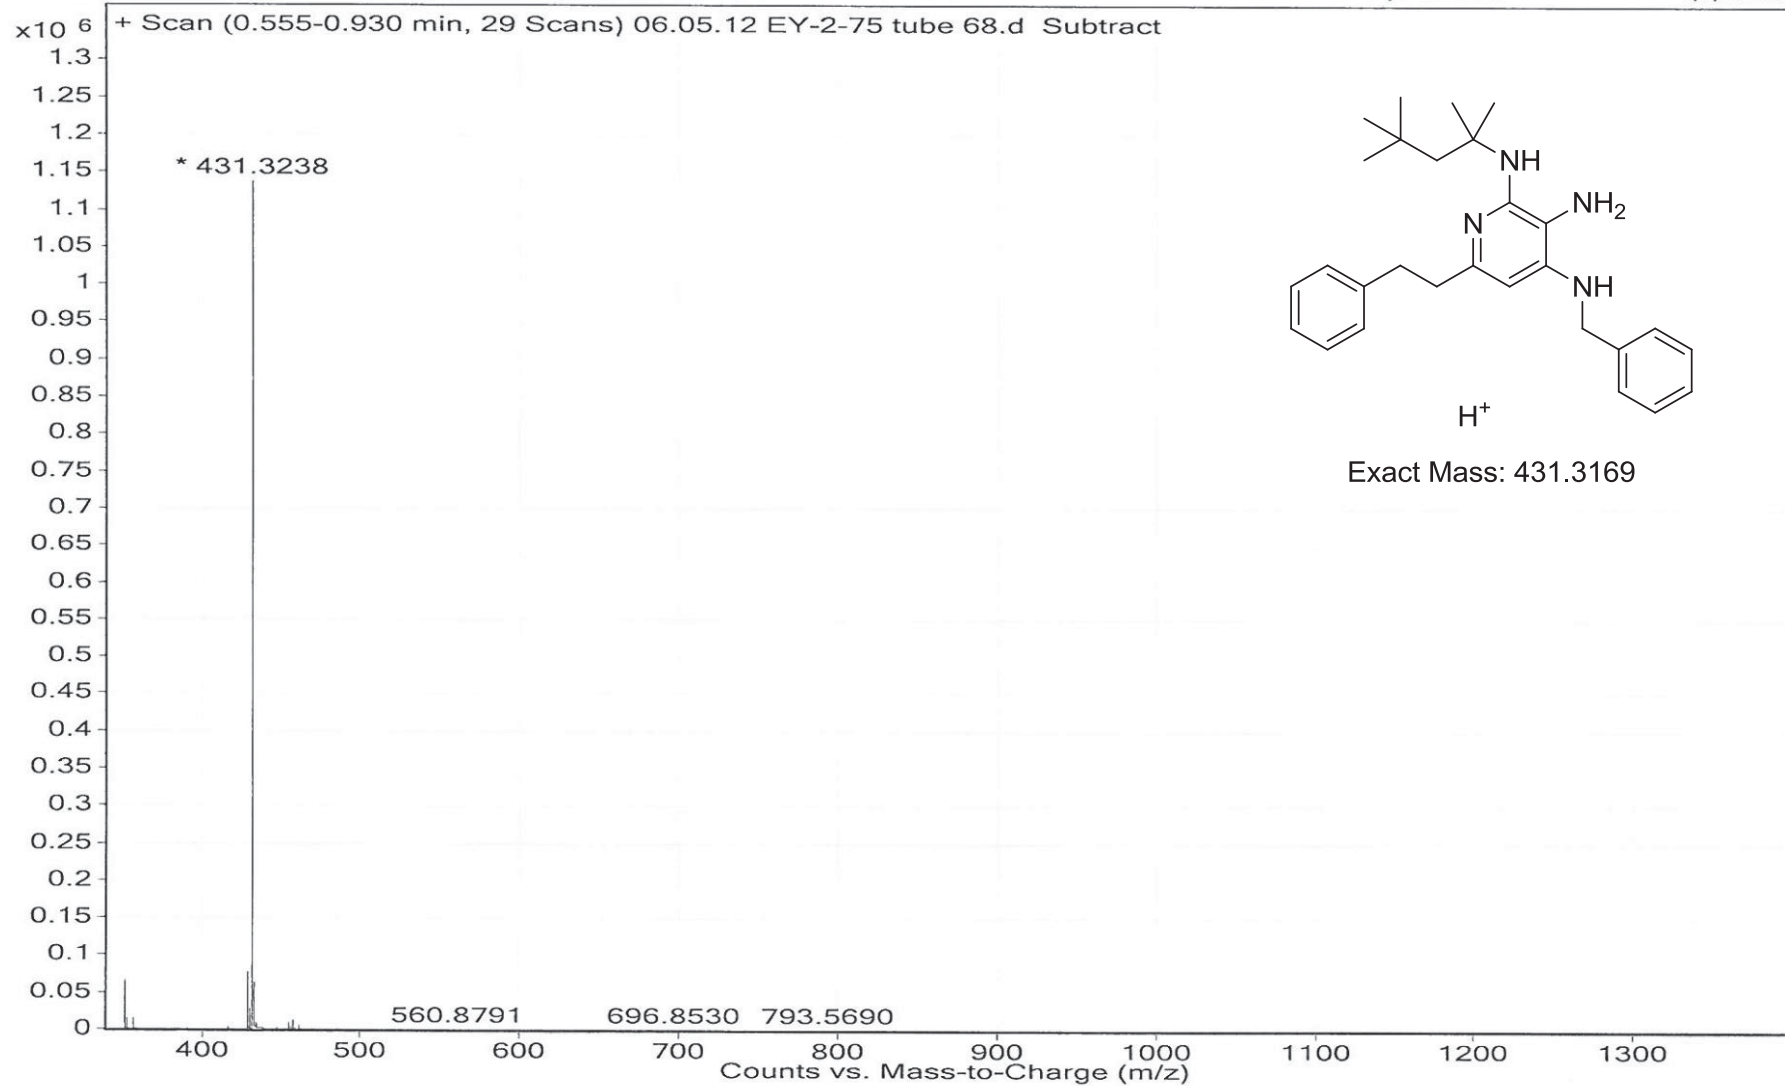

22j MS

|               |                      |             |                      |                 |              |                        |                     |
|---------------|----------------------|-------------|----------------------|-----------------|--------------|------------------------|---------------------|
| Sample Name   | 06.06.12 EY-2-78 tub | Position    | Vial 1               | Instrument Name | Instrument 1 | User Name              |                     |
| Inj Vol       | -1                   | InjPosition |                      | SampleType      | Sample       | IRM Calibration Status | Success             |
| Data Filename | 06.06.12 EY-2-78 tub | ACQ Method  | Water-ACN Infusion M | Comment         |              | Acquired Time          | 6/6/2012 1:31:15 PM |

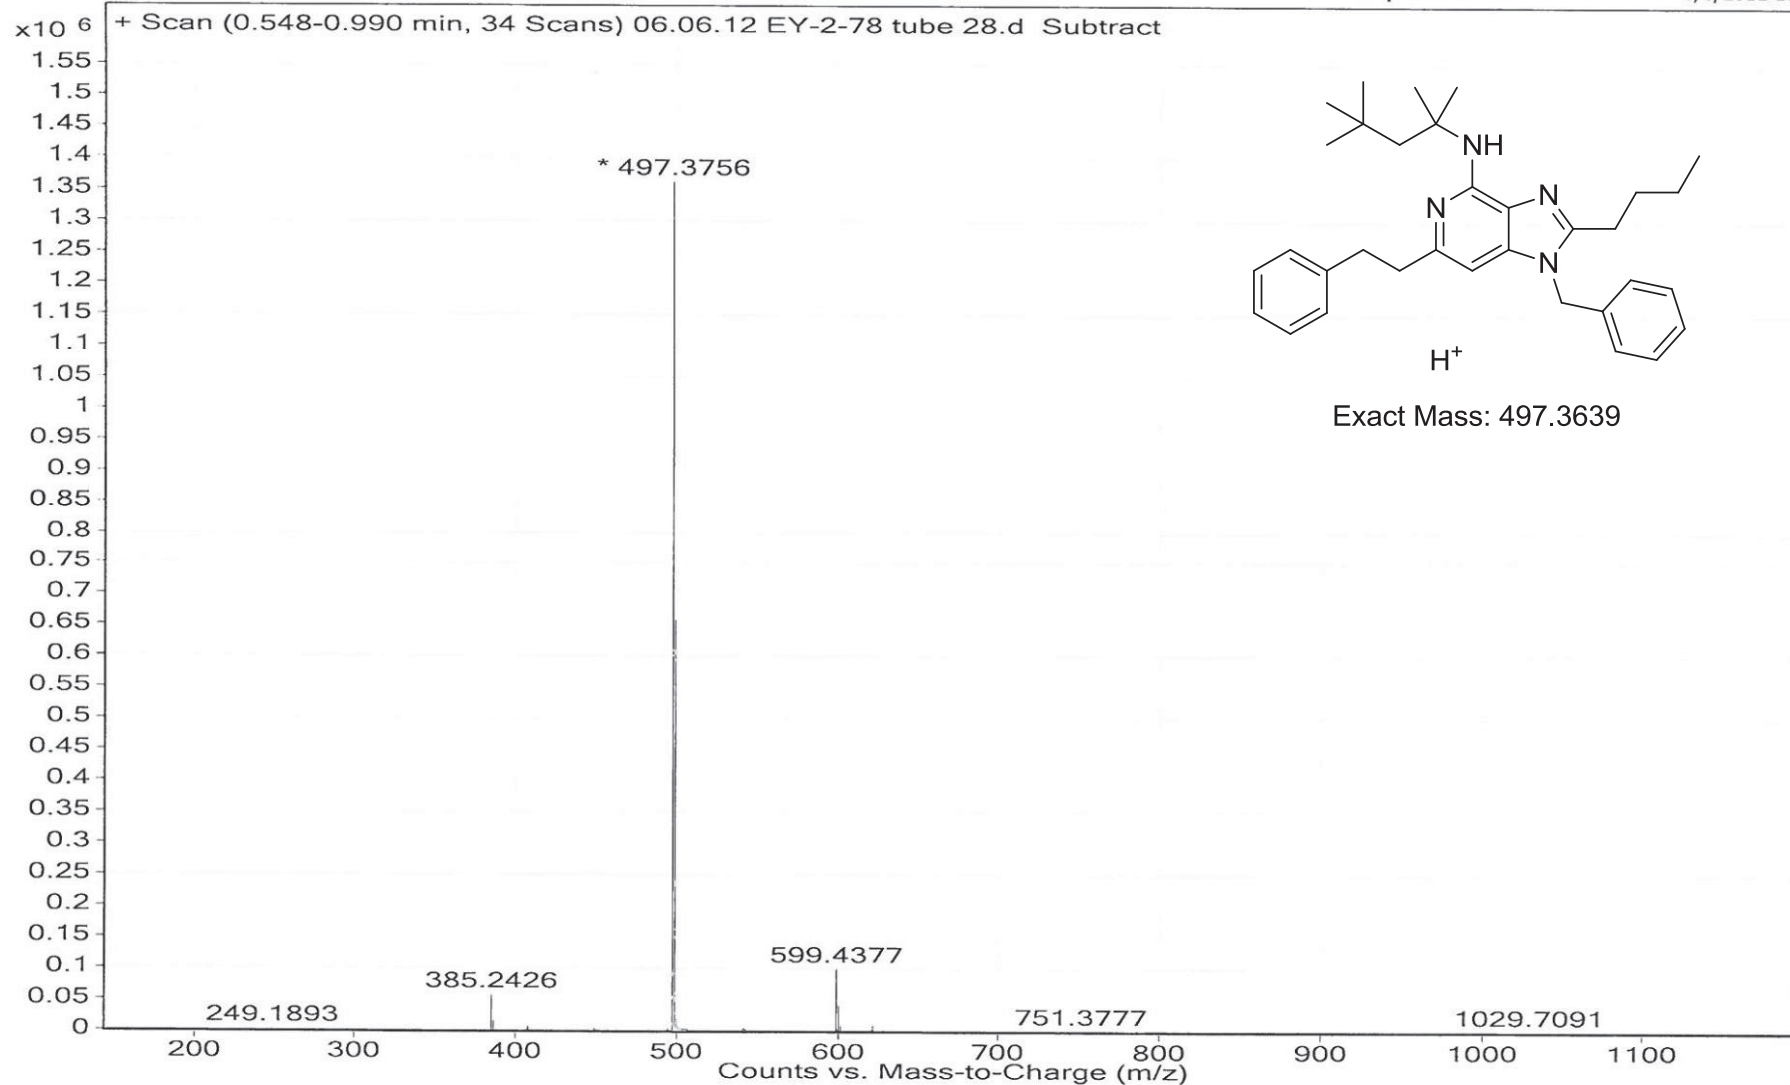

# 23j <sup>1</sup>H NMR

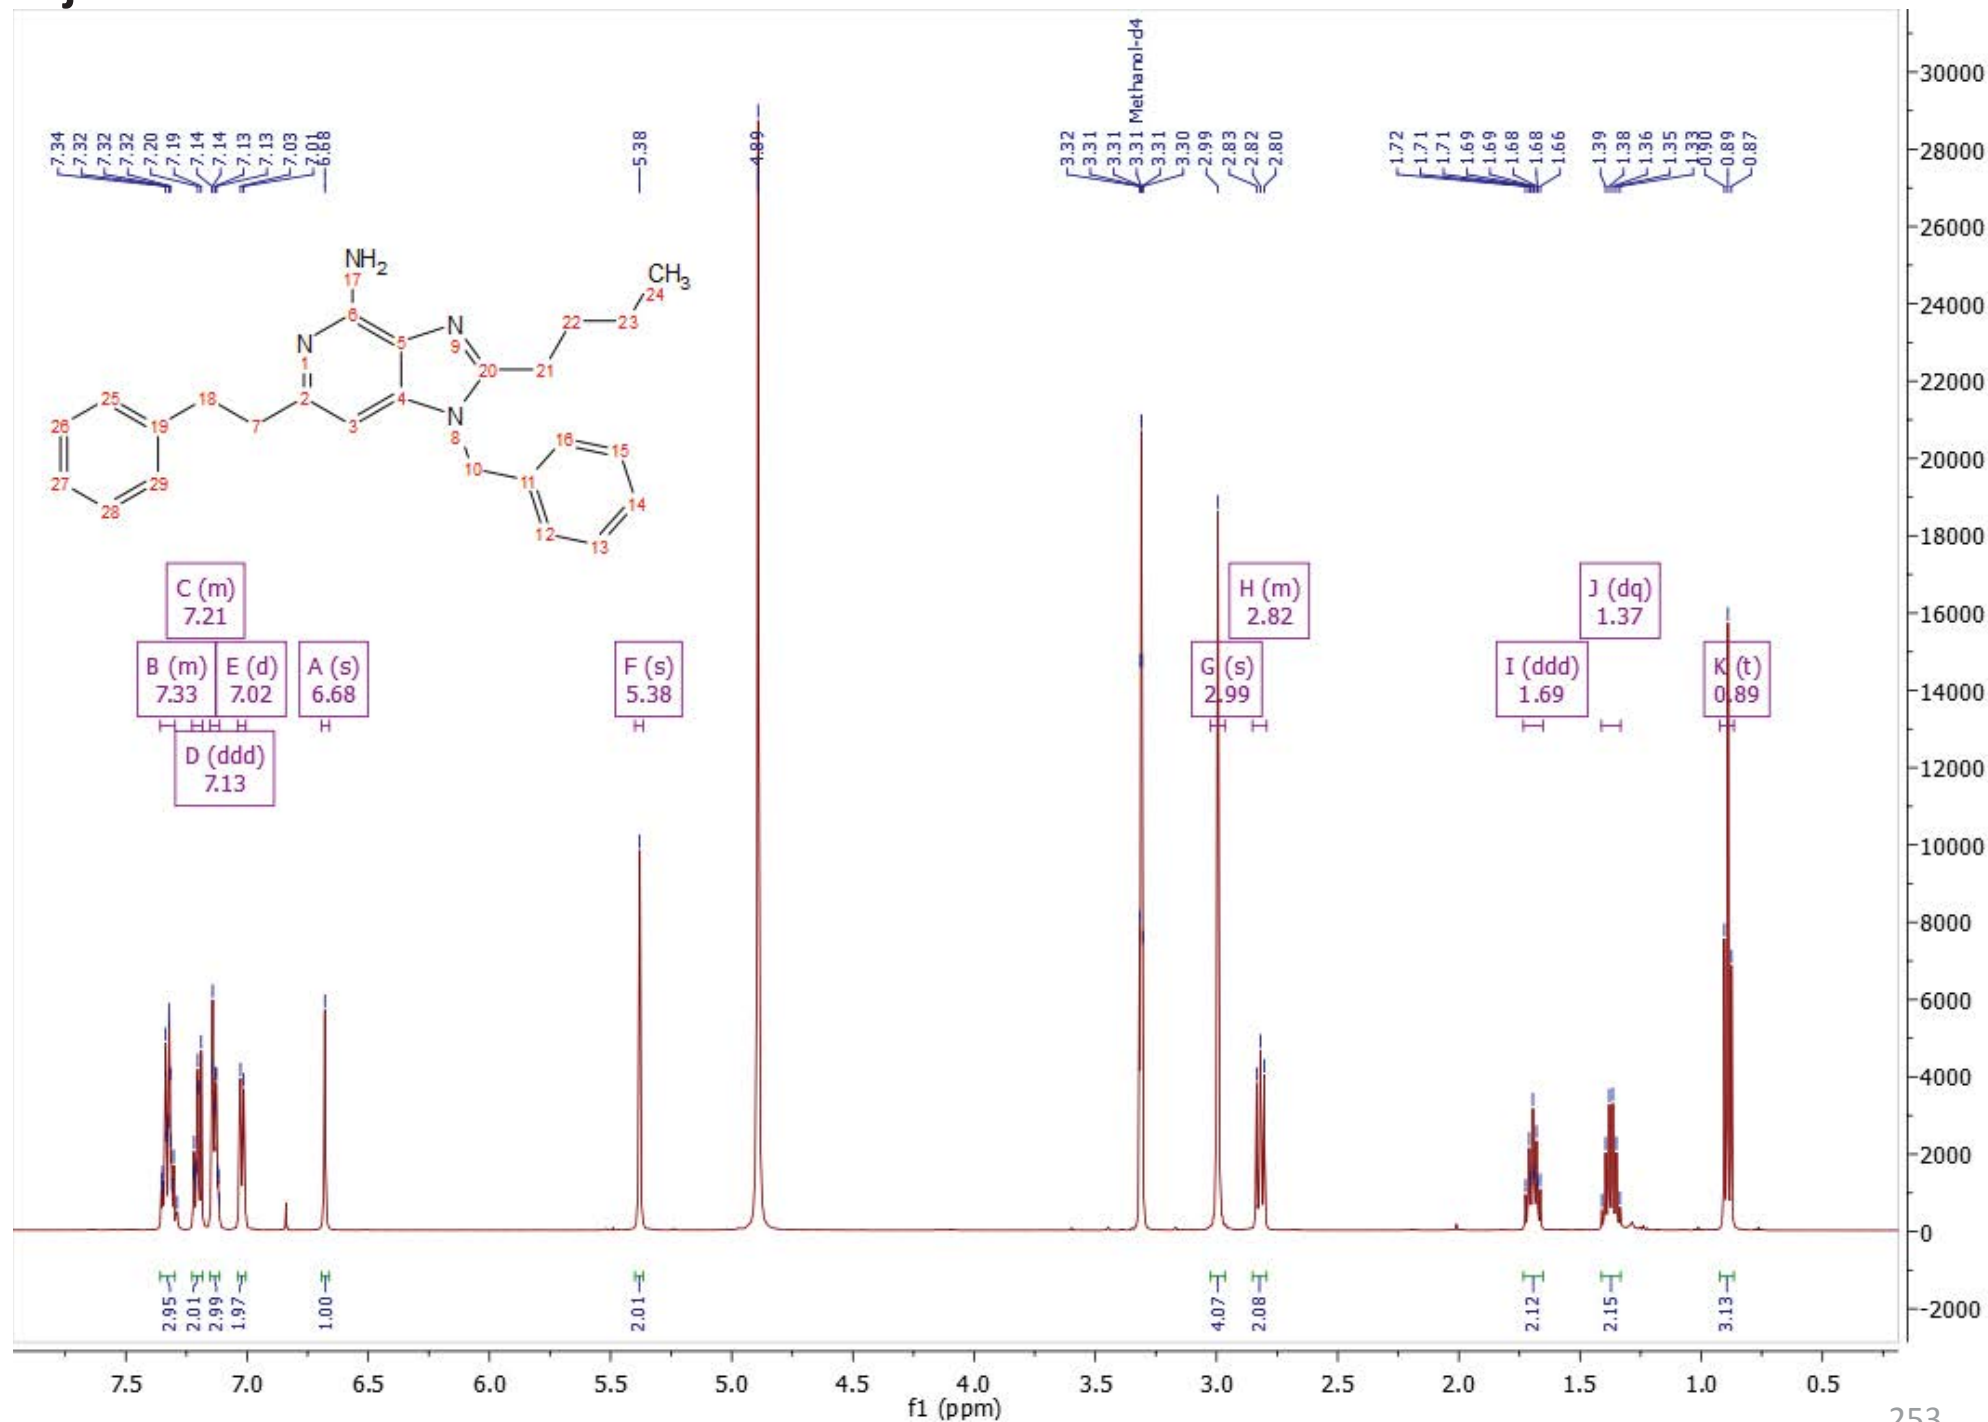

# 23j <sup>13</sup>C NMR

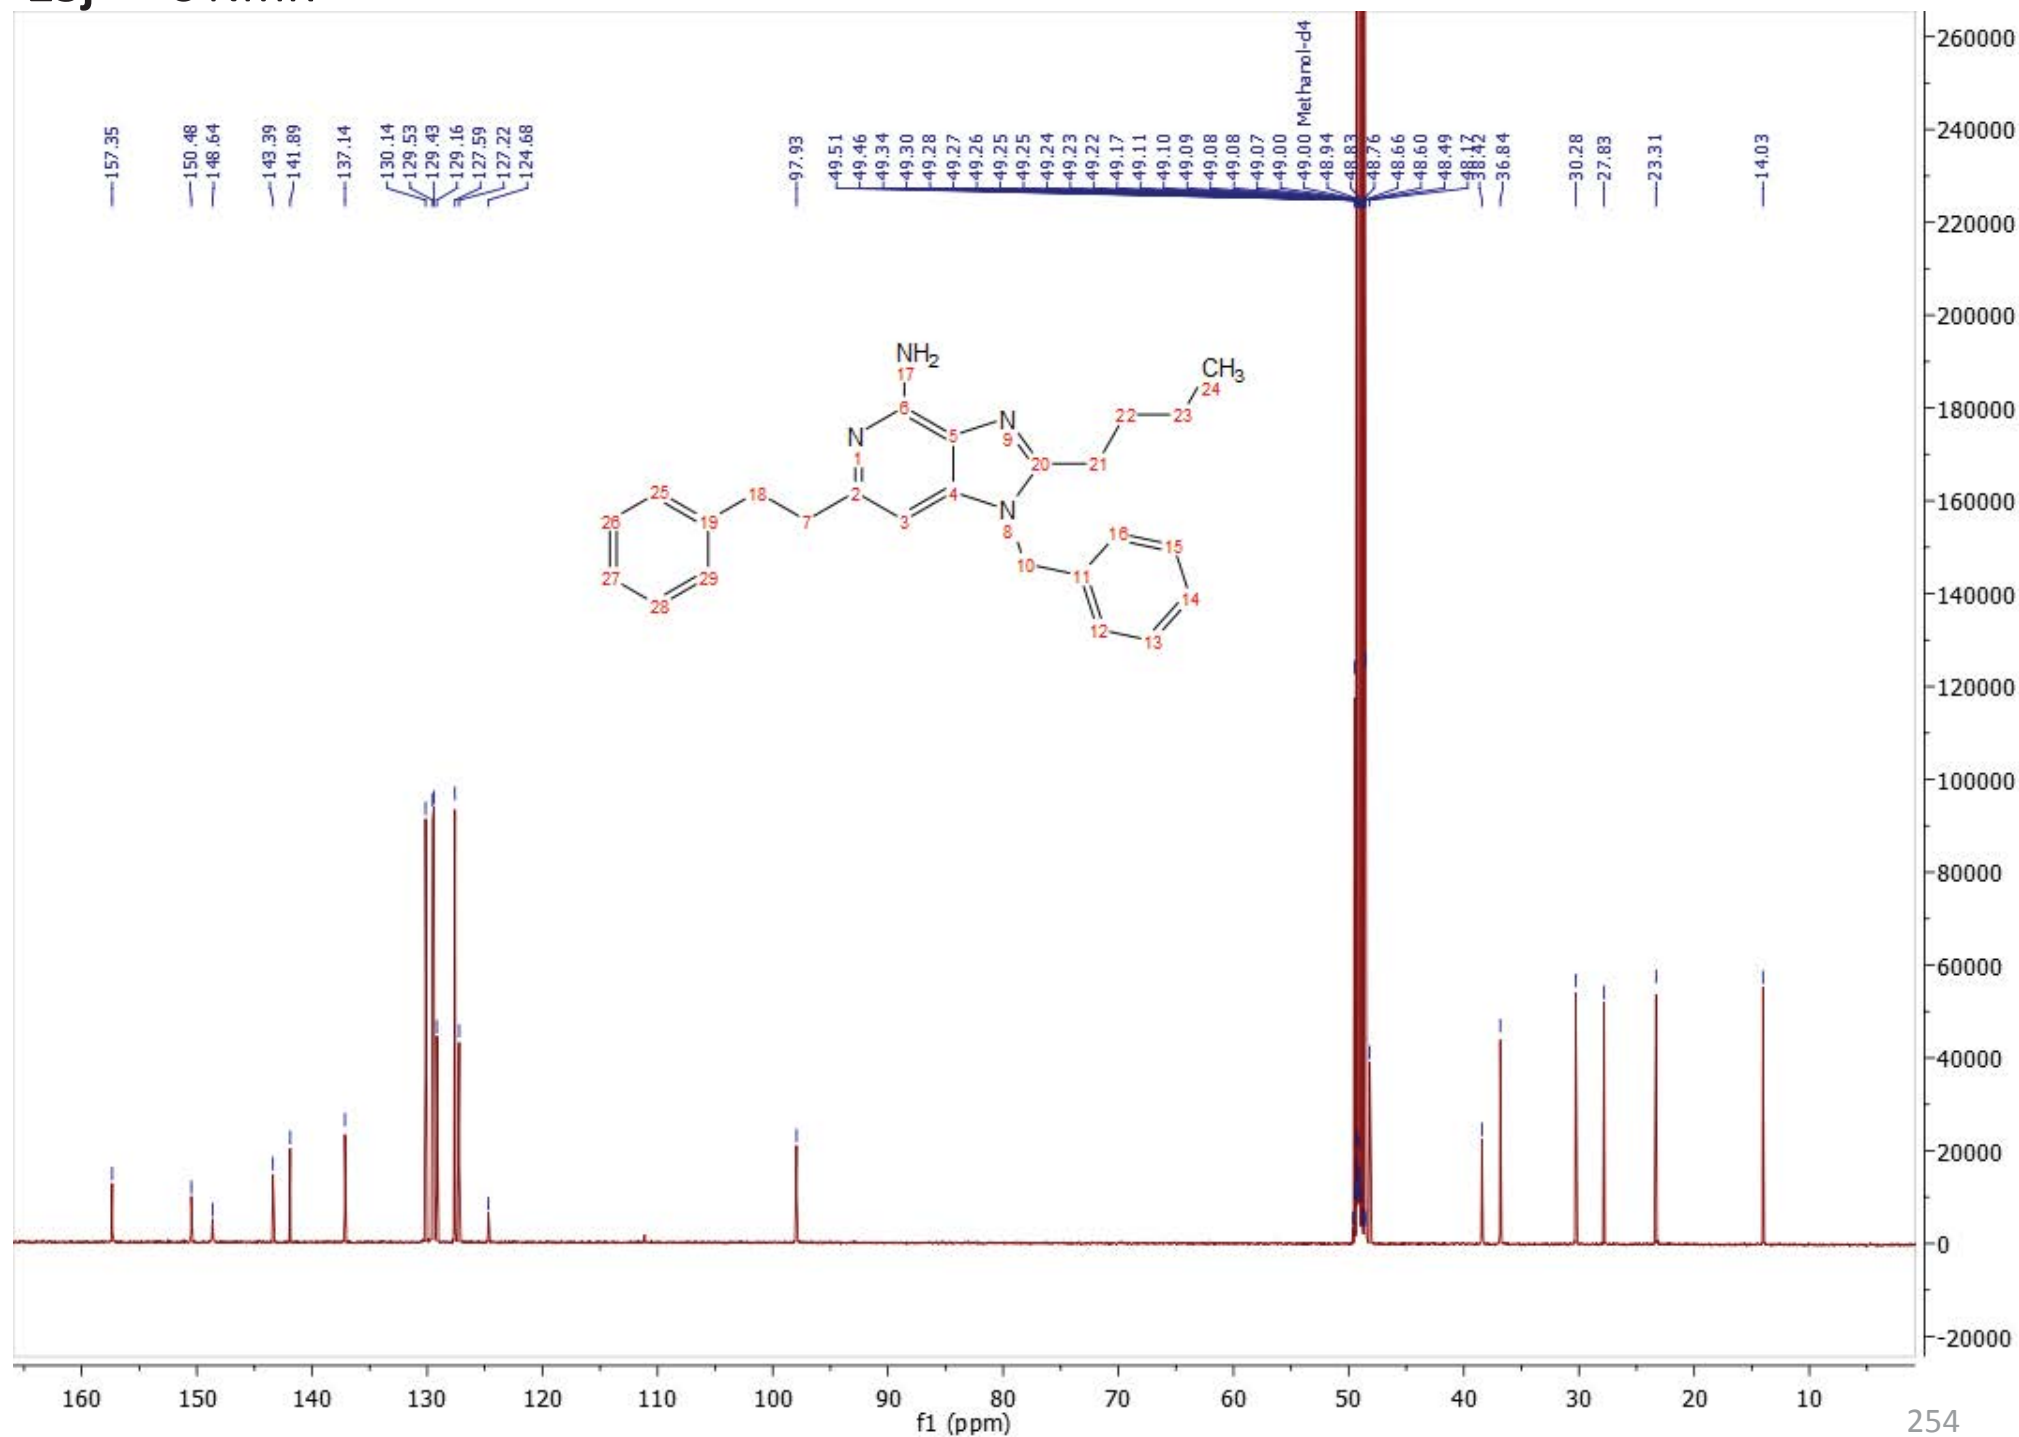

23j MS

|               |                      |             |                      |                 |              |                        |                     |
|---------------|----------------------|-------------|----------------------|-----------------|--------------|------------------------|---------------------|
| Sample Name   | 06.06.12 EY-2-80 tub | Position    | Vial 1               | Instrument Name | Instrument 1 | User Name              |                     |
| Inj Vol       | -1                   | InjPosition |                      | SampleType      | Sample       | IRM Calibration Status | Success             |
| Data Filename | 06.06.12 EY-2-80 tub | ACQ Method  | Water-ACN Infusion M | Comment         |              | Acquired Time          | 6/6/2012 6:20:35 PM |

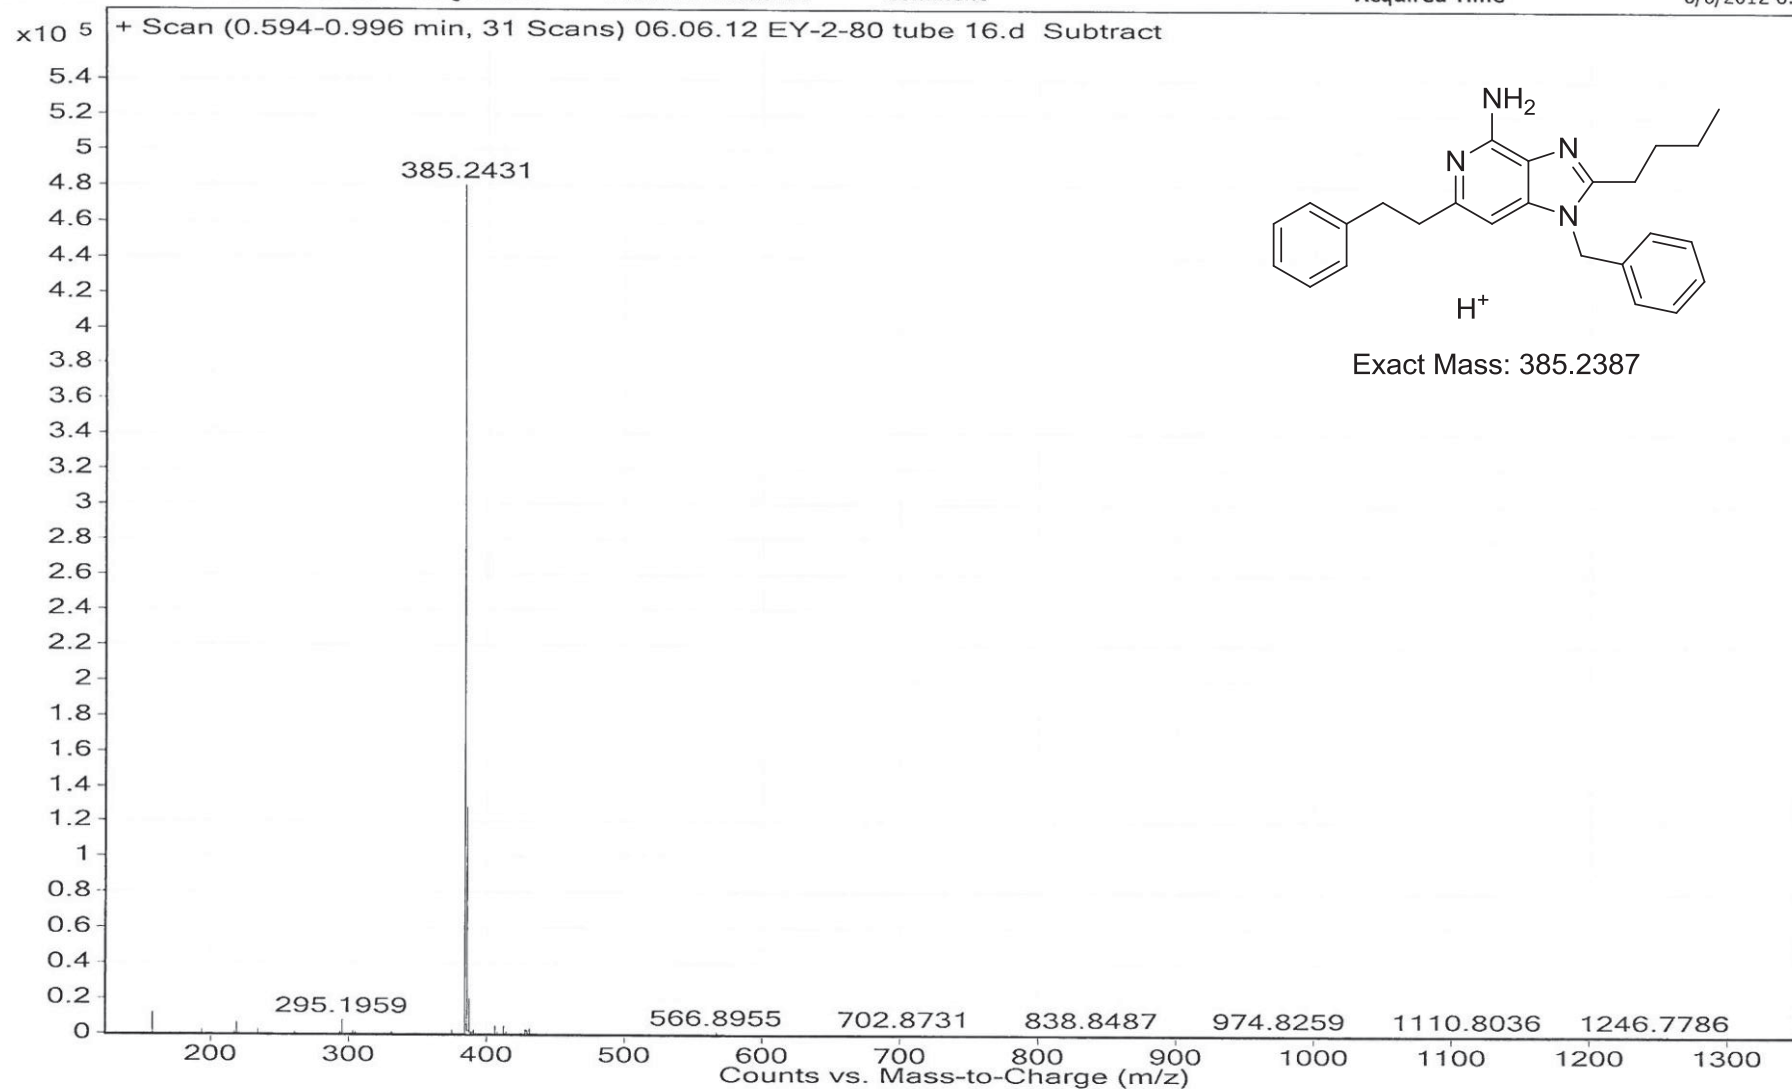

## 23j LC-MS

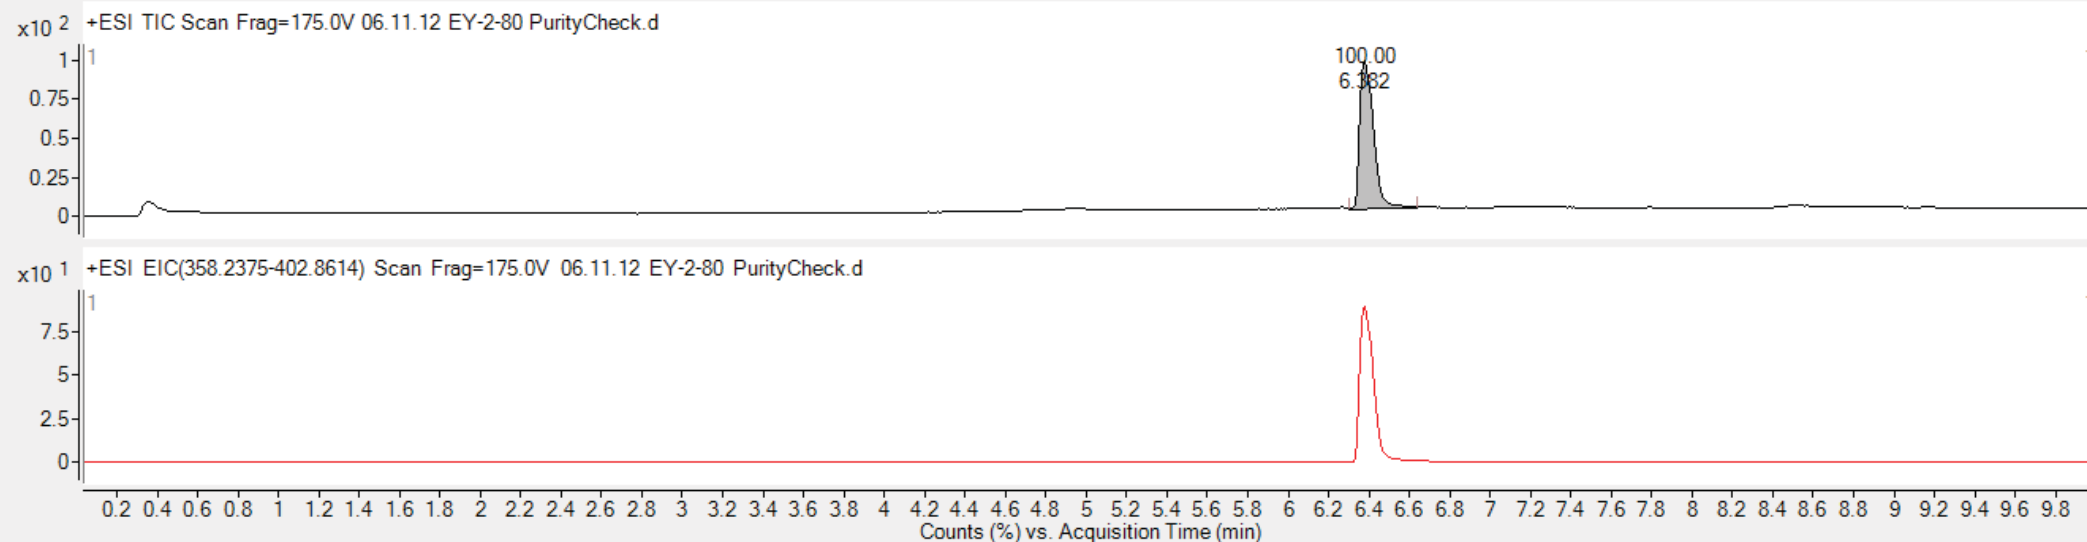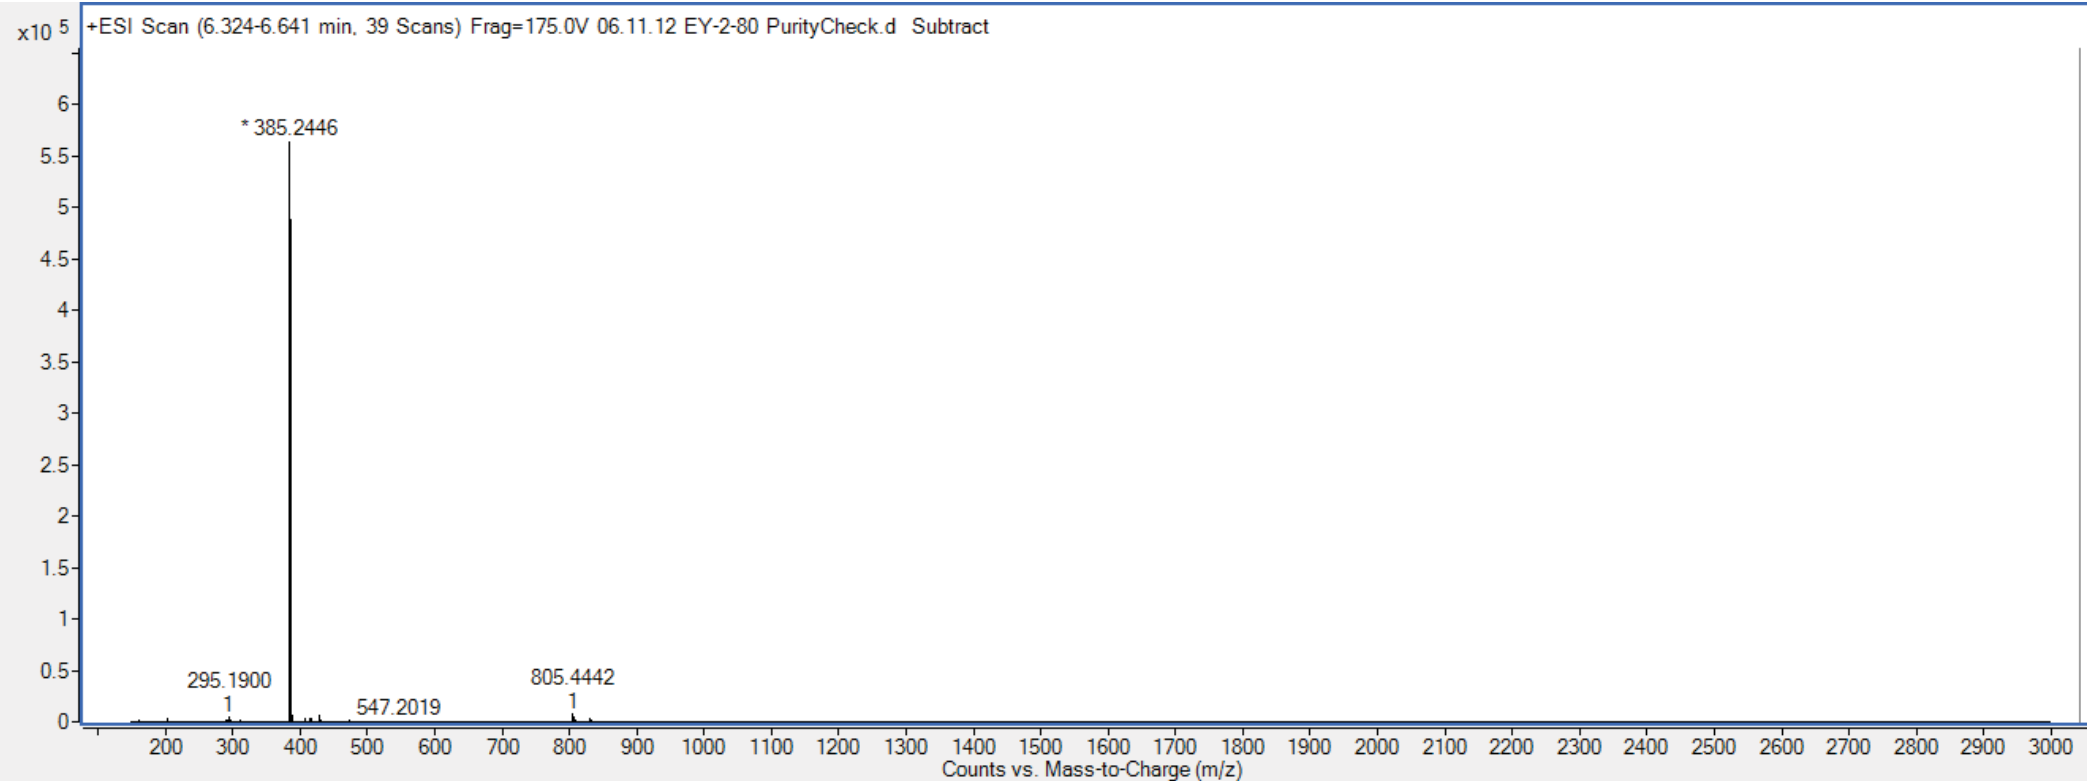

# 24 <sup>1</sup>H NMR

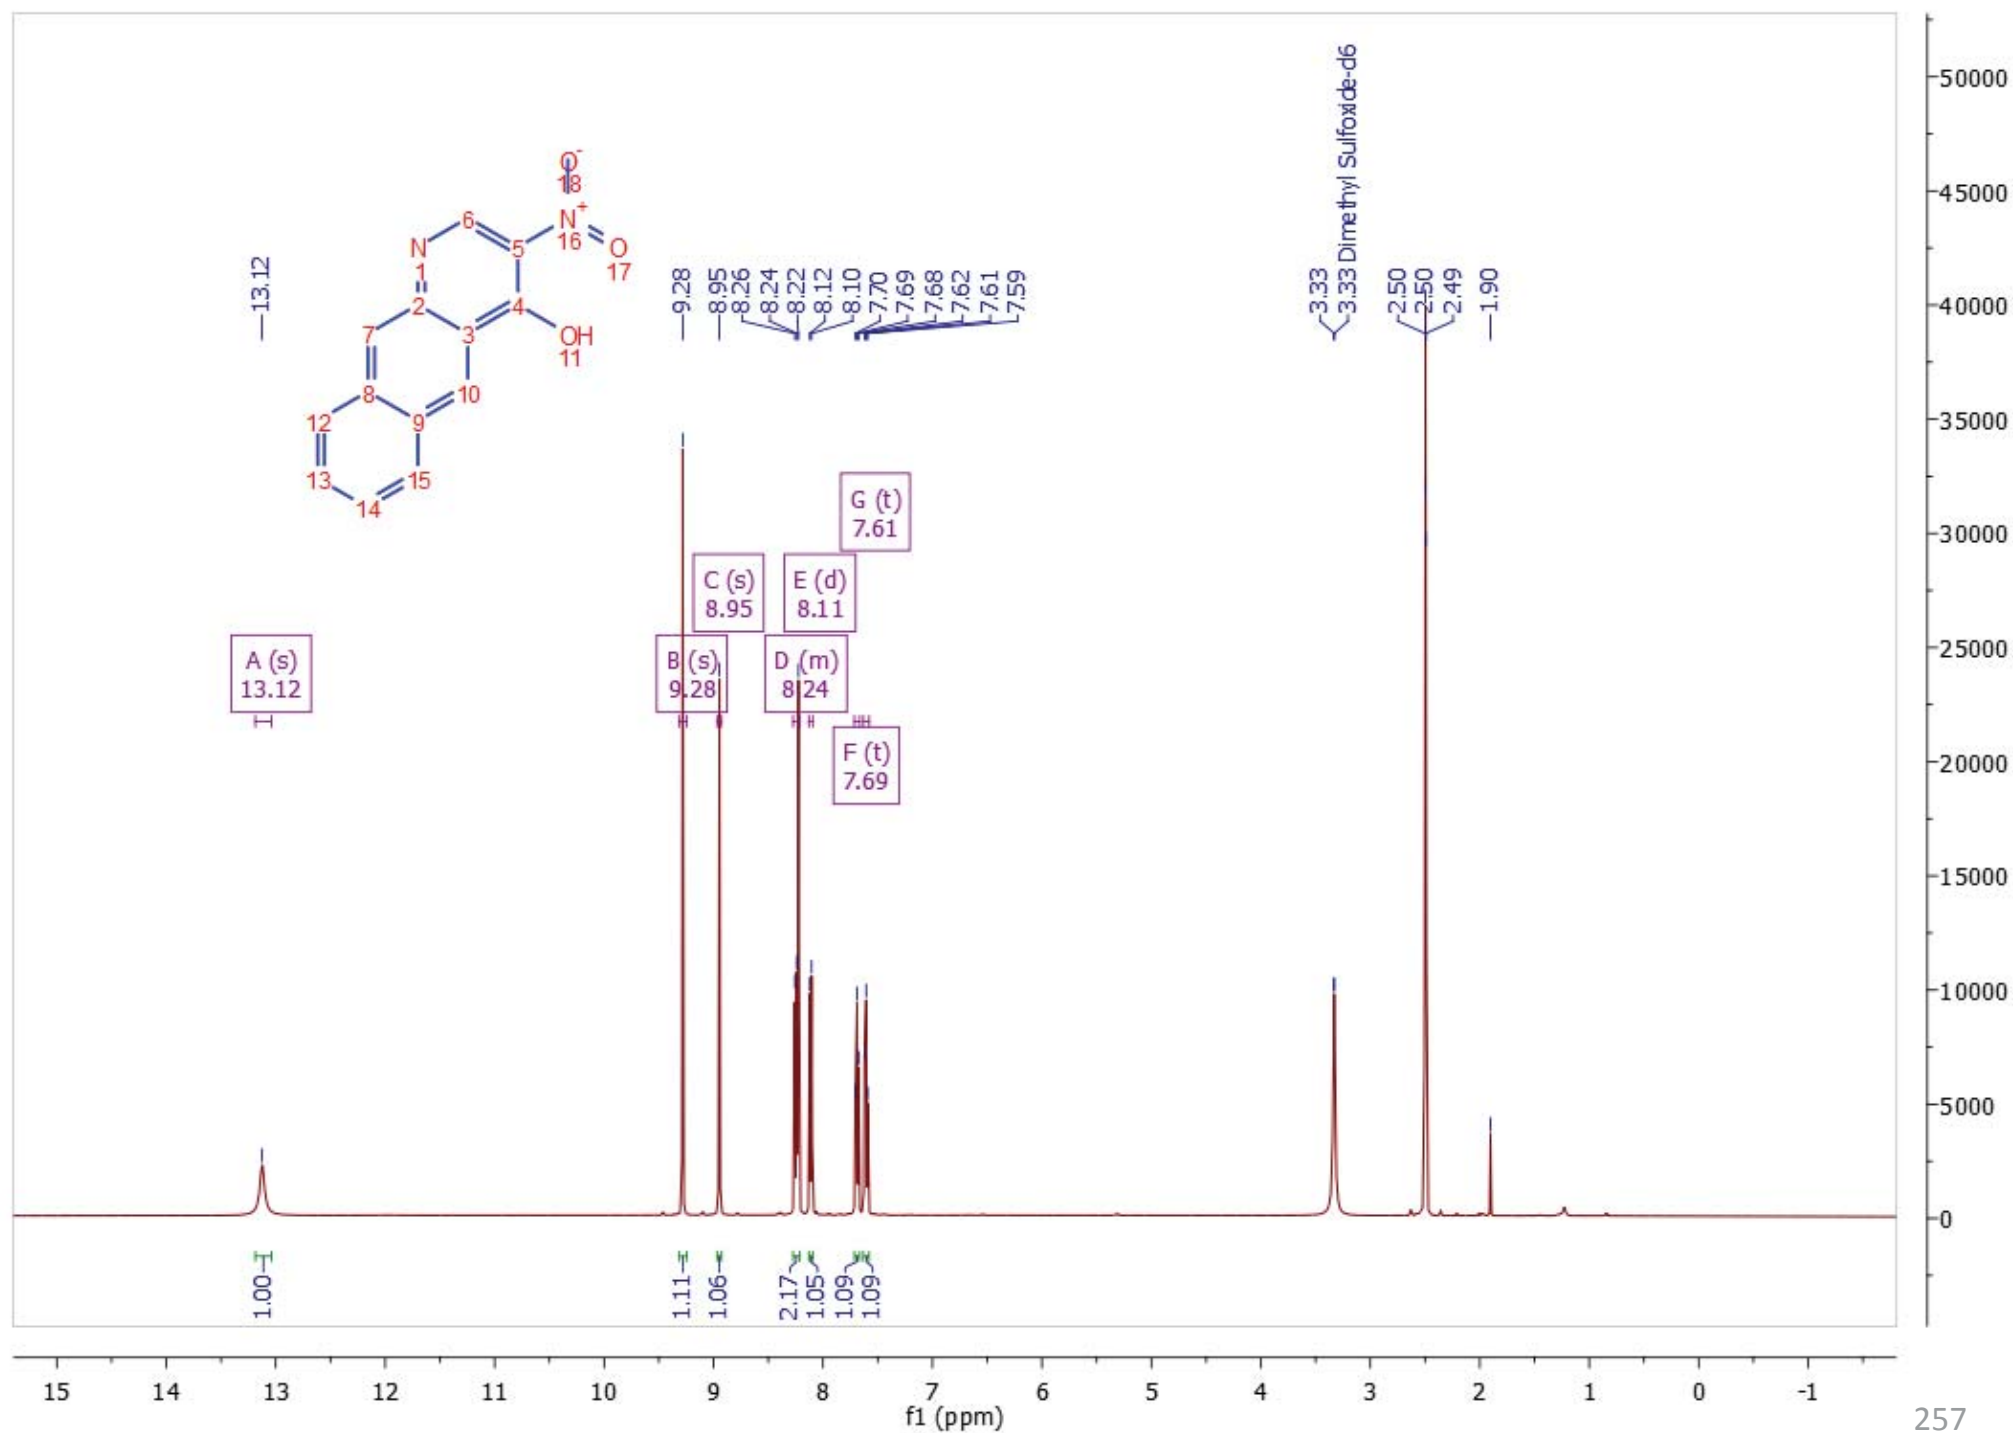



## <sup>24</sup> <sup>13</sup>C NMR

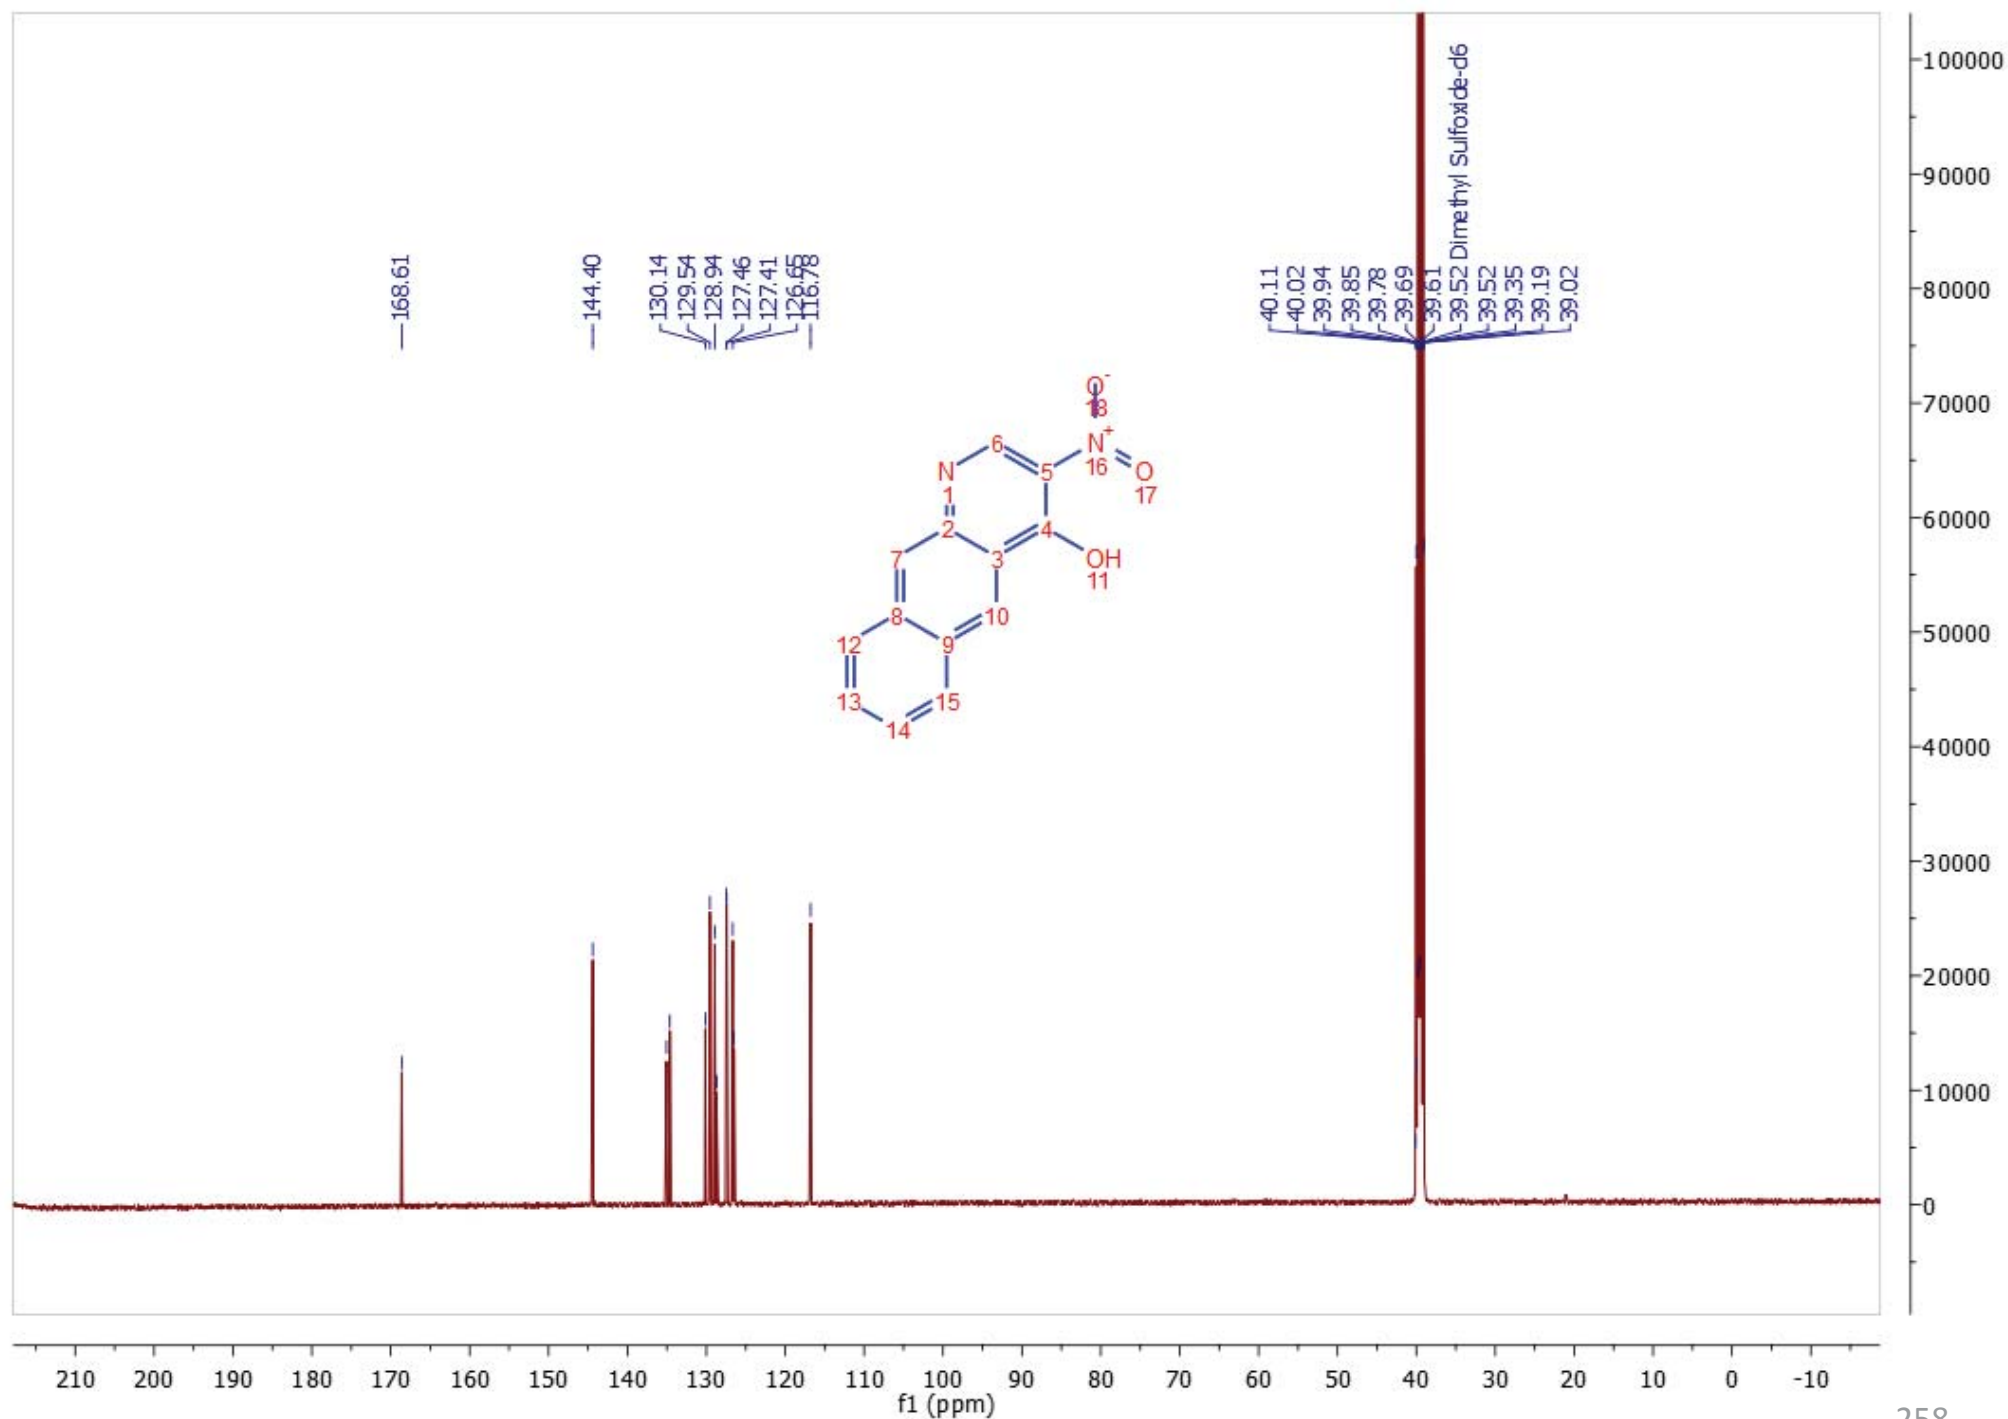

# 25 <sup>1</sup>H NMR

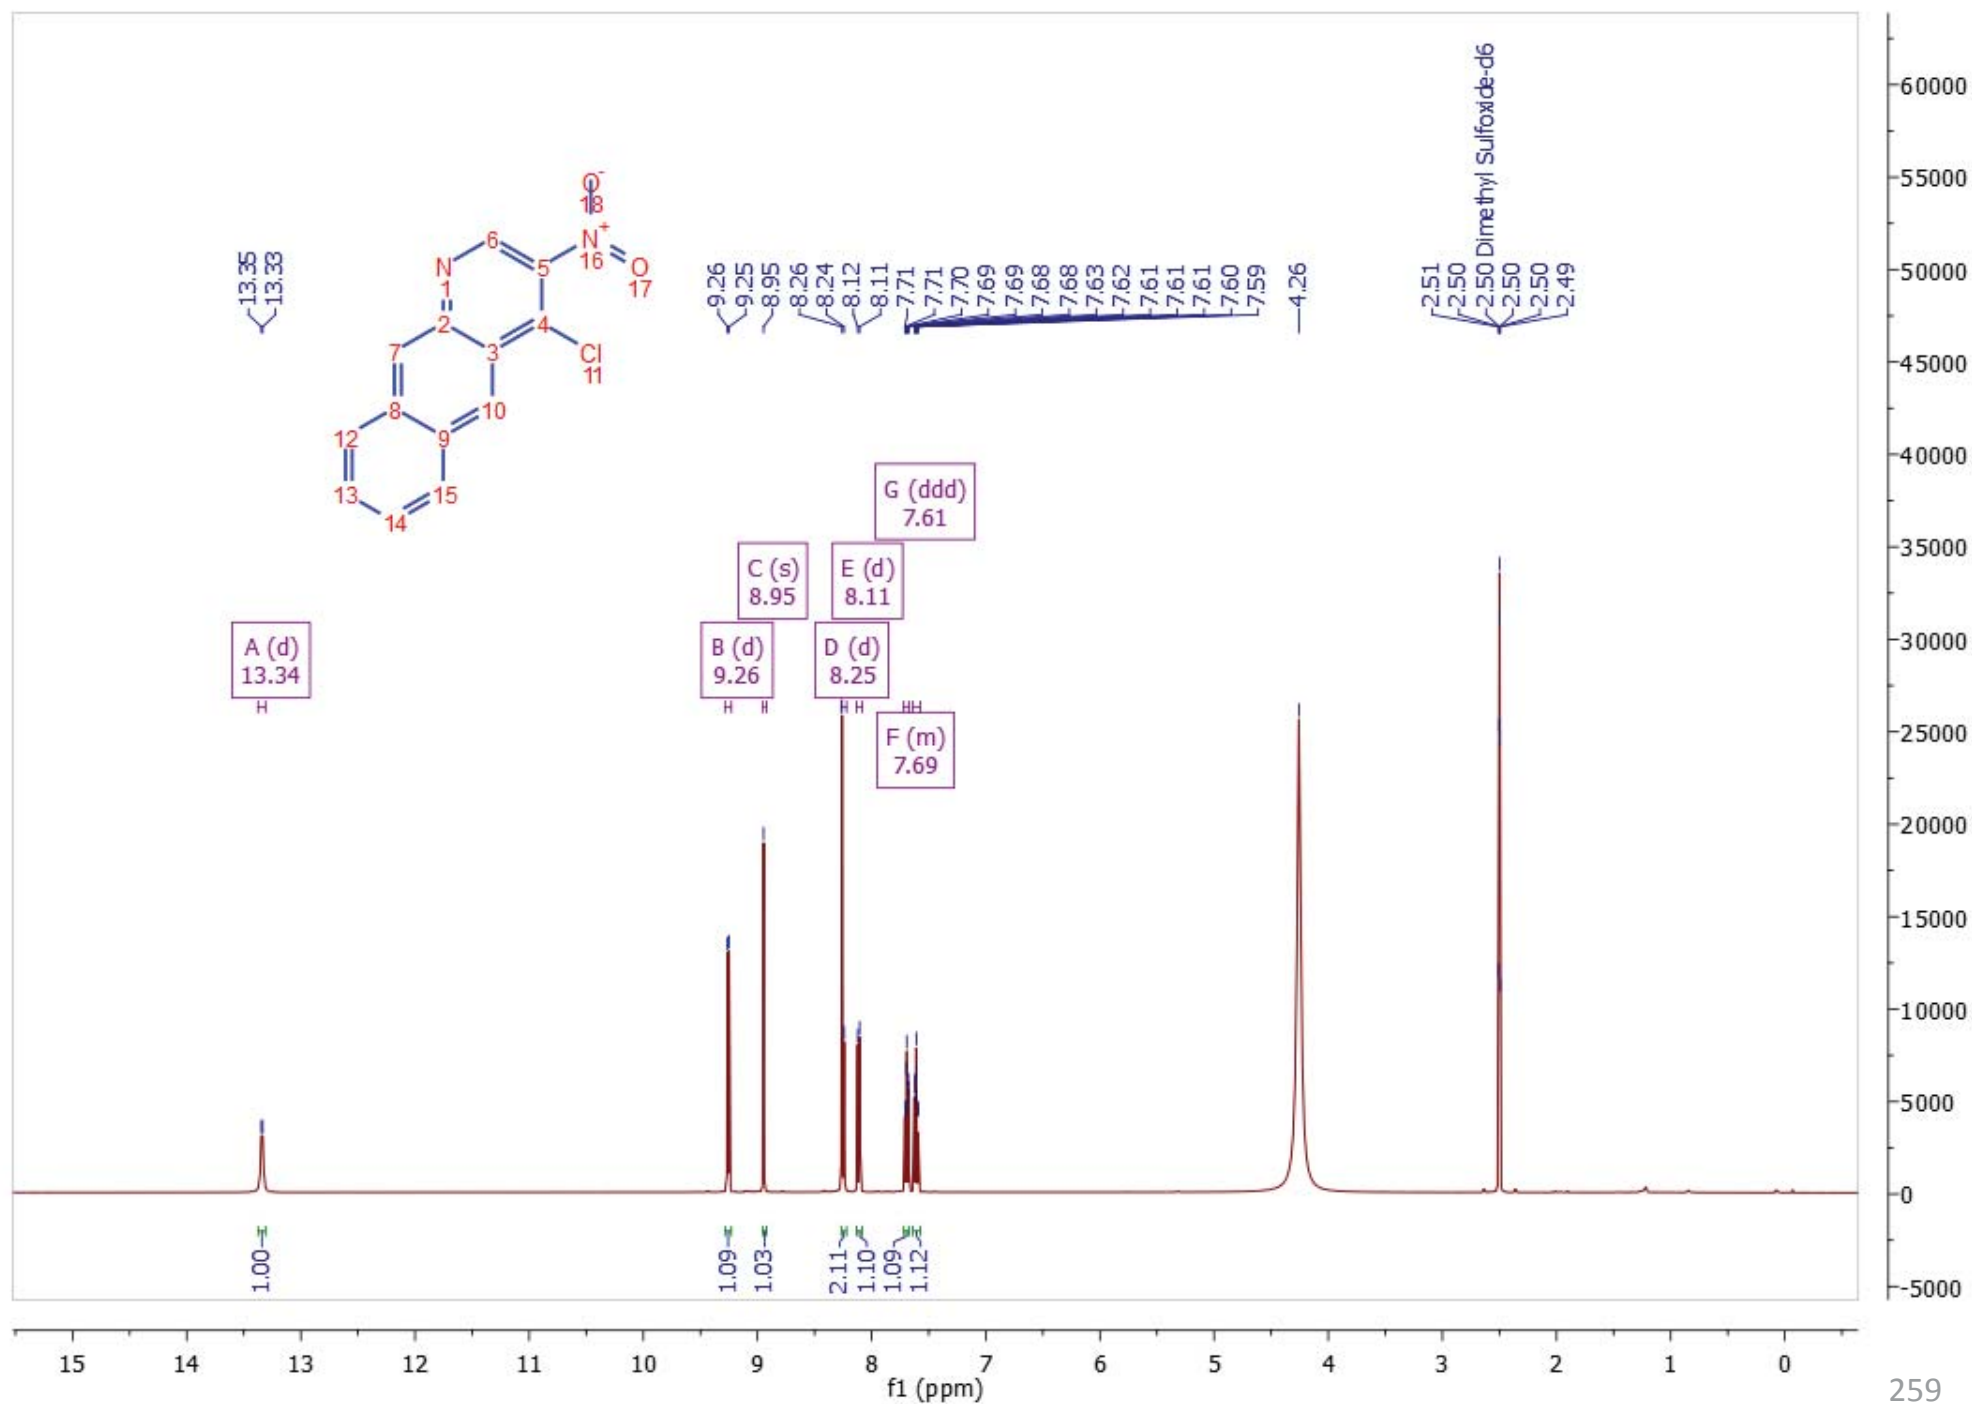

# <sup>25</sup> <sup>13</sup>C NMR

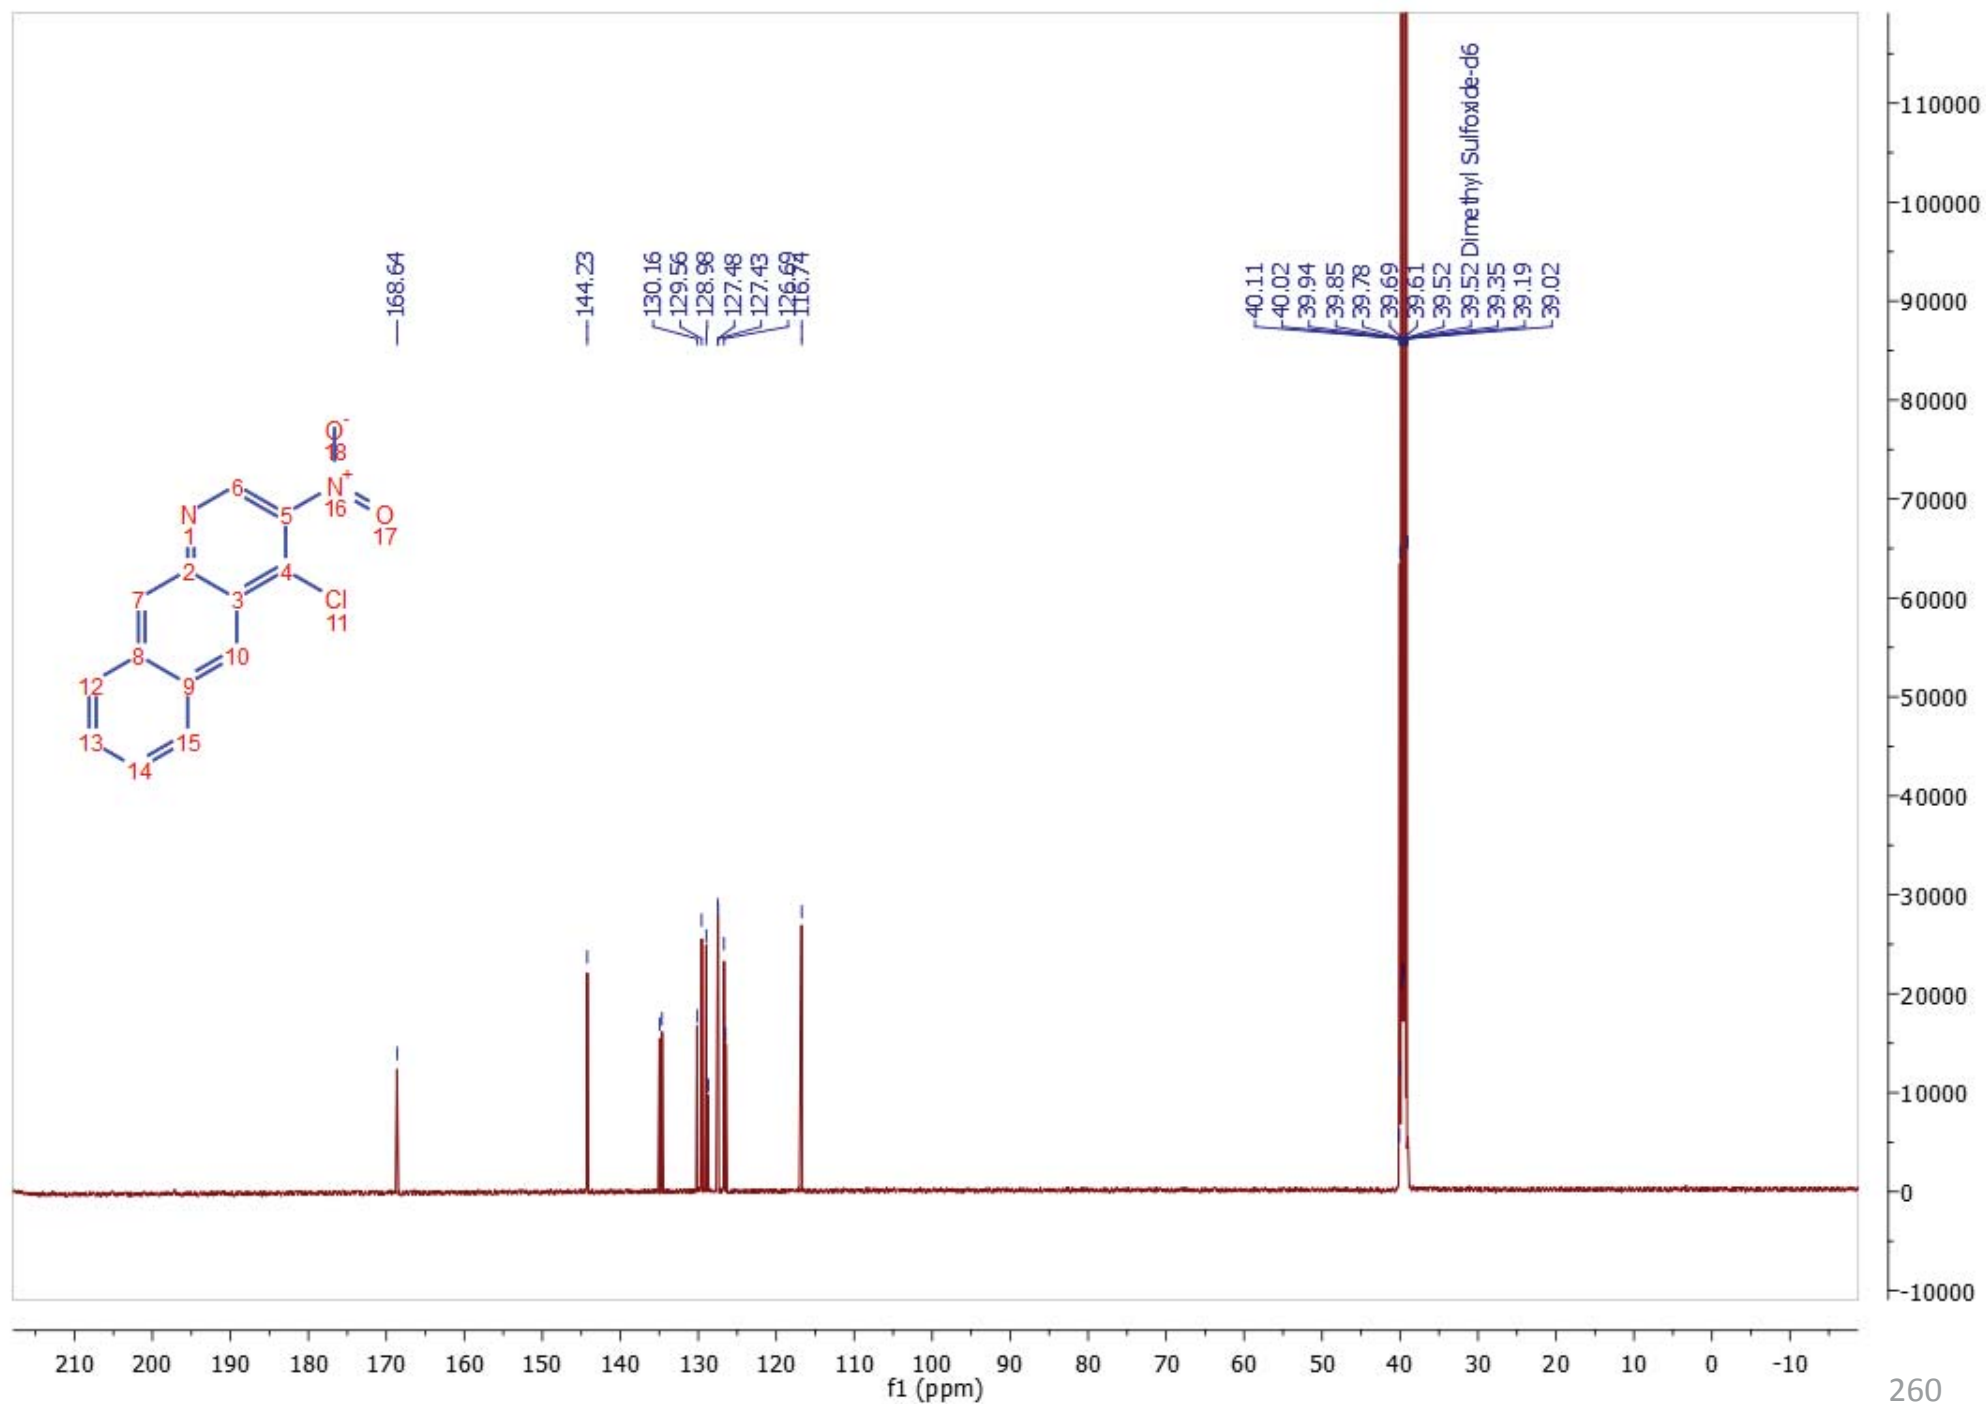

# 26 <sup>1</sup>H NMR

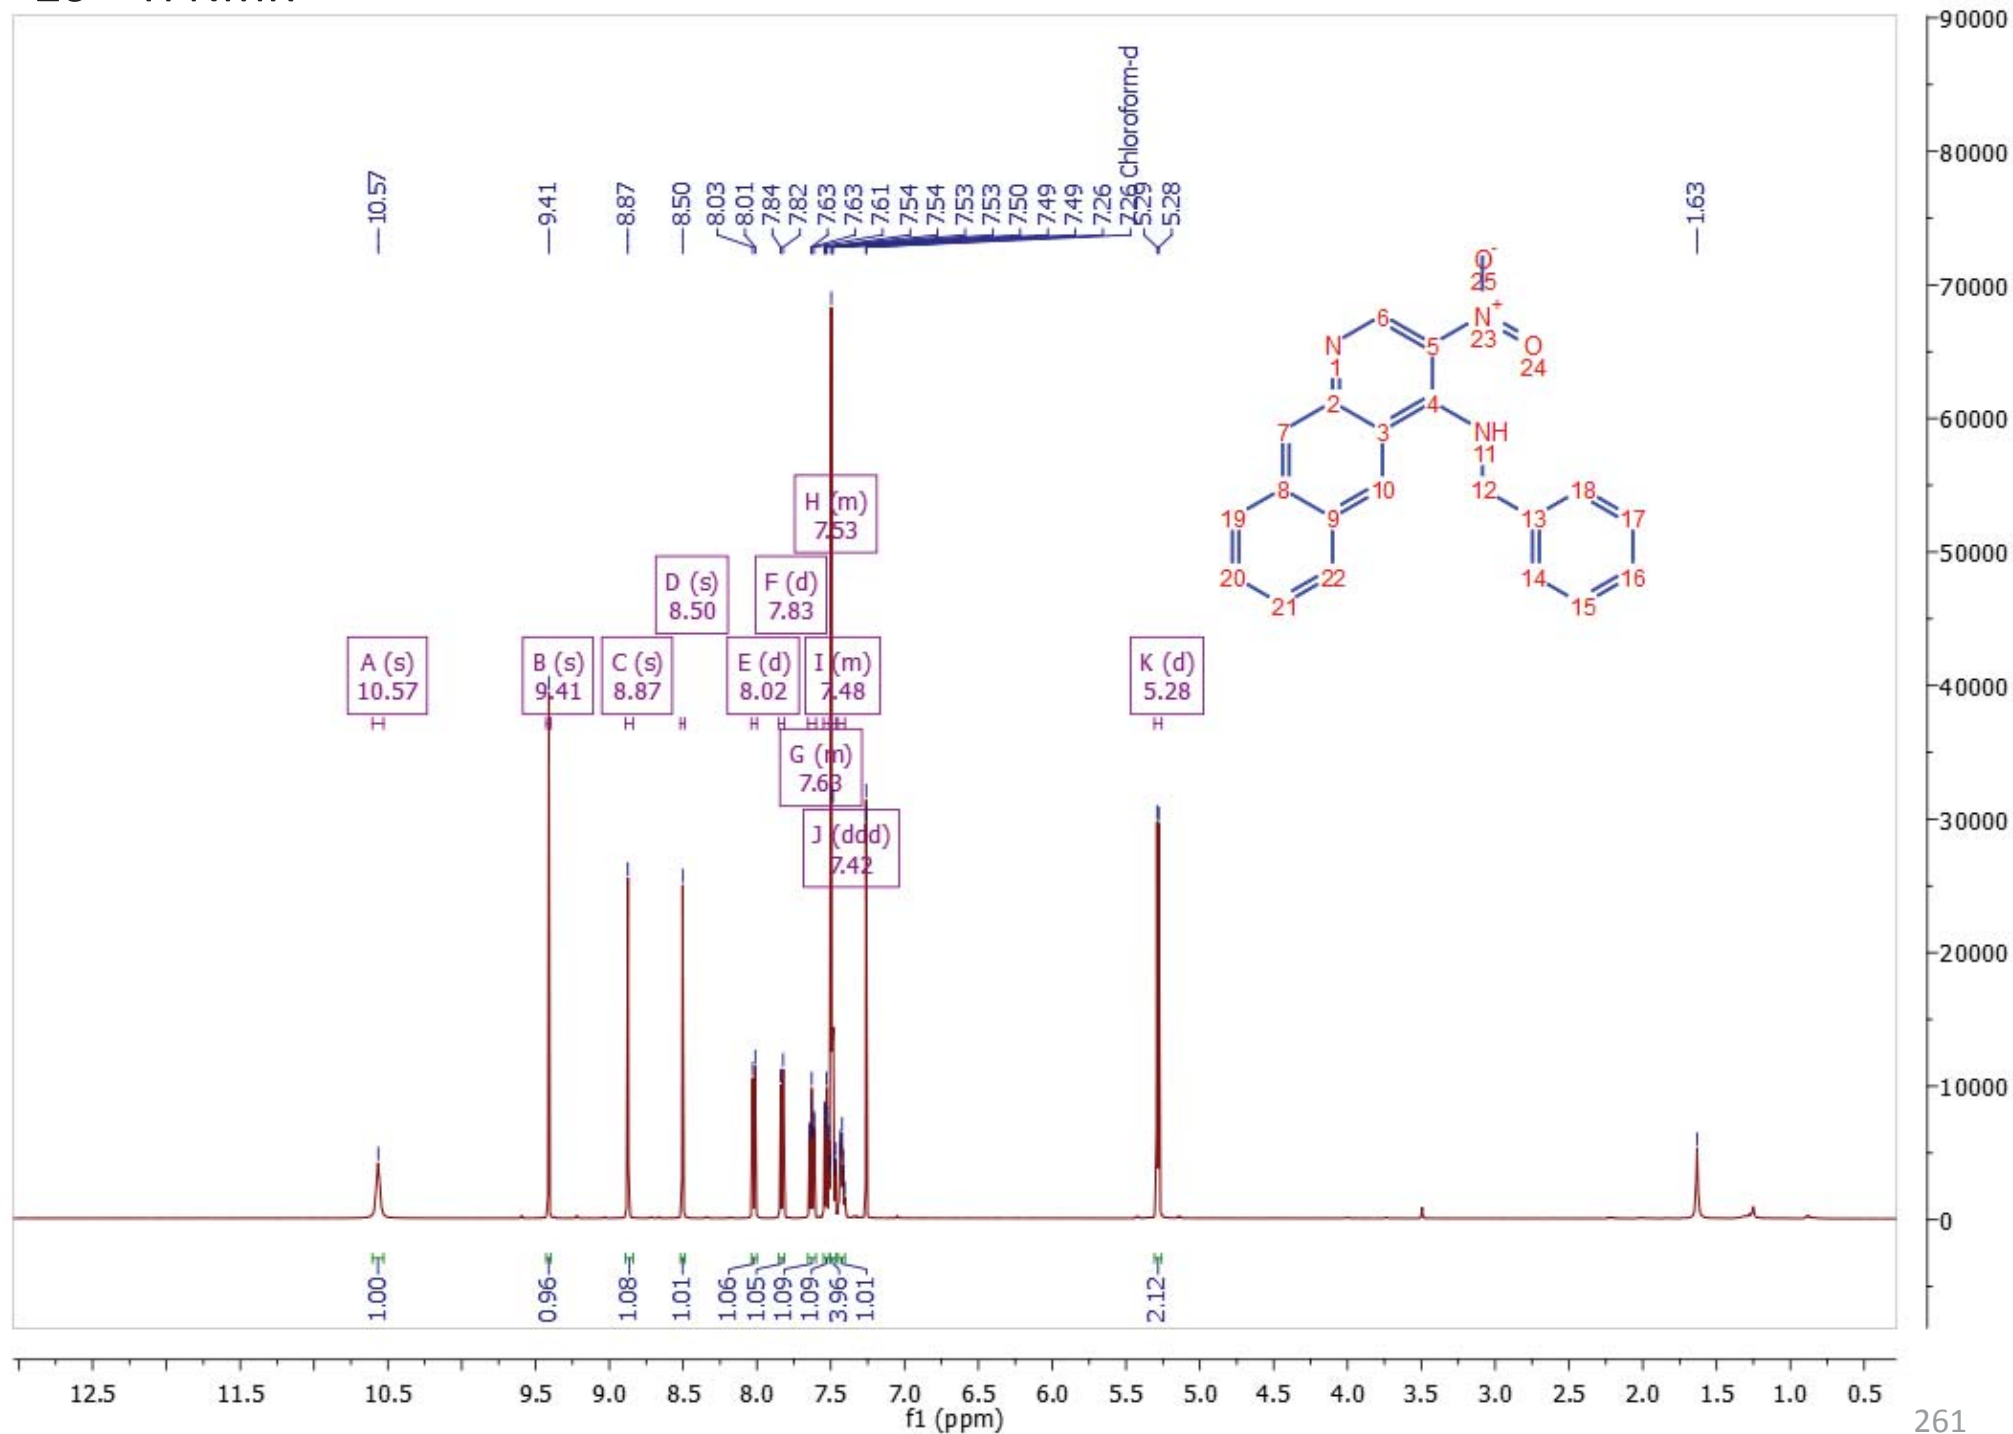

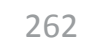

26 MS

|               |                     |             |                      |                 |              |                        |                       |
|---------------|---------------------|-------------|----------------------|-----------------|--------------|------------------------|-----------------------|
| Sample Name   | 11.23.11 EY-1-148   | Position    | Vial 1               | Instrument Name | Instrument 1 | User Name              |                       |
| Inj Vol       | -1                  | InjPosition |                      | SampleType      | Sample       | IRM Calibration Status | Success               |
| Data Filename | 11.23.11 EY-1-148.d | ACQ Method  | Water-ACN Infusion M | Comment         |              | Acquired Time          | 11/23/2011 6:34:33 PM |

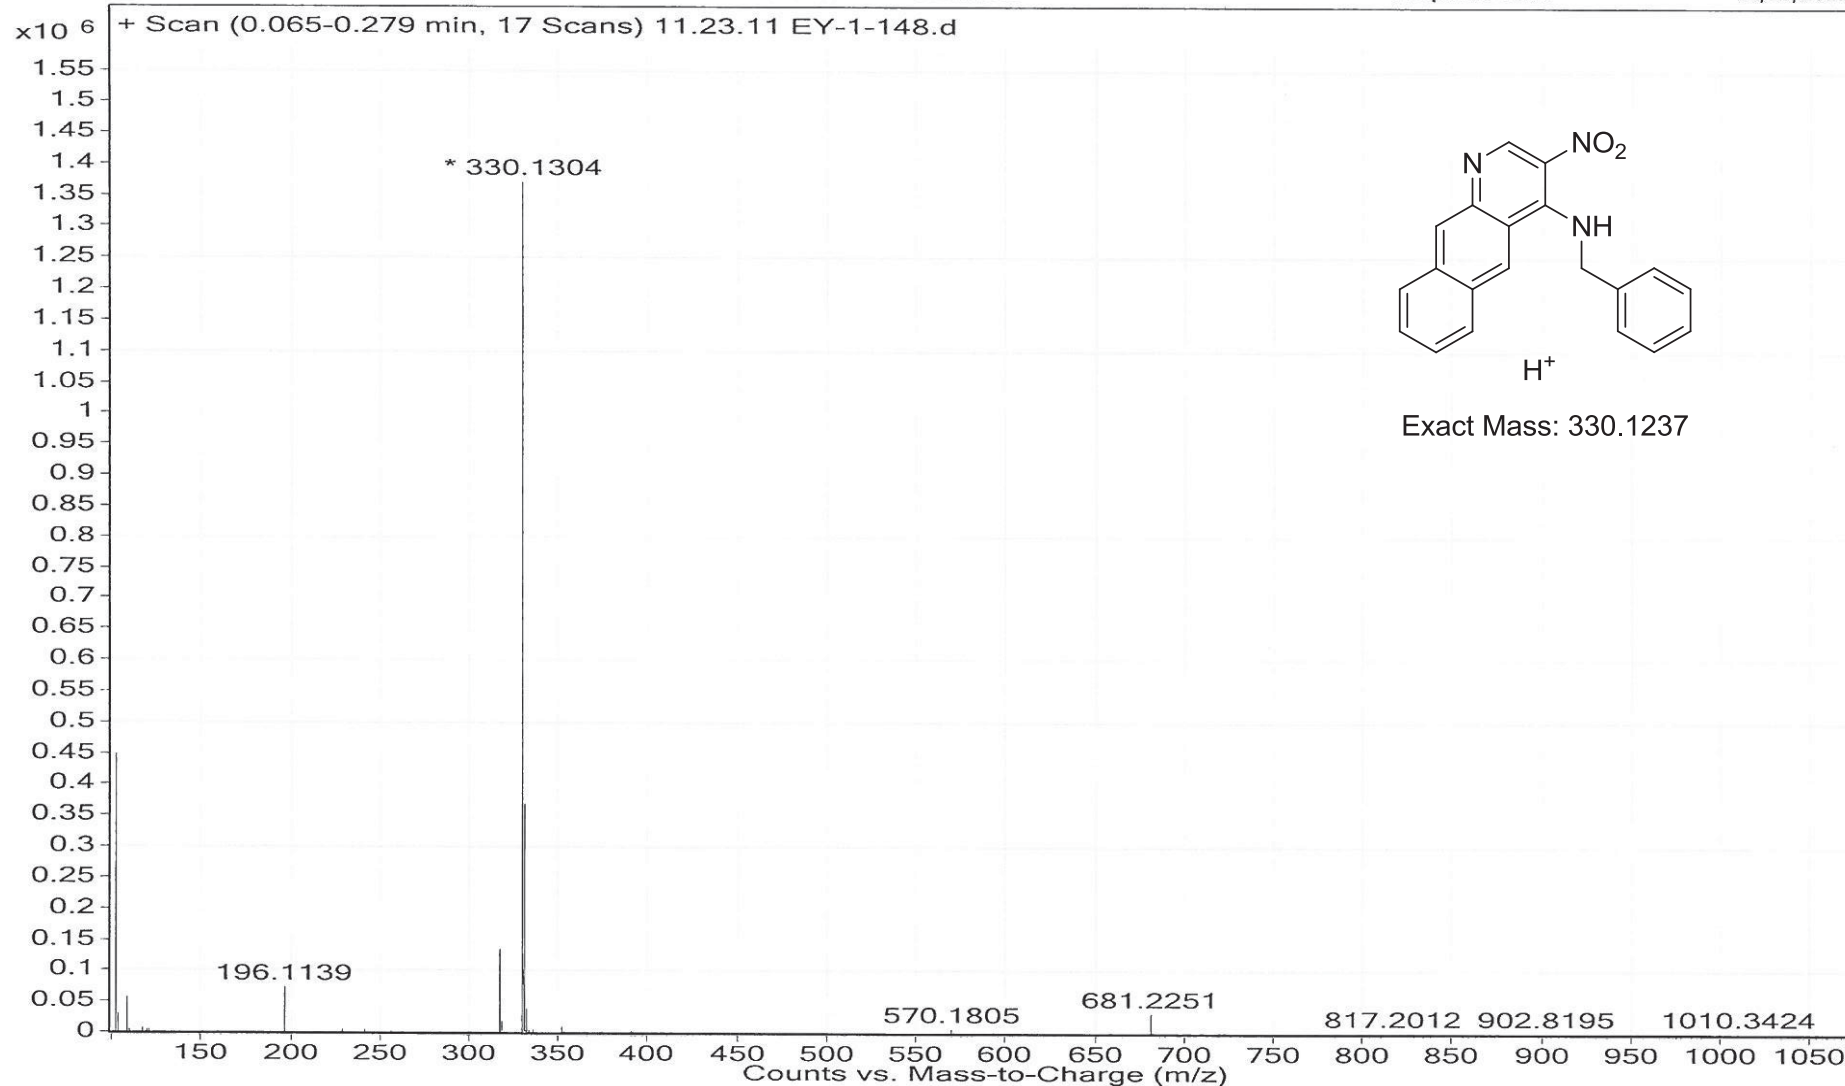

# 27 MS

|               |                      |             |                      |                 |              |                        |                       |
|---------------|----------------------|-------------|----------------------|-----------------|--------------|------------------------|-----------------------|
| Sample Name   | 12.13.11 EY-1-149 tu | Position    | Vial 1               | Instrument Name | Instrument 1 | User Name              |                       |
| Inj Vol       | 8                    | InjPosition |                      | SampleType      | Sample       | IRM Calibration Status | Success               |
| Data Filename | 12.13.11 EY-1-149 tu | ACQ Method  | Water-ACN Infusion M | Comment         |              | Acquired Time          | 12/13/2011 6:50:18 PM |

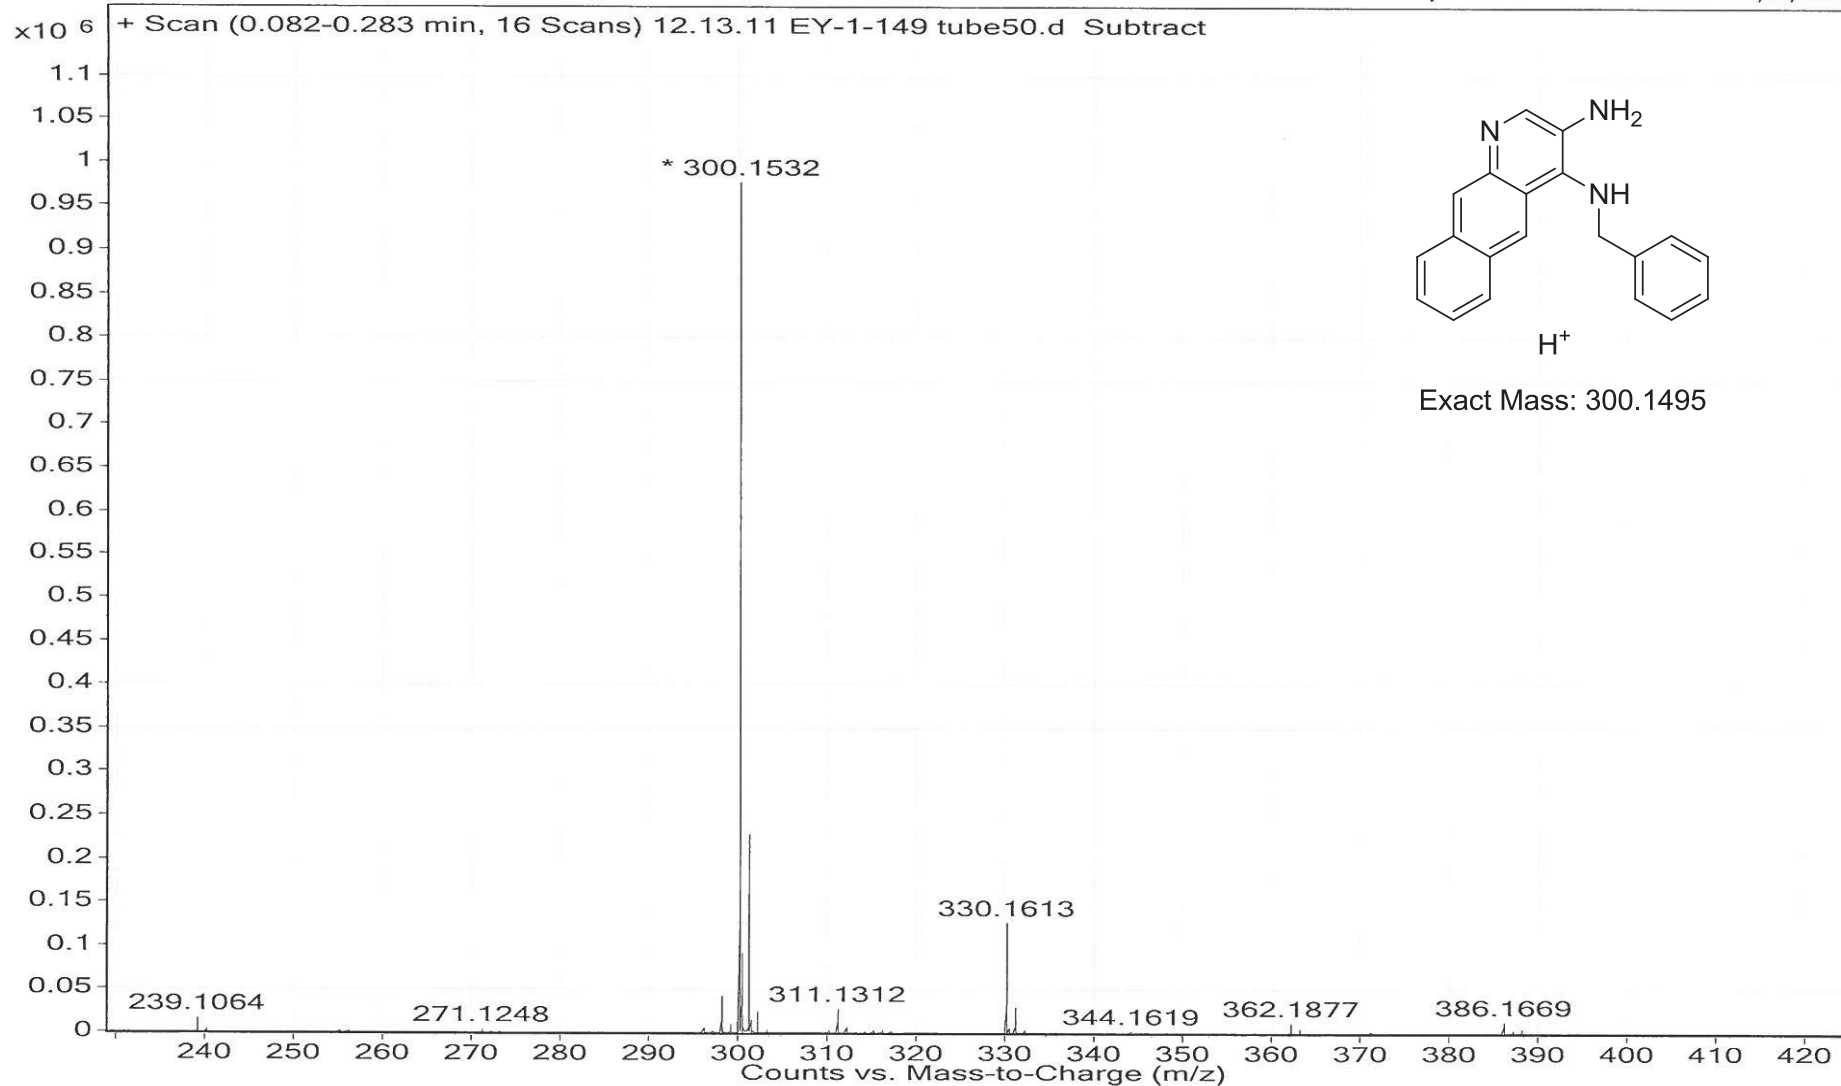



# 29 MS

|               |                      |             |                      |                 |              |                        |                    |
|---------------|----------------------|-------------|----------------------|-----------------|--------------|------------------------|--------------------|
| Sample Name   | 12.13.11 EY-1-161 Tu | Position    | Vial 1               | Instrument Name | Instrument 1 | User Name              |                    |
| Inj Vol       | 8                    | InjPosition |                      | SampleType      | Sample       | IRM Calibration Status | Success            |
| Data Filename | 12.13.11 EY-1-161 Tu | ACQ Method  | Water-ACN Infusion M | Comment         |              | Acquired Time          | 12/13/2011 3:29:15 |

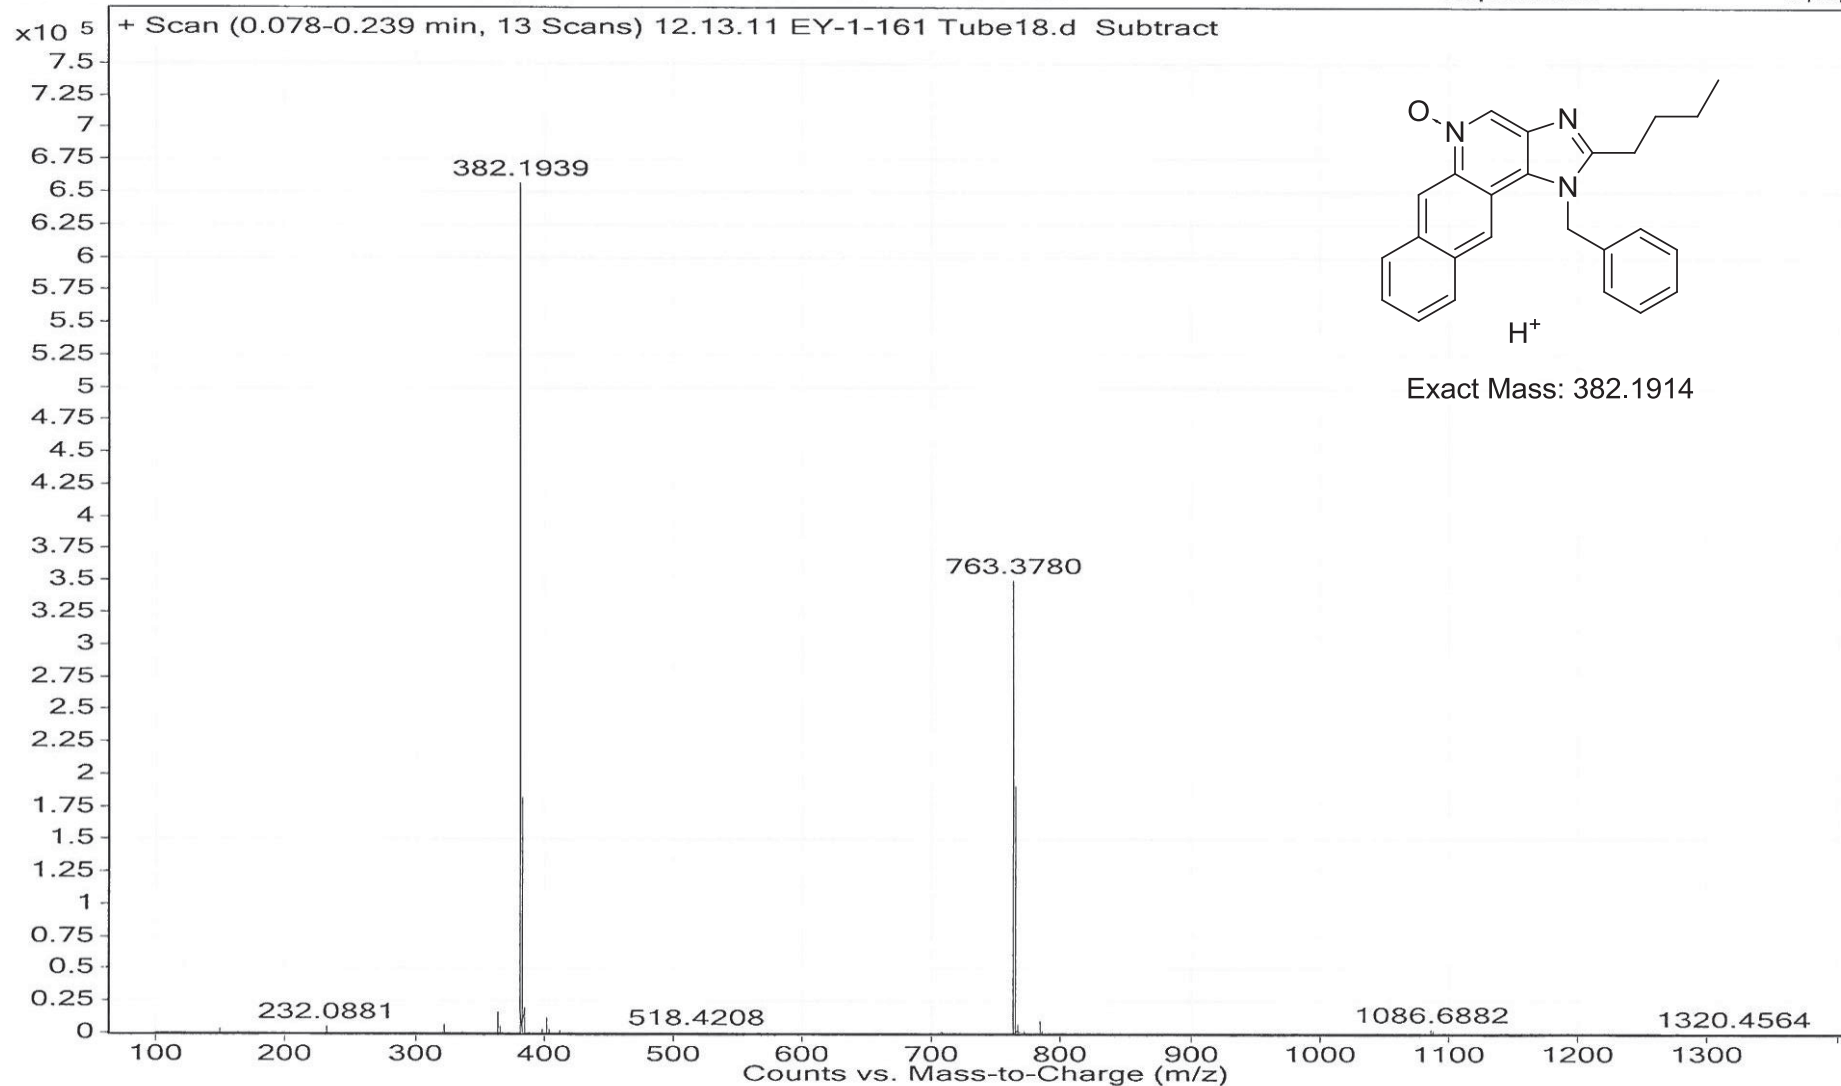

# 30 <sup>1</sup>H NMR

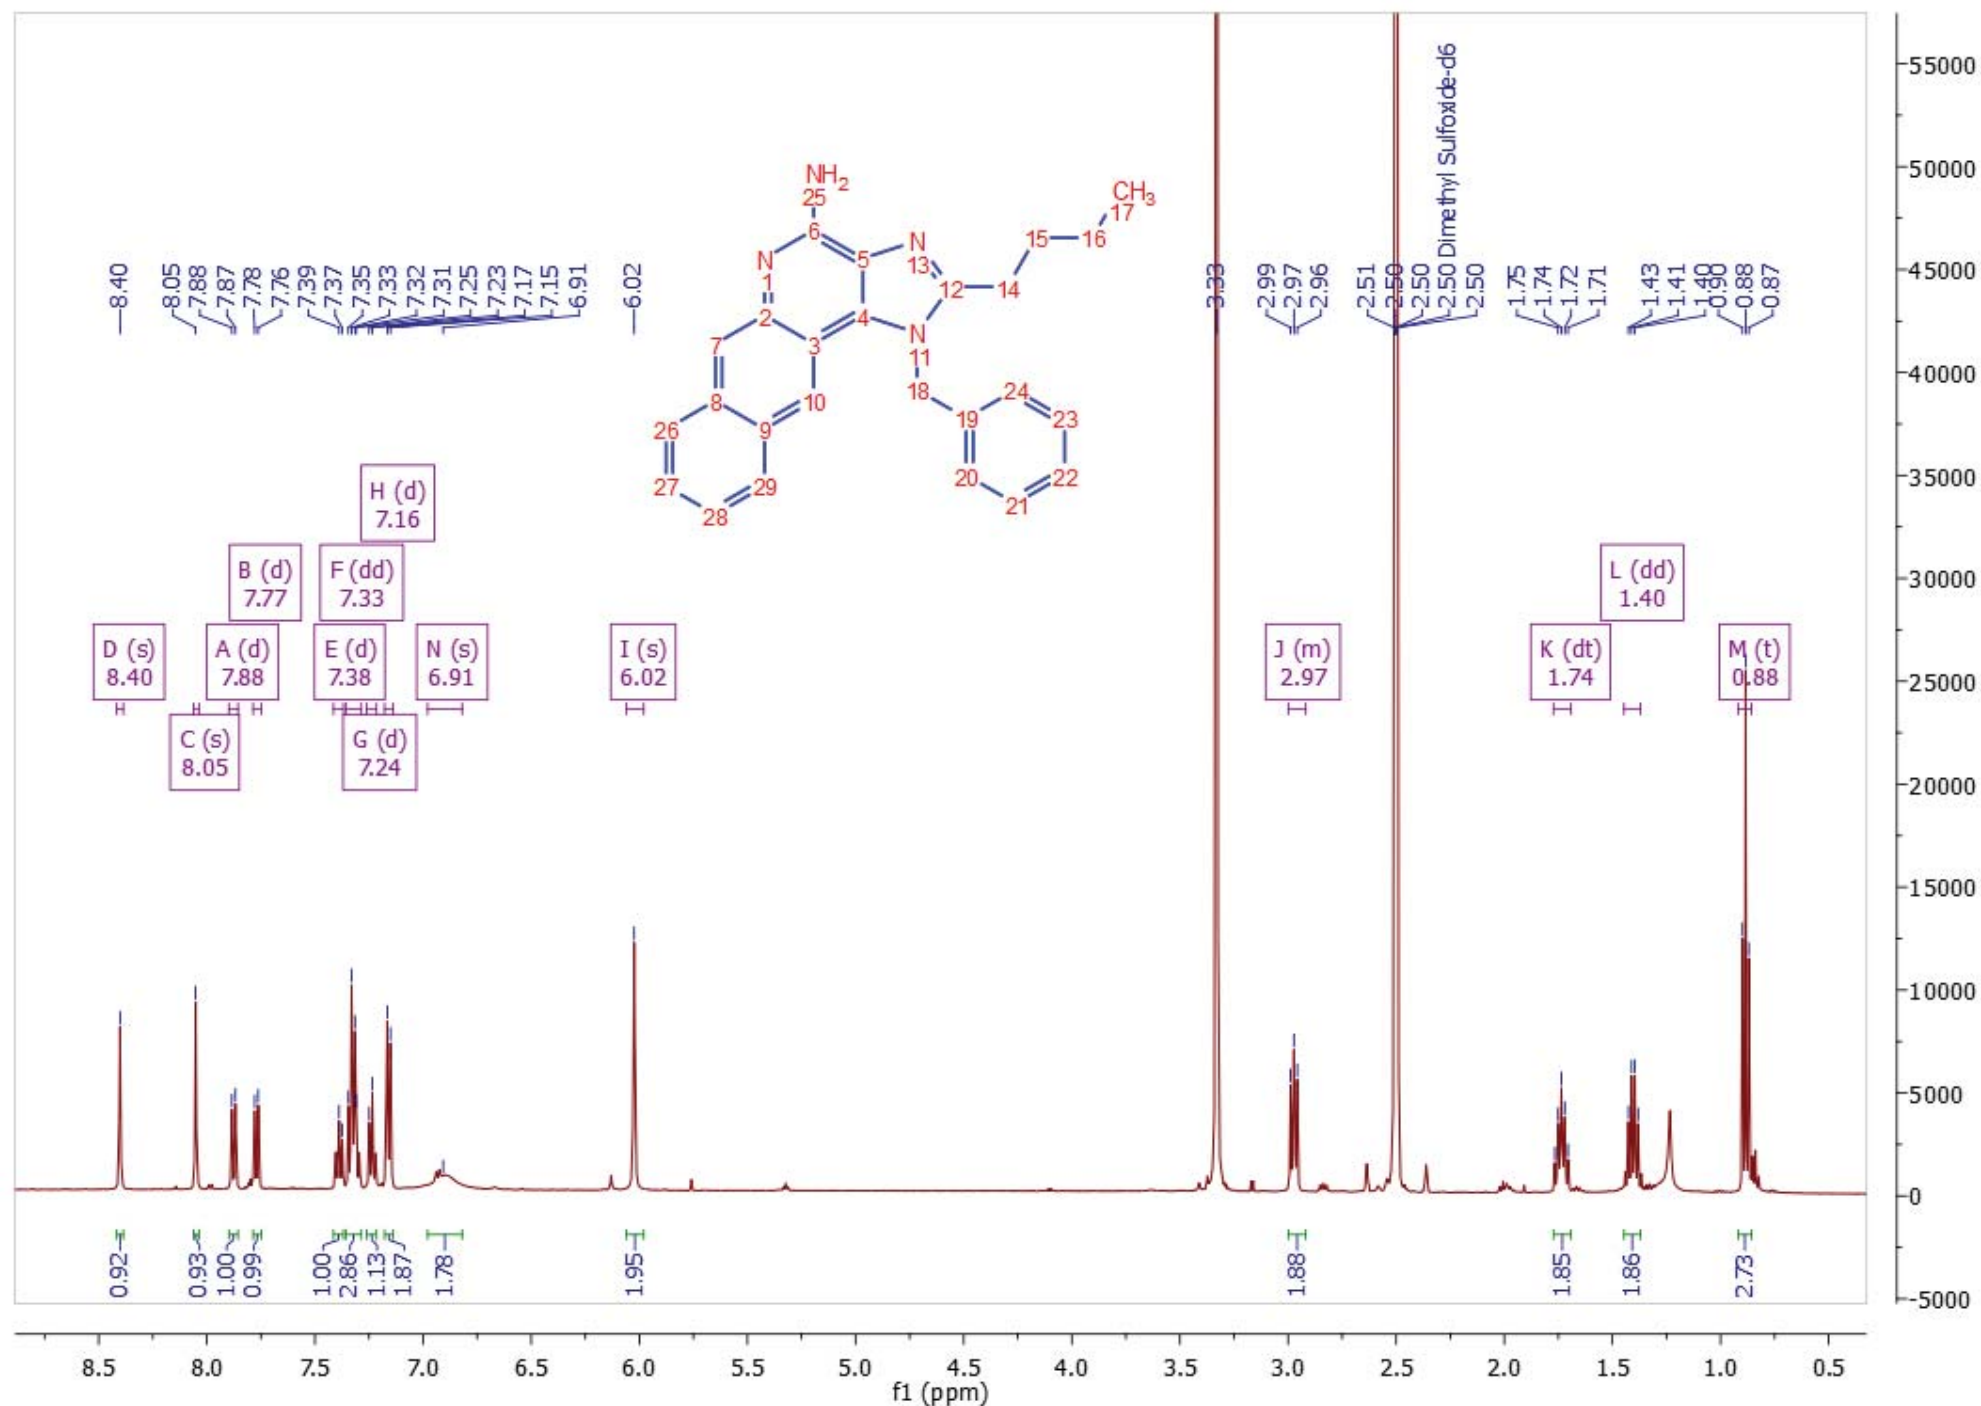

# 30 $^{13}\text{C}$ NMR

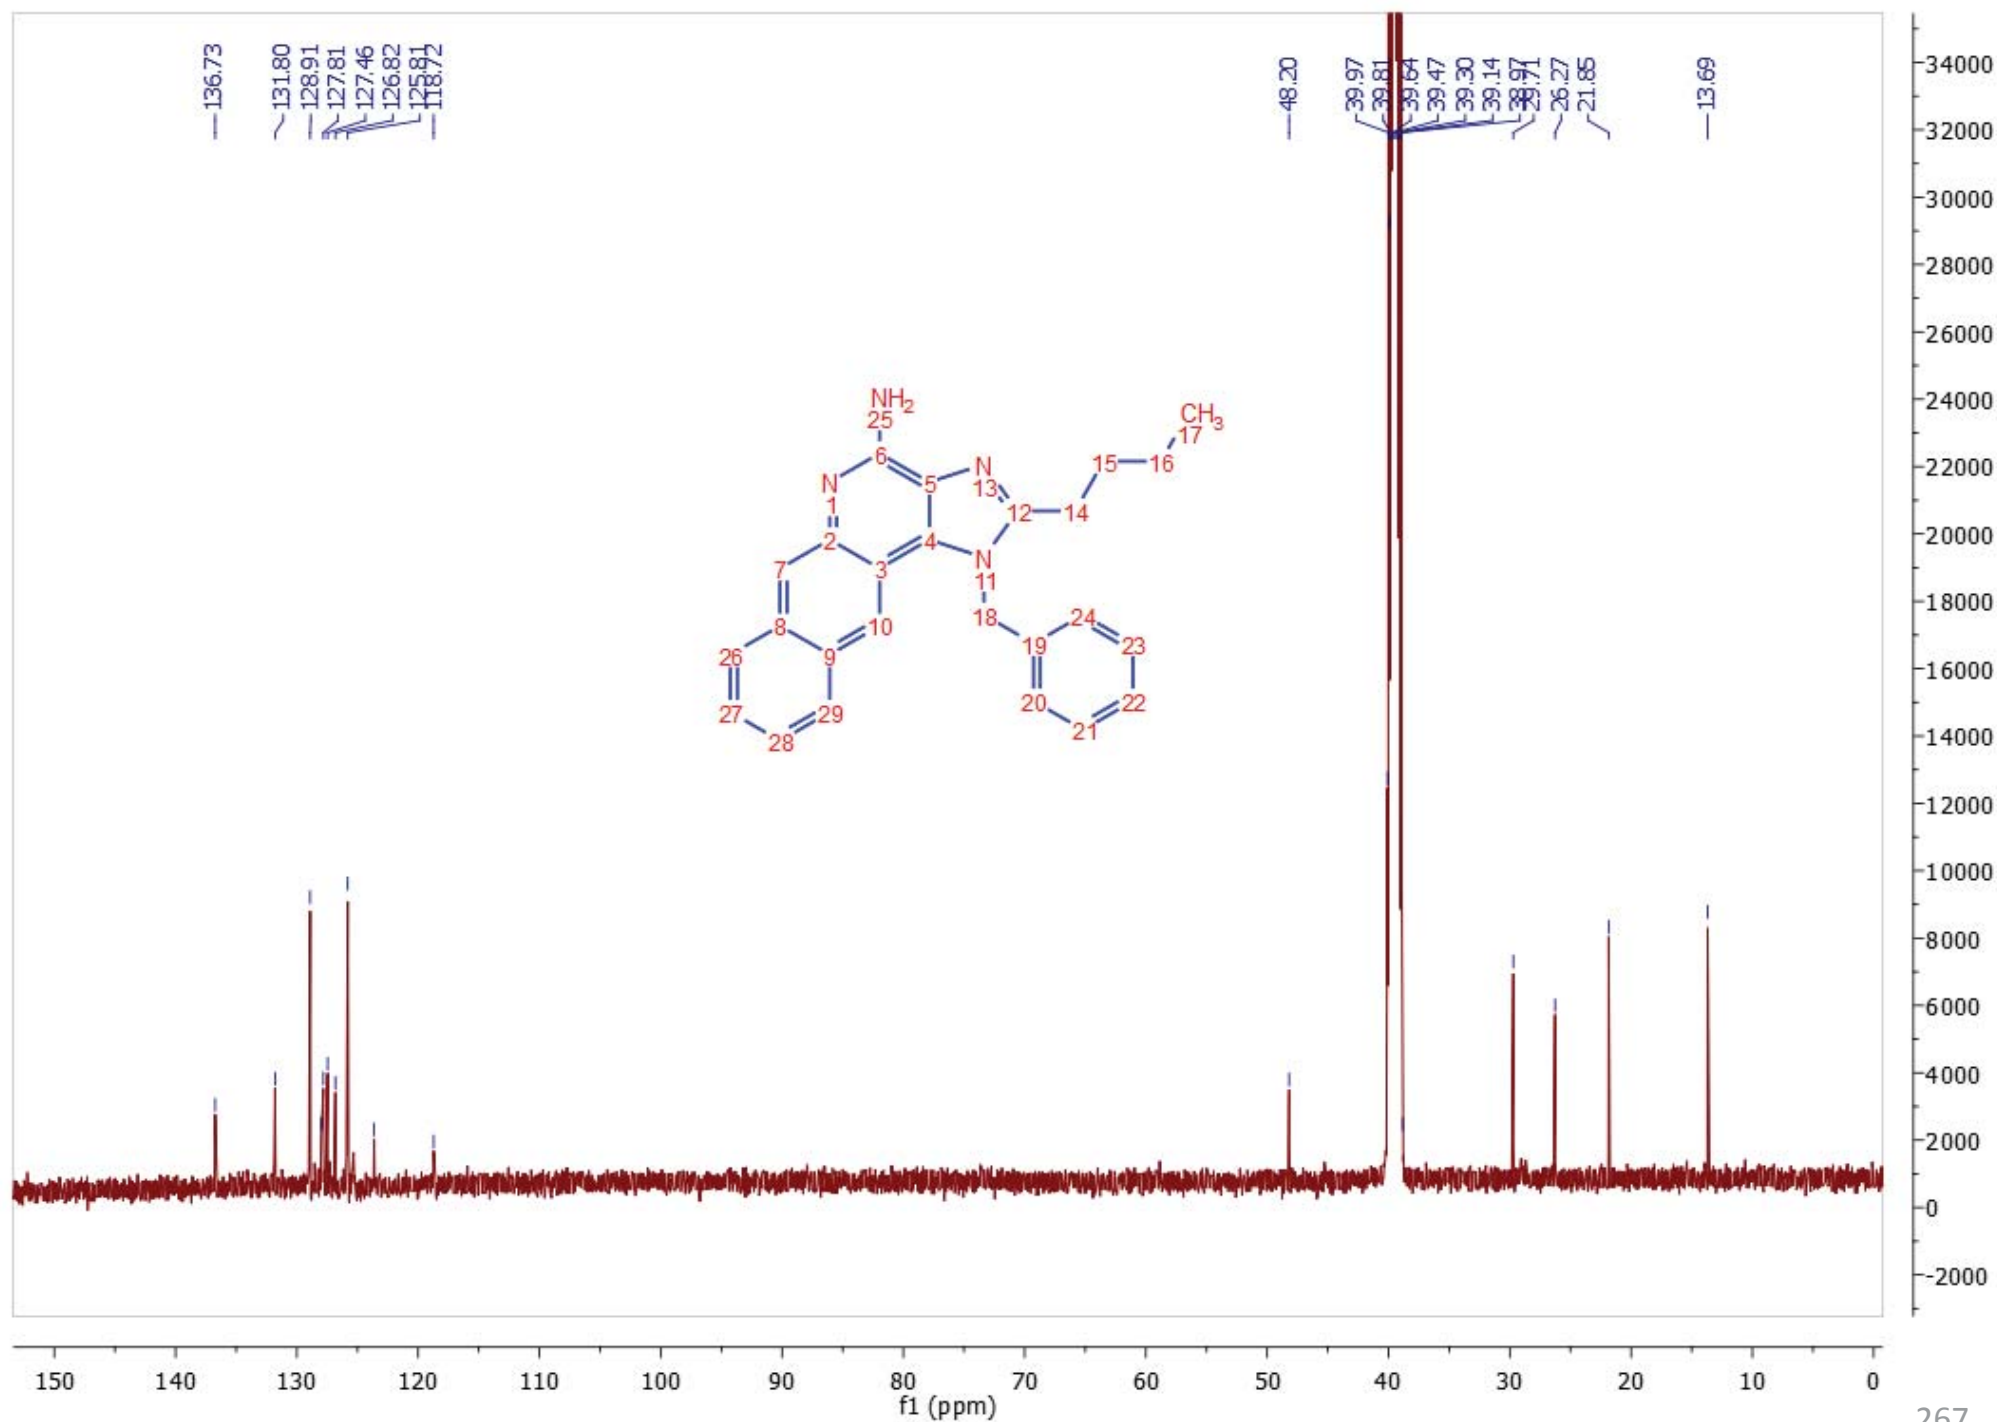

30 MS

|               |                      |             |                      |                 |              |                        |                    |
|---------------|----------------------|-------------|----------------------|-----------------|--------------|------------------------|--------------------|
| Sample Name   | 12.15.11 EY-1-155 20 | Position    | Vial 2               | Instrument Name | Instrument 1 | User Name              |                    |
| Inj Vol       | 8                    | InjPosition |                      | SampleType      | Sample       | IRM Calibration Status | Success            |
| Data Filename | 12.15.11 EY-1-155 20 | ACQ Method  | Water-ACN Infusion M | Comment         |              | Acquired Time          | 12/15/2011 3:44:38 |

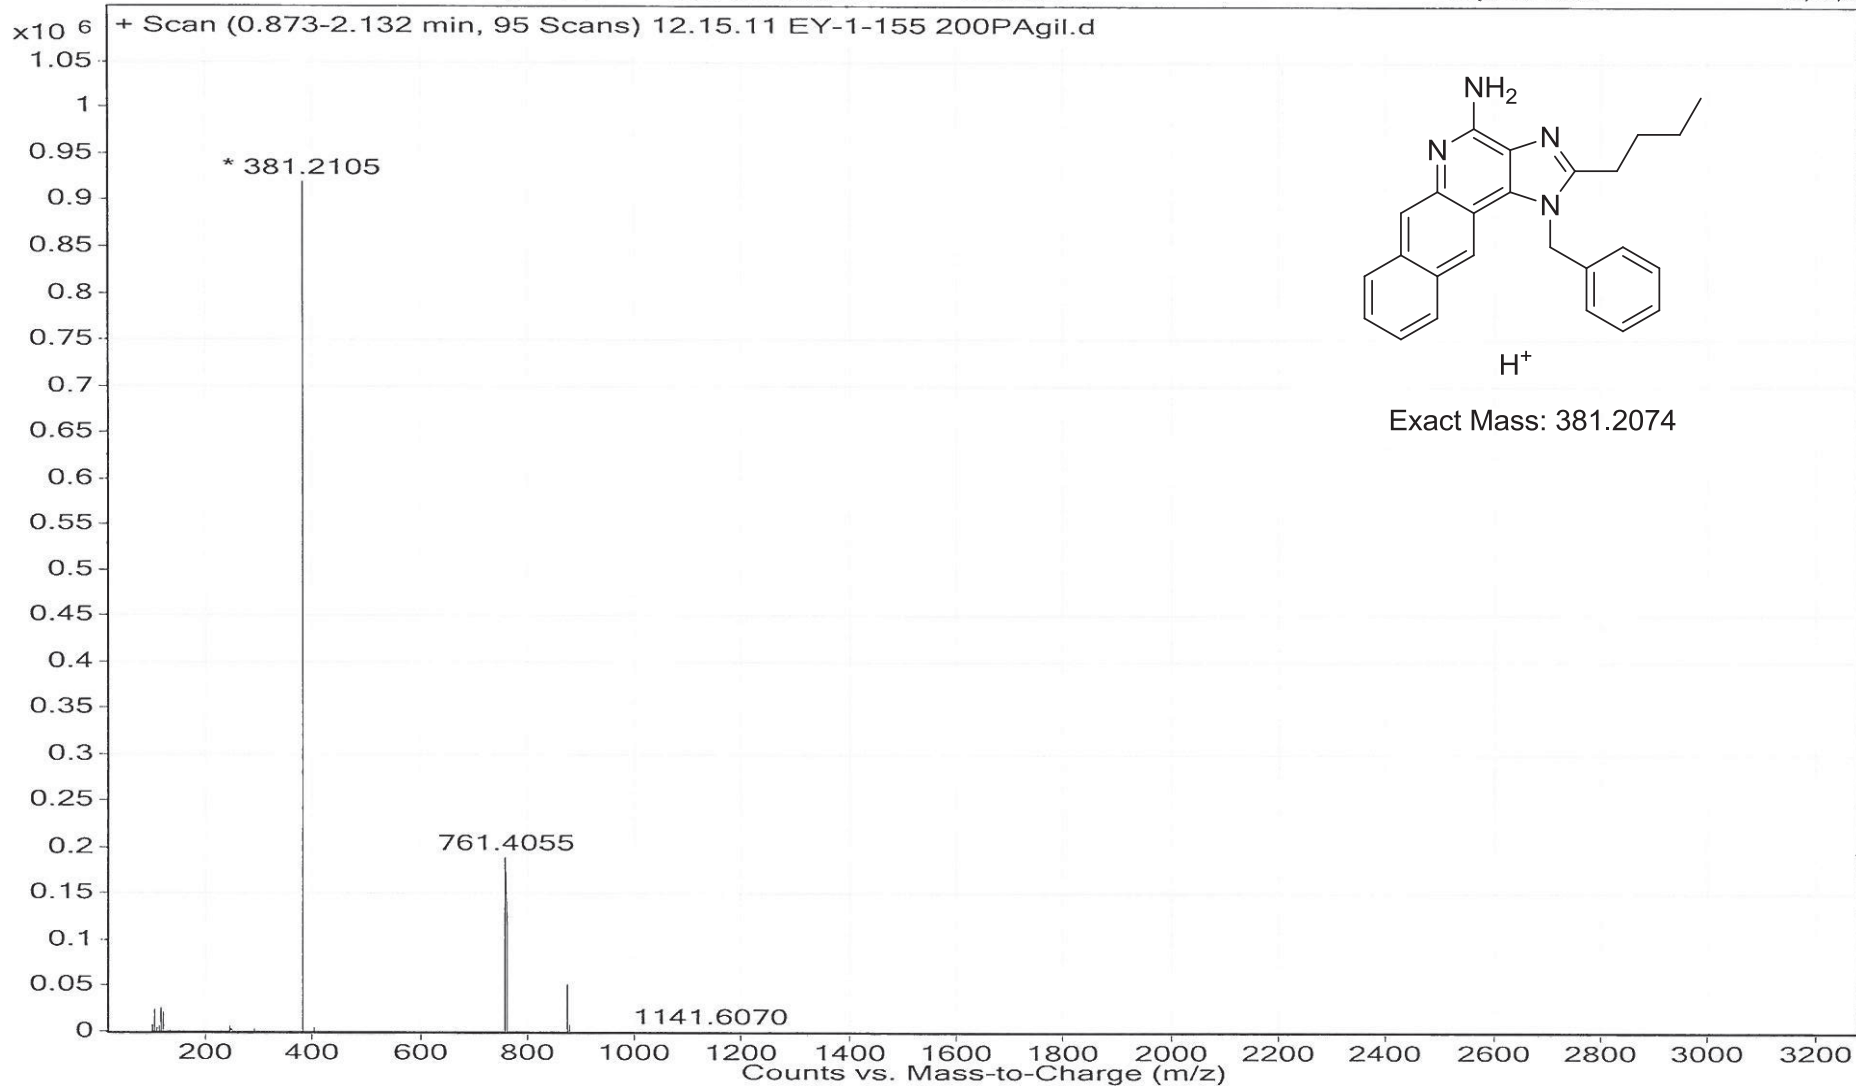

# 30 LC-MS

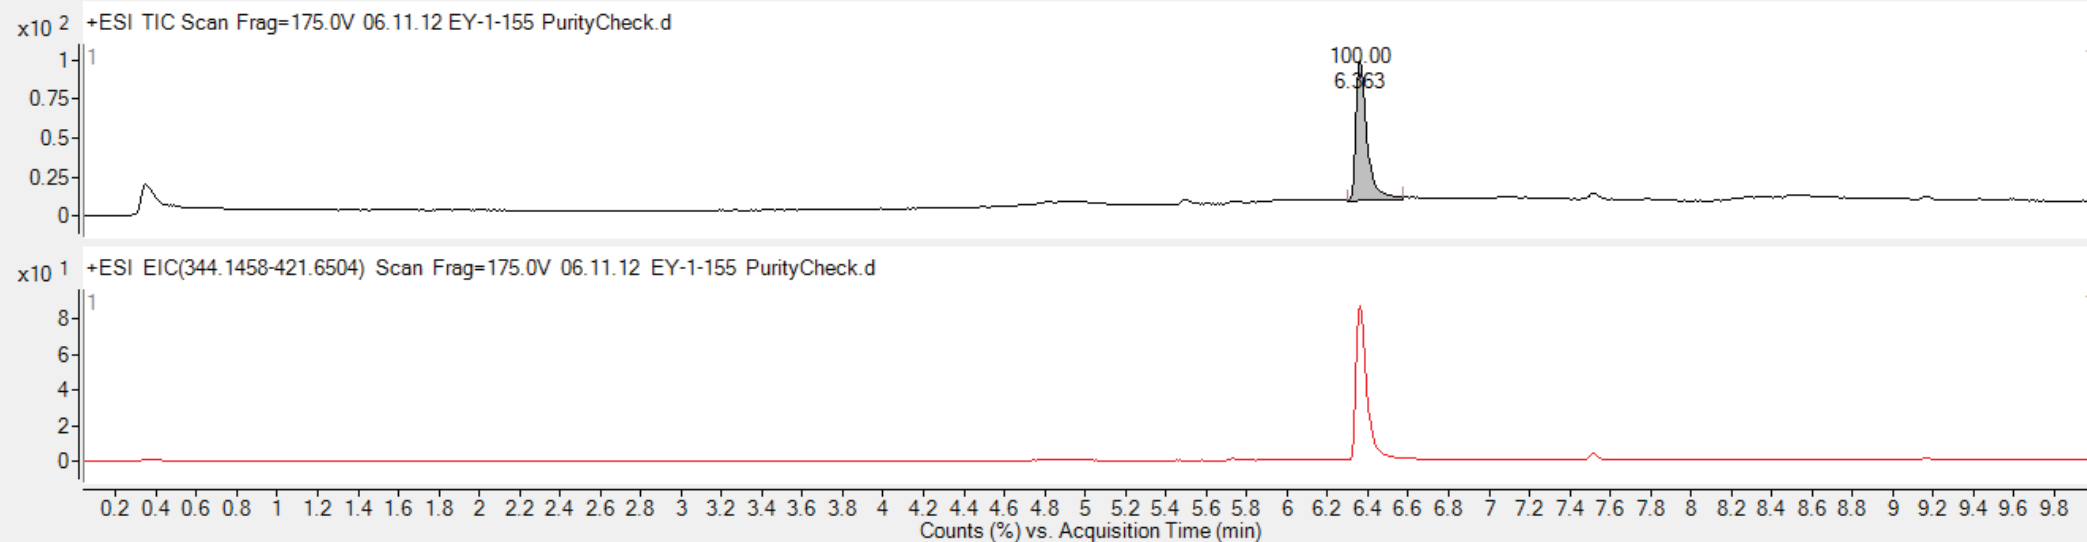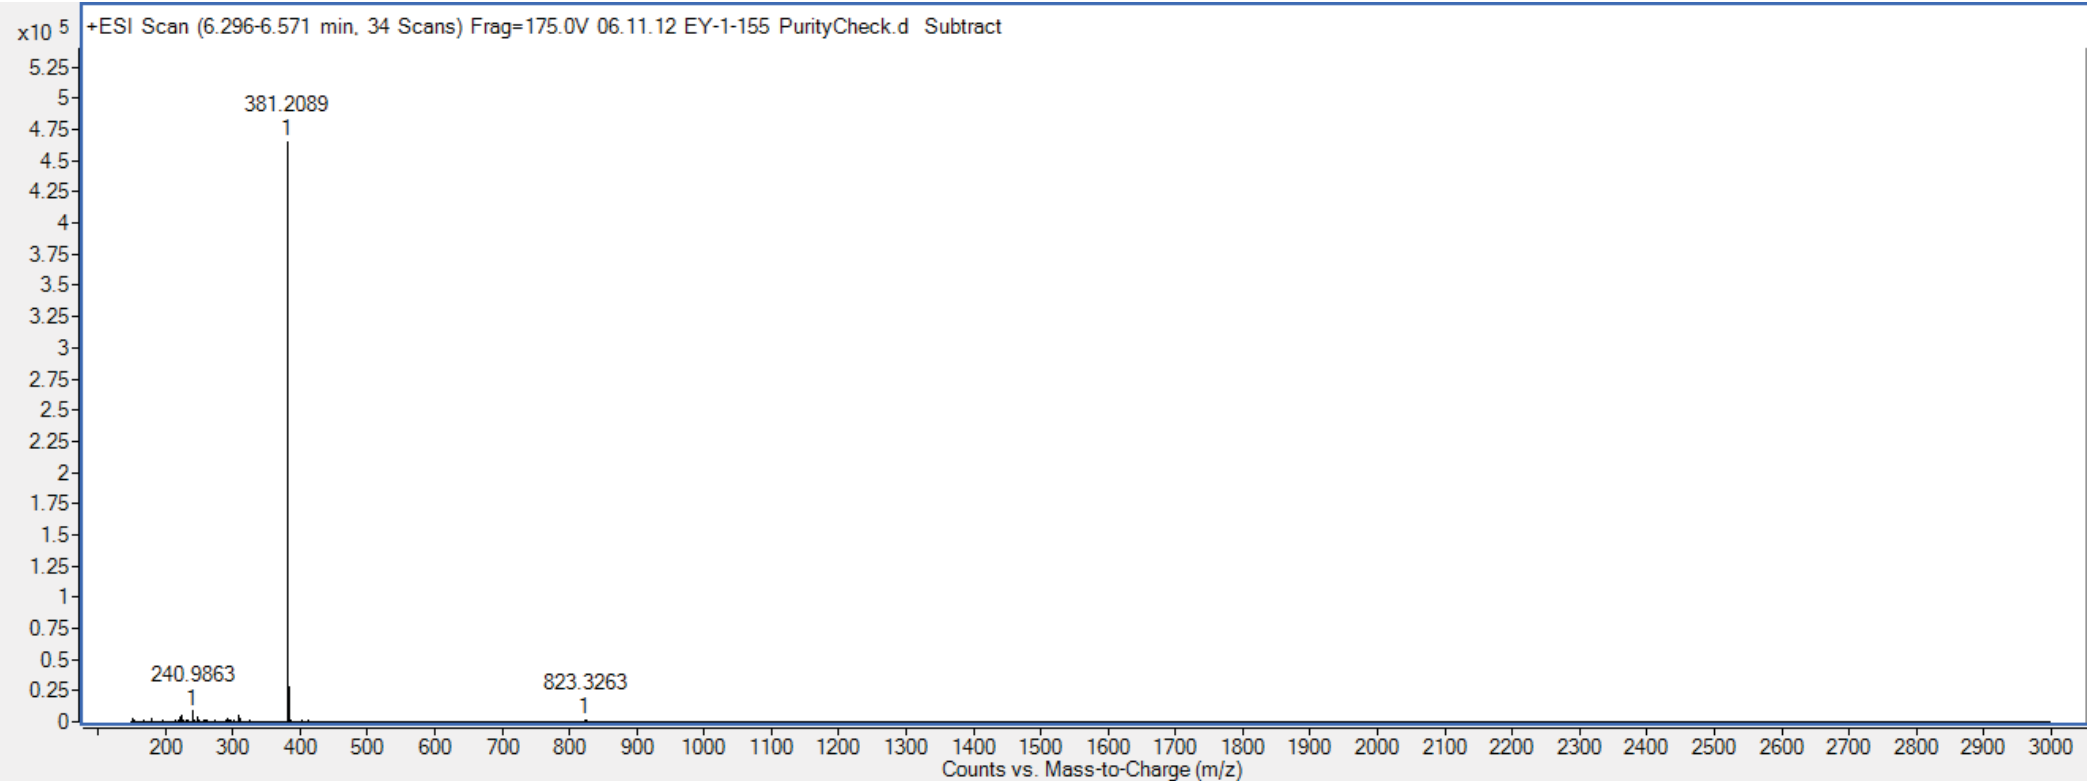

Supplement: c3ob40816g.pdf [file c3ob40816g.pdf]
